# Supplementary material for: Identification of SNPs Related to Salmonella Resistance in Chickens Using RNA-Seq and Integrated Bioinformatics Approach
Source: MDPI journal article supplement (doi:10.3390/genes14061283), 2023-06-17
Supplement: s1 [file s1]

**Table S1: Clinical scoring of the infected *Kashmir favorella* and broiler chicken breeds (n=6). The data has been presented as Mean  $\pm$ SD. The comparison of data was done by independent t test.**

| Parameter                  | Chicken Breed            | Mean clinical score $\pm$ SD      | F value     | df          | P-value      |
|----------------------------|--------------------------|-----------------------------------|-------------|-------------|--------------|
| Appearance                 | Broiler                  | 3.00 $\pm$ 0.632                  | 0.250       | 10          | 0.003        |
|                            | <i>Kashmir favorella</i> | 1.66 $\pm$ 0.516                  |             | 9.615       | 0.003        |
| Behaviour with provocation | Broiler                  | 3.00 $\pm$ 0.894                  | 0.160       | 10          | 0.111        |
|                            | <i>Kashmir favorella</i> | 2.1 $\pm$ 0.752                   |             | 9.61        | 0.111        |
| Provoked behaviour         | Broiler                  | 3.66 $\pm$ 0.516                  | 0.625       | 10          | 0.004        |
|                            | <i>Kashmir favorella</i> | 2.50 $\pm$ 0.547                  |             | 9.71        | 0.004        |
| Handling                   | Broiler                  | 2.50 $\pm$ 0.547                  | -           | 10          | 0.049        |
|                            | <i>Kashmir favorella</i> | 2.0 $\pm$ 0.00                    |             | 9.96        | 0.076        |
| <b>Total Score</b>         | <b>Broiler</b>           | <b>12.16<math>\pm</math>0.147</b> | <b>2.25</b> | <b>10</b>   | <b>0.00</b>  |
|                            | <i>Kashmir favorella</i> | <b>8.33<math>\pm</math>0.816</b>  |             | <b>7.81</b> | <b>0.001</b> |

**Table S2: Variant rate details**

| <b>Chromosome</b> | <b>Length</b> | <b>Variants in broiler</b> | <b>Variants in <i>Kashmir favorella</i></b> |
|-------------------|---------------|----------------------------|---------------------------------------------|
| 1                 | 197,608,386   | 181,016                    | 186,251                                     |
| 2                 | 149,682,049   | 120,327                    | 128,518                                     |
| 3                 | 110,838,418   | 100,357                    | 104,496                                     |
| 4                 | 91,315,245    | 94,863                     | 95,996                                      |
| 5                 | 59,809,098    | 75,868                     | 78,190                                      |
| 6                 | 36,374,701    | 44,514                     | 43,875                                      |
| 7                 | 36,742,308    | 39,088                     | 41,879                                      |
| 8                 | 30,219,446    | 38,358                     | 38,953                                      |
| 9                 | 24,153,086    | 34,179                     | 34,874                                      |
| 10                | 21,119,840    | 31,207                     | 30,320                                      |
| 11                | 20,200,042    | 23,550                     | 23,031                                      |
| 12                | 20,387,278    | 26,525                     | 25,642                                      |
| 13                | 19,166,714    | 23,610                     | 22,921                                      |
| 14                | 16,219,308    | 30,809                     | 28,582                                      |
| 15                | 13,062,184    | 25,024                     | 24,290                                      |
| 16                | 2,844,601     | 6,319                      | 5,076                                       |
| 17                | 10,762,512    | 21,064                     | 18,143                                      |
| 18                | 11,373,140    | 19,776                     | 20,063                                      |
| 19                | 10,323,212    | 22,185                     | 20,606                                      |

|    |            |        |        |
|----|------------|--------|--------|
| 20 | 13,897,287 | 24,291 | 21,866 |
| 21 | 6,844,979  | 15,288 | 14,978 |
| 22 | 5,459,462  | 5,036  | 4,045  |
| 23 | 6,149,580  | 14,235 | 12,279 |
| 24 | 6,491,222  | 8,535  | 8,112  |
| 25 | 3,980,610  | 8,926  | 6,757  |
| 26 | 6,055,710  | 15,726 | 14,092 |
| 27 | 8,080,432  | 13,582 | 10,542 |
| 28 | 5,116,882  | 16,157 | 14,983 |
| 30 | 1,818,525  | 3,414  | 3,004  |
| 31 | 6,153,034  | 10,318 | 5,380  |
| 32 | 725,831    | 1,995  | 1,499  |
| 33 | 7,821,666  | 8,246  | 6,507  |

**Table S3: SNP type in broiler chicken**

| Type     | Percent |
|----------|---------|
| HIGH     | 0.091%  |
| LOW      | 5.689%  |
| MODERATE | 1.968%  |
| MODIFIER | 92.252% |

| Type     | Percent |
|----------|---------|
| MISSENSE | 26.845% |
| NONSENSE | 0.167%  |
| SILENT   | 72.988% |

**Table S4: SNP type in *Kashmir favorella* chicken**

| Type     | Percent |
|----------|---------|
| HIGH     | 0.076   |
| LOW      | 5.467   |
| MODERATE | 1.812   |
| MODIFIER | 92.645  |

| Type     | Percent |
|----------|---------|
| MISSENSE | 26.036  |
| NONSENSE | 0.178   |
| SILENT   | 73.785  |

**Table S5: Pathways affected by high-impact SNPs in *Kashmir favorella***

| Pathway                  | ID       | Genes | FE%  | P-value | FDR <sup>2</sup> |
|--------------------------|----------|-------|------|---------|------------------|
| MAPK signaling pathway   | gga04010 | 17    | 6.51 | 0.00817 | 0.1352           |
| ECM-receptor interaction | gga04512 | 8     | 9.63 | 0.00852 | 0.1393           |
| Carbon metabolism        | gga01200 | 9     | 8.82 | 0.00909 | 0.1406           |
| Wnt signaling pathway    | gga04310 | 11    | 7.80 | 0.00958 | 0.1457           |
| FoxO signaling pathway   | gga04068 | 10    | 8.13 | 0.01024 | 0.1505           |

|                                     |          |    |       |          |        |
|-------------------------------------|----------|----|-------|----------|--------|
| Cellular senescence                 | gga04218 | 11 | 7.69  | 0.01050  | 0.1535 |
| NOD-like receptor signaling pathway | gga04621 | 10 | 8.06  | 0.01076  | 0.1555 |
| Phagosome                           | gga04145 | 12 | 9.09  | 0.00225  | 0.0676 |
| Endocytosis                         | gga04144 | 17 | 7.45  | 0.00232  | 0.0676 |
| Apoptosis                           | gga04210 | 11 | 8.66  | 0.00473  | 0.0972 |
| Notch signaling pathway             | gga04330 | 6  | 13.63 | 0.00494  | 0.1000 |
| Herpes simplex virus 1 infection    | gga05168 | 12 | 8.00  | 0.00583  | 0.1097 |
| Protein processing in ER            | gga04141 | 12 | 7.84  | 0.00673  | 0.1234 |
| Ribosome                            | gga03010 | 15 | 12.5  | 2.74E-05 | 0.0047 |
| Metabolic pathways                  | gga01100 | 70 | 5.42  | 5.41E-05 | 0.0071 |
| Protein export                      | gga03060 | 6  | 26.08 | 0.00026  | 0.0177 |
| Influenza A                         | gga05164 | 13 | 9.62  | 0.00092  | 0.0436 |
| Cell cycle                          | gga04110 | 11 | 9.64  | 0.00220  | 0.0676 |
| Tryptophan metabolism               | gga00380 | 6  | 15.38 | 0.00289  | 0.0733 |
| Lysine degradation                  | gga00310 | 7  | 12.96 | 0.00317  | 0.0767 |

**Table S6: Pathways affected by high-impact SNPs in broiler.**

| Pathway                          | ID       | Genes | FE%   | P-value  | FDR <sup>2</sup> |
|----------------------------------|----------|-------|-------|----------|------------------|
| Metabolic pathways               | gga01100 | 86    | 6.66  | 1.33E-06 | 0.0003           |
| Herpes simplex virus 1 infection | gga05168 | 18    | 12.00 | 5.35E-05 | 0.0063           |
| Fatty acid biosynthesis          | gga00061 | 6     | 35.29 | 0.000148 | 0.0130           |

|                                             |          |    |       |          |        |
|---------------------------------------------|----------|----|-------|----------|--------|
| Influenza A                                 | gga05164 | 16 | 11.85 | 0.000155 | 0.0132 |
| Fatty acid metabolism                       | gga01212 | 9  | 16.98 | 0.000434 | 0.0288 |
| Carbon metabolism                           | gga01200 | 12 | 11.76 | 0.001059 | 0.0548 |
| Citrate cycle (TCA cycle)                   | gga00020 | 6  | 21.42 | 0.001394 | 0.0655 |
| NOD-like receptor signaling pathway         | gga04621 | 13 | 10.48 | 0.001742 | 0.0747 |
| Arginine and proline metabolism             | gga00330 | 7  | 16.66 | 0.002048 | 0.0775 |
| Ribosome                                    | gga03010 | 12 | 10.00 | 0.003669 | 0.0956 |
| Adipocytokine signaling pathway             | gga04920 | 8  | 12.50 | 0.005023 | 0.1140 |
| Lysosome                                    | gga04142 | 11 | 10.00 | 0.005289 | 0.1170 |
| Cellular senescence                         | gga04218 | 13 | 9.09  | 0.005369 | 0.1170 |
| Apoptosis                                   | gga04210 | 12 | 9.44  | 0.00555  | 0.1175 |
| Lysine degradation                          | gga00310 | 7  | 12.96 | 0.007107 | 0.1291 |
| RNA transport                               | gga03013 | 12 | 9.09  | 0.007312 | 0.1311 |
| Phagosome                                   | gga04145 | 12 | 9.09  | 0.007312 | 0.1311 |
| Protein processing in endoplasmic reticulum | gga04141 | 13 | 8.49  | 0.008906 | 0.1428 |
| RIG-I-like receptor signaling pathway       | gga04622 | 7  | 12.28 | 0.009205 | 0.1437 |
| Endocytosis                                 | gga04144 | 17 | 7.45  | 0.009984 | 0.1497 |

**Table S7: Gene Ontology analysis of genes with high impact SNPs and INDELs in *Kashmir favorella*.**

| GO Term                                              | GO ID      | Genes | FE%   | P Value  |
|------------------------------------------------------|------------|-------|-------|----------|
| <b>Molecular Function</b>                            |            |       |       |          |
| ATP binding                                          | GO:0005524 | 86    | 8.01  | 2.51E-13 |
| Histone binding                                      | GO:0042393 | 17    | 17.34 | 1.42E-07 |
| RNA binding                                          | GO:0003723 | 32    | 8.76  | 1.73E-06 |
| Protein C-terminus binding                           | GO:0008022 | 15    | 14.15 | 7.26E-06 |
| Identical protein binding                            | GO:0042802 | 45    | 6.63  | 1.68E-05 |
| DNA binding                                          | GO:0003677 | 31    | 7.69  | 2.78E-05 |
| Magnesium ion binding                                | GO:0000287 | 17    | 11.03 | 3.51E-05 |
| Structural constituent of ribosome                   | GO:0003735 | 15    | 11.71 | 5.39E-05 |
| Enzyme binding                                       | GO:0019899 | 14    | 11.47 | 0.000116 |
| Protein homodimerization activity                    | GO:0042803 | 31    | 7.07  | 0.000117 |
| <b>Biological Processes</b>                          |            |       |       |          |
| Negative regulation of cell population proliferation | GO:0008285 | 19    | 10.32 | 2.90E-05 |
| Magnesium ion transport                              | GO:0015693 | 5     | 55.55 | 5.10E-05 |
| Iron-sulfur cluster assembly                         | GO:0016226 | 6     | 35.29 | 6.50E-05 |
| Nucleosome assembly                                  | GO:0006334 | 7     | 25    | 1.00E-04 |
| Ribosomal large subunit assembly                     | GO:0000027 | 6     | 31.57 | 0.0001   |
| Translation                                          | GO:0006412 | 13    | 12.14 | 0.0001   |
| Neural tube closure                                  | GO:0001843 | 9     | 16.98 | 0.0001   |

|                                                                |            |     |       |          |
|----------------------------------------------------------------|------------|-----|-------|----------|
| Response to virus                                              | GO:0009615 | 7   | 23.33 | 0.0001   |
| Negative regulation of transcription by RNA polymerase II      | GO:0000122 | 34  | 6.53  | 0.0002   |
| Negative regulation of phosphatidylinositol 3-kinase signaling | GO:0014067 | 4   | 57.14 | 0.0002   |
| <b>Cellular Function</b>                                       |            |     |       |          |
| Nucleoplasm                                                    | GO:0005654 | 121 | 7.92  | 3.38E-18 |
| Cytosol                                                        | GO:0005829 | 143 | 6.84  | 2.78E-16 |
| Nucleus                                                        | GO:0005634 | 152 | 6.13  | 1.64E-13 |
| Cytoplasm                                                      | GO:0005737 | 144 | 6.26  | 1.85E-13 |
| Mitochondrion                                                  | GO:0005739 | 47  | 7.61  | 3.29E-07 |
| Plasma membrane                                                | GO:0005886 | 87  | 5.50  | 3.74E-06 |
| Chromatin                                                      | GO:0000785 | 10  | 14.08 | 0.000248 |
| Cul4-RING E3 ubiquitin ligase complex                          | GO:0080008 | 5   | 35.71 | 0.00026  |
| Integral component of membrane                                 | GO:0016021 | 117 | 4.56  | 0.00026  |
| Protein-containing complex                                     | GO:0032991 | 20  | 8.33  | 0.000273 |

**Table S8: Gene Ontology analysis of genes with high impact SNPs and INDELs in broiler**

| GO Term                   | GO ID      | Genes | FE%   | P-Value  |
|---------------------------|------------|-------|-------|----------|
| <b>Molecular Function</b> |            |       |       |          |
| ATP binding               | GO:0005524 | 101   | 9.41  | 1.98E-15 |
| Magnesium ion binding     | GO:0000287 | 21    | 13.63 | 2.20E-06 |
| Unfolded protein binding  | GO:0051082 | 13    | 19.69 | 6.12E-06 |



|                                                              |            |     |       |          |
|--------------------------------------------------------------|------------|-----|-------|----------|
| Chromatin binding                                            | GO:0003682 | 30  | 10    | 6.18E-06 |
| protein C-terminus binding                                   | GO:0008022 | 16  | 15.09 | 1.13E-05 |
| RNA binding                                                  | GO:0003723 | 33  | 9.04  | 1.50E-05 |
| metal ion binding                                            | GO:0046872 | 51  | 7.14  | 4.00E-05 |
| DNA binding                                                  | GO:0003677 | 34  | 8.43  | 4.14E-05 |
| Histone binding                                              | GO:0042393 | 14  | 14.28 | 6.74E-05 |
| mRNA binding                                                 | GO:0003729 | 17  | 11.48 | 0.00013  |
| <b>Biological Processes</b>                                  |            |     |       |          |
| Negative regulation of cell population proliferation         | GO:0008285 | 20  | 10.86 | 7.46E-05 |
| T cell differentiation                                       | GO:0030217 | 7   | 30.43 | 8.93E-05 |
| Positive regulation of transcription, DNA-templated          | GO:0045893 | 22  | 9.90  | 0.0001   |
| Regulation of microtubule polymerization or depolymerisation | GO:0031110 | 5   | 45.45 | 0.0002   |
| Fatty acid metabolic process                                 | GO:0006631 | 7   | 25    | 0.0002   |
| Protein folding                                              | GO:0006457 | 11  | 14.86 | 0.0002   |
| Protein phosphorylation                                      | GO:0006468 | 21  | 9.29  | 0.0003   |
| <b>Cellular Component</b>                                    |            |     |       |          |
| Cytosol                                                      | GO:0005829 | 174 | 8.32  | 3.64E-21 |
| Nucleoplasm                                                  | GO:0005654 | 138 | 9.04  | 1.59E-19 |
| Nucleus                                                      | GO:0005634 | 179 | 7.22  | 6.82E-16 |
| Cytoplasm                                                    | GO:0005737 | 147 | 6.39  | 1.90E-09 |

|                       |            |     |      |          |
|-----------------------|------------|-----|------|----------|
| Plasma membrane       | GO:0005886 | 106 | 6.70 | 5.18E-08 |
| Endoplasmic reticulum | GO:0005783 | 47  | 8.96 | 3.07E-07 |
| Mitochondrion         | GO:0005739 | 51  | 8.26 | 9.45E-07 |
| Centrosome            | GO:0005813 | 32  | 9.60 | 6.53E-06 |
