# Supplementary material for: Identification of SNPs Related to Salmonella Resistance in Chickens Using RNA-Seq and Integrated Bioinformatics Approach
Source: Genes (Basel). 2023 Jun 17;14(6):1283. doi: 10.3390/genes14061283 (PMC10297900; doi:10.3390/genes14061283)
Supplement: Supplementary file 1 [file genes-14-01283-s001.zip]

Archive with 4 entries (4 files):
- Supplementary figure S1.pdf
- Supplementary File 1.xlsx
- Supplementary File 2.xlsx
- Supplementary table.pdf
