# Supplementary material for: Identification of SNPs Related to Salmonella Resistance in Chickens Using RNA-Seq and Integrated Bioinformatics Approach
Source: Genes (Basel). 2023 Jun 17;14(6):1283. doi: 10.3390/genes14061283 (PMC10297900; doi:10.3390/genes14061283)
Supplement: Supplementary file 1 [file genes-14-01283-s001.zip › Supplementary File 1.xlsx]

## Sheet: Kashmiri_HighImpactSNPs
Chr	Chr_location	DB_SNP ID	Ref Nucleotide	Mutated Nucleotide	SNP Nature	Impact	Gene
1	27505	.	T	C	splice_donor_variant&intron_variant	HIGH	ENSGALG00000045540
1	31486	.	T	C	splice_donor_variant&intron_variant	HIGH	ENSGALG00000051297
1	61798377	.	C	T	splice_acceptor_variant&intron_variant	HIGH	ATP6V1E1
1	195650800	.	C	T	splice_donor_variant&intron_variant	HIGH	ENSGALG00000049220
1	79917070	.	G	A	splice_donor_variant&intron_variant	HIGH	GDAP2
1	91131754	.	G	T	splice_donor_variant&intron_variant	HIGH	ARL13B
1	80728613	.	G	A	stop_gained	HIGH	GPR156
1	123686313	.	C	T	splice_donor_variant&intron_variant	HIGH	ENSGALG00000050849
1	141417489	.	T	C	start_lost	HIGH	ENSGALG00000048470
1	138746952	.	T	C	stop_lost	HIGH	DCUN1D2
1	131659523	.	G	T	splice_donor_variant&intron_variant	HIGH	TUBGCP5
1	20732643	.	G	A	splice_donor_variant&intron_variant	HIGH	ENSGALG00000049506
1	167747031	.	C	A	stop_gained	HIGH	AKAP11
1	127793167	.	A	C	splice_donor_variant&intron_variant	HIGH	STS
1	6852588	.	C	T	splice_donor_variant&intron_variant	HIGH	NUDT5
1	20573740	.	A	C	splice_donor_variant&intron_variant	HIGH	MAPK11
1	80166927	.	C	A	stop_gained	HIGH	ENSGALG00000032036
1	196002506	.	C	T	stop_gained	HIGH	SPCS2
1	155590437	.	C	A	stop_gained	HIGH	MYCBP2
1	113402395	.	A	G	splice_donor_variant&intron_variant	HIGH	ENSGALG00000016236
1	135026683	.	T	C	splice_donor_variant&intron_variant	HIGH	MAP4K4
1	49176932	.	G	A	splice_acceptor_variant&intron_variant	HIGH	ENSGALG00000019325
1	197405731	.	G	C	splice_donor_variant&intron_variant	HIGH	APBB1
1	135124519	.	T	A	splice_donor_variant&intron_variant	HIGH	IL1R1
1	135124518	.	G	A	splice_donor_variant&intron_variant	HIGH	IL1R1
1	4717684	.	C	T	stop_gained	HIGH	ENSGALG00000029446
1	20499866	.	T	C	splice_acceptor_variant&intron_variant	HIGH	HDAC10
1	302531	.	A	G	stop_lost	HIGH	CLC2DL3
1	20573741	.	C	G	splice_donor_variant&intron_variant	HIGH	MAPK11
1	13931748	.	T	C	splice_donor_variant&intron_variant	HIGH	KMT2E
1	35623234	.	G	A	splice_donor_variant&intron_variant	HIGH	CCT2
1	88830972	.	A	T	splice_donor_variant&intron_variant	HIGH	KIAA1524
1	71356947	.	T	G	splice_donor_variant&intron_variant	HIGH	ENSGALG00000048687
1	71356946	.	G	A	splice_donor_variant&intron_variant	HIGH	ENSGALG00000048687
1	38030046	.	C	T	splice_donor_variant&intron_variant	HIGH	NAP1L1
1	140202484	.	C	T	splice_donor_variant&intron_variant	HIGH	COL4A1
1	86000512	.	T	A	splice_acceptor_variant&intron_variant	HIGH	TOMM70
1	15603105	.	C	G	splice_donor_variant&intron_variant	HIGH	ENSGALG00000043872
1	106634148	.	T	C	splice_acceptor_variant&intron_variant	HIGH	ENSGALG00000054333
1	197384860	.	C	T	stop_gained	HIGH	FAM160A2
1	175910180	.	C	A	stop_gained	HIGH	BRCA2
1	136401557	.	G	A	stop_gained	HIGH	TGFBRAP1
1	23927024	.	G	A	splice_donor_variant&intron_variant	HIGH	ENSGALG00000036488
1	93299227	.	G	A	stop_gained	HIGH	ENSGALG00000047821
1	84731801	.	C	A	stop_gained	HIGH	F5
1	61839110	.	T	A	splice_acceptor_variant&intron_variant	HIGH	BID
1	88830973	.	C	A	splice_donor_variant&intron_variant	HIGH	KIAA1524
1	78016391	.	C	T	splice_donor_variant&intron_variant	HIGH	PHB2
1	78016390	.	A	C	splice_donor_variant&intron_variant	HIGH	PHB2
1	20570459	.	C	G	splice_donor_variant&intron_variant	HIGH	MAPK11
1	74614406	.	C	A	splice_donor_variant&intron_variant	HIGH	VWF
1	40222547	.	T	C	splice_donor_variant&intron_variant	HIGH	ACSS3
1	124335998	.	C	G	splice_donor_variant&intron_variant	HIGH	OFD1
1	137716676	.	C	T	stop_gained	HIGH	ENSGALG00000045815
1	178448680	.	C	G	splice_acceptor_variant&intron_variant	HIGH	ENSGALG00000053206
1	156313116	.	G	A	stop_gained	HIGH	LMO7
1	93319294	.	C	T	splice_donor_variant&intron_variant	HIGH	ENSGALG00000047247
1	113402396	.	C	T	splice_donor_variant&intron_variant	HIGH	ENSGALG00000016236
1	144196438	.	A	G	splice_donor_variant&intron_variant	HIGH	ERCC5
1	144196439	.	T	A	splice_donor_variant&intron_variant	HIGH	ERCC5
1	135145516	.	G	A	splice_donor_variant&intron_variant	HIGH	ENSGALG00000030526
1	135145517	.	T	C	splice_donor_variant&intron_variant	HIGH	ENSGALG00000030526
1	142896452	.	G	A	stop_gained	HIGH	ENSGALG00000048309
1	191574287	.	C	A	splice_donor_variant&intron_variant	HIGH	SYTL2
1	175895593	.	G	A	stop_gained	HIGH	ENSGALG00000017072
1	50789697	.	A	T	splice_acceptor_variant&intron_variant	HIGH	NPTXR
1	195589438	.	C	T	stop_gained	HIGH	MADPRT1
1	68105586	.	G	A	splice_acceptor_variant&intron_variant	HIGH	STK38L
1	19053325	.	G	A	splice_donor_variant&intron_variant	HIGH	CRELD2
1	78083708	.	T	C	splice_donor_variant&intron_variant	HIGH	CLSTN3
1	219085	.	C	G	stop_gained	HIGH	CLC2DL3
1	14116025	.	C	T	splice_donor_variant&intron_variant	HIGH	ENSGALG00000047845
1	78689232	.	G	T	stop_gained	HIGH	EPHB6
1	78083707	.	G	A	splice_donor_variant&intron_variant	HIGH	CLSTN3
1	194794	.	T	C	stop_lost	HIGH	ENSGALG00000042611
1	259385	.	A	G	start_lost	HIGH	ENSGALG00000053510
1	169106673	.	C	G	splice_donor_variant&intron_variant	HIGH	SLC25A30
1	124358012	.	A	T	stop_gained	HIGH	TCEANC
1	171735068	.	G	A	stop_gained	HIGH	VPS36
1	61790482	.	T	C	splice_acceptor_variant&intron_variant	HIGH	ATP6V1E1
1	28575231	.	T	A	stop_gained	HIGH	THAP5
1	109298671	.	G	T	splice_donor_variant&intron_variant	HIGH	BRWD1
1	135185793	.	G	T	splice_donor_variant&intron_variant	HIGH	IL1RL1
1	49436588	.	T	C	splice_acceptor_variant&intron_variant	HIGH	WBP2NL
1	75554307	.	A	C	splice_acceptor_variant&intron_variant	HIGH	SLC2A14
1	54711746	.	C	T	splice_acceptor_variant&intron_variant	HIGH	HSP90B1
1	137657011	.	T	C	stop_lost	HIGH	ENSGALG00000046960
1	1744463	.	G	A	splice_acceptor_variant&intron_variant	HIGH	ENSGALG00000053060
1	103804430	.	A	G	splice_donor_variant&intron_variant	HIGH	MRPL39
1	93299755	.	G	T	stop_lost	HIGH	ENSGALG00000047821
1	108406721	.	A	T	stop_gained	HIGH	VPS26C
1	84801764	.	G	C	splice_acceptor_variant&intron_variant	HIGH	CCDC181
1	1711796	.	C	A	stop_lost	HIGH	TASOR2
1	62135960	.	C	A	splice_donor_variant&intron_variant	HIGH	AKR1E2
1	21884195	.	C	T	stop_gained	HIGH	POT1
1	71320297	.	A	C	splice_acceptor_variant&intron_variant	HIGH	ENSGALG00000014551
1	242816	.	G	T	splice_acceptor_variant&intron_variant	HIGH	ENSGALG00000051297
1	106660281	.	C	A	splice_acceptor_variant&intron_variant	HIGH	TMEM50B
1	171429179	.	G	T	stop_gained	HIGH	INTS6
1	157641571	.	C	T	stop_gained	HIGH	MZT1
1	106702028	.	A	G	splice_donor_variant&intron_variant	HIGH	GART
1	63104343	.	G	T	splice_donor_variant&intron_variant	HIGH	STRAP
1	832130	.	C	A	splice_acceptor_variant&intron_variant	HIGH	ENSGALG00000048328
1	141407189	.	A	C	stop_gained	HIGH	ENSGALG00000051579
1	197410214	.	G	C	splice_donor_variant&intron_variant	HIGH	APBB1
1	179014980	.	G	A	stop_gained	HIGH	SGCG
1	35624902	.	G	C	splice_donor_variant&intron_variant	HIGH	CCT2
1	25013115	.	C	T	splice_acceptor_variant&intron_variant	HIGH	CAPZA2
1	49175677	.	A	G	splice_acceptor_variant&intron_variant	HIGH	ENSGALG00000019325
1	77737136	.	T	C	splice_acceptor_variant&intron_variant	HIGH	ING4
1	39835717	.	G	T	splice_acceptor_variant&intron_variant	HIGH	RPS16
1	41925	.	C	A	stop_gained	HIGH	ENSGALG00000042023
1	195028	.	C	T	stop_gained	HIGH	ENSGALG00000042611
1	1071045	.	C	G	stop_gained	HIGH	ENSGALG00000054297
1	31232626	.	T	C	splice_acceptor_variant&intron_variant	HIGH	SLC38A4
1	51766827	.	A	T	splice_acceptor_variant&intron_variant	HIGH	MYH9
1	137771327	.	G	T	stop_gained	HIGH	ENSGALG00000044260
1	80724020	.	G	A	stop_gained	HIGH	GPR156
1	135115204	.	T	G	splice_donor_variant&intron_variant	HIGH	IL1R1
1	175898645	.	G	A	splice_acceptor_variant&intron_variant	HIGH	ENSGALG00000017072
1	135115203	.	G	A	splice_donor_variant&intron_variant	HIGH	IL1R1
1	186228854	.	T	A	stop_gained	HIGH	CCDC82
1	155302866	.	G	C	splice_donor_variant&intron_variant	HIGH	EDNRB
1	129991959	.	C	T	stop_gained	HIGH	ZBED1
1	50979087	.	C	T	splice_donor_variant&intron_variant	HIGH	MAFF
1	137782759	.	G	A	splice_acceptor_variant&intron_variant	HIGH	ENSGALG00000044260
1	50693176	.	T	C	splice_donor_variant&intron_variant	HIGH	RPL3
1	45576438	.	C	A	splice_donor_variant&intron_variant	HIGH	METAP2
1	88748478	.	C	T	stop_gained	HIGH	IFT57
1	87717958	.	G	A	splice_donor_variant&intron_variant	HIGH	ALCAM
1	121604143	.	G	A	splice_acceptor_variant&intron_variant	HIGH	SH3KBP1
1	137652657	.	G	C	splice_acceptor_variant&intron_variant	HIGH	ENSGALG00000046960
1	88748833	.	A	G	start_lost	HIGH	IFT57
1	114520209	.	G	A	stop_gained	HIGH	LANCL3
1	20570458	.	A	C	splice_donor_variant&intron_variant	HIGH	MAPK11
1	123714498	.	C	A	stop_gained	HIGH	FANCB
1	106728345	.	T	A	splice_acceptor_variant&intron_variant	HIGH	GART
1	1541792	.	T	G	splice_acceptor_variant&intron_variant	HIGH	ZC3HC1
1	1541791	.	G	A	splice_acceptor_variant&intron_variant	HIGH	ZC3HC1
2	35829120	.	G	A	splice_acceptor_variant&intron_variant	HIGH	KAT2B
2	64618023	.	A	G	splice_acceptor_variant&intron_variant	HIGH	ENSGALG00000019568
2	64318412	.	T	C	splice_donor_variant&intron_variant	HIGH	BLOC1S5
2	78294863	.	C	T	splice_donor_variant&intron_variant	HIGH	MARCHF6
2	14700924	.	C	T	splice_donor_variant&intron_variant	HIGH	SVIL
2	3981988	.	A	G	splice_donor_variant&intron_variant	HIGH	SETD2
2	43041420	.	C	T	splice_donor_variant&intron_variant	HIGH	CLEC3B
2	67782896	.	A	G	start_lost	HIGH	VPS4B
2	64615701	.	G	A	splice_acceptor_variant&intron_variant	HIGH	ENSGALG00000019568
2	116295311	.	G	C	splice_donor_variant&intron_variant	HIGH	SULF1
2	124682928	.	G	C	splice_donor_variant&intron_variant	HIGH	OTUD6A
2	116745009	.	A	C	splice_donor_variant&intron_variant	HIGH	TRAM1L1
2	98470414	.	A	G	start_lost	HIGH	PPP4R1
2	85648038	.	T	G	splice_acceptor_variant&intron_variant	HIGH	FH
2	6284873	.	G	A	splice_acceptor_variant&intron_variant	HIGH	NUB1
2	55333367	.	A	G	stop_lost	HIGH	ENSGALG00000047009
2	43934812	.	A	G	start_lost	HIGH	ENSGALG00000043381
2	101207611	.	G	T	stop_gained	HIGH	METTL4
2	57854275	.	A	G	splice_donor_variant&intron_variant	HIGH	MRS2
2	43399883	.	G	A	splice_donor_variant&intron_variant	HIGH	CTNNB1
2	141680586	.	T	G	splice_acceptor_variant&intron_variant	HIGH	TMEM71
2	129314456	.	T	C	splice_donor_variant&intron_variant	HIGH	DCAF13
2	129314455	.	G	A	splice_donor_variant&intron_variant	HIGH	DCAF13
2	126728860	.	A	T	splice_donor_variant&intron_variant	HIGH	MTERF3
2	31611231	.	A	C	stop_gained	HIGH	DFNA5
2	20318602	.	G	A	splice_donor_variant&intron_variant	HIGH	MINDY3
2	126174744	.	G	C	splice_donor_variant&intron_variant	HIGH	DPY19L4
2	113335523	.	C	T	splice_donor_variant&intron_variant	HIGH	ENSGALG00000047461
2	46920470	.	C	G	splice_donor_variant&intron_variant	HIGH	44446
2	46920472	.	C	G	splice_donor_variant&intron_variant	HIGH	44446
2	41456530	.	C	A	stop_gained	HIGH	CAPN7
2	112096254	.	T	A	stop_gained	HIGH	NSMAF
2	42593845	.	G	T	splice_donor_variant&intron_variant	HIGH	TOPBP1
2	80756047	.	G	A	stop_gained	HIGH	DDC
2	14910177	.	T	A	stop_gained	HIGH	JCAD
2	85648037	.	C	A	splice_acceptor_variant&intron_variant	HIGH	FH
2	111155865	.	T	C	splice_donor_variant&intron_variant	HIGH	LYN
2	116746666	.	C	A	splice_acceptor_variant&intron_variant	HIGH	TRAM1L1
2	130667003	.	C	T	stop_gained	HIGH	MAF1
2	130667002	.	C	T	stop_gained	HIGH	MAF1
2	35154348	.	T	C	stop_lost	HIGH	SATB1
2	131038022	.	G	T	splice_acceptor_variant&intron_variant	HIGH	ENSGALG00000048571
2	141840319	.	C	T	stop_gained&splice_region_variant	HIGH	ENSGALG00000049122
2	100912518	.	T	C	start_lost	HIGH	MYOM1
2	32203909	.	T	A	splice_donor_variant&intron_variant	HIGH	CBX3
2	149656045	.	C	T	splice_donor_variant&intron_variant	HIGH	ENSGALG00000036635
2	122618290	.	C	T	splice_acceptor_variant&intron_variant	HIGH	RBIS
2	56183780	.	G	T	splice_acceptor_variant&intron_variant	HIGH	HSBP1L1
2	145694499	.	C	T	splice_acceptor_variant&intron_variant	HIGH	ENSGALG00000053310
2	44642483	.	A	C	splice_donor_variant&intron_variant	HIGH	CLASP2
2	44642484	.	C	T	splice_donor_variant&intron_variant	HIGH	CLASP2
2	506715	.	T	C	stop_lost	HIGH	ENSGALG00000045581
2	56030152	.	G	A	splice_acceptor_variant&intron_variant	HIGH	RECK
2	46169636	.	G	A	splice_acceptor_variant&intron_variant	HIGH	ENSGALG00000029256
2	124306208	.	A	T	stop_lost	HIGH	DECR1
2	46228213	.	G	A	splice_acceptor_variant&intron_variant	HIGH	ENSGALG00000046643
2	125734558	.	T	C	splice_donor_variant&intron_variant	HIGH	ENSGALG00000046258
2	125734557	.	G	T	splice_donor_variant&intron_variant	HIGH	ENSGALG00000046258
2	31599592	.	G	T	stop_gained	HIGH	MPP6
2	54286042	.	C	T	splice_donor_variant&intron_variant	HIGH	EZH2
2	32194767	.	C	T	splice_donor_variant&intron_variant	HIGH	HNRNPA2B1
2	112087043	.	C	T	splice_donor_variant&intron_variant	HIGH	NSMAF
2	88548324	.	C	T	stop_gained	HIGH	CTNNAL1
2	138488862	.	C	T	splice_donor_variant&intron_variant	HIGH	TATDN1
2	986660	.	T	C	splice_acceptor_variant&intron_variant	HIGH	ENSGALG00000038522
2	116745010	.	C	T	splice_donor_variant&intron_variant	HIGH	TRAM1L1
2	78361068	.	G	A	splice_acceptor_variant&intron_variant	HIGH	ENSGALG00000013033
2	55329989	.	T	C	start_lost	HIGH	ENSGALG00000035050
2	37881728	.	G	C	splice_donor_variant&intron_variant	HIGH	OXSM
2	90579230	.	G	A	stop_gained	HIGH	ZNF236
2	131039218	.	C	T	splice_acceptor_variant&intron_variant	HIGH	ENSGALG00000052069
2	149657442	.	G	T	splice_acceptor_variant&intron_variant	HIGH	ENSGALG00000036635
2	65946281	.	A	G	splice_donor_variant&intron_variant	HIGH	PRPF4B
2	4434902	.	A	T	splice_donor_variant&intron_variant	HIGH	GARS
2	115701008	.	C	G	splice_donor_variant&intron_variant	HIGH	PREX2
2	46169540	.	A	G	splice_donor_variant&intron_variant	HIGH	ENSGALG00000029256
2	89767802	.	T	A	stop_gained	HIGH	GLIPR2
2	6426631	.	A	G	splice_donor_variant&intron_variant	HIGH	PRKAG2
2	45985294	.	C	A	splice_donor_variant&intron_variant	HIGH	STARD3NL
2	31155684	.	C	T	stop_gained	HIGH	IGF2BP3
2	54272299	.	G	C	splice_acceptor_variant&intron_variant	HIGH	CUL1
2	97333366	.	T	C	splice_donor_variant&intron_variant	HIGH	MPPE1
2	89697001	.	A	T	splice_donor_variant&intron_variant	HIGH	SEC61B
2	48887190	.	G	A	stop_gained	HIGH	GOLGA4
2	75642966	.	G	A	splice_acceptor_variant&intron_variant	HIGH	ENSGALG00000036466
2	37863077	.	A	G	stop_lost	HIGH	NGLY1
2	64310924	.	G	C	splice_donor_variant&intron_variant	HIGH	BLOC1S5
2	115620606	.	T	A	stop_gained	HIGH	PREX2
2	65685382	.	G	A	stop_gained	HIGH	ENSGALG00000012808
3	87293581	.	T	A	splice_donor_variant&intron_variant	HIGH	ENSGALG00000051085
3	87293580	.	G	A	splice_donor_variant&intron_variant	HIGH	ENSGALG00000051085
3	54735140	.	G	C	splice_donor_variant&intron_variant	HIGH	ENSGALG00000053814
3	53091757	.	T	C	splice_donor_variant&intron_variant	HIGH	ENSGALG00000030501
3	51550354	.	A	C	splice_acceptor_variant&intron_variant	HIGH	ARID1B
3	9627954	.	T	C	splice_donor_variant&intron_variant	HIGH	COMMD1
3	76885780	.	T	C	splice_donor_variant&intron_variant	HIGH	SYNCRIP
3	100145078	.	A	T	splice_donor_variant&intron_variant	HIGH	SMC6
3	40912720	.	T	C	splice_acceptor_variant&intron_variant	HIGH	FAM120B
3	45513548	.	G	T	splice_acceptor_variant&intron_variant	HIGH	ENSGALG00000004293
3	11955731	.	G	T	stop_lost	HIGH	PLEK
3	16134578	.	T	C	start_lost	HIGH	ENSGALG00000049318
3	16134577	.	A	G	start_lost	HIGH	ENSGALG00000049318
3	80883414	.	T	C	splice_donor_variant&intron_variant	HIGH	COL12A1
3	80883413	.	G	T	splice_donor_variant&intron_variant	HIGH	COL12A1
3	108770847	.	G	T	stop_lost	HIGH	RHAG
3	55312867	.	G	T	splice_acceptor_variant&intron_variant	HIGH	BCLAF1
3	16717197	.	T	C	splice_acceptor_variant&intron_variant	HIGH	SOS1
3	25557293	.	T	G	splice_donor_variant&intron_variant	HIGH	PPM1B
3	76865926	.	G	T	splice_donor_variant&intron_variant	HIGH	ENSGALG00000052055
3	97445805	.	T	C	splice_donor_variant&intron_variant	HIGH	LPIN1
3	104545087	.	G	A	stop_gained	HIGH	MAPRE3
3	27906657	.	C	G	splice_donor_variant&intron_variant	HIGH	SLC4A1AP
3	38360592	.	G	A	splice_acceptor_variant&intron_variant	HIGH	ENSGALG00000052212
3	243335	.	A	G	splice_donor_variant&intron_variant	HIGH	PNPT1
3	97445804	.	G	A	splice_donor_variant&intron_variant	HIGH	LPIN1
3	104505734	.	C	A	stop_gained	HIGH	MPV17
3	77946734	.	C	T	stop_gained&splice_region_variant	HIGH	DOP1A
3	48099361	.	G	A	splice_donor_variant&intron_variant	HIGH	ENSGALG00000031045
3	8743472	.	T	A	splice_acceptor_variant&intron_variant	HIGH	YPEL5
3	82411935	.	T	C	splice_donor_variant&intron_variant	HIGH	ENSGALG00000053388
3	61387917	.	C	T	splice_acceptor_variant&intron_variant	HIGH	HSF2
3	108779340	.	C	T	stop_gained	HIGH	CYP2AC1
3	26744674	.	T	A	splice_donor_variant&intron_variant	HIGH	EPAS1
3	8152085	.	T	G	splice_acceptor_variant&intron_variant	HIGH	ENSGALG00000032863
3	33633648	.	A	T	stop_gained	HIGH	CEBPZ
3	243336	.	C	T	splice_donor_variant&intron_variant	HIGH	PNPT1
3	75515238	.	C	T	stop_gained	HIGH	MDN1
3	38159161	.	C	G	splice_donor_variant&intron_variant	HIGH	ENSGALG00000013950
3	39023963	.	T	C	splice_donor_variant&intron_variant	HIGH	PCNX2
3	107360143	.	A	C	splice_acceptor_variant&intron_variant	HIGH	FDFT1
3	41942187	.	T	A	splice_acceptor_variant&intron_variant	HIGH	SULT
3	17008541	.	C	T	splice_donor_variant&intron_variant	HIGH	TRMT6
3	38284798	.	G	C	splice_acceptor_variant&intron_variant	HIGH	ENSGALG00000048698
3	110795302	.	G	A	stop_gained	HIGH	ENSGALG00000016732
3	16137101	.	T	G	splice_acceptor_variant&intron_variant	HIGH	PEX6
3	104526745	.	C	G	splice_donor_variant&intron_variant	HIGH	ENSGALG00000042005
3	941076	.	G	A	splice_acceptor_variant&intron_variant	HIGH	VRK2
3	68102065	.	T	A	stop_lost	HIGH	QRSL1
3	16719300	.	C	A	stop_gained&splice_region_variant	HIGH	SOS1
3	88345158	.	G	A	stop_gained&splice_region_variant	HIGH	ICK
3	8332687	.	G	A	splice_donor_variant&intron_variant	HIGH	ENSGALG00000046970
3	62787699	.	G	A	splice_donor_variant&intron_variant	HIGH	FAM184A
3	4555810	.	G	T	splice_donor_variant&intron_variant	HIGH	ENSGALG00000029333
3	9569698	.	T	C	splice_donor_variant&intron_variant	HIGH	PPP1R21
3	76966166	.	G	C	stop_lost&splice_region_variant	HIGH	SNX14
3	40789484	.	T	C	splice_donor_variant&intron_variant	HIGH	PDCD2
3	45506073	.	G	T	splice_donor_variant&intron_variant	HIGH	ENSGALG00000004293
3	48250172	.	T	G	splice_donor_variant&intron_variant	HIGH	GINM1
3	10390193	.	A	G	splice_donor_variant&intron_variant	HIGH	ENSGALG00000047433
3	45480006	.	T	G	splice_donor_variant&intron_variant	HIGH	ENSGALG00000028886
3	109701009	.	A	G	stop_lost	HIGH	ENPP4
3	80793246	.	A	T	splice_acceptor_variant&intron_variant	HIGH	COX7A2
3	48099250	.	A	G	splice_acceptor_variant&intron_variant	HIGH	ENSGALG00000031045
3	42945405	.	G	C	splice_donor_variant&intron_variant	HIGH	MPC1L
3	42945406	.	T	A	splice_donor_variant&intron_variant	HIGH	MPC1L
3	61380858	.	G	C	splice_donor_variant&intron_variant	HIGH	SERINC1
3	26874000	.	G	A	splice_donor_variant&intron_variant	HIGH	CRIPT
3	86831844	.	T	C	start_lost	HIGH	BEND6
3	51759953	.	C	G	stop_gained	HIGH	ZDHHC14
3	38547105	.	G	T	splice_acceptor_variant&intron_variant	HIGH	TARBP1
3	39717574	.	G	A	stop_gained	HIGH	DISC1
3	104813963	.	C	T	splice_donor_variant&intron_variant	HIGH	ASXL2
3	104958549	.	G	A	stop_gained	HIGH	ENSGALG00000016556
3	15684657	.	G	T	stop_lost&splice_region_variant	HIGH	CST3
3	45688846	.	T	G	splice_acceptor_variant&intron_variant	HIGH	MRPL18
3	38142008	.	T	A	splice_donor_variant&intron_variant	HIGH	B3GALNT2
4	34318560	.	T	G	splice_donor_variant&intron_variant	HIGH	HSPA4L
4	34975993	.	G	T	splice_donor_variant&intron_variant	HIGH	ENSGALG00000052558
4	39475232	.	G	T	splice_acceptor_variant&intron_variant	HIGH	CENPU
4	24972294	.	C	T	stop_gained	HIGH	DDX60
4	56659736	.	G	T	splice_donor_variant&intron_variant	HIGH	CAMK2D
4	86184081	.	C	T	stop_gained	HIGH	RPIA
4	85388068	.	G	T	stop_gained	HIGH	ST3GAL5
4	91048493	.	C	T	splice_acceptor_variant&intron_variant	HIGH	IDH3B
4	49270445	.	A	G	splice_donor_variant&intron_variant	HIGH	ENSGALG00000053080
4	85603832	.	C	T	splice_acceptor_variant&intron_variant	HIGH	ENSGALG00000015805
4	13919748	.	T	C	splice_acceptor_variant&intron_variant	HIGH	ENSGALG00000008141
4	1889871	.	G	A	splice_donor_variant&intron_variant	HIGH	RPS4Y1
4	85755035	.	A	G	start_lost	HIGH	ENSGALG00000045876
4	90974829	.	C	T	stop_gained	HIGH	ENSGALG00000054913
4	60983907	.	C	A	splice_acceptor_variant&intron_variant	HIGH	BDH2
4	50842827	.	A	C	splice_acceptor_variant&intron_variant	HIGH	ALB
4	85858859	.	C	T	stop_gained	HIGH	ENSGALG00000048382
4	91130621	.	C	A	splice_acceptor_variant&intron_variant	HIGH	CDC25B
4	61189305	.	G	T	stop_gained	HIGH	SORBS2
4	17698885	.	C	T	stop_gained	HIGH	ENSGALG00000009075
4	16499755	.	G	A	splice_acceptor_variant&intron_variant	HIGH	UPF3B
4	80867582	.	G	A	splice_acceptor_variant&intron_variant	HIGH	HTRA3
4	50841552	.	G	A	splice_donor_variant&intron_variant	HIGH	ALB
4	39483720	.	G	A	splice_donor_variant&intron_variant	HIGH	PRIMPOL
4	12825957	.	A	T	splice_donor_variant&intron_variant	HIGH	ATRX
4	63139574	.	C	T	splice_donor_variant&intron_variant	HIGH	VPS37A
4	2204397	.	C	T	splice_donor_variant&intron_variant	HIGH	OGT
4	20895610	.	G	A	splice_donor_variant&intron_variant	HIGH	TDO2
4	76655651	.	T	C	start_lost	HIGH	FBXL5
4	49247968	.	G	C	splice_donor_variant&intron_variant	HIGH	SRP72
4	29288643	.	G	T	splice_donor_variant&intron_variant	HIGH	NAA15
4	62991994	.	G	A	splice_acceptor_variant&intron_variant	HIGH	MTUS1
4	69811430	.	A	C	splice_acceptor_variant&intron_variant	HIGH	PGM2
4	69811429	.	C	G	splice_acceptor_variant&intron_variant	HIGH	PGM2
4	49270564	.	G	A	splice_acceptor_variant&intron_variant	HIGH	ENSGALG00000053080
4	85795996	.	C	T	stop_gained	HIGH	ENSGALG00000053568
4	66572586	.	C	T	splice_acceptor_variant&intron_variant	HIGH	NIPAL1
4	2364823	.	C	T	splice_acceptor_variant&intron_variant	HIGH	MED12
4	20337408	.	C	T	splice_donor_variant&intron_variant	HIGH	FGG
4	20337407	.	A	G	splice_donor_variant&intron_variant	HIGH	FGG
4	69352510	.	G	C	splice_acceptor_variant&intron_variant	HIGH	RFC1
4	45777848	.	C	A	stop_gained	HIGH	AFF1
4	60225597	.	C	T,G	splice_donor_variant&intron_variant	HIGH	ENSGALG00000046550
4	60134564	.	A	G	splice_donor_variant&intron_variant	HIGH	DNAJB14
4	66765569	.	C	T	stop_gained	HIGH	ATP10D
4	74962392	.	G	T	stop_gained	HIGH	PACRGL
4	38748579	.	C	T	splice_acceptor_variant&intron_variant	HIGH	ENSGALG00000053686
4	60955431	.	C	T	stop_gained	HIGH	ENSGALG00000012319
4	1263099	.	C	G	stop_gained	HIGH	ENSGALG00000028681
4	67594197	.	C	G	splice_donor_variant&intron_variant	HIGH	GNPDA2
4	16500900	.	G	A	splice_acceptor_variant&intron_variant	HIGH	UPF3B
4	50400822	.	A	C	splice_donor_variant&intron_variant	HIGH	GC
4	75876885	.	C	T	stop_gained	HIGH	ENSGALG00000051383
4	37959506	.	C	A	stop_lost	HIGH	CYP2U1
4	11671950	.	C	T	stop_gained	HIGH	AMER1
4	90969653	.	C	T	stop_gained	HIGH	ENSGALG00000054891
4	20293407	.	T	G	splice_acceptor_variant&intron_variant	HIGH	PLRG1
4	73660539	.	T	A	stop_gained	HIGH	CCDC149
4	39782742	.	T	A	splice_donor_variant&intron_variant	HIGH	RWDD4
4	39782741	.	G	C	splice_donor_variant&intron_variant	HIGH	RWDD4
4	17336780	.	G	A	stop_gained	HIGH	RNF128
4	62767586	.	G	A	splice_acceptor_variant&intron_variant	HIGH	ENSGALG00000013590
4	75879773	.	A	T	stop_gained	HIGH	ENSGALG00000054173
4	30602980	.	C	A	splice_donor_variant&intron_variant	HIGH	SMARCA5
4	49253653	.	G	C	splice_donor_variant&intron_variant	HIGH	SRP72
4	39475231	.	A	C	splice_acceptor_variant&intron_variant	HIGH	CENPU
5	50317012	.	T	A	splice_donor_variant&intron_variant	HIGH	EXOC3L4
5	55002942	.	C	A	splice_donor_variant&intron_variant	HIGH	L3HYPDH
5	5241429	.	T	C	splice_donor_variant&intron_variant	HIGH	DNAJC24
5	25180772	.	T	G	splice_donor_variant&intron_variant	HIGH	AXL
5	25180771	.	G	A	splice_donor_variant&intron_variant	HIGH	AXL
5	32187165	.	A	G	start_lost	HIGH	DPH6
5	19342608	.	G	A	stop_gained	HIGH	ENSGALG00000007886
5	46809527	.	A	G	start_lost	HIGH	VRK1
5	41159237	.	C	T	splice_donor_variant&intron_variant	HIGH	SEL1L
5	36293910	.	G	C	splice_donor_variant&intron_variant	HIGH	SRP54
5	36293911	.	T	C	splice_donor_variant&intron_variant	HIGH	SRP54
5	9389831	.	C	A	stop_gained	HIGH	SBF2
5	23881509	.	G	T	splice_acceptor_variant&intron_variant	HIGH	CHRM4
5	9142316	.	C	G	splice_acceptor_variant&intron_variant	HIGH	MRVI1
5	30262539	.	G	A	splice_donor_variant&intron_variant	HIGH	ENSGALG00000027520
5	50520921	.	A	G	splice_acceptor_variant&intron_variant	HIGH	CKB
5	57957935	.	C	T	splice_donor_variant&intron_variant	HIGH	MAP4K5
5	24712401	.	G	A	stop_gained	HIGH	INO80
5	17231522	.	C	T	stop_gained	HIGH	MED19
5	641050	.	G	C	splice_donor_variant&intron_variant	HIGH	ENSGALG00000030153
5	41176042	.	C	T	splice_donor_variant&intron_variant	HIGH	SEL1L
5	36483625	.	A	G	splice_donor_variant&intron_variant	HIGH	RALGAPA1
5	37225501	.	A	G	splice_acceptor_variant&intron_variant	HIGH	MIPOL1
5	4803297	.	C	G	splice_donor_variant&intron_variant	HIGH	ARL14EP
5	23795920	.	C	T	stop_gained	HIGH	AMBRA1
5	44463713	.	C	T	splice_donor_variant&intron_variant	HIGH	CCDC88C
5	302110	.	C	G	splice_acceptor_variant&intron_variant	HIGH	PGA5
5	313203	.	T	A	splice_acceptor_variant&intron_variant	HIGH	DDB1
5	313202	.	G	A	splice_acceptor_variant&intron_variant	HIGH	DDB1
5	25251010	.	C	T	stop_gained	HIGH	MGA
5	34776002	.	A	C	splice_acceptor_variant&intron_variant	HIGH	NUBPL
5	39591101	.	A	C	splice_acceptor_variant&intron_variant	HIGH	ADCK1
5	22234663	.	G	A	splice_donor_variant&intron_variant	HIGH	CD82
5	22234664	.	T	A	splice_donor_variant&intron_variant	HIGH	CD82
5	56645018	.	T	C	splice_donor_variant&intron_variant	HIGH	GMFB
5	9824832	.	A	G	splice_acceptor_variant&intron_variant	HIGH	ASCL3
5	44008401	.	G	T	stop_gained	HIGH	PSMC1
5	22536970	.	T	A	splice_donor_variant&intron_variant	HIGH	PRDM11
5	13322671	.	G	T	splice_donor_variant&intron_variant	HIGH	NAP1L4
5	50665258	.	C	T	splice_acceptor_variant&intron_variant	HIGH	XRCC3
5	48744100	.	A	G	splice_acceptor_variant&intron_variant	HIGH	ENSGALG00000052029
5	14312753	.	A	G	splice_acceptor_variant&intron_variant	HIGH	ENSGALG00000006608
5	17795486	.	C	G	splice_donor_variant&intron_variant	HIGH	ORAOV1
6	24351350	.	T	A	splice_donor_variant&intron_variant	HIGH	AS3MT
6	11168669	.	C	T	splice_acceptor_variant&intron_variant	HIGH	ENSGALG00000047312
6	16094134	.	C	T	splice_donor_variant&intron_variant	HIGH	ADK
6	28398133	.	A	T	splice_acceptor_variant&intron_variant	HIGH	HABP2
6	18658498	.	A	T	splice_acceptor_variant&intron_variant	HIGH	ENSGALG00000044811
6	17517976	.	T	A	splice_acceptor_variant&intron_variant	HIGH	TM9SF3
6	23300250	.	T	C	stop_lost&splice_region_variant	HIGH	MMS19
6	10066660	.	C	G	splice_donor_variant&intron_variant	HIGH	ECHS1
6	26837189	.	C	T	splice_donor_variant&intron_variant	HIGH	SMNDC1
6	25199673	.	G	A	splice_donor_variant&intron_variant	HIGH	GSTO2
6	11906871	.	C	T	splice_acceptor_variant&intron_variant	HIGH	NUDT13
6	5893458	.	A	G	splice_donor_variant&intron_variant	HIGH	ANXA11
6	3028915	.	G	A	stop_gained	HIGH	WAPL
6	3505630	.	T	C	splice_acceptor_variant&intron_variant	HIGH	ENSGALG00000002089
6	33455647	.	C	T	stop_gained&splice_region_variant	HIGH	EDRF1
6	24005811	.	T	G	splice_acceptor_variant&intron_variant	HIGH	ENSGALG00000049370
6	10070727	.	T	C	splice_acceptor_variant&intron_variant	HIGH	MTG1
6	16094133	.	A	T	splice_donor_variant&intron_variant	HIGH	ADK
6	7330592	.	G	A	stop_gained	HIGH	SIRT1
6	29035255	.	G	T	stop_gained	HIGH	TRUB1
6	23318277	.	T	C	stop_lost	HIGH	RRP12
6	21984706	.	G	T	splice_acceptor_variant&intron_variant	HIGH	ENSGALG00000047490
6	23299762	.	G	A	stop_gained	HIGH	MMS19
6	18629569	.	C	A	splice_donor_variant&intron_variant	HIGH	FAM21C
6	28608611	.	C	A	stop_gained	HIGH	ADRB1
6	5188692	.	G	A	stop_gained	HIGH	SFTPA1
6	1266681	.	T	A	stop_gained	HIGH	ENSGALG00000039727
7	27181027	.	C	T	stop_gained	HIGH	ENSGALG00000050781
7	30440000	.	T	C	start_lost	HIGH	ACMSD
7	23559283	.	T	C	splice_donor_variant&intron_variant	HIGH	TMEM169
7	36416375	.	C	G	splice_donor_variant&intron_variant	HIGH	PKP4
7	30640558	.	G	T	splice_acceptor_variant&intron_variant	HIGH	ENSGALG00000012259
7	11292033	.	G	A	splice_donor_variant&intron_variant	HIGH	BZW1
7	26582047	.	G	T	splice_donor_variant&intron_variant	HIGH	SEMA5B
7	26582048	.	C	T	splice_donor_variant&intron_variant	HIGH	SEMA5B
7	26124032	.	C	T	splice_donor_variant&intron_variant	HIGH	CLASP1
7	26124031	.	A	C	splice_donor_variant&intron_variant	HIGH	CLASP1
7	25231830	.	A	G	splice_donor_variant&intron_variant	HIGH	MRAS
7	22140065	.	C	T	stop_gained	HIGH	DNPEP
7	11159649	.	T	C	splice_donor_variant&intron_variant	HIGH	SPATS2L
7	27168243	.	C	T	splice_donor_variant&intron_variant	HIGH	HACD2
7	336179	.	T	C	start_lost	HIGH	ORMDL1
7	336180	.	G	A	start_lost	HIGH	ORMDL1
7	30634827	.	G	A	start_lost	HIGH	ENSGALG00000012259
7	35108756	.	G	T	splice_donor_variant&intron_variant	HIGH	NMI
7	5642147	.	G	T	splice_acceptor_variant&intron_variant	HIGH	SPP2
7	16210187	.	C	A	splice_acceptor_variant&intron_variant	HIGH	MTX2
7	7182256	.	A	G	splice_donor_variant&intron_variant	HIGH	ITGB2
7	22587110	.	C	G	splice_donor_variant&intron_variant	HIGH	ARPC2
7	31426127	.	G	A	splice_acceptor_variant&intron_variant	HIGH	ENSGALG00000048656
7	7294352	.	A	G	splice_acceptor_variant&intron_variant	HIGH	ADARB1
7	30645063	.	T	C	splice_acceptor_variant&intron_variant	HIGH	ENSGALG00000012259
7	13874121	.	A	T	splice_acceptor_variant&intron_variant	HIGH	ENSGALG00000053678
7	28220898	.	T	A	stop_gained	HIGH	ENSGALG00000026422
7	21065402	.	G	C	splice_acceptor_variant&intron_variant	HIGH	IFIH1
8	19198087	.	T	A	splice_acceptor_variant&intron_variant	HIGH	GIPC2
8	3045046	.	C	T	splice_donor_variant&intron_variant	HIGH	ENSGALG00000002431
8	19251828	.	C	T	stop_gained	HIGH	FUBP1
8	25482996	.	C	A	splice_acceptor_variant&intron_variant	HIGH	TMEM59
8	29959429	.	G	C	stop_lost	HIGH	TNNI3K
8	14262166	.	G	T	stop_gained	HIGH	GCLM
8	27024328	.	G	A	splice_acceptor_variant&intron_variant	HIGH	ENSGALG00000054726
8	1841650	.	T	C	splice_acceptor_variant&intron_variant	HIGH	DDX59
8	2838773	.	T	C	splice_donor_variant&intron_variant	HIGH	DENND1B
8	4704012	.	T	A	splice_donor_variant&intron_variant	HIGH	TADA1
8	11243550	.	G	A	stop_gained	HIGH	SWT1
8	15526378	.	A	C	splice_acceptor_variant&intron_variant	HIGH	KYAT3
8	2438893	.	T	A	stop_gained	HIGH	PTPRC
8	4372412	.	A	C	splice_donor_variant&intron_variant	HIGH	CRIP1
8	14565756	.	T	G	splice_acceptor_variant&intron_variant	HIGH	RPAP2
8	2146979	.	C	T	splice_donor_variant&intron_variant	HIGH	ENSGALG00000048748
8	4630706	.	A	C	splice_acceptor_variant&intron_variant	HIGH	HMGCS2
8	25518797	.	G	A	stop_gained	HIGH	MRPL37
8	29121994	.	A	T	stop_gained	HIGH	MCCC2L
8	5839323	.	G	A	stop_gained	HIGH	NUF2
8	4073744	.	T	C	splice_acceptor_variant&intron_variant	HIGH	RGS5
8	5143295	.	C	G	splice_acceptor_variant&intron_variant	HIGH	PRRC2C
8	20047175	.	T	G	splice_acceptor_variant&intron_variant	HIGH	ELOVL1
8	24907286	.	A	G	start_lost	HIGH	PODN
8	3040895	.	C	A	splice_acceptor_variant&intron_variant	HIGH	ENSGALG00000002431
8	313288	.	T	G	stop_lost	HIGH	ENSGALG00000050467
8	29370626	.	T	C	splice_donor_variant&intron_variant	HIGH	SRSF11
8	29370625	.	G	A	splice_donor_variant&intron_variant	HIGH	SRSF11
9	12843824	.	G	A	splice_acceptor_variant&intron_variant	HIGH	PPP1R2
9	10216262	.	C	T	splice_donor_variant&intron_variant	HIGH	TRIP12
9	5667404	.	C	T	splice_donor_variant&intron_variant	HIGH	PER2
9	15104274	.	G	A	splice_acceptor_variant&intron_variant	HIGH	TFRC
9	10979433	.	T	A	splice_donor_variant&intron_variant	HIGH	SLC9A9
9	12986198	.	C	G	stop_gained	HIGH	LSG1
9	20744327	.	C	T	start_lost	HIGH	SERPINI1
9	13093609	.	C	A	splice_donor_variant&intron_variant	HIGH	HES1
9	15056915	.	G	C	splice_donor_variant&intron_variant	HIGH	PCYT1A
9	18342510	.	C	T	splice_acceptor_variant&intron_variant	HIGH	ENSGALG00000051388
9	20770483	.	A	T	splice_acceptor_variant&intron_variant	HIGH	PDCD10
9	21009722	.	A	G	splice_donor_variant&intron_variant	HIGH	ENSGALG00000052663
9	22843693	.	A	C	stop_gained	HIGH	ENSGALG00000020626
9	18189018	.	C	T	splice_donor_variant&intron_variant	HIGH	ENSGALG00000053045
9	15399738	.	G	A	splice_donor_variant&intron_variant	HIGH	ARMC9
9	8476115	.	C	T	splice_donor_variant&intron_variant	HIGH	SERPINE2
9	8476114	.	A	T	splice_donor_variant&intron_variant	HIGH	SERPINE2
9	6034248	.	G	T	stop_gained	HIGH	MRPS22
9	16362319	.	G	A	stop_gained	HIGH	RFC4
9	4534840	.	G	C	splice_donor_variant&intron_variant	HIGH	ENSGALG00000006564
9	15434161	.	C	T	splice_acceptor_variant&intron_variant	HIGH	NCL
9	23797361	.	C	G	splice_donor_variant&intron_variant	HIGH	EIF2A
9	20683154	.	G	A	splice_donor_variant&intron_variant	HIGH	GOLIM4
9	22922403	.	C	T	splice_donor_variant&intron_variant	HIGH	ENSGALG00000052525
9	16104092	.	G	A	splice_donor_variant&intron_variant	HIGH	POLR2H
9	2402753	.	T	C	stop_lost	HIGH	PLEKHB2
9	2402763	.	G	A	stop_gained	HIGH	PLEKHB2
9	20008995	.	C	T	stop_gained	HIGH	PHC3
10	11186838	.	G	A	start_lost	HIGH	SPPL2A
10	20579327	.	C	G	splice_donor_variant&intron_variant	HIGH	PDIA3
10	1133083	.	C	A	splice_acceptor_variant&intron_variant	HIGH	ENSGALG00000052177
10	16265572	.	T	G	splice_donor_variant&intron_variant	HIGH	NR2F2
10	1530485	.	T	G	splice_acceptor_variant&intron_variant	HIGH	SORD
10	1530484	.	C	T	splice_acceptor_variant&intron_variant	HIGH	SORD
10	9133545	.	A	G	start_lost	HIGH	FAM214A
10	11114240	.	T	G	stop_gained	HIGH	ENSGALG00000005682
10	8473292	.	G	T	stop_gained	HIGH	RSL24D1
10	12618430	.	G	A	splice_donor_variant&intron_variant	HIGH	ENSGALG00000034021
10	8412688	.	T	G	splice_acceptor_variant&intron_variant	HIGH	CCPG1
10	3078872	.	T	C	start_lost	HIGH	ENSGALG00000045534
10	1095055	.	A	G	stop_lost	HIGH	ENSGALG00000046049
10	8131766	.	C	T	splice_donor_variant&intron_variant	HIGH	TEX9
11	715013	.	A	C	splice_donor_variant&intron_variant	HIGH	FAM192A
11	9807791	.	C	T	splice_donor_variant&intron_variant	HIGH	ENSGALG00000049995
11	11188310	.	C	T	splice_acceptor_variant&intron_variant	HIGH	ENSGALG00000038923
11	2652885	.	C	A	stop_gained	HIGH	ENSGALG00000044466
11	18779498	.	C	G	splice_acceptor_variant&intron_variant	HIGH	FANCA
11	19044970	.	G	A	start_lost	HIGH	WWP2
11	1812584	.	C	T	splice_donor_variant&intron_variant	HIGH	GLG1
11	17757760	.	A	C	splice_donor_variant&intron_variant	HIGH	KIAA0513
11	17781982	.	C	T	splice_donor_variant&intron_variant	HIGH	FBXO31
11	1091184	.	G	A	stop_gained	HIGH	RIPOR1
11	18420322	.	A	G	splice_donor_variant&intron_variant	HIGH	CYBA
11	1771612	.	G	A	stop_gained	HIGH	ENSGALG00000047215
11	11353834	.	T	C	splice_donor_variant&intron_variant	HIGH	DYNC1LI2
11	4829780	.	G	T	stop_gained	HIGH	FTO
11	719399	.	T	C	splice_donor_variant&intron_variant	HIGH	RSPRY1
11	3418888	.	G	C	splice_donor_variant&intron_variant	HIGH	DUS2
11	11378489	.	G	A	stop_gained	HIGH	DYNC1LI2
11	18526854	.	C	A	stop_gained	HIGH	CBFA2T3
12	7155517	.	C	T	splice_donor_variant&intron_variant	HIGH	FGD3
12	3066753	.	C	A	stop_gained	HIGH	RBM6
12	9007498	.	T	G	start_lost	HIGH	APPL1
12	977910	.	T	A	splice_acceptor_variant&intron_variant	HIGH	TNNC1
12	12050625	.	T	C	stop_lost	HIGH	DALRD3
12	12187651	.	A	G	start_lost	HIGH	RPP14
12	10148708	.	G	T	stop_gained	HIGH	MCM2
12	19714102	.	A	G	splice_donor_variant&intron_variant	HIGH	RAD18
12	3640934	.	C	T	stop_gained	HIGH	HYAL3
12	5516609	.	G	T	stop_gained	HIGH	GP9
12	3155068	.	G	A	stop_gained	HIGH	FANCD2
12	9213136	.	G	T	splice_acceptor_variant&intron_variant	HIGH	SLMAP
12	3914307	.	T	G	splice_donor_variant&intron_variant	HIGH	IARS1
12	9869331	.	C	A	stop_gained	HIGH	EEFSEC
12	19714103	.	C	T	splice_donor_variant&intron_variant	HIGH	RAD18
12	11931820	.	C	A	stop_gained	HIGH	ENSGALG00000046507
12	18946911	.	C	T	stop_gained	HIGH	ITPR1
12	9002476	.	T	C	splice_acceptor_variant&intron_variant	HIGH	HESX1
12	1216380	.	A	C	splice_acceptor_variant&intron_variant	HIGH	ENSGALG00000001697
12	3641071	.	G	A	stop_gained	HIGH	HYAL3
12	12188988	.	A	G	splice_donor_variant&intron_variant	HIGH	HTD2
12	12043749	.	G	A	stop_gained	HIGH	ENSGALG00000054244
12	11958549	.	C	G	splice_donor_variant&intron_variant	HIGH	ENSGALG00000043143
12	18862533	.	A	G	splice_donor_variant&intron_variant	HIGH	ITPR1
12	18862532	.	G	T	splice_donor_variant&intron_variant	HIGH	ITPR1
12	3003088	.	G	A	stop_gained	HIGH	MST1R
13	4598481	.	T	C	splice_donor_variant&intron_variant	HIGH	LCP2
13	17580068	.	C	T	splice_donor_variant&intron_variant	HIGH	ENSGALG00000042587
13	9845631	.	G	A	splice_donor_variant&intron_variant	HIGH	ERGIC1
13	11263290	.	A	T	splice_acceptor_variant&intron_variant	HIGH	SPINK5
13	4598480	.	G	A	splice_donor_variant&intron_variant	HIGH	LCP2
13	13847566	.	G	C	splice_donor_variant&intron_variant	HIGH	RPS14
13	14996960	.	A	G	start_lost	HIGH	PHYKPL
13	7444931	.	A	G	splice_donor_variant&intron_variant	HIGH	HMMR
13	18597547	.	G	A	splice_acceptor_variant&intron_variant	HIGH	TCERG1
13	14211071	.	T	A	stop_gained	HIGH	ENSGALG00000005924
13	18515645	.	C	T	splice_donor_variant&intron_variant	HIGH	LARS1
13	17561323	.	G	A	splice_donor_variant&intron_variant	HIGH	SLC22A5
13	1563934	.	C	G	splice_acceptor_variant&intron_variant	HIGH	ZMAT2
13	4026796	.	C	T	splice_donor_variant&intron_variant	HIGH	NPM1
13	9883950	.	T	A	stop_gained	HIGH	CREBRF
13	3521641	.	T	C	splice_donor_variant&intron_variant	HIGH	HSPA9
13	14213047	.	C	T	stop_gained	HIGH	ENSGALG00000021275
14	10441559	.	G	A	splice_donor_variant&intron_variant	HIGH	CARHSP1
14	6834243	.	T	C	splice_donor_variant&intron_variant	HIGH	TRAF7
14	8112005	.	C	T	splice_donor_variant&intron_variant	HIGH	ABCC6
14	13450730	.	A	G	splice_acceptor_variant&intron_variant	HIGH	RAB11FIP3
14	8719447	.	T	G	splice_acceptor_variant&intron_variant	HIGH	RPS15A
14	5472570	.	G	C	splice_donor_variant&intron_variant	HIGH	FLII
14	12407726	.	G	A	stop_gained&splice_region_variant	HIGH	RHBDF1
14	5103246	.	G	C	splice_donor_variant&intron_variant	HIGH	MPRIP
14	12322334	.	C	A	splice_donor_variant&intron_variant	HIGH	KIAA0556
14	2668011	.	C	A	splice_donor_variant&intron_variant	HIGH	CYP2W1
14	12894860	.	G	A	stop_gained	HIGH	CREBBP
14	13790898	.	T	A	stop_gained	HIGH	ENSGALG00000002067
14	7300276	.	G	A	splice_donor_variant&intron_variant	HIGH	PLK1
14	14292547	.	T	G	splice_acceptor_variant&intron_variant	HIGH	TBC1D24
14	8116887	.	T	A	stop_gained	HIGH	ENSGALG00000029360
14	6540084	.	C	G	splice_donor_variant&intron_variant	HIGH	RPS2
14	5564397	.	A	G	stop_lost&splice_region_variant	HIGH	SLC5A10
14	5564396	.	G	T	stop_lost&splice_region_variant	HIGH	SLC5A10
14	8896107	.	C	A	stop_gained	HIGH	TMC7
14	15241981	.	A	T	splice_acceptor_variant&intron_variant	HIGH	ENSGALG00000050337
15	3515913	.	G	A	stop_gained	HIGH	RIMBP2
15	10283993	.	A	G	start_lost	HIGH	ENSGALG00000053217
15	976702	.	G	C	splice_donor_variant&intron_variant	HIGH	CDC45
15	5363171	.	T	G	stop_lost	HIGH	ENSGALG00000051644
15	14540	.	G	A	stop_gained	HIGH	ENSGALG00000053479
15	11994003	.	G	T	stop_gained	HIGH	MED13L
15	7381294	.	T	A	stop_gained	HIGH	MYO18B
15	11401704	.	T	C	splice_donor_variant&intron_variant	HIGH	THOC5
15	2894734	.	C	G	splice_donor_variant&intron_variant	HIGH	EP400
15	11109347	.	T	C	splice_acceptor_variant&intron_variant	HIGH	CCDC157
15	6500983	.	G	A	splice_donor_variant&intron_variant	HIGH	ENSGALG00000031240
15	1079936	.	A	C	stop_lost	HIGH	GP1BB
15	356227	.	G	A	stop_gained	HIGH	CLTCL1
15	9724472	.	C	T	stop_gained	HIGH	RPLP0
15	7833898	.	C	A	splice_donor_variant&intron_variant	HIGH	PITPNB
15	7993649	.	A	G	start_lost	HIGH	CCDC117
15	7833341	.	C	T	splice_acceptor_variant&intron_variant	HIGH	PITPNB
15	5481579	.	T	A	stop_gained	HIGH	ENSGALG00000052952
15	6835640	.	C	T	splice_donor_variant&intron_variant	HIGH	CORO1C
15	4802062	.	G	A	splice_donor_variant&intron_variant	HIGH	DHX37
15	4802063	.	T	A	splice_donor_variant&intron_variant	HIGH	DHX37
15	4791202	.	A	G	splice_acceptor_variant&intron_variant	HIGH	DHX37
16	2272274	.	C	T	splice_donor_variant&intron_variant	HIGH	ENSGALG00000040101
16	506213	.	A	T	splice_acceptor_variant&intron_variant	HIGH	ENSGALG00000031066
16	2551089	.	C	T	splice_acceptor_variant&intron_variant	HIGH	BG1
16	2621553	.	G	A	splice_donor_variant&intron_variant	HIGH	C4
16	2434242	.	T	A	stop_gained	HIGH	ENSGALG00000046794
16	2575273	.	C	G	splice_donor_variant&intron_variant	HIGH	BRD2
16	1505225	.	C	G	stop_gained	HIGH	ENSGALG00000043671
16	2550271	.	G	A	stop_gained	HIGH	BG1
16	2575785	.	C	T	splice_acceptor_variant&intron_variant	HIGH	BRD2
16	2435747	.	C	T	splice_acceptor_variant&intron_variant	HIGH	ENSGALG00000046794
16	1110708	.	C	G	stop_gained	HIGH	ENSGALG00000054241
16	2607665	.	C	T	splice_donor_variant&intron_variant	HIGH	BF2
16	2083820	.	G	C	splice_acceptor_variant&intron_variant	HIGH	ENSGALG00000047627
16	2463510	.	G	A	splice_donor_variant&intron_variant	HIGH	ENSGALG00000049174
16	850687	.	C	G	stop_gained	HIGH	ENSGALG00000042708
17	9713501	.	G	A	splice_donor_variant&intron_variant	HIGH	ADGRD2
17	9713502	.	T	C	splice_donor_variant&intron_variant	HIGH	ADGRD2
17	10640539	.	G	T	stop_gained	HIGH	RALGPS1
17	5553403	.	C	T	stop_gained	HIGH	SPTAN1
17	8609224	.	A	T	stop_gained	HIGH	C5
17	1925898	.	T	A	splice_donor_variant&intron_variant	HIGH	RPL12
17	1912384	.	A	T	splice_donor_variant&intron_variant	HIGH	LRSAM1
17	1925897	.	G	T	splice_donor_variant&intron_variant	HIGH	RPL12
17	5193240	.	C	T	stop_gained	HIGH	NAIF1
17	5472449	.	G	C	stop_lost	HIGH	ENSGALG00000042325
17	5349459	.	G	A	stop_gained	HIGH	SLC27A4
17	6788904	.	G	A	stop_gained	HIGH	SETX
17	607752	.	C	T	stop_gained	HIGH	ENSGALG00000041514
17	629844	.	C	A	stop_gained	HIGH	ENSGALG00000033920
17	8899083	.	C	T	stop_gained	HIGH	DAB2IP
17	7158216	.	A	G	splice_donor_variant&intron_variant	HIGH	SURF6
17	867433	.	C	T	splice_donor_variant&intron_variant	HIGH	EXFABP
17	7343564	.	A	G	start_lost	HIGH	SARDH
18	6265527	.	G	A	splice_acceptor_variant&intron_variant	HIGH	DGKE
18	2169377	.	G	T	stop_gained	HIGH	STX8
18	9323440	.	C	T	splice_donor_variant&intron_variant	HIGH	BAIAP2
18	9521439	.	C	T	splice_donor_variant&intron_variant	HIGH	RNF213
18	7055127	.	C	G	splice_acceptor_variant&intron_variant	HIGH	NOL11
18	4231626	.	C	G	splice_acceptor_variant&intron_variant	HIGH	MFSD11
18	9537933	.	A	G	stop_lost&splice_region_variant	HIGH	SLC26A11
18	9257394	.	T	C	splice_donor_variant&intron_variant	HIGH	TEPSIN
18	10416056	.	G	A	stop_gained	HIGH	ENSGALG00000019755
18	10712533	.	A	G	splice_donor_variant&intron_variant	HIGH	GGA3
18	10336116	.	C	T	start_lost	HIGH	MYCBPAP
18	10325385	.	A	T	splice_donor_variant&intron_variant	HIGH	MYCBPAP
18	10325386	.	C	G	splice_donor_variant&intron_variant	HIGH	MYCBPAP
18	10522267	.	C	T	stop_gained	HIGH	FDXR
18	4368530	.	G	A	splice_acceptor_variant&intron_variant	HIGH	RHBDF2
19	5813573	.	T	C	splice_donor_variant&intron_variant	HIGH	SLC13A2
19	5111196	.	T	C	start_lost	HIGH	CRCP
19	2801404	.	A	C	splice_donor_variant&intron_variant	HIGH	NCF1C
19	262927	.	T	C	start_lost	HIGH	ENSGALG00000041833
19	6843366	.	T	A	splice_acceptor_variant&intron_variant	HIGH	ENSGALG00000055056
19	832376	.	C	T	stop_gained	HIGH	MTMR4
19	4660427	.	C	T	splice_acceptor_variant&intron_variant	HIGH	LIG3
19	6732754	.	C	T	splice_donor_variant&intron_variant	HIGH	ENSGALG00000004509
19	9504790	.	G	A	stop_gained	HIGH	TNFAIP1
19	5798714	.	G	A	stop_gained	HIGH	ENSGALG00000003595
19	4436017	.	C	T	splice_donor_variant&intron_variant	HIGH	MDH2
19	9461689	.	A	G	start_lost	HIGH	TNFAIP1
19	7148621	.	A	C	splice_donor_variant&intron_variant	HIGH	ENSGALG00000037314
19	10060071	.	C	T	stop_gained	HIGH	SMTNL2
19	4525393	.	G	T	splice_donor_variant&intron_variant	HIGH	MMP28
19	3392106	.	A	G	splice_acceptor_variant&intron_variant	HIGH	ZZEF1
19	5071432	.	A	G	splice_donor_variant&intron_variant	HIGH	GUSB
19	9322522	.	A	T	splice_acceptor_variant&intron_variant	HIGH	ENSGALG00000005685
19	664238	.	C	A	stop_gained&splice_region_variant	HIGH	TSPOAP1
19	5071433	.	T	A	splice_donor_variant&intron_variant	HIGH	GUSB
20	9036714	.	A	C	stop_lost&splice_region_variant	HIGH	ENSGALG00000036838
20	10088366	.	T	C	splice_acceptor_variant&intron_variant	HIGH	PDRG1
20	9325695	.	G	A	splice_acceptor_variant&intron_variant	HIGH	ENSGALG00000049365
20	6627742	.	T	C	splice_acceptor_variant&intron_variant	HIGH	ENSGALG00000042613
20	10505919	.	G	T	stop_gained	HIGH	ENSGALG00000003575
20	5082256	.	A	G	splice_acceptor_variant&splice_donor_variant&intron_variant	HIGH	ENSGALG00000044684
20	662704	.	A	C	stop_gained	HIGH	RBL1
20	5339732	.	G	C	stop_gained	HIGH	ENSGALG00000023844
20	9773780	.	T	C	splice_acceptor_variant&intron_variant	HIGH	STK35
20	1036414	.	T	A	splice_donor_variant&intron_variant	HIGH	RBM39
20	11588578	.	T	C	splice_donor_variant&intron_variant	HIGH	ENSGALG00000053536
20	9805564	.	C	G	stop_gained	HIGH	SIRPA
20	9788820	.	G	C	stop_gained	HIGH	ENSGALG00000006152
20	9983853	.	C	G	stop_gained	HIGH	REM1
20	6870582	.	T	C	splice_donor_variant&intron_variant	HIGH	FAM217B
20	254840	.	T	C	splice_acceptor_variant&intron_variant	HIGH	EPB41L1
20	7688514	.	G	A	stop_gained	HIGH	TAF4
20	4937728	.	A	G	splice_donor_variant&intron_variant	HIGH	ZHX3
21	3229870	.	T	C	splice_acceptor_variant&intron_variant	HIGH	ENO1
21	3260171	.	C	A	splice_acceptor_variant&intron_variant	HIGH	GPR157
21	5664521	.	C	T	stop_gained	HIGH	ENSGALG00000004646
21	2370641	.	T	G	splice_acceptor_variant&intron_variant	HIGH	PUSL1
21	3269458	.	A	T	splice_donor_variant&intron_variant	HIGH	GPR157
21	2370640	.	C	A	splice_acceptor_variant&intron_variant	HIGH	PUSL1
21	3269459	.	C	T	splice_donor_variant&intron_variant	HIGH	GPR157
21	4310920	.	A	C	splice_donor_variant&intron_variant	HIGH	ZBTB17
21	1991434	.	G	A	splice_donor_variant&intron_variant	HIGH	NADK
21	6551163	.	C	T	splice_donor_variant&intron_variant	HIGH	HSPG2
22	1419776	.	A	C	splice_acceptor_variant&intron_variant	HIGH	TNFRSF10B
22	1419247	.	C	T	stop_gained	HIGH	TNFRSF10B
22	2753055	.	G	A	splice_donor_variant&intron_variant	HIGH	ADAM9
22	3732435	.	C	T	splice_donor_variant&intron_variant	HIGH	CNNM4
22	4006030	.	G	A	stop_gained	HIGH	ENSGALG00000046731
22	1418711	.	C	T	stop_gained	HIGH	TNFRSF10B
22	3056242	.	G	A	splice_donor_variant&intron_variant	HIGH	VDAC3
22	3822955	.	C	A	stop_gained	HIGH	STAMBP
22	101413	.	G	A	stop_gained	HIGH	ENSGALG00000038207
22	1667872	.	T	C	splice_acceptor_variant&intron_variant	HIGH	XPO7
22	1667871	.	G	C	splice_acceptor_variant&intron_variant	HIGH	XPO7
23	2303820	.	A	G	splice_acceptor_variant&intron_variant	HIGH	ENSGALG00000054143
23	3394351	.	A	T	splice_donor_variant&intron_variant	HIGH	STMN1
23	1899934	.	G	T	splice_donor_variant&intron_variant	HIGH	ZDHHC18
23	5894008	.	G	C	splice_donor_variant&intron_variant	HIGH	NIPAL3
23	3897366	.	C	A	stop_gained	HIGH	ENSGALG00000001996
23	2300119	.	G	C	splice_acceptor_variant&intron_variant	HIGH	ENSGALG00000042485
23	4491309	.	A	C	stop_lost	HIGH	IFI27L2
23	4490501	.	C	T	stop_gained	HIGH	IFI27L2
23	5715622	.	T	C	splice_donor_variant&intron_variant	HIGH	RPL11
23	5715621	.	G	T	splice_donor_variant&intron_variant	HIGH	RPL11
24	4298404	.	C	T	stop_gained	HIGH	ENSGALG00000052833
24	2588741	.	C	A	stop_gained	HIGH	THYN1
24	433881	.	G	C	splice_acceptor_variant&intron_variant	HIGH	SRPRA
24	6170102	.	G	A	splice_donor_variant&intron_variant	HIGH	IL18
24	5841386	.	C	T	splice_donor_variant&intron_variant	HIGH	NCAM1
24	5704795	.	C	A	stop_gained	HIGH	PHLDB1
25	226110	.	G	A	stop_gained	HIGH	PRUNE1
25	2563766	.	C	T	stop_gained	HIGH	ARHGEF11
25	2924899	.	G	A	splice_donor_variant&intron_variant	HIGH	ATP8B2
25	169736	.	A	G	splice_donor_variant&intron_variant	HIGH	CTSS
25	3705799	.	G	A	stop_gained	HIGH	ENSGALG00000043416
25	3622279	.	G	T	splice_donor_variant&intron_variant	HIGH	ENSGALG00000014643
25	3350487	.	C	A	splice_donor_variant&intron_variant	HIGH	ILF2
25	1426838	.	G	A	stop_gained	HIGH	ENSGALG00000052849
25	3761520	.	C	A	splice_acceptor_variant&intron_variant	HIGH	ENSGALG00000040336
25	162420	.	A	C	splice_acceptor_variant&intron_variant	HIGH	SSR2
25	473280	.	T	A	splice_donor_variant&intron_variant	HIGH	DEDD
25	2873746	.	A	C	stop_lost	HIGH	TPM3
25	473279	.	G	A	splice_donor_variant&intron_variant	HIGH	DEDD
25	2446395	.	C	T	stop_gained	HIGH	VANGL2
26	2653189	.	C	T	stop_gained	HIGH	ENSGALG00000031149
26	2622501	.	C	T	stop_gained	HIGH	PFKFB2
26	572621	.	T	G	stop_lost	HIGH	KDM5B
26	5550382	.	T	C	splice_acceptor_variant&intron_variant	HIGH	QPRT
26	5070705	.	G	A	splice_donor_variant&intron_variant	HIGH	TAF8
26	3919626	.	A	T	splice_donor_variant&intron_variant	HIGH	CSDE1
26	2282613	.	A	C	splice_donor_variant&intron_variant	HIGH	RAB29
26	3919627	.	C	T	splice_donor_variant&intron_variant	HIGH	CSDE1
26	2598120	.	C	T	stop_gained	HIGH	ENSGALG00000049589
26	2282653	.	C	T	stop_gained	HIGH	RAB29
26	4097521	.	A	T	splice_donor_variant&intron_variant	HIGH	PPARD
26	3288987	.	G	C	stop_lost&splice_region_variant	HIGH	TRAF3IP3
26	1734543	.	G	T	splice_donor_variant&intron_variant	HIGH	GOLT1A
26	4111778	.	C	T	stop_gained	HIGH	DEF6
26	4741862	.	A	G	stop_lost	HIGH	TREM-B1
27	2410728	.	G	A	stop_gained	HIGH	ENSGALG00000048697
27	2628863	.	C	T	stop_gained	HIGH	ENSGALG00000047069
27	6593645	.	G	T	stop_gained	HIGH	NPEPPS
27	6935723	.	A	G	splice_donor_variant&intron_variant	HIGH	FBXL20
27	6594773	.	C	T	splice_acceptor_variant&intron_variant	HIGH	NPEPPS
27	5130885	.	G	A	splice_donor_variant&intron_variant	HIGH	DCAF7
27	7535358	.	G	T	splice_donor_variant&intron_variant	HIGH	ACLY
27	6916626	.	T	C	splice_acceptor_variant&intron_variant	HIGH	CACNB1
27	4050118	.	G	T	stop_gained	HIGH	SCN4A
27	7937523	.	C	T	splice_acceptor_variant&intron_variant	HIGH	VAT1
27	5462506	.	A	G	stop_lost&splice_region_variant	HIGH	ENSGALG00000054154
27	3974748	.	A	G	splice_donor_variant&intron_variant	HIGH	GRN
27	5408491	.	G	A	stop_gained	HIGH	RUNDC3A
27	3689758	.	A	G	splice_donor_variant&intron_variant	HIGH	EFTUD2
27	7526014	.	C	T	splice_donor_variant&intron_variant	HIGH	ACLY
28	3611526	.	C	G	splice_donor_variant&intron_variant	HIGH	MAU2
28	1493537	.	C	T	stop_gained	HIGH	FSD1
28	3301190	.	G	A	splice_acceptor_variant&intron_variant	HIGH	RPS15
28	3344618	.	A	C	splice_donor_variant&intron_variant	HIGH	THOP1
28	3341417	.	T	C	splice_acceptor_variant&intron_variant	HIGH	THOP1
28	3870234	.	T	A	splice_donor_variant&intron_variant	HIGH	ENSGALG00000051484
28	1081707	.	G	A	stop_gained	HIGH	APBA3
28	2754518	.	A	G	splice_acceptor_variant&intron_variant	HIGH	ENSGALG00000001317
28	1836876	.	T	G	splice_donor_variant&intron_variant	HIGH	ENSGALG00000049825
28	3767618	.	G	A	splice_donor_variant&intron_variant	HIGH	SUGP2
28	1081721	.	G	T	stop_gained	HIGH	APBA3
28	3290674	.	G	A	splice_acceptor_variant&intron_variant	HIGH	DAZAP1
28	2312037	.	A	G	start_lost	HIGH	ENSGALG00000014589
28	1125058	.	A	T	stop_gained	HIGH	PIP5K1C
28	2909674	.	G	A	splice_donor_variant&intron_variant	HIGH	PTBP1
28	1750271	.	T	C	start_lost	HIGH	ACSBG2
28	1755928	.	T	G	splice_donor_variant&intron_variant	HIGH	ACSBG2
28	935985	.	C	T	splice_donor_variant&intron_variant	HIGH	RAB11B
28	4030211	.	C	T	splice_acceptor_variant&intron_variant	HIGH	ELL
28	1148207	.	T	C	start_lost	HIGH	GIPC3
28	3035956	.	A	G	splice_acceptor_variant&intron_variant	HIGH	GPX4
30	555454	.	A	G	splice_acceptor_variant&intron_variant	HIGH	ENSGALG00000046971
30	901161	.	G	A	stop_gained	HIGH	NDUFB7
30	669229	.	A	T	stop_lost&splice_region_variant	HIGH	C3
30	475819	.	G	A	splice_donor_variant&intron_variant	HIGH	PGLS
30	661327	.	A	G	splice_acceptor_variant&intron_variant	HIGH	C3
30	246599	.	G	A	splice_acceptor_variant&intron_variant	HIGH	TRAPPC5
31	3842101	.	A	T	splice_acceptor_variant&intron_variant	HIGH	ENSGALG00000050820
31	5914436	.	C	T	stop_gained	HIGH	ENSGALG00000033375
31	4444535	.	G	A	stop_gained	HIGH	ENSGALG00000053734
31	4896547	.	A	G	splice_acceptor_variant&intron_variant	HIGH	ENSGALG00000047281
31	3027913	.	C	A	splice_donor_variant&intron_variant	HIGH	ENSGALG00000049114
31	5741625	.	T	C	start_lost	HIGH	CHIR-B6
31	2810075	.	T	C	start_lost	HIGH	ENSGALG00000047431
31	4043916	.	T	C	start_lost	HIGH	ENSGALG00000049317
32	282748	.	C	A	stop_gained	HIGH	TGFB1
32	412348	.	T	C	stop_lost	HIGH	ENSGALG00000037896
32	295087	.	G	A	stop_gained	HIGH	HNRNPUL1
33	7192126	.	T	C	stop_lost&splice_region_variant	HIGH	TNS2
33	7736005	.	C	T	stop_gained	HIGH	COPZ1
33	4876466	.	G	A	splice_acceptor_variant&intron_variant	HIGH	ENSGALG00000053167
33	7352189	.	A	G	splice_acceptor_variant&intron_variant	HIGH	C12orf10
33	7223141	.	G	A	stop_gained	HIGH	ZNF740
33	6345130	.	G	A	splice_donor_variant&intron_variant	HIGH	CCS
33	6629948	.	A	G	splice_acceptor_variant&intron_variant	HIGH	FAU
33	6340977	.	G	T	stop_gained	HIGH	ENSGALG00000053244
33	6691230	.	C	T	splice_donor_variant&intron_variant	HIGH	KCNC3
33	7280877	.	C	T	stop_gained	HIGH	SENP1
33	6734161	.	T	G	splice_donor_variant&intron_variant	HIGH	RUVBL2
33	6734162	.	A	C	splice_donor_variant&intron_variant	HIGH	RUVBL2

## Sheet: Kashmiri_HighImpactInDels
Chr	Chr_location	DB_SNP ID	Ref Nucleotide	Mutated Nucleotide	SNP Nature	Impact	Gene
1	138960898	.	AACTTAC	AACTTACTTAC	frameshift_variant&stop_gained&splice_region_variant	HIGH	MCF2L
1	19019154	.	C	CATCA	frameshift_variant	HIGH	ZBED4
1	20569153	.	CG	CGG	frameshift_variant&splice_region_variant	HIGH	MAPK11
1	7161572	.	T	TC	frameshift_variant	HIGH	CCDC3
1	135244746	.	AGG	AGGG	frameshift_variant	HIGH	IL18RAP
1	197401191	.	TGGGG	TGGGGG	frameshift_variant	HIGH	SMPD1
1	7252458	.	GCCC	GCCCC	frameshift_variant	HIGH	MCM10
1	6895882	.	C	CG	frameshift_variant	HIGH	CDC123
1	7161570	.	GTTT	GTTTT	frameshift_variant	HIGH	CCDC3
1	51496681	.	AT	ATT	frameshift_variant	HIGH	KCTD17
1	19019204	.	TGGG	TGG	frameshift_variant	HIGH	ZBED4
1	135185742	.	A	AG	frameshift_variant&splice_region_variant	HIGH	IL1RL1
1	92856913	.	A	AG	frameshift_variant&start_lost	HIGH	ENSGALG00000053194
1	131765737	.	GAAAAAAAAA	GAAAAAAAAAA,GAAAAAAAA	frameshift_variant&splice_region_variant	HIGH	NIPA1
1	93654056	.	AGG	AGGG	splice_acceptor_variant&splice_donor_variant&intron_variant	HIGH	ADPRH
1	7244508	.	AC	ACC	frameshift_variant	HIGH	OPTN
1	135185740	.	TAAA	TAAAA	frameshift_variant&splice_region_variant	HIGH	IL1RL1
1	20667275	.	GA	GAA	frameshift_variant	HIGH	PLXNB2
1	12646277	.	G	GT	splice_donor_variant&intron_variant	HIGH	TMEM60
1	6849040	.	TC	TCC	splice_acceptor_variant&intron_variant	HIGH	SEC61A2
1	54583654	.	GAAAAAAAA	GGAAAAAAAAA	splice_donor_variant&intron_variant	HIGH	ENSGALG00000054571
1	56625416	.	GAT	G	frameshift_variant	HIGH	ENSGALG00000034511
1	146351623	.	CTGCTTG	CTG	frameshift_variant	HIGH	FARP1
1	127792975	.	CGT	C	frameshift_variant	HIGH	STS
1	142553972	.	ATG	A	frameshift_variant	HIGH	EFNB2
1	38383748	.	GACA	GA	frameshift_variant	HIGH	E2F7
1	6742986	.	A	AG	frameshift_variant&start_lost	HIGH	ENSGALG00000055058
1	197027680	.	CT	CTT	splice_acceptor_variant&splice_donor_variant&intron_variant	HIGH	ENSGALG00000051726
1	75876130	.	GCCC	GCCCC	splice_acceptor_variant&splice_donor_variant&intron_variant	HIGH	PHC1
1	194407894	.	GAA	GAAA	splice_acceptor_variant&intron_variant	HIGH	RSF1
1	7276448	.	G	GA	splice_donor_variant&intron_variant	HIGH	PHYH
1	111656497	.	CAAA	CAAAA	frameshift_variant	HIGH	GATD3A
1	77659776	.	GAA	GAAA	frameshift_variant	HIGH	ENSGALG00000046776
1	20569152	.	AC	ACC	frameshift_variant&splice_region_variant	HIGH	MAPK11
1	80201049	.	CT	CTT	frameshift_variant&splice_region_variant	HIGH	METTL16
1	170683602	.	CGCCGAGCCGAGCCGAGCCG	CGCCGAGCCGAGCCGAGCCGAGCCG	frameshift_variant	HIGH	SPRYD7
1	6743822	.	C	CG	frameshift_variant	HIGH	ENSGALG00000055058
1	77575273	.	C	CA	frameshift_variant	HIGH	SCNN1A
1	71798650	.	AGGG	AGGGG	frameshift_variant	HIGH	MANSC1
1	195126459	.	GCTCTCTCT	GCTCTCT	frameshift_variant	HIGH	ENSGALG00000038551
1	79922268	.	C	CA	frameshift_variant	HIGH	GDAP2
1	80037560	.	AGG	AGGG	frameshift_variant&splice_region_variant	HIGH	USF3
1	23025818	.	GAAAAAA	GAA	frameshift_variant	HIGH	AASS
1	1721106	.	ATCTCT	ATCT	frameshift_variant	HIGH	TASOR2
1	1115933	.	GCCCC	GCC	frameshift_variant&splice_region_variant	HIGH	DENND6B
1	7258589	.	TCCC	TCCCC	splice_acceptor_variant&intron_variant	HIGH	MCM10
1	88748638	.	CTGTG	CTG	frameshift_variant	HIGH	IFT57
1	124187056	.	TACAAGACA	TACA	frameshift_variant	HIGH	ENSGALG00000054387
1	135222660	.	TCC	TCCC	frameshift_variant	HIGH	IL18R1
1	129763921	.	C	CG	splice_acceptor_variant&splice_donor_variant&intron_variant	HIGH	ARSH
1	129759904	.	AT	ATT	splice_acceptor_variant&splice_donor_variant&intron_variant	HIGH	ARSH
1	49437216	.	TG	TGG	frameshift_variant	HIGH	WBP2NL
1	67832295	.	AGT	A	frameshift_variant	HIGH	ITPR2
1	19015876	.	CGAG	CG	frameshift_variant	HIGH	ZBED4
1	88781726	.	CTG	C	frameshift_variant	HIGH	MYH15
1	145978593	.	TGC	T	frameshift_variant	HIGH	ENSGALG00000043947
1	7276447	.	AGG	AGGG	splice_donor_variant&intron_variant	HIGH	PHYH
1	197044340	.	GCC	GCCC	frameshift_variant	HIGH	NUP98
1	15408472	.	ACCCC	ACCC	frameshift_variant&splice_region_variant	HIGH	ABCD2
1	79953664	.	G	GT	frameshift_variant&splice_region_variant	HIGH	FAM46C
1	111402085	.	G	GA	frameshift_variant&splice_region_variant	HIGH	PDXK
1	19019152	.	CCC	CCCATCC	frameshift_variant	HIGH	ZBED4
1	194425670	.	A	AG	frameshift_variant	HIGH	RSF1
1	54583652	.	AGG	AGGG	splice_donor_variant&intron_variant	HIGH	ENSGALG00000054571
1	80504543	.	CAA	CAAA	frameshift_variant	HIGH	GTF2E1
1	111656496	.	GC	GCC	frameshift_variant&splice_region_variant	HIGH	GATD3A
1	50812527	.	TC	TCC	frameshift_variant	HIGH	SUN2
1	14689272	.	GAC	G	frameshift_variant	HIGH	HBP1
1	28575251	.	CTTTTTTTT	CTTTTTTT	frameshift_variant	HIGH	THAP5
1	194407896	.	AG	AGG	frameshift_variant&splice_region_variant	HIGH	RSF1
1	4803302	.	CTTT	CTTTT	frameshift_variant	HIGH	KIN
1	20570486	.	GC	GCC	frameshift_variant&splice_region_variant	HIGH	MAPK11
1	20667276	.	A	AG	frameshift_variant	HIGH	PLXNB2
1	135244747	.	G	GT	frameshift_variant	HIGH	IL18RAP
1	80145093	.	GCC	GC	frameshift_variant	HIGH	TRIM45
1	20492483	.	TAGAG	TAGAGAG	frameshift_variant	HIGH	HDAC10
1	55372051	.	CTAT	CT	frameshift_variant&stop_lost	HIGH	PARPBP
1	75776312	.	AC	ACC	frameshift_variant	HIGH	ENSGALG00000036447
1	197030597	.	CG	CGG	frameshift_variant	HIGH	ENSGALG00000049536
1	106583221	.	GAA	GAAA	frameshift_variant	HIGH	IFNAR2
1	15408476	.	CT	C	frameshift_variant&splice_region_variant	HIGH	ABCD2
1	77650331	.	A	AC	frameshift_variant	HIGH	ENSGALG00000037807
1	20285062	.	C	CT	frameshift_variant	HIGH	MOV10L1
1	129763055	.	CTT	CTTT	splice_acceptor_variant&splice_donor_variant&intron_variant	HIGH	ARSH
1	170148854	.	TAA	TA	splice_acceptor_variant&intron_variant	HIGH	RB1
1	77654083	.	CT	CTT	frameshift_variant	HIGH	ENSGALG00000037807
1	20570487	.	CTT	CTTT	frameshift_variant	HIGH	MAPK11
2	76268951	.	TA	TAA	splice_donor_variant&intron_variant	HIGH	OTULIN
2	35429	.	C	CT	frameshift_variant	HIGH	ENSGALG00000047569
2	98607880	.	TC	TCC	splice_acceptor_variant&intron_variant	HIGH	ENSGALG00000052012
2	149441507	.	GCCCC	GCCCCC	splice_acceptor_variant&splice_donor_variant&intron_variant	HIGH	PUF60
2	16090618	.	TCCCCCCC	TCCCCCCCC	splice_acceptor_variant&splice_donor_variant&intron_variant	HIGH	ABI1
2	128007029	.	TC	TCC	frameshift_variant	HIGH	ENSGALG00000041179
2	112076684	.	CT	CTT	frameshift_variant&splice_region_variant	HIGH	NSMAF
2	115316684	.	A	AG	frameshift_variant&splice_region_variant	HIGH	COPS5
2	112945505	.	GTTT	GTTTT	frameshift_variant	HIGH	CHD7
2	116757213	.	AG	AGG	frameshift_variant	HIGH	LACTB2
2	116343048	.	GA	GAA	frameshift_variant	HIGH	SULF1
2	343612	.	ACCC	ACCCC	frameshift_variant	HIGH	ABCB8
2	81138571	.	CGA	C	frameshift_variant	HIGH	COBL
2	112995268	.	C	CT	frameshift_variant&splice_region_variant	HIGH	CHD7
2	6847121	.	TGCCAG	TG	frameshift_variant	HIGH	XRCC2
2	103402556	.	ATACTTTACT	ATACT	frameshift_variant	HIGH	ENSGALG00000053770
2	111093434	.	ACC	ACCC	frameshift_variant&splice_region_variant	HIGH	TGS1
2	149445740	.	CA	CAA	splice_acceptor_variant&splice_donor_variant&intron_variant	HIGH	PUF60
2	322535	.	CGG	CG	frameshift_variant	HIGH	SLC4A2
2	34856	.	C	CGG	frameshift_variant	HIGH	ENSGALG00000047569
2	112995267	.	A	AG	splice_acceptor_variant&splice_donor_variant&intron_variant	HIGH	CHD7
2	464546	.	CGGTAAGG	CGG	frameshift_variant	HIGH	ZNF467
2	120916464	.	T	TC	frameshift_variant	HIGH	ENSGALG00000034376
2	124174650	.	TTCT	TT	frameshift_variant	HIGH	RIPK2
2	111093501	.	AGG	AGGG	frameshift_variant&splice_region_variant	HIGH	TGS1
2	42232287	.	CTATAT	CTAT	frameshift_variant	HIGH	DNAJC13
2	137071930	.	CGAG	CG	frameshift_variant	HIGH	SNTB1
2	19471574	.	AT	A	frameshift_variant	HIGH	ENSGALG00000027765
2	111093433	.	GA	GAA	frameshift_variant&splice_region_variant	HIGH	TGS1
2	111093504	.	A	AG	frameshift_variant&splice_region_variant	HIGH	TGS1
2	128294219	.	CTT	CTTT	frameshift_variant	HIGH	POLR2K
2	78221549	.	CC	CCTC,CCTCCTC	frameshift_variant	HIGH	ANKRD33B
2	107917446	.	TC	TCC	splice_acceptor_variant&splice_donor_variant&intron_variant	HIGH	PRKDC
2	88548988	.	ATTTTTT	ATTTTTTT	frameshift_variant	HIGH	CTNNAL1
2	98607878	.	ATT	ATTT	splice_acceptor_variant&intron_variant	HIGH	ENSGALG00000052012
2	99604850	.	T	TTG	frameshift_variant&splice_region_variant	HIGH	LAMA1
2	132547398	.	GCC	GCCC	frameshift_variant	HIGH	NUDCD1
2	6408487	.	AGCCGCTGCCGCTGCCGC	AGCCGCTGCCGC	splice_acceptor_variant&conservative_inframe_deletion&splice_region_variant&intron_variant	HIGH	PRKAG2
2	78261383	.	AGG	AGGG	frameshift_variant	HIGH	SNRNP48
2	115316683	.	CAA	CAAA	frameshift_variant&splice_region_variant	HIGH	COPS5
2	26785266	.	GTTTTT	GTTTTTT	splice_acceptor_variant&intron_variant	HIGH	SCIN
2	20840845	.	AGC	A	frameshift_variant&splice_acceptor_variant&splice_region_variant&intron_variant	HIGH	DBF4
2	128294216	.	A	AT	frameshift_variant	HIGH	POLR2K
2	128007028	.	CT	CTT	frameshift_variant	HIGH	ENSGALG00000041179
3	40767130	.	C	CTCCTCT	stop_gained&disruptive_inframe_insertion	HIGH	ENSGALG00000044278
3	88950	.	TGGC	TGGCGCGGC	frameshift_variant&start_lost	HIGH	PRORSD1P
3	104464992	.	CGGGGG	CGGGGGG	frameshift_variant	HIGH	ENSGALG00000052087
3	38462673	.	CGGG	CGGGG	frameshift_variant	HIGH	ENSGALG00000052326
3	16789531	.	A	AC	frameshift_variant	HIGH	MAP4K3
3	38559125	.	CTT	CTTT	frameshift_variant	HIGH	COA6
3	21899418	.	GC	GCC	splice_acceptor_variant&intron_variant	HIGH	TATDN3
3	57621722	.	G	GA	frameshift_variant&splice_region_variant	HIGH	ENSGALG00000035769
3	38462674	.	G	GT	frameshift_variant	HIGH	ENSGALG00000052326
3	40163438	.	GAAAAAAA	GAAAAAAAA	frameshift_variant	HIGH	TAF5L
3	38559126	.	T	TC	frameshift_variant	HIGH	COA6
3	88631037	.	GAA	G	frameshift_variant	HIGH	ANGPT2
3	17023345	.	CTGT	CT	frameshift_variant	HIGH	MCM8
3	52425612	.	AGCAGCAG	A	frameshift_variant	HIGH	PHACTR2
3	101344622	.	GATAT	GAT	frameshift_variant	HIGH	ENSGALG00000016475
3	56643421	.	CTATA	CTA	frameshift_variant	HIGH	ENSGALG00000053921
3	40788417	.	C	CA	splice_acceptor_variant&splice_donor_variant&intron_variant	HIGH	PDCD2
3	38547107	.	AC	ACC	frameshift_variant	HIGH	TARBP1
3	56870117	.	GT	GTT	frameshift_variant&splice_region_variant	HIGH	SLC18B1
3	16202610	.	ATTTTTTTTT	ATTTTTTT	frameshift_variant&stop_lost	HIGH	MRPS5
3	40788411	.	CGGGGG	CGGGGGG	frameshift_variant&splice_region_variant	HIGH	PDCD2
3	40102489	.	AATATAT	AATAT	frameshift_variant	HIGH	NUP133
3	57386915	.	CCAC	CC	frameshift_variant	HIGH	MED23
3	30795954	.	AGGG	AGGGG	frameshift_variant	HIGH	VEGFA
3	22050271	.	A	AG	frameshift_variant	HIGH	PACC1
3	101576601	.	CTTTTTTTTTTTTT	CTTTTTTTTTTTTTTT,CTTTTTTTTTTTTTTTT,CTTTTTTTTTTTTTTTTT	frameshift_variant	HIGH	ENSGALG00000051739
3	18168241	.	GCC	GC	frameshift_variant	HIGH	TAF1A
3	17138290	.	CAAAAAA	CAAAAAAA	frameshift_variant	HIGH	PARP1
3	38552291	.	GT	GTT	frameshift_variant&stop_gained	HIGH	TARBP1
3	38552292	.	TG	TGG	frameshift_variant	HIGH	TARBP1
3	40922747	.	TGGGGGGG	TGGGGGG	frameshift_variant	HIGH	DLL1
3	38281176	.	TAAAAAAAA	TAAAAAAAAA,TAAAAAAAAAA	splice_acceptor_variant&intron_variant	HIGH	RBM34
3	16512408	.	T	TG	frameshift_variant	HIGH	ENSGALG00000023506
3	104464927	.	CGGG	CGGGG	frameshift_variant	HIGH	ENSGALG00000052087
4	8712419	.	CT	CTT	frameshift_variant	HIGH	ENSGALG00000042151
4	57139101	.	CCT	CCTACT	stop_gained&conservative_inframe_insertion	HIGH	ALPK1
4	45301842	.	ACTC	ACTCCTCTC	frameshift_variant	HIGH	ANTXR2
4	90955629	.	AGGGGGG	AGGGGGGG	frameshift_variant	HIGH	WBP1
4	75878443	.	TAA	TAAA	frameshift_variant	HIGH	ENSGALG00000051383
4	85439584	.	CT	CTT	frameshift_variant	HIGH	ENSGALG00000038160
4	73391344	.	GC	GCC	frameshift_variant	HIGH	SEL1L3
4	69811427	.	T	TC	frameshift_variant&splice_region_variant	HIGH	PGM2
4	39894528	.	CCATCT	C	frameshift_variant	HIGH	WWC2
4	23877215	.	TTAT	TT	frameshift_variant	HIGH	KLHL2
4	45830411	.	GCTCTCT	GCTCT	frameshift_variant	HIGH	PTPN13
4	75880167	.	CAA	CAAA	frameshift_variant	HIGH	ENSGALG00000054173
4	85603739	.	AATATAT	AATATATAT	frameshift_variant&splice_region_variant	HIGH	ENSGALG00000015805
4	73376747	.	GCCCCCC	GCCCCCCC	frameshift_variant	HIGH	SEL1L3
4	3291154	.	GCGGCCCGGCCCGGCCC	GCGGCCCGGCCC	frameshift_variant	HIGH	WDR44
4	43811775	.	AACA	AA	splice_acceptor_variant&splice_region_variant&intron_variant	HIGH	ENSGALG00000050835
4	69279445	.	A	AT	frameshift_variant	HIGH	LIAS
4	5159065	.	TGG	TG	frameshift_variant	HIGH	TRMT12
4	38738929	.	CCGGCGCGGCGC	CCGGCGCGGCGCGGCGC	frameshift_variant	HIGH	PPA2
4	11360544	.	CTGCTT	CT	frameshift_variant	HIGH	ENSGALG00000007546
4	4339275	.	TGCAAGCAAG	TGCAAG	frameshift_variant	HIGH	HTATSF1
4	90972572	.	GGTGTG	GGTG	frameshift_variant&stop_lost	HIGH	ENSGALG00000054891
4	60068649	.	GCC	GCCC	frameshift_variant	HIGH	ENSGALG00000051538
4	75878445	.	A	AG	frameshift_variant	HIGH	ENSGALG00000051383
4	85439583	.	AC	ACC	frameshift_variant	HIGH	ENSGALG00000038160
4	69279444	.	GA	GAA	frameshift_variant	HIGH	LIAS
4	8712418	.	G	GT	frameshift_variant	HIGH	ENSGALG00000042151
4	1264240	.	TGG	TGGG	frameshift_variant	HIGH	ENSGALG00000028681
4	44937092	.	GAAAAAAA	GAAAAAA	frameshift_variant	HIGH	PAQR3
4	35952379	.	ATT	ATTT	frameshift_variant&stop_lost&splice_region_variant	HIGH	CCSER1
4	60068651	.	CGG	CGGG	frameshift_variant	HIGH	ENSGALG00000051538
4	90996670	.	GT	GTT	frameshift_variant	HIGH	ENSGALG00000041205
4	37163496	.	CAAAAA	CAAAAAA	frameshift_variant	HIGH	SMARCAD1
4	85439609	.	AGG	AGGG	frameshift_variant	HIGH	ENSGALG00000038160
4	85439610	.	G	GA	frameshift_variant	HIGH	ENSGALG00000038160
4	5158812	.	TGGGGGGG	TGGGGGG	frameshift_variant	HIGH	TRMT12
4	75880169	.	A	AG	frameshift_variant	HIGH	ENSGALG00000054173
4	73431261	.	AG	AGG	splice_acceptor_variant&splice_donor_variant&intron_variant	HIGH	SLC34A2
4	34949165	.	CA	CAA	frameshift_variant	HIGH	MRPL1
4	73391345	.	CTT	CTTT	frameshift_variant	HIGH	SEL1L3
4	16562954	.	TGGCGGGAGGCGGGAGGCG	TGGCGGGAGGCG	frameshift_variant	HIGH	SLC25A5
4	90996607	.	GCCCCCCCCCCCCCCCCCC	GCCCCCCCCCC	frameshift_variant	HIGH	ENSGALG00000052156
4	85603805	.	GAAAAAA	GAAAAAAA	frameshift_variant	HIGH	ENSGALG00000015805
5	58872528	.	GTAA	G	splice_donor_variant&splice_region_variant&intron_variant	HIGH	MIS18BP1
5	23352366	.	GCTCTC	GCTC	frameshift_variant&stop_lost	HIGH	NR1H3
5	31009645	.	ATC	ATCCTTC	splice_acceptor_variant&intron_variant	HIGH	ENSGALG00000052412
5	44316198	.	CAAAAAAAAAAAA	CAAAAAAAAAA,CAAAAAAAAAAA	frameshift_variant	HIGH	RPS6KA5
5	44316029	.	TAAAA	TAAA	frameshift_variant	HIGH	RPS6KA5
5	287386	.	CT	CTT	frameshift_variant	HIGH	ENSGALG00000043016
5	287385	.	GC	GCC	frameshift_variant	HIGH	ENSGALG00000043016
5	27244756	.	C	CA	splice_acceptor_variant&splice_donor_variant&intron_variant	HIGH	SIPA1L1
5	337862	.	C	CCTA,CG	frameshift_variant	HIGH	ENSGALG00000039648
5	478626	.	GCC	GCCC	frameshift_variant	HIGH	MYRF
5	256969	.	CGG	CGGG	frameshift_variant	HIGH	ENSGALG00000047864
5	16649594	.	AC	ACC	splice_acceptor_variant&splice_donor_variant&intron_variant	HIGH	LRP5
5	57761737	.	CATATATAA	CA	frameshift_variant	HIGH	POLE2
5	37784326	.	CCT	C	frameshift_variant&splice_region_variant	HIGH	SEC23A
5	37913400	.	GGTGT	GGT	frameshift_variant	HIGH	COQ6
5	26287837	.	CAGA	CA	frameshift_variant	HIGH	TMEM62
5	14615949	.	GGTGT	GGT	frameshift_variant	HIGH	BRSK1
5	38257003	.	GGAATAGA	GGA	frameshift_variant	HIGH	YLPM1
5	5785584	.	TAAAA	TAA	frameshift_variant	HIGH	ENSGALG00000012103
5	27244755	.	TC	TCC	splice_acceptor_variant&splice_donor_variant&intron_variant	HIGH	SIPA1L1
5	9988254	.	CG	C	frameshift_variant	HIGH	DENND2B
5	16649595	.	CT	CTT	splice_acceptor_variant&splice_donor_variant&intron_variant	HIGH	LRP5
5	279355	.	CGGGGG	CGGGGGG	frameshift_variant	HIGH	TMEM132A
5	18770740	.	T	TA	frameshift_variant&stop_lost	HIGH	NAT10
5	21966783	.	GC	GCC	frameshift_variant&splice_region_variant	HIGH	EXT2
5	15930693	.	TTGACTGAC	TTGAC	frameshift_variant	HIGH	CRACR2B
5	5786041	.	TTCT	TT	frameshift_variant	HIGH	ENSGALG00000012103
5	21966784	.	C	CG	frameshift_variant&splice_region_variant	HIGH	EXT2
5	265151	.	CG	CGG	splice_acceptor_variant&splice_donor_variant&intron_variant	HIGH	ZP1
5	16259692	.	AGG	AGGG	frameshift_variant	HIGH	ENSGALG00000039221
5	22242733	.	TGGG	TGGGG	splice_acceptor_variant&splice_donor_variant&intron_variant	HIGH	CD82
5	1079892	.	C	CG	frameshift_variant&splice_region_variant	HIGH	BAHD1
5	38340461	.	AAAAAGAAAAGAA	AAAAAGAA	frameshift_variant	HIGH	EIF2B2
5	23425940	.	TTTGC	TTTGCTTGC	splice_acceptor_variant&intron_variant	HIGH	PACSIN3
5	45039569	.	TGA	T	frameshift_variant	HIGH	GOLGA5
5	294251	.	CGG	CGGG	frameshift_variant	HIGH	VPS37C
5	24641968	.	G	GGA	frameshift_variant	HIGH	DLL4
5	263107	.	GC	GCC	frameshift_variant	HIGH	BAAT
5	22853056	.	AC	ACC	frameshift_variant&splice_region_variant	HIGH	FUT8
5	18770739	.	A	AC	frameshift_variant	HIGH	NAT10
5	16068689	.	TT	TTCCT	splice_donor_variant&intron_variant	HIGH	ENSGALG00000006873
5	36131844	.	GTTTTTT	GTTTTTTT	frameshift_variant	HIGH	SNX32
5	290065	.	C	CA	splice_acceptor_variant&splice_donor_variant&intron_variant	HIGH	CD5
5	279356	.	G	GT	frameshift_variant	HIGH	TMEM132A
5	18935926	.	T	TG	frameshift_variant&splice_region_variant	HIGH	CAT
5	18932500	.	C	CT	frameshift_variant&stop_gained&splice_region_variant	HIGH	CAT
5	19342575	.	A	AC	frameshift_variant	HIGH	ENSGALG00000007886
5	28194524	.	AAG	AAGAG	frameshift_variant&splice_region_variant	HIGH	PLEKHD1
5	32187167	.	GT	GTT	frameshift_variant	HIGH	DPH6
5	433697	.	ACCC	ACCCC	frameshift_variant	HIGH	DAGLA
5	316894	.	C	CG	splice_acceptor_variant&splice_donor_variant&intron_variant	HIGH	DDB1
6	21697727	.	CT	CTT	frameshift_variant&splice_region_variant	HIGH	KIF11
6	21667849	.	GCCCCCCCC	GCCCCCCCCC,GCCCCCCCCCC	frameshift_variant	HIGH	HHEX
6	5941581	.	CAA	CA	frameshift_variant	HIGH	UBE2D1
6	21786895	.	ATT	ATTT	splice_acceptor_variant&splice_donor_variant&intron_variant	HIGH	44260
6	24592318	.	T	TC	frameshift_variant	HIGH	CALHM2
6	16678777	.	CTGT	CT	frameshift_variant	HIGH	ZSWIM8
6	3419056	.	GAAAAAAAAAAAA	GAAAAAAAAA,GAAAAAAAAAA,GAAAAAAAA	frameshift_variant&start_lost	HIGH	SHLD2
6	34334255	.	GCTCTCT	GCTCT	frameshift_variant	HIGH	ENSGALG00000025996
6	33728731	.	G	GA	frameshift_variant	HIGH	ENSGALG00000052052
6	33728730	.	TG	TGG	frameshift_variant	HIGH	ENSGALG00000052052
6	21757895	.	A	AG	frameshift_variant&splice_region_variant	HIGH	IDE
6	20099021	.	CATA	CA	frameshift_variant&stop_lost	HIGH	FAS
6	21757894	.	GAA	GAAA	splice_donor_variant&intron_variant	HIGH	IDE
6	28608440	.	GAAAAAAA	GAAAAAAAA	frameshift_variant	HIGH	ADRB1
6	21689512	.	A	AG	frameshift_variant&splice_region_variant	HIGH	KIF11
6	20739116	.	AT	ATT	splice_acceptor_variant&splice_donor_variant&intron_variant	HIGH	TNKS2
6	21689511	.	GA	GAA	frameshift_variant&splice_region_variant	HIGH	KIF11
6	21667854	.	C	CA	frameshift_variant	HIGH	HHEX
6	17519540	.	GTTTTTTTT	GTTTTTTTTTT	splice_donor_variant&intron_variant	HIGH	TM9SF3
7	15404202	.	T	TCA	frameshift_variant&splice_region_variant	HIGH	ENSGALG00000009149
7	18062815	.	TCC	TCCC	frameshift_variant	HIGH	METTL8
7	27168614	.	ACTCTCT	ACTCT	frameshift_variant	HIGH	ENSGALG00000050781
7	17976589	.	T	TC	frameshift_variant	HIGH	DYNC1I2
7	26243511	.	GTTTTTTTTT	GTTTTTTTT	frameshift_variant	HIGH	NIFK
7	35441628	.	GGCCGCCGCCGCCGCCGCC	GGCCGCCGCCGCCGCCGCCGCC	start_lost&conservative_inframe_insertion	HIGH	FMNL2
7	15404200	.	CCT	CCTCT	frameshift_variant&splice_region_variant	HIGH	ENSGALG00000009149
7	17656907	.	AGG	AGGG	frameshift_variant&splice_region_variant	HIGH	PPP1R9B
7	17656904	.	GAAA	GAAAA	frameshift_variant&splice_region_variant	HIGH	PPP1R9B
7	16688953	.	AG	AGG	frameshift_variant&splice_region_variant	HIGH	ATF2
7	18022117	.	AGT	AGTCTCTGT	splice_acceptor_variant&intron_variant	HIGH	DCAF17
7	17970207	.	A	AG	splice_acceptor_variant&splice_donor_variant&intron_variant	HIGH	DYNC1I2
7	15058084	.	TTGT	TTGTGT	splice_acceptor_variant&intron_variant	HIGH	SESTD1
7	16688952	.	GA	GAA	frameshift_variant&splice_region_variant	HIGH	ATF2
7	17970205	.	CAAA	CAAAA	splice_acceptor_variant&splice_donor_variant&intron_variant	HIGH	DYNC1I2
7	18062817	.	C	CT	frameshift_variant	HIGH	METTL8
8	5499314	.	TG	TGG	frameshift_variant	HIGH	ENSGALG00000031430
8	5499316	.	TC	TCC	frameshift_variant	HIGH	ENSGALG00000031430
8	4389986	.	AGAGCGGAGCGGAGCGGAGCGGAGC	AGAGCGGAGCGGAGCGGAGC	frameshift_variant	HIGH	CRIP2
8	5193237	.	TA	TAA	frameshift_variant&splice_region_variant	HIGH	FMO3
8	5193238	.	AGGGG	AGGGGG	splice_acceptor_variant&splice_donor_variant&intron_variant	HIGH	FMO3
8	8332890	.	TAAAAGAAAAA	TAAAAA	frameshift_variant	HIGH	FAM129A
8	21538021	.	ATTTTTTTTT	ATTTTTTTT	frameshift_variant	HIGH	NASP
8	5451199	.	C	CT	frameshift_variant&splice_region_variant	HIGH	SCYL3
8	12083711	.	GATATA	GATA	frameshift_variant&splice_region_variant	HIGH	ENSGALG00000020884
8	5991579	.	TG	TGG	splice_acceptor_variant&splice_donor_variant&intron_variant	HIGH	RNASEL
8	17005024	.	CGTG	CGTGTG	frameshift_variant	HIGH	DNASE2B
8	22241787	.	CAG	C	frameshift_variant	HIGH	CYP4B7
8	25600858	.	GCC	GCCC	frameshift_variant	HIGH	PARS2
8	5499315	.	GT	GTT	frameshift_variant	HIGH	ENSGALG00000031430
8	25003758	.	CC	CCACCGC	frameshift_variant	HIGH	MAGOH
8	8332891	.	AAAAGAAA	AAAA	frameshift_variant	HIGH	FAM129A
8	25600938	.	TACACACACAC	TACACACACACAC	frameshift_variant	HIGH	PARS2
8	5451200	.	C	CA	splice_acceptor_variant&splice_donor_variant&intron_variant	HIGH	SCYL3
9	4911593	.	AAAAAGAAA	AAAA	frameshift_variant	HIGH	UBXN7
9	4911594	.	AAAAGAAAG	AAAAG	frameshift_variant	HIGH	UBXN7
9	801446	.	AAGAGAGA	AAGAGAGAGA	frameshift_variant	HIGH	ENSGALG00000047235
9	20107411	.	CAAAAAAAA	CAAAAAAAAA	frameshift_variant	HIGH	ENSGALG00000009409
9	4911596	.	AAGA	AA	frameshift_variant	HIGH	UBXN7
9	17689199	.	GA	GAA	splice_acceptor_variant&splice_donor_variant&intron_variant	HIGH	ZNF639
9	17689198	.	AG	AGG	splice_acceptor_variant&splice_donor_variant&intron_variant	HIGH	ZNF639
9	20107467	.	AGGGG	AGGGGG	frameshift_variant	HIGH	ENSGALG00000009409
10	10846821	.	GCTCTCTC	GCTCTC	frameshift_variant&start_lost	HIGH	ENSGALG00000048077
10	3845793	.	TGT	TGTGAGT	frameshift_variant	HIGH	TMEM266
10	11165525	.	C	CA	frameshift_variant	HIGH	ENSGALG00000033780
10	11113294	.	ATT	ATTT	frameshift_variant	HIGH	ENSGALG00000005682
10	8473117	.	GAAA	GAAAA	frameshift_variant	HIGH	RSL24D1
10	15099856	.	CGGT	C	frameshift_variant&splice_donor_variant&splice_region_variant&intron_variant	HIGH	CHD2
10	6239956	.	TTATA	TTA	frameshift_variant	HIGH	MPHOSPH10
10	19918406	.	GCTGG	GCTGGGACCTGG	frameshift_variant	HIGH	TLE3
10	10865634	.	CG	CGG	frameshift_variant	HIGH	SECISBP2L
10	8473119	.	A	AG	frameshift_variant	HIGH	RSL24D1
10	10937020	.	T	TA	frameshift_variant&splice_region_variant	HIGH	GALK2
10	18898405	.	TTCTCTCTCTCT	TTCTCTCTCTCTCT	frameshift_variant	HIGH	TIPIN
10	20090654	.	CT	C	splice_acceptor_variant&intron_variant	HIGH	MORF4L2
10	6679132	.	CTTTTTTTT	CTTTTTTTTTT,CTTTTTTTTT,CTTTTTTTTTTT	splice_acceptor_variant&intron_variant	HIGH	TARSL2
10	18165901	.	GT	GTT	splice_donor_variant&intron_variant	HIGH	SPG21
10	15117647	.	AGG	AGGG	frameshift_variant	HIGH	RGMA
10	20369353	.	ATGCCGTGCCGTGCCGTGCCG	ATGCCGTGCCGTGCCG	frameshift_variant	HIGH	CTSH
11	7850357	.	GTTTTTTTT	GTTTTTTT	frameshift_variant&stop_lost&splice_region_variant	HIGH	ENSGALG00000004428
11	17914213	.	TG	TGCG	frameshift_variant	HIGH	KLHDC4
11	17914220	.	C	CCA	frameshift_variant&splice_region_variant	HIGH	KLHDC4
11	17380481	.	AT	ATT	frameshift_variant	HIGH	MTHFSD
11	17380480	.	CA	CAA	frameshift_variant	HIGH	MTHFSD
11	17639386	.	G	GC	frameshift_variant	HIGH	GSE1
11	17639385	.	AGGG	AGGGG	frameshift_variant	HIGH	GSE1
11	620571	.	CTTT	CTTTT	frameshift_variant	HIGH	HERPUD1
11	17914217	.	G	GGC	frameshift_variant	HIGH	KLHDC4
11	11443472	.	GC	GCC	frameshift_variant	HIGH	TK2
11	17010007	.	TAA	TAAA	frameshift_variant&splice_region_variant	HIGH	HNF4beta
11	7288304	.	GCC	GCCC	frameshift_variant&splice_region_variant	HIGH	N4BP1
11	55148	.	GTT	GTTT	frameshift_variant	HIGH	ENSGALG00000051766
11	17010009	.	AG	AGG	splice_acceptor_variant&splice_donor_variant&intron_variant	HIGH	HNF4beta
12	12189315	.	TCCCCCC	TCCCCCCC	frameshift_variant	HIGH	RPP14
12	9007571	.	CCGAGGCGCGAGGCGCGAGGCGC	CCGAGGCGCGAGGCGC	frameshift_variant	HIGH	APPL1
12	1850185	.	CCTG	CCTGGCTG	frameshift_variant	HIGH	ENSGALG00000041338
12	8304282	.	GCCTACCT	GCCT	frameshift_variant	HIGH	WNT5A
12	17694557	.	CAATAAATAA	CAATAA	frameshift_variant	HIGH	CHL1
12	3536235	.	GCACTACTCAC	GCACTACTCACTACTCAC	frameshift_variant&stop_gained&splice_region_variant	HIGH	ENSGALG00000042984
12	20327805	.	CGGGGGG	CGGGGGGG	frameshift_variant	HIGH	ENSGALG00000054017
12	1852760	.	GCTCTCTCCC	GC	frameshift_variant	HIGH	RASSF1
12	1852634	.	AGGCTCGGCTCGGCTCGGCTC	AGGCTCGGCTCGGCTCGGCTCGGCTC	frameshift_variant	HIGH	RASSF1
12	15729754	.	T	TC	frameshift_variant&splice_region_variant	HIGH	ARL6IP5
13	628561	.	CGGGGGGGGGG	CGGGGGGGGG	frameshift_variant	HIGH	PORCN
13	12765227	.	GATATATATATATATA	GATATATATATATATATA	frameshift_variant	HIGH	LARP1
13	16620762	.	TAAAAAA	TAAAAAAAA	splice_acceptor_variant&intron_variant	HIGH	TCF7
13	17597132	.	CGAGATGAGATGAGATGAGACGAGATGAGATGA	CGAGATGAGATGAGACGAGATGAGATGA	frameshift_variant	HIGH	IRF1
13	10782373	.	ACCC	ACCCC	splice_acceptor_variant&splice_donor_variant&intron_variant	HIGH	KIF20A
13	16414535	.	C	CA	splice_acceptor_variant&splice_donor_variant&intron_variant	HIGH	CAMLG
13	9313497	.	CAA	CAAA	splice_acceptor_variant&intron_variant	HIGH	ENSGALG00000051897
13	10808209	.	TGGGG	TGGGGG	frameshift_variant	HIGH	NHP2
13	2690314	.	CTCCAGTTC	CTC	frameshift_variant&stop_lost&splice_region_variant	HIGH	ARAP3
13	10852756	.	AGG	AGGG	frameshift_variant&splice_region_variant	HIGH	GRK6
13	17181164	.	CTTT	CTTTT	frameshift_variant	HIGH	ENSGALG00000029896
13	10852797	.	CG	CGG	splice_acceptor_variant&intron_variant	HIGH	GRK6
13	10892776	.	CTTT	CTTTT	splice_donor_variant&intron_variant	HIGH	DOK3
13	10861101	.	CC	CCAC	frameshift_variant	HIGH	PRR7
13	17597055	.	CCTGTGCTGTGCTGTGCTGTGCTGTG	CCTGTGCTGTGCTGTGCTGTG	frameshift_variant	HIGH	IRF1
13	10955279	.	C	CG	splice_donor_variant&intron_variant	HIGH	ENSGALG00000002971
13	10779339	.	AG	AGG	splice_acceptor_variant&splice_donor_variant&intron_variant	HIGH	KIF20A
13	13768315	.	TCCCC	TCCCCCC	frameshift_variant	HIGH	SMIM3
13	9520041	.	T	TG	frameshift_variant	HIGH	UBTD2
13	9084601	.	TGAGA	TGA	frameshift_variant	HIGH	ENSGALG00000001206
13	9237114	.	CG	CGG	frameshift_variant	HIGH	GRPEL2
13	17181163	.	TC	TCC	frameshift_variant	HIGH	ENSGALG00000029896
13	10808212	.	G	GT	frameshift_variant	HIGH	NHP2
13	14213030	.	CAG	C	frameshift_variant&stop_lost&splice_region_variant	HIGH	ENSGALG00000021275
13	9149998	.	GC	GCC	frameshift_variant	HIGH	ENSGALG00000039652
14	8080473	.	C	CT	frameshift_variant&splice_region_variant	HIGH	ABCC1
14	8080472	.	ACC	ACCC	splice_acceptor_variant&splice_donor_variant&intron_variant	HIGH	ABCC1
14	13217450	.	C	CT	splice_acceptor_variant&splice_donor_variant&intron_variant	HIGH	CLUAP1
14	12346256	.	A	AG	frameshift_variant	HIGH	GTF3C1
14	13236583	.	C	CT	frameshift_variant	HIGH	ANKS3
14	15201733	.	GAAAAAAA	GAAAAAAAA	frameshift_variant	HIGH	ENSGALG00000053304
14	12322393	.	CA	CAA	frameshift_variant&splice_region_variant	HIGH	KIAA0556
14	3643373	.	AAAACCAAA	AAAA	splice_acceptor_variant&splice_region_variant&intron_variant	HIGH	ENSGALG00000047636
14	7982775	.	T	TC	splice_acceptor_variant&splice_donor_variant&intron_variant	HIGH	MYH11
14	12356587	.	GAAA	GAAAA	frameshift_variant	HIGH	GTF3C1
14	13608731	.	GCCCC	GCCCCC	frameshift_variant	HIGH	NUBP2
14	7821672	.	CAATAAAT	CAAT	frameshift_variant	HIGH	TSR3
14	13236584	.	CG	CGG	frameshift_variant	HIGH	ANKS3
14	13155067	.	AC	ACC	frameshift_variant	HIGH	NLRC3
14	3643371	.	ACAAAACCAAAA	ACAAAA	splice_acceptor_variant&splice_region_variant&intron_variant	HIGH	ENSGALG00000047636
14	7982773	.	GTT	GTTT	splice_acceptor_variant&splice_donor_variant&intron_variant	HIGH	MYH11
14	3626509	.	CGAGGAGGAGGAGGA	CGAGGAGGAGGAGGAGGA	start_lost&disruptive_inframe_insertion	HIGH	LFNG
14	13217449	.	AC	ACC	splice_acceptor_variant&splice_donor_variant&intron_variant	HIGH	CLUAP1
14	13090636	.	GCCCCCCCC	GCCCCCCCCC	frameshift_variant	HIGH	ENSGALG00000034737
14	12322394	.	A	AT	frameshift_variant&splice_region_variant	HIGH	KIAA0556
14	13090937	.	GCCCCCCCC	GCCCCCCCCC	frameshift_variant	HIGH	ENSGALG00000034737
15	5743410	.	CGGG	CGGGGGGG	frameshift_variant	HIGH	ENSGALG00000040131
15	6811435	.	ATTT	ATTTT	frameshift_variant	HIGH	SART3
15	9566006	.	CGG	CGGG	frameshift_variant	HIGH	ENSGALG00000046877
15	91204	.	CGGGGGGG	CGGGGGGGG	frameshift_variant	HIGH	MBLAC1
15	6950063	.	TA	T	frameshift_variant&stop_lost	HIGH	UNG
15	6688580	.	CA	C	frameshift_variant&splice_region_variant	HIGH	PTPN11
15	11463707	.	TTCCATCCATCCATCCATCCA	TTCCATCCATCCATCCA	frameshift_variant	HIGH	ENSGALG00000052820
15	1409328	.	ATGT	AT	frameshift_variant	HIGH	ARVCF
15	6945544	.	GC	GCC	frameshift_variant&splice_region_variant	HIGH	ALKBH2
15	105045	.	TCCC	TCCCC	frameshift_variant	HIGH	TAF6
15	6945543	.	AG	AGG	frameshift_variant&splice_region_variant	HIGH	ALKBH2
15	6966267	.	TC	TCC	frameshift_variant	HIGH	ENSGALG00000005043
15	5212808	.	CAAAAAA	CAAAAAAA	frameshift_variant	HIGH	ATP6V0A2
15	5743407	.	TGGCGGGC	TGGCGGGCGGGC	frameshift_variant	HIGH	ENSGALG00000040131
15	5372944	.	TTTGTTGTTGTTGTTGT	TTTGTTGTTGTTGTTGTTGT	splice_acceptor_variant&intron_variant	HIGH	ENSGALG00000003419
15	7221400	.	AA	AACA	frameshift_variant	HIGH	SGSM1
15	11100968	.	GT	G	frameshift_variant	HIGH	RNF215
15	6946352	.	G	GC	splice_acceptor_variant&splice_donor_variant&intron_variant	HIGH	ALKBH2
16	2454754	.	ACCCCCC	ACCCCCCC	frameshift_variant	HIGH	ENSGALG00000049229
16	1730606	.	GC	G	frameshift_variant	HIGH	ENSGALG00000032405
16	2440007	.	AGGG	AGG	splice_donor_variant&splice_region_variant&intron_variant	HIGH	KIFC1
16	2727803	.	CGG	CGGG	frameshift_variant	HIGH	FLOT1
16	2565451	.	CGGGGGGGG	CGGGGGGGGG	frameshift_variant	HIGH	BLB1
16	2448128	.	CGGG	CGG	frameshift_variant&splice_region_variant	HIGH	ZNF692
16	2727818	.	GCCCC	GCCCCC	frameshift_variant	HIGH	FLOT1
16	2359804	.	AG	AGG	frameshift_variant	HIGH	ENSGALG00000055025
16	2442393	.	TGG	TG	splice_acceptor_variant&splice_region_variant&intron_variant	HIGH	KIFC1
16	1873823	.	CTTTT	CTTTTT	frameshift_variant	HIGH	ENSGALG00000044472
17	5046324	.	TGCG	TG	frameshift_variant	HIGH	ENSGALG00000006958
17	7192347	.	AC	ACC	splice_acceptor_variant&intron_variant	HIGH	ENSGALG00000049884
17	6800521	.	CT	CTT	frameshift_variant	HIGH	SETX
17	6245968	.	GA	G	frameshift_variant	HIGH	FUBP3
17	9085064	.	TAAAA	TAA	frameshift_variant	HIGH	RC3H2
17	3588135	.	AAAAAAGAA	AAA	splice_acceptor_variant&splice_region_variant&intron_variant	HIGH	ENSGALG00000051635
17	3588134	.	AAAAAAAGAA	AAA	splice_acceptor_variant&splice_region_variant&intron_variant	HIGH	ENSGALG00000051635
17	8441106	.	A	ATATCCCCG	frameshift_variant	HIGH	ENSGALG00000054657
17	8609238	.	AC	A	frameshift_variant	HIGH	C5
17	6419283	.	C	CA	frameshift_variant	HIGH	NUP214
17	6419282	.	GC	GCC	frameshift_variant	HIGH	NUP214
17	1313400	.	ATCGTCCCTTCGTCCCT	ATCGTCCCTTCGTCCCTTCGTCCCT	frameshift_variant	HIGH	NDOR1
17	4897239	.	CA	CAA	frameshift_variant	HIGH	ENSGALG00000048936
17	7212405	.	TC	TCC	frameshift_variant	HIGH	ENSGALG00000033597
17	6447816	.	T	TG	frameshift_variant	HIGH	PLPP7
18	9836302	.	G	GA	frameshift_variant	HIGH	PGS1
18	10442854	.	GT	G	frameshift_variant	HIGH	SLC9A3R1
18	9777063	.	GCCCCCC	GCCCCC	frameshift_variant	HIGH	CYTH1
18	9897342	.	TCCCCCCCC	TCCCCCCC	frameshift_variant	HIGH	SLC25A10
18	9942763	.	G	GT	frameshift_variant	HIGH	ENSGALG00000049911
18	4470805	.	TCCCCCCCCC	TCCCCCCCCCCCC,TCCCCCCCCCC,TCCCCCCCCCCCCC	frameshift_variant&splice_region_variant	HIGH	UBALD2
18	9489686	.	TCC	TCCC	frameshift_variant	HIGH	ENSGALG00000050206
18	9489621	.	CAAAAAA	CAAAAA	frameshift_variant	HIGH	ENSGALG00000050206
19	9404743	.	ACGCGCGCGCGC	ACGCGCGC	frameshift_variant	HIGH	NLK
19	6333332	.	AT	ATT	frameshift_variant&stop_gained	HIGH	EFCAB5
19	9618329	.	ACT	ACTCT	splice_donor_variant&intron_variant	HIGH	CLUH
19	845659	.	CA	C	frameshift_variant	HIGH	ENSGALG00000001049
20	12531991	.	GCC	GCCC	frameshift_variant	HIGH	ENSGALG00000040546
20	10086030	.	AGGGG	AGGG	frameshift_variant	HIGH	TTLL9
20	5203484	.	GTTTTTT	GTTTTTTT	frameshift_variant	HIGH	STK4
20	5227576	.	ATTCTTCT	ATTCTTCTTCT	splice_acceptor_variant&intron_variant	HIGH	ENSGALG00000004110
20	9793577	.	ACCGCTCCGC	ACCGCTCCGCTCCGC	frameshift_variant	HIGH	ENSGALG00000006152
21	1459711	.	CTTTTTTT	CTTTTTTTT	frameshift_variant	HIGH	KBP
21	4924485	.	AG	AGG	splice_acceptor_variant&splice_donor_variant&intron_variant	HIGH	DNAJC16
21	4924484	.	CA	CAA	frameshift_variant&splice_region_variant	HIGH	DNAJC16
21	3268607	.	GAAA	GAA	frameshift_variant	HIGH	GPR157
21	1910263	.	TCCCCCCC	TCCCCCCCC	frameshift_variant	HIGH	ENSGALG00000001304
21	4842065	.	G	GA	frameshift_variant	HIGH	PLA2G2E
21	4671465	.	A	AG	frameshift_variant&splice_region_variant	HIGH	EMC1
21	4671466	.	CT	CTT	frameshift_variant&splice_region_variant	HIGH	EMC1
21	1910388	.	CTTTTTT	CTTTTTTT	frameshift_variant	HIGH	ENSGALG00000001304
21	1910212	.	CGCGGGGCGGGGCGGGGCGG	CGCGGGGCGGGGCGG	frameshift_variant	HIGH	ENSGALG00000001304
21	4414191	.	TCCCCCCCCCC	TCCCCCCCCC	frameshift_variant	HIGH	ENSGALG00000035362
22	3665587	.	TGC	T	frameshift_variant	HIGH	CIAO1
22	5140499	.	ACGGCCCGGCCCGGCCCGGC	ACGGCCCGGCCCGGC	frameshift_variant	HIGH	ENSGALG00000038783
22	5164248	.	TTTTG	TTTTGGTTTG	frameshift_variant	HIGH	NT5DC4
22	2585456	.	A	AG	frameshift_variant	HIGH	BAG4
22	4028983	.	TATCGCATCGCATCGCATCGC	TATCGCATCGCATCGC	frameshift_variant	HIGH	ENSGALG00000046830
22	3665323	.	AGGGGG	AGGG	frameshift_variant	HIGH	CIAO1
22	7633	.	AG	AGTG	frameshift_variant	HIGH	ENSGALG00000052951
22	3740080	.	GCCCCCCC	GCCCCCCCC	frameshift_variant	HIGH	CNNM4
22	1643480	.	CGTGGGGCTGTGGGGCTGTGGGGCTGTGGGGCTGTGGGG	CGTGGGGCTGTGGGGCTGTGGGGCTGTGGGG	frameshift_variant	HIGH	ENSGALG00000040807
22	3665588	.	GCT	G	frameshift_variant	HIGH	CIAO1
22	3665590	.	TGGGGG	TGGGGGG	frameshift_variant	HIGH	CIAO1
22	4028978	.	CATCGTATCG	CATCG	frameshift_variant	HIGH	ENSGALG00000046830
22	4050191	.	CGGGGGGGGG	CGGGGGGGG	frameshift_variant	HIGH	HK2
22	4010516	.	AGG	AGGG	frameshift_variant	HIGH	ENSGALG00000052712
23	5350591	.	GC	G	frameshift_variant	HIGH	RP1-27O5.3
23	6127702	.	GCCCC	GCCCCC	frameshift_variant	HIGH	ENSGALG00000048754
23	2329751	.	AGGGGGGGG	AGGGGGGG	frameshift_variant	HIGH	TCEA3
23	2539324	.	G	GCC	frameshift_variant	HIGH	RHCE
23	2030853	.	GGA	GGAGA	frameshift_variant	HIGH	TMEM222
23	2538328	.	T	TG	frameshift_variant&splice_region_variant	HIGH	RHCE
23	5122656	.	CAA	CA	frameshift_variant	HIGH	ENSGALG00000026836
23	2544261	.	TCACA	TCA	splice_acceptor_variant&splice_region_variant&intron_variant	HIGH	RHCE
23	4542464	.	CAAAAAA	CAAAAAAA	frameshift_variant	HIGH	SFPQ
23	2162759	.	AG	AGG	frameshift_variant	HIGH	AHDC1
23	2164495	.	GC	G	frameshift_variant	HIGH	AHDC1
23	2539323	.	T	TAC	frameshift_variant	HIGH	RHCE
24	446185	.	TTATA	TTA	splice_donor_variant&splice_region_variant&intron_variant	HIGH	FAM118B
24	4225012	.	AGGGGGGG	AGGGGGGGG	frameshift_variant	HIGH	C1QTNF5
24	5609683	.	TAGA	TA	frameshift_variant	HIGH	BCL9L
24	6234618	.	CA	C	frameshift_variant	HIGH	C11orf52
25	2076707	.	CGGAC	CGGACGGAAGGAC	frameshift_variant	HIGH	ENSGALG00000049774
25	3878783	.	GGGGGGGCCGGGGGG	GGGGGGG	frameshift_variant	HIGH	IGSF9
25	1829673	.	CGGGGGG	CGGGGGGG	frameshift_variant	HIGH	OTUD7B
25	2925907	.	TGGGGGGGGGGGGG	TGGGGGGGGGGG,TGGGGGGGGGGGG	frameshift_variant	HIGH	ATP8B2
25	3705819	.	T	TC	frameshift_variant	HIGH	ENSGALG00000043416
25	3334192	.	CGGGGGG	CGGGGGGGG	frameshift_variant	HIGH	ENSGALG00000042129
25	3705818	.	AT	ATT	frameshift_variant	HIGH	ENSGALG00000043416
25	677803	.	CGGG	CGG	frameshift_variant&splice_region_variant	HIGH	LMNA
25	2101844	.	AGG	AGGG	frameshift_variant&splice_region_variant	HIGH	ENSGALG00000040685
25	3878791	.	CGGGGGG	CGGGGGGG	frameshift_variant	HIGH	IGSF9
25	3394722	.	CGTGTGTGTGTG	CGTGTGTGTG	frameshift_variant	HIGH	INTS3
25	3444616	.	CGGGGG	CGGGGGG	frameshift_variant	HIGH	ENSGALG00000049516
25	3334191	.	C	CTG	frameshift_variant	HIGH	ENSGALG00000042129
26	2264176	.	TC	T	frameshift_variant	HIGH	NUCKS1
26	5517018	.	CGGGGGGGG	CGGGGGGGGG	frameshift_variant	HIGH	ENSGALG00000052652
26	1326748	.	GCCCCCCCCC	GCCCCCCCC	frameshift_variant	HIGH	STRIP1
26	3562922	.	TCACA	TCA	frameshift_variant	HIGH	PPM1J
26	2390911	.	AATGTTA	AA	frameshift_variant	HIGH	ENSGALG00000000816
26	5516983	.	CGGGGGG	CGGGGGGG	frameshift_variant	HIGH	ENSGALG00000052652
26	4971377	.	ATGTGT	ATGT	frameshift_variant	HIGH	ENSGALG00000028262
26	2264173	.	TTCTCT	TTCT	frameshift_variant	HIGH	NUCKS1
26	2264177	.	CTTTTTTTTTTTTT	CTTTTTTTTTTTTTTT,CTTTTTTTTTTTTTT,CTTTTTTTTTTT	frameshift_variant	HIGH	NUCKS1
27	7509642	.	CCGTG	CCGTGGCGTG	frameshift_variant	HIGH	NT5C3B
27	6528969	.	TGGAGGAGGAGGAGGAGG	TGGAGGAGGAGGAGGAGGAGG	splice_donor_variant&intron_variant	HIGH	MRPL10
27	5609563	.	ACCCCC	ACCCCCC	frameshift_variant	HIGH	ITGA3
27	5991163	.	ATTT	ATTTT	frameshift_variant&splice_region_variant	HIGH	PHB
27	7509910	.	CGCGCTGCGCTGCGCT	CGCGCTGCGCTGCGCTGCGCT	frameshift_variant	HIGH	NT5C3B
27	6538226	.	CGGGGGGGGG	CGGGGGGGGGG,CGGGGGGGGGGG	frameshift_variant	HIGH	TBX21
27	7509615	.	CGCCGTGCCGTGCCGTGCCGTGCCGTGCCGTGCCG	CGCCGTGCCGTGCCGTGCCGTGCCGTGCCGTGCCGTGCCG	frameshift_variant	HIGH	NT5C3B
28	3273692	.	GGA	G	frameshift_variant	HIGH	ENSGALG00000040182
28	985859	.	TCGCCCCGCCCCGC	TCGCCCCGCCCCGCCCCGC	splice_acceptor_variant&intron_variant	HIGH	CD320
28	2756021	.	CTTTTTTTTTTTTT	CTTTTTTTTTTTTTTT,CTTTTTTTTTTTTTT,CTTTTTTTTTTTTTTTT	splice_acceptor_variant&intron_variant	HIGH	ENSGALG00000001317
28	3257535	.	CTGTG	CTGTGTG	frameshift_variant	HIGH	ENSGALG00000015203
28	3273693	.	GAAAAAAAAAAAAAAAA	GAAAAAAAAAAAAAA,GAAAAAAAAAAAAAAA,GAAAAAAAAAAAAA	frameshift_variant	HIGH	ENSGALG00000040182
28	1371091	.	C	CAA	frameshift_variant	HIGH	ENSGALG00000054174
28	1841694	.	ACTC	AC	frameshift_variant	HIGH	ZNF414
28	3360488	.	CA	CAA	frameshift_variant	HIGH	SLC39A3
28	3149559	.	CGGG	CGGGG	frameshift_variant	HIGH	MIDN
28	1007775	.	CA	C	frameshift_variant	HIGH	ENSGALG00000039708
28	1199332	.	TGGGG	TGGG	frameshift_variant	HIGH	ENSGALG00000054634
30	524726	.	ACAGCAGCAGCAGCAGCAGCAG	ACAGCAGCAGCAGCAGCAGCAGCAG	splice_donor_variant&intron_variant	HIGH	ENSGALG00000034725
30	73055	.	GCCCCC	GCCCCCC	frameshift_variant	HIGH	ILF3
30	246351	.	CG	CGG	splice_acceptor_variant&splice_donor_variant&intron_variant	HIGH	TRAPPC5
30	278690	.	CG	CGG	frameshift_variant	HIGH	SUV39H1
30	873446	.	AA	AACGAGA	frameshift_variant	HIGH	GIPC1
30	1374517	.	G	GGT	frameshift_variant	HIGH	ENSGALG00000041008
30	1477863	.	CGG	CGGG	frameshift_variant	HIGH	ENSGALG00000047412
30	1209357	.	TGGGGGGGGGG	TGGGGGGGGGGG	frameshift_variant	HIGH	ENSGALG00000051159
30	286266	.	TGGG	TGGGG	frameshift_variant	HIGH	TBC1D25
30	397114	.	TGGGGG	TGGGGGG,TGGGGGGG	frameshift_variant&splice_region_variant	HIGH	ACP5
30	302158	.	TCCC	TCCCC	frameshift_variant	HIGH	ENSGALG00000047515
30	46590	.	CGGG	CGG	frameshift_variant	HIGH	ILF3
30	646293	.	TGGG	TGGGG	frameshift_variant	HIGH	C3
31	3028012	.	GCC	GCCC	frameshift_variant	HIGH	ENSGALG00000049114
31	2219705	.	GCCCC	GCCCCC	frameshift_variant	HIGH	ENSGALG00000050005
31	2259480	.	C	CA	frameshift_variant	HIGH	ENSGALG00000054251
31	2265424	.	GGC	G	splice_donor_variant&intron_variant	HIGH	ENSGALG00000054294
31	2265375	.	TGGG	TGG	frameshift_variant	HIGH	ENSGALG00000054294
31	935497	.	CT	CTT	frameshift_variant	HIGH	ENSGALG00000044521
31	2559726	.	GCCC	GCCCC	frameshift_variant	HIGH	ENSGALG00000054496
32	577120	.	GAAA	GAAAA	splice_acceptor_variant&intron_variant	HIGH	ENSGALG00000049935
32	513214	.	AGGGGGGGGG	AGGGGGGGGGG,AGGGGGGGGGGG	frameshift_variant	HIGH	FBXO46
32	415832	.	GT	G	frameshift_variant	HIGH	ENSGALG00000050819
32	533331	.	TGGGGG	TGGGGGG	frameshift_variant	HIGH	ENSGALG00000048592
32	305441	.	CGGGGGG	CGGGGGGGG	frameshift_variant	HIGH	ENSGALG00000052101
32	87553	.	GCCCCC	GCCCCCC	frameshift_variant	HIGH	ACTN4
32	87733	.	TCCCCCCC	TCCCCCCCC	frameshift_variant	HIGH	ACTN4
33	4880516	.	GGCGTTG	GG	frameshift_variant	HIGH	ENSGALG00000049557
33	6304328	.	ACCCC	ACCCCC	frameshift_variant	HIGH	NAA40
33	6690151	.	AGGGGGGG	AGGGGGGGGG	frameshift_variant	HIGH	KCNC3
33	4880509	.	CCGGCGCGGCG	CCGGCG	frameshift_variant	HIGH	ENSGALG00000049557
33	6912364	.	ACCCCCC	ACCCCCCC	frameshift_variant	HIGH	ENSGALG00000052945
33	5040822	.	TATGGGATGGGA	TATGGGATGGGATGGGA	frameshift_variant	HIGH	BIN2
33	6271854	.	GCCCCCCCC	GCCCCCCCCC,GCCCCCCCCCC	frameshift_variant	HIGH	ENSGALG00000048236
33	7205794	.	TCCCC	TCCC	frameshift_variant	HIGH	RARG
33	4664118	.	A	AGC	frameshift_variant	HIGH	ENSGALG00000052983
33	5509329	.	TC	TCC	frameshift_variant	HIGH	ENSGALG00000047567
33	5483362	.	CCCGCACCGCACCGCACCGCACCGC	CCCGCACCGCACCGCACCGCACCGCACCGC	frameshift_variant	HIGH	ITGA7
33	6276171	.	CGGGGGGGGG	CGGGGGGGG	frameshift_variant	HIGH	ENSGALG00000048236
33	6406631	.	CGGGGGGGG	CGGGGGGGGG,CGGGGGGGGGG	frameshift_variant	HIGH	ENSGALG00000047632
33	6659168	.	AC	ACC	frameshift_variant	HIGH	ENSGALG00000049136
33	6277149	.	AGGG	AGGGG	frameshift_variant	HIGH	ENSGALG00000048236
33	6997688	.	CGGGGGG	CGGGGGGGG	frameshift_variant	HIGH	NABP2
33	7014289	.	GCCCCC	GCCCCCC	frameshift_variant	HIGH	SMARCC2
33	6059704	.	TCCC	TCCCC	frameshift_variant	HIGH	ENSGALG00000049272
33	5406596	.	C	CA	frameshift_variant	HIGH	KRT18
33	6907293	.	ACCCCCCC	ACCCCCCCC	frameshift_variant	HIGH	ENSGALG00000029588
33	6408091	.	A	AGC	frameshift_variant	HIGH	ENSGALG00000047632
33	3693079	.	ACCCCCCC	ACCCCCCCC	frameshift_variant	HIGH	ENSGALG00000047859
33	5509330	.	CGGGG	CGGGGG	frameshift_variant	HIGH	ENSGALG00000047567
33	6690158	.	G	GGT	frameshift_variant	HIGH	KCNC3
33	6994143	.	TGGGGGG	TGGGGGGG	frameshift_variant	HIGH	NABP2

## Sheet: Functional_enrichment Favrolla
#Term	Database	ID	Input number	Background number	P-Value	Corrected P-Value	Input	Hyperlink
Ribosome	KEGG PATHWAY	gga03010	15	120	2.74049e-05	0.00477151	MRPL10	RPLP0	RPS16	RPS15	RPS14	MRPL18	MRPS5	RSL24D1	RPL3	RPS15A	FAU	RPL11	RPL12	MRPL1	RPS2	http://www.genome.jp/kegg-bin/show_pathway?gga03010/gga:417871%09red/gga:419682%09red/gga:416275%09red/gga:101749142%09red/gga:416544%09red/gga:417264%09red/gga:395835%09red/gga:416706%09red/gga:396448%09red/gga:422507%09red/gga:421585%09red/gga:768911%09red/gga:426521%09red/gga:418016%09red/gga:427675%09red
Metabolic pathways	KEGG PATHWAY	gga01100	70	1290	5.41256e-05	0.00712023	NADK	ACP5	PDXK	ACSBG2	CKB	GNPDA2	BAAT	MCCC2L	CAT	GART	PIP5K1C	SMPD1	MDH2	HTD2	PGS1	FH	NT5DC4	CYP2U1	EXT2	QRSL1	QPRT	IDH3B	LPIN1	AASS	AKR1E2	OXSM	PLA2G2E	NT5C3B	NDUFB7	RPIA	DGKE	HMGCS2	PGLS	MTMR4	FDFT1	ENPP4	GUSB	PHYKPL	TDO2	LIAS	ST3GAL5	HK2	ACSS3
Protein export	KEGG PATHWAY	gga03060	6	23	0.000260044	0.0177418	SRP54	SPCS2	SRPRA	SRP72	SEC61B	SEC61A2	http://www.genome.jp/kegg-bin/show_pathway?gga03060/gga:423322%09red/gga:422626%09red/gga:426369%09red/gga:420997%09red/gga:419056%09red/gga:419713%09red
Influenza A	KEGG PATHWAY	gga05164	13	135	0.00092937	0.0436638	IL18	BLB1	IFIH1	NUP98	FAS	BID	SLC25A5	IFNAR2	TNFRSF10B	RAB11B	CREBBP	RNASEL	HNRNPUL1	http://www.genome.jp/kegg-bin/show_pathway?gga05164/gga:395274%09red/gga:395312%09red/gga:693256%09red/gga:416667%09red/gga:430616%09red/gga:395236%09red/gga:776596%09red/gga:373904%09red/gga:424410%09red/gga:420063%09red/gga:772225%09red/gga:424185%09red/gga:395664%09red
Cell cycle	KEGG PATHWAY	gga04110	11	114	0.00220626	0.0676482	TGFB1	ZBTB17	RBL1	PLK1	RB1	PRKDC	DBF4	MCM2	CDC45	CUL1	CREBBP	http://www.genome.jp/kegg-bin/show_pathway?gga04110/gga:100873157%09red/gga:416027%09red/gga:419126%09red/gga:416667%09red/gga:395376%09red/gga:386582%09red/gga:416575%09red/gga:420536%09red/gga:416776%09red/gga:420783%09red/gga:396541%09red
Phagosome	KEGG PATHWAY	gga04145	12	132	0.00225114	0.0676482	BLB1	ITGB2	DYNC1LI2	DYNC1I2	ATP6V1E1	BF2	CYBA	ATP6V0A2	C3	CTSS	SEC61B	SEC61A2	http://www.genome.jp/kegg-bin/show_pathway?gga04145/gga:418162%09red/gga:693256%09red/gga:425389%09red/gga:395473%09red/gga:426369%09red/gga:420997%09red/gga:415793%09red/gga:424151%09red/gga:396181%09red/gga:396370%09red/gga:425657%09red/gga:100859840%09red
Endocytosis	KEGG PATHWAY	gga04144	17	228	0.00232682	0.0676482	RAB11FIP3	CAPZA2	ARAP3	SPG21	VPS36	GRK6	ARPC2	STAMBP	VPS37C	VPS37A	BF2	PIP5K1C	RAB11B	VPS4B	CYTH1	CLTCL1	SH3KBP1	http://www.genome.jp/kegg-bin/show_pathway?gga04144/gga:100857269%09red/gga:417771%09red/gga:771090%09red/gga:415526%09red/gga:418608%09red/gga:423023%09red/gga:425389%09red/gga:418883%09red/gga:416765%09red/gga:420901%09red/gga:422085%09red/gga:420063%09red/gga:420072%09red/gga:429041%09red/gga:416196%09red/gga:422732%09red/gga:416361%09red
Tryptophan metabolism	KEGG PATHWAY	gga00380	6	39	0.00289607	0.0733478	TDO2	CAT	ECHS1	DDC	KYAT3	ACMSD	http://www.genome.jp/kegg-bin/show_pathway?gga00380/gga:422409%09red/gga:420947%09red/gga:423600%09red/gga:424517%09red/gga:770828%09red/gga:424288%09red
Lysine degradation	KEGG PATHWAY	gga00310	7	54	0.00317454	0.0767082	PHYKPL	AASS	KMT2E	SUV39H1	ECHS1	EZH2	SETD2	http://www.genome.jp/kegg-bin/show_pathway?gga00310/gga:100857640%09red/gga:417712%09red/gga:417757%09red/gga:420784%09red/gga:420404%09red/gga:770828%09red/gga:416374%09red
Apoptosis	KEGG PATHWAY	gga04210	11	127	0.00473114	0.097247	CTSH	ITPR1	PTPN13	SPTAN1	BID	DAB2IP	PARP1	TNFRSF10B	FAS	ITPR2	CTSS	http://www.genome.jp/kegg-bin/show_pathway?gga04210/gga:395274%09red/gga:422591%09red/gga:418212%09red/gga:395236%09red/gga:417117%09red/gga:373904%09red/gga:396199%09red/gga:374234%09red/gga:395412%09red/gga:770109%09red/gga:425657%09red
Notch signaling pathway	KEGG PATHWAY	gga04330	6	44	0.00494205	0.10002	KAT2B	DLL1	DLL4	HES1	LFNG	CREBBP	http://www.genome.jp/kegg-bin/show_pathway?gga04330/gga:395820%09red/gga:416667%09red/gga:769039%09red/gga:428441%09red/gga:423208%09red/gga:395790%09red
Herpes simplex virus 1 infection	KEGG PATHWAY	gga05168	12	150	0.00583802	0.109713	BLB1	IFIH1	FAS	PTPN11	EIF2B2	BID	IFNAR2	BF2	PDIA3	C3	RNASEL	C5	http://www.genome.jp/kegg-bin/show_pathway?gga05168/gga:395274%09red/gga:395236%09red/gga:693256%09red/gga:373899%09red/gga:425389%09red/gga:423359%09red/gga:395815%09red/gga:424410%09red/gga:424185%09red/gga:417122%09red/gga:396370%09red/gga:395664%09red
Protein processing in endoplasmic reticulum	KEGG PATHWAY	gga04141	12	153	0.00673244	0.123499	HERPUD1	SEC23A	PDIA3	HSPA4L	SEL1L	HSP90B1	SEC61B	SSR2	UBE2D1	NGLY1	CUL1	SEC61A2	http://www.genome.jp/kegg-bin/show_pathway?gga04141/gga:422496%09red/gga:423641%09red/gga:374163%09red/gga:423335%09red/gga:415644%09red/gga:420997%09red/gga:420655%09red/gga:423391%09red/gga:420783%09red/gga:426369%09red/gga:373899%09red/gga:425656%09red
MAPK signaling pathway	KEGG PATHWAY	gga04010	17	261	0.00817114	0.135209	TGFB1	MAP4K3	RPS6KA5	STMN1	MAP4K4	SOS1	FAS	CACNB1	MRAS	STK4	MAPK11	ANGPT2	VEGFA	NLK	ATF2	IL1R1	PPM1B	http://www.genome.jp/kegg-bin/show_pathway?gga04010/gga:417669%09red/gga:419187%09red/gga:100873157%09red/gga:418714%09red/gga:777366%09red/gga:395909%09red/gga:395274%09red/gga:396481%09red/gga:425965%09red/gga:423408%09red/gga:395610%09red/gga:395149%09red/gga:421404%09red/gga:417739%09red/gga:396057%09red/gga:395727%09red/gga:431192%09red
ECM-receptor interaction	KEGG PATHWAY	gga04512	8	83	0.00852594	0.139328	HMMR	LAMA1	HSPG2	ITGA3	GP1BB	COL4A1	VWF	ITGA7	http://www.genome.jp/kegg-bin/show_pathway?gga04512/gga:429806%09red/gga:101749098%09red/gga:374016%09red/gga:419031%09red/gga:107051576%09red/gga:395530%09red/gga:373946%09red/gga:416163%09red
Carbon metabolism	KEGG PATHWAY	gga01200	9	102	0.00909734	0.140651	IDH3B	ENO1	HK2	PGLS	CAT	ECHS1	RPIA	MDH2	FH	http://www.genome.jp/kegg-bin/show_pathway?gga01200/gga:374044%09red/gga:422931%09red/gga:430442%09red/gga:420969%09red/gga:417517%09red/gga:396017%09red/gga:423600%09red/gga:770828%09red/gga:426573%09red
Wnt signaling pathway	KEGG PATHWAY	gga04310	11	141	0.00958052	0.145701	PORCN	TCF7	LRP5	CAMK2D	WNT5A	CTNNB1	PPARD	NLK	VANGL2	CUL1	CREBBP	http://www.genome.jp/kegg-bin/show_pathway?gga04310/gga:423114%09red/gga:107050792%09red/gga:395703%09red/gga:395229%09red/gga:417669%09red/gga:395479%09red/gga:426903%09red/gga:416667%09red/gga:422688%09red/gga:420783%09red/gga:395964%09red
FoxO signaling pathway	KEGG PATHWAY	gga04068	10	123	0.0102417	0.150535	TGFB1	SIRT1	SOS1	PLK1	PRKAG2	CAT	STK4	MAPK11	NLK	CREBBP	http://www.genome.jp/kegg-bin/show_pathway?gga04068/gga:417669%09red/gga:419187%09red/gga:100873157%09red/gga:423646%09red/gga:416667%09red/gga:431192%09red/gga:416575%09red/gga:423600%09red/gga:417739%09red/gga:420435%09red
Cellular senescence	KEGG PATHWAY	gga04218	11	143	0.0105071	0.153578	TGFB1	SIRT1	RBL1	RB1	ITPR2	MRAS	SLC25A5	BF2	MAPK11	VDAC3	ITPR1	http://www.genome.jp/kegg-bin/show_pathway?gga04218/gga:426793%09red/gga:772225%09red/gga:419126%09red/gga:423646%09red/gga:425389%09red/gga:418212%09red/gga:386582%09red/gga:100873157%09red/gga:395149%09red/gga:417739%09red/gga:395412%09red
NOD-like receptor signaling pathway	KEGG PATHWAY	gga04621	10	124	0.0107622	0.155579	IL18	ANTXR2	IFNAR2	ITPR2	CYBA	MAPK11	VDAC3	ITPR1	RIPK2	RNASEL	http://www.genome.jp/kegg-bin/show_pathway?gga04621/gga:426793%09red/gga:395312%09red/gga:420215%09red/gga:418212%09red/gga:422580%09red/gga:424410%09red/gga:417739%09red/gga:395412%09red/gga:395664%09red/gga:100859840%09red
Fatty acid metabolism	KEGG PATHWAY	gga01212	6	53	0.0110253	0.156275	HACD2	HTD2	OXSM	ECHS1	ACSBG2	ELOVL1	http://www.genome.jp/kegg-bin/show_pathway?gga01212/gga:424251%09red/gga:424564%09red/gga:420090%09red/gga:420656%09red/gga:770828%09red/gga:112533344%09red
Adherens junction	KEGG PATHWAY	gga04520	7	70	0.0113308	0.156275	TCF7	ACTN4	LMO7	CTNNB1	BAIAP2	NLK	CREBBP	http://www.genome.jp/kegg-bin/show_pathway?gga04520/gga:417669%09red/gga:395229%09red/gga:416667%09red/gga:396024%09red/gga:418815%09red/gga:395964%09red/gga:422077%09red
Basal transcription factors	KEGG PATHWAY	gga03022	5	38	0.0114637	0.156275	TAF5L	TAF6	TAF4	GTF2E1	TAF8	http://www.genome.jp/kegg-bin/show_pathway?gga03022/gga:107050330%09red/gga:418328%09red/gga:419223%09red/gga:421538%09red/gga:419929%09red
Nucleotide excision repair	KEGG PATHWAY	gga03420	5	38	0.0114637	0.156275	RFC4	DDB1	RFC1	ERCC5	POLE2	http://www.genome.jp/kegg-bin/show_pathway?gga03420/gga:374050%09red/gga:424958%09red/gga:423567%09red/gga:428019%09red/gga:422788%09red
Lysosome	KEGG PATHWAY	gga04142	9	110	0.0139513	0.17647	DNASE2B	ACP5	CTSH	GGA3	SMPD1	ATP6V0A2	CLTCL1	CTSS	GUSB	http://www.genome.jp/kegg-bin/show_pathway?gga04142/gga:427823%09red/gga:395473%09red/gga:424540%09red/gga:770109%09red/gga:416765%09red/gga:107057619%09red/gga:422121%09red/gga:425657%09red/gga:419077%09red
Necroptosis	KEGG PATHWAY	gga04217	10	131	0.0149869	0.177262	CAMK2D	FAS	BID	PARP1	SLC25A5	IFNAR2	TNFRSF10B	SMPD1	VPS4B	VDAC3	http://www.genome.jp/kegg-bin/show_pathway?gga04217/gga:395274%09red/gga:426793%09red/gga:772225%09red/gga:373904%09red/gga:395236%09red/gga:420901%09red/gga:396199%09red/gga:419077%09red/gga:422688%09red/gga:395664%09red
Citrate cycle (TCA cycle)	KEGG PATHWAY	gga00020	4	28	0.0181017	0.177262	FH	ACLY	IDH3B	MDH2	http://www.genome.jp/kegg-bin/show_pathway?gga00020/gga:420969%09red/gga:426573%09red/gga:417517%09red/gga:395373%09red
Base excision repair	KEGG PATHWAY	gga03410	4	29	0.0200927	0.18292	LIG3	POLE2	PARP1	UNG	http://www.genome.jp/kegg-bin/show_pathway?gga03410/gga:396199%09red/gga:374010%09red/gga:423567%09red/gga:417530%09red
DNA replication	KEGG PATHWAY	gga03030	4	31	0.0244654	0.192165	RFC4	RFC1	MCM2	POLE2	http://www.genome.jp/kegg-bin/show_pathway?gga03030/gga:424958%09red/gga:416027%09red/gga:423567%09red/gga:422788%09red
Nicotinate and nicotinamide metabolism	KEGG PATHWAY	gga00760	4	31	0.0244654	0.192165	NADK	QPRT	NT5DC4	NT5C3B	http://www.genome.jp/kegg-bin/show_pathway?gga00760/gga:419403%09red/gga:107051294%09red/gga:100858617%09red/gga:420034%09red
Fatty acid biosynthesis	KEGG PATHWAY	gga00061	3	17	0.0245103	0.192165	ACSBG2	OXSM	HTD2	http://www.genome.jp/kegg-bin/show_pathway?gga00061/gga:420090%09red/gga:112533344%09red/gga:420656%09red
Regulation of actin cytoskeleton	KEGG PATHWAY	gga04810	12	190	0.0289215	0.208879	CHRM4	SOS1	FGD3	ACTN4	PIP5K1C	ARPC2	ITGA3	MRAS	ITGA7	ITGB2	BAIAP2	SCIN	http://www.genome.jp/kegg-bin/show_pathway?gga04810/gga:415989%09red/gga:101749098%09red/gga:431192%09red/gga:396024%09red/gga:395149%09red/gga:420072%09red/gga:423195%09red/gga:429041%09red/gga:396181%09red/gga:373946%09red/gga:420588%09red/gga:422077%09red
Fanconi anemia pathway	KEGG PATHWAY	gga03460	5	50	0.0304164	0.208879	HES1	BRCA2	FANCA	FANCD2	FANCB	http://www.genome.jp/kegg-bin/show_pathway?gga03460/gga:418628%09red/gga:374139%09red/gga:415854%09red/gga:769039%09red/gga:415935%09red
Adrenergic signaling in cardiomyocytes	KEGG PATHWAY	gga04261	9	128	0.0314752	0.208879	RPS6KA5	MYH15	CAMK2D	CACNB1	TPM3	ADRB1	MAPK11	TNNC1	ATF2	http://www.genome.jp/kegg-bin/show_pathway?gga04261/gga:777366%09red/gga:423408%09red/gga:422688%09red/gga:101750705%09red/gga:396032%09red/gga:417739%09red/gga:770103%09red/gga:395727%09red/gga:395534%09red
Fructose and mannose metabolism	KEGG PATHWAY	gga00051	4	35	0.0348147	0.224548	SORD	HK2	PFKFB2	AKR1E2	http://www.genome.jp/kegg-bin/show_pathway?gga00051/gga:418171%09red/gga:374044%09red/gga:419850%09red/gga:415332%09red
Pentose and glucuronate interconversions	KEGG PATHWAY	gga00040	3	20	0.0355	0.224548	SORD	AKR1E2	GUSB	http://www.genome.jp/kegg-bin/show_pathway?gga00040/gga:418171%09red/gga:427823%09red/gga:415332%09red
RNA transport	KEGG PATHWAY	gga03013	9	132	0.0368348	0.224548	NUP133	NUP98	EIF2B2	STRAP	UPF3B	TGS1	RPP14	NUP214	THOC5	http://www.genome.jp/kegg-bin/show_pathway?gga03013/gga:421126%09red/gga:417019%09red/gga:418175%09red/gga:421535%09red/gga:430616%09red/gga:423359%09red/gga:100858231%09red/gga:416064%09red/gga:427760%09red
Homologous recombination	KEGG PATHWAY	gga03440	4	38	0.0440069	0.235361	BRCA2	XRCC2	XRCC3	TOPBP1	http://www.genome.jp/kegg-bin/show_pathway?gga03440/gga:374139%09red/gga:423485%09red/gga:420694%09red/gga:420438%09red
ABC transporters	KEGG PATHWAY	gga02010	4	40	0.0508188	0.247734	ABCD2	ABCC6	ABCB8	ABCC1	http://www.genome.jp/kegg-bin/show_pathway?gga02010/gga:416600%09red/gga:107055879%09red/gga:417694%09red/gga:395416%09red
Butanoate metabolism	KEGG PATHWAY	gga00650	3	24	0.0534342	0.247734	ECHS1	HMGCS2	BDH2	http://www.genome.jp/kegg-bin/show_pathway?gga00650/gga:422715%09red/gga:770828%09red/gga:424380%09red
Peroxisome	KEGG PATHWAY	gga04146	6	79	0.0540419	0.247734	PEX6	MPV17	BAAT	CAT	ABCD2	PHYH	http://www.genome.jp/kegg-bin/show_pathway?gga04146/gga:769879%09red/gga:417694%09red/gga:100857465%09red/gga:426601%09red/gga:423600%09red/gga:416709%09red
Synthesis and degradation of ketone bodies	KEGG PATHWAY	gga00072	2	10	0.0541418	0.247734	HMGCS2	BDH2	http://www.genome.jp/kegg-bin/show_pathway?gga00072/gga:422715%09red/gga:424380%09red
Fatty acid elongation	KEGG PATHWAY	gga00062	3	25	0.0584798	0.260339	ECHS1	HACD2	ELOVL1	http://www.genome.jp/kegg-bin/show_pathway?gga00062/gga:770828%09red/gga:424251%09red/gga:424564%09red
Pentose phosphate pathway	KEGG PATHWAY	gga00030	3	25	0.0584798	0.260339	RPIA	PGLS	PGM2	http://www.genome.jp/kegg-bin/show_pathway?gga00030/gga:430442%09red/gga:426435%09red/gga:422931%09red
Aminoacyl-tRNA biosynthesis	KEGG PATHWAY	gga00970	4	43	0.062053	0.263804	QRSL1	TARSL2	GARS	PARS2	http://www.genome.jp/kegg-bin/show_pathway?gga00970/gga:415389%09red/gga:421781%09red/gga:428403%09red/gga:424659%09red
Purine metabolism	KEGG PATHWAY	gga00230	8	125	0.0628419	0.264116	ENPP4	NUDT5	PGM2	NT5C3B	PRUNE1	GART	NT5DC4	ADK	http://www.genome.jp/kegg-bin/show_pathway?gga00230/gga:426435%09red/gga:427053%09red/gga:422055%09red/gga:423735%09red/gga:426368%09red/gga:395315%09red/gga:100858617%09red/gga:420034%09red
PPAR signaling pathway	KEGG PATHWAY	gga03320	5	64	0.0688518	0.281621	SLC27A4	PPARD	HMGCS2	ACSBG2	NR1H3	http://www.genome.jp/kegg-bin/show_pathway?gga03320/gga:417220%09red/gga:424380%09red/gga:395221%09red/gga:420090%09red/gga:395479%09red
Cardiac muscle contraction	KEGG PATHWAY	gga04260	5	66	0.0758471	0.296074	COX7A2	CACNB1	TPM3	MYH15	TNNC1	http://www.genome.jp/kegg-bin/show_pathway?gga04260/gga:770103%09red/gga:396032%09red/gga:777366%09red/gga:395534%09red/gga:772260%09red
C-type lectin receptor signaling pathway	KEGG PATHWAY	gga04625	6	87	0.076563	0.297812	IRF1	PTPN11	MRAS	MAPK11	ITPR2	ITPR1	http://www.genome.jp/kegg-bin/show_pathway?gga04625/gga:418212%09red/gga:395815%09red/gga:395149%09red/gga:417739%09red/gga:396384%09red/gga:395412%09red
Ribosome biogenesis in eukaryotes	KEGG PATHWAY	gga03008	5	67	0.0794836	0.297812	MDN1	MPHOSPH10	LSG1	NHP2	NAT10	http://www.genome.jp/kegg-bin/show_pathway?gga03008/gga:426609%09red/gga:424897%09red/gga:415384%09red/gga:421811%09red/gga:416218%09red
Biosynthesis of unsaturated fatty acids	KEGG PATHWAY	gga01040	3	30	0.0868292	0.315536	HACD2	BAAT	ELOVL1	http://www.genome.jp/kegg-bin/show_pathway?gga01040/gga:769879%09red/gga:424251%09red/gga:424564%09red
Melanogenesis	KEGG PATHWAY	gga04916	6	91	0.0895404	0.319978	TCF7	CAMK2D	CTNNB1	WNT5A	EDNRB	CREBBP	http://www.genome.jp/kegg-bin/show_pathway?gga04916/gga:395703%09red/gga:408082%09red/gga:416667%09red/gga:422688%09red/gga:395229%09red/gga:395964%09red
Salmonella infection	KEGG PATHWAY	gga05132	5	70	0.09094	0.320728	IL18	ARPC2	DYNC1I2	MAPK11	DYNC1LI2	http://www.genome.jp/kegg-bin/show_pathway?gga05132/gga:424151%09red/gga:429041%09red/gga:415793%09red/gga:395312%09red/gga:417739%09red
Ferroptosis	KEGG PATHWAY	gga04216	3	34	0.112893	0.362665	VDAC3	GCLM	GPX4	http://www.genome.jp/kegg-bin/show_pathway?gga04216/gga:426793%09red/gga:424492%09red/gga:374056%09red
Cell adhesion molecules (CAMs)	KEGG PATHWAY	gga04514	7	122	0.118446	0.374025	BLB1	ITGB2	GLG1	ALCAM	BF2	PTPRC	NCAM1	http://www.genome.jp/kegg-bin/show_pathway?gga04514/gga:693256%09red/gga:425389%09red/gga:396492%09red/gga:386580%09red/gga:396092%09red/gga:428253%09red/gga:396181%09red
Oocyte meiosis	KEGG PATHWAY	gga04114	6	99	0.118816	0.374025	PLK1	CAMK2D	MAPK11	ITPR2	ITPR1	CUL1	http://www.genome.jp/kegg-bin/show_pathway?gga04114/gga:418212%09red/gga:416575%09red/gga:417739%09red/gga:420783%09red/gga:395412%09red/gga:422688%09red
Galactose metabolism	KEGG PATHWAY	gga00052	3	35	0.119825	0.374025	HK2	AKR1E2	PGM2	http://www.genome.jp/kegg-bin/show_pathway?gga00052/gga:426435%09red/gga:374044%09red/gga:418171%09red
Glycosaminoglycan degradation	KEGG PATHWAY	gga00531	2	18	0.132171	0.396967	HYAL3	GUSB	http://www.genome.jp/kegg-bin/show_pathway?gga00531/gga:100859903%09red/gga:427823%09red
Spliceosome	KEGG PATHWAY	gga03040	6	107	0.152233	0.398477	SMNDC1	PLRG1	TCERG1	EFTUD2	PUF60	ZMAT2	http://www.genome.jp/kegg-bin/show_pathway?gga03040/gga:428281%09red/gga:426402%09red/gga:416349%09red/gga:427602%09red/gga:422401%09red/gga:423889%09red
Mismatch repair	KEGG PATHWAY	gga03430	2	20	0.154298	0.398477	RFC4	RFC1	http://www.genome.jp/kegg-bin/show_pathway?gga03430/gga:424958%09red/gga:422788%09red
GnRH signaling pathway	KEGG PATHWAY	gga04912	5	84	0.154481	0.398477	ITPR2	CAMK2D	ITPR1	MAPK11	SOS1	http://www.genome.jp/kegg-bin/show_pathway?gga04912/gga:395412%09red/gga:418212%09red/gga:431192%09red/gga:417739%09red/gga:422688%09red
Neomycin, kanamycin and gentamicin biosynthesis	KEGG PATHWAY	gga00524	1	5	0.17656	0.398477	HK2	http://www.genome.jp/kegg-bin/show_pathway?gga00524/gga:374044%09red
Other types of O-glycan biosynthesis	KEGG PATHWAY	gga00514	2	22	0.177065	0.398477	OGT	LFNG	http://www.genome.jp/kegg-bin/show_pathway?gga00514/gga:422203%09red/gga:395790%09red
Cysteine and methionine metabolism	KEGG PATHWAY	gga00270	3	43	0.180185	0.398477	KYAT3	MDH2	GCLM	http://www.genome.jp/kegg-bin/show_pathway?gga00270/gga:417517%09red/gga:424492%09red/gga:424517%09red
Focal adhesion	KEGG PATHWAY	gga04510	9	189	0.182148	0.398477	LAMA1	SOS1	ACTN4	ITGA3	ITGA7	CTNNB1	VEGFA	COL4A1	VWF	http://www.genome.jp/kegg-bin/show_pathway?gga04510/gga:395909%09red/gga:101749098%09red/gga:431192%09red/gga:419031%09red/gga:396024%09red/gga:374016%09red/gga:395530%09red/gga:373946%09red/gga:395964%09red
TGF-beta signaling pathway	KEGG PATHWAY	gga04350	5	90	0.186133	0.398477	TGFB1	RBL1	CUL1	CREBBP	RGMA	http://www.genome.jp/kegg-bin/show_pathway?gga04350/gga:416667%09red/gga:100873157%09red/gga:420783%09red/gga:419126%09red/gga:395214%09red
Cytosolic DNA-sensing pathway	KEGG PATHWAY	gga04623	3	44	0.188239	0.398477	IL18	POLR2H	POLR2K	http://www.genome.jp/kegg-bin/show_pathway?gga04623/gga:112529926%09red/gga:395312%09red/gga:424954%09red
Valine, leucine and isoleucine degradation	KEGG PATHWAY	gga00280	3	44	0.188239	0.398477	ECHS1	MCCC2L	HMGCS2	http://www.genome.jp/kegg-bin/show_pathway?gga00280/gga:770828%09red/gga:429115%09red/gga:424380%09red
Phosphatidylinositol signaling system	KEGG PATHWAY	gga04070	5	91	0.191625	0.398477	PIP5K1C	ITPR2	MTMR4	ITPR1	DGKE	http://www.genome.jp/kegg-bin/show_pathway?gga04070/gga:770911%09red/gga:395412%09red/gga:418212%09red/gga:420072%09red/gga:417472%09red
RNA polymerase	KEGG PATHWAY	gga03020	2	24	0.200304	0.398477	POLR2H	POLR2K	http://www.genome.jp/kegg-bin/show_pathway?gga03020/gga:112529926%09red/gga:424954%09red
Glycerophospholipid metabolism	KEGG PATHWAY	gga00564	5	94	0.208431	0.404306	PGS1	PCYT1A	LPIN1	PLA2G2E	DGKE	http://www.genome.jp/kegg-bin/show_pathway?gga00564/gga:770911%09red/gga:426747%09red/gga:421945%09red/gga:422087%09red/gga:424915%09red
Amino sugar and nucleotide sugar metabolism	KEGG PATHWAY	gga00520	3	48	0.221297	0.404306	GNPDA2	HK2	PGM2	http://www.genome.jp/kegg-bin/show_pathway?gga00520/gga:426435%09red/gga:374044%09red/gga:422772%09red
Vitamin B6 metabolism	KEGG PATHWAY	gga00750	1	7	0.2282	0.404306	PDXK	http://www.genome.jp/kegg-bin/show_pathway?gga00750/gga:418549%09red
Phosphonate and phosphinate metabolism	KEGG PATHWAY	gga00440	1	7	0.2282	0.404306	PCYT1A	http://www.genome.jp/kegg-bin/show_pathway?gga00440/gga:424915%09red
Cytokine-cytokine receptor interaction	KEGG PATHWAY	gga04060	9	202	0.232076	0.406045	IL18	TGFB1	IL1RL1	IL18RAP	FAS	IL18R1	IFNAR2	TNFRSF10B	IL1R1	http://www.genome.jp/kegg-bin/show_pathway?gga04060/gga:395274%09red/gga:101750396%09red/gga:395312%09red/gga:418717%09red/gga:396481%09red/gga:100873157%09red/gga:374136%09red/gga:373904%09red/gga:395664%09red
Calcium signaling pathway	KEGG PATHWAY	gga04020	8	180	0.251652	0.406045	CAMK2D	ITPR2	SLC25A5	ADRB1	TNNC1	VDAC3	EDNRB	ITPR1	http://www.genome.jp/kegg-bin/show_pathway?gga04020/gga:426793%09red/gga:408082%09red/gga:772225%09red/gga:418212%09red/gga:422688%09red/gga:101750705%09red/gga:396032%09red/gga:395412%09red
Riboflavin metabolism	KEGG PATHWAY	gga00740	1	8	0.252795	0.406045	ACP5	http://www.genome.jp/kegg-bin/show_pathway?gga00740/gga:107057619%09red
Glycolysis / Gluconeogenesis	KEGG PATHWAY	gga00010	3	53	0.264031	0.415857	HK2	ENO1	PGM2	http://www.genome.jp/kegg-bin/show_pathway?gga00010/gga:426435%09red/gga:374044%09red/gga:396017%09red
Ubiquinone and other terpenoid-quinone biosynthesis	KEGG PATHWAY	gga00130	1	9	0.276606	0.415857	COQ6	http://www.genome.jp/kegg-bin/show_pathway?gga00130/gga:423342%09red
Glyoxylate and dicarboxylate metabolism	KEGG PATHWAY	gga00630	2	31	0.283364	0.42432	MDH2	CAT	http://www.genome.jp/kegg-bin/show_pathway?gga00630/gga:417517%09red/gga:423600%09red
Propanoate metabolism	KEGG PATHWAY	gga00640	2	32	0.295256	0.426164	ACSS3	ECHS1	http://www.genome.jp/kegg-bin/show_pathway?gga00640/gga:770828%09red/gga:417875%09red
Pyruvate metabolism	KEGG PATHWAY	gga00620	2	32	0.295256	0.426164	FH	MDH2	http://www.genome.jp/kegg-bin/show_pathway?gga00620/gga:420969%09red/gga:417517%09red
Taurine and hypotaurine metabolism	KEGG PATHWAY	gga00430	1	10	0.29966	0.426164	BAAT	http://www.genome.jp/kegg-bin/show_pathway?gga00430/gga:769879%09red
Fatty acid degradation	KEGG PATHWAY	gga00071	2	33	0.307119	0.434893	ECHS1	ACSBG2	http://www.genome.jp/kegg-bin/show_pathway?gga00071/gga:770828%09red/gga:420090%09red
Starch and sucrose metabolism	KEGG PATHWAY	gga00500	2	33	0.307119	0.434893	HK2	PGM2	http://www.genome.jp/kegg-bin/show_pathway?gga00500/gga:426435%09red/gga:374044%09red
Mitophagy - animal	KEGG PATHWAY	gga04137	3	58	0.307647	0.435172	AMBRA1	OPTN	MRAS	http://www.genome.jp/kegg-bin/show_pathway?gga04137/gga:423194%09red/gga:395149%09red/gga:374079%09red
Gap junction	KEGG PATHWAY	gga04540	4	84	0.307969	0.435393	ITPR2	ADRB1	ITPR1	SOS1	http://www.genome.jp/kegg-bin/show_pathway?gga04540/gga:395412%09red/gga:101750705%09red/gga:418212%09red/gga:431192%09red
Pyrimidine metabolism	KEGG PATHWAY	gga00240	3	59	0.316417	0.438699	NT5DC4	TK2	NT5C3B	http://www.genome.jp/kegg-bin/show_pathway?gga00240/gga:427551%09red/gga:100858617%09red/gga:420034%09red
Drug metabolism - cytochrome P450	KEGG PATHWAY	gga00982	2	34	0.318943	0.438699	PRRC2C	FMO3	http://www.genome.jp/kegg-bin/show_pathway?gga00982/gga:424393%09red/gga:395267%09red
Oxidative phosphorylation	KEGG PATHWAY	gga00190	5	113	0.323281	0.440244	NDUFB7	COX7A2	ATP6V1E1	PPA2	ATP6V0A2	http://www.genome.jp/kegg-bin/show_pathway?gga00190/gga:422539%09red/gga:107050898%09red/gga:395473%09red/gga:418162%09red/gga:772260%09red
Biosynthesis of amino acids	KEGG PATHWAY	gga01230	3	60	0.325191	0.442388	ENO1	IDH3B	RPIA	http://www.genome.jp/kegg-bin/show_pathway?gga01230/gga:426573%09red/gga:422931%09red/gga:396017%09red
Glycerolipid metabolism	KEGG PATHWAY	gga00561	3	60	0.325191	0.442388	LPIN1	AKR1E2	DGKE	http://www.genome.jp/kegg-bin/show_pathway?gga00561/gga:770911%09red/gga:418171%09red/gga:421945%09red
Intestinal immune network for IgA production	KEGG PATHWAY	gga04672	2	36	0.342433	0.455177	BLB1	TGFB1	http://www.genome.jp/kegg-bin/show_pathway?gga04672/gga:693256%09red/gga:100873157%09red
Non-homologous end-joining	KEGG PATHWAY	gga03450	1	12	0.343589	0.455177	PRKDC	http://www.genome.jp/kegg-bin/show_pathway?gga03450/gga:395376%09red
Vascular smooth muscle contraction	KEGG PATHWAY	gga04270	5	117	0.348529	0.460794	ITPR2	ARHGEF11	MRVI1	ITPR1	PLA2G2E	http://www.genome.jp/kegg-bin/show_pathway?gga04270/gga:426747%09red/gga:418212%09red/gga:423037%09red/gga:395412%09red/gga:425979%09red
AGE-RAGE signaling pathway in diabetic complications	KEGG PATHWAY	gga04933	4	90	0.351464	0.463743	TGFB1	VEGFA	MAPK11	COL4A1	http://www.genome.jp/kegg-bin/show_pathway?gga04933/gga:395530%09red/gga:395909%09red/gga:100873157%09red/gga:417739%09red
Adipocytokine signaling pathway	KEGG PATHWAY	gga04920	3	64	0.360237	0.465999	PTPN11	PRKAG2	ACSBG2	http://www.genome.jp/kegg-bin/show_pathway?gga04920/gga:395815%09red/gga:420435%09red/gga:420090%09red
2-Oxocarboxylic acid metabolism	KEGG PATHWAY	gga01210	1	13	0.36451	0.465999	IDH3B	http://www.genome.jp/kegg-bin/show_pathway?gga01210/gga:426573%09red
p53 signaling pathway	KEGG PATHWAY	gga04115	3	66	0.37767	0.476834	FAS	BID	CD82	http://www.genome.jp/kegg-bin/show_pathway?gga04115/gga:395274%09red/gga:423172%09red/gga:395236%09red
Glycosphingolipid biosynthesis - ganglio series	KEGG PATHWAY	gga00604	1	14	0.384766	0.476834	ST3GAL5	http://www.genome.jp/kegg-bin/show_pathway?gga00604/gga:407775%09red
Phenylalanine metabolism	KEGG PATHWAY	gga00360	1	14	0.384766	0.476834	DDC	http://www.genome.jp/kegg-bin/show_pathway?gga00360/gga:420947%09red
Selenocompound metabolism	KEGG PATHWAY	gga00450	1	15	0.404376	0.490962	KYAT3	http://www.genome.jp/kegg-bin/show_pathway?gga00450/gga:424517%09red
Primary bile acid biosynthesis	KEGG PATHWAY	gga00120	1	15	0.404376	0.490962	BAAT	http://www.genome.jp/kegg-bin/show_pathway?gga00120/gga:769879%09red
Arginine and proline metabolism	KEGG PATHWAY	gga00330	2	42	0.411089	0.497963	L3HYPDH	CKB	http://www.genome.jp/kegg-bin/show_pathway?gga00330/gga:396248%09red/gga:423531%09red
Ubiquitin mediated proteolysis	KEGG PATHWAY	gga04120	5	127	0.411861	0.498394	TRIP12	DDB1	WWP2	CUL1	UBE2D1	http://www.genome.jp/kegg-bin/show_pathway?gga04120/gga:374050%09red/gga:423641%09red/gga:420783%09red/gga:424785%09red/gga:415868%09red
RNA degradation	KEGG PATHWAY	gga03018	3	70	0.412202	0.498394	ENO1	PNPT1	HSPA9	http://www.genome.jp/kegg-bin/show_pathway?gga03018/gga:421206%09red/gga:416183%09red/gga:396017%09red
Glycosaminoglycan biosynthesis - keratan sulfate	KEGG PATHWAY	gga00533	1	16	0.423363	0.501968	FUT8	http://www.genome.jp/kegg-bin/show_pathway?gga00533/gga:423178%09red
One carbon pool by folate	KEGG PATHWAY	gga00670	1	17	0.441745	0.514034	GART	http://www.genome.jp/kegg-bin/show_pathway?gga00670/gga:395315%09red
Steroid biosynthesis	KEGG PATHWAY	gga00100	1	17	0.441745	0.514034	FDFT1	http://www.genome.jp/kegg-bin/show_pathway?gga00100/gga:422038%09red
Glutathione metabolism	KEGG PATHWAY	gga00480	2	47	0.465505	0.533193	GCLM	GPX4	http://www.genome.jp/kegg-bin/show_pathway?gga00480/gga:424492%09red/gga:374056%09red
Terpenoid backbone biosynthesis	KEGG PATHWAY	gga00900	1	19	0.476771	0.542085	HMGCS2	http://www.genome.jp/kegg-bin/show_pathway?gga00900/gga:424380%09red
Arachidonic acid metabolism	KEGG PATHWAY	gga00590	2	49	0.486427	0.55211	PLA2G2E	CYP2U1	http://www.genome.jp/kegg-bin/show_pathway?gga00590/gga:426747%09red/gga:422528%09red
Porphyrin and chlorophyll metabolism	KEGG PATHWAY	gga00860	1	23	0.540377	0.596364	GUSB	http://www.genome.jp/kegg-bin/show_pathway?gga00860/gga:427823%09red
Mannose type O-glycan biosynthesis	KEGG PATHWAY	gga00515	1	23	0.540377	0.596364	B3GALNT2	http://www.genome.jp/kegg-bin/show_pathway?gga00515/gga:430770%09red
Autophagy - animal	KEGG PATHWAY	gga04140	4	117	0.540824	0.596608	AMBRA1	MTMR4	MRAS	ITPR1	http://www.genome.jp/kegg-bin/show_pathway?gga04140/gga:423194%09red/gga:395149%09red/gga:395412%09red/gga:417472%09red
Apelin signaling pathway	KEGG PATHWAY	gga04371	4	119	0.553813	0.606937	ITPR2	PRKAG2	MRAS	ITPR1	http://www.genome.jp/kegg-bin/show_pathway?gga04371/gga:418212%09red/gga:395412%09red/gga:395149%09red/gga:420435%09red
Glycosaminoglycan biosynthesis - heparan sulfate / heparin	KEGG PATHWAY	gga00534	1	24	0.555032	0.606937	EXT2	http://www.genome.jp/kegg-bin/show_pathway?gga00534/gga:425859%09red
RIG-I-like receptor signaling pathway	KEGG PATHWAY	gga04622	2	57	0.564776	0.616566	IFIH1	MAPK11	http://www.genome.jp/kegg-bin/show_pathway?gga04622/gga:424185%09red/gga:417739%09red
Drug metabolism - other enzymes	KEGG PATHWAY	gga00983	2	57	0.564776	0.616566	TK2	GUSB	http://www.genome.jp/kegg-bin/show_pathway?gga00983/gga:427551%09red/gga:427823%09red
Insulin signaling pathway	KEGG PATHWAY	gga04910	4	121	0.566604	0.617322	HK2	PRKAG2	FLOT1	SOS1	http://www.genome.jp/kegg-bin/show_pathway?gga04910/gga:420435%09red/gga:101751397%09red/gga:431192%09red/gga:374044%09red
alpha-Linolenic acid metabolism	KEGG PATHWAY	gga00592	1	25	0.569222	0.617322	PLA2G2E	http://www.genome.jp/kegg-bin/show_pathway?gga00592/gga:426747%09red
VEGF signaling pathway	KEGG PATHWAY	gga04370	2	58	0.573944	0.62193	VEGFA	MAPK11	http://www.genome.jp/kegg-bin/show_pathway?gga04370/gga:395909%09red/gga:417739%09red
Tight junction	KEGG PATHWAY	gga04530	5	156	0.585553	0.629583	MYH11	SLC9A3R1	PRKAG2	MYH9	ACTN4	http://www.genome.jp/kegg-bin/show_pathway?gga04530/gga:422108%09red/gga:396024%09red/gga:420435%09red/gga:396469%09red/gga:396211%09red
Linoleic acid metabolism	KEGG PATHWAY	gga00591	1	28	0.609135	0.648122	PLA2G2E	http://www.genome.jp/kegg-bin/show_pathway?gga00591/gga:426747%09red
Folate biosynthesis	KEGG PATHWAY	gga00790	1	28	0.609135	0.648122	AKR1E2	http://www.genome.jp/kegg-bin/show_pathway?gga00790/gga:418171%09red
SNARE interactions in vesicular transport	KEGG PATHWAY	gga04130	1	29	0.621601	0.657597	STX8	http://www.genome.jp/kegg-bin/show_pathway?gga04130/gga:417321%09red
beta-Alanine metabolism	KEGG PATHWAY	gga00410	1	29	0.621601	0.657597	ECHS1	http://www.genome.jp/kegg-bin/show_pathway?gga00410/gga:770828%09red
mRNA surveillance pathway	KEGG PATHWAY	gga03015	2	70	0.672943	0.703982	UPF3B	DAZAP1	http://www.genome.jp/kegg-bin/show_pathway?gga03015/gga:427266%09red/gga:100858231%09red
mTOR signaling pathway	KEGG PATHWAY	gga04150	4	140	0.677172	0.706413	WNT5A	ATP6V1E1	SOS1	LRP5	http://www.genome.jp/kegg-bin/show_pathway?gga04150/gga:423114%09red/gga:395703%09red/gga:418162%09red/gga:431192%09red
Tyrosine metabolism	KEGG PATHWAY	gga00350	1	34	0.678221	0.706413	DDC	http://www.genome.jp/kegg-bin/show_pathway?gga00350/gga:420947%09red
Inositol phosphate metabolism	KEGG PATHWAY	gga00562	2	71	0.680288	0.707725	PIP5K1C	MTMR4	http://www.genome.jp/kegg-bin/show_pathway?gga00562/gga:420072%09red/gga:417472%09red
Proteasome	KEGG PATHWAY	gga03050	1	35	0.688486	0.715123	PSMC1	http://www.genome.jp/kegg-bin/show_pathway?gga03050/gga:395804%09red
Glycine, serine and threonine metabolism	KEGG PATHWAY	gga00260	1	37	0.708045	0.732835	SARDH	http://www.genome.jp/kegg-bin/show_pathway?gga00260/gga:417146%09red
Steroid hormone biosynthesis	KEGG PATHWAY	gga00140	1	37	0.708045	0.732835	STS	http://www.genome.jp/kegg-bin/show_pathway?gga00140/gga:418654%09red
Progesterone-mediated oocyte maturation	KEGG PATHWAY	gga04914	2	78	0.727982	0.74788	PLK1	MAPK11	http://www.genome.jp/kegg-bin/show_pathway?gga04914/gga:417739%09red/gga:416575%09red
ErbB signaling pathway	KEGG PATHWAY	gga04012	2	78	0.727982	0.74788	CAMK2D	SOS1	http://www.genome.jp/kegg-bin/show_pathway?gga04012/gga:431192%09red/gga:422688%09red
Hedgehog signaling pathway	KEGG PATHWAY	gga04340	1	41	0.743561	0.760027	CUL1	http://www.genome.jp/kegg-bin/show_pathway?gga04340/gga:420783%09red
Toll-like receptor signaling pathway	KEGG PATHWAY	gga04620	2	84	0.763932	0.777827	IFNAR2	MAPK11	http://www.genome.jp/kegg-bin/show_pathway?gga04620/gga:395664%09red/gga:417739%09red
Ether lipid metabolism	KEGG PATHWAY	gga00565	1	44	0.767336	0.780387	PLA2G2E	http://www.genome.jp/kegg-bin/show_pathway?gga00565/gga:426747%09red
Sphingolipid metabolism	KEGG PATHWAY	gga00600	1	45	0.774761	0.78733	SMPD1	http://www.genome.jp/kegg-bin/show_pathway?gga00600/gga:419077%09red
N-Glycan biosynthesis	KEGG PATHWAY	gga00510	1	49	0.80217	0.812046	FUT8	http://www.genome.jp/kegg-bin/show_pathway?gga00510/gga:423178%09red
Neuroactive ligand-receptor interaction	KEGG PATHWAY	gga04080	6	333	0.960989	0.962086	GPR156	CHRM4	ADRB1	C3	EDNRB	C5	http://www.genome.jp/kegg-bin/show_pathway?gga04080/gga:408082%09red/gga:418333%09red/gga:101750705%09red/gga:423195%09red/gga:417122%09red/gga:396370%09red
--------------------
#Term	Database	ID	Input number	Background number	P-Value	Corrected P-Value	Input	Hyperlink
--------------------
#Term	Database	ID	Input number	Background number	P-Value	Corrected P-Value	Input	Hyperlink
nucleoplasm	Gene Ontology	GO:0005654	121	1526	3.38449e-18	8.9046e-15	SMARCC2	HSF2	ERGIC1	PUF60	SRSF11	VPS37A	MAFF	ARID1B	GOLGA4	CBFA2T3	PHC1	MYCBP2	PHC3	LIG3	CREBRF	SLC26A11	NABP2	BRCA2	VRK1	NUF2	ARL14EP	RFC1	TAF1A	ANXA11	RPL11	CENPU	THOC5	PTPN13	MAF1	KIN	NUCKS1	ACLY	CLUAP1	PDXK	FUBP1	COPS5	GTF3C1	XRCC3	XRCC2	MMS19	CHD7	PARPBP	NAIF1
cytosol	Gene Ontology	GO:0005829	143	2089	2.78068e-16	3.65799e-13	FAM160A2	IL1RL1	CKB	VPS37A	PDCD10	HSBP1L1	SPG21	FMNL2	WWC2	COMMD1	YLPM1	STRAP	FLII	CREBRF	NABP2	DUS2	CTSH	BRCA2	VRK1	NAA15	STX8	ARL14EP	LSG1	STK4	EFTUD2	CARHSP1	PTPN13	ARID1B	ACLY	STK38L	RNF213	PPA2	HMMR	PDXK	METAP2	HSP90B1	COPS5	ACSBG2	XRCC3	NGLY1	SERPINE2	GTF2E1	PPM1B
nucleus	Gene Ontology	GO:0005634	152	2478	1.63553e-13	1.21586e-10	HSF2	WWP2	SATB1	TBX21	PRKAG2	PKP4	NAIF1	TARSL2	CENPU	MAFF	EFTUD2	OTUD7B	TRUB1	APBB1	CBFA2T3	ADK	TLE3	PHC1	MYCBP2	PHC3	ZNF236	PTBP1	METTL16	RALGAPA1	RAD18	VRK1	VRK2	RFC1	MTUS1	STK4	PSMC1	MIPOL1	SETD2	SYNCRIP	PTPN13	PHB	PTPN11	SWT1	DBF4	KIN	MAF1	KDM5B	MAPK11
cytoplasm	Gene Ontology	GO:0005737	144	2299	1.84851e-13	1.21586e-10	HSF2	WWP2	GNPDA2	HSPA9	PRKAG2	SBF2	CYP2W1	TARSL2	TRMT12	OTUD7B	CCDC88C	APBB1	PLK1	FLII	BRD2	LIG3	MTMR4	METTL16	RALGAPA1	DUS2	ARHGEF11	VRK1	VRK2	CAMK2D	RSPRY1	PER2	KLHL2	CENPU	THOC5	CARHSP1	PCYT1A	TNKS2	KCTD17	PTPN13	MAF1	PTPN11	EIF2A	PKP4	PHB	ICK	STMN1	PGLS	FUBP1
ATP binding	Gene Ontology	GO:0005524	86	1073	2.51282e-13	1.32225e-10	CKB	PLK1	HSPA9	PRKAG2	PRPF4B	TARSL2	GRK6	PARS2	LIG3	LYN	ABCD2	RNASEL	VRK1	VRK2	CAMK2D	SCYL3	STK4	MST1R	ACLY	STK38L	RNF213	KIF11	PDXK	INO80	HSP90B1	UBE2D1	MYO18B	ACSBG2	PGS1	XRCC3	XRCC2	DHX37	CHD2	CHD7	CCT2	SMARCAD1	NLK	ALPK1	DALRD3	EPHB6	ATP10D	TK2	DYNC1LI2
nucleolus	Gene Ontology	GO:0005730	45	446	2.54015e-10	1.11385e-07	MDN1	RPS14	RPL3	PRKDC	DCAF13	GTF3C1	RRP12	FANCD2	AKAP11	VRK1	DHX37	N4BP1	CHD7	CBFA2T3	NUB1	MTX2	NCL	ABCB8	NOL11	SURF6	MIDN	NIFK	MCM10	SPATS2L	ARL14EP	RSL24D1	PARP1	MTUS1	RPL11	RPL12	ITPR1	NPM1	DEDD	NAT10	BCL9L	MAF1	RPAP2	ADARB1	UPF3B	RPP14	ILF3	NUCKS1	SIRT1
histone binding	Gene Ontology	GO:0042393	17	98	1.42266e-07	5.34717e-05	SMARCC2	SIRT1	CHD2	NAP1L1	NAP1L4	INO80	RSF1	APBB1	PHC1	MCM2	PHC3	SART3	NASP	UBXN7	NPM1	SMARCA5	KDM5B	http://amigo.geneontology.org/amigo/term/GO:0042393
mitochondrion	Gene Ontology	GO:0005739	47	617	3.29456e-07	0.00010835	PARS2	MTERF3	PNPT1	TSPOAP1	MCCC2L	NUBPL	CAT	FDXR	MDH2	ACSBG2	PGS1	FH	XRCC3	IDE	GART	MAFF	QRSL1	IDH3B	DISC1	AASS	TRUB1	BID	OXSM	NAIF1	MTG1	HK2	LIG3	TMEM71	KYAT3	HSPA9	MRPL37	SIRT1	LIAS	MRPL18	AMBRA1	PARP1	MRPL39	NUDT13	UNG	TOMM70	PHB	HMGCS2	RPP14
RNA binding	Gene Ontology	GO:0003723	32	365	1.73316e-06	0.00050666	RBM6	RPS16	RPS15	RPL3	HSP90B1	PUF60	NHP2	PUSL1	DHX37	DDX59	TRUB1	RBM39	RNASEL	SURF6	NIFK	SMNDC1	MRPS5	SFPQ	RPL11	HTATSF1	SETX	NPM1	HNRNPUL1	SYNCRIP	SUGP2	METTL16	HBP1	TARBP1	NCL	KIN	RSL24D1	SRSF11	http://amigo.geneontology.org/amigo/term/GO:0003723
plasma membrane	Gene Ontology	GO:0005886	87	1580	3.73994e-06	0.000983977	SYTL2	REM1	NIPA1	IFNAR2	PKP4	PDCD10	APBB1	BF2	SLC34A2	SCN4A	SIRPA	ARL14EP	TNFRSF10B	PTPN13	ARID1B	PHB	SPPL2A	ACLY	METAP2	SERINC1	INO80	HSP90B1	CHL1	VANGL2	PREX2	CSDE1	AMER1	SLC9A9	NAIF1	LANCL3	SLC5A10	FAM129A	KBP	RALGPS1	MRAS	ITPR2	SLC39A3	PLEK	RHBDF2	FLOT1	ATP6V0A2	RRP12	BAIAP2
nuclear body	Gene Ontology	GO:0016604	20	178	5.81029e-06	0.00138972	TCF7	MAU2	KMT2E	ACTN4	FAS	RAD18	INO80	PARP1	DBF4	STK4	STK35	FANCD2	AMER1	CREBRF	DCAF7	NUP98	UBXN7	SUGP2	CREBBP	SETX	http://amigo.geneontology.org/amigo/term/GO:0016604
protein C-terminus binding	Gene Ontology	GO:0008022	15	106	7.26055e-06	0.00159188	LAMA1	SIRT1	OPTN	PEX6	HESX1	PHB	VPS36	MED12	CTNNB1	PRRC2C	PHB2	BRCA2	HSPG2	VPS4B	MAPRE3	http://amigo.geneontology.org/amigo/term/GO:0008022
identical protein binding	Gene Ontology	GO:0042802	45	678	1.67771e-05	0.00339543	IFIH1	HSF2	GIPC2	GNPDA2	RAD18	TCERG1	SIRT1	PUF60	MCM10	CBX3	GART	HTRA3	QPRT	OPTN	SUN2	ALCAM	CCDC88C	RB1	GP1BB	PLK1	RPIA	MYCBP2	OFD1	SETX	MAPRE3	ZBED1	PHYKPL	TDO2	PDIA3	PARP1	SCYL3	SORD	KLHL2	MIPOL1	VWF	E2F7	KCTD17	TOPBP1	ALB	BRCA2	GPX4	FAS	BAIAP2
DNA binding	Gene Ontology	GO:0003677	31	403	2.78286e-05	0.00477151	IFIH1	RFC1	INO80	PRKDC	RC3H2	SMARCA5	POLE2	CHD7	PARPBP	ZHX3	ASXL2	LIG3	SMARCAD1	NABP2	SURF6	ZBED4	PARP1	DEDD	POLR2K	E2F7	TAF6	TAF4	THAP5	ARID1B	TIPIN	ALB	NCL	KDM5B	ILF2	ILF3	ATF2	http://amigo.geneontology.org/amigo/term/GO:0003677
negative regulation of cell population proliferation	Gene Ontology	GO:0008285	19	184	2.90171e-05	0.00477151	E2F7	PODN	IRF1	ZBTB17	PHB	SLC9A3R1	KAT2B	CBFA2T3	ADARB1	CTNNB1	DLL1	STK4	RB1	ING4	TNS2	NPM1	AMBRA1	SERPINE2	SCIN	http://amigo.geneontology.org/amigo/term/GO:0008285
magnesium ion binding	Gene Ontology	GO:0000287	17	154	3.50939e-05	0.0054313	ICK	MYH11	IDH3B	PPM1B	PLK1	ADPRH	ATP10D	NUDT5	PGM2	NT5C3B	ENO1	PDXK	STK4	PPA2	NLK	STK38L	RPS6KA5	http://amigo.geneontology.org/amigo/term/GO:0000287
magnesium ion transport	Gene Ontology	GO:0015693	5	9	5.10314e-05	0.00712023	MRS2	NIPAL1	NIPA1	NIPAL3	CNNM4	http://amigo.geneontology.org/amigo/term/GO:0015693
structural constituent of ribosome	Gene Ontology	GO:0003735	15	128	5.38567e-05	0.00712023	MRPL10	MRPL37	RPS16	RPS15	RPS14	MRPL18	MRPS5	RPLP0	MRPS22	RPL3	RPS15A	RPL11	RPL12	RSL24D1	RPS2	http://amigo.geneontology.org/amigo/term/GO:0003735
iron-sulfur cluster assembly	Gene Ontology	GO:0016226	6	17	6.50449e-05	0.00814919	CIAO1	NDOR1	HSPA9	NUBPL	NUBP2	MMS19	http://amigo.geneontology.org/amigo/term/GO:0016226
nucleosome assembly	Gene Ontology	GO:0006334	7	28	9.99897e-05	0.0119579	NAP1L1	NAP1L4	RSF1	MCM2	SART3	SMARCA5	BRD2	http://amigo.geneontology.org/amigo/term/GO:0006334
ribosomal large subunit assembly	Gene Ontology	GO:0000027	6	19	0.000108072	0.0121498	MDN1	RPLP0	RPL3	RPL11	RPL12	RSL24D1	http://amigo.geneontology.org/amigo/term/GO:0000027
enzyme binding	Gene Ontology	GO:0019899	14	122	0.000115922	0.0121498	MCM10	TNKS2	KMT2E	RFC4	MCM2	MST1R	PRKDC	HACD2	CAT	MMS19	DDC	COPS5	HNRNPUL1	RPS2	http://amigo.geneontology.org/amigo/term/GO:0019899
protein homodimerization activity	Gene Ontology	GO:0042803	31	438	0.000117171	0.0121498	GRPEL2	HSF2	PHB2	MYOM1	CAT	KIAA1524	RIPK2	PDCD10	IDE	ZHX3	COMMD1	NR2F2	TMEM266	PDXK	GOLGA5	KYAT3	GLIPR2	EXT2	MYH9	DAB2IP	NUDT5	APPL1	SFPQ	STK4	VPS4B	PLEK	STARD3NL	RAB11FIP3	ABCD2	ACTN4	SPPL2A	http://amigo.geneontology.org/amigo/term/GO:0042803
translation	Gene Ontology	GO:0006412	13	107	0.000120067	0.0121498	MRPL10	MRPL37	RPS16	RPS15	RPS14	MRPL18	MRPS5	RPL3	RPS15A	FAU	RPS2	RPL12	RSL24D1	http://amigo.geneontology.org/amigo/term/GO:0006412
transcription coactivator activity	Gene Ontology	GO:0003713	15	140	0.000134867	0.0131413	TAF6	SIRT1	LPIN1	WBP2NL	NUP98	KAT2B	CTNNB1	MED12	MAPK11	ING4	BCL9L	TAF5L	TADA1	CREBBP	MMS19	http://amigo.geneontology.org/amigo/term/GO:0003713
neural tube closure	Gene Ontology	GO:0001843	9	53	0.000144353	0.0131413	PLXNB2	TGFB1	LIAS	IFT57	MED12	COBL	SETD2	BRD2	RGMA	http://amigo.geneontology.org/amigo/term/GO:0001843
response to virus	Gene Ontology	GO:0009615	7	30	0.000144849	0.0131413	IFIH1	TBX21	MST1R	ALB	RPS15A	HYAL3	HNRNPUL1	http://amigo.geneontology.org/amigo/term/GO:0009615
magnesium ion transmembrane transporter activity	Gene Ontology	GO:0015095	5	13	0.000196419	0.0172259	MRS2	NIPAL1	NIPA1	NIPAL3	CNNM4	http://amigo.geneontology.org/amigo/term/GO:0015095
chromatin remodeling	Gene Ontology	GO:0006338	9	56	0.000208954	0.0177341	NUDT5	CHD7	KAT2B	RSF1	INO80	SATB1	ATRX	NPM1	KDM5B	http://amigo.geneontology.org/amigo/term/GO:0006338
actin filament binding	Gene Ontology	GO:0051015	16	164	0.000220111	0.0177418	MYH11	MYOM1	CTNNAL1	MYH15	ACTN4	FMNL2	ARPC2	MYH9	CAPZA2	MPRIP	CORO1C	FLII	TNNC1	SVIL	PPP1R9B	SCIN	http://amigo.geneontology.org/amigo/term/GO:0051015
negative regulation of transcription by RNA polymerase II	Gene Ontology	GO:0000122	34	520	0.000229463	0.0177418	SMARCC2	TGFB1	WWP2	RPS14	TBX21	TCERG1	TCF7	CTNNB1	STRAP	OTUD7B	PLK1	WWC2	APBB1	RB1	NR2F2	HESX1	HNRNPA2B1	NR1H3	SIRT1	HHEX	RBL1	ASCL3	DAB2IP	PER2	PPARD	DLL4	SATB1	E2F7	MGA	PHB	SFPQ	HBP1	NPTXR	CREBBP	http://amigo.geneontology.org/amigo/term/GO:0000122
chromatin	Gene Ontology	GO:0000785	10	71	0.000247783	0.0177418	MAU2	RBL1	PARPBP	PLK1	RB1	COPS5	SFPQ	MCM2	TRIM45	WAPL	http://amigo.geneontology.org/amigo/term/GO:0000785
Cul4-RING E3 ubiquitin ligase complex	Gene Ontology	GO:0080008	5	14	0.000259605	0.0177418	DCAF13	DCAF7	DDB1	DCAF17	PLRG1	http://amigo.geneontology.org/amigo/term/GO:0080008
integral component of membrane	Gene Ontology	GO:0016021	117	2565	0.00026002	0.0177418	IL1RL1	NIPA1	ZDHHC18	IFNAR2	GLG1	CYP2W1	SLC25A10	BF2	SLC34A2	GOLGA5	TMEM59	ABCD2	GINM1	FMO3	CYP4B7	CTNNAL1	EXT2	SIRPA	VRK2	ENPP4	B3GALNT2	CD5	PTPN11	ORMDL1	TRAPPC5	ADAM9	SERINC1	MFSD11	GOLT1A	SLC25A30	CHL1	VANGL2	IL1R1	F5	ARL6IP5	SLC9A9	SLC5A10	PLEKHB2	DNAJB14	TMEM71	CHIR-B6	FDFT1	MPV17
protein-containing complex	Gene Ontology	GO:0032991	20	240	0.000273391	0.0177418	NASP	GPX4	SPATS2L	CNNM4	KMT2E	VRK2	PHB2	PTPN11	MYH9	ALB	CAT	SORD	RIPK2	STK4	KIF11	C3	LYN	CLSTN3	RBM39	KIN	http://amigo.geneontology.org/amigo/term/GO:0032991
activation of MAPKKK activity	Gene Ontology	GO:0000185	4	7	0.000281971	0.0177418	DAB2IP	MAP4K3	MAP4K5	TRAF7	http://amigo.geneontology.org/amigo/term/GO:0000185
negative regulation of phosphatidylinositol 3-kinase signaling	Gene Ontology	GO:0014067	4	7	0.000281971	0.0177418	SLC9A3R1	STAMBP	DAB2IP	SERPINE2	http://amigo.geneontology.org/amigo/term/GO:0014067
positive regulation of transcription, DNA-templated	Gene Ontology	GO:0045893	19	222	0.000282715	0.0177418	SMARCC2	WBP2NL	MMS19	CREBBP	KMT2E	ARID1B	PHB	ARHGEF11	MAPRE3	APBB1	RSF1	NR2F2	BRCA2	MAPK11	EDRF1	NAA15	TRIM45	ILF3	ILF2	http://amigo.geneontology.org/amigo/term/GO:0045893
double-stranded DNA binding	Gene Ontology	GO:0003690	7	34	0.000283222	0.0177418	MCM10	MTERF3	NUCKS1	PRKDC	MAU2	KIN	DDX60	http://amigo.geneontology.org/amigo/term/GO:0003690
chromatin binding	Gene Ontology	GO:0003682	23	300	0.000303809	0.0185889	SMARCC2	HESX1	KAT2B	CTNNB1	NAP1L1	ASXL2	NAP1L4	APBB1	MED12	PHC1	PRIMPOL	SMARCAD1	HHEX	PHC3	SFPQ	SATB1	ATRX	NPM1	BRD2	NUCKS1	CDC45	CREBBP	ATF2	http://amigo.geneontology.org/amigo/term/GO:0003682
apoptotic process	Gene Ontology	GO:0006915	12	104	0.000334107	0.0197095	CTSH	IRF1	IFT57	TRAF7	OGT	PARP1	RB1	ING4	STK4	MCM2	EXFABP	CUL1	http://amigo.geneontology.org/amigo/term/GO:0006915
cellular response to interleukin-4	Gene Ontology	GO:0071353	5	15	0.000337107	0.0197095	TCF7	RPLP0	RPL3	MCM2	RPS2	http://amigo.geneontology.org/amigo/term/GO:0071353
ribonucleoprotein complex	Gene Ontology	GO:1990904	10	75	0.000368325	0.0206183	DAZAP1	NUP98	ACTN4	EFTUD2	GTF3C1	SYNCRIP	EEFSEC	NPM1	ILF3	ILF2	http://amigo.geneontology.org/amigo/term/GO:1990904
single-stranded DNA binding	Gene Ontology	GO:0003697	10	75	0.000368325	0.0206183	BRCA2	FUBP3	RAD18	ERCC5	MCM10	MCM2	NUCKS1	CDC45	POLR2H	MCM8	http://amigo.geneontology.org/amigo/term/GO:0003697
intermediate filament cytoskeleton	Gene Ontology	GO:0045111	6	25	0.000381807	0.0206275	MDN1	SESTD1	NDOR1	DISC1	DDX60	ING4	http://amigo.geneontology.org/amigo/term/GO:0045111
cytosolic small ribosomal subunit	Gene Ontology	GO:0022627	7	36	0.000384169	0.0206275	RPS16	RPS15	RPS14	EIF2A	FAU	RPS15A	RPS2	http://amigo.geneontology.org/amigo/term/GO:0022627
protein destabilization	Gene Ontology	GO:0031648	7	37	0.000444434	0.0233861	CTSH	SIRT1	PLK1	CCDC88C	PRKDC	GGA3	CREBBP	http://amigo.geneontology.org/amigo/term/GO:0031648
histone acetyltransferase activity	Gene Ontology	GO:0004402	6	26	0.000457366	0.0235947	METTL8	KAT2B	TAF5L	TADA1	CREBBP	ATF2	http://amigo.geneontology.org/amigo/term/GO:0004402
zinc ion binding	Gene Ontology	GO:0008270	33	527	0.000575318	0.0291089	IFIH1	PDXK	ZMAT2	SMPD1	IDE	HNF4beta	ZC3HC1	NR2F2	PHC1	MYCBP2	PRIMPOL	LIG3	NPEPPS	NR1H3	DNPEP	PHC3	TRAF7	PARP1	TCEA3	SORD	LACTB2	PPARD	MMP28	TRIP12	ACMSD	POLR2K	FSD1	VAT1	ZSWIM8	DBF4	CREBBP	CRIP1	KDM5B	http://amigo.geneontology.org/amigo/term/GO:0008270
positive regulation of transcription by RNA polymerase II	Gene Ontology	GO:0045944	44	779	0.000614874	0.0305233	TGFB1	HSF2	WWP2	ZBED1	TBX21	INO80	COPS5	CTNNB1	BCL9L	SMARCA5	MAFF	ZBTB17	CHD7	LPIN1	ASXL2	MED12	RB1	PARP1	CCPG1	CREBRF	CEBPZ	RNASEL	NR1H3	IL18	SIRT1	DAB2IP	MGA	SENP1	KAT2B	DLL1	PPARD	MED19	TCF7	PRKDC	NPM1	E2F7	TAF6	ZNF639	HNF4beta	OGT	SFPQ	WNT5A	CREBBP
protein ubiquitination	Gene Ontology	GO:0016567	19	244	0.000827053	0.0397801	FSD1	HERPUD1	DDB1	WWP2	TRAF7	PLK1	FBXL5	RSPRY1	TNFAIP1	SIRT1	DCAF13	KLHL2	MYCBP2	RNF128	RNF215	DCAF17	TRIM45	CUL1	RNF213	http://amigo.geneontology.org/amigo/term/GO:0016567
ATP-dependent chromatin remodeling	Gene Ontology	GO:0043044	5	19	0.000831587	0.0397801	SMARCAD1	SMARCC2	ARID1B	INO80	SMARCA5	http://amigo.geneontology.org/amigo/term/GO:0043044
negative regulation of proteasomal ubiquitin-dependent protein catabolic process	Gene Ontology	GO:0032435	5	20	0.00101247	0.0467333	OGT	CAMLG	N4BP1	RPL11	SENP1	http://amigo.geneontology.org/amigo/term/GO:0032435
regulation of microtubule polymerization or depolymerization	Gene Ontology	GO:0031110	4	11	0.00105345	0.0477868	MAPRE3	STMN1	CLASP2	CLASP1	http://amigo.geneontology.org/amigo/term/GO:0031110
centrosome	Gene Ontology	GO:0005813	23	333	0.0011532	0.051425	CLUAP1	DYNC1I2	VPS4B	PLK1	RAD18	KAT2B	DCAF13	XRCC2	MZT1	CCDC88C	VPS37A	DISC1	OFD1	HMMR	ZBED1	BRCA2	IFT57	DYNC1LI2	NPM1	RAB11FIP3	CTNNB1	CDC45	TUBGCP5	http://amigo.geneontology.org/amigo/term/GO:0005813
negative regulation of I-kappaB kinase/NF-kappaB signaling	Gene Ontology	GO:0043124	6	32	0.0011849	0.0519578	SIRT1	OPTN	PPM1B	DAB2IP	OTUD7B	NLRC3	http://amigo.geneontology.org/amigo/term/GO:0043124
protein stabilization	Gene Ontology	GO:0050821	11	105	0.00120877	0.0521355	HSF2	PEX6	CCT2	PHB	PHB2	NAA15	STK4	RPL11	PDCD10	NLK	CAMLG	http://amigo.geneontology.org/amigo/term/GO:0050821
negative regulation of apoptotic process	Gene Ontology	GO:0043066	16	196	0.001316	0.055845	CTSH	NAA15	PHB2	FAS	ALB	HSP90B1	COPS5	PRKDC	PLK1	CAT	PDCD10	EXFABP	WNT5A	DDB1	SETX	KRT18	http://amigo.geneontology.org/amigo/term/GO:0043066
brush border	Gene Ontology	GO:0005903	6	33	0.00136311	0.0562955	CAPZA2	ACTN4	MYH9	SLC34A2	FLII	SCIN	http://amigo.geneontology.org/amigo/term/GO:0005903
magnesium ion transmembrane transport	Gene Ontology	GO:1903830	4	12	0.00136941	0.0562955	NIPAL1	NIPA1	NIPAL3	CNNM4	http://amigo.geneontology.org/amigo/term/GO:1903830
intracellular membrane-bounded organelle	Gene Ontology	GO:0043231	18	237	0.00145374	0.05687	CYP2AC1	CNNM4	SPG21	TRAF7	ARL14EP	SPTAN1	AMBRA1	VPS37C	VPS37A	RC3H2	CYP2W1	DNAJC13	DENND1B	RPIA	PUSL1	TGFBRAP1	CYP2U1	NLRC3	http://amigo.geneontology.org/amigo/term/GO:0043231
double-stranded RNA binding	Gene Ontology	GO:0003725	7	47	0.00156055	0.05687	IFIH1	ADARB1	RC3H2	DUS2	DDX60	ILF3	ILF2	http://amigo.geneontology.org/amigo/term/GO:0003725
positive regulation of protein binding	Gene Ontology	GO:0032092	7	47	0.00156055	0.05687	IDE	EPHB6	RIPK2	STK4	RPL11	WNT5A	LFNG	http://amigo.geneontology.org/amigo/term/GO:0032092
negative regulation of epithelial cell proliferation	Gene Ontology	GO:0050680	6	34	0.00156105	0.05687	IFT57	DAB2IP	RB1	STRAP	PPARD	WNT5A	http://amigo.geneontology.org/amigo/term/GO:0050680
interleukin-18-mediated signaling pathway	Gene Ontology	GO:0035655	3	5	0.00159954	0.05687	IL18	IL18R1	IL18RAP	http://amigo.geneontology.org/amigo/term/GO:0035655
basal cortex	Gene Ontology	GO:0045180	3	5	0.00159954	0.05687	PHLDB1	CLASP2	CLASP1	http://amigo.geneontology.org/amigo/term/GO:0045180
positive regulation of xenophagy	Gene Ontology	GO:1904417	3	5	0.00159954	0.05687	OPTN	RIPK2	LRSAM1	http://amigo.geneontology.org/amigo/term/GO:1904417
mitochondrial DNA repair	Gene Ontology	GO:0043504	3	5	0.00159954	0.05687	PARP1	PRIMPOL	LIG3	http://amigo.geneontology.org/amigo/term/GO:0043504
regulation of branching involved in mammary gland duct morphogenesis	Gene Ontology	GO:0060762	3	5	0.00159954	0.05687	PHB2	TGFB1	WNT5A	http://amigo.geneontology.org/amigo/term/GO:0060762
positive regulation of nuclear cell cycle DNA replication	Gene Ontology	GO:0010571	3	5	0.00159954	0.05687	ATRX	DBF4	INO80	http://amigo.geneontology.org/amigo/term/GO:0010571
ribonucleoprotein complex binding	Gene Ontology	GO:0043021	5	23	0.00173082	0.0574197	EEFSEC	IFIH1	SRP54	EZH2	RNASEL	http://amigo.geneontology.org/amigo/term/GO:0043021
interstrand cross-link repair	Gene Ontology	GO:0036297	5	23	0.00173082	0.0574197	XRCC3	FANCB	FANCA	FANCD2	NUCKS1	http://amigo.geneontology.org/amigo/term/GO:0036297
MAPK cascade	Gene Ontology	GO:0000165	7	48	0.00173982	0.0574197	ICK	IL18	MAP4K3	MAP4K5	MAP4K4	NLK	SETX	http://amigo.geneontology.org/amigo/term/GO:0000165
response to gamma radiation	Gene Ontology	GO:0010332	4	13	0.00174594	0.0574197	BRCA2	XRCC2	FANCD2	PRKDC	http://amigo.geneontology.org/amigo/term/GO:0010332
retrograde protein transport, ER to cytosol	Gene Ontology	GO:0030970	4	13	0.00174594	0.0574197	HERPUD1	SEC61B	SEL1L	HSP90B1	http://amigo.geneontology.org/amigo/term/GO:0030970
positive regulation of peptidyl-threonine phosphorylation	Gene Ontology	GO:0010800	4	13	0.00174594	0.0574197	PLK1	WNT5A	PRKAG2	RIPK2	http://amigo.geneontology.org/amigo/term/GO:0010800
transcription, DNA-templated	Gene Ontology	GO:0006351	8	64	0.00202882	0.0653653	FUBP3	ASXL2	INO80	CBFA2T3	TCEA3	TCEANC	POLR2K	ILF2	http://amigo.geneontology.org/amigo/term/GO:0006351
cortical actin cytoskeleton organization	Gene Ontology	GO:0030866	5	24	0.00203723	0.0653653	EPB41L1	STRIP1	PLEK	FMNL2	AKAP11	http://amigo.geneontology.org/amigo/term/GO:0030866
membrane	Gene Ontology	GO:0016020	27	438	0.00215761	0.0676482	RECK	NIPA1	STAMBP	SERINC1	CTNNB1	SBF2	MDH2	ACSBG2	LRSAM1	SRPRA	CCPG1	TM9SF3	MTMR4	LAMA1	PLPP7	NIPAL1	ARL6IP5	VEGFA	SLC39A3	TGFBRAP1	CAPZA2	NIPAL3	RC3H2	FLOT1	RNF215	ABCC6	ABCC1	http://amigo.geneontology.org/amigo/term/GO:0016020
actin polymerization or depolymerization	Gene Ontology	GO:0008154	4	14	0.00218866	0.0676482	SVIL	ABI1	FLII	SCIN	http://amigo.geneontology.org/amigo/term/GO:0008154
hepatocyte apoptotic process	Gene Ontology	GO:0097284	3	6	0.00234265	0.0676482	STK4	RB1	KRT18	http://amigo.geneontology.org/amigo/term/GO:0097284
interleukin-1 receptor activity	Gene Ontology	GO:0004908	3	6	0.00234265	0.0676482	IL18R1	IL18RAP	IL1RL1	http://amigo.geneontology.org/amigo/term/GO:0004908
SRP-dependent cotranslational protein targeting to membrane, translocation	Gene Ontology	GO:0006616	3	6	0.00234265	0.0676482	SRP54	SEC61B	SEC61A2	http://amigo.geneontology.org/amigo/term/GO:0006616
phosphatidylinositol-4,5-bisphosphate binding	Gene Ontology	GO:0005546	7	51	0.0023747	0.0676482	SESTD1	SVIL	SYTL2	AMER1	COMMD1	FLII	SCIN	http://amigo.geneontology.org/amigo/term/GO:0005546
negative regulation of transcription, DNA-templated	Gene Ontology	GO:0045892	16	209	0.00241641	0.0676482	ZNF639	HHEX	RB1	PHB2	ZHX3	SIRT1	CBFA2T3	ING4	PHC1	RSF1	PHC3	MTERF3	TCF7	WNT5A	CBX3	ILF3	http://amigo.geneontology.org/amigo/term/GO:0045892
double-strand break repair via homologous recombination	Gene Ontology	GO:0000724	8	66	0.00241693	0.0676482	BRCA2	INO80	PRKDC	SFPQ	NUCKS1	XRCC2	NABP2	MCM8	http://amigo.geneontology.org/amigo/term/GO:0000724
centriolar satellite	Gene Ontology	GO:0034451	8	66	0.00241693	0.0676482	RAB11FIP3	PLK1	UPF3B	FLII	CENPU	KRT18	RBM39	NLRC3	http://amigo.geneontology.org/amigo/term/GO:0034451
ubiquitin protein ligase binding	Gene Ontology	GO:0031625	15	190	0.00247929	0.0686633	STX8	UBXN7	BAG4	CCT2	HSPA9	RAD18	UBE2D1	APBB1	RB1	CUL1	SMC6	RPL11	NLK	CAMLG	AMBRA1	http://amigo.geneontology.org/amigo/term/GO:0031625
transforming growth factor beta receptor signaling pathway	Gene Ontology	GO:0007179	7	52	0.00262173	0.0713451	TGFB1	SIRT1	ADAM9	APPL1	NLK	MTMR4	FUT8	http://amigo.geneontology.org/amigo/term/GO:0007179
DNA replication initiation	Gene Ontology	GO:0006270	4	15	0.00270308	0.0713451	CDC45	MCM10	TOPBP1	MCM8	http://amigo.geneontology.org/amigo/term/GO:0006270
nuclear euchromatin	Gene Ontology	GO:0005719	4	15	0.00270308	0.0713451	CTNNB1	SIRT1	CBX3	TCF7	http://amigo.geneontology.org/amigo/term/GO:0005719
endopeptidase inhibitor activity	Gene Ontology	GO:0004866	4	15	0.00270308	0.0713451	C3	RECK	C5	C4	http://amigo.geneontology.org/amigo/term/GO:0004866
protein-DNA complex	Gene Ontology	GO:0032993	5	26	0.00276594	0.0713451	CTNNB1	PRKDC	ZBTB17	POLR2H	PARP1	http://amigo.geneontology.org/amigo/term/GO:0032993
DNA-dependent ATPase activity	Gene Ontology	GO:0008094	5	26	0.00276594	0.0713451	SMARCAD1	XRCC3	XRCC2	INO80	SMARCA5	http://amigo.geneontology.org/amigo/term/GO:0008094
erythrocyte differentiation	Gene Ontology	GO:0030218	5	26	0.00276594	0.0713451	EPAS1	LYN	HSPA9	KMT2E	RPS14	http://amigo.geneontology.org/amigo/term/GO:0030218
transcription factor binding	Gene Ontology	GO:0008134	13	155	0.00289934	0.0733478	E2F7	EPAS1	UBXN7	ASCL3	PARP1	KAT2B	PER2	STK4	NUCKS1	APBB1	MED19	NLK	PRKDC	http://amigo.geneontology.org/amigo/term/GO:0008134
nuclear envelope	Gene Ontology	GO:0005635	9	85	0.00307547	0.0767082	PLPP7	VRK2	SUN2	PARP1	LMO7	GOLT1A	GPX4	ANXA11	TNKS2	http://amigo.geneontology.org/amigo/term/GO:0005635
extracellular space	Gene Ontology	GO:0005615	39	731	0.0031682	0.0767082	TGFB1	CKB	CRELD2	SLC2A14	SMPD1	HABP2	ADAM9	SERPINE2	PODN	IDE	CLEC3B	SULF1	FAU	BF2	SFTPA1	C3	CST3	FGG	C5	GUSB	CTSH	LAMA1	GLIPR2	PDIA3	PLA2G2E	MMP28	COL4A1	SERPINI1	EXFABP	CTSS	IL18	VEGFA	F5	ALB	C1QTNF5	GC	WNT5A	C4	COL12A1	http://amigo.geneontology.org/amigo/term/GO:0005615
site of double-strand break	Gene Ontology	GO:0035861	6	40	0.00324235	0.0767082	RAD18	PARP1	SMC6	SMARCAD1	UBXN7	ATF2	http://amigo.geneontology.org/amigo/term/GO:0035861
replication fork protection complex	Gene Ontology	GO:0031298	3	7	0.00326776	0.0767082	CDC45	MCM10	TIPIN	http://amigo.geneontology.org/amigo/term/GO:0031298
flotillin complex	Gene Ontology	GO:0016600	3	7	0.00326776	0.0767082	CTNNB1	CORO1C	FLOT1	http://amigo.geneontology.org/amigo/term/GO:0016600
arylsulfatase activity	Gene Ontology	GO:0004065	3	7	0.00326776	0.0767082	ARSH	SULF1	STS	http://amigo.geneontology.org/amigo/term/GO:0004065
innervation	Gene Ontology	GO:0060384	4	16	0.00329457	0.0767082	SERPINE2	SULF1	CHD7	ADARB1	http://amigo.geneontology.org/amigo/term/GO:0060384
ferrous iron binding	Gene Ontology	GO:0008198	4	16	0.00329457	0.0767082	ACP5	ALKBH2	FTO	PHYH	http://amigo.geneontology.org/amigo/term/GO:0008198
actin cytoskeleton	Gene Ontology	GO:0015629	12	140	0.00351447	0.0811102	SVIL	INTS6	TOPBP1	MPRIP	MYH9	CORO1C	KLHL2	BAIAP2	FLII	PPP1R9B	STK38L	SCIN	http://amigo.geneontology.org/amigo/term/GO:0015629
heart looping	Gene Ontology	GO:0001947	6	41	0.00361856	0.0827864	ARL13B	IFT57	TBX21	DLL1	VANGL2	WNT5A	http://amigo.geneontology.org/amigo/term/GO:0001947
metal ion binding	Gene Ontology	GO:0046872	38	714	0.00369242	0.0837479	UBXN7	ANTXR2	METAP2	CAT	RC3H2	NGLY1	GART	YPEL5	OPTN	ZBTB17	KMT2E	ASXL2	CBFA2T3	BF2	TNS2	LFNG	PDCD2	TDO2	LIAS	FGD3	RSPRY1	RSF1	THOP1	NUDT13	CYBA	STK4	ING4	ATRX	NT5DC4	MTMR4	THAP5	ALB	LMO7	NUBP2	ACLY	CRIP2	RNF213	ATF2	http://amigo.geneontology.org/amigo/term/GO:0046872
cellular response to DNA damage stimulus	Gene Ontology	GO:0006974	11	123	0.00378682	0.0849982	CHD2	APBB1	PRKDC	SMC6	MCM10	KIN	TRIP12	MCM8	CBX3	LYN	ATF2	http://amigo.geneontology.org/amigo/term/GO:0006974
dephosphorylation	Gene Ontology	GO:0016311	7	56	0.00381216	0.0849982	ACP5	PLPP7	LPIN1	PFKFB2	NT5C3B	PRUNE1	NT5DC4	http://amigo.geneontology.org/amigo/term/GO:0016311
nucleosome binding	Gene Ontology	GO:0031491	4	17	0.00396838	0.0877378	ARID1B	UBXN7	NAP1L4	SMARCA5	http://amigo.geneontology.org/amigo/term/GO:0031491
positive regulation of interleukin-6 production	Gene Ontology	GO:0032755	5	29	0.00418786	0.0918187	WNT5A	PTPN11	CYBA	RIPK2	IFIH1	http://amigo.geneontology.org/amigo/term/GO:0032755
DNA repair	Gene Ontology	GO:0006281	10	107	0.00424241	0.0922461	INTS3	PARPBP	RFC4	RFC1	PARP1	INO80	LIG3	DDB1	NPM1	MMS19	http://amigo.geneontology.org/amigo/term/GO:0006281
telomere maintenance via recombination	Gene Ontology	GO:0000722	3	8	0.00438743	0.0938482	XRCC3	BRCA2	SMC6	http://amigo.geneontology.org/amigo/term/GO:0000722
UV-damage excision repair	Gene Ontology	GO:0070914	3	8	0.00438743	0.0938482	SIRT1	DDB1	INO80	http://amigo.geneontology.org/amigo/term/GO:0070914
PML body	Gene Ontology	GO:0016605	7	58	0.00454252	0.0963821	SIRT1	TOPBP1	RB1	SMC6	SATB1	ATRX	N4BP1	http://amigo.geneontology.org/amigo/term/GO:0016605
endodermal cell differentiation	Gene Ontology	GO:0035987	4	18	0.00472954	0.097247	SETD2	ITGB2	COL12A1	ITGA7	http://amigo.geneontology.org/amigo/term/GO:0035987
barbed-end actin filament capping	Gene Ontology	GO:0051016	4	18	0.00472954	0.097247	CAPZA2	SVIL	FLII	SCIN	http://amigo.geneontology.org/amigo/term/GO:0051016
DNA replication origin binding	Gene Ontology	GO:0003688	4	18	0.00472954	0.097247	CDC45	MCM10	MCM2	MCM8	http://amigo.geneontology.org/amigo/term/GO:0003688
spindle	Gene Ontology	GO:0005819	6	44	0.00494205	0.10002	CBX3	MYH9	RB1	ANXA11	CLTCL1	MZT1	http://amigo.geneontology.org/amigo/term/GO:0005819
protein serine/threonine kinase activity	Gene Ontology	GO:0004674	15	207	0.00521645	0.104767	ALPK1	RPS6KA5	VRK1	MAP4K4	VRK2	STK38L	PRPF4B	ADCK1	PLK1	RIPK2	STK4	STK35	PRKDC	TNNI3K	MAPK11	http://amigo.geneontology.org/amigo/term/GO:0004674
mRNA binding	Gene Ontology	GO:0003729	12	148	0.00529605	0.10556	SYNCRIP	CLUH	NUP98	FUBP3	FUBP1	SLC4A1AP	UPF3B	RC3H2	RPS2	PTBP1	IGF2BP3	THOC5	http://amigo.geneontology.org/amigo/term/GO:0003729
single-stranded RNA binding	Gene Ontology	GO:0003727	5	31	0.00538535	0.106533	LACTB2	IFIH1	NPTXR	ILF3	DDX60	http://amigo.geneontology.org/amigo/term/GO:0003727
Schaffer collateral - CA1 synapse	Gene Ontology	GO:0098685	6	45	0.00545331	0.107072	EFNB2	CTNNB1	ADRB1	BAIAP2	ITPR1	FBXL20	http://amigo.geneontology.org/amigo/term/GO:0098685
adipose tissue development	Gene Ontology	GO:0060612	4	19	0.00558294	0.108126	AMER1	PPARD	FTO	ATF2	http://amigo.geneontology.org/amigo/term/GO:0060612
RNA stem-loop binding	Gene Ontology	GO:0035613	3	9	0.00571247	0.108126	DAZAP1	RC3H2	METTL16	http://amigo.geneontology.org/amigo/term/GO:0035613
intra-S DNA damage checkpoint	Gene Ontology	GO:0031573	3	9	0.00571247	0.108126	TIPIN	FANCD2	ATF2	http://amigo.geneontology.org/amigo/term/GO:0031573
endoplasmic reticulum calcium ion homeostasis	Gene Ontology	GO:0032469	3	9	0.00571247	0.108126	HERPUD1	ITPR1	KCTD17	http://amigo.geneontology.org/amigo/term/GO:0032469
positive regulation of double-strand break repair via homologous recombination	Gene Ontology	GO:1905168	3	9	0.00571247	0.108126	PARP1	MMS19	FANCB	http://amigo.geneontology.org/amigo/term/GO:1905168
RNA polymerase II activating transcription factor binding	Gene Ontology	GO:0001102	6	46	0.00600218	0.111998	MGA	RBL1	TBX21	RB1	CTNNB1	ATF2	http://amigo.geneontology.org/amigo/term/GO:0001102
negative regulation of G1/S transition of mitotic cell cycle	Gene Ontology	GO:2000134	4	20	0.00653321	0.121048	E2F7	EZH2	RBL1	RB1	http://amigo.geneontology.org/amigo/term/GO:2000134
negative regulation of protein ubiquitination	Gene Ontology	GO:0031397	5	33	0.0068063	0.123499	HSF2	OGT	CAMLG	N4BP1	PRR7	http://amigo.geneontology.org/amigo/term/GO:0031397
microtubule organizing center	Gene Ontology	GO:0005815	5	33	0.0068063	0.123499	MAPRE3	NUF2	CLASP1	SMTNL2	CLASP2	http://amigo.geneontology.org/amigo/term/GO:0005815
endoplasmic reticulum membrane	Gene Ontology	GO:0005789	17	257	0.00712027	0.125527	PCYT1A	FMO3	HERPUD1	VRK2	ARL6IP5	SRPRA	SSR2	HSP90B1	RHBDF1	RHBDF2	DNAJB14	ITPR2	SLC27A4	ITPR1	FDFT1	STARD3NL	SEC61A2	http://amigo.geneontology.org/amigo/term/GO:0005789
blood vessel morphogenesis	Gene Ontology	GO:0048514	3	10	0.00725204	0.125527	EFNB2	LAMA1	NR2F2	http://amigo.geneontology.org/amigo/term/GO:0048514
protein localization to chromatin	Gene Ontology	GO:0071168	3	10	0.00725204	0.125527	PLK1	EZH2	WAPL	http://amigo.geneontology.org/amigo/term/GO:0071168
actin filament severing	Gene Ontology	GO:0051014	3	10	0.00725204	0.125527	SVIL	FLII	SCIN	http://amigo.geneontology.org/amigo/term/GO:0051014
platelet alpha granule	Gene Ontology	GO:0031091	3	10	0.00725204	0.125527	FGG	F5	SERPINE2	http://amigo.geneontology.org/amigo/term/GO:0031091
positive regulation of endocytosis	Gene Ontology	GO:0045807	3	10	0.00725204	0.125527	DLL1	WNT5A	FLOT1	http://amigo.geneontology.org/amigo/term/GO:0045807
positive regulation of G protein-coupled receptor signaling pathway	Gene Ontology	GO:0045745	3	10	0.00725204	0.125527	C3	PHB	WNT5A	http://amigo.geneontology.org/amigo/term/GO:0045745
replication fork	Gene Ontology	GO:0005657	4	21	0.00758478	0.128291	RAD18	XRCC3	XRCC2	PRIMPOL	http://amigo.geneontology.org/amigo/term/GO:0005657
proteolysis involved in cellular protein catabolic process	Gene Ontology	GO:0051603	4	21	0.00758478	0.128291	CTSH	RSPRY1	CTSS	IDE	http://amigo.geneontology.org/amigo/term/GO:0051603
maturation of SSU-rRNA from tricistronic rRNA transcript (SSU-rRNA, 5.8S rRNA, LSU-rRNA)	Gene Ontology	GO:0000462	4	21	0.00758478	0.128291	DCAF13	DHX37	RPS16	RPS14	http://amigo.geneontology.org/amigo/term/GO:0000462
somitogenesis	Gene Ontology	GO:0001756	5	34	0.00760677	0.128291	LFNG	WNT5A	ABI1	XRCC2	PRKDC	http://amigo.geneontology.org/amigo/term/GO:0001756
focal adhesion	Gene Ontology	GO:0005925	10	118	0.00792049	0.132332	ITGB2	IL1RL1	CLASP1	ARL14EP	ARPC2	MYH9	SENP1	PTPRC	TNS2	TADA1	http://amigo.geneontology.org/amigo/term/GO:0005925
multicellular organism growth	Gene Ontology	GO:0035264	7	65	0.00794697	0.132332	TNKS2	PTPN11	ADARB1	RC3H2	ATRX	HHEX	XRCC2	http://amigo.geneontology.org/amigo/term/GO:0035264
negative regulation of NF-kappaB transcription factor activity	Gene Ontology	GO:0032088	5	35	0.00847044	0.139286	COMMD1	SIRT1	CAT	DAB2IP	NLRC3	http://amigo.geneontology.org/amigo/term/GO:0032088
peroxisomal membrane	Gene Ontology	GO:0005778	4	22	0.00874183	0.140242	PEX6	ABCD2	PDCD2	CAT	http://amigo.geneontology.org/amigo/term/GO:0005778
positive regulation of epithelial cell migration	Gene Ontology	GO:0010634	4	22	0.00874183	0.140242	CTSH	CAPN7	GLIPR2	CLASP1	http://amigo.geneontology.org/amigo/term/GO:0010634
response to UV	Gene Ontology	GO:0009411	4	22	0.00874183	0.140242	MAP4K3	RAD18	PRIMPOL	TIPIN	http://amigo.geneontology.org/amigo/term/GO:0009411
transcription factor TFTC complex	Gene Ontology	GO:0033276	3	11	0.00901375	0.140327	TAF5L	TAF6	TAF4	http://amigo.geneontology.org/amigo/term/GO:0033276
establishment of epithelial cell apical/basal polarity	Gene Ontology	GO:0045198	3	11	0.00901375	0.140327	LAMA1	SLC9A3R1	WNT5A	http://amigo.geneontology.org/amigo/term/GO:0045198
ubiquitin-dependent protein catabolic process via the multivesicular body sorting pathway	Gene Ontology	GO:0043162	3	11	0.00901375	0.140327	VPS37C	VPS37A	VPS4B	http://amigo.geneontology.org/amigo/term/GO:0043162
positive regulation of gluconeogenesis	Gene Ontology	GO:0045722	3	11	0.00901375	0.140327	SIRT1	DDB1	KAT2B	http://amigo.geneontology.org/amigo/term/GO:0045722
regulation of protein secretion	Gene Ontology	GO:0050708	3	11	0.00901375	0.140327	RHBDF1	RHBDF2	TGFB1	http://amigo.geneontology.org/amigo/term/GO:0050708
ATPase activity	Gene Ontology	GO:0016887	11	140	0.00914153	0.140651	MDN1	ABCD2	PEX6	HSPA9	MYH9	INO80	VPS4B	ABCC6	ABCB8	ABCC1	RNF213	http://amigo.geneontology.org/amigo/term/GO:0016887
canonical Wnt signaling pathway	Gene Ontology	GO:0060070	6	51	0.00936425	0.14324	RECK	TCF7	DISC1	MED12	BCL9L	WNT5A	http://amigo.geneontology.org/amigo/term/GO:0060070
cell population proliferation	Gene Ontology	GO:0008283	8	85	0.00967083	0.14623	DAZAP1	MCM10	IL18RAP	LARP1	RHBDF1	BRCA2	EXFABP	CUL1	http://amigo.geneontology.org/amigo/term/GO:0008283
phosphatidylinositol-3,4-bisphosphate binding	Gene Ontology	GO:0043325	4	23	0.0100083	0.148768	PLEK	SESTD1	COMMD1	ARAP3	http://amigo.geneontology.org/amigo/term/GO:0043325
positive regulation of interferon-gamma production	Gene Ontology	GO:0032729	4	23	0.0100083	0.148768	IL18	WNT5A	RIPK2	IL18R1	http://amigo.geneontology.org/amigo/term/GO:0032729
T cell differentiation	Gene Ontology	GO:0030217	4	23	0.0100083	0.148768	TBX21	LFNG	DLL4	CHD7	http://amigo.geneontology.org/amigo/term/GO:0030217
integrin-mediated signaling pathway	Gene Ontology	GO:0007229	6	52	0.0101707	0.150333	ITGB2	PTPN11	ITGA3	ITGA7	PLEK	FUT8	http://amigo.geneontology.org/amigo/term/GO:0007229
protein phosphorylation	Gene Ontology	GO:0006468	15	226	0.010746	0.155579	ALPK1	LAMA1	RPS6KA5	TNNI3K	GRK6	PRKAG2	SCYL3	EIF2A	ADCK1	CAMK2D	RIPK2	STK35	PRKDC	RNASEL	ILF3	http://amigo.geneontology.org/amigo/term/GO:0006468
mRNA splicing, via spliceosome	Gene Ontology	GO:0000398	8	87	0.0109263	0.156275	RBM6	PLRG1	EFTUD2	SFPQ	ZMAT2	HNRNPA2B1	HTATSF1	SART3	http://amigo.geneontology.org/amigo/term/GO:0000398
stress-activated protein kinase signaling cascade	Gene Ontology	GO:0031098	3	12	0.0110038	0.156275	CCDC88C	STK4	MAP4K4	http://amigo.geneontology.org/amigo/term/GO:0031098
endoplasmic reticulum	Gene Ontology	GO:0005783	28	524	0.0110745	0.156275	CRELD2	ALB	RPLP0	ZDHHC18	HSP90B1	ERGIC1	GOLT1A	ACSBG2	CAMLG	APBB1	SULF1	SLC26A11	PDIA3	ATP10D	CCDC3	LSG1	PLA2G2E	PCYT1A	SRP72	KCTD17	B3GALNT2	HYAL3	TRAPPC5	TMEM50B	SSR2	RNF128	VWF	SEC61A2	http://amigo.geneontology.org/amigo/term/GO:0005783
mRNA export from nucleus	Gene Ontology	GO:0006406	4	24	0.0113879	0.156275	NUP214	NUP133	THOC5	HNRNPA2B1	http://amigo.geneontology.org/amigo/term/GO:0006406
branching involved in blood vessel morphogenesis	Gene Ontology	GO:0001569	4	24	0.0113879	0.156275	CTNNB1	STK4	DLL4	COL4A1	http://amigo.geneontology.org/amigo/term/GO:0001569
spindle microtubule	Gene Ontology	GO:0005876	4	24	0.0113879	0.156275	PLK1	KIF11	CLASP1	CLASP2	http://amigo.geneontology.org/amigo/term/GO:0005876
negative regulation of ERK1 and ERK2 cascade	Gene Ontology	GO:0070373	5	38	0.0114637	0.156275	DAB2IP	PHB	LYN	PTPRC	SLC9A3R1	http://amigo.geneontology.org/amigo/term/GO:0070373
ubiquitin-protein transferase activity	Gene Ontology	GO:0004842	8	89	0.0122982	0.166786	SEL1L	TRIM45	TRAF7	RSPRY1	TNFAIP1	UBXN7	CUL1	RNF213	http://amigo.geneontology.org/amigo/term/GO:0004842
negative regulation of transforming growth factor beta receptor signaling pathway	Gene Ontology	GO:0030512	5	39	0.0126029	0.168119	STRAP	GLG1	SIRT1	HTRA3	BCL9L	http://amigo.geneontology.org/amigo/term/GO:0030512
transcription initiation from RNA polymerase II promoter	Gene Ontology	GO:0006367	4	25	0.012884	0.168119	TAF6	MED12	TAF4	TAF8	http://amigo.geneontology.org/amigo/term/GO:0006367
histone H3 acetylation	Gene Ontology	GO:0043966	4	25	0.012884	0.168119	ING4	BRCA2	TAF5L	TADA1	http://amigo.geneontology.org/amigo/term/GO:0043966
histone acetylation	Gene Ontology	GO:0016573	4	25	0.012884	0.168119	METTL8	TAF6	CREBBP	ATF2	http://amigo.geneontology.org/amigo/term/GO:0016573
sprouting angiogenesis	Gene Ontology	GO:0002040	4	25	0.012884	0.168119	E2F7	RECK	VEGFA	RNF213	http://amigo.geneontology.org/amigo/term/GO:0002040
phosphatase binding	Gene Ontology	GO:0019902	4	25	0.012884	0.168119	SLC9A3R1	SBF2	ELL	SYTL2	http://amigo.geneontology.org/amigo/term/GO:0019902
protein N-terminus binding	Gene Ontology	GO:0047485	6	55	0.0128846	0.168119	MAU2	HESX1	PARP1	PHB2	PDCD10	VWF	http://amigo.geneontology.org/amigo/term/GO:0047485
WW domain binding	Gene Ontology	GO:0050699	3	13	0.0132272	0.168119	WBP2NL	WBP1	SCNN1A	http://amigo.geneontology.org/amigo/term/GO:0050699
positive regulation of neural precursor cell proliferation	Gene Ontology	GO:2000179	3	13	0.0132272	0.168119	NAP1L1	KIAA1524	DLL4	http://amigo.geneontology.org/amigo/term/GO:2000179
histone H3 deacetylation	Gene Ontology	GO:0070932	3	13	0.0132272	0.168119	SMARCAD1	SIRT1	SFPQ	http://amigo.geneontology.org/amigo/term/GO:0070932
post-anal tail morphogenesis	Gene Ontology	GO:0036342	3	13	0.0132272	0.168119	WNT5A	VANGL2	MED12	http://amigo.geneontology.org/amigo/term/GO:0036342
heterotypic cell-cell adhesion	Gene Ontology	GO:0034113	3	13	0.0132272	0.168119	ITGB2	PTPRC	ITGA7	http://amigo.geneontology.org/amigo/term/GO:0034113
cellular lipid metabolic process	Gene Ontology	GO:0044255	3	13	0.0132272	0.168119	EXFABP	LPIN1	NR1H3	http://amigo.geneontology.org/amigo/term/GO:0044255
positive regulation of tumor necrosis factor production	Gene Ontology	GO:0032760	4	26	0.0144998	0.177262	PTPN11	CYBA	PTPRC	RIPK2	http://amigo.geneontology.org/amigo/term/GO:0032760
RNA processing	Gene Ontology	GO:0006396	4	26	0.0144998	0.177262	SUGP2	RNASEL	HNRNPUL1	ADARB1	http://amigo.geneontology.org/amigo/term/GO:0006396
positive regulation of glucose import	Gene Ontology	GO:0046326	4	26	0.0144998	0.177262	APPL1	PTPN11	RNASEL	CLTCL1	http://amigo.geneontology.org/amigo/term/GO:0046326
fatty acid beta-oxidation	Gene Ontology	GO:0006635	4	26	0.0144998	0.177262	PPARD	ABCD2	BDH2	DECR1	http://amigo.geneontology.org/amigo/term/GO:0006635
NAD binding	Gene Ontology	GO:0051287	4	26	0.0144998	0.177262	SORD	IDH3B	BDH2	PARP1	http://amigo.geneontology.org/amigo/term/GO:0051287
Rab GTPase binding	Gene Ontology	GO:0017137	8	92	0.0145874	0.177262	RAB11FIP3	OPTN	WDR44	SYTL2	TNFAIP1	GOLGA5	SGSM1	DENND1B	http://amigo.geneontology.org/amigo/term/GO:0017137
proline-rich region binding	Gene Ontology	GO:0070064	3	14	0.0156874	0.177262	BAIAP2	TCERG1	APBB1	http://amigo.geneontology.org/amigo/term/GO:0070064
nuclear heterochromatin	Gene Ontology	GO:0005720	3	14	0.0156874	0.177262	SIRT1	CBX3	SATB1	http://amigo.geneontology.org/amigo/term/GO:0005720
T cell proliferation	Gene Ontology	GO:0042098	3	14	0.0156874	0.177262	RIPK2	RC3H2	PTPRC	http://amigo.geneontology.org/amigo/term/GO:0042098
endoderm development	Gene Ontology	GO:0007492	3	14	0.0156874	0.177262	TGFB1	MED12	HHEX	http://amigo.geneontology.org/amigo/term/GO:0007492
mRNA methylation	Gene Ontology	GO:0080009	3	14	0.0156874	0.177262	TRMT6	METTL8	METTL16	http://amigo.geneontology.org/amigo/term/GO:0080009
negative regulation of myoblast differentiation	Gene Ontology	GO:0045662	3	14	0.0156874	0.177262	DLL1	PPARD	WNT5A	http://amigo.geneontology.org/amigo/term/GO:0045662
mitochondrial outer membrane	Gene Ontology	GO:0005741	6	58	0.016069	0.177262	LPIN1	PHB2	BID	HK2	VDAC3	ATF2	http://amigo.geneontology.org/amigo/term/GO:0005741
beta-catenin binding	Gene Ontology	GO:0008013	6	58	0.016069	0.177262	TCF7	AMER1	SLC9A3R1	CTNNB1	MED12	BCL9L	http://amigo.geneontology.org/amigo/term/GO:0008013
transcription factor TFIID complex	Gene Ontology	GO:0005669	4	27	0.0162381	0.177262	GTF2E1	TAF6	TAF4	TAF8	http://amigo.geneontology.org/amigo/term/GO:0005669
response to ionizing radiation	Gene Ontology	GO:0010212	4	27	0.0162381	0.177262	INTS3	UBXN7	NABP2	TOPBP1	http://amigo.geneontology.org/amigo/term/GO:0010212
ephrin receptor signaling pathway	Gene Ontology	GO:0048013	4	27	0.0162381	0.177262	SIPA1L1	EFNB2	PTPN11	EPHB6	http://amigo.geneontology.org/amigo/term/GO:0048013
negative regulation of protein catabolic process	Gene Ontology	GO:0042177	4	27	0.0162381	0.177262	PHB	DEDD	SERPINE2	MYCBP2	http://amigo.geneontology.org/amigo/term/GO:0042177
oxidoreductase activity, acting on paired donors, with incorporation or reduction of molecular oxygen, reduced flavin or flavoprotein as one donor, and incorporation of one atom of oxygen	Gene Ontology	GO:0016712	4	27	0.0162381	0.177262	CYP2AC1	COQ6	CYP2W1	CYP2U1	http://amigo.geneontology.org/amigo/term/GO:0016712
signaling receptor binding	Gene Ontology	GO:0005102	10	133	0.0163943	0.177262	LAMA1	SLC9A3R1	STRAP	RGMA	RIPK2	PTPRC	LYN	FGG	SERPINE2	GUSB	http://amigo.geneontology.org/amigo/term/GO:0005102
regulation of gene expression	Gene Ontology	GO:0010468	9	114	0.0169948	0.177262	ICK	PRDM11	FUBP3	FUBP1	AFF1	IGF2BP3	CRIP1	NLK	FUT8	http://amigo.geneontology.org/amigo/term/GO:0010468
RNA polymerase II transcription regulatory region sequence-specific DNA binding	Gene Ontology	GO:0000977	13	197	0.0174972	0.177262	MGA	HHEX	RBL1	HNF4beta	ACTN4	TBX21	ASCL3	PARP1	RB1	KAT2B	SATB1	CREBRF	NR2F2	http://amigo.geneontology.org/amigo/term/GO:0000977
cytosolic large ribosomal subunit	Gene Ontology	GO:0022625	5	43	0.0179206	0.177262	RPL11	RPLP0	RPL3	RPL12	RSL24D1	http://amigo.geneontology.org/amigo/term/GO:0022625
positive regulation of epithelial to mesenchymal transition	Gene Ontology	GO:0010718	4	28	0.0181017	0.177262	BCL9L	EZH2	GLIPR2	TGFB1	http://amigo.geneontology.org/amigo/term/GO:0010718
negative regulation of MAP kinase activity	Gene Ontology	GO:0043407	4	28	0.0181017	0.177262	DAB2IP	PAQR3	SMPD1	LYN	http://amigo.geneontology.org/amigo/term/GO:0043407
negative regulation of phosphatase activity	Gene Ontology	GO:0010923	4	28	0.0181017	0.177262	MPHOSPH10	RIMBP2	ELL	SYTL2	http://amigo.geneontology.org/amigo/term/GO:0010923
regulation of translation	Gene Ontology	GO:0006417	4	28	0.0181017	0.177262	PTBP1	IGF2BP3	EIF2A	RPS14	http://amigo.geneontology.org/amigo/term/GO:0006417
tRNA methylation	Gene Ontology	GO:0030488	4	28	0.0181017	0.177262	TRMT6	METTL8	TRMT12	TARBP1	http://amigo.geneontology.org/amigo/term/GO:0030488
mitotic spindle assembly	Gene Ontology	GO:0090307	4	28	0.0181017	0.177262	MZT1	KIF11	CLASP1	CLASP2	http://amigo.geneontology.org/amigo/term/GO:0090307
sulfate transmembrane transporter activity	Gene Ontology	GO:0015116	3	15	0.0183872	0.177262	SLC26A11	SLC25A30	SLC25A10	http://amigo.geneontology.org/amigo/term/GO:0015116
DNA polymerase binding	Gene Ontology	GO:0070182	3	15	0.0183872	0.177262	NABP2	FANCD2	NAT10	http://amigo.geneontology.org/amigo/term/GO:0070182
protein targeting to vacuole	Gene Ontology	GO:0006623	3	15	0.0183872	0.177262	RNF215	VPS37C	VPS37A	http://amigo.geneontology.org/amigo/term/GO:0006623
positive regulation of mRNA splicing, via spliceosome	Gene Ontology	GO:0048026	3	15	0.0183872	0.177262	DAZAP1	NCL	NUP98	http://amigo.geneontology.org/amigo/term/GO:0048026
negative regulation of endopeptidase activity	Gene Ontology	GO:0010951	7	78	0.0187444	0.177262	RECK	C5	SERPINI1	C3	CST3	SERPINE2	C4	http://amigo.geneontology.org/amigo/term/GO:0010951
protein-containing complex binding	Gene Ontology	GO:0044877	8	97	0.0190674	0.177262	PEX6	NUF2	RAD18	DAB2IP	APPL1	VPS4B	LYN	DDB1	http://amigo.geneontology.org/amigo/term/GO:0044877
positive regulation of cell-cell adhesion mediated by cadherin	Gene Ontology	GO:2000049	2	5	0.0191343	0.177262	WNT5A	FLOT1	http://amigo.geneontology.org/amigo/term/GO:2000049
succinate transmembrane transporter activity	Gene Ontology	GO:0015141	2	5	0.0191343	0.177262	SLC25A30	SLC25A10	http://amigo.geneontology.org/amigo/term/GO:0015141
ADP-ribosylation factor binding	Gene Ontology	GO:0030306	2	5	0.0191343	0.177262	RAB11FIP3	GGA3	http://amigo.geneontology.org/amigo/term/GO:0030306
rDNA heterochromatin assembly	Gene Ontology	GO:0000183	2	5	0.0191343	0.177262	SIRT1	SMARCA5	http://amigo.geneontology.org/amigo/term/GO:0000183
atrioventricular canal development	Gene Ontology	GO:0036302	2	5	0.0191343	0.177262	PTPN11	CHD7	http://amigo.geneontology.org/amigo/term/GO:0036302
regulation of erythrocyte differentiation	Gene Ontology	GO:0045646	2	5	0.0191343	0.177262	LYN	HSPA9	http://amigo.geneontology.org/amigo/term/GO:0045646
chordate embryonic development	Gene Ontology	GO:0043009	2	5	0.0191343	0.177262	CENPU	BRCA2	http://amigo.geneontology.org/amigo/term/GO:0043009
Golgi cis cisterna	Gene Ontology	GO:0000137	2	5	0.0191343	0.177262	GOLT1A	TMEM59	http://amigo.geneontology.org/amigo/term/GO:0000137
negative regulation of mitochondrial fusion	Gene Ontology	GO:0010637	2	5	0.0191343	0.177262	VAT1	ADCK1	http://amigo.geneontology.org/amigo/term/GO:0010637
beta-catenin-TCF complex	Gene Ontology	GO:1990907	2	5	0.0191343	0.177262	TLE3	BCL9L	http://amigo.geneontology.org/amigo/term/GO:1990907
CRD-mediated mRNA stability complex	Gene Ontology	GO:0070937	2	5	0.0191343	0.177262	SYNCRIP	CSDE1	http://amigo.geneontology.org/amigo/term/GO:0070937
primitive streak formation	Gene Ontology	GO:0090009	2	5	0.0191343	0.177262	WNT5A	HHEX	http://amigo.geneontology.org/amigo/term/GO:0090009
transcription initiation from RNA polymerase III promoter	Gene Ontology	GO:0006384	2	5	0.0191343	0.177262	CRCP	GTF3C1	http://amigo.geneontology.org/amigo/term/GO:0006384
nose development	Gene Ontology	GO:0043584	2	5	0.0191343	0.177262	HESX1	CHD7	http://amigo.geneontology.org/amigo/term/GO:0043584
positive regulation of ossification	Gene Ontology	GO:0045778	2	5	0.0191343	0.177262	PTPN11	WNT5A	http://amigo.geneontology.org/amigo/term/GO:0045778
DNA dealkylation involved in DNA repair	Gene Ontology	GO:0006307	2	5	0.0191343	0.177262	ALKBH2	FTO	http://amigo.geneontology.org/amigo/term/GO:0006307
-	Gene Ontology	GO:0090197	2	5	0.0191343	0.177262	IL1RL1	C5	http://amigo.geneontology.org/amigo/term/GO:0090197
positive regulation of mucus secretion	Gene Ontology	GO:0070257	2	5	0.0191343	0.177262	CYBA	SYTL2	http://amigo.geneontology.org/amigo/term/GO:0070257
stem cell development	Gene Ontology	GO:0048864	2	5	0.0191343	0.177262	SETD2	PTPRC	http://amigo.geneontology.org/amigo/term/GO:0048864
secondary palate development	Gene Ontology	GO:0062009	2	5	0.0191343	0.177262	WNT5A	CHD7	http://amigo.geneontology.org/amigo/term/GO:0062009
sodium ion binding	Gene Ontology	GO:0031402	2	5	0.0191343	0.177262	SLC34A2	PDXK	http://amigo.geneontology.org/amigo/term/GO:0031402
negative regulation of growth	Gene Ontology	GO:0045926	2	5	0.0191343	0.177262	ING4	PNPT1	http://amigo.geneontology.org/amigo/term/GO:0045926
telomere capping	Gene Ontology	GO:0016233	2	5	0.0191343	0.177262	POT1	PRKDC	http://amigo.geneontology.org/amigo/term/GO:0016233
regulation of regulatory T cell differentiation	Gene Ontology	GO:0045589	2	5	0.0191343	0.177262	FANCA	FANCD2	http://amigo.geneontology.org/amigo/term/GO:0045589
negative regulation of macrophage chemotaxis	Gene Ontology	GO:0010760	2	5	0.0191343	0.177262	MMP28	C5	http://amigo.geneontology.org/amigo/term/GO:0010760
negative regulation of cholesterol storage	Gene Ontology	GO:0010887	2	5	0.0191343	0.177262	PPARD	NR1H3	http://amigo.geneontology.org/amigo/term/GO:0010887
alpha-beta T cell differentiation	Gene Ontology	GO:0046632	2	5	0.0191343	0.177262	TCF7	PRR7	http://amigo.geneontology.org/amigo/term/GO:0046632
meiotic spindle organization	Gene Ontology	GO:0000212	2	5	0.0191343	0.177262	ATRX	MYH9	http://amigo.geneontology.org/amigo/term/GO:0000212
regulation of aerobic respiration	Gene Ontology	GO:1903715	2	5	0.0191343	0.177262	IDE	CBFA2T3	http://amigo.geneontology.org/amigo/term/GO:1903715
CIA complex	Gene Ontology	GO:0097361	2	5	0.0191343	0.177262	CIAO1	MMS19	http://amigo.geneontology.org/amigo/term/GO:0097361
regulation of smooth muscle cell proliferation	Gene Ontology	GO:0048660	2	5	0.0191343	0.177262	CTNNB1	PRKDC	http://amigo.geneontology.org/amigo/term/GO:0048660
T cell receptor V(D)J recombination	Gene Ontology	GO:0033153	2	5	0.0191343	0.177262	TCF7	PRKDC	http://amigo.geneontology.org/amigo/term/GO:0033153
small molecule binding	Gene Ontology	GO:0036094	2	5	0.0191343	0.177262	EXFABP	ALB	http://amigo.geneontology.org/amigo/term/GO:0036094
DNA replication factor C complex	Gene Ontology	GO:0005663	2	5	0.0191343	0.177262	RFC4	RFC1	http://amigo.geneontology.org/amigo/term/GO:0005663
establishment of Golgi localization	Gene Ontology	GO:0051683	2	5	0.0191343	0.177262	PDCD10	SLC9A3R1	http://amigo.geneontology.org/amigo/term/GO:0051683
cell cycle phase transition	Gene Ontology	GO:0044770	2	5	0.0191343	0.177262	PTPRC	TIPIN	http://amigo.geneontology.org/amigo/term/GO:0044770
negative regulation of blood vessel endothelial cell proliferation involved in sprouting angiogenesis	Gene Ontology	GO:1903588	2	5	0.0191343	0.177262	PDCD10	DLL4	http://amigo.geneontology.org/amigo/term/GO:1903588
succinate transmembrane transport	Gene Ontology	GO:0071422	2	5	0.0191343	0.177262	SLC25A30	SLC25A10	http://amigo.geneontology.org/amigo/term/GO:0071422
single-stranded telomeric DNA binding	Gene Ontology	GO:0043047	2	5	0.0191343	0.177262	HNRNPA2B1	POT1	http://amigo.geneontology.org/amigo/term/GO:0043047
cell differentiation	Gene Ontology	GO:0030154	16	266	0.0192572	0.177774	HHEX	EXT2	HNF4beta	PRRC2C	NAP1L1	NAP1L4	CBFA2T3	TAF8	PPARD	RB1	RBL1	EXFABP	LYN	NR2F2	THOC5	NR1H3	http://amigo.geneontology.org/amigo/term/GO:0030154
microtubule cytoskeleton	Gene Ontology	GO:0015630	6	61	0.019759	0.181769	TAF1A	RASSF1	SPTAN1	MTUS1	MYCBP2	MCM2	http://amigo.geneontology.org/amigo/term/GO:0015630
positive regulation of Notch signaling pathway	Gene Ontology	GO:0045747	4	29	0.0200927	0.18292	PDCD10	DLL1	LFNG	DLL4	http://amigo.geneontology.org/amigo/term/GO:0045747
protein self-association	Gene Ontology	GO:0043621	4	29	0.0200927	0.18292	MYH9	ZNF639	CCDC88C	SLC9A3R1	http://amigo.geneontology.org/amigo/term/GO:0043621
kinase binding	Gene Ontology	GO:0019900	5	45	0.0210613	0.188935	FAS	MYOM1	WWC2	RB1	TNS2	http://amigo.geneontology.org/amigo/term/GO:0019900
K63-linked polyubiquitin modification-dependent protein binding	Gene Ontology	GO:0070530	3	16	0.0213279	0.188935	OPTN	OTUD7B	UBXN7	http://amigo.geneontology.org/amigo/term/GO:0070530
ribosome biogenesis	Gene Ontology	GO:0042254	3	16	0.0213279	0.188935	MRPL10	CEBPZ	PRKDC	http://amigo.geneontology.org/amigo/term/GO:0042254
RNA polymerase III complex	Gene Ontology	GO:0005666	3	16	0.0213279	0.188935	CRCP	POLR2H	POLR2K	http://amigo.geneontology.org/amigo/term/GO:0005666
MAP kinase activity	Gene Ontology	GO:0004707	3	16	0.0213279	0.188935	ICK	NLK	MAPK11	http://amigo.geneontology.org/amigo/term/GO:0004707
sulfate transmembrane transport	Gene Ontology	GO:1902358	3	16	0.0213279	0.188935	SLC26A11	SLC25A30	SLC25A10	http://amigo.geneontology.org/amigo/term/GO:1902358
positive regulation of apoptotic signaling pathway	Gene Ontology	GO:2001235	3	16	0.0213279	0.188935	CTSH	DAB2IP	TRAF7	http://amigo.geneontology.org/amigo/term/GO:2001235
membrane protein ectodomain proteolysis	Gene Ontology	GO:0006509	3	16	0.0213279	0.188935	SPPL2A	MYH9	ADAM9	http://amigo.geneontology.org/amigo/term/GO:0006509
protein kinase binding	Gene Ontology	GO:0019901	16	270	0.0216374	0.191034	STRIP1	PFKFB2	VRK1	VRK2	PLK1	ZC3HC1	PRKAG2	KAT2B	PARP1	CTNNB1	ITGB2	PTPRC	KIF11	PDCD10	MAPRE3	ATF2	http://amigo.geneontology.org/amigo/term/GO:0019901
regulation of cytokinesis	Gene Ontology	GO:0032465	4	30	0.0222133	0.192165	RAB11FIP3	PLK1	BRCA2	SETD2	http://amigo.geneontology.org/amigo/term/GO:0032465
endosome	Gene Ontology	GO:0005768	11	161	0.022227	0.192165	COMMD1	PACSIN3	ARPC2	STAMBP	TNFAIP1	RAB11B	SMPD1	FLOT1	RNF215	MTMR4	CYBA	http://amigo.geneontology.org/amigo/term/GO:0005768
motile cilium	Gene Ontology	GO:0031514	4	31	0.0244654	0.192165	SORD	ARL13B	OFD1	SCNN1A	http://amigo.geneontology.org/amigo/term/GO:0031514
limb development	Gene Ontology	GO:0060173	4	31	0.0244654	0.192165	CTNNB1	SLC39A3	RC3H2	NR2F2	http://amigo.geneontology.org/amigo/term/GO:0060173
negative regulation of cyclin-dependent protein serine/threonine kinase activity	Gene Ontology	GO:0045736	3	17	0.0245103	0.192165	PLK1	KAT2B	NR2F2	http://amigo.geneontology.org/amigo/term/GO:0045736
NADP binding	Gene Ontology	GO:0050661	3	17	0.0245103	0.192165	FMO3	NDOR1	CAT	http://amigo.geneontology.org/amigo/term/GO:0050661
neuromuscular synaptic transmission	Gene Ontology	GO:0007274	3	17	0.0245103	0.192165	TSPOAP1	RIMBP2	ADARB1	http://amigo.geneontology.org/amigo/term/GO:0007274
positive regulation of extrinsic apoptotic signaling pathway	Gene Ontology	GO:2001238	3	17	0.0245103	0.192165	PDIA3	BID	PTPRC	http://amigo.geneontology.org/amigo/term/GO:2001238
positive regulation of cell cycle arrest	Gene Ontology	GO:0071158	3	17	0.0245103	0.192165	DAB2IP	ZBTB17	TGFB1	http://amigo.geneontology.org/amigo/term/GO:0071158
triglyceride metabolic process	Gene Ontology	GO:0006641	3	17	0.0245103	0.192165	PTPN11	SEL1L	CAT	http://amigo.geneontology.org/amigo/term/GO:0006641
pyridoxal phosphate binding	Gene Ontology	GO:0030170	5	47	0.0245404	0.192165	DDC	PHYKPL	KYAT3	ALB	PDXK	http://amigo.geneontology.org/amigo/term/GO:0030170
negative regulation of angiogenesis	Gene Ontology	GO:0016525	5	47	0.0245404	0.192165	CTNNB1	HHEX	DAB2IP	SULF1	ATF2	http://amigo.geneontology.org/amigo/term/GO:0016525
Wnt signalosome	Gene Ontology	GO:1990909	2	6	0.0249792	0.192165	CTNNB1	RECK	http://amigo.geneontology.org/amigo/term/GO:1990909
fatty acid homeostasis	Gene Ontology	GO:0055089	2	6	0.0249792	0.192165	EXFABP	SIRT1	http://amigo.geneontology.org/amigo/term/GO:0055089
blood circulation	Gene Ontology	GO:0008015	2	6	0.0249792	0.192165	F5	CHD7	http://amigo.geneontology.org/amigo/term/GO:0008015
positive regulation of interleukin-17 production	Gene Ontology	GO:0032740	2	6	0.0249792	0.192165	IL18	TGFB1	http://amigo.geneontology.org/amigo/term/GO:0032740
ciliary tip	Gene Ontology	GO:0097542	2	6	0.0249792	0.192165	ICK	ARMC9	http://amigo.geneontology.org/amigo/term/GO:0097542
calcium channel inhibitor activity	Gene Ontology	GO:0019855	2	6	0.0249792	0.192165	ITPR1	PACSIN3	http://amigo.geneontology.org/amigo/term/GO:0019855
histone methylation	Gene Ontology	GO:0016571	2	6	0.0249792	0.192165	SATB1	PRDM11	http://amigo.geneontology.org/amigo/term/GO:0016571
protein maturation by iron-sulfur cluster transfer	Gene Ontology	GO:0097428	2	6	0.0249792	0.192165	CIAO1	MMS19	http://amigo.geneontology.org/amigo/term/GO:0097428
7S RNA binding	Gene Ontology	GO:0008312	2	6	0.0249792	0.192165	SRP72	SRP54	http://amigo.geneontology.org/amigo/term/GO:0008312
sulfate transport	Gene Ontology	GO:0008272	2	6	0.0249792	0.192165	SLC25A30	SLC25A10	http://amigo.geneontology.org/amigo/term/GO:0008272
malate metabolic process	Gene Ontology	GO:0006108	2	6	0.0249792	0.192165	FH	MDH2	http://amigo.geneontology.org/amigo/term/GO:0006108
peroxisome proliferator activated receptor signaling pathway	Gene Ontology	GO:0035357	2	6	0.0249792	0.192165	FAM120B	ACTN4	http://amigo.geneontology.org/amigo/term/GO:0035357
blood vessel maturation	Gene Ontology	GO:0001955	2	6	0.0249792	0.192165	RECK	VEGFA	http://amigo.geneontology.org/amigo/term/GO:0001955
regulation of glycolytic process	Gene Ontology	GO:0006110	2	6	0.0249792	0.192165	OGT	PRKAG2	http://amigo.geneontology.org/amigo/term/GO:0006110
positive regulation of cysteine-type endopeptidase activity involved in apoptotic signaling pathway	Gene Ontology	GO:2001269	2	6	0.0249792	0.192165	FAS	PRR7	http://amigo.geneontology.org/amigo/term/GO:2001269
phosphatidylinositol metabolic process	Gene Ontology	GO:0046488	2	6	0.0249792	0.192165	CHRM4	PLEK	http://amigo.geneontology.org/amigo/term/GO:0046488
error-prone translesion synthesis	Gene Ontology	GO:0042276	2	6	0.0249792	0.192165	POLE2	PRIMPOL	http://amigo.geneontology.org/amigo/term/GO:0042276
cellular phosphate ion homeostasis	Gene Ontology	GO:0030643	2	6	0.0249792	0.192165	SLC9A3R1	SLC34A2	http://amigo.geneontology.org/amigo/term/GO:0030643
cellular response to UV-B	Gene Ontology	GO:0071493	2	6	0.0249792	0.192165	HYAL3	CRIP1	http://amigo.geneontology.org/amigo/term/GO:0071493
positive regulation of alpha-beta T cell proliferation	Gene Ontology	GO:0046641	2	6	0.0249792	0.192165	RIPK2	PTPRC	http://amigo.geneontology.org/amigo/term/GO:0046641
mitophagy	Gene Ontology	GO:0000423	2	6	0.0249792	0.192165	PHB2	AMBRA1	http://amigo.geneontology.org/amigo/term/GO:0000423
microvillus membrane	Gene Ontology	GO:0031528	2	6	0.0249792	0.192165	CTNNB1	SLC9A3R1	http://amigo.geneontology.org/amigo/term/GO:0031528
microtubule nucleation by interphase microtubule organizing center	Gene Ontology	GO:0051415	2	6	0.0249792	0.192165	MZT1	TUBGCP5	http://amigo.geneontology.org/amigo/term/GO:0051415
posttranslational protein targeting to membrane, translocation	Gene Ontology	GO:0031204	2	6	0.0249792	0.192165	SEC61B	SEC61A2	http://amigo.geneontology.org/amigo/term/GO:0031204
signal recognition particle, endoplasmic reticulum targeting	Gene Ontology	GO:0005786	2	6	0.0249792	0.192165	SRP72	SRP54	http://amigo.geneontology.org/amigo/term/GO:0005786
surfactant homeostasis	Gene Ontology	GO:0043129	2	6	0.0249792	0.192165	CTSH	EPAS1	http://amigo.geneontology.org/amigo/term/GO:0043129
protein poly-ADP-ribosylation	Gene Ontology	GO:0070212	2	6	0.0249792	0.192165	TNKS2	PARP1	http://amigo.geneontology.org/amigo/term/GO:0070212
fatty acid transport	Gene Ontology	GO:0015908	2	6	0.0249792	0.192165	EXFABP	PPARD	http://amigo.geneontology.org/amigo/term/GO:0015908
large ribosomal subunit	Gene Ontology	GO:0015934	2	6	0.0249792	0.192165	MRPL10	RPL12	http://amigo.geneontology.org/amigo/term/GO:0015934
phosphatidylinositol binding	Gene Ontology	GO:0035091	6	65	0.0255203	0.195755	MCF2L	APPL1	SBF2	ITPR2	ITPR1	PITPNB	http://amigo.geneontology.org/amigo/term/GO:0035091
DNA duplex unwinding	Gene Ontology	GO:0032508	5	48	0.0264102	0.201992	RFC4	RAD18	POT1	CHD7	MCM8	http://amigo.geneontology.org/amigo/term/GO:0032508
transcription corepressor activity	Gene Ontology	GO:0003714	9	124	0.0266831	0.202417	E2F7	BEND6	SIRT1	TLE3	TCERG1	CBFA2T3	HSBP1L1	EZH2	CREBBP	http://amigo.geneontology.org/amigo/term/GO:0003714
anion transmembrane transport	Gene Ontology	GO:0098656	4	32	0.0268504	0.202417	VDAC3	SLC13A2	SLC9A9	SLC4A2	http://amigo.geneontology.org/amigo/term/GO:0098656
Ras protein signal transduction	Gene Ontology	GO:0007265	4	32	0.0268504	0.202417	RASSF1	DOK3	MRAS	RB1	http://amigo.geneontology.org/amigo/term/GO:0007265
negative regulation of cold-induced thermogenesis	Gene Ontology	GO:0120163	4	32	0.0268504	0.202417	TLE3	IL18R1	RB1	NR1H3	http://amigo.geneontology.org/amigo/term/GO:0120163
promoter-specific chromatin binding	Gene Ontology	GO:1990841	4	32	0.0268504	0.202417	EZH2	RBL1	CHD7	NUP98	http://amigo.geneontology.org/amigo/term/GO:1990841
unfolded protein binding	Gene Ontology	GO:0051082	6	66	0.0271179	0.203849	GRPEL2	CCT2	HSPA9	HSP90B1	PDRG1	NPM1	http://amigo.geneontology.org/amigo/term/GO:0051082
spermatogenesis	Gene Ontology	GO:0007283	9	125	0.0278294	0.204151	DAZAP1	SIRT1	BRCA2	NAIF1	KIAA1524	HSF2	GPX4	ATRX	MOV10L1	http://amigo.geneontology.org/amigo/term/GO:0007283
positive regulation of vascular endothelial growth factor production	Gene Ontology	GO:0010575	3	18	0.0279339	0.204151	C3	C5	SULF1	http://amigo.geneontology.org/amigo/term/GO:0010575
blood vessel remodeling	Gene Ontology	GO:0001974	3	18	0.0279339	0.204151	EPAS1	DLL4	CHD7	http://amigo.geneontology.org/amigo/term/GO:0001974
neural tube development	Gene Ontology	GO:0021915	3	18	0.0279339	0.204151	AMBRA1	TCF7	NUP133	http://amigo.geneontology.org/amigo/term/GO:0021915
ephrin receptor binding	Gene Ontology	GO:0046875	3	18	0.0279339	0.204151	SIPA1L1	EFNB2	LYN	http://amigo.geneontology.org/amigo/term/GO:0046875
structural constituent of nuclear pore	Gene Ontology	GO:0017056	3	18	0.0279339	0.204151	NUP214	NUP133	NUP98	http://amigo.geneontology.org/amigo/term/GO:0017056
protein-membrane adaptor activity	Gene Ontology	GO:0043495	3	18	0.0279339	0.204151	SUN2	SLC9A3R1	MYH9	http://amigo.geneontology.org/amigo/term/GO:0043495
condensed nuclear chromosome	Gene Ontology	GO:0000794	3	18	0.0279339	0.204151	SUN2	NIFK	TOPBP1	http://amigo.geneontology.org/amigo/term/GO:0000794
histone acetyltransferase complex	Gene Ontology	GO:0000123	3	18	0.0279339	0.204151	ING4	OGT	CREBBP	http://amigo.geneontology.org/amigo/term/GO:0000123
T cell homeostasis	Gene Ontology	GO:0043029	3	18	0.0279339	0.204151	TGFB1	SLC39A3	RC3H2	http://amigo.geneontology.org/amigo/term/GO:0043029
cadherin binding	Gene Ontology	GO:0045296	5	49	0.0283685	0.205613	CTNNB1	PTPN11	PKP4	CTNNAL1	ARVCF	http://amigo.geneontology.org/amigo/term/GO:0045296
mRNA 3'-UTR binding	Gene Ontology	GO:0003730	5	49	0.0283685	0.205613	DAZAP1	IGF2BP3	CARHSP1	HNRNPA2B1	LARP1	http://amigo.geneontology.org/amigo/term/GO:0003730
protease binding	Gene Ontology	GO:0002020	5	49	0.0283685	0.205613	CHL1	VWF	ITGA3	THAP5	BRCA2	http://amigo.geneontology.org/amigo/term/GO:0002020
nuclear speck	Gene Ontology	GO:0016607	14	235	0.0292207	0.208879	E2F7	EPAS1	ELL	PLRG1	PRPF4B	HBP1	YLPM1	SRSF11	BRD2	DENND1B	TRIP12	TAF5L	RBM39	FTO	http://amigo.geneontology.org/amigo/term/GO:0016607
scaffold protein binding	Gene Ontology	GO:0097110	4	33	0.0293696	0.208879	CRIPT	DLL1	ITPR2	KRT18	http://amigo.geneontology.org/amigo/term/GO:0097110
non-motile cilium assembly	Gene Ontology	GO:1905515	4	33	0.0293696	0.208879	ARL13B	VANGL2	IFT57	DISC1	http://amigo.geneontology.org/amigo/term/GO:1905515
regulation of inflammatory response	Gene Ontology	GO:0050727	4	33	0.0293696	0.208879	IL1R1	LYN	FANCA	FANCD2	http://amigo.geneontology.org/amigo/term/GO:0050727
negative regulation of cell growth	Gene Ontology	GO:0030308	6	68	0.0305083	0.208879	TGFB1	SIRT1	PHB	RB1	NAIF1	SERPINE2	http://amigo.geneontology.org/amigo/term/GO:0030308
nuclear chromatin	Gene Ontology	GO:0000790	10	149	0.031381	0.208879	HSF2	NASP	TAF4	TIPIN	ASXL2	PPARD	EZH2	NUCKS1	TAF5L	CREBBP	http://amigo.geneontology.org/amigo/term/GO:0000790
perinuclear region of cytoplasm	Gene Ontology	GO:0048471	17	307	0.0314046	0.208879	STX8	OPTN	TNKS2	ACTN4	SLC9A3R1	FBXL5	HSP90B1	PRR7	CTNNB1	NDOR1	PKP4	ATP6V0A2	COBL	LYN	COPS5	XRCC3	NLRC3	http://amigo.geneontology.org/amigo/term/GO:0048471
regulation of gastrulation	Gene Ontology	GO:0010470	2	7	0.0314468	0.208879	PHLDB1	CLASP1	http://amigo.geneontology.org/amigo/term/GO:0010470
regulation of DNA-binding transcription factor activity	Gene Ontology	GO:0051090	2	7	0.0314468	0.208879	FANCA	FANCD2	http://amigo.geneontology.org/amigo/term/GO:0051090
Wnt signaling pathway, planar cell polarity pathway	Gene Ontology	GO:0060071	2	7	0.0314468	0.208879	VANGL2	MED12	http://amigo.geneontology.org/amigo/term/GO:0060071
SRP-dependent cotranslational protein targeting to membrane	Gene Ontology	GO:0006614	2	7	0.0314468	0.208879	SRP72	SRPRA	http://amigo.geneontology.org/amigo/term/GO:0006614
positive regulation of macrophage activation	Gene Ontology	GO:0043032	2	7	0.0314468	0.208879	WNT5A	IL1RL1	http://amigo.geneontology.org/amigo/term/GO:0043032
regulation of cell division	Gene Ontology	GO:0051302	2	7	0.0314468	0.208879	DLL1	RBL1	http://amigo.geneontology.org/amigo/term/GO:0051302
positive regulation of DNA-templated transcription, initiation	Gene Ontology	GO:2000144	2	7	0.0314468	0.208879	CTNNB1	SETX	http://amigo.geneontology.org/amigo/term/GO:2000144
cell-substrate adhesion	Gene Ontology	GO:0031589	2	7	0.0314468	0.208879	PPARD	VWF	http://amigo.geneontology.org/amigo/term/GO:0031589
regulation of postsynaptic cytosolic calcium ion concentration	Gene Ontology	GO:0099566	2	7	0.0314468	0.208879	WNT5A	ITPR1	http://amigo.geneontology.org/amigo/term/GO:0099566
replication fork protection	Gene Ontology	GO:0048478	2	7	0.0314468	0.208879	BRCA2	TIPIN	http://amigo.geneontology.org/amigo/term/GO:0048478
marginal zone B cell differentiation	Gene Ontology	GO:0002315	2	7	0.0314468	0.208879	DLL1	LFNG	http://amigo.geneontology.org/amigo/term/GO:0002315
G-rich strand telomeric DNA binding	Gene Ontology	GO:0098505	2	7	0.0314468	0.208879	NABP2	POT1	http://amigo.geneontology.org/amigo/term/GO:0098505
negative regulation of protein kinase activity by regulation of protein phosphorylation	Gene Ontology	GO:0044387	2	7	0.0314468	0.208879	CORO1C	ADARB1	http://amigo.geneontology.org/amigo/term/GO:0044387
nucleosome positioning	Gene Ontology	GO:0016584	2	7	0.0314468	0.208879	SMARCA5	RSF1	http://amigo.geneontology.org/amigo/term/GO:0016584
ribosomal small subunit biogenesis	Gene Ontology	GO:0042274	2	7	0.0314468	0.208879	NPM1	SURF6	http://amigo.geneontology.org/amigo/term/GO:0042274
regulation of microtubule polymerization	Gene Ontology	GO:0031113	2	7	0.0314468	0.208879	MAPRE3	PRUNE1	http://amigo.geneontology.org/amigo/term/GO:0031113
glucose binding	Gene Ontology	GO:0005536	2	7	0.0314468	0.208879	HK2	SLC2A14	http://amigo.geneontology.org/amigo/term/GO:0005536
membrane protein proteolysis	Gene Ontology	GO:0033619	2	7	0.0314468	0.208879	SPPL2A	CTSH	http://amigo.geneontology.org/amigo/term/GO:0033619
cullin family protein binding	Gene Ontology	GO:0097602	3	19	0.0315978	0.208879	DCUN1D2	DDB1	KCTD17	http://amigo.geneontology.org/amigo/term/GO:0097602
RNA polymerase II general transcription initiation factor activity	Gene Ontology	GO:0016251	3	19	0.0315978	0.208879	TAF6	TAF4	GTF2E1	http://amigo.geneontology.org/amigo/term/GO:0016251
positive regulation of telomerase activity	Gene Ontology	GO:0051973	3	19	0.0315978	0.208879	CCT2	CTNNB1	POT1	http://amigo.geneontology.org/amigo/term/GO:0051973
MLL1 complex	Gene Ontology	GO:0071339	3	19	0.0315978	0.208879	TAF6	MGA	TAF4	http://amigo.geneontology.org/amigo/term/GO:0071339
spindle midzone	Gene Ontology	GO:0051233	3	19	0.0315978	0.208879	PLK1	PKP4	MAPRE3	http://amigo.geneontology.org/amigo/term/GO:0051233
mRNA 5'-UTR binding	Gene Ontology	GO:0048027	3	19	0.0315978	0.208879	LARP1	SYNCRIP	RPS14	http://amigo.geneontology.org/amigo/term/GO:0048027
positive regulation of viral genome replication	Gene Ontology	GO:0045070	3	19	0.0315978	0.208879	LARP1	DDB1	ADARB1	http://amigo.geneontology.org/amigo/term/GO:0045070
proteasome-mediated ubiquitin-dependent protein catabolic process	Gene Ontology	GO:0043161	8	108	0.0322184	0.212447	SIRT1	KCTD17	TBX21	TNFAIP1	CTNNB1	WWP2	DDB1	CUL1	http://amigo.geneontology.org/amigo/term/GO:0043161
positive regulation of angiogenesis	Gene Ontology	GO:0045766	6	70	0.0341645	0.224548	CTSH	SIRT1	HK2	VEGFA	C3	WNT5A	http://amigo.geneontology.org/amigo/term/GO:0045766
mitochondrial membrane	Gene Ontology	GO:0031966	4	35	0.0348147	0.224548	SORD	ABCB8	SLC25A30	VRK2	http://amigo.geneontology.org/amigo/term/GO:0031966
ATPase-coupled transmembrane transporter activity	Gene Ontology	GO:0042626	4	35	0.0348147	0.224548	ABCD2	ABCC6	ABCB8	ABCC1	http://amigo.geneontology.org/amigo/term/GO:0042626
double-strand break repair	Gene Ontology	GO:0006302	4	35	0.0348147	0.224548	UBXN7	SETX	PARP1	PRKDC	http://amigo.geneontology.org/amigo/term/GO:0006302
nuclear inner membrane	Gene Ontology	GO:0005637	3	20	0.0355	0.224548	SIRT1	ITPR1	DPY19L4	http://amigo.geneontology.org/amigo/term/GO:0005637
metallopeptidase activity	Gene Ontology	GO:0008237	3	20	0.0355	0.224548	DNPEP	STAMBP	COPS5	http://amigo.geneontology.org/amigo/term/GO:0008237
iron ion homeostasis	Gene Ontology	GO:0055072	3	20	0.0355	0.224548	EPAS1	BDH2	FBXL5	http://amigo.geneontology.org/amigo/term/GO:0055072
positive regulation of telomere maintenance via telomerase	Gene Ontology	GO:0032212	3	20	0.0355	0.224548	CCT2	CTNNB1	POT1	http://amigo.geneontology.org/amigo/term/GO:0032212
lipopolysaccharide-mediated signaling pathway	Gene Ontology	GO:0031663	3	20	0.0355	0.224548	IL18	LYN	RIPK2	http://amigo.geneontology.org/amigo/term/GO:0031663
positive regulation of NF-kappaB transcription factor activity	Gene Ontology	GO:0051092	6	71	0.0360941	0.224548	IL18	IL18RAP	IL18R1	CAT	RIPK2	WNT5A	http://amigo.geneontology.org/amigo/term/GO:0051092
midbody	Gene Ontology	GO:0030496	7	91	0.0370956	0.224548	RAB11FIP3	PLK1	HSP90B1	PKP4	ANXA11	MAPRE3	NAT10	http://amigo.geneontology.org/amigo/term/GO:0030496
positive regulation of cold-induced thermogenesis	Gene Ontology	GO:0120162	5	53	0.0371067	0.224548	FH	OGT	DECR1	ADRB1	EPAS1	http://amigo.geneontology.org/amigo/term/GO:0120162
negative regulation of inflammatory response	Gene Ontology	GO:0050728	5	53	0.0371067	0.224548	ACP5	PPARD	NR1H3	RB1	NLRC3	http://amigo.geneontology.org/amigo/term/GO:0050728
central nervous system projection neuron axonogenesis	Gene Ontology	GO:0021952	2	8	0.0384916	0.224548	EPHB6	MYCBP2	http://amigo.geneontology.org/amigo/term/GO:0021952
positive regulation of viral release from host cell	Gene Ontology	GO:1902188	2	8	0.0384916	0.224548	DDB1	VPS4B	http://amigo.geneontology.org/amigo/term/GO:1902188
negative regulation of organ growth	Gene Ontology	GO:0046621	2	8	0.0384916	0.224548	WWC2	STK4	http://amigo.geneontology.org/amigo/term/GO:0046621
nuclear pore outer ring	Gene Ontology	GO:0031080	2	8	0.0384916	0.224548	NUP133	NUP98	http://amigo.geneontology.org/amigo/term/GO:0031080
nuclear inclusion body	Gene Ontology	GO:0042405	2	8	0.0384916	0.224548	RAD18	NUP98	http://amigo.geneontology.org/amigo/term/GO:0042405
positive regulation of isotype switching to IgG isotypes	Gene Ontology	GO:0048304	2	8	0.0384916	0.224548	TBX21	PTPRC	http://amigo.geneontology.org/amigo/term/GO:0048304
positive regulation of fibroblast migration	Gene Ontology	GO:0010763	2	8	0.0384916	0.224548	TGFB1	BAG4	http://amigo.geneontology.org/amigo/term/GO:0010763
nuclear replication fork	Gene Ontology	GO:0043596	2	8	0.0384916	0.224548	SMARCAD1	SMARCA5	http://amigo.geneontology.org/amigo/term/GO:0043596
potassium ion binding	Gene Ontology	GO:0030955	2	8	0.0384916	0.224548	ADPRH	PDXK	http://amigo.geneontology.org/amigo/term/GO:0030955
positive regulation of interferon-alpha production	Gene Ontology	GO:0032727	2	8	0.0384916	0.224548	IFIH1	SETD2	http://amigo.geneontology.org/amigo/term/GO:0032727
hepatocyte differentiation	Gene Ontology	GO:0070365	2	8	0.0384916	0.224548	E2F7	HHEX	http://amigo.geneontology.org/amigo/term/GO:0070365
5S rRNA binding	Gene Ontology	GO:0008097	2	8	0.0384916	0.224548	MRPL18	RPL11	http://amigo.geneontology.org/amigo/term/GO:0008097
embryonic heart tube development	Gene Ontology	GO:0035050	2	8	0.0384916	0.224548	CTNNB1	HHEX	http://amigo.geneontology.org/amigo/term/GO:0035050
histone H2A monoubiquitination	Gene Ontology	GO:0035518	2	8	0.0384916	0.224548	DDB1	UBXN7	http://amigo.geneontology.org/amigo/term/GO:0035518
neuron-neuron synaptic transmission	Gene Ontology	GO:0007270	2	8	0.0384916	0.224548	VDAC3	ARID1B	http://amigo.geneontology.org/amigo/term/GO:0007270
RNA export from nucleus	Gene Ontology	GO:0006405	2	8	0.0384916	0.224548	NUP214	NUP133	http://amigo.geneontology.org/amigo/term/GO:0006405
poly(G) binding	Gene Ontology	GO:0034046	2	8	0.0384916	0.224548	DAZAP1	PNPT1	http://amigo.geneontology.org/amigo/term/GO:0034046
inositol 1,4,5 trisphosphate binding	Gene Ontology	GO:0070679	2	8	0.0384916	0.224548	ITPR2	ITPR1	http://amigo.geneontology.org/amigo/term/GO:0070679
ectoderm development	Gene Ontology	GO:0007398	2	8	0.0384916	0.224548	CTNNB1	ZBTB17	http://amigo.geneontology.org/amigo/term/GO:0007398
double-strand break repair via break-induced replication	Gene Ontology	GO:0000727	2	8	0.0384916	0.224548	CDC45	MCM2	http://amigo.geneontology.org/amigo/term/GO:0000727
negative regulation of protein processing	Gene Ontology	GO:0010955	2	8	0.0384916	0.224548	GLG1	TMEM59	http://amigo.geneontology.org/amigo/term/GO:0010955
catalytic complex	Gene Ontology	GO:1902494	2	8	0.0384916	0.224548	QPRT	DECR1	http://amigo.geneontology.org/amigo/term/GO:1902494
regulation of epidermal growth factor receptor signaling pathway	Gene Ontology	GO:0042058	2	8	0.0384916	0.224548	RHBDF1	RHBDF2	http://amigo.geneontology.org/amigo/term/GO:0042058
positive regulation of insulin receptor signaling pathway	Gene Ontology	GO:0046628	2	8	0.0384916	0.224548	PTPN11	SIRT1	http://amigo.geneontology.org/amigo/term/GO:0046628
transforming growth factor beta receptor binding	Gene Ontology	GO:0005160	2	8	0.0384916	0.224548	TGFB1	TGFBRAP1	http://amigo.geneontology.org/amigo/term/GO:0005160
phosphatidylinositol 3-kinase regulatory subunit binding	Gene Ontology	GO:0036312	2	8	0.0384916	0.224548	PTPN13	DAB2IP	http://amigo.geneontology.org/amigo/term/GO:0036312
protein localization to chromosome, telomeric region	Gene Ontology	GO:0070198	2	8	0.0384916	0.224548	ATRX	TNKS2	http://amigo.geneontology.org/amigo/term/GO:0070198
regulation of axon guidance	Gene Ontology	GO:1902667	2	8	0.0384916	0.224548	ZSWIM8	MYCBP2	http://amigo.geneontology.org/amigo/term/GO:1902667
protein auto-ADP-ribosylation	Gene Ontology	GO:0070213	2	8	0.0384916	0.224548	TNKS2	PARP1	http://amigo.geneontology.org/amigo/term/GO:0070213
fructose metabolic process	Gene Ontology	GO:0006000	2	8	0.0384916	0.224548	SORD	PFKFB2	http://amigo.geneontology.org/amigo/term/GO:0006000
positive regulation of dendrite development	Gene Ontology	GO:1900006	2	8	0.0384916	0.224548	COBL	DAB2IP	http://amigo.geneontology.org/amigo/term/GO:1900006
DNA damage response, signal transduction by p53 class mediator resulting in transcription of p21 class mediator	Gene Ontology	GO:0006978	2	8	0.0384916	0.224548	ING4	BRCA2	http://amigo.geneontology.org/amigo/term/GO:0006978
I band	Gene Ontology	GO:0031674	2	8	0.0384916	0.224548	KAT2B	SMTNL2	http://amigo.geneontology.org/amigo/term/GO:0031674
regulation of mRNA splicing, via spliceosome	Gene Ontology	GO:0048024	2	8	0.0384916	0.224548	RBM39	METTL16	http://amigo.geneontology.org/amigo/term/GO:0048024
regulation of chondrocyte differentiation	Gene Ontology	GO:0032330	2	8	0.0384916	0.224548	GLG1	SCIN	http://amigo.geneontology.org/amigo/term/GO:0032330
regulation of fibroblast migration	Gene Ontology	GO:0010762	2	8	0.0384916	0.224548	APPL1	CORO1C	http://amigo.geneontology.org/amigo/term/GO:0010762
rRNA processing	Gene Ontology	GO:0006364	5	54	0.0395216	0.224758	MDN1	RRP12	RPL11	CHD7	MPHOSPH10	http://amigo.geneontology.org/amigo/term/GO:0006364
nuclear matrix	Gene Ontology	GO:0016363	5	54	0.0395216	0.224758	PHB2	SFPQ	DCAF7	KIN	SATB1	http://amigo.geneontology.org/amigo/term/GO:0016363
T cell receptor signaling pathway	Gene Ontology	GO:0050852	5	54	0.0395216	0.224758	LCP2	RIPK2	RC3H2	PTPRC	DENND1B	http://amigo.geneontology.org/amigo/term/GO:0050852
nuclear chromosome, telomeric region	Gene Ontology	GO:0000784	5	54	0.0395216	0.224758	SUN2	BRCA2	NABP2	THOC5	POT1	http://amigo.geneontology.org/amigo/term/GO:0000784
spindle assembly	Gene Ontology	GO:0051225	3	21	0.0396381	0.224758	INO80	MAPRE3	TUBGCP5	http://amigo.geneontology.org/amigo/term/GO:0051225
negative regulation of Notch signaling pathway	Gene Ontology	GO:0045746	3	21	0.0396381	0.224758	BEND6	DLL1	DLL4	http://amigo.geneontology.org/amigo/term/GO:0045746
replication fork processing	Gene Ontology	GO:0031297	3	21	0.0396381	0.224758	ATRX	PRIMPOL	NUCKS1	http://amigo.geneontology.org/amigo/term/GO:0031297
cell periphery	Gene Ontology	GO:0071944	3	21	0.0396381	0.224758	PHB2	SLC9A3R1	KRT18	http://amigo.geneontology.org/amigo/term/GO:0071944
positive regulation of Wnt signaling pathway	Gene Ontology	GO:0030177	3	21	0.0396381	0.224758	DISC1	HHEX	SULF1	http://amigo.geneontology.org/amigo/term/GO:0030177
T cell differentiation in thymus	Gene Ontology	GO:0033077	3	21	0.0396381	0.224758	CTNNB1	PRKDC	PRR7	http://amigo.geneontology.org/amigo/term/GO:0033077
glycolytic process	Gene Ontology	GO:0006096	3	21	0.0396381	0.224758	HK2	ENO1	PFKFB2	http://amigo.geneontology.org/amigo/term/GO:0006096
carbohydrate phosphorylation	Gene Ontology	GO:0046835	3	21	0.0396381	0.224758	HK2	PFKFB2	GALK2	http://amigo.geneontology.org/amigo/term/GO:0046835
response to toxic substance	Gene Ontology	GO:0009636	3	21	0.0396381	0.224758	DDC	EXFABP	WAPL	http://amigo.geneontology.org/amigo/term/GO:0009636
positive regulation of translation	Gene Ontology	GO:0045727	4	37	0.0408059	0.230387	PLXNB2	UPF3B	FAM129A	NAT10	http://amigo.geneontology.org/amigo/term/GO:0045727
positive regulation of protein ubiquitination	Gene Ontology	GO:0031398	4	37	0.0408059	0.230387	AMER1	COMMD1	RIPK2	MYCBP2	http://amigo.geneontology.org/amigo/term/GO:0031398
ubiquitin-dependent protein catabolic process	Gene Ontology	GO:0006511	11	179	0.0414894	0.233405	HERPUD1	WWP2	FBXL5	UBE2D1	RNF128	RNF215	TRIP12	UBXN7	FBXL20	CUL1	RNF213	http://amigo.geneontology.org/amigo/term/GO:0006511
positive regulation of ERK1 and ERK2 cascade	Gene Ontology	GO:0070374	8	114	0.0415178	0.233405	GLIPR2	PHB2	PHB	PTPN11	RIPK2	PTPRC	PLA2G2E	FGG	http://amigo.geneontology.org/amigo/term/GO:0070374
extracellular exosome	Gene Ontology	GO:0070062	5	55	0.04203	0.235361	SORD	GART	ALB	HNRNPA2B1	SCNN1A	http://amigo.geneontology.org/amigo/term/GO:0070062
peptidyl-serine phosphorylation	Gene Ontology	GO:0018105	8	115	0.0432238	0.235361	VRK1	VRK2	PLK1	PRPF4B	PRKDC	STK4	MAPK11	STK38L	http://amigo.geneontology.org/amigo/term/GO:0018105
DNA replication	Gene Ontology	GO:0006260	4	38	0.0440069	0.235361	ING4	TNFAIP1	RFC1	KIN	http://amigo.geneontology.org/amigo/term/GO:0006260
cellular response to oxidative stress	Gene Ontology	GO:0034599	4	38	0.0440069	0.235361	PNPT1	PARP1	FANCD2	VRK2	http://amigo.geneontology.org/amigo/term/GO:0034599
SCF-dependent proteasomal ubiquitin-dependent protein catabolic process	Gene Ontology	GO:0031146	4	38	0.0440069	0.235361	FBXL5	FBXL20	FBXO31	CUL1	http://amigo.geneontology.org/amigo/term/GO:0031146
positive regulation of peptidyl-tyrosine phosphorylation	Gene Ontology	GO:0050731	4	38	0.0440069	0.235361	VEGFA	PTPN11	RIPK2	PTPRC	http://amigo.geneontology.org/amigo/term/GO:0050731
activation of cysteine-type endopeptidase activity involved in apoptotic process	Gene Ontology	GO:0006919	4	38	0.0440069	0.235361	CTSH	BID	SENP1	IFT57	http://amigo.geneontology.org/amigo/term/GO:0006919
phosphatidylinositol-3,5-bisphosphate binding	Gene Ontology	GO:0080025	3	22	0.0440091	0.235361	SNX14	SESTD1	COMMD1	http://amigo.geneontology.org/amigo/term/GO:0080025
intracellular receptor signaling pathway	Gene Ontology	GO:0030522	3	22	0.0440091	0.235361	PPARD	NR2F2	NR1H3	http://amigo.geneontology.org/amigo/term/GO:0030522
nucleotide-excision repair	Gene Ontology	GO:0006289	3	22	0.0440091	0.235361	COMMD1	BRCA2	DDB1	http://amigo.geneontology.org/amigo/term/GO:0006289
centrosome cycle	Gene Ontology	GO:0007098	3	22	0.0440091	0.235361	PLK1	XRCC2	NPM1	http://amigo.geneontology.org/amigo/term/GO:0007098
regulation of cell adhesion	Gene Ontology	GO:0030155	3	22	0.0440091	0.235361	DLL1	LAMA1	LMO7	http://amigo.geneontology.org/amigo/term/GO:0030155
organic acid metabolic process	Gene Ontology	GO:0006082	3	22	0.0440091	0.235361	CYP2AC1	CYP2W1	CYP2U1	http://amigo.geneontology.org/amigo/term/GO:0006082
peroxisome	Gene Ontology	GO:0005777	5	56	0.0446323	0.235361	CAT	ABCD2	BAAT	PHYH	AKAP11	http://amigo.geneontology.org/amigo/term/GO:0005777
SH3 domain binding	Gene Ontology	GO:0017124	5	56	0.0446323	0.235361	LYN	ABI1	DAB2IP	CYBA	ADAM9	http://amigo.geneontology.org/amigo/term/GO:0017124
mRNA processing	Gene Ontology	GO:0006397	5	56	0.0446323	0.235361	SMNDC1	PTBP1	RBM39	RNASEL	THOC5	http://amigo.geneontology.org/amigo/term/GO:0006397
negative regulation of cell migration involved in sprouting angiogenesis	Gene Ontology	GO:0090051	2	9	0.0460703	0.235361	PDCD10	DLL4	http://amigo.geneontology.org/amigo/term/GO:0090051
type B pancreatic cell development	Gene Ontology	GO:0003323	2	9	0.0460703	0.235361	DLL1	WNT5A	http://amigo.geneontology.org/amigo/term/GO:0003323
negative regulation of substrate adhesion-dependent cell spreading	Gene Ontology	GO:1900025	2	9	0.0460703	0.235361	CORO1C	ACTN4	http://amigo.geneontology.org/amigo/term/GO:1900025
DNA clamp loader activity	Gene Ontology	GO:0003689	2	9	0.0460703	0.235361	RFC4	RFC1	http://amigo.geneontology.org/amigo/term/GO:0003689
carboxy-lyase activity	Gene Ontology	GO:0016831	2	9	0.0460703	0.235361	DDC	ACMSD	http://amigo.geneontology.org/amigo/term/GO:0016831
aminopeptidase activity	Gene Ontology	GO:0004177	2	9	0.0460703	0.235361	DNPEP	CTSH	http://amigo.geneontology.org/amigo/term/GO:0004177
condensed nuclear chromosome kinetochore	Gene Ontology	GO:0000778	2	9	0.0460703	0.235361	MIS18BP1	NUF2	http://amigo.geneontology.org/amigo/term/GO:0000778
H4 histone acetyltransferase activity	Gene Ontology	GO:0010485	2	9	0.0460703	0.235361	NAA40	BRCA2	http://amigo.geneontology.org/amigo/term/GO:0010485
regulation of innate immune response	Gene Ontology	GO:0045088	2	9	0.0460703	0.235361	APPL1	TREM-B1	http://amigo.geneontology.org/amigo/term/GO:0045088
toll-like receptor 4 signaling pathway	Gene Ontology	GO:0034142	2	9	0.0460703	0.235361	LYN	RIPK2	http://amigo.geneontology.org/amigo/term/GO:0034142
inositol phosphate-mediated signaling	Gene Ontology	GO:0048016	2	9	0.0460703	0.235361	ITPR2	ITPR1	http://amigo.geneontology.org/amigo/term/GO:0048016
nuclear export signal receptor activity	Gene Ontology	GO:0005049	2	9	0.0460703	0.235361	NUP214	XPO7	http://amigo.geneontology.org/amigo/term/GO:0005049
2-oxoglutarate metabolic process	Gene Ontology	GO:0006103	2	9	0.0460703	0.235361	KYAT3	PHYH	http://amigo.geneontology.org/amigo/term/GO:0006103
negative regulation of vascular endothelial growth factor receptor signaling pathway	Gene Ontology	GO:0030948	2	9	0.0460703	0.235361	HHEX	DAB2IP	http://amigo.geneontology.org/amigo/term/GO:0030948
MCM complex	Gene Ontology	GO:0042555	2	9	0.0460703	0.235361	MCM2	MCM8	http://amigo.geneontology.org/amigo/term/GO:0042555
peroxisome organization	Gene Ontology	GO:0007031	2	9	0.0460703	0.235361	ABCD2	PEX6	http://amigo.geneontology.org/amigo/term/GO:0007031
protein kinase C signaling	Gene Ontology	GO:0070528	2	9	0.0460703	0.235361	PLEK	FLOT1	http://amigo.geneontology.org/amigo/term/GO:0070528
positive regulation of membrane protein ectodomain proteolysis	Gene Ontology	GO:0051044	2	9	0.0460703	0.235361	PACSIN3	RGMA	http://amigo.geneontology.org/amigo/term/GO:0051044
exploration behavior	Gene Ontology	GO:0035640	2	9	0.0460703	0.235361	CHL1	ITGA3	http://amigo.geneontology.org/amigo/term/GO:0035640
forebrain morphogenesis	Gene Ontology	GO:0048853	2	9	0.0460703	0.235361	HESX1	HHEX	http://amigo.geneontology.org/amigo/term/GO:0048853
long-chain fatty acid transporter activity	Gene Ontology	GO:0005324	2	9	0.0460703	0.235361	SLC27A4	ABCD2	http://amigo.geneontology.org/amigo/term/GO:0005324
aryl hydrocarbon receptor binding	Gene Ontology	GO:0017162	2	9	0.0460703	0.235361	TAF6	TAF4	http://amigo.geneontology.org/amigo/term/GO:0017162
regulation of cell morphogenesis	Gene Ontology	GO:0022604	2	9	0.0460703	0.235361	STRIP1	BCL9L	http://amigo.geneontology.org/amigo/term/GO:0022604
protein polymerization	Gene Ontology	GO:0051258	2	9	0.0460703	0.235361	FGG	GPX4	http://amigo.geneontology.org/amigo/term/GO:0051258
negative regulation of endocytosis	Gene Ontology	GO:0045806	2	9	0.0460703	0.235361	PACSIN3	LRSAM1	http://amigo.geneontology.org/amigo/term/GO:0045806
regulation of BMP signaling pathway	Gene Ontology	GO:0030510	2	9	0.0460703	0.235361	ITGA3	RGMA	http://amigo.geneontology.org/amigo/term/GO:0030510
response to lipid	Gene Ontology	GO:0033993	2	9	0.0460703	0.235361	PPARD	VPS4B	http://amigo.geneontology.org/amigo/term/GO:0033993
ESCRT I complex	Gene Ontology	GO:0000813	2	9	0.0460703	0.235361	VPS37C	VPS37A	http://amigo.geneontology.org/amigo/term/GO:0000813
negative regulation of cAMP-dependent protein kinase activity	Gene Ontology	GO:2000480	2	9	0.0460703	0.235361	SIRT1	PRKAG2	http://amigo.geneontology.org/amigo/term/GO:2000480
leukocyte cell-cell adhesion	Gene Ontology	GO:0007159	2	9	0.0460703	0.235361	ITGB2	PTPRC	http://amigo.geneontology.org/amigo/term/GO:0007159
cell junction	Gene Ontology	GO:0030054	6	76	0.0467815	0.238531	CCDC88C	ACTN4	ABI1	DCAF13	PUF60	SCIN	http://amigo.geneontology.org/amigo/term/GO:0030054
response to hypoxia	Gene Ontology	GO:0001666	5	57	0.0473288	0.238628	ITPR2	ITPR1	VEGFA	HSP90B1	CBFA2T3	http://amigo.geneontology.org/amigo/term/GO:0001666
positive regulation of peptidyl-serine phosphorylation	Gene Ontology	GO:0033138	5	57	0.0473288	0.238628	PDCD10	WNT5A	RIPK2	STK4	BAG4	http://amigo.geneontology.org/amigo/term/GO:0033138
spindle pole	Gene Ontology	GO:0000922	5	57	0.0473288	0.238628	PLK1	PKP4	KIF11	VPS4B	TUBGCP5	http://amigo.geneontology.org/amigo/term/GO:0000922
endosome membrane	Gene Ontology	GO:0010008	5	57	0.0473288	0.238628	PIP5K1C	APPL1	DNAJC13	VPS4B	CORO1C	http://amigo.geneontology.org/amigo/term/GO:0010008
ubiquitin ligase complex	Gene Ontology	GO:0000151	5	57	0.0473288	0.238628	YPEL5	DCUN1D2	UBXN7	UBE2D1	TRAF7	http://amigo.geneontology.org/amigo/term/GO:0000151
cytoplasmic microtubule organization	Gene Ontology	GO:0031122	4	39	0.0473446	0.238628	CRIPT	CCDC88C	TUBGCP5	VPS4B	http://amigo.geneontology.org/amigo/term/GO:0031122
ADP binding	Gene Ontology	GO:0043531	3	23	0.0486091	0.243138	MYH11	MYH9	PRKAG2	http://amigo.geneontology.org/amigo/term/GO:0043531
dendrite morphogenesis	Gene Ontology	GO:0048813	3	23	0.0486091	0.243138	ABI1	PREX2	FARP1	http://amigo.geneontology.org/amigo/term/GO:0048813
Cajal body	Gene Ontology	GO:0015030	3	23	0.0486091	0.243138	SART3	LSG1	ELL	http://amigo.geneontology.org/amigo/term/GO:0015030
response to calcium ion	Gene Ontology	GO:0051592	3	23	0.0486091	0.243138	ANXA11	FGG	ADAM9	http://amigo.geneontology.org/amigo/term/GO:0051592
cilium	Gene Ontology	GO:0005929	6	77	0.0491303	0.245108	ICK	CLUAP1	IFT57	ARL13B	TTLL9	ANKS3	http://amigo.geneontology.org/amigo/term/GO:0005929
microtubule binding	Gene Ontology	GO:0008017	10	162	0.0491893	0.245108	FSD1	CLASP2	CLASP1	PLK1	CCDC88C	MTUS1	KIF11	CCDC181	CRIPT	MAPRE3	http://amigo.geneontology.org/amigo/term/GO:0008017
actin binding	Gene Ontology	GO:0003779	9	140	0.0493538	0.245463	EPB41L1	MYH11	ACTN4	SPTAN1	PHACTR2	GMFB	MYO18B	KLHL2	GC	http://amigo.geneontology.org/amigo/term/GO:0003779
cell projection	Gene Ontology	GO:0042995	4	40	0.0508188	0.247734	SLC2A14	C1QTNF5	COQ6	SCIN	http://amigo.geneontology.org/amigo/term/GO:0042995
protein domain specific binding	Gene Ontology	GO:0019904	8	120	0.0524444	0.247734	MYH9	VRK2	STAMBP	PRKDC	MED12	WNT5A	CBX3	GUSB	http://amigo.geneontology.org/amigo/term/GO:0019904
lysosome	Gene Ontology	GO:0005764	9	142	0.0528733	0.247734	CTSH	ACP5	SNX14	VPS36	HYAL3	SMPD1	TMEM59	CTSS	GUSB	http://amigo.geneontology.org/amigo/term/GO:0005764
phosphatidylinositol-3,4,5-trisphosphate binding	Gene Ontology	GO:0005547	3	24	0.0534342	0.247734	OGT	COMMD1	ARAP3	http://amigo.geneontology.org/amigo/term/GO:0005547
release of sequestered calcium ion into cytosol	Gene Ontology	GO:0051209	3	24	0.0534342	0.247734	ITPR2	ITPR1	PTPRC	http://amigo.geneontology.org/amigo/term/GO:0051209
tricarboxylic acid cycle	Gene Ontology	GO:0006099	3	24	0.0534342	0.247734	FH	IDH3B	MDH2	http://amigo.geneontology.org/amigo/term/GO:0006099
exogenous drug catabolic process	Gene Ontology	GO:0042738	3	24	0.0534342	0.247734	CYP2AC1	CYP2W1	CYP2U1	http://amigo.geneontology.org/amigo/term/GO:0042738
NAD+ ADP-ribosyltransferase activity	Gene Ontology	GO:0003950	3	24	0.0534342	0.247734	TNKS2	PARP1	MADPRT1	http://amigo.geneontology.org/amigo/term/GO:0003950
dendrite development	Gene Ontology	GO:0016358	3	24	0.0534342	0.247734	BAIAP2	IGSF9	TBC1D24	http://amigo.geneontology.org/amigo/term/GO:0016358
cleavage furrow	Gene Ontology	GO:0032154	3	24	0.0534342	0.247734	RAB11FIP3	MYH9	STAMBP	http://amigo.geneontology.org/amigo/term/GO:0032154
positive regulation of inflammatory response	Gene Ontology	GO:0050729	3	24	0.0534342	0.247734	WNT5A	ABCC1	IL1RL1	http://amigo.geneontology.org/amigo/term/GO:0050729
Golgi to plasma membrane protein transport	Gene Ontology	GO:0043001	3	24	0.0534342	0.247734	GGA3	OPTN	GOLGA4	http://amigo.geneontology.org/amigo/term/GO:0043001
synaptonemal complex	Gene Ontology	GO:0000795	2	10	0.0541418	0.247734	PLK1	WAPL	http://amigo.geneontology.org/amigo/term/GO:0000795
phagocytosis, engulfment	Gene Ontology	GO:0006911	2	10	0.0541418	0.247734	MYH9	BIN2	http://amigo.geneontology.org/amigo/term/GO:0006911
negative regulation of androgen receptor signaling pathway	Gene Ontology	GO:0060766	2	10	0.0541418	0.247734	PHB	SIRT1	http://amigo.geneontology.org/amigo/term/GO:0060766
fatty acid binding	Gene Ontology	GO:0005504	2	10	0.0541418	0.247734	EXFABP	ALB	http://amigo.geneontology.org/amigo/term/GO:0005504
regulation of epithelial to mesenchymal transition	Gene Ontology	GO:0010717	2	10	0.0541418	0.247734	PHLDB1	CLASP1	http://amigo.geneontology.org/amigo/term/GO:0010717
neutrophil activation	Gene Ontology	GO:0042119	2	10	0.0541418	0.247734	KMT2E	IL18RAP	http://amigo.geneontology.org/amigo/term/GO:0042119
negative regulation of oxidative stress-induced neuron death	Gene Ontology	GO:1903204	2	10	0.0541418	0.247734	CTNNB1	TBC1D24	http://amigo.geneontology.org/amigo/term/GO:1903204
response to X-ray	Gene Ontology	GO:0010165	2	10	0.0541418	0.247734	BRCA2	XRCC2	http://amigo.geneontology.org/amigo/term/GO:0010165
positive regulation of stress-activated MAPK cascade	Gene Ontology	GO:0032874	2	10	0.0541418	0.247734	PDCD10	ARL6IP5	http://amigo.geneontology.org/amigo/term/GO:0032874
spinal cord development	Gene Ontology	GO:0021510	2	10	0.0541418	0.247734	DLL1	MED12	http://amigo.geneontology.org/amigo/term/GO:0021510
regulation of G1/S transition of mitotic cell cycle	Gene Ontology	GO:2000045	2	10	0.0541418	0.247734	APPL1	INO80	http://amigo.geneontology.org/amigo/term/GO:2000045
phosphate ion transmembrane transport	Gene Ontology	GO:0035435	2	10	0.0541418	0.247734	SLC25A30	SLC25A10	http://amigo.geneontology.org/amigo/term/GO:0035435
positive regulation of neuron death	Gene Ontology	GO:1901216	2	10	0.0541418	0.247734	EFNB2	WNT5A	http://amigo.geneontology.org/amigo/term/GO:1901216
positive regulation of cell cycle G1/S phase transition	Gene Ontology	GO:1902808	2	10	0.0541418	0.247734	PHB2	EZH2	http://amigo.geneontology.org/amigo/term/GO:1902808
costamere	Gene Ontology	GO:0043034	2	10	0.0541418	0.247734	SPTAN1	SVIL	http://amigo.geneontology.org/amigo/term/GO:0043034
planar cell polarity pathway involved in neural tube closure	Gene Ontology	GO:0090179	2	10	0.0541418	0.247734	VANGL2	WNT5A	http://amigo.geneontology.org/amigo/term/GO:0090179
positive regulation of telomere capping	Gene Ontology	GO:1904355	2	10	0.0541418	0.247734	TNKS2	NABP2	http://amigo.geneontology.org/amigo/term/GO:1904355
isopeptidase activity	Gene Ontology	GO:0070122	2	10	0.0541418	0.247734	STAMBP	COPS5	http://amigo.geneontology.org/amigo/term/GO:0070122
positive regulation by host of viral transcription	Gene Ontology	GO:0043923	2	10	0.0541418	0.247734	ZNF639	NUCKS1	http://amigo.geneontology.org/amigo/term/GO:0043923
positive regulation of exocytosis	Gene Ontology	GO:0045921	2	10	0.0541418	0.247734	FGG	CLASP1	http://amigo.geneontology.org/amigo/term/GO:0045921
regulation of release of sequestered calcium ion into cytosol	Gene Ontology	GO:0051279	2	10	0.0541418	0.247734	LYN	CYBA	http://amigo.geneontology.org/amigo/term/GO:0051279
response to light stimulus	Gene Ontology	GO:0009416	2	10	0.0541418	0.247734	PER2	HSF2	http://amigo.geneontology.org/amigo/term/GO:0009416
apoptotic mitochondrial changes	Gene Ontology	GO:0008637	2	10	0.0541418	0.247734	HK2	BID	http://amigo.geneontology.org/amigo/term/GO:0008637
lymph node development	Gene Ontology	GO:0048535	2	10	0.0541418	0.247734	TGFB1	RC3H2	http://amigo.geneontology.org/amigo/term/GO:0048535
acyl-CoA hydrolase activity	Gene Ontology	GO:0047617	2	10	0.0541418	0.247734	BAAT	ACSBG2	http://amigo.geneontology.org/amigo/term/GO:0047617
STAGA complex	Gene Ontology	GO:0030914	2	10	0.0541418	0.247734	TAF5L	TADA1	http://amigo.geneontology.org/amigo/term/GO:0030914
regulation of Wnt signaling pathway	Gene Ontology	GO:0030111	2	10	0.0541418	0.247734	VANGL2	ITGA3	http://amigo.geneontology.org/amigo/term/GO:0030111
positive regulation of proteasomal protein catabolic process	Gene Ontology	GO:1901800	2	10	0.0541418	0.247734	PSMC1	DAB2IP	http://amigo.geneontology.org/amigo/term/GO:1901800
cullin-RING ubiquitin ligase complex	Gene Ontology	GO:0031461	2	10	0.0541418	0.247734	DDB1	CUL1	http://amigo.geneontology.org/amigo/term/GO:0031461
RNA polymerase II, core complex	Gene Ontology	GO:0005665	2	10	0.0541418	0.247734	POLR2H	POLR2K	http://amigo.geneontology.org/amigo/term/GO:0005665
protein serine/threonine phosphatase activity	Gene Ontology	GO:0004722	4	41	0.0544288	0.248615	PPM1J	MTMR4	PPM1B	PPP4R1	http://amigo.geneontology.org/amigo/term/GO:0004722
cell-cell junction	Gene Ontology	GO:0005911	7	100	0.055052	0.251026	LAMA1	ARVCF	ACTN4	PKP4	LCP2	VANGL2	SH3KBP1	http://amigo.geneontology.org/amigo/term/GO:0005911
inflammatory response	Gene Ontology	GO:0006954	8	122	0.0564605	0.257003	IL18	TGFB1	LIAS	HYAL3	SCYL3	EXFABP	CYBA	C3	http://amigo.geneontology.org/amigo/term/GO:0006954
regulation of cell shape	Gene Ontology	GO:0008360	6	80	0.0566052	0.257217	PLXNB2	FMNL2	SLC9A3R1	MYH9	BAIAP2	SH3KBP1	http://amigo.geneontology.org/amigo/term/GO:0008360
ribosome binding	Gene Ontology	GO:0043022	4	42	0.0581738	0.260339	SRP72	EIF2A	SEC61A2	NAA15	http://amigo.geneontology.org/amigo/term/GO:0043022
chromatin DNA binding	Gene Ontology	GO:0031490	4	42	0.0581738	0.260339	WBP2NL	EZH2	CREBBP	ACTN4	http://amigo.geneontology.org/amigo/term/GO:0031490
positive regulation of nucleic acid-templated transcription	Gene Ontology	GO:1903508	4	42	0.0581738	0.260339	ING4	NUP98	TADA1	ACTN4	http://amigo.geneontology.org/amigo/term/GO:1903508
cellular response to insulin stimulus	Gene Ontology	GO:0032869	4	42	0.0581738	0.260339	PRKDC	LPIN1	KAT2B	PARP1	http://amigo.geneontology.org/amigo/term/GO:0032869
forebrain development	Gene Ontology	GO:0030900	3	25	0.0584798	0.260339	ATRX	SETD2	NR2F2	http://amigo.geneontology.org/amigo/term/GO:0030900
tumor necrosis factor-mediated signaling pathway	Gene Ontology	GO:0033209	3	25	0.0584798	0.260339	FAS	ACTN4	KRT18	http://amigo.geneontology.org/amigo/term/GO:0033209
positive regulation of G1/S transition of mitotic cell cycle	Gene Ontology	GO:1900087	3	25	0.0584798	0.260339	CDC45	PLRG1	KMT2E	http://amigo.geneontology.org/amigo/term/GO:1900087
synapse assembly	Gene Ontology	GO:0007416	3	25	0.0584798	0.260339	CLSTN3	PDCD2	FARP1	http://amigo.geneontology.org/amigo/term/GO:0007416
positive regulation of protein secretion	Gene Ontology	GO:0050714	3	25	0.0584798	0.260339	MYOM1	FGG	ADAM9	http://amigo.geneontology.org/amigo/term/GO:0050714
regulation of neurogenesis	Gene Ontology	GO:0050767	3	25	0.0584798	0.260339	DLL4	CHD7	PRUNE1	http://amigo.geneontology.org/amigo/term/GO:0050767
guanyl-nucleotide exchange factor activity	Gene Ontology	GO:0005085	5	61	0.0590609	0.262482	CCDC88C	RALGPS1	EIF2B2	MCF2L	MYCBP2	http://amigo.geneontology.org/amigo/term/GO:0005085
early endosome	Gene Ontology	GO:0005769	9	146	0.0603942	0.263804	STX8	ADRB1	HYAL3	PHB	NIPA1	COMMD1	APPL1	PPP1R21	TGFBRAP1	http://amigo.geneontology.org/amigo/term/GO:0005769
basolateral plasma membrane	Gene Ontology	GO:0016323	6	82	0.0619477	0.263804	CNNM4	ITGA3	CTNNB1	VANGL2	IDE	ABCC1	http://amigo.geneontology.org/amigo/term/GO:0016323
cellular response to hypoxia	Gene Ontology	GO:0071456	4	43	0.062053	0.263804	EPAS1	PPARD	NPEPPS	SIRT1	http://amigo.geneontology.org/amigo/term/GO:0071456
DNA-binding transcription factor activity	Gene Ontology	GO:0003700	12	216	0.0621105	0.263804	E2F7	ZNF639	HSF2	HNF4beta	ZHX3	ZNF236	NR2F2	CTNNB1	ASCL3	WNT5A	MAFF	ATF2	http://amigo.geneontology.org/amigo/term/GO:0003700
negative regulation of cell migration	Gene Ontology	GO:0030336	5	62	0.0622304	0.263804	RECK	PODN	SLC9A3R1	SULF1	ADARB1	http://amigo.geneontology.org/amigo/term/GO:0030336
Notch signaling pathway	Gene Ontology	GO:0007219	5	62	0.0622304	0.263804	TGFB1	DLL1	HHEX	DLL4	SORBS2	http://amigo.geneontology.org/amigo/term/GO:0007219
cell surface	Gene Ontology	GO:0009986	14	264	0.0625818	0.263804	ITGB2	EPHB6	ANTXR2	PHB2	PHB	PDIA3	SULF1	TNFRSF10B	RC3H2	C3	TREM-B1	WNT5A	CLSTN3	RGMA	http://amigo.geneontology.org/amigo/term/GO:0009986
NADPH binding	Gene Ontology	GO:0070402	2	11	0.0626673	0.263804	DECR1	DUS2	http://amigo.geneontology.org/amigo/term/GO:0070402
response to unfolded protein	Gene Ontology	GO:0006986	2	11	0.0626673	0.263804	CREBRF	HSPA9	http://amigo.geneontology.org/amigo/term/GO:0006986
phosphatidic acid binding	Gene Ontology	GO:0070300	2	11	0.0626673	0.263804	SESTD1	COMMD1	http://amigo.geneontology.org/amigo/term/GO:0070300
embryonic brain development	Gene Ontology	GO:1990403	2	11	0.0626673	0.263804	CTNNB1	MED12	http://amigo.geneontology.org/amigo/term/GO:1990403
protein phosphatase inhibitor activity	Gene Ontology	GO:0004864	2	11	0.0626673	0.263804	PPP1R2	PHACTR2	http://amigo.geneontology.org/amigo/term/GO:0004864
hematopoietic stem cell proliferation	Gene Ontology	GO:0071425	2	11	0.0626673	0.263804	SART3	WNT5A	http://amigo.geneontology.org/amigo/term/GO:0071425
negative regulation of cellular senescence	Gene Ontology	GO:2000773	2	11	0.0626673	0.263804	SIRT1	RBL1	http://amigo.geneontology.org/amigo/term/GO:2000773
regulation of protein localization to plasma membrane	Gene Ontology	GO:1903076	2	11	0.0626673	0.263804	STX8	APPL1	http://amigo.geneontology.org/amigo/term/GO:1903076
pseudouridine synthase activity	Gene Ontology	GO:0009982	2	11	0.0626673	0.263804	TRUB1	PUSL1	http://amigo.geneontology.org/amigo/term/GO:0009982
regulation of nucleic acid-templated transcription	Gene Ontology	GO:1903506	2	11	0.0626673	0.263804	NMI	ACTN4	http://amigo.geneontology.org/amigo/term/GO:1903506
acrosomal membrane	Gene Ontology	GO:0002080	2	11	0.0626673	0.263804	HYAL3	SLC2A14	http://amigo.geneontology.org/amigo/term/GO:0002080
positive regulation of cholesterol efflux	Gene Ontology	GO:0010875	2	11	0.0626673	0.263804	SIRT1	NR1H3	http://amigo.geneontology.org/amigo/term/GO:0010875
alternative mRNA splicing, via spliceosome	Gene Ontology	GO:0000380	2	11	0.0626673	0.263804	SFPQ	PUF60	http://amigo.geneontology.org/amigo/term/GO:0000380
protein ADP-ribosylase activity	Gene Ontology	GO:1990404	2	11	0.0626673	0.263804	TNKS2	PARP1	http://amigo.geneontology.org/amigo/term/GO:1990404
negative regulation of epithelial cell migration	Gene Ontology	GO:0010633	2	11	0.0626673	0.263804	CORO1C	STRAP	http://amigo.geneontology.org/amigo/term/GO:0010633
plasma membrane tubulation	Gene Ontology	GO:0097320	2	11	0.0626673	0.263804	PACSIN3	BIN2	http://amigo.geneontology.org/amigo/term/GO:0097320
negative regulation of telomere maintenance via telomerase	Gene Ontology	GO:0032211	2	11	0.0626673	0.263804	POT1	NAT10	http://amigo.geneontology.org/amigo/term/GO:0032211
mRNA destabilization	Gene Ontology	GO:0061157	2	11	0.0626673	0.263804	METTL16	FTO	http://amigo.geneontology.org/amigo/term/GO:0061157
monocyte differentiation	Gene Ontology	GO:0030224	2	11	0.0626673	0.263804	MYH9	THOC5	http://amigo.geneontology.org/amigo/term/GO:0030224
protein catabolic process	Gene Ontology	GO:0030163	2	11	0.0626673	0.263804	PSMC1	LRSAM1	http://amigo.geneontology.org/amigo/term/GO:0030163
M band	Gene Ontology	GO:0031430	2	11	0.0626673	0.263804	MYOM1	SMTNL2	http://amigo.geneontology.org/amigo/term/GO:0031430
negative regulation of transcription elongation from RNA polymerase II promoter	Gene Ontology	GO:0034244	2	11	0.0626673	0.263804	EZH2	UBXN7	http://amigo.geneontology.org/amigo/term/GO:0034244
cellular response to unfolded protein	Gene Ontology	GO:0034620	2	11	0.0626673	0.263804	HSPA9	OPTN	http://amigo.geneontology.org/amigo/term/GO:0034620
left/right axis specification	Gene Ontology	GO:0070986	2	11	0.0626673	0.263804	DLL1	ARL13B	http://amigo.geneontology.org/amigo/term/GO:0070986
RNA polymerase I complex	Gene Ontology	GO:0005736	2	11	0.0626673	0.263804	POLR2H	POLR2K	http://amigo.geneontology.org/amigo/term/GO:0005736
positive regulation of fibroblast proliferation	Gene Ontology	GO:0048146	3	26	0.0637408	0.265772	TGFB1	WNT5A	WAPL	http://amigo.geneontology.org/amigo/term/GO:0048146
negative regulation of cell death	Gene Ontology	GO:0060548	3	26	0.0637408	0.265772	RAD18	DUS2	VPS4B	http://amigo.geneontology.org/amigo/term/GO:0060548
chromosome, telomeric region	Gene Ontology	GO:0000781	3	26	0.0637408	0.265772	EZH2	POT1	SMC6	http://amigo.geneontology.org/amigo/term/GO:0000781
regulation of phosphoprotein phosphatase activity	Gene Ontology	GO:0043666	3	26	0.0637408	0.265772	PPP4R1	HSP90B1	PPP1R2	http://amigo.geneontology.org/amigo/term/GO:0043666
cell fate specification	Gene Ontology	GO:0001708	3	26	0.0637408	0.265772	TBX21	CTNNB1	MGA	http://amigo.geneontology.org/amigo/term/GO:0001708
heme binding	Gene Ontology	GO:0020037	7	104	0.0645095	0.268127	TDO2	CYP2AC1	CYP4B7	CAT	CYBA	CYP2W1	CYP2U1	http://amigo.geneontology.org/amigo/term/GO:0020037
lamellipodium	Gene Ontology	GO:0030027	7	104	0.0645095	0.268127	PTPN13	ARPC2	ABI1	APBB1	SCYL3	CTNNB1	CORO1C	http://amigo.geneontology.org/amigo/term/GO:0030027
neuron projection development	Gene Ontology	GO:0031175	5	63	0.0654941	0.27179	LYN	PPP1R9B	STMN1	RB1	RGMA	http://amigo.geneontology.org/amigo/term/GO:0031175
stress fiber	Gene Ontology	GO:0001725	4	44	0.066065	0.273728	VANGL2	MYH9	MST1R	ACTN4	http://amigo.geneontology.org/amigo/term/GO:0001725
mitotic cell cycle	Gene Ontology	GO:0000278	5	64	0.0688518	0.281621	PLK1	CLTCL1	XRCC2	WAPL	TUBGCP5	http://amigo.geneontology.org/amigo/term/GO:0000278
skin development	Gene Ontology	GO:0043588	3	27	0.0692121	0.281621	CTNNB1	SLC27A4	ITGA3	http://amigo.geneontology.org/amigo/term/GO:0043588
acrosomal vesicle	Gene Ontology	GO:0001669	3	27	0.0692121	0.281621	CRCP	SCNN1A	ATP6V0A2	http://amigo.geneontology.org/amigo/term/GO:0001669
protein targeting to membrane	Gene Ontology	GO:0006612	3	27	0.0692121	0.281621	VPS37C	ZDHHC18	VPS37A	http://amigo.geneontology.org/amigo/term/GO:0006612
cellular response to hydrogen peroxide	Gene Ontology	GO:0070301	3	27	0.0692121	0.281621	SIRT1	EZH2	SETX	http://amigo.geneontology.org/amigo/term/GO:0070301
protein polyubiquitination	Gene Ontology	GO:0000209	7	106	0.069585	0.281621	WWP2	LRSAM1	UBE2D1	CTNNB1	RC3H2	TRIP12	TNKS2	http://amigo.geneontology.org/amigo/term/GO:0000209
mitochondrial large ribosomal subunit	Gene Ontology	GO:0005762	4	45	0.0702086	0.281621	MRPL18	MRPL10	MRPL37	MRPL39	http://amigo.geneontology.org/amigo/term/GO:0005762
cellular response to leukemia inhibitory factor	Gene Ontology	GO:1990830	6	85	0.0705014	0.281621	SIRT1	RPS16	HK2	MRAS	PDCD10	SMARCA5	http://amigo.geneontology.org/amigo/term/GO:1990830
protein homotrimerization	Gene Ontology	GO:0070207	2	12	0.0716095	0.281621	PNPT1	HSF2	http://amigo.geneontology.org/amigo/term/GO:0070207
response to tumor necrosis factor	Gene Ontology	GO:0034612	2	12	0.0716095	0.281621	MAP4K3	ADAM9	http://amigo.geneontology.org/amigo/term/GO:0034612
secretory granule membrane	Gene Ontology	GO:0030667	2	12	0.0716095	0.281621	ITPR2	ITPR1	http://amigo.geneontology.org/amigo/term/GO:0030667
ESC/E(Z) complex	Gene Ontology	GO:0035098	2	12	0.0716095	0.281621	SIRT1	EZH2	http://amigo.geneontology.org/amigo/term/GO:0035098
regulation of cytoskeleton organization	Gene Ontology	GO:0051493	2	12	0.0716095	0.281621	STMN1	MYCBP2	http://amigo.geneontology.org/amigo/term/GO:0051493
ARF guanyl-nucleotide exchange factor activity	Gene Ontology	GO:0005086	2	12	0.0716095	0.281621	CYTH1	SEC61B	http://amigo.geneontology.org/amigo/term/GO:0005086
oxidoreductase activity, acting on paired donors, with incorporation or reduction of molecular oxygen, NAD(P)H as one donor, and incorporation of one atom of oxygen	Gene Ontology	GO:0016709	2	12	0.0716095	0.281621	NDOR1	COQ6	http://amigo.geneontology.org/amigo/term/GO:0016709
maturation of SSU-rRNA	Gene Ontology	GO:0030490	2	12	0.0716095	0.281621	TSR3	NOL11	http://amigo.geneontology.org/amigo/term/GO:0030490
PRC1 complex	Gene Ontology	GO:0035102	2	12	0.0716095	0.281621	PHC1	PHC3	http://amigo.geneontology.org/amigo/term/GO:0035102
peptide catabolic process	Gene Ontology	GO:0043171	2	12	0.0716095	0.281621	IDE	NPEPPS	http://amigo.geneontology.org/amigo/term/GO:0043171
epithelial tube branching involved in lung morphogenesis	Gene Ontology	GO:0060441	2	12	0.0716095	0.281621	CTNNB1	LAMA1	http://amigo.geneontology.org/amigo/term/GO:0060441
ribosomal small subunit binding	Gene Ontology	GO:0043024	2	12	0.0716095	0.281621	LARP1	UNG	http://amigo.geneontology.org/amigo/term/GO:0043024
positive regulation of cellular protein catabolic process	Gene Ontology	GO:1903364	2	12	0.0716095	0.281621	AMER1	FBXL5	http://amigo.geneontology.org/amigo/term/GO:1903364
ventricular trabecula myocardium morphogenesis	Gene Ontology	GO:0003222	2	12	0.0716095	0.281621	DLL4	CHD7	http://amigo.geneontology.org/amigo/term/GO:0003222
signal transduction by protein phosphorylation	Gene Ontology	GO:0023014	2	12	0.0716095	0.281621	STK4	MAP4K4	http://amigo.geneontology.org/amigo/term/GO:0023014
myofibril assembly	Gene Ontology	GO:0030239	2	12	0.0716095	0.281621	MYH11	FLII	http://amigo.geneontology.org/amigo/term/GO:0030239
negative regulation of endothelial cell migration	Gene Ontology	GO:0010596	2	12	0.0716095	0.281621	DAB2IP	NR2F2	http://amigo.geneontology.org/amigo/term/GO:0010596
mRNA splice site selection	Gene Ontology	GO:0006376	2	12	0.0716095	0.281621	PUF60	SETX	http://amigo.geneontology.org/amigo/term/GO:0006376
DNA damage response, signal transduction by p53 class mediator	Gene Ontology	GO:0030330	2	12	0.0716095	0.281621	E2F7	ATRX	http://amigo.geneontology.org/amigo/term/GO:0030330
neuron projection extension	Gene Ontology	GO:1990138	2	12	0.0716095	0.281621	CTNNB1	ALCAM	http://amigo.geneontology.org/amigo/term/GO:1990138
long-chain fatty acid-CoA ligase activity	Gene Ontology	GO:0004467	2	12	0.0716095	0.281621	SLC27A4	ACSBG2	http://amigo.geneontology.org/amigo/term/GO:0004467
endosome transport via multivesicular body sorting pathway	Gene Ontology	GO:0032509	2	12	0.0716095	0.281621	VPS37C	VPS37A	http://amigo.geneontology.org/amigo/term/GO:0032509
regulation of centrosome duplication	Gene Ontology	GO:0010824	2	12	0.0716095	0.281621	XRCC3	NPM1	http://amigo.geneontology.org/amigo/term/GO:0010824
complement activation	Gene Ontology	GO:0006956	2	12	0.0716095	0.281621	C3	C4	http://amigo.geneontology.org/amigo/term/GO:0006956
dynein heavy chain binding	Gene Ontology	GO:0045504	2	12	0.0716095	0.281621	DYNC1I2	DYNC1LI2	http://amigo.geneontology.org/amigo/term/GO:0045504
recycling endosome	Gene Ontology	GO:0055037	5	65	0.072303	0.283501	COMMD1	STX8	OPTN	RAB11B	SLC9A9	http://amigo.geneontology.org/amigo/term/GO:0055037
response to drug	Gene Ontology	GO:0042493	5	65	0.072303	0.283501	CTNNB1	SRP72	SRP54	EXFABP	ABCC1	http://amigo.geneontology.org/amigo/term/GO:0042493
mitochondrion organization	Gene Ontology	GO:0007005	4	46	0.0744823	0.291611	PHB2	PHB	EPAS1	ADCK1	http://amigo.geneontology.org/amigo/term/GO:0007005
translational initiation	Gene Ontology	GO:0006413	3	28	0.0748878	0.292764	LARP1	EIF2B2	EIF2A	http://amigo.geneontology.org/amigo/term/GO:0006413
SCF ubiquitin ligase complex	Gene Ontology	GO:0019005	4	47	0.0788844	0.297812	FBXL5	FBXL20	FBXO31	CUL1	http://amigo.geneontology.org/amigo/term/GO:0019005
regulation of transcription, DNA-templated	Gene Ontology	GO:0006355	12	226	0.0797515	0.297812	TAF5L	NUP133	TLE3	ZNF236	APBB1	TGFBRAP1	SFPQ	BRCA2	TCEA3	NLK	SETD2	RALGAPA1	http://amigo.geneontology.org/amigo/term/GO:0006355
keratinocyte differentiation	Gene Ontology	GO:0030216	3	29	0.0807623	0.297812	WNT5A	STK4	ADAM9	http://amigo.geneontology.org/amigo/term/GO:0030216
steroid hydroxylase activity	Gene Ontology	GO:0008395	3	29	0.0807623	0.297812	CYP2AC1	CYP2W1	CYP2U1	http://amigo.geneontology.org/amigo/term/GO:0008395
Cul3-RING ubiquitin ligase complex	Gene Ontology	GO:0031463	3	29	0.0807623	0.297812	KCTD17	KLHL2	TNFAIP1	http://amigo.geneontology.org/amigo/term/GO:0031463
lateral plasma membrane	Gene Ontology	GO:0016328	3	29	0.0807623	0.297812	CTNNB1	CORO1C	VANGL2	http://amigo.geneontology.org/amigo/term/GO:0016328
Rho protein signal transduction	Gene Ontology	GO:0007266	3	29	0.0807623	0.297812	ARHGEF11	VANGL2	CTNNAL1	http://amigo.geneontology.org/amigo/term/GO:0007266
regulation of mitotic cell cycle	Gene Ontology	GO:0007346	3	29	0.0807623	0.297812	SIRT1	RBL1	RB1	http://amigo.geneontology.org/amigo/term/GO:0007346
drug binding	Gene Ontology	GO:0008144	3	29	0.0807623	0.297812	PPARD	SRP54	ALB	http://amigo.geneontology.org/amigo/term/GO:0008144
negative regulation of nucleic acid-templated transcription	Gene Ontology	GO:1903507	3	29	0.0807623	0.297812	TLE3	BEND6	HSBP1L1	http://amigo.geneontology.org/amigo/term/GO:1903507
skeletal muscle tissue development	Gene Ontology	GO:0007519	3	29	0.0807623	0.297812	METTL8	SVIL	NR2F2	http://amigo.geneontology.org/amigo/term/GO:0007519
platelet formation	Gene Ontology	GO:0030220	2	13	0.0809335	0.297812	PTPN11	MYH9	http://amigo.geneontology.org/amigo/term/GO:0030220
telomere maintenance via telomerase	Gene Ontology	GO:0007004	2	13	0.0809335	0.297812	NHP2	POT1	http://amigo.geneontology.org/amigo/term/GO:0007004
Cul2-RING ubiquitin ligase complex	Gene Ontology	GO:0031462	2	13	0.0809335	0.297812	COMMD1	ZSWIM8	http://amigo.geneontology.org/amigo/term/GO:0031462
negative regulation of mRNA splicing, via spliceosome	Gene Ontology	GO:0048025	2	13	0.0809335	0.297812	PTBP1	HNRNPA2B1	http://amigo.geneontology.org/amigo/term/GO:0048025
regulation of cellular protein localization	Gene Ontology	GO:1903827	2	13	0.0809335	0.297812	WNT5A	PARP1	http://amigo.geneontology.org/amigo/term/GO:1903827
histone H4-K5 acetylation	Gene Ontology	GO:0043981	2	13	0.0809335	0.297812	ING4	OGT	http://amigo.geneontology.org/amigo/term/GO:0043981
ankyrin binding	Gene Ontology	GO:0030506	2	13	0.0809335	0.297812	RHAG	PTPRC	http://amigo.geneontology.org/amigo/term/GO:0030506
FMN binding	Gene Ontology	GO:0010181	2	13	0.0809335	0.297812	NDOR1	DUS2	http://amigo.geneontology.org/amigo/term/GO:0010181
very long-chain fatty acid biosynthetic process	Gene Ontology	GO:0042761	2	13	0.0809335	0.297812	HACD2	ELOVL1	http://amigo.geneontology.org/amigo/term/GO:0042761
gastrulation with mouth forming second	Gene Ontology	GO:0001702	2	13	0.0809335	0.297812	CTNNB1	ZBTB17	http://amigo.geneontology.org/amigo/term/GO:0001702
oligodendrocyte development	Gene Ontology	GO:0014003	2	13	0.0809335	0.297812	TGFB1	MED12	http://amigo.geneontology.org/amigo/term/GO:0014003
activation of innate immune response	Gene Ontology	GO:0002218	2	13	0.0809335	0.297812	SFPQ	PRKDC	http://amigo.geneontology.org/amigo/term/GO:0002218
histone H4-K8 acetylation	Gene Ontology	GO:0043982	2	13	0.0809335	0.297812	ING4	OGT	http://amigo.geneontology.org/amigo/term/GO:0043982
nBAF complex	Gene Ontology	GO:0071565	2	13	0.0809335	0.297812	SMARCC2	ARID1B	http://amigo.geneontology.org/amigo/term/GO:0071565
B cell homeostasis	Gene Ontology	GO:0001782	2	13	0.0809335	0.297812	LYN	RC3H2	http://amigo.geneontology.org/amigo/term/GO:0001782
vascular endothelial growth factor receptor signaling pathway	Gene Ontology	GO:0048010	2	13	0.0809335	0.297812	VEGFA	SULF1	http://amigo.geneontology.org/amigo/term/GO:0048010
transcription coactivator binding	Gene Ontology	GO:0001223	2	13	0.0809335	0.297812	PPARD	ZBTB17	http://amigo.geneontology.org/amigo/term/GO:0001223
regulated exocytosis	Gene Ontology	GO:0045055	2	13	0.0809335	0.297812	MYH9	RAB11B	http://amigo.geneontology.org/amigo/term/GO:0045055
DNA-dependent DNA replication	Gene Ontology	GO:0006261	2	13	0.0809335	0.297812	RFC4	POLE2	http://amigo.geneontology.org/amigo/term/GO:0006261
posttranscriptional regulation of gene expression	Gene Ontology	GO:0010608	2	13	0.0809335	0.297812	RC3H2	METTL16	http://amigo.geneontology.org/amigo/term/GO:0010608
DNA methylation	Gene Ontology	GO:0006306	2	13	0.0809335	0.297812	EZH2	KMT2E	http://amigo.geneontology.org/amigo/term/GO:0006306
establishment of planar polarity	Gene Ontology	GO:0001736	2	13	0.0809335	0.297812	VANGL2	WNT5A	http://amigo.geneontology.org/amigo/term/GO:0001736
ubiquinone biosynthetic process	Gene Ontology	GO:0006744	2	13	0.0809335	0.297812	FDXR	COQ6	http://amigo.geneontology.org/amigo/term/GO:0006744
5'-nucleotidase activity	Gene Ontology	GO:0008253	2	13	0.0809335	0.297812	NT5DC4	NT5C3B	http://amigo.geneontology.org/amigo/term/GO:0008253
positive regulation of ubiquitin-protein transferase activity	Gene Ontology	GO:0051443	2	13	0.0809335	0.297812	DCUN1D2	RPS2	http://amigo.geneontology.org/amigo/term/GO:0051443
aortic valve morphogenesis	Gene Ontology	GO:0003180	2	13	0.0809335	0.297812	TGFB1	RB1	http://amigo.geneontology.org/amigo/term/GO:0003180
glucose transmembrane transport	Gene Ontology	GO:1904659	2	13	0.0809335	0.297812	SLC5A10	SLC2A14	http://amigo.geneontology.org/amigo/term/GO:1904659
acyl-CoA metabolic process	Gene Ontology	GO:0006637	2	13	0.0809335	0.297812	BAAT	OXSM	http://amigo.geneontology.org/amigo/term/GO:0006637
ion channel binding	Gene Ontology	GO:0044325	5	68	0.0832118	0.305229	CTNNB1	ITPR2	LYN	HERPUD1	ACTN4	http://amigo.geneontology.org/amigo/term/GO:0044325
positive regulation of protein catabolic process	Gene Ontology	GO:0045732	4	48	0.083413	0.305229	WNT5A	DDB1	WWP2	GGA3	http://amigo.geneontology.org/amigo/term/GO:0045732
circadian regulation of gene expression	Gene Ontology	GO:0032922	4	48	0.083413	0.305229	PER2	SIRT1	MYCBP2	OGT	http://amigo.geneontology.org/amigo/term/GO:0032922
PDZ domain binding	Gene Ontology	GO:0030165	4	48	0.083413	0.305229	ADRB1	SLC9A3R1	CCDC88C	CRIPT	http://amigo.geneontology.org/amigo/term/GO:0030165
cellular response to UV	Gene Ontology	GO:0034644	3	30	0.0868292	0.315536	N4BP1	PARP1	CREBBP	http://amigo.geneontology.org/amigo/term/GO:0034644
amyloid-beta binding	Gene Ontology	GO:0001540	3	30	0.0868292	0.315536	ITGB2	APBB1	APBA3	http://amigo.geneontology.org/amigo/term/GO:0001540
motor activity	Gene Ontology	GO:0003774	3	30	0.0868292	0.315536	MYH11	MYO18B	MYH15	http://amigo.geneontology.org/amigo/term/GO:0003774
melanosome	Gene Ontology	GO:0042470	3	30	0.0868292	0.315536	PDIA3	HSP90B1	SYTL2	http://amigo.geneontology.org/amigo/term/GO:0042470
ubiquitin-dependent ERAD pathway	Gene Ontology	GO:0030433	4	49	0.0880663	0.31959	SEL1L	SEC61B	HSP90B1	DNAJB14	http://amigo.geneontology.org/amigo/term/GO:0030433
regulation of heart rate	Gene Ontology	GO:0002027	2	14	0.0906058	0.319978	EPAS1	TNNI3K	http://amigo.geneontology.org/amigo/term/GO:0002027
cochlea morphogenesis	Gene Ontology	GO:0090103	2	14	0.0906058	0.319978	VANGL2	WNT5A	http://amigo.geneontology.org/amigo/term/GO:0090103
DNA-templated transcription, initiation	Gene Ontology	GO:0006352	2	14	0.0906058	0.319978	SMARCA5	RSF1	http://amigo.geneontology.org/amigo/term/GO:0006352
protein O-linked glycosylation	Gene Ontology	GO:0006493	2	14	0.0906058	0.319978	OGT	B3GALNT2	http://amigo.geneontology.org/amigo/term/GO:0006493
negative regulation of protein secretion	Gene Ontology	GO:0050709	2	14	0.0906058	0.319978	RHBDF1	RHBDF2	http://amigo.geneontology.org/amigo/term/GO:0050709
ribosomal small subunit assembly	Gene Ontology	GO:0000028	2	14	0.0906058	0.319978	RPS15	RPS14	http://amigo.geneontology.org/amigo/term/GO:0000028
transferase activity	Gene Ontology	GO:0016740	2	14	0.0906058	0.319978	TSR3	ATF2	http://amigo.geneontology.org/amigo/term/GO:0016740
Fanconi anaemia nuclear complex	Gene Ontology	GO:0043240	2	14	0.0906058	0.319978	FANCB	FANCA	http://amigo.geneontology.org/amigo/term/GO:0043240
plasma membrane raft	Gene Ontology	GO:0044853	2	14	0.0906058	0.319978	LCP2	ITGB2	http://amigo.geneontology.org/amigo/term/GO:0044853
regulation of embryonic development	Gene Ontology	GO:0045995	2	14	0.0906058	0.319978	LAMA1	TRIP12	http://amigo.geneontology.org/amigo/term/GO:0045995
3'-5' DNA helicase activity	Gene Ontology	GO:0043138	2	14	0.0906058	0.319978	INO80	MCM2	http://amigo.geneontology.org/amigo/term/GO:0043138
microtubule plus-end binding	Gene Ontology	GO:0051010	2	14	0.0906058	0.319978	MAPRE3	CLASP1	http://amigo.geneontology.org/amigo/term/GO:0051010
integrin complex	Gene Ontology	GO:0008305	2	14	0.0906058	0.319978	ITGB2	ITGA7	http://amigo.geneontology.org/amigo/term/GO:0008305
Rac guanyl-nucleotide exchange factor activity	Gene Ontology	GO:0030676	2	14	0.0906058	0.319978	PREX2	FARP1	http://amigo.geneontology.org/amigo/term/GO:0030676
long-chain fatty acid metabolic process	Gene Ontology	GO:0001676	2	14	0.0906058	0.319978	SLC27A4	ACSBG2	http://amigo.geneontology.org/amigo/term/GO:0001676
antiporter activity	Gene Ontology	GO:0015297	2	14	0.0906058	0.319978	SLC25A30	SLC25A10	http://amigo.geneontology.org/amigo/term/GO:0015297
negative regulation of fibroblast growth factor receptor signaling pathway	Gene Ontology	GO:0040037	2	14	0.0906058	0.319978	WNT5A	SULF1	http://amigo.geneontology.org/amigo/term/GO:0040037
heterochromatin	Gene Ontology	GO:0000792	2	14	0.0906058	0.319978	SMARCAD1	NPTXR	http://amigo.geneontology.org/amigo/term/GO:0000792
negative regulation of cell cycle	Gene Ontology	GO:0045786	2	14	0.0906058	0.319978	TAF6	THAP5	http://amigo.geneontology.org/amigo/term/GO:0045786
RNA polymerase II cis-regulatory region sequence-specific DNA binding	Gene Ontology	GO:0000978	19	409	0.0927466	0.326561	E2F7	ZBED1	ZNF639	CHD2	ZBTB17	CHD7	EPAS1	HESX1	FUBP3	SIRT1	HSF2	HBP1	PPARD	EZH2	TCF7	CEBPZ	NR1H3	MAFF	MED12	http://amigo.geneontology.org/amigo/term/GO:0000978
positive regulation of DNA-binding transcription factor activity	Gene Ontology	GO:0051091	4	50	0.0928422	0.326561	CTNNB1	PHB2	ATF2	COPS5	http://amigo.geneontology.org/amigo/term/GO:0051091
bone development	Gene Ontology	GO:0060348	3	31	0.0930824	0.326969	AMER1	TRIM45	SULF1	http://amigo.geneontology.org/amigo/term/GO:0060348
DNA-binding transcription repressor activity, RNA polymerase II-specific	Gene Ontology	GO:0001227	9	161	0.0944543	0.331346	E2F7	TCF7	HHEX	TBX21	ASCL3	HBP1	HESX1	PPARD	SATB1	http://amigo.geneontology.org/amigo/term/GO:0001227
postsynaptic density	Gene Ontology	GO:0014069	7	115	0.0952849	0.333814	ITPR1	RPS14	RPLP0	DISC1	PKP4	RPL12	PPP1R9B	http://amigo.geneontology.org/amigo/term/GO:0014069
positive regulation of phosphatidylinositol 3-kinase signaling	Gene Ontology	GO:0014068	4	51	0.0977383	0.339314	IL18	PPARD	SIRT1	CAT	http://amigo.geneontology.org/amigo/term/GO:0014068
fat cell differentiation	Gene Ontology	GO:0045444	4	51	0.0977383	0.339314	FAM120B	METTL8	RNASEL	ATF2	http://amigo.geneontology.org/amigo/term/GO:0045444
ruffle	Gene Ontology	GO:0001726	4	51	0.0977383	0.339314	COBL	APPL1	SLC9A3R1	MYH9	http://amigo.geneontology.org/amigo/term/GO:0001726
positive regulation of NIK/NF-kappaB signaling	Gene Ontology	GO:1901224	3	32	0.0995152	0.339314	RC3H2	IL18R1	ACTN4	http://amigo.geneontology.org/amigo/term/GO:1901224
4 iron, 4 sulfur cluster binding	Gene Ontology	GO:0051539	3	32	0.0995152	0.339314	NUBP2	LIAS	NUBPL	http://amigo.geneontology.org/amigo/term/GO:0051539
positive regulation of MAP kinase activity	Gene Ontology	GO:0043406	3	32	0.0995152	0.339314	PDCD10	EZH2	MST1R	http://amigo.geneontology.org/amigo/term/GO:0043406
positive regulation of GTPase activity	Gene Ontology	GO:0043547	10	187	0.0998789	0.339314	PREX2	DAB2IP	PKP4	ADRB1	EZH2	DENND1B	SIPA1L1	ARAP3	RALGAPA1	RGMA	http://amigo.geneontology.org/amigo/term/GO:0043547
DNA biosynthetic process	Gene Ontology	GO:0071897	2	15	0.100595	0.339314	PHB	LIG3	http://amigo.geneontology.org/amigo/term/GO:0071897
activation of JUN kinase activity	Gene Ontology	GO:0007257	2	15	0.100595	0.339314	WNT5A	DAB2IP	http://amigo.geneontology.org/amigo/term/GO:0007257
sphingolipid biosynthetic process	Gene Ontology	GO:0030148	2	15	0.100595	0.339314	HACD2	ELOVL1	http://amigo.geneontology.org/amigo/term/GO:0030148
negative regulation of neuron death	Gene Ontology	GO:1901215	2	15	0.100595	0.339314	PSMC1	SIRT1	http://amigo.geneontology.org/amigo/term/GO:1901215
cellular glucose homeostasis	Gene Ontology	GO:0001678	2	15	0.100595	0.339314	HK2	SIRT1	http://amigo.geneontology.org/amigo/term/GO:0001678
regulation of cell differentiation	Gene Ontology	GO:0045595	2	15	0.100595	0.339314	PTBP1	PLEKHB2	http://amigo.geneontology.org/amigo/term/GO:0045595
protein localization to Golgi apparatus	Gene Ontology	GO:0034067	2	15	0.100595	0.339314	PAQR3	OPTN	http://amigo.geneontology.org/amigo/term/GO:0034067
transcription elongation factor complex	Gene Ontology	GO:0008023	2	15	0.100595	0.339314	AFF1	ELL	http://amigo.geneontology.org/amigo/term/GO:0008023
cortical cytoskeleton	Gene Ontology	GO:0030863	2	15	0.100595	0.339314	CAPZA2	ACTN4	http://amigo.geneontology.org/amigo/term/GO:0030863
disordered domain specific binding	Gene Ontology	GO:0097718	2	15	0.100595	0.339314	CTNNB1	RB1	http://amigo.geneontology.org/amigo/term/GO:0097718
cellular response to vascular endothelial growth factor stimulus	Gene Ontology	GO:0035924	2	15	0.100595	0.339314	DAB2IP	DLL4	http://amigo.geneontology.org/amigo/term/GO:0035924
SWI/SNF complex	Gene Ontology	GO:0016514	2	15	0.100595	0.339314	SMARCC2	ARID1B	http://amigo.geneontology.org/amigo/term/GO:0016514
platelet aggregation	Gene Ontology	GO:0070527	2	15	0.100595	0.339314	FGG	PLEK	http://amigo.geneontology.org/amigo/term/GO:0070527
positive regulation of mesenchymal cell proliferation	Gene Ontology	GO:0002053	2	15	0.100595	0.339314	CTNNB1	WNT5A	http://amigo.geneontology.org/amigo/term/GO:0002053
T cell costimulation	Gene Ontology	GO:0031295	2	15	0.100595	0.339314	EFNB2	CD5	http://amigo.geneontology.org/amigo/term/GO:0031295
NAD+ kinase activity	Gene Ontology	GO:0003951	2	15	0.100595	0.339314	NADK	DGKE	http://amigo.geneontology.org/amigo/term/GO:0003951
extrinsic apoptotic signaling pathway via death domain receptors	Gene Ontology	GO:0008625	2	15	0.100595	0.339314	DAB2IP	DEDD	http://amigo.geneontology.org/amigo/term/GO:0008625
transcriptionally active chromatin	Gene Ontology	GO:0035327	2	15	0.100595	0.339314	KMT2E	ELL	http://amigo.geneontology.org/amigo/term/GO:0035327
single-stranded DNA helicase activity	Gene Ontology	GO:0017116	2	15	0.100595	0.339314	RFC4	MCM2	http://amigo.geneontology.org/amigo/term/GO:0017116
integrator complex	Gene Ontology	GO:0032039	2	15	0.100595	0.339314	INTS3	INTS6	http://amigo.geneontology.org/amigo/term/GO:0032039
neuroblast proliferation	Gene Ontology	GO:0007405	2	15	0.100595	0.339314	DAGLA	PLXNB2	http://amigo.geneontology.org/amigo/term/GO:0007405
intrinsic apoptotic signaling pathway in response to DNA damage by p53 class mediator	Gene Ontology	GO:0042771	2	15	0.100595	0.339314	SIRT1	BRCA2	http://amigo.geneontology.org/amigo/term/GO:0042771
cell-matrix adhesion	Gene Ontology	GO:0007160	4	52	0.102752	0.345705	CTNNB1	FGG	ITGB2	ADAM9	http://amigo.geneontology.org/amigo/term/GO:0007160
catalytic step 2 spliceosome	Gene Ontology	GO:0071013	4	52	0.102752	0.345705	SYNCRIP	PLRG1	PRPF4B	HNRNPA2B1	http://amigo.geneontology.org/amigo/term/GO:0071013
late endosome	Gene Ontology	GO:0005770	5	73	0.103198	0.346762	STX8	CLTCL1	RNF128	SNX14	TMEM59	http://amigo.geneontology.org/amigo/term/GO:0005770
cytoskeleton	Gene Ontology	GO:0005856	8	141	0.1042	0.349682	EPB41L1	FARP1	PTPN13	SPTAN1	ARL6IP5	GLG1	RIPK2	PACSIN3	http://amigo.geneontology.org/amigo/term/GO:0005856
transcription regulator complex	Gene Ontology	GO:0005667	9	165	0.105108	0.352279	EPAS1	TCF7	NAA15	RBL1	TLE3	PARP1	RB1	PRKDC	CREBBP	http://amigo.geneontology.org/amigo/term/GO:0005667
damaged DNA binding	Gene Ontology	GO:0003684	3	33	0.106121	0.354321	DDB1	CREBBP	UNG	http://amigo.geneontology.org/amigo/term/GO:0003684
transport	Gene Ontology	GO:0006810	3	33	0.106121	0.354321	GC	ALB	CNNM4	http://amigo.geneontology.org/amigo/term/GO:0006810
phosphatidylinositol-3-phosphate binding	Gene Ontology	GO:0032266	3	33	0.106121	0.354321	SESTD1	DAB2IP	VPS36	http://amigo.geneontology.org/amigo/term/GO:0032266
protein import into nucleus	Gene Ontology	GO:0006606	4	53	0.107882	0.359075	NUP214	APPL1	PHB2	NUP133	http://amigo.geneontology.org/amigo/term/GO:0006606
rhythmic process	Gene Ontology	GO:0048511	2	16	0.110871	0.359075	DDB1	KDM5B	http://amigo.geneontology.org/amigo/term/GO:0048511
mitochondrion morphogenesis	Gene Ontology	GO:0070584	2	16	0.110871	0.359075	PNPT1	NUBPL	http://amigo.geneontology.org/amigo/term/GO:0070584
mitotic cell cycle checkpoint	Gene Ontology	GO:0007093	2	16	0.110871	0.359075	INTS3	NABP2	http://amigo.geneontology.org/amigo/term/GO:0007093
four-way junction DNA binding	Gene Ontology	GO:0000400	2	16	0.110871	0.359075	XRCC3	XRCC2	http://amigo.geneontology.org/amigo/term/GO:0000400
megakaryocyte development	Gene Ontology	GO:0035855	2	16	0.110871	0.359075	PTPN11	ABI1	http://amigo.geneontology.org/amigo/term/GO:0035855
activation of protein kinase B activity	Gene Ontology	GO:0032148	2	16	0.110871	0.359075	IL18	WNT5A	http://amigo.geneontology.org/amigo/term/GO:0032148
transcription elongation from RNA polymerase II promoter	Gene Ontology	GO:0006368	2	16	0.110871	0.359075	SETD2	ELL	http://amigo.geneontology.org/amigo/term/GO:0006368
face development	Gene Ontology	GO:0060324	2	16	0.110871	0.359075	WNT5A	CHD7	http://amigo.geneontology.org/amigo/term/GO:0060324
regulation of I-kappaB kinase/NF-kappaB signaling	Gene Ontology	GO:0043122	2	16	0.110871	0.359075	WNT5A	OPTN	http://amigo.geneontology.org/amigo/term/GO:0043122
plasma membrane organization	Gene Ontology	GO:0007009	2	16	0.110871	0.359075	BAIAP2	SLC9A3R1	http://amigo.geneontology.org/amigo/term/GO:0007009
negative regulation of smoothened signaling pathway	Gene Ontology	GO:0045879	2	16	0.110871	0.359075	SERPINE2	RB1	http://amigo.geneontology.org/amigo/term/GO:0045879
cell aging	Gene Ontology	GO:0007569	2	16	0.110871	0.359075	BRCA2	NPM1	http://amigo.geneontology.org/amigo/term/GO:0007569
negative regulation of microtubule depolymerization	Gene Ontology	GO:0007026	2	16	0.110871	0.359075	FSD1	CLASP1	http://amigo.geneontology.org/amigo/term/GO:0007026
cellular response to amyloid-beta	Gene Ontology	GO:1904646	2	16	0.110871	0.359075	CACNB1	ABCC1	http://amigo.geneontology.org/amigo/term/GO:1904646
sarcoplasmic reticulum	Gene Ontology	GO:0016529	2	16	0.110871	0.359075	ITPR2	ITPR1	http://amigo.geneontology.org/amigo/term/GO:0016529
protein ADP-ribosylation	Gene Ontology	GO:0006471	2	16	0.110871	0.359075	TNKS2	MADPRT1	http://amigo.geneontology.org/amigo/term/GO:0006471
negative regulation of double-strand break repair via homologous recombination	Gene Ontology	GO:2000042	2	16	0.110871	0.359075	FANCB	PARPBP	http://amigo.geneontology.org/amigo/term/GO:2000042
positive regulation of phosphatidylinositol 3-kinase activity	Gene Ontology	GO:0043552	2	16	0.110871	0.359075	LYN	AMBRA1	http://amigo.geneontology.org/amigo/term/GO:0043552
nuclear hormone receptor binding	Gene Ontology	GO:0035257	2	16	0.110871	0.359075	CTNNB1	SIRT1	http://amigo.geneontology.org/amigo/term/GO:0035257
podosome	Gene Ontology	GO:0002102	2	16	0.110871	0.359075	BIN2	SCIN	http://amigo.geneontology.org/amigo/term/GO:0002102
adenylate cyclase-activating adrenergic receptor signaling pathway	Gene Ontology	GO:0071880	2	16	0.110871	0.359075	ADRB1	CHRM4	http://amigo.geneontology.org/amigo/term/GO:0071880
female gonad development	Gene Ontology	GO:0008585	2	16	0.110871	0.359075	BRCA2	FANCA	http://amigo.geneontology.org/amigo/term/GO:0008585
regulation of mitotic spindle assembly	Gene Ontology	GO:1901673	2	16	0.110871	0.359075	PLK1	VPS4B	http://amigo.geneontology.org/amigo/term/GO:1901673
oxidoreductase activity	Gene Ontology	GO:0016491	6	97	0.111094	0.359075	VAT1	NDOR1	F5	AKR1E2	FDXR	COQ6	http://amigo.geneontology.org/amigo/term/GO:0016491
negative regulation of canonical Wnt signaling pathway	Gene Ontology	GO:0090090	6	97	0.111094	0.359075	TLE3	AMER1	SLC9A3R1	CCDC88C	DAB2IP	STK4	http://amigo.geneontology.org/amigo/term/GO:0090090
nuclear membrane	Gene Ontology	GO:0031965	7	120	0.111553	0.360116	ZBED1	NUP133	NUP98	ZC3HC1	PLRG1	SENP1	RRP12	http://amigo.geneontology.org/amigo/term/GO:0031965
neuron migration	Gene Ontology	GO:0001764	5	75	0.111802	0.360478	CTNNB1	CHL1	NR2F2	ITGA3	DISC1	http://amigo.geneontology.org/amigo/term/GO:0001764
negative regulation of protein phosphorylation	Gene Ontology	GO:0001933	3	34	0.112893	0.362665	PTPN13	FAM129A	PRKDC	http://amigo.geneontology.org/amigo/term/GO:0001933
defense response to Gram-positive bacterium	Gene Ontology	GO:0050830	3	34	0.112893	0.362665	ACP5	RIPK2	FAU	http://amigo.geneontology.org/amigo/term/GO:0050830
hydrolase activity	Gene Ontology	GO:0016787	4	54	0.113125	0.362965	QRSL1	IFIH1	ACMSD	TMEM62	http://amigo.geneontology.org/amigo/term/GO:0016787
immune response	Gene Ontology	GO:0006955	6	98	0.114922	0.368283	IL18	BLB1	FAS	TNFAIP1	BF2	CTSS	http://amigo.geneontology.org/amigo/term/GO:0006955
DNA-binding transcription activator activity, RNA polymerase II-specific	Gene Ontology	GO:0001228	15	319	0.115982	0.371228	ZBED1	ZNF639	HSF2	ZBTB17	EPAS1	TBX21	FUBP3	PARP1	TCF7	MGA	CREBRF	CEBPZ	NR1H3	MAFF	ATF2	http://amigo.geneontology.org/amigo/term/GO:0001228
postsynaptic membrane	Gene Ontology	GO:0045211	5	76	0.116229	0.371566	CTNNB1	DAGLA	KBP	CHRM4	CLSTN3	http://amigo.geneontology.org/amigo/term/GO:0045211
ciliary basal body	Gene Ontology	GO:0036064	6	99	0.118816	0.374025	ICK	IFT57	TTLL9	DISC1	ARMC9	OFD1	http://amigo.geneontology.org/amigo/term/GO:0036064
RNA splicing	Gene Ontology	GO:0008380	3	35	0.119825	0.374025	SART3	SRSF11	THOC5	http://amigo.geneontology.org/amigo/term/GO:0008380
mediator complex	Gene Ontology	GO:0016592	3	35	0.119825	0.374025	MED13L	MED19	MED12	http://amigo.geneontology.org/amigo/term/GO:0016592
chromatin organization	Gene Ontology	GO:0006325	3	35	0.119825	0.374025	GPX4	CHD7	RB1	http://amigo.geneontology.org/amigo/term/GO:0006325
blood coagulation	Gene Ontology	GO:0007596	3	35	0.119825	0.374025	IFNAR2	F5	SERPINE2	http://amigo.geneontology.org/amigo/term/GO:0007596
cellular protein localization	Gene Ontology	GO:0034613	3	35	0.119825	0.374025	DISC1	WNT5A	SCYL3	http://amigo.geneontology.org/amigo/term/GO:0034613
regulation of cell cycle	Gene Ontology	GO:0051726	5	77	0.120739	0.374025	NUP214	E2F7	ADARB1	PTPRC	COPS5	http://amigo.geneontology.org/amigo/term/GO:0051726
protein folding chaperone	Gene Ontology	GO:0044183	2	17	0.121405	0.374025	CCT2	HSPA9	http://amigo.geneontology.org/amigo/term/GO:0044183
regulation of small GTPase mediated signal transduction	Gene Ontology	GO:0051056	2	17	0.121405	0.374025	SIPA1L1	RALGAPA1	http://amigo.geneontology.org/amigo/term/GO:0051056
early endosome to late endosome transport	Gene Ontology	GO:0045022	2	17	0.121405	0.374025	STX8	FAM160A2	http://amigo.geneontology.org/amigo/term/GO:0045022
positive regulation of vasoconstriction	Gene Ontology	GO:0045907	2	17	0.121405	0.374025	FGG	SMTNL2	http://amigo.geneontology.org/amigo/term/GO:0045907
digestive tract development	Gene Ontology	GO:0048565	2	17	0.121405	0.374025	COBL	RB1	http://amigo.geneontology.org/amigo/term/GO:0048565
homologous chromosome pairing at meiosis	Gene Ontology	GO:0007129	2	17	0.121405	0.374025	NAIF1	FANCD2	http://amigo.geneontology.org/amigo/term/GO:0007129
positive regulation of cell cycle	Gene Ontology	GO:0045787	2	17	0.121405	0.374025	CCPG1	RPS15A	http://amigo.geneontology.org/amigo/term/GO:0045787
ribosome	Gene Ontology	GO:0005840	2	17	0.121405	0.374025	MRPL37	RPL12	http://amigo.geneontology.org/amigo/term/GO:0005840
fibroblast growth factor binding	Gene Ontology	GO:0017134	2	17	0.121405	0.374025	GLG1	RPS2	http://amigo.geneontology.org/amigo/term/GO:0017134
positive regulation of neuroblast proliferation	Gene Ontology	GO:0002052	2	17	0.121405	0.374025	CTNNB1	DISC1	http://amigo.geneontology.org/amigo/term/GO:0002052
negative regulation of epithelial to mesenchymal transition	Gene Ontology	GO:0010719	2	17	0.121405	0.374025	DAB2IP	STRAP	http://amigo.geneontology.org/amigo/term/GO:0010719
pancreas development	Gene Ontology	GO:0031016	2	17	0.121405	0.374025	CTNNB1	HHEX	http://amigo.geneontology.org/amigo/term/GO:0031016
thyroid hormone receptor binding	Gene Ontology	GO:0046966	2	17	0.121405	0.374025	TRIP12	MED12	http://amigo.geneontology.org/amigo/term/GO:0046966
intraciliary transport particle B	Gene Ontology	GO:0030992	2	17	0.121405	0.374025	CLUAP1	IFT57	http://amigo.geneontology.org/amigo/term/GO:0030992
negative regulation of Rho protein signal transduction	Gene Ontology	GO:0035024	2	17	0.121405	0.374025	ITGA3	TNFAIP1	http://amigo.geneontology.org/amigo/term/GO:0035024
positive regulation of intrinsic apoptotic signaling pathway	Gene Ontology	GO:2001244	2	17	0.121405	0.374025	SLC9A3R1	BID	http://amigo.geneontology.org/amigo/term/GO:2001244
proton-transporting ATPase activity, rotational mechanism	Gene Ontology	GO:0046961	2	17	0.121405	0.374025	ATP6V1E1	ATP6V0A2	http://amigo.geneontology.org/amigo/term/GO:0046961
negative regulation of chondrocyte differentiation	Gene Ontology	GO:0032331	2	17	0.121405	0.374025	CTNNB1	PTPN11	http://amigo.geneontology.org/amigo/term/GO:0032331
response to cytokine	Gene Ontology	GO:0034097	2	17	0.121405	0.374025	EXFABP	ACP5	http://amigo.geneontology.org/amigo/term/GO:0034097
positive regulation of interferon-beta production	Gene Ontology	GO:0032728	2	17	0.121405	0.374025	PTPN11	IFIH1	http://amigo.geneontology.org/amigo/term/GO:0032728
negative regulation of viral genome replication	Gene Ontology	GO:0045071	2	17	0.121405	0.374025	RNASEL	ILF3	http://amigo.geneontology.org/amigo/term/GO:0045071
innate immune response	Gene Ontology	GO:0045087	6	101	0.126799	0.389158	ALPK1	IFIH1	CYBA	EXFABP	LYN	RIPK2	http://amigo.geneontology.org/amigo/term/GO:0045087
nuclear receptor activity	Gene Ontology	GO:0004879	3	36	0.126909	0.389158	PPARD	NR2F2	NR1H3	http://amigo.geneontology.org/amigo/term/GO:0004879
cellular response to interleukin-1	Gene Ontology	GO:0071347	3	36	0.126909	0.389158	HYAL3	DAB2IP	MAPK11	http://amigo.geneontology.org/amigo/term/GO:0071347
regulation of circadian rhythm	Gene Ontology	GO:0042752	3	36	0.126909	0.389158	DDB1	EZH2	PRKDC	http://amigo.geneontology.org/amigo/term/GO:0042752
positive regulation of apoptotic process	Gene Ontology	GO:0043065	7	125	0.129188	0.395685	CALHM2	APBB1	PRKDC	TNFRSF10B	RIPK2	ING4	SCIN	http://amigo.geneontology.org/amigo/term/GO:0043065
inorganic anion transport	Gene Ontology	GO:0015698	2	18	0.132171	0.396967	VDAC3	SLC4A2	http://amigo.geneontology.org/amigo/term/GO:0015698
positive regulation of neurogenesis	Gene Ontology	GO:0050769	2	18	0.132171	0.396967	NAP1L1	XRCC2	http://amigo.geneontology.org/amigo/term/GO:0050769
chaperone cofactor-dependent protein refolding	Gene Ontology	GO:0051085	2	18	0.132171	0.396967	HSPA9	DNAJB14	http://amigo.geneontology.org/amigo/term/GO:0051085
positive regulation of cell division	Gene Ontology	GO:0051781	2	18	0.132171	0.396967	TGFB1	VEGFA	http://amigo.geneontology.org/amigo/term/GO:0051781
metalloaminopeptidase activity	Gene Ontology	GO:0070006	2	18	0.132171	0.396967	METAP2	NPEPPS	http://amigo.geneontology.org/amigo/term/GO:0070006
poly(U) RNA binding	Gene Ontology	GO:0008266	2	18	0.132171	0.396967	DAZAP1	PNPT1	http://amigo.geneontology.org/amigo/term/GO:0008266
dynein light intermediate chain binding	Gene Ontology	GO:0051959	2	18	0.132171	0.396967	RAB11FIP3	CCDC88C	http://amigo.geneontology.org/amigo/term/GO:0051959
apoptotic signaling pathway	Gene Ontology	GO:0097190	2	18	0.132171	0.396967	PPARD	SENP1	http://amigo.geneontology.org/amigo/term/GO:0097190
lipid homeostasis	Gene Ontology	GO:0055088	2	18	0.132171	0.396967	NR1H3	ADCK1	http://amigo.geneontology.org/amigo/term/GO:0055088
embryonic cranial skeleton morphogenesis	Gene Ontology	GO:0048701	2	18	0.132171	0.396967	SETD2	SLC39A3	http://amigo.geneontology.org/amigo/term/GO:0048701
protein export from nucleus	Gene Ontology	GO:0006611	2	18	0.132171	0.396967	HSPA9	XPO7	http://amigo.geneontology.org/amigo/term/GO:0006611
bone resorption	Gene Ontology	GO:0045453	2	18	0.132171	0.396967	CTNNB1	ACP5	http://amigo.geneontology.org/amigo/term/GO:0045453
positive regulation of DNA repair	Gene Ontology	GO:0045739	2	18	0.132171	0.396967	SIRT1	UBXN7	http://amigo.geneontology.org/amigo/term/GO:0045739
cellular response to ionizing radiation	Gene Ontology	GO:0071479	2	18	0.132171	0.396967	SIRT1	INO80	http://amigo.geneontology.org/amigo/term/GO:0071479
sperm midpiece	Gene Ontology	GO:0097225	2	18	0.132171	0.396967	HYAL3	SLC9A3R1	http://amigo.geneontology.org/amigo/term/GO:0097225
monooxygenase activity	Gene Ontology	GO:0004497	2	18	0.132171	0.396967	FMO3	CYP4B7	http://amigo.geneontology.org/amigo/term/GO:0004497
angiogenesis	Gene Ontology	GO:0001525	7	126	0.132874	0.398477	IL18	EPAS1	SIRT1	MYH9	VEGFA	PDCD10	SETD2	http://amigo.geneontology.org/amigo/term/GO:0001525
tubulin binding	Gene Ontology	GO:0015631	3	37	0.134139	0.398477	STMN1	TTLL9	PRUNE1	http://amigo.geneontology.org/amigo/term/GO:0015631
nucleotide binding	Gene Ontology	GO:0000166	3	37	0.134139	0.398477	CRCP	MRPL39	NT5C3B	http://amigo.geneontology.org/amigo/term/GO:0000166
xenobiotic metabolic process	Gene Ontology	GO:0006805	3	37	0.134139	0.398477	CYP2AC1	CYP2W1	CYP2U1	http://amigo.geneontology.org/amigo/term/GO:0006805
intracellular anatomical structure	Gene Ontology	GO:0005622	3	37	0.134139	0.398477	ABI1	DHX37	SNTB1	http://amigo.geneontology.org/amigo/term/GO:0005622
positive regulation of endothelial cell proliferation	Gene Ontology	GO:0001938	3	37	0.134139	0.398477	SIRT1	VEGFA	WNT5A	http://amigo.geneontology.org/amigo/term/GO:0001938
adherens junction	Gene Ontology	GO:0005912	5	80	0.134746	0.398477	CTNNB1	DLL1	MYH9	PKP4	ARVCF	http://amigo.geneontology.org/amigo/term/GO:0005912
structural molecule activity	Gene Ontology	GO:0005198	5	80	0.134746	0.398477	EPB41L1	CLTCL1	FGG	SNTB1	KRT18	http://amigo.geneontology.org/amigo/term/GO:0005198
kinetochore	Gene Ontology	GO:0000776	4	58	0.135171	0.398477	CLASP2	KAT2B	CLASP1	NUP98	http://amigo.geneontology.org/amigo/term/GO:0000776
positive regulation of protein phosphorylation	Gene Ontology	GO:0001934	4	58	0.135171	0.398477	C3	FAS	VEGFA	FAM129A	http://amigo.geneontology.org/amigo/term/GO:0001934
cell migration	Gene Ontology	GO:0016477	8	151	0.136193	0.398477	ITGB2	CORO1C	FMNL2	MST1R	TNFAIP1	RHBDF1	SH3KBP1	FUT8	http://amigo.geneontology.org/amigo/term/GO:0016477
cellular response to tumor necrosis factor	Gene Ontology	GO:0071356	4	59	0.140937	0.398477	HYAL3	SIRT1	DAB2IP	BAG4	http://amigo.geneontology.org/amigo/term/GO:0071356
myosin complex	Gene Ontology	GO:0016459	3	38	0.141507	0.398477	MYH11	MYH9	MYH15	http://amigo.geneontology.org/amigo/term/GO:0016459
endocytic vesicle	Gene Ontology	GO:0030139	3	38	0.141507	0.398477	RAB11FIP3	DAB2IP	SH3KBP1	http://amigo.geneontology.org/amigo/term/GO:0030139
regulation of protein phosphorylation	Gene Ontology	GO:0001932	2	19	0.143144	0.398477	PLXNB2	CCDC88C	http://amigo.geneontology.org/amigo/term/GO:0001932
positive regulation of cysteine-type endopeptidase activity involved in apoptotic process	Gene Ontology	GO:0043280	2	19	0.143144	0.398477	SIRT1	ARL6IP5	http://amigo.geneontology.org/amigo/term/GO:0043280
intraciliary transport	Gene Ontology	GO:0042073	2	19	0.143144	0.398477	ICK	IFT57	http://amigo.geneontology.org/amigo/term/GO:0042073
bone morphogenesis	Gene Ontology	GO:0060349	2	19	0.143144	0.398477	GLG1	ACP5	http://amigo.geneontology.org/amigo/term/GO:0060349
meiotic cell cycle	Gene Ontology	GO:0051321	2	19	0.143144	0.398477	STK35	TUBGCP5	http://amigo.geneontology.org/amigo/term/GO:0051321
ribosomal large subunit biogenesis	Gene Ontology	GO:0042273	2	19	0.143144	0.398477	NPM1	SURF6	http://amigo.geneontology.org/amigo/term/GO:0042273
intrinsic apoptotic signaling pathway in response to endoplasmic reticulum stress	Gene Ontology	GO:0070059	2	19	0.143144	0.398477	ITPR1	DAB2IP	http://amigo.geneontology.org/amigo/term/GO:0070059
actin-dependent ATPase activity	Gene Ontology	GO:0030898	2	19	0.143144	0.398477	MYH11	MYH9	http://amigo.geneontology.org/amigo/term/GO:0030898
neuronal stem cell population maintenance	Gene Ontology	GO:0097150	2	19	0.143144	0.398477	DLL1	FANCD2	http://amigo.geneontology.org/amigo/term/GO:0097150
regulation of immune response	Gene Ontology	GO:0050776	2	19	0.143144	0.398477	SPPL2A	IRF1	http://amigo.geneontology.org/amigo/term/GO:0050776
protein targeting	Gene Ontology	GO:0006605	2	19	0.143144	0.398477	RPL11	SRPRA	http://amigo.geneontology.org/amigo/term/GO:0006605
condensed chromosome	Gene Ontology	GO:0000793	2	19	0.143144	0.398477	SMARCA5	FANCD2	http://amigo.geneontology.org/amigo/term/GO:0000793
gamma-tubulin binding	Gene Ontology	GO:0043015	2	19	0.143144	0.398477	BRCA2	TUBGCP5	http://amigo.geneontology.org/amigo/term/GO:0043015
microtubule	Gene Ontology	GO:0005874	7	129	0.144239	0.398477	STMN1	CCT2	DYNC1I2	DISC1	DYNC1LI2	TUBGCP5	MAPRE3	http://amigo.geneontology.org/amigo/term/GO:0005874
mitotic spindle	Gene Ontology	GO:0072686	4	60	0.146799	0.398477	PKP4	KIF11	CLASP1	CLASP2	http://amigo.geneontology.org/amigo/term/GO:0072686
cellular response to lipopolysaccharide	Gene Ontology	GO:0071222	4	60	0.146799	0.398477	WNT5A	ADAM9	DAB2IP	NR1H3	http://amigo.geneontology.org/amigo/term/GO:0071222
skeletal muscle cell differentiation	Gene Ontology	GO:0035914	3	39	0.149007	0.398477	BCL9L	RB1	MAFF	http://amigo.geneontology.org/amigo/term/GO:0035914
cell cycle arrest	Gene Ontology	GO:0007050	3	39	0.149007	0.398477	RASSF1	ING4	RB1	http://amigo.geneontology.org/amigo/term/GO:0007050
RNA polymerase II transcription factor binding	Gene Ontology	GO:0001085	3	39	0.149007	0.398477	CTNNB1	WWP2	CREBBP	http://amigo.geneontology.org/amigo/term/GO:0001085
wound healing	Gene Ontology	GO:0042060	3	39	0.149007	0.398477	WNT5A	VANGL2	PPARD	http://amigo.geneontology.org/amigo/term/GO:0042060
ossification	Gene Ontology	GO:0001503	3	39	0.149007	0.398477	CLEC3B	ACP5	EXT2	http://amigo.geneontology.org/amigo/term/GO:0001503
protein binding	Gene Ontology	GO:0005515	7	131	0.152065	0.398477	MYH11	STMN1	NUF2	PHB	NCAM1	PRKDC	SH3KBP1	http://amigo.geneontology.org/amigo/term/GO:0005515
defense response to virus	Gene Ontology	GO:0051607	4	61	0.152754	0.398477	SETD2	PTPRC	RNASEL	DDX60	http://amigo.geneontology.org/amigo/term/GO:0051607
protein heterodimerization activity	Gene Ontology	GO:0046982	9	181	0.154095	0.398477	TAF6	TAF4	EXT2	EPAS1	ZHX3	ITGA3	TAF8	ADRB1	CYBA	http://amigo.geneontology.org/amigo/term/GO:0046982
protein serine/threonine kinase activator activity	Gene Ontology	GO:0043539	2	20	0.154298	0.398477	TGFB1	DBF4	http://amigo.geneontology.org/amigo/term/GO:0043539
positive regulation of macroautophagy	Gene Ontology	GO:0016239	2	20	0.154298	0.398477	LARP1	SIRT1	http://amigo.geneontology.org/amigo/term/GO:0016239
microfilament motor activity	Gene Ontology	GO:0000146	2	20	0.154298	0.398477	MYH11	MYH9	http://amigo.geneontology.org/amigo/term/GO:0000146
Rho GTPase binding	Gene Ontology	GO:0017048	2	20	0.154298	0.398477	FMNL2	STRIP1	http://amigo.geneontology.org/amigo/term/GO:0017048
response to hydrogen peroxide	Gene Ontology	GO:0042542	2	20	0.154298	0.398477	ADAM9	CAT	http://amigo.geneontology.org/amigo/term/GO:0042542
negative regulation of endothelial cell proliferation	Gene Ontology	GO:0001937	2	20	0.154298	0.398477	SULF1	NR2F2	http://amigo.geneontology.org/amigo/term/GO:0001937
Notch binding	Gene Ontology	GO:0005112	2	20	0.154298	0.398477	DLL1	DLL4	http://amigo.geneontology.org/amigo/term/GO:0005112
microtubule bundle formation	Gene Ontology	GO:0001578	2	20	0.154298	0.398477	PLK1	CLASP1	http://amigo.geneontology.org/amigo/term/GO:0001578
regulation of mRNA stability	Gene Ontology	GO:0043488	2	20	0.154298	0.398477	RNASEL	CARHSP1	http://amigo.geneontology.org/amigo/term/GO:0043488
GTPase binding	Gene Ontology	GO:0051020	2	20	0.154298	0.398477	AMBRA1	GOLGA4	http://amigo.geneontology.org/amigo/term/GO:0051020
Ran GTPase binding	Gene Ontology	GO:0008536	2	20	0.154298	0.398477	MYCBP2	XPO7	http://amigo.geneontology.org/amigo/term/GO:0008536
embryonic skeletal system development	Gene Ontology	GO:0048706	2	20	0.154298	0.398477	WNT5A	SULF1	http://amigo.geneontology.org/amigo/term/GO:0048706
protein localization to cell surface	Gene Ontology	GO:0034394	2	20	0.154298	0.398477	CTNNB1	GGA3	http://amigo.geneontology.org/amigo/term/GO:0034394
metalloendopeptidase activity	Gene Ontology	GO:0004222	5	84	0.154481	0.398477	IDE	ADAM9	COPS5	MMP28	THOP1	http://amigo.geneontology.org/amigo/term/GO:0004222
actin cytoskeleton reorganization	Gene Ontology	GO:0031532	3	40	0.156632	0.398477	SIPA1L1	MYH9	PLEK	http://amigo.geneontology.org/amigo/term/GO:0031532
collagen binding	Gene Ontology	GO:0005518	3	40	0.156632	0.398477	PODN	VWF	ADAM9	http://amigo.geneontology.org/amigo/term/GO:0005518
methylated histone binding	Gene Ontology	GO:0035064	3	40	0.156632	0.398477	ING4	ATRX	KMT2E	http://amigo.geneontology.org/amigo/term/GO:0035064
calcium-dependent protein binding	Gene Ontology	GO:0048306	3	40	0.156632	0.398477	ANXA11	VPS37C	TNNC1	http://amigo.geneontology.org/amigo/term/GO:0048306
peptidyl-tyrosine dephosphorylation	Gene Ontology	GO:0035335	5	85	0.159593	0.398477	PTPN13	TNS2	PTPN11	MTMR4	PTPRC	http://amigo.geneontology.org/amigo/term/GO:0035335
RNA polymerase II transcription regulator complex	Gene Ontology	GO:0090575	3	41	0.164374	0.398477	E2F7	ASCL3	SFPQ	http://amigo.geneontology.org/amigo/term/GO:0090575
intercellular bridge	Gene Ontology	GO:0045171	3	41	0.164374	0.398477	RAB11FIP3	TRIM45	SETX	http://amigo.geneontology.org/amigo/term/GO:0045171
cytoplasmic ribonucleoprotein granule	Gene Ontology	GO:0036464	3	41	0.164374	0.398477	TAF5L	CTSH	RPLP0	http://amigo.geneontology.org/amigo/term/GO:0036464
cellular response to interferon-gamma	Gene Ontology	GO:0071346	3	41	0.164374	0.398477	STX8	WNT5A	SYNCRIP	http://amigo.geneontology.org/amigo/term/GO:0071346
chromosome	Gene Ontology	GO:0005694	3	41	0.164374	0.398477	SETD2	PRPF4B	PARP1	http://amigo.geneontology.org/amigo/term/GO:0005694
microtubule cytoskeleton organization	Gene Ontology	GO:0000226	5	86	0.164772	0.398477	DYNC1LI2	DISC1	TTLL9	CLASP2	CLASP1	http://amigo.geneontology.org/amigo/term/GO:0000226
protein tyrosine phosphatase activity	Gene Ontology	GO:0004725	5	86	0.164772	0.398477	PTPN13	TNS2	PTPN11	MTMR4	PTPRC	http://amigo.geneontology.org/amigo/term/GO:0004725
mitochondrial inner membrane	Gene Ontology	GO:0005743	5	86	0.164772	0.398477	PHB2	PHB	MRS2	MTG1	ADCK1	http://amigo.geneontology.org/amigo/term/GO:0005743
nuclear pore	Gene Ontology	GO:0005643	2	21	0.165613	0.398477	NUP214	XPO7	http://amigo.geneontology.org/amigo/term/GO:0005643
behavioral fear response	Gene Ontology	GO:0001662	2	21	0.165613	0.398477	VDAC3	FBXL20	http://amigo.geneontology.org/amigo/term/GO:0001662
negative regulation of axon extension involved in axon guidance	Gene Ontology	GO:0048843	2	21	0.165613	0.398477	WNT5A	SEMA5B	http://amigo.geneontology.org/amigo/term/GO:0048843
methyltransferase activity	Gene Ontology	GO:0008168	2	21	0.165613	0.398477	METTL4	AS3MT	http://amigo.geneontology.org/amigo/term/GO:0008168
polysomal ribosome	Gene Ontology	GO:0042788	2	21	0.165613	0.398477	LARP1	RPL11	http://amigo.geneontology.org/amigo/term/GO:0042788
COP9 signalosome	Gene Ontology	GO:0008180	2	21	0.165613	0.398477	MYH9	COPS5	http://amigo.geneontology.org/amigo/term/GO:0008180
U4/U6 x U5 tri-snRNP complex	Gene Ontology	GO:0046540	2	21	0.165613	0.398477	EFTUD2	ZMAT2	http://amigo.geneontology.org/amigo/term/GO:0046540
cytoplasmic dynein complex	Gene Ontology	GO:0005868	2	21	0.165613	0.398477	DYNC1I2	DYNC1LI2	http://amigo.geneontology.org/amigo/term/GO:0005868
fatty acid biosynthetic process	Gene Ontology	GO:0006633	2	21	0.165613	0.398477	ACLY	OXSM	http://amigo.geneontology.org/amigo/term/GO:0006633
synaptic transmission, glutamatergic	Gene Ontology	GO:0035249	2	21	0.165613	0.398477	KBP	CLSTN3	http://amigo.geneontology.org/amigo/term/GO:0035249
filamentous actin	Gene Ontology	GO:0031941	2	21	0.165613	0.398477	MYO18B	SMTNL2	http://amigo.geneontology.org/amigo/term/GO:0031941
cis-regulatory region sequence-specific DNA binding	Gene Ontology	GO:0000987	2	21	0.165613	0.398477	RB1	CREBBP	http://amigo.geneontology.org/amigo/term/GO:0000987
ciliary base	Gene Ontology	GO:0097546	2	21	0.165613	0.398477	ICK	DISC1	http://amigo.geneontology.org/amigo/term/GO:0097546
mitochondrial small ribosomal subunit	Gene Ontology	GO:0005763	2	21	0.165613	0.398477	MRPS5	MRPS22	http://amigo.geneontology.org/amigo/term/GO:0005763
regulation of multicellular organism growth	Gene Ontology	GO:0040014	2	21	0.165613	0.398477	TNKS2	FTO	http://amigo.geneontology.org/amigo/term/GO:0040014
phosphatidylinositol-4-phosphate binding	Gene Ontology	GO:0070273	2	21	0.165613	0.398477	SESTD1	DAB2IP	http://amigo.geneontology.org/amigo/term/GO:0070273
oxidation-reduction process	Gene Ontology	GO:0055114	18	421	0.166262	0.398477	FMO3	VAT1	TDO2	CYP2AC1	F5	DUS2	NDUFB7	AKR1E2	CYP4B7	PDIA3	AASS	NDOR1	CYP2W1	GPX4	FDXR	COQ6	KDM5B	CYP2U1	http://amigo.geneontology.org/amigo/term/GO:0055114
calmodulin binding	Gene Ontology	GO:0005516	5	87	0.170018	0.398477	CAMK2D	MYH11	MYH9	FAS	SPTAN1	http://amigo.geneontology.org/amigo/term/GO:0005516
regulation of transcription by RNA polymerase II	Gene Ontology	GO:0006357	17	396	0.170682	0.398477	EPAS1	IRF1	HSF2	ZBTB17	HNF4beta	GTF2E1	MED13L	ZHX3	ARID1B	RB1	NR2F2	MED12	SATB1	ASCL3	TADA1	BRD2	ATF2	http://amigo.geneontology.org/amigo/term/GO:0006357
activation of protein kinase activity	Gene Ontology	GO:0032147	3	42	0.172228	0.398477	PRKAG2	STK4	MAP4K4	http://amigo.geneontology.org/amigo/term/GO:0032147
mitochondrial intermembrane space	Gene Ontology	GO:0005758	3	42	0.172228	0.398477	NDUFB7	PNPT1	THOP1	http://amigo.geneontology.org/amigo/term/GO:0005758
negative regulation of DNA-binding transcription factor activity	Gene Ontology	GO:0043433	3	42	0.172228	0.398477	PHB2	EZH2	WWP2	http://amigo.geneontology.org/amigo/term/GO:0043433
late endosome membrane	Gene Ontology	GO:0031902	3	42	0.172228	0.398477	SPPL2A	STARD3NL	VPS36	http://amigo.geneontology.org/amigo/term/GO:0031902
ubiquitin protein ligase activity	Gene Ontology	GO:0061630	9	187	0.174929	0.398477	FSD1	WWP2	LRSAM1	RAD18	RC3H2	MYCBP2	RNF128	RNF215	TRIP12	http://amigo.geneontology.org/amigo/term/GO:0061630
CENP-A containing nucleosome assembly	Gene Ontology	GO:0034080	1	5	0.17656	0.398477	NASP	http://amigo.geneontology.org/amigo/term/GO:0034080
regulation of mRNA export from nucleus	Gene Ontology	GO:0010793	1	5	0.17656	0.398477	SETD2	http://amigo.geneontology.org/amigo/term/GO:0010793
glucose:sodium symporter activity	Gene Ontology	GO:0005412	1	5	0.17656	0.398477	SLC5A10	http://amigo.geneontology.org/amigo/term/GO:0005412
DNA synthesis involved in DNA repair	Gene Ontology	GO:0000731	1	5	0.17656	0.398477	SIRT1	http://amigo.geneontology.org/amigo/term/GO:0000731
regulation of kinase activity	Gene Ontology	GO:0043549	1	5	0.17656	0.398477	AKAP11	http://amigo.geneontology.org/amigo/term/GO:0043549
positive regulation of cardiac muscle cell differentiation	Gene Ontology	GO:2000727	1	5	0.17656	0.398477	EFNB2	http://amigo.geneontology.org/amigo/term/GO:2000727
clathrin complex	Gene Ontology	GO:0071439	1	5	0.17656	0.398477	CLTCL1	http://amigo.geneontology.org/amigo/term/GO:0071439
positive regulation of mast cell chemotaxis	Gene Ontology	GO:0060754	1	5	0.17656	0.398477	VEGFA	http://amigo.geneontology.org/amigo/term/GO:0060754
voluntary musculoskeletal movement	Gene Ontology	GO:0050882	1	5	0.17656	0.398477	ITPR1	http://amigo.geneontology.org/amigo/term/GO:0050882
non-membrane spanning protein tyrosine phosphatase activity	Gene Ontology	GO:0004726	1	5	0.17656	0.398477	PTPN11	http://amigo.geneontology.org/amigo/term/GO:0004726
positive regulation of luteinizing hormone secretion	Gene Ontology	GO:0033686	1	5	0.17656	0.398477	TGFB1	http://amigo.geneontology.org/amigo/term/GO:0033686
positive regulation of meiotic nuclear division	Gene Ontology	GO:0045836	1	5	0.17656	0.398477	WNT5A	http://amigo.geneontology.org/amigo/term/GO:0045836
cerebellar cortex development	Gene Ontology	GO:0021695	1	5	0.17656	0.398477	EZH2	http://amigo.geneontology.org/amigo/term/GO:0021695
negative regulation of biomineral tissue development	Gene Ontology	GO:0070168	1	5	0.17656	0.398477	TGFB1	http://amigo.geneontology.org/amigo/term/GO:0070168
positive regulation of MHC class II biosynthetic process	Gene Ontology	GO:0045348	1	5	0.17656	0.398477	SIRT1	http://amigo.geneontology.org/amigo/term/GO:0045348
importin-alpha family protein binding	Gene Ontology	GO:0061676	1	5	0.17656	0.398477	RB1	http://amigo.geneontology.org/amigo/term/GO:0061676
Tat protein binding	Gene Ontology	GO:0030957	1	5	0.17656	0.398477	DLL1	http://amigo.geneontology.org/amigo/term/GO:0030957
glucokinase activity	Gene Ontology	GO:0004340	1	5	0.17656	0.398477	HK2	http://amigo.geneontology.org/amigo/term/GO:0004340
CARD domain binding	Gene Ontology	GO:0050700	1	5	0.17656	0.398477	RIPK2	http://amigo.geneontology.org/amigo/term/GO:0050700
ovulation from ovarian follicle	Gene Ontology	GO:0001542	1	5	0.17656	0.398477	SIRT1	http://amigo.geneontology.org/amigo/term/GO:0001542
membranous septum morphogenesis	Gene Ontology	GO:0003149	1	5	0.17656	0.398477	VANGL2	http://amigo.geneontology.org/amigo/term/GO:0003149
Hrd1p ubiquitin ligase ERAD-L complex	Gene Ontology	GO:0000839	1	5	0.17656	0.398477	SEL1L	http://amigo.geneontology.org/amigo/term/GO:0000839
mRNA pseudouridine synthesis	Gene Ontology	GO:1990481	1	5	0.17656	0.398477	TRUB1	http://amigo.geneontology.org/amigo/term/GO:1990481
regulation of skeletal muscle satellite cell proliferation	Gene Ontology	GO:0014842	1	5	0.17656	0.398477	PPARD	http://amigo.geneontology.org/amigo/term/GO:0014842
histone demethylase activity (H3-dimethyl-K4 specific)	Gene Ontology	GO:0034648	1	5	0.17656	0.398477	KDM5B	http://amigo.geneontology.org/amigo/term/GO:0034648
regulation of cellular respiration	Gene Ontology	GO:0043457	1	5	0.17656	0.398477	PNPT1	http://amigo.geneontology.org/amigo/term/GO:0043457
manchette	Gene Ontology	GO:0002177	1	5	0.17656	0.398477	CCDC181	http://amigo.geneontology.org/amigo/term/GO:0002177
ammonium transmembrane transport	Gene Ontology	GO:0072488	1	5	0.17656	0.398477	RHAG	http://amigo.geneontology.org/amigo/term/GO:0072488
amyloid-beta clearance by cellular catabolic process	Gene Ontology	GO:0150094	1	5	0.17656	0.398477	IDE	http://amigo.geneontology.org/amigo/term/GO:0150094
positive regulation of granulocyte macrophage colony-stimulating factor production	Gene Ontology	GO:0032725	1	5	0.17656	0.398477	IL18	http://amigo.geneontology.org/amigo/term/GO:0032725
cellular sphingolipid homeostasis	Gene Ontology	GO:0090156	1	5	0.17656	0.398477	ORMDL1	http://amigo.geneontology.org/amigo/term/GO:0090156
MHC class I peptide loading complex	Gene Ontology	GO:0042824	1	5	0.17656	0.398477	PDIA3	http://amigo.geneontology.org/amigo/term/GO:0042824
dehydroascorbic acid transport	Gene Ontology	GO:0070837	1	5	0.17656	0.398477	SLC2A14	http://amigo.geneontology.org/amigo/term/GO:0070837
semaphorin receptor complex	Gene Ontology	GO:0002116	1	5	0.17656	0.398477	PLXNB2	http://amigo.geneontology.org/amigo/term/GO:0002116
female gamete generation	Gene Ontology	GO:0007292	1	5	0.17656	0.398477	MCM8	http://amigo.geneontology.org/amigo/term/GO:0007292
RNA phosphodiester bond hydrolysis	Gene Ontology	GO:0090501	1	5	0.17656	0.398477	RNASEL	http://amigo.geneontology.org/amigo/term/GO:0090501
negative regulation of glucocorticoid receptor signaling pathway	Gene Ontology	GO:2000323	1	5	0.17656	0.398477	PHB	http://amigo.geneontology.org/amigo/term/GO:2000323
acid phosphatase activity	Gene Ontology	GO:0003993	1	5	0.17656	0.398477	ACP5	http://amigo.geneontology.org/amigo/term/GO:0003993
gland morphogenesis	Gene Ontology	GO:0022612	1	5	0.17656	0.398477	SLC9A3R1	http://amigo.geneontology.org/amigo/term/GO:0022612
glomerular basement membrane development	Gene Ontology	GO:0032836	1	5	0.17656	0.398477	SULF1	http://amigo.geneontology.org/amigo/term/GO:0032836
establishment of spindle orientation	Gene Ontology	GO:0051294	1	5	0.17656	0.398477	CLASP1	http://amigo.geneontology.org/amigo/term/GO:0051294
leucine catabolic process	Gene Ontology	GO:0006552	1	5	0.17656	0.398477	MCCC2L	http://amigo.geneontology.org/amigo/term/GO:0006552
ADP-ribose diphosphatase activity	Gene Ontology	GO:0047631	1	5	0.17656	0.398477	NUDT5	http://amigo.geneontology.org/amigo/term/GO:0047631
negative regulation of interleukin-10 production	Gene Ontology	GO:0032693	1	5	0.17656	0.398477	DLL1	http://amigo.geneontology.org/amigo/term/GO:0032693
U6 snRNA binding	Gene Ontology	GO:0017070	1	5	0.17656	0.398477	SART3	http://amigo.geneontology.org/amigo/term/GO:0017070
citrate metabolic process	Gene Ontology	GO:0006101	1	5	0.17656	0.398477	ACLY	http://amigo.geneontology.org/amigo/term/GO:0006101
regulation of potassium ion transmembrane transporter activity	Gene Ontology	GO:1901016	1	5	0.17656	0.398477	WWP2	http://amigo.geneontology.org/amigo/term/GO:1901016
negative regulation of centriole replication	Gene Ontology	GO:0046600	1	5	0.17656	0.398477	KAT2B	http://amigo.geneontology.org/amigo/term/GO:0046600
negative regulation of peptidyl-cysteine S-nitrosylation	Gene Ontology	GO:1902083	1	5	0.17656	0.398477	TBC1D24	http://amigo.geneontology.org/amigo/term/GO:1902083
positive regulation of interleukin-5 production	Gene Ontology	GO:0032754	1	5	0.17656	0.398477	IL1RL1	http://amigo.geneontology.org/amigo/term/GO:0032754
iron-sulfur cluster binding	Gene Ontology	GO:0051536	1	5	0.17656	0.398477	NUBP2	http://amigo.geneontology.org/amigo/term/GO:0051536
positive regulation of transcription by RNA polymerase III	Gene Ontology	GO:0045945	1	5	0.17656	0.398477	ELL	http://amigo.geneontology.org/amigo/term/GO:0045945
dephosphorylation of RNA polymerase II C-terminal domain	Gene Ontology	GO:0070940	1	5	0.17656	0.398477	RPAP2	http://amigo.geneontology.org/amigo/term/GO:0070940
negative regulation of interleukin-1 beta production	Gene Ontology	GO:0032691	1	5	0.17656	0.398477	ACP5	http://amigo.geneontology.org/amigo/term/GO:0032691
paraxial mesoderm formation	Gene Ontology	GO:0048341	1	5	0.17656	0.398477	WNT5A	http://amigo.geneontology.org/amigo/term/GO:0048341
bone marrow development	Gene Ontology	GO:0048539	1	5	0.17656	0.398477	PTPRC	http://amigo.geneontology.org/amigo/term/GO:0048539
immunoglobulin V(D)J recombination	Gene Ontology	GO:0033152	1	5	0.17656	0.398477	PRKDC	http://amigo.geneontology.org/amigo/term/GO:0033152
mitochondrial respirasome	Gene Ontology	GO:0005746	1	5	0.17656	0.398477	COX7A2	http://amigo.geneontology.org/amigo/term/GO:0005746
maternal behavior	Gene Ontology	GO:0042711	1	5	0.17656	0.398477	CREBRF	http://amigo.geneontology.org/amigo/term/GO:0042711
antigen processing and presentation of endogenous peptide antigen via MHC class I	Gene Ontology	GO:0019885	1	5	0.17656	0.398477	IDE	http://amigo.geneontology.org/amigo/term/GO:0019885
blood coagulation, fibrin clot formation	Gene Ontology	GO:0072378	1	5	0.17656	0.398477	FGG	http://amigo.geneontology.org/amigo/term/GO:0072378
cellular response to hyperoxia	Gene Ontology	GO:0071455	1	5	0.17656	0.398477	FAS	http://amigo.geneontology.org/amigo/term/GO:0071455
negative regulation of cardiac muscle cell differentiation	Gene Ontology	GO:2000726	1	5	0.17656	0.398477	DLL1	http://amigo.geneontology.org/amigo/term/GO:2000726
kinetochore organization	Gene Ontology	GO:0051383	1	5	0.17656	0.398477	NUF2	http://amigo.geneontology.org/amigo/term/GO:0051383
embryonic neurocranium morphogenesis	Gene Ontology	GO:0048702	1	5	0.17656	0.398477	MED12	http://amigo.geneontology.org/amigo/term/GO:0048702
negative regulation of double-strand break repair	Gene Ontology	GO:2000780	1	5	0.17656	0.398477	TRIP12	http://amigo.geneontology.org/amigo/term/GO:2000780
palmitoyl-CoA hydrolase activity	Gene Ontology	GO:0016290	1	5	0.17656	0.398477	PDCD2	http://amigo.geneontology.org/amigo/term/GO:0016290
shelterin complex	Gene Ontology	GO:0070187	1	5	0.17656	0.398477	POT1	http://amigo.geneontology.org/amigo/term/GO:0070187
dehydroascorbic acid transmembrane transporter activity	Gene Ontology	GO:0033300	1	5	0.17656	0.398477	SLC2A14	http://amigo.geneontology.org/amigo/term/GO:0033300
homologous chromosome segregation	Gene Ontology	GO:0045143	1	5	0.17656	0.398477	PLK1	http://amigo.geneontology.org/amigo/term/GO:0045143
intracellular distribution of mitochondria	Gene Ontology	GO:0048312	1	5	0.17656	0.398477	CLUH	http://amigo.geneontology.org/amigo/term/GO:0048312
kinetochore microtubule	Gene Ontology	GO:0005828	1	5	0.17656	0.398477	CLASP1	http://amigo.geneontology.org/amigo/term/GO:0005828
Derlin-1 retrotranslocation complex	Gene Ontology	GO:0036513	1	5	0.17656	0.398477	SEL1L	http://amigo.geneontology.org/amigo/term/GO:0036513
morphogenesis of a branching structure	Gene Ontology	GO:0001763	1	5	0.17656	0.398477	SETD2	http://amigo.geneontology.org/amigo/term/GO:0001763
mitotic centrosome separation	Gene Ontology	GO:0007100	1	5	0.17656	0.398477	KIF11	http://amigo.geneontology.org/amigo/term/GO:0007100
paraspeckles	Gene Ontology	GO:0042382	1	5	0.17656	0.398477	SFPQ	http://amigo.geneontology.org/amigo/term/GO:0042382
positive regulation of non-canonical Wnt signaling pathway	Gene Ontology	GO:2000052	1	5	0.17656	0.398477	WNT5A	http://amigo.geneontology.org/amigo/term/GO:2000052
self proteolysis	Gene Ontology	GO:0097264	1	5	0.17656	0.398477	CAPN7	http://amigo.geneontology.org/amigo/term/GO:0097264
fatty acid elongation	Gene Ontology	GO:0030497	1	5	0.17656	0.398477	HACD2	http://amigo.geneontology.org/amigo/term/GO:0030497
negative regulation of proteasomal protein catabolic process	Gene Ontology	GO:1901799	1	5	0.17656	0.398477	FAM192A	http://amigo.geneontology.org/amigo/term/GO:1901799
UV protection	Gene Ontology	GO:0009650	1	5	0.17656	0.398477	CAT	http://amigo.geneontology.org/amigo/term/GO:0009650
peptidyl-lysine deacetylation	Gene Ontology	GO:0034983	1	5	0.17656	0.398477	SIRT1	http://amigo.geneontology.org/amigo/term/GO:0034983
positive regulation of myoblast proliferation	Gene Ontology	GO:2000288	1	5	0.17656	0.398477	PPARD	http://amigo.geneontology.org/amigo/term/GO:2000288
ubiquitin-like protein binding	Gene Ontology	GO:0032182	1	5	0.17656	0.398477	DCUN1D2	http://amigo.geneontology.org/amigo/term/GO:0032182
paranodal junction assembly	Gene Ontology	GO:0030913	1	5	0.17656	0.398477	PDCD2	http://amigo.geneontology.org/amigo/term/GO:0030913
semicircular canal morphogenesis	Gene Ontology	GO:0048752	1	5	0.17656	0.398477	CHD7	http://amigo.geneontology.org/amigo/term/GO:0048752
terminal web	Gene Ontology	GO:1990357	1	5	0.17656	0.398477	COBL	http://amigo.geneontology.org/amigo/term/GO:1990357
regulation of timing of cell differentiation	Gene Ontology	GO:0048505	1	5	0.17656	0.398477	SERPINE2	http://amigo.geneontology.org/amigo/term/GO:0048505
phosphatidylcholine transporter activity	Gene Ontology	GO:0008525	1	5	0.17656	0.398477	PITPNB	http://amigo.geneontology.org/amigo/term/GO:0008525
negative regulation of type I interferon production	Gene Ontology	GO:0032480	1	5	0.17656	0.398477	NMI	http://amigo.geneontology.org/amigo/term/GO:0032480
cellular response to lipoteichoic acid	Gene Ontology	GO:0071223	1	5	0.17656	0.398477	RIPK2	http://amigo.geneontology.org/amigo/term/GO:0071223
regulation of cellular response to oxidative stress	Gene Ontology	GO:1900407	1	5	0.17656	0.398477	FUT8	http://amigo.geneontology.org/amigo/term/GO:1900407
regulation of chromatin organization	Gene Ontology	GO:1902275	1	5	0.17656	0.398477	METTL4	http://amigo.geneontology.org/amigo/term/GO:1902275
dendritic cell differentiation	Gene Ontology	GO:0097028	1	5	0.17656	0.398477	LYN	http://amigo.geneontology.org/amigo/term/GO:0097028
membrane protein intracellular domain proteolysis	Gene Ontology	GO:0031293	1	5	0.17656	0.398477	SPPL2A	http://amigo.geneontology.org/amigo/term/GO:0031293
toxic substance binding	Gene Ontology	GO:0015643	1	5	0.17656	0.398477	ALB	http://amigo.geneontology.org/amigo/term/GO:0015643
vascular endothelial growth factor receptor 2 binding	Gene Ontology	GO:0043184	1	5	0.17656	0.398477	DAB2IP	http://amigo.geneontology.org/amigo/term/GO:0043184
hyalurononglucosaminidase activity	Gene Ontology	GO:0004415	1	5	0.17656	0.398477	HYAL3	http://amigo.geneontology.org/amigo/term/GO:0004415
necroptotic signaling pathway	Gene Ontology	GO:0097527	1	5	0.17656	0.398477	FAS	http://amigo.geneontology.org/amigo/term/GO:0097527
membrane attack complex	Gene Ontology	GO:0005579	1	5	0.17656	0.398477	C5	http://amigo.geneontology.org/amigo/term/GO:0005579
SUMO-specific protease activity	Gene Ontology	GO:0016929	1	5	0.17656	0.398477	SENP1	http://amigo.geneontology.org/amigo/term/GO:0016929
toll-like receptor 2 signaling pathway	Gene Ontology	GO:0034134	1	5	0.17656	0.398477	RIPK2	http://amigo.geneontology.org/amigo/term/GO:0034134
male germ cell nucleus	Gene Ontology	GO:0001673	1	5	0.17656	0.398477	TOPBP1	http://amigo.geneontology.org/amigo/term/GO:0001673
arachidonate-CoA ligase activity	Gene Ontology	GO:0047676	1	5	0.17656	0.398477	ACSBG2	http://amigo.geneontology.org/amigo/term/GO:0047676
DNA replication checkpoint	Gene Ontology	GO:0000076	1	5	0.17656	0.398477	TIPIN	http://amigo.geneontology.org/amigo/term/GO:0000076
endosomal vesicle fusion	Gene Ontology	GO:0034058	1	5	0.17656	0.398477	TGFBRAP1	http://amigo.geneontology.org/amigo/term/GO:0034058
replication-born double-strand break repair via sister chromatid exchange	Gene Ontology	GO:1990414	1	5	0.17656	0.398477	FANCB	http://amigo.geneontology.org/amigo/term/GO:1990414
cellular response to interleukin-6	Gene Ontology	GO:0071354	1	5	0.17656	0.398477	PHB	http://amigo.geneontology.org/amigo/term/GO:0071354
positive regulation of ER-associated ubiquitin-dependent protein catabolic process	Gene Ontology	GO:1903071	1	5	0.17656	0.398477	HERPUD1	http://amigo.geneontology.org/amigo/term/GO:1903071
regulation of platelet aggregation	Gene Ontology	GO:0090330	1	5	0.17656	0.398477	LYN	http://amigo.geneontology.org/amigo/term/GO:0090330
cellular response to muramyl dipeptide	Gene Ontology	GO:0071225	1	5	0.17656	0.398477	RIPK2	http://amigo.geneontology.org/amigo/term/GO:0071225
positive regulation of superoxide anion generation	Gene Ontology	GO:0032930	1	5	0.17656	0.398477	ITGB2	http://amigo.geneontology.org/amigo/term/GO:0032930
positive regulation of hormone secretion	Gene Ontology	GO:0046887	1	5	0.17656	0.398477	PTPN11	http://amigo.geneontology.org/amigo/term/GO:0046887
zona pellucida receptor complex	Gene Ontology	GO:0002199	1	5	0.17656	0.398477	CCT2	http://amigo.geneontology.org/amigo/term/GO:0002199
insulin binding	Gene Ontology	GO:0043559	1	5	0.17656	0.398477	IDE	http://amigo.geneontology.org/amigo/term/GO:0043559
-	Gene Ontology	GO:0045080	1	5	0.17656	0.398477	WNT5A	http://amigo.geneontology.org/amigo/term/GO:0045080
cellular response to indole-3-methanol	Gene Ontology	GO:0071681	1	5	0.17656	0.398477	CTNNB1	http://amigo.geneontology.org/amigo/term/GO:0071681
positive regulation of mRNA catabolic process	Gene Ontology	GO:0061014	1	5	0.17656	0.398477	PNPT1	http://amigo.geneontology.org/amigo/term/GO:0061014
ribosomal small subunit export from nucleus	Gene Ontology	GO:0000056	1	5	0.17656	0.398477	NPM1	http://amigo.geneontology.org/amigo/term/GO:0000056
transcription factor TFIIIC complex	Gene Ontology	GO:0000127	1	5	0.17656	0.398477	GTF3C1	http://amigo.geneontology.org/amigo/term/GO:0000127
N-terminal peptidyl-methionine acetylation	Gene Ontology	GO:0017196	1	5	0.17656	0.398477	NAA15	http://amigo.geneontology.org/amigo/term/GO:0017196
positive regulation of lipid storage	Gene Ontology	GO:0010884	1	5	0.17656	0.398477	C3	http://amigo.geneontology.org/amigo/term/GO:0010884
cellular response to misfolded protein	Gene Ontology	GO:0071218	1	5	0.17656	0.398477	DNAJB14	http://amigo.geneontology.org/amigo/term/GO:0071218
trachea formation	Gene Ontology	GO:0060440	1	5	0.17656	0.398477	CTNNB1	http://amigo.geneontology.org/amigo/term/GO:0060440
tRNA pseudouridine synthesis	Gene Ontology	GO:0031119	1	5	0.17656	0.398477	PUSL1	http://amigo.geneontology.org/amigo/term/GO:0031119
Cul4B-RING E3 ubiquitin ligase complex	Gene Ontology	GO:0031465	1	5	0.17656	0.398477	DDB1	http://amigo.geneontology.org/amigo/term/GO:0031465
interleukin-6 production	Gene Ontology	GO:0032635	1	5	0.17656	0.398477	IL18RAP	http://amigo.geneontology.org/amigo/term/GO:0032635
mitochondrial respirasome assembly	Gene Ontology	GO:0097250	1	5	0.17656	0.398477	COX7A2	http://amigo.geneontology.org/amigo/term/GO:0097250
positive regulation of gamma-delta T cell differentiation	Gene Ontology	GO:0045588	1	5	0.17656	0.398477	PTPRC	http://amigo.geneontology.org/amigo/term/GO:0045588
regulation of mitochondrial translation	Gene Ontology	GO:0070129	1	5	0.17656	0.398477	MTG1	http://amigo.geneontology.org/amigo/term/GO:0070129
aspartic endopeptidase activity, intramembrane cleaving	Gene Ontology	GO:0042500	1	5	0.17656	0.398477	SPPL2A	http://amigo.geneontology.org/amigo/term/GO:0042500
equatorial microtubule organizing center	Gene Ontology	GO:0000923	1	5	0.17656	0.398477	TUBGCP5	http://amigo.geneontology.org/amigo/term/GO:0000923
medium-chain fatty acid biosynthetic process	Gene Ontology	GO:0051792	1	5	0.17656	0.398477	OXSM	http://amigo.geneontology.org/amigo/term/GO:0051792
ubiquitin ligase inhibitor activity	Gene Ontology	GO:1990948	1	5	0.17656	0.398477	RPL11	http://amigo.geneontology.org/amigo/term/GO:1990948
fructokinase activity	Gene Ontology	GO:0008865	1	5	0.17656	0.398477	HK2	http://amigo.geneontology.org/amigo/term/GO:0008865
dorsal aorta morphogenesis	Gene Ontology	GO:0035912	1	5	0.17656	0.398477	DLL4	http://amigo.geneontology.org/amigo/term/GO:0035912
positive regulation of lamellipodium morphogenesis	Gene Ontology	GO:2000394	1	5	0.17656	0.398477	CORO1C	http://amigo.geneontology.org/amigo/term/GO:2000394
MRF binding	Gene Ontology	GO:0043426	1	5	0.17656	0.398477	CREBBP	http://amigo.geneontology.org/amigo/term/GO:0043426
Smc5-Smc6 complex	Gene Ontology	GO:0030915	1	5	0.17656	0.398477	SMC6	http://amigo.geneontology.org/amigo/term/GO:0030915
regulation of oxidative phosphorylation	Gene Ontology	GO:0002082	1	5	0.17656	0.398477	COX7A2	http://amigo.geneontology.org/amigo/term/GO:0002082
negative regulation of cellular protein catabolic process	Gene Ontology	GO:1903363	1	5	0.17656	0.398477	DAB2IP	http://amigo.geneontology.org/amigo/term/GO:1903363
CD4-positive, alpha-beta T cell differentiation	Gene Ontology	GO:0043367	1	5	0.17656	0.398477	SATB1	http://amigo.geneontology.org/amigo/term/GO:0043367
peptide alpha-N-acetyltransferase activity	Gene Ontology	GO:0004596	1	5	0.17656	0.398477	NAA15	http://amigo.geneontology.org/amigo/term/GO:0004596
acetyl-CoA biosynthetic process	Gene Ontology	GO:0006085	1	5	0.17656	0.398477	ACLY	http://amigo.geneontology.org/amigo/term/GO:0006085
phospholipase C-activating dopamine receptor signaling pathway	Gene Ontology	GO:0060158	1	5	0.17656	0.398477	SLC9A3R1	http://amigo.geneontology.org/amigo/term/GO:0060158
negative regulation of telomerase activity	Gene Ontology	GO:0051974	1	5	0.17656	0.398477	POT1	http://amigo.geneontology.org/amigo/term/GO:0051974
mannokinase activity	Gene Ontology	GO:0019158	1	5	0.17656	0.398477	HK2	http://amigo.geneontology.org/amigo/term/GO:0019158
tRNA aminoacylation for protein translation	Gene Ontology	GO:0006418	1	5	0.17656	0.398477	TARSL2	http://amigo.geneontology.org/amigo/term/GO:0006418
negative regulation of circadian rhythm	Gene Ontology	GO:0042754	1	5	0.17656	0.398477	SFPQ	http://amigo.geneontology.org/amigo/term/GO:0042754
snRNA processing	Gene Ontology	GO:0016180	1	5	0.17656	0.398477	INTS3	http://amigo.geneontology.org/amigo/term/GO:0016180
negative regulation of interleukin-17 production	Gene Ontology	GO:0032700	1	5	0.17656	0.398477	TGFB1	http://amigo.geneontology.org/amigo/term/GO:0032700
eukaryotic translation initiation factor 2B complex	Gene Ontology	GO:0005851	1	5	0.17656	0.398477	EIF2B2	http://amigo.geneontology.org/amigo/term/GO:0005851
positive regulation of macrophage cytokine production	Gene Ontology	GO:0060907	1	5	0.17656	0.398477	WNT5A	http://amigo.geneontology.org/amigo/term/GO:0060907
histone ubiquitination	Gene Ontology	GO:0016574	1	5	0.17656	0.398477	PHC1	http://amigo.geneontology.org/amigo/term/GO:0016574
selenocysteine incorporation	Gene Ontology	GO:0001514	1	5	0.17656	0.398477	EEFSEC	http://amigo.geneontology.org/amigo/term/GO:0001514
CDP-choline pathway	Gene Ontology	GO:0006657	1	5	0.17656	0.398477	PCYT1A	http://amigo.geneontology.org/amigo/term/GO:0006657
nephric duct morphogenesis	Gene Ontology	GO:0072178	1	5	0.17656	0.398477	EFNB2	http://amigo.geneontology.org/amigo/term/GO:0072178
regulation of vacuole fusion, non-autophagic	Gene Ontology	GO:0032889	1	5	0.17656	0.398477	ENO1	http://amigo.geneontology.org/amigo/term/GO:0032889
regulation of mitotic cell cycle phase transition	Gene Ontology	GO:1901990	1	5	0.17656	0.398477	DDB1	http://amigo.geneontology.org/amigo/term/GO:1901990
cellular response to increased oxygen levels	Gene Ontology	GO:0036295	1	5	0.17656	0.398477	ATP6V0A2	http://amigo.geneontology.org/amigo/term/GO:0036295
dendrite terminus	Gene Ontology	GO:0044292	1	5	0.17656	0.398477	IFT57	http://amigo.geneontology.org/amigo/term/GO:0044292
calcineurin complex	Gene Ontology	GO:0005955	1	5	0.17656	0.398477	ITPR1	http://amigo.geneontology.org/amigo/term/GO:0005955
cognition	Gene Ontology	GO:0050890	2	22	0.177065	0.398477	CHL1	CHD7	http://amigo.geneontology.org/amigo/term/GO:0050890
protein K63-linked deubiquitination	Gene Ontology	GO:0070536	2	22	0.177065	0.398477	STAMBP	OTUD7B	http://amigo.geneontology.org/amigo/term/GO:0070536
chromosome, centromeric region	Gene Ontology	GO:0000775	2	22	0.177065	0.398477	CENPU	CBX3	http://amigo.geneontology.org/amigo/term/GO:0000775
estrogen receptor binding	Gene Ontology	GO:0030331	2	22	0.177065	0.398477	CTNNB1	MMS19	http://amigo.geneontology.org/amigo/term/GO:0030331
ciliary membrane	Gene Ontology	GO:0060170	2	22	0.177065	0.398477	ARL13B	SCNN1A	http://amigo.geneontology.org/amigo/term/GO:0060170
actin filament polymerization	Gene Ontology	GO:0030041	2	22	0.177065	0.398477	COBL	ARPC2	http://amigo.geneontology.org/amigo/term/GO:0030041
establishment of protein localization	Gene Ontology	GO:0045184	2	22	0.177065	0.398477	PLK1	CORO1C	http://amigo.geneontology.org/amigo/term/GO:0045184
positive regulation of mitotic cell cycle	Gene Ontology	GO:0045931	2	22	0.177065	0.398477	PTPN11	BRCA2	http://amigo.geneontology.org/amigo/term/GO:0045931
basal plasma membrane	Gene Ontology	GO:0009925	2	22	0.177065	0.398477	MST1R	ABCC1	http://amigo.geneontology.org/amigo/term/GO:0009925
acetylglucosaminyltransferase activity	Gene Ontology	GO:0008375	2	22	0.177065	0.398477	LFNG	EXT2	http://amigo.geneontology.org/amigo/term/GO:0008375
DNA-directed 5'-3' RNA polymerase activity	Gene Ontology	GO:0003899	2	22	0.177065	0.398477	CRCP	POLR2K	http://amigo.geneontology.org/amigo/term/GO:0003899
phosphatidylcholine binding	Gene Ontology	GO:0031210	2	22	0.177065	0.398477	PCYT1A	PITPNB	http://amigo.geneontology.org/amigo/term/GO:0031210
cellular response to epidermal growth factor stimulus	Gene Ontology	GO:0071364	2	22	0.177065	0.398477	PTPN11	BAG4	http://amigo.geneontology.org/amigo/term/GO:0071364
osteoclast differentiation	Gene Ontology	GO:0030316	2	22	0.177065	0.398477	CTNNB1	TGFB1	http://amigo.geneontology.org/amigo/term/GO:0030316
immunological synapse	Gene Ontology	GO:0001772	2	22	0.177065	0.398477	ALCAM	MYH9	http://amigo.geneontology.org/amigo/term/GO:0001772
phospholipid translocation	Gene Ontology	GO:0045332	2	22	0.177065	0.398477	ATP10D	ABCC1	http://amigo.geneontology.org/amigo/term/GO:0045332
brush border membrane	Gene Ontology	GO:0031526	2	22	0.177065	0.398477	SLC27A4	SLC9A3R1	http://amigo.geneontology.org/amigo/term/GO:0031526
negative regulation of protein kinase activity	Gene Ontology	GO:0006469	3	43	0.180185	0.398477	PTPRC	DUS2	RB1	http://amigo.geneontology.org/amigo/term/GO:0006469
cytoplasmic microtubule	Gene Ontology	GO:0005881	3	43	0.180185	0.398477	MAPRE3	CLASP2	CLASP1	http://amigo.geneontology.org/amigo/term/GO:0005881
manganese ion binding	Gene Ontology	GO:0030145	3	43	0.180185	0.398477	MPPE1	PPM1B	PRIMPOL	http://amigo.geneontology.org/amigo/term/GO:0030145
Z disc	Gene Ontology	GO:0030018	4	66	0.183812	0.398477	CTNNB1	CAPZA2	MYO18B	ACTN4	http://amigo.geneontology.org/amigo/term/GO:0030018
membrane raft	Gene Ontology	GO:0045121	5	90	0.186133	0.398477	DLL1	LYN	PTPRC	SULF1	FAS	http://amigo.geneontology.org/amigo/term/GO:0045121
actin filament organization	Gene Ontology	GO:0007015	5	90	0.186133	0.398477	CORO1C	PPP1R9B	SORBS2	SH3KBP1	MPRIP	http://amigo.geneontology.org/amigo/term/GO:0007015
vasculogenesis	Gene Ontology	GO:0001570	3	44	0.188239	0.398477	TGFB1	MYO18B	HHEX	http://amigo.geneontology.org/amigo/term/GO:0001570
negative regulation of phosphoprotein phosphatase activity	Gene Ontology	GO:0032515	2	23	0.188635	0.398477	PPP1R2	PHACTR2	http://amigo.geneontology.org/amigo/term/GO:0032515
negative regulation of tumor necrosis factor production	Gene Ontology	GO:0032720	2	23	0.188635	0.398477	ACP5	NLRC3	http://amigo.geneontology.org/amigo/term/GO:0032720
negative regulation of neuron projection development	Gene Ontology	GO:0010977	2	23	0.188635	0.398477	EFNB2	PAQR3	http://amigo.geneontology.org/amigo/term/GO:0010977
protein localization to nucleus	Gene Ontology	GO:0034504	2	23	0.188635	0.398477	PLRG1	RPL11	http://amigo.geneontology.org/amigo/term/GO:0034504
miRNA binding	Gene Ontology	GO:0035198	2	23	0.188635	0.398477	PNPT1	HNRNPA2B1	http://amigo.geneontology.org/amigo/term/GO:0035198
U2-type catalytic step 2 spliceosome	Gene Ontology	GO:0071007	2	23	0.188635	0.398477	EFTUD2	PLRG1	http://amigo.geneontology.org/amigo/term/GO:0071007
ovarian follicle development	Gene Ontology	GO:0001541	2	23	0.188635	0.398477	LFNG	TAF4	http://amigo.geneontology.org/amigo/term/GO:0001541
actomyosin structure organization	Gene Ontology	GO:0031032	2	23	0.188635	0.398477	EPB41L1	MYH9	http://amigo.geneontology.org/amigo/term/GO:0031032
alpha-tubulin binding	Gene Ontology	GO:0043014	2	23	0.188635	0.398477	SETD2	INO80	http://amigo.geneontology.org/amigo/term/GO:0043014
proximal/distal pattern formation	Gene Ontology	GO:0009954	2	23	0.188635	0.398477	CTNNB1	DLL1	http://amigo.geneontology.org/amigo/term/GO:0009954
positive regulation of cell population proliferation	Gene Ontology	GO:0008284	10	217	0.189684	0.398477	EFNB2	CTSH	TIPIN	RPS15A	DLL1	CCPG1	PDCD10	EXFABP	EZH2	CRIP2	http://amigo.geneontology.org/amigo/term/GO:0008284
animal organ morphogenesis	Gene Ontology	GO:0009887	4	67	0.190257	0.398477	EFNB2	LAMA1	ASXL2	CUL1	http://amigo.geneontology.org/amigo/term/GO:0009887
chaperone binding	Gene Ontology	GO:0051087	4	67	0.190257	0.398477	GRPEL2	ALB	VWF	BAG4	http://amigo.geneontology.org/amigo/term/GO:0051087
cell-cell adhesion	Gene Ontology	GO:0098609	4	67	0.190257	0.398477	CTNNB1	MYH9	PKP4	ARVCF	http://amigo.geneontology.org/amigo/term/GO:0098609
cell adhesion	Gene Ontology	GO:0007155	8	166	0.192199	0.398477	EFNB2	LAMA1	CTNNAL1	ALCAM	ITGA3	CHL1	NCAM1	COL12A1	http://amigo.geneontology.org/amigo/term/GO:0007155
cytoplasmic vesicle membrane	Gene Ontology	GO:0030659	3	45	0.196384	0.398477	ITPR2	ITPR1	SGSM1	http://amigo.geneontology.org/amigo/term/GO:0030659
phagocytic vesicle	Gene Ontology	GO:0045335	3	45	0.196384	0.398477	ANXA11	STX8	AMBRA1	http://amigo.geneontology.org/amigo/term/GO:0045335
peptidyl-threonine phosphorylation	Gene Ontology	GO:0018107	3	45	0.196384	0.398477	NLK	PRPF4B	MAPK11	http://amigo.geneontology.org/amigo/term/GO:0018107
regulation of catalytic activity	Gene Ontology	GO:0050790	3	45	0.196384	0.398477	GRPEL2	PRKAG2	PARP1	http://amigo.geneontology.org/amigo/term/GO:0050790
proton transmembrane transport	Gene Ontology	GO:1902600	4	68	0.196773	0.398477	COX7A2	ATP6V1E1	SLC9A9	ATP6V0A2	http://amigo.geneontology.org/amigo/term/GO:1902600
cell-cell junction assembly	Gene Ontology	GO:0007043	2	24	0.200304	0.398477	PKP4	ARVCF	http://amigo.geneontology.org/amigo/term/GO:0007043
transferase activity, transferring glycosyl groups	Gene Ontology	GO:0016757	2	24	0.200304	0.398477	OGT	EXT2	http://amigo.geneontology.org/amigo/term/GO:0016757
glucose metabolic process	Gene Ontology	GO:0006006	2	24	0.200304	0.398477	HK2	PGM2	http://amigo.geneontology.org/amigo/term/GO:0006006
mitotic sister chromatid segregation	Gene Ontology	GO:0000070	2	24	0.200304	0.398477	PLK1	INO80	http://amigo.geneontology.org/amigo/term/GO:0000070
regulation of intracellular pH	Gene Ontology	GO:0051453	2	24	0.200304	0.398477	SLC9A9	SLC4A2	http://amigo.geneontology.org/amigo/term/GO:0051453
regulation of RNA splicing	Gene Ontology	GO:0043484	2	24	0.200304	0.398477	PTBP1	METTL4	http://amigo.geneontology.org/amigo/term/GO:0043484
COPII-coated ER to Golgi transport vesicle	Gene Ontology	GO:0030134	2	24	0.200304	0.398477	VANGL2	ERGIC1	http://amigo.geneontology.org/amigo/term/GO:0030134
homeostasis of number of cells within a tissue	Gene Ontology	GO:0048873	2	24	0.200304	0.398477	FH	PTPN11	http://amigo.geneontology.org/amigo/term/GO:0048873
neuromuscular junction development	Gene Ontology	GO:0007528	2	24	0.200304	0.398477	CACNB1	COL4A1	http://amigo.geneontology.org/amigo/term/GO:0007528
dendrite	Gene Ontology	GO:0030425	8	168	0.200313	0.398477	IGSF9	FARP1	ALCAM	RPLP0	TMEM266	CHL1	CRIPT	PPP1R9B	http://amigo.geneontology.org/amigo/term/GO:0030425
positive regulation of establishment of protein localization to telomere	Gene Ontology	GO:1904851	1	6	0.202798	0.398477	CCT2	http://amigo.geneontology.org/amigo/term/GO:1904851
phosphate ion binding	Gene Ontology	GO:0042301	1	6	0.202798	0.398477	SLC34A2	http://amigo.geneontology.org/amigo/term/GO:0042301
response to corticosterone	Gene Ontology	GO:0051412	1	6	0.202798	0.398477	EXFABP	http://amigo.geneontology.org/amigo/term/GO:0051412
'de novo' IMP biosynthetic process	Gene Ontology	GO:0006189	1	6	0.202798	0.398477	GART	http://amigo.geneontology.org/amigo/term/GO:0006189
monosaccharide binding	Gene Ontology	GO:0048029	1	6	0.202798	0.398477	ALPK1	http://amigo.geneontology.org/amigo/term/GO:0048029
positive regulation of T cell chemotaxis	Gene Ontology	GO:0010820	1	6	0.202798	0.398477	WNT5A	http://amigo.geneontology.org/amigo/term/GO:0010820
fascia adherens	Gene Ontology	GO:0005916	1	6	0.202798	0.398477	CTNNB1	http://amigo.geneontology.org/amigo/term/GO:0005916
fibrinogen complex	Gene Ontology	GO:0005577	1	6	0.202798	0.398477	FGG	http://amigo.geneontology.org/amigo/term/GO:0005577
histone methyltransferase activity	Gene Ontology	GO:0042054	1	6	0.202798	0.398477	PRDM11	http://amigo.geneontology.org/amigo/term/GO:0042054
type II transforming growth factor beta receptor binding	Gene Ontology	GO:0005114	1	6	0.202798	0.398477	TGFB1	http://amigo.geneontology.org/amigo/term/GO:0005114
positive regulation of actin filament depolymerization	Gene Ontology	GO:0030836	1	6	0.202798	0.398477	PLEK	http://amigo.geneontology.org/amigo/term/GO:0030836
positive regulation of RIG-I signaling pathway	Gene Ontology	GO:1900246	1	6	0.202798	0.398477	DDX60	http://amigo.geneontology.org/amigo/term/GO:1900246
DNA metabolic process	Gene Ontology	GO:0006259	1	6	0.202798	0.398477	TATDN1	http://amigo.geneontology.org/amigo/term/GO:0006259
negative regulation of oxidative stress-induced intrinsic apoptotic signaling pathway	Gene Ontology	GO:1902176	1	6	0.202798	0.398477	SIRT1	http://amigo.geneontology.org/amigo/term/GO:1902176
tumor necrosis factor-activated receptor activity	Gene Ontology	GO:0005031	1	6	0.202798	0.398477	FAS	http://amigo.geneontology.org/amigo/term/GO:0005031
positive regulation of extracellular matrix disassembly	Gene Ontology	GO:0090091	1	6	0.202798	0.398477	CLASP1	http://amigo.geneontology.org/amigo/term/GO:0090091
type I interferon signaling pathway	Gene Ontology	GO:0060337	1	6	0.202798	0.398477	IFNAR2	http://amigo.geneontology.org/amigo/term/GO:0060337
low-density lipoprotein particle remodeling	Gene Ontology	GO:0034374	1	6	0.202798	0.398477	PLA2G2E	http://amigo.geneontology.org/amigo/term/GO:0034374
mitotic G1 DNA damage checkpoint	Gene Ontology	GO:0031571	1	6	0.202798	0.398477	FBXO31	http://amigo.geneontology.org/amigo/term/GO:0031571
negative regulation of retinoic acid receptor signaling pathway	Gene Ontology	GO:0048387	1	6	0.202798	0.398477	EZH2	http://amigo.geneontology.org/amigo/term/GO:0048387
DNA replication-dependent nucleosome assembly	Gene Ontology	GO:0006335	1	6	0.202798	0.398477	NASP	http://amigo.geneontology.org/amigo/term/GO:0006335
snRNA transcription by RNA polymerase III	Gene Ontology	GO:0042796	1	6	0.202798	0.398477	ELL	http://amigo.geneontology.org/amigo/term/GO:0042796
A band	Gene Ontology	GO:0031672	1	6	0.202798	0.398477	KAT2B	http://amigo.geneontology.org/amigo/term/GO:0031672
G protein-coupled receptor kinase activity	Gene Ontology	GO:0004703	1	6	0.202798	0.398477	GRK6	http://amigo.geneontology.org/amigo/term/GO:0004703
interferon-gamma production	Gene Ontology	GO:0032609	1	6	0.202798	0.398477	IL18RAP	http://amigo.geneontology.org/amigo/term/GO:0032609
sodium channel inhibitor activity	Gene Ontology	GO:0019871	1	6	0.202798	0.398477	COMMD1	http://amigo.geneontology.org/amigo/term/GO:0019871
T cell receptor complex	Gene Ontology	GO:0042101	1	6	0.202798	0.398477	ALCAM	http://amigo.geneontology.org/amigo/term/GO:0042101
fibrinolysis	Gene Ontology	GO:0042730	1	6	0.202798	0.398477	FGG	http://amigo.geneontology.org/amigo/term/GO:0042730
regulation of locomotion	Gene Ontology	GO:0040012	1	6	0.202798	0.398477	CHRM4	http://amigo.geneontology.org/amigo/term/GO:0040012
glial cell-derived neurotrophic factor receptor signaling pathway	Gene Ontology	GO:0035860	1	6	0.202798	0.398477	SULF1	http://amigo.geneontology.org/amigo/term/GO:0035860
cyclin-dependent protein serine/threonine kinase inhibitor activity	Gene Ontology	GO:0004861	1	6	0.202798	0.398477	KAT2B	http://amigo.geneontology.org/amigo/term/GO:0004861
signaling adaptor activity	Gene Ontology	GO:0035591	1	6	0.202798	0.398477	DAB2IP	http://amigo.geneontology.org/amigo/term/GO:0035591
tRNA methyltransferase activity	Gene Ontology	GO:0008175	1	6	0.202798	0.398477	TRMT12	http://amigo.geneontology.org/amigo/term/GO:0008175
adenyl-nucleotide exchange factor activity	Gene Ontology	GO:0000774	1	6	0.202798	0.398477	GRPEL2	http://amigo.geneontology.org/amigo/term/GO:0000774
DNA translocase activity	Gene Ontology	GO:0015616	1	6	0.202798	0.398477	ATRX	http://amigo.geneontology.org/amigo/term/GO:0015616
positive regulation of keratinocyte migration	Gene Ontology	GO:0051549	1	6	0.202798	0.398477	ADAM9	http://amigo.geneontology.org/amigo/term/GO:0051549
negative regulation of platelet aggregation	Gene Ontology	GO:0090331	1	6	0.202798	0.398477	SERPINE2	http://amigo.geneontology.org/amigo/term/GO:0090331
regulation of cardiac conduction	Gene Ontology	GO:1903779	1	6	0.202798	0.398477	TNNI3K	http://amigo.geneontology.org/amigo/term/GO:1903779
telomeric D-loop disassembly	Gene Ontology	GO:0061820	1	6	0.202798	0.398477	POT1	http://amigo.geneontology.org/amigo/term/GO:0061820
histone methyltransferase binding	Gene Ontology	GO:1990226	1	6	0.202798	0.398477	CBX3	http://amigo.geneontology.org/amigo/term/GO:1990226
heparan sulfate proteoglycan binding	Gene Ontology	GO:0043395	1	6	0.202798	0.398477	PTPRC	http://amigo.geneontology.org/amigo/term/GO:0043395
response to organic cyclic compound	Gene Ontology	GO:0014070	1	6	0.202798	0.398477	HSF2	http://amigo.geneontology.org/amigo/term/GO:0014070
negative regulation of erythrocyte differentiation	Gene Ontology	GO:0045647	1	6	0.202798	0.398477	HSPA9	http://amigo.geneontology.org/amigo/term/GO:0045647
activation of cysteine-type endopeptidase activity	Gene Ontology	GO:0097202	1	6	0.202798	0.398477	RIPK2	http://amigo.geneontology.org/amigo/term/GO:0097202
paraxial mesoderm development	Gene Ontology	GO:0048339	1	6	0.202798	0.398477	NUP133	http://amigo.geneontology.org/amigo/term/GO:0048339
N6-methyladenosine-containing RNA binding	Gene Ontology	GO:1990247	1	6	0.202798	0.398477	HNRNPA2B1	http://amigo.geneontology.org/amigo/term/GO:1990247
myosin light chain binding	Gene Ontology	GO:0032027	1	6	0.202798	0.398477	MYH11	http://amigo.geneontology.org/amigo/term/GO:0032027
viral budding via host ESCRT complex	Gene Ontology	GO:0039702	1	6	0.202798	0.398477	VPS4B	http://amigo.geneontology.org/amigo/term/GO:0039702
notochord development	Gene Ontology	GO:0030903	1	6	0.202798	0.398477	COBL	http://amigo.geneontology.org/amigo/term/GO:0030903
sphingomyelin phosphodiesterase activity	Gene Ontology	GO:0004767	1	6	0.202798	0.398477	SMPD1	http://amigo.geneontology.org/amigo/term/GO:0004767
histone H3-K4 demethylation	Gene Ontology	GO:0034720	1	6	0.202798	0.398477	KDM5B	http://amigo.geneontology.org/amigo/term/GO:0034720
Golgi medial cisterna	Gene Ontology	GO:0005797	1	6	0.202798	0.398477	TMEM59	http://amigo.geneontology.org/amigo/term/GO:0005797
positive regulation of telomere maintenance	Gene Ontology	GO:0032206	1	6	0.202798	0.398477	ATRX	http://amigo.geneontology.org/amigo/term/GO:0032206
regulation of postsynaptic membrane neurotransmitter receptor levels	Gene Ontology	GO:0099072	1	6	0.202798	0.398477	EFNB2	http://amigo.geneontology.org/amigo/term/GO:0099072
positive regulation of synapse maturation	Gene Ontology	GO:0090129	1	6	0.202798	0.398477	DAB2IP	http://amigo.geneontology.org/amigo/term/GO:0090129
glycosaminoglycan biosynthetic process	Gene Ontology	GO:0006024	1	6	0.202798	0.398477	EXT2	http://amigo.geneontology.org/amigo/term/GO:0006024
positive regulation of blood coagulation	Gene Ontology	GO:0030194	1	6	0.202798	0.398477	ENPP4	http://amigo.geneontology.org/amigo/term/GO:0030194
caspase binding	Gene Ontology	GO:0089720	1	6	0.202798	0.398477	RIPK2	http://amigo.geneontology.org/amigo/term/GO:0089720
negative regulation of vascular endothelial growth factor signaling pathway	Gene Ontology	GO:1900747	1	6	0.202798	0.398477	DAB2IP	http://amigo.geneontology.org/amigo/term/GO:1900747
kinetochore binding	Gene Ontology	GO:0043515	1	6	0.202798	0.398477	CLASP1	http://amigo.geneontology.org/amigo/term/GO:0043515
chromatin silencing at telomere	Gene Ontology	GO:0006348	1	6	0.202798	0.398477	EZH2	http://amigo.geneontology.org/amigo/term/GO:0006348
cardiolipin biosynthetic process	Gene Ontology	GO:0032049	1	6	0.202798	0.398477	PGS1	http://amigo.geneontology.org/amigo/term/GO:0032049
purine ribonucleoside salvage	Gene Ontology	GO:0006166	1	6	0.202798	0.398477	ADK	http://amigo.geneontology.org/amigo/term/GO:0006166
protein lipoylation	Gene Ontology	GO:0009249	1	6	0.202798	0.398477	LIAS	http://amigo.geneontology.org/amigo/term/GO:0009249
positive regulation of cellular senescence	Gene Ontology	GO:2000774	1	6	0.202798	0.398477	SIRT1	http://amigo.geneontology.org/amigo/term/GO:2000774
rRNA base methylation	Gene Ontology	GO:0070475	1	6	0.202798	0.398477	METTL16	http://amigo.geneontology.org/amigo/term/GO:0070475
histone H4-K12 acetylation	Gene Ontology	GO:0043983	1	6	0.202798	0.398477	ING4	http://amigo.geneontology.org/amigo/term/GO:0043983
regulation of receptor signaling pathway via JAK-STAT	Gene Ontology	GO:0046425	1	6	0.202798	0.398477	PTPRC	http://amigo.geneontology.org/amigo/term/GO:0046425
peroxisome proliferator activated receptor binding	Gene Ontology	GO:0042975	1	6	0.202798	0.398477	ASXL2	http://amigo.geneontology.org/amigo/term/GO:0042975
positive regulation of astrocyte differentiation	Gene Ontology	GO:0048711	1	6	0.202798	0.398477	SERPINE2	http://amigo.geneontology.org/amigo/term/GO:0048711
pericardium development	Gene Ontology	GO:0060039	1	6	0.202798	0.398477	SETD2	http://amigo.geneontology.org/amigo/term/GO:0060039
VCP-NPL4-UFD1 AAA ATPase complex	Gene Ontology	GO:0034098	1	6	0.202798	0.398477	UBXN7	http://amigo.geneontology.org/amigo/term/GO:0034098
pre-replicative complex assembly involved in nuclear cell cycle DNA replication	Gene Ontology	GO:0006267	1	6	0.202798	0.398477	MCM2	http://amigo.geneontology.org/amigo/term/GO:0006267
regulation of calcium ion import	Gene Ontology	GO:0090279	1	6	0.202798	0.398477	CTNNB1	http://amigo.geneontology.org/amigo/term/GO:0090279
lamellipodium morphogenesis	Gene Ontology	GO:0072673	1	6	0.202798	0.398477	ABI1	http://amigo.geneontology.org/amigo/term/GO:0072673
pericardium morphogenesis	Gene Ontology	GO:0003344	1	6	0.202798	0.398477	DLL4	http://amigo.geneontology.org/amigo/term/GO:0003344
phosphatidylinositol transfer activity	Gene Ontology	GO:0008526	1	6	0.202798	0.398477	PITPNB	http://amigo.geneontology.org/amigo/term/GO:0008526
DEAD/H-box RNA helicase binding	Gene Ontology	GO:0017151	1	6	0.202798	0.398477	POT1	http://amigo.geneontology.org/amigo/term/GO:0017151
long-chain fatty acid import into cell	Gene Ontology	GO:0044539	1	6	0.202798	0.398477	SLC27A4	http://amigo.geneontology.org/amigo/term/GO:0044539
ferric iron binding	Gene Ontology	GO:0008199	1	6	0.202798	0.398477	ACP5	http://amigo.geneontology.org/amigo/term/GO:0008199
peptidyl-diphthamide biosynthetic process from peptidyl-histidine	Gene Ontology	GO:0017183	1	6	0.202798	0.398477	DPH6	http://amigo.geneontology.org/amigo/term/GO:0017183
regulation of fat cell differentiation	Gene Ontology	GO:0045598	1	6	0.202798	0.398477	PPARD	http://amigo.geneontology.org/amigo/term/GO:0045598
NADPH-hemoprotein reductase activity	Gene Ontology	GO:0003958	1	6	0.202798	0.398477	NDOR1	http://amigo.geneontology.org/amigo/term/GO:0003958
lung-associated mesenchyme development	Gene Ontology	GO:0060484	1	6	0.202798	0.398477	CTNNB1	http://amigo.geneontology.org/amigo/term/GO:0060484
negative regulation of chromatin binding	Gene Ontology	GO:0035562	1	6	0.202798	0.398477	WAPL	http://amigo.geneontology.org/amigo/term/GO:0035562
regulation of ruffle assembly	Gene Ontology	GO:1900027	1	6	0.202798	0.398477	CORO1C	http://amigo.geneontology.org/amigo/term/GO:1900027
efflux transmembrane transporter activity	Gene Ontology	GO:0015562	1	6	0.202798	0.398477	ABCC1	http://amigo.geneontology.org/amigo/term/GO:0015562
nuclear pericentric heterochromatin	Gene Ontology	GO:0031618	1	6	0.202798	0.398477	ATRX	http://amigo.geneontology.org/amigo/term/GO:0031618
myosin filament	Gene Ontology	GO:0032982	1	6	0.202798	0.398477	MYH11	http://amigo.geneontology.org/amigo/term/GO:0032982
fatty acid catabolic process	Gene Ontology	GO:0009062	1	6	0.202798	0.398477	LPIN1	http://amigo.geneontology.org/amigo/term/GO:0009062
protein localization to microtubule	Gene Ontology	GO:0035372	1	6	0.202798	0.398477	MAPRE3	http://amigo.geneontology.org/amigo/term/GO:0035372
antibacterial humoral response	Gene Ontology	GO:0019731	1	6	0.202798	0.398477	FAU	http://amigo.geneontology.org/amigo/term/GO:0019731
macropinosome	Gene Ontology	GO:0044354	1	6	0.202798	0.398477	APPL1	http://amigo.geneontology.org/amigo/term/GO:0044354
clathrin coat of coated pit	Gene Ontology	GO:0030132	1	6	0.202798	0.398477	CLTCL1	http://amigo.geneontology.org/amigo/term/GO:0030132
bile acid biosynthetic process	Gene Ontology	GO:0006699	1	6	0.202798	0.398477	BAAT	http://amigo.geneontology.org/amigo/term/GO:0006699
cysteine-type endopeptidase activator activity involved in apoptotic process	Gene Ontology	GO:0008656	1	6	0.202798	0.398477	CTSH	http://amigo.geneontology.org/amigo/term/GO:0008656
stress fiber assembly	Gene Ontology	GO:0043149	1	6	0.202798	0.398477	TNFAIP1	http://amigo.geneontology.org/amigo/term/GO:0043149
retina morphogenesis in camera-type eye	Gene Ontology	GO:0060042	1	6	0.202798	0.398477	DLL1	http://amigo.geneontology.org/amigo/term/GO:0060042
ammonium transmembrane transporter activity	Gene Ontology	GO:0008519	1	6	0.202798	0.398477	RHAG	http://amigo.geneontology.org/amigo/term/GO:0008519
positive regulation of fibroblast growth factor receptor signaling pathway	Gene Ontology	GO:0045743	1	6	0.202798	0.398477	CTNNB1	http://amigo.geneontology.org/amigo/term/GO:0045743
positive regulation of signal transduction	Gene Ontology	GO:0009967	1	6	0.202798	0.398477	EIF2A	http://amigo.geneontology.org/amigo/term/GO:0009967
regulation of protein export from nucleus	Gene Ontology	GO:0046825	1	6	0.202798	0.398477	PTPN11	http://amigo.geneontology.org/amigo/term/GO:0046825
histone pre-mRNA 3'end processing complex	Gene Ontology	GO:0071204	1	6	0.202798	0.398477	SYNCRIP	http://amigo.geneontology.org/amigo/term/GO:0071204
signaling	Gene Ontology	GO:0023052	1	6	0.202798	0.398477	APPL1	http://amigo.geneontology.org/amigo/term/GO:0023052
ubiquitin-dependent protein binding	Gene Ontology	GO:0140036	1	6	0.202798	0.398477	IDE	http://amigo.geneontology.org/amigo/term/GO:0140036
secretion by cell	Gene Ontology	GO:0032940	1	6	0.202798	0.398477	SERPINE2	http://amigo.geneontology.org/amigo/term/GO:0032940
adiponectin-activated signaling pathway	Gene Ontology	GO:0033211	1	6	0.202798	0.398477	APPL1	http://amigo.geneontology.org/amigo/term/GO:0033211
negative regulation of transcription by competitive promoter binding	Gene Ontology	GO:0010944	1	6	0.202798	0.398477	PHB	http://amigo.geneontology.org/amigo/term/GO:0010944
sarcoglycan complex	Gene Ontology	GO:0016012	1	6	0.202798	0.398477	SGCG	http://amigo.geneontology.org/amigo/term/GO:0016012
negative regulation of protein transport	Gene Ontology	GO:0051224	1	6	0.202798	0.398477	WWP2	http://amigo.geneontology.org/amigo/term/GO:0051224
response to interleukin-1	Gene Ontology	GO:0070555	1	6	0.202798	0.398477	RIPK2	http://amigo.geneontology.org/amigo/term/GO:0070555
chromosome separation	Gene Ontology	GO:0051304	1	6	0.202798	0.398477	SMARCAD1	http://amigo.geneontology.org/amigo/term/GO:0051304
histone methyltransferase activity (H3-K36 specific)	Gene Ontology	GO:0046975	1	6	0.202798	0.398477	SETD2	http://amigo.geneontology.org/amigo/term/GO:0046975
UDP-N-acetylglucosamine biosynthetic process	Gene Ontology	GO:0006048	1	6	0.202798	0.398477	GNPDA2	http://amigo.geneontology.org/amigo/term/GO:0006048
phosphatidylinositol-3,5-bisphosphate 3-phosphatase activity	Gene Ontology	GO:0052629	1	6	0.202798	0.398477	MTMR4	http://amigo.geneontology.org/amigo/term/GO:0052629
RNA polymerase II CTD heptapeptide repeat phosphatase activity	Gene Ontology	GO:0008420	1	6	0.202798	0.398477	RPAP2	http://amigo.geneontology.org/amigo/term/GO:0008420
regulation of voltage-gated calcium channel activity	Gene Ontology	GO:1901385	1	6	0.202798	0.398477	CACNB1	http://amigo.geneontology.org/amigo/term/GO:1901385
endodermal cell fate commitment	Gene Ontology	GO:0001711	1	6	0.202798	0.398477	CTNNB1	http://amigo.geneontology.org/amigo/term/GO:0001711
response to UV-C	Gene Ontology	GO:0010225	1	6	0.202798	0.398477	BRCA2	http://amigo.geneontology.org/amigo/term/GO:0010225
Sertoli cell development	Gene Ontology	GO:0060009	1	6	0.202798	0.398477	ATRX	http://amigo.geneontology.org/amigo/term/GO:0060009
AMP-activated protein kinase activity	Gene Ontology	GO:0004679	1	6	0.202798	0.398477	PRKAG2	http://amigo.geneontology.org/amigo/term/GO:0004679
nonhomologous end joining complex	Gene Ontology	GO:0070419	1	6	0.202798	0.398477	PRKDC	http://amigo.geneontology.org/amigo/term/GO:0070419
growth factor receptor binding	Gene Ontology	GO:0070851	1	6	0.202798	0.398477	SLC9A3R1	http://amigo.geneontology.org/amigo/term/GO:0070851
plasma membrane to endosome transport	Gene Ontology	GO:0048227	1	6	0.202798	0.398477	COMMD1	http://amigo.geneontology.org/amigo/term/GO:0048227
DNA ligation involved in DNA repair	Gene Ontology	GO:0051103	1	6	0.202798	0.398477	LIG3	http://amigo.geneontology.org/amigo/term/GO:0051103
nuclear export	Gene Ontology	GO:0051168	1	6	0.202798	0.398477	LSG1	http://amigo.geneontology.org/amigo/term/GO:0051168
positive regulation of natural killer cell mediated cytotoxicity	Gene Ontology	GO:0045954	1	6	0.202798	0.398477	IL18RAP	http://amigo.geneontology.org/amigo/term/GO:0045954
protein targeting to ER	Gene Ontology	GO:0045047	1	6	0.202798	0.398477	SRPRA	http://amigo.geneontology.org/amigo/term/GO:0045047
super elongation complex	Gene Ontology	GO:0032783	1	6	0.202798	0.398477	AFF1	http://amigo.geneontology.org/amigo/term/GO:0032783
death receptor binding	Gene Ontology	GO:0005123	1	6	0.202798	0.398477	DAB2IP	http://amigo.geneontology.org/amigo/term/GO:0005123
RNA polymerase II, holoenzyme	Gene Ontology	GO:0016591	1	6	0.202798	0.398477	RPAP2	http://amigo.geneontology.org/amigo/term/GO:0016591
regulation of T cell proliferation	Gene Ontology	GO:0042129	1	6	0.202798	0.398477	CTNNB1	http://amigo.geneontology.org/amigo/term/GO:0042129
mitochondrial ribosome	Gene Ontology	GO:0005761	1	6	0.202798	0.398477	MTG1	http://amigo.geneontology.org/amigo/term/GO:0005761
alditol:NADP+ 1-oxidoreductase activity	Gene Ontology	GO:0004032	1	6	0.202798	0.398477	AKR1E2	http://amigo.geneontology.org/amigo/term/GO:0004032
regulation of RNA metabolic process	Gene Ontology	GO:0051252	1	6	0.202798	0.398477	IGF2BP3	http://amigo.geneontology.org/amigo/term/GO:0051252
eukaryotic initiation factor 4E binding	Gene Ontology	GO:0008190	1	6	0.202798	0.398477	LARP1	http://amigo.geneontology.org/amigo/term/GO:0008190
alcohol dehydrogenase (NADP+) activity	Gene Ontology	GO:0008106	1	6	0.202798	0.398477	AKR1E2	http://amigo.geneontology.org/amigo/term/GO:0008106
collagen-activated tyrosine kinase receptor signaling pathway	Gene Ontology	GO:0038063	1	6	0.202798	0.398477	COL4A1	http://amigo.geneontology.org/amigo/term/GO:0038063
cranial skeletal system development	Gene Ontology	GO:1904888	1	6	0.202798	0.398477	CTNNB1	http://amigo.geneontology.org/amigo/term/GO:1904888
glycoprotein catabolic process	Gene Ontology	GO:0006516	1	6	0.202798	0.398477	NGLY1	http://amigo.geneontology.org/amigo/term/GO:0006516
response to osmotic stress	Gene Ontology	GO:0006970	1	6	0.202798	0.398477	ATF2	http://amigo.geneontology.org/amigo/term/GO:0006970
maintenance of gastrointestinal epithelium	Gene Ontology	GO:0030277	1	6	0.202798	0.398477	STRAP	http://amigo.geneontology.org/amigo/term/GO:0030277
THO complex part of transcription export complex	Gene Ontology	GO:0000445	1	6	0.202798	0.398477	THOC5	http://amigo.geneontology.org/amigo/term/GO:0000445
prefoldin complex	Gene Ontology	GO:0016272	1	6	0.202798	0.398477	PDRG1	http://amigo.geneontology.org/amigo/term/GO:0016272
condensed chromosome outer kinetochore	Gene Ontology	GO:0000940	1	6	0.202798	0.398477	NUP133	http://amigo.geneontology.org/amigo/term/GO:0000940
ligand-gated sodium channel activity	Gene Ontology	GO:0015280	1	6	0.202798	0.398477	SCNN1A	http://amigo.geneontology.org/amigo/term/GO:0015280
carbohydrate metabolic process	Gene Ontology	GO:0005975	4	69	0.203357	0.399277	HYAL3	GNPDA2	PGLS	MDH2	http://amigo.geneontology.org/amigo/term/GO:0005975
activation of GTPase activity	Gene Ontology	GO:0090630	4	70	0.210004	0.404306	CORO1C	WNT5A	TNFAIP1	SGSM1	http://amigo.geneontology.org/amigo/term/GO:0090630
transcription coregulator activity	Gene Ontology	GO:0003712	4	70	0.210004	0.404306	MED13L	MED19	TCERG1	NMI	http://amigo.geneontology.org/amigo/term/GO:0003712
positive regulation of canonical Wnt signaling pathway	Gene Ontology	GO:0090263	4	70	0.210004	0.404306	AMER1	TNKS2	PPM1B	RECK	http://amigo.geneontology.org/amigo/term/GO:0090263
regulation of postsynaptic membrane potential	Gene Ontology	GO:0060078	2	25	0.212053	0.404306	ADRB1	KBP	http://amigo.geneontology.org/amigo/term/GO:0060078
response to insulin	Gene Ontology	GO:0032868	2	25	0.212053	0.404306	OGT	SIRT1	http://amigo.geneontology.org/amigo/term/GO:0032868
face morphogenesis	Gene Ontology	GO:0060325	2	25	0.212053	0.404306	TGFB1	PTPN11	http://amigo.geneontology.org/amigo/term/GO:0060325
vesicle docking involved in exocytosis	Gene Ontology	GO:0006904	2	25	0.212053	0.404306	PLEK	SYTL2	http://amigo.geneontology.org/amigo/term/GO:0006904
Rho guanyl-nucleotide exchange factor activity	Gene Ontology	GO:0005089	2	25	0.212053	0.404306	ARHGEF11	FGD3	http://amigo.geneontology.org/amigo/term/GO:0005089
somatic stem cell population maintenance	Gene Ontology	GO:0035019	2	25	0.212053	0.404306	BCL9L	VANGL2	http://amigo.geneontology.org/amigo/term/GO:0035019
regulation of microtubule cytoskeleton organization	Gene Ontology	GO:0070507	2	25	0.212053	0.404306	RASSF1	PHLDB1	http://amigo.geneontology.org/amigo/term/GO:0070507
telomere maintenance	Gene Ontology	GO:0000723	2	25	0.212053	0.404306	POT1	PRKDC	http://amigo.geneontology.org/amigo/term/GO:0000723
serine-type endopeptidase inhibitor activity	Gene Ontology	GO:0004867	3	47	0.21292	0.404306	SERPINI1	SERPINE2	RECK	http://amigo.geneontology.org/amigo/term/GO:0004867
transcription regulatory region sequence-specific DNA binding	Gene Ontology	GO:0000976	5	96	0.219893	0.404306	PER2	ZNF639	IRF1	SFPQ	MTERF3	http://amigo.geneontology.org/amigo/term/GO:0000976
protein kinase activity	Gene Ontology	GO:0004672	5	96	0.219893	0.404306	ADCK1	SCYL3	STK35	TNNI3K	RNASEL	http://amigo.geneontology.org/amigo/term/GO:0004672
response to lipopolysaccharide	Gene Ontology	GO:0032496	3	48	0.221297	0.404306	EXFABP	ACP5	LIAS	http://amigo.geneontology.org/amigo/term/GO:0032496
flavin adenine dinucleotide binding	Gene Ontology	GO:0050660	3	48	0.221297	0.404306	FMO3	NDOR1	DUS2	http://amigo.geneontology.org/amigo/term/GO:0050660
protein autoubiquitination	Gene Ontology	GO:0051865	3	48	0.221297	0.404306	RAD18	WWP2	LRSAM1	http://amigo.geneontology.org/amigo/term/GO:0051865
integrin binding	Gene Ontology	GO:0005178	4	72	0.223477	0.404306	MYH9	VWF	ITGB2	ADAM9	http://amigo.geneontology.org/amigo/term/GO:0005178
positive regulation of actin filament polymerization	Gene Ontology	GO:0030838	2	26	0.223867	0.404306	BAIAP2	BAG4	http://amigo.geneontology.org/amigo/term/GO:0030838
inner ear development	Gene Ontology	GO:0048839	2	26	0.223867	0.404306	DLL1	PTPN11	http://amigo.geneontology.org/amigo/term/GO:0048839
protein monoubiquitination	Gene Ontology	GO:0006513	2	26	0.223867	0.404306	RAD18	CUL1	http://amigo.geneontology.org/amigo/term/GO:0006513
DNA helicase activity	Gene Ontology	GO:0003678	2	26	0.223867	0.404306	CHD7	MCM8	http://amigo.geneontology.org/amigo/term/GO:0003678
ceramide biosynthetic process	Gene Ontology	GO:0046513	2	26	0.223867	0.404306	SMPD1	ELOVL1	http://amigo.geneontology.org/amigo/term/GO:0046513
cell maturation	Gene Ontology	GO:0048469	2	26	0.223867	0.404306	CTNNB1	EPAS1	http://amigo.geneontology.org/amigo/term/GO:0048469
embryonic forelimb morphogenesis	Gene Ontology	GO:0035115	2	26	0.223867	0.404306	CTNNB1	RECK	http://amigo.geneontology.org/amigo/term/GO:0035115
phagocytosis	Gene Ontology	GO:0006909	2	26	0.223867	0.404306	ANXA11	MST1R	http://amigo.geneontology.org/amigo/term/GO:0006909
Rab guanyl-nucleotide exchange factor activity	Gene Ontology	GO:0017112	2	26	0.223867	0.404306	DENND1B	SBF2	http://amigo.geneontology.org/amigo/term/GO:0017112
actin filament bundle assembly	Gene Ontology	GO:0051017	2	26	0.223867	0.404306	BAIAP2	ACTN4	http://amigo.geneontology.org/amigo/term/GO:0051017
learning	Gene Ontology	GO:0007612	2	26	0.223867	0.404306	VDAC3	GMFB	http://amigo.geneontology.org/amigo/term/GO:0007612
external side of plasma membrane	Gene Ontology	GO:0009897	8	174	0.225448	0.404306	IDE	IL1RL1	ANTXR2	FAS	ITGA3	BF2	PTPRC	FGG	http://amigo.geneontology.org/amigo/term/GO:0009897
regulation of cell population proliferation	Gene Ontology	GO:0042127	5	97	0.225695	0.404306	TGFB1	LYN	HHEX	TCF7	FANCA	http://amigo.geneontology.org/amigo/term/GO:0042127
fatty acid elongase activity	Gene Ontology	GO:0009922	1	7	0.2282	0.404306	ELOVL1	http://amigo.geneontology.org/amigo/term/GO:0009922
positive regulation of phagocytosis, engulfment	Gene Ontology	GO:0060100	1	7	0.2282	0.404306	C3	http://amigo.geneontology.org/amigo/term/GO:0060100
respiratory burst	Gene Ontology	GO:0045730	1	7	0.2282	0.404306	CYBA	http://amigo.geneontology.org/amigo/term/GO:0045730
F-actin capping protein complex	Gene Ontology	GO:0008290	1	7	0.2282	0.404306	CAPZA2	http://amigo.geneontology.org/amigo/term/GO:0008290
peptidyl-arginine ADP-ribosylation	Gene Ontology	GO:0018120	1	7	0.2282	0.404306	MADPRT1	http://amigo.geneontology.org/amigo/term/GO:0018120
Lys63-specific deubiquitinase activity	Gene Ontology	GO:0061578	1	7	0.2282	0.404306	STAMBP	http://amigo.geneontology.org/amigo/term/GO:0061578
cellular response to exogenous dsRNA	Gene Ontology	GO:0071360	1	7	0.2282	0.404306	IFIH1	http://amigo.geneontology.org/amigo/term/GO:0071360
ether lipid biosynthetic process	Gene Ontology	GO:0008611	1	7	0.2282	0.404306	PDCD2	http://amigo.geneontology.org/amigo/term/GO:0008611
negative regulation of receptor binding	Gene Ontology	GO:1900121	1	7	0.2282	0.404306	RGMA	http://amigo.geneontology.org/amigo/term/GO:1900121
negative regulation of DNA replication	Gene Ontology	GO:0008156	1	7	0.2282	0.404306	WAPL	http://amigo.geneontology.org/amigo/term/GO:0008156
viral budding	Gene Ontology	GO:0046755	1	7	0.2282	0.404306	LRSAM1	http://amigo.geneontology.org/amigo/term/GO:0046755
nucleotide-activated protein kinase complex	Gene Ontology	GO:0031588	1	7	0.2282	0.404306	PRKAG2	http://amigo.geneontology.org/amigo/term/GO:0031588
mitogen-activated protein kinase kinase binding	Gene Ontology	GO:0031434	1	7	0.2282	0.404306	DAB2IP	http://amigo.geneontology.org/amigo/term/GO:0031434
positive regulation of myotube differentiation	Gene Ontology	GO:0010831	1	7	0.2282	0.404306	EXFABP	http://amigo.geneontology.org/amigo/term/GO:0010831
positive regulation by host of viral genome replication	Gene Ontology	GO:0044829	1	7	0.2282	0.404306	NUCKS1	http://amigo.geneontology.org/amigo/term/GO:0044829
cellular response to ethanol	Gene Ontology	GO:0071361	1	7	0.2282	0.404306	ITPR2	http://amigo.geneontology.org/amigo/term/GO:0071361
innate immune response in mucosa	Gene Ontology	GO:0002227	1	7	0.2282	0.404306	FAU	http://amigo.geneontology.org/amigo/term/GO:0002227
cellular response to hydroxyurea	Gene Ontology	GO:0072711	1	7	0.2282	0.404306	ATRX	http://amigo.geneontology.org/amigo/term/GO:0072711
axon extension involved in axon guidance	Gene Ontology	GO:0048846	1	7	0.2282	0.404306	ALCAM	http://amigo.geneontology.org/amigo/term/GO:0048846
spliceosomal tri-snRNP complex assembly	Gene Ontology	GO:0000244	1	7	0.2282	0.404306	SART3	http://amigo.geneontology.org/amigo/term/GO:0000244
actomyosin	Gene Ontology	GO:0042641	1	7	0.2282	0.404306	KAT2B	http://amigo.geneontology.org/amigo/term/GO:0042641
negative regulation of interleukin-12 production	Gene Ontology	GO:0032695	1	7	0.2282	0.404306	ACP5	http://amigo.geneontology.org/amigo/term/GO:0032695
xenobiotic transport	Gene Ontology	GO:0042908	1	7	0.2282	0.404306	ABCC1	http://amigo.geneontology.org/amigo/term/GO:0042908
TORC1 complex	Gene Ontology	GO:0031931	1	7	0.2282	0.404306	LARP1	http://amigo.geneontology.org/amigo/term/GO:0031931
cellular response to thyroid hormone stimulus	Gene Ontology	GO:0097067	1	7	0.2282	0.404306	CTSH	http://amigo.geneontology.org/amigo/term/GO:0097067
negative regulation of intrinsic apoptotic signaling pathway in response to DNA damage by p53 class mediator	Gene Ontology	GO:1902166	1	7	0.2282	0.404306	SIRT1	http://amigo.geneontology.org/amigo/term/GO:1902166
cyclin/CDK positive transcription elongation factor complex	Gene Ontology	GO:0008024	1	7	0.2282	0.404306	RB1	http://amigo.geneontology.org/amigo/term/GO:0008024
heparan sulfate proteoglycan biosynthetic process, polysaccharide chain biosynthetic process	Gene Ontology	GO:0015014	1	7	0.2282	0.404306	EXT2	http://amigo.geneontology.org/amigo/term/GO:0015014
vagina development	Gene Ontology	GO:0060068	1	7	0.2282	0.404306	WNT5A	http://amigo.geneontology.org/amigo/term/GO:0060068
pseudopodium	Gene Ontology	GO:0031143	1	7	0.2282	0.404306	ACTN4	http://amigo.geneontology.org/amigo/term/GO:0031143
positive regulation of type I interferon-mediated signaling pathway	Gene Ontology	GO:0060340	1	7	0.2282	0.404306	WNT5A	http://amigo.geneontology.org/amigo/term/GO:0060340
heparan sulfate proteoglycan biosynthetic process	Gene Ontology	GO:0015012	1	7	0.2282	0.404306	VANGL2	http://amigo.geneontology.org/amigo/term/GO:0015012
3-oxo-lignoceronyl-CoA synthase activity	Gene Ontology	GO:0102338	1	7	0.2282	0.404306	ELOVL1	http://amigo.geneontology.org/amigo/term/GO:0102338
U2-type spliceosomal complex	Gene Ontology	GO:0005684	1	7	0.2282	0.404306	HTATSF1	http://amigo.geneontology.org/amigo/term/GO:0005684
extracellular matrix assembly	Gene Ontology	GO:0085029	1	7	0.2282	0.404306	TGFB1	http://amigo.geneontology.org/amigo/term/GO:0085029
histone demethylase activity	Gene Ontology	GO:0032452	1	7	0.2282	0.404306	KDM5B	http://amigo.geneontology.org/amigo/term/GO:0032452
positive regulation of megakaryocyte differentiation	Gene Ontology	GO:0045654	1	7	0.2282	0.404306	SCIN	http://amigo.geneontology.org/amigo/term/GO:0045654
negative regulation of glycolytic process	Gene Ontology	GO:0045820	1	7	0.2282	0.404306	CBFA2T3	http://amigo.geneontology.org/amigo/term/GO:0045820
primary miRNA binding	Gene Ontology	GO:0070878	1	7	0.2282	0.404306	EZH2	http://amigo.geneontology.org/amigo/term/GO:0070878
Golgi-associated vesicle membrane	Gene Ontology	GO:0030660	1	7	0.2282	0.404306	SPPL2A	http://amigo.geneontology.org/amigo/term/GO:0030660
sphingomyelin catabolic process	Gene Ontology	GO:0006685	1	7	0.2282	0.404306	SMPD1	http://amigo.geneontology.org/amigo/term/GO:0006685
positive regulation of T cell mediated cytotoxicity	Gene Ontology	GO:0001916	1	7	0.2282	0.404306	PTPRC	http://amigo.geneontology.org/amigo/term/GO:0001916
peroxisomal matrix	Gene Ontology	GO:0005782	1	7	0.2282	0.404306	IDE	http://amigo.geneontology.org/amigo/term/GO:0005782
platelet-derived growth factor binding	Gene Ontology	GO:0048407	1	7	0.2282	0.404306	COL4A1	http://amigo.geneontology.org/amigo/term/GO:0048407
Golgi to vacuole transport	Gene Ontology	GO:0006896	1	7	0.2282	0.404306	RNF215	http://amigo.geneontology.org/amigo/term/GO:0006896
positive regulation of autophagosome assembly	Gene Ontology	GO:2000786	1	7	0.2282	0.404306	LRSAM1	http://amigo.geneontology.org/amigo/term/GO:2000786
dystroglycan binding	Gene Ontology	GO:0002162	1	7	0.2282	0.404306	CLASP1	http://amigo.geneontology.org/amigo/term/GO:0002162
negative regulation of tumor necrosis factor-mediated signaling pathway	Gene Ontology	GO:0010804	1	7	0.2282	0.404306	CCDC3	http://amigo.geneontology.org/amigo/term/GO:0010804
protein localization to lysosome	Gene Ontology	GO:0061462	1	7	0.2282	0.404306	GGA3	http://amigo.geneontology.org/amigo/term/GO:0061462
fatty acid elongation, monounsaturated fatty acid	Gene Ontology	GO:0034625	1	7	0.2282	0.404306	ELOVL1	http://amigo.geneontology.org/amigo/term/GO:0034625
sodium ion homeostasis	Gene Ontology	GO:0055078	1	7	0.2282	0.404306	SCNN1A	http://amigo.geneontology.org/amigo/term/GO:0055078
protein kinase A signaling	Gene Ontology	GO:0010737	1	7	0.2282	0.404306	MYOM1	http://amigo.geneontology.org/amigo/term/GO:0010737
histone acetyltransferase activity (H4-K5 specific)	Gene Ontology	GO:0043995	1	7	0.2282	0.404306	OGT	http://amigo.geneontology.org/amigo/term/GO:0043995
histone acetyltransferase activity (H4-K8 specific)	Gene Ontology	GO:0043996	1	7	0.2282	0.404306	OGT	http://amigo.geneontology.org/amigo/term/GO:0043996
small ribosomal subunit	Gene Ontology	GO:0015935	1	7	0.2282	0.404306	RPS16	http://amigo.geneontology.org/amigo/term/GO:0015935
embryonic foregut morphogenesis	Gene Ontology	GO:0048617	1	7	0.2282	0.404306	CTNNB1	http://amigo.geneontology.org/amigo/term/GO:0048617
Golgi trans cisterna	Gene Ontology	GO:0000138	1	7	0.2282	0.404306	TMEM59	http://amigo.geneontology.org/amigo/term/GO:0000138
chloride channel inhibitor activity	Gene Ontology	GO:0019869	1	7	0.2282	0.404306	STX8	http://amigo.geneontology.org/amigo/term/GO:0019869
ubiquitin ligase-substrate adaptor activity	Gene Ontology	GO:1990756	1	7	0.2282	0.404306	HERPUD1	http://amigo.geneontology.org/amigo/term/GO:1990756
adenylate cyclase-inhibiting G protein-coupled acetylcholine receptor signaling pathway	Gene Ontology	GO:0007197	1	7	0.2282	0.404306	CHRM4	http://amigo.geneontology.org/amigo/term/GO:0007197
digestion	Gene Ontology	GO:0007586	1	7	0.2282	0.404306	PGA5	http://amigo.geneontology.org/amigo/term/GO:0007586
multicellular organismal iron ion homeostasis	Gene Ontology	GO:0060586	1	7	0.2282	0.404306	RHAG	http://amigo.geneontology.org/amigo/term/GO:0060586
negative regulation of cardiac muscle cell proliferation	Gene Ontology	GO:0060044	1	7	0.2282	0.404306	MAPK11	http://amigo.geneontology.org/amigo/term/GO:0060044
positive regulation of synaptic transmission	Gene Ontology	GO:0050806	1	7	0.2282	0.404306	CLSTN3	http://amigo.geneontology.org/amigo/term/GO:0050806
Golgi cisterna	Gene Ontology	GO:0031985	1	7	0.2282	0.404306	GOLGA5	http://amigo.geneontology.org/amigo/term/GO:0031985
regulation of release of sequestered calcium ion into cytosol by sarcoplasmic reticulum	Gene Ontology	GO:0010880	1	7	0.2282	0.404306	CHD7	http://amigo.geneontology.org/amigo/term/GO:0010880
nuclear pore organization	Gene Ontology	GO:0006999	1	7	0.2282	0.404306	NUP133	http://amigo.geneontology.org/amigo/term/GO:0006999
oxaloacetate metabolic process	Gene Ontology	GO:0006107	1	7	0.2282	0.404306	ACLY	http://amigo.geneontology.org/amigo/term/GO:0006107
regulation of postsynaptic neurotransmitter receptor internalization	Gene Ontology	GO:0099149	1	7	0.2282	0.404306	EFNB2	http://amigo.geneontology.org/amigo/term/GO:0099149
mesodermal cell differentiation	Gene Ontology	GO:0048333	1	7	0.2282	0.404306	ITGA3	http://amigo.geneontology.org/amigo/term/GO:0048333
protein desumoylation	Gene Ontology	GO:0016926	1	7	0.2282	0.404306	SENP1	http://amigo.geneontology.org/amigo/term/GO:0016926
positive regulation of transcription of nucleolar large rRNA by RNA polymerase I	Gene Ontology	GO:1901838	1	7	0.2282	0.404306	NOL11	http://amigo.geneontology.org/amigo/term/GO:1901838
adherens junction assembly	Gene Ontology	GO:0034333	1	7	0.2282	0.404306	CTNNB1	http://amigo.geneontology.org/amigo/term/GO:0034333
DNA replication-independent nucleosome assembly	Gene Ontology	GO:0006336	1	7	0.2282	0.404306	ATRX	http://amigo.geneontology.org/amigo/term/GO:0006336
microtubule nucleation	Gene Ontology	GO:0007020	1	7	0.2282	0.404306	CLASP1	http://amigo.geneontology.org/amigo/term/GO:0007020
liver regeneration	Gene Ontology	GO:0097421	1	7	0.2282	0.404306	EZH2	http://amigo.geneontology.org/amigo/term/GO:0097421
fatty acid elongation, saturated fatty acid	Gene Ontology	GO:0019367	1	7	0.2282	0.404306	ELOVL1	http://amigo.geneontology.org/amigo/term/GO:0019367
negative regulation of calcium ion transport	Gene Ontology	GO:0051926	1	7	0.2282	0.404306	PACSIN3	http://amigo.geneontology.org/amigo/term/GO:0051926
alpha-catenin binding	Gene Ontology	GO:0045294	1	7	0.2282	0.404306	CTNNB1	http://amigo.geneontology.org/amigo/term/GO:0045294
thyroid hormone binding	Gene Ontology	GO:0070324	1	7	0.2282	0.404306	CTSH	http://amigo.geneontology.org/amigo/term/GO:0070324
3-oxo-arachidoyl-CoA synthase activity	Gene Ontology	GO:0102336	1	7	0.2282	0.404306	ELOVL1	http://amigo.geneontology.org/amigo/term/GO:0102336
negative regulation of nitric oxide biosynthetic process	Gene Ontology	GO:0045019	1	7	0.2282	0.404306	ACP5	http://amigo.geneontology.org/amigo/term/GO:0045019
microtubule organizing center organization	Gene Ontology	GO:0031023	1	7	0.2282	0.404306	CLASP1	http://amigo.geneontology.org/amigo/term/GO:0031023
LIM domain binding	Gene Ontology	GO:0030274	1	7	0.2282	0.404306	RIPK2	http://amigo.geneontology.org/amigo/term/GO:0030274
cholesterol transport	Gene Ontology	GO:0030301	1	7	0.2282	0.404306	VPS4B	http://amigo.geneontology.org/amigo/term/GO:0030301
attachment of mitotic spindle microtubules to kinetochore	Gene Ontology	GO:0051315	1	7	0.2282	0.404306	NUF2	http://amigo.geneontology.org/amigo/term/GO:0051315
diet induced thermogenesis	Gene Ontology	GO:0002024	1	7	0.2282	0.404306	ADRB1	http://amigo.geneontology.org/amigo/term/GO:0002024
fatty acid elongation, polyunsaturated fatty acid	Gene Ontology	GO:0034626	1	7	0.2282	0.404306	ELOVL1	http://amigo.geneontology.org/amigo/term/GO:0034626
neurotrophin TRK receptor signaling pathway	Gene Ontology	GO:0048011	1	7	0.2282	0.404306	PTPN11	http://amigo.geneontology.org/amigo/term/GO:0048011
positive regulation of ubiquitin protein ligase activity	Gene Ontology	GO:1904668	1	7	0.2282	0.404306	PLK1	http://amigo.geneontology.org/amigo/term/GO:1904668
positive regulation of chemokine production	Gene Ontology	GO:0032722	1	7	0.2282	0.404306	RIPK2	http://amigo.geneontology.org/amigo/term/GO:0032722
3-oxo-cerotoyl-CoA synthase activity	Gene Ontology	GO:0102337	1	7	0.2282	0.404306	ELOVL1	http://amigo.geneontology.org/amigo/term/GO:0102337
cellular response to X-ray	Gene Ontology	GO:0071481	1	7	0.2282	0.404306	NUCKS1	http://amigo.geneontology.org/amigo/term/GO:0071481
protein kinase B binding	Gene Ontology	GO:0043422	1	7	0.2282	0.404306	APPL1	http://amigo.geneontology.org/amigo/term/GO:0043422
snRNA transcription by RNA polymerase II	Gene Ontology	GO:0042795	1	7	0.2282	0.404306	ELL	http://amigo.geneontology.org/amigo/term/GO:0042795
white fat cell differentiation	Gene Ontology	GO:0050872	1	7	0.2282	0.404306	SIRT1	http://amigo.geneontology.org/amigo/term/GO:0050872
very-long-chain 3-ketoacyl-CoA synthase activity	Gene Ontology	GO:0102756	1	7	0.2282	0.404306	ELOVL1	http://amigo.geneontology.org/amigo/term/GO:0102756
phosphatase regulator activity	Gene Ontology	GO:0019208	1	7	0.2282	0.404306	SBF2	http://amigo.geneontology.org/amigo/term/GO:0019208
acute-phase response	Gene Ontology	GO:0006953	1	7	0.2282	0.404306	EXFABP	http://amigo.geneontology.org/amigo/term/GO:0006953
protein deneddylation	Gene Ontology	GO:0000338	1	7	0.2282	0.404306	COPS5	http://amigo.geneontology.org/amigo/term/GO:0000338
hydrolase activity, acting on ester bonds	Gene Ontology	GO:0016788	1	7	0.2282	0.404306	TATDN3	http://amigo.geneontology.org/amigo/term/GO:0016788
glucose transmembrane transporter activity	Gene Ontology	GO:0005355	1	7	0.2282	0.404306	SLC2A14	http://amigo.geneontology.org/amigo/term/GO:0005355
positive regulation of mitotic cell cycle spindle assembly checkpoint	Gene Ontology	GO:0090267	1	7	0.2282	0.404306	XRCC3	http://amigo.geneontology.org/amigo/term/GO:0090267
positive regulation of peptide hormone secretion	Gene Ontology	GO:0090277	1	7	0.2282	0.404306	FGG	http://amigo.geneontology.org/amigo/term/GO:0090277
CORVET complex	Gene Ontology	GO:0033263	1	7	0.2282	0.404306	TGFBRAP1	http://amigo.geneontology.org/amigo/term/GO:0033263
negative regulation of adenylate cyclase activity	Gene Ontology	GO:0007194	1	7	0.2282	0.404306	CHRM4	http://amigo.geneontology.org/amigo/term/GO:0007194
very long-chain fatty acid-CoA ligase activity	Gene Ontology	GO:0031957	1	7	0.2282	0.404306	SLC27A4	http://amigo.geneontology.org/amigo/term/GO:0031957
regulation of Rac protein signal transduction	Gene Ontology	GO:0035020	1	7	0.2282	0.404306	OGT	http://amigo.geneontology.org/amigo/term/GO:0035020
retinoic acid receptor binding	Gene Ontology	GO:0042974	1	7	0.2282	0.404306	ACTN4	http://amigo.geneontology.org/amigo/term/GO:0042974
ER membrane protein complex	Gene Ontology	GO:0072546	1	7	0.2282	0.404306	EMC1	http://amigo.geneontology.org/amigo/term/GO:0072546
phospholipid binding	Gene Ontology	GO:0005543	3	49	0.229739	0.406045	PLA2G2E	PACSIN3	BIN2	http://amigo.geneontology.org/amigo/term/GO:0005543
sodium ion transmembrane transport	Gene Ontology	GO:0035725	4	73	0.230296	0.406045	SCN4A	SLC34A2	CNNM4	SCNN1A	http://amigo.geneontology.org/amigo/term/GO:0035725
calcium ion binding	Gene Ontology	GO:0005509	18	447	0.230772	0.406045	RAB11FIP3	CLEC3B	ITPR1	ACTN4	CRELD2	SPTAN1	HSPG2	ITPR2	SULF1	ANXA11	DLL1	DLL4	TNNC1	HABP2	EFCAB5	PLA2G2E	CLSTN3	SCIN	http://amigo.geneontology.org/amigo/term/GO:0005509
anchored component of membrane	Gene Ontology	GO:0031225	2	27	0.235728	0.406045	RECK	RGMA	http://amigo.geneontology.org/amigo/term/GO:0031225
response to retinoic acid	Gene Ontology	GO:0032526	2	27	0.235728	0.406045	CTSH	GDAP2	http://amigo.geneontology.org/amigo/term/GO:0032526
histone H4 acetylation	Gene Ontology	GO:0043967	2	27	0.235728	0.406045	NAA40	BRCA2	http://amigo.geneontology.org/amigo/term/GO:0043967
cellular response to retinoic acid	Gene Ontology	GO:0071300	2	27	0.235728	0.406045	LYN	SETX	http://amigo.geneontology.org/amigo/term/GO:0071300
adaptive immune response	Gene Ontology	GO:0002250	2	27	0.235728	0.406045	ALCAM	RIPK2	http://amigo.geneontology.org/amigo/term/GO:0002250
integral component of postsynaptic density membrane	Gene Ontology	GO:0099061	2	27	0.235728	0.406045	EFNB2	CLSTN3	http://amigo.geneontology.org/amigo/term/GO:0099061
B cell receptor signaling pathway	Gene Ontology	GO:0050853	2	27	0.235728	0.406045	LYN	PTPRC	http://amigo.geneontology.org/amigo/term/GO:0050853
positive regulation of protein-containing complex assembly	Gene Ontology	GO:0031334	2	27	0.235728	0.406045	VEGFA	DAB2IP	http://amigo.geneontology.org/amigo/term/GO:0031334
copper ion binding	Gene Ontology	GO:0005507	2	27	0.235728	0.406045	COMMD1	F5	http://amigo.geneontology.org/amigo/term/GO:0005507
protein folding	Gene Ontology	GO:0006457	4	74	0.237166	0.406045	GRPEL2	PDRG1	PDIA3	HSP90B1	http://amigo.geneontology.org/amigo/term/GO:0006457
protein phosphatase binding	Gene Ontology	GO:0019903	3	50	0.238239	0.406045	CTNNB1	MTMR4	HSP90B1	http://amigo.geneontology.org/amigo/term/GO:0019903
tRNA binding	Gene Ontology	GO:0000049	3	50	0.238239	0.406045	EEFSEC	EIF2A	NAT10	http://amigo.geneontology.org/amigo/term/GO:0000049
lung development	Gene Ontology	GO:0030324	3	50	0.238239	0.406045	EPAS1	WNT5A	ITGA3	http://amigo.geneontology.org/amigo/term/GO:0030324
trans-Golgi network	Gene Ontology	GO:0005802	6	125	0.23989	0.406045	STX8	OPTN	GGA3	GOLT1A	RNF215	CLTCL1	http://amigo.geneontology.org/amigo/term/GO:0005802
homophilic cell adhesion via plasma membrane adhesion molecules	Gene Ontology	GO:0007156	5	100	0.243363	0.406045	IGSF9	ALCAM	PLXNB2	NCAM1	CLSTN3	http://amigo.geneontology.org/amigo/term/GO:0007156
heparin binding	Gene Ontology	GO:0008201	4	75	0.244084	0.406045	CLEC3B	VEGFA	PTPRC	SERPINE2	http://amigo.geneontology.org/amigo/term/GO:0008201
axoneme	Gene Ontology	GO:0005930	3	51	0.246792	0.406045	ARL13B	AMBRA1	IFT57	http://amigo.geneontology.org/amigo/term/GO:0005930
neurogenesis	Gene Ontology	GO:0022008	2	28	0.247622	0.406045	DAGLA	NUP133	http://amigo.geneontology.org/amigo/term/GO:0022008
phosphatase activity	Gene Ontology	GO:0016791	2	28	0.247622	0.406045	PRUNE1	NT5C3B	http://amigo.geneontology.org/amigo/term/GO:0016791
fatty acid metabolic process	Gene Ontology	GO:0006631	2	28	0.247622	0.406045	PPARD	BAAT	http://amigo.geneontology.org/amigo/term/GO:0006631
cellular response to transforming growth factor beta stimulus	Gene Ontology	GO:0071560	2	28	0.247622	0.406045	CLEC3B	WNT5A	http://amigo.geneontology.org/amigo/term/GO:0071560
positive regulation of tyrosine phosphorylation of STAT protein	Gene Ontology	GO:0042531	2	28	0.247622	0.406045	IL18	LYN	http://amigo.geneontology.org/amigo/term/GO:0042531
I-kappaB kinase/NF-kappaB signaling	Gene Ontology	GO:0007249	2	28	0.247622	0.406045	RIPK2	NLRC3	http://amigo.geneontology.org/amigo/term/GO:0007249
embryonic hindlimb morphogenesis	Gene Ontology	GO:0035116	2	28	0.247622	0.406045	CTNNB1	CHD7	http://amigo.geneontology.org/amigo/term/GO:0035116
RNA polymerase II repressing transcription factor binding	Gene Ontology	GO:0001103	2	28	0.247622	0.406045	PPARD	TCERG1	http://amigo.geneontology.org/amigo/term/GO:0001103
cholesterol metabolic process	Gene Ontology	GO:0008203	2	28	0.247622	0.406045	SMPD1	CAT	http://amigo.geneontology.org/amigo/term/GO:0008203
cation channel activity	Gene Ontology	GO:0005261	2	28	0.247622	0.406045	SCN4A	CALHM2	http://amigo.geneontology.org/amigo/term/GO:0005261
serine-type endopeptidase activity	Gene Ontology	GO:0004252	5	101	0.249332	0.406045	CTSH	RHBDF1	RHBDF2	HABP2	HTRA3	http://amigo.geneontology.org/amigo/term/GO:0004252
positive regulation of actin filament bundle assembly	Gene Ontology	GO:0032233	1	8	0.252795	0.406045	PLEK	http://amigo.geneontology.org/amigo/term/GO:0032233
regulation of insulin receptor signaling pathway	Gene Ontology	GO:0046626	1	8	0.252795	0.406045	OGT	http://amigo.geneontology.org/amigo/term/GO:0046626
positive regulation of ruffle assembly	Gene Ontology	GO:1900029	1	8	0.252795	0.406045	COBL	http://amigo.geneontology.org/amigo/term/GO:1900029
positive regulation of stem cell proliferation	Gene Ontology	GO:2000648	1	8	0.252795	0.406045	PTPRC	http://amigo.geneontology.org/amigo/term/GO:2000648
plasminogen activation	Gene Ontology	GO:0031639	1	8	0.252795	0.406045	FGG	http://amigo.geneontology.org/amigo/term/GO:0031639
protein localization to endosome	Gene Ontology	GO:0036010	1	8	0.252795	0.406045	AKAP11	http://amigo.geneontology.org/amigo/term/GO:0036010
blood vessel endothelial cell migration	Gene Ontology	GO:0043534	1	8	0.252795	0.406045	MYH9	http://amigo.geneontology.org/amigo/term/GO:0043534
early phagosome	Gene Ontology	GO:0032009	1	8	0.252795	0.406045	APPL1	http://amigo.geneontology.org/amigo/term/GO:0032009
membrane organization	Gene Ontology	GO:0061024	1	8	0.252795	0.406045	PDCD2	http://amigo.geneontology.org/amigo/term/GO:0061024
smooth muscle cell differentiation	Gene Ontology	GO:0051145	1	8	0.252795	0.406045	CTNNB1	http://amigo.geneontology.org/amigo/term/GO:0051145
astrocyte development	Gene Ontology	GO:0014002	1	8	0.252795	0.406045	DLL1	http://amigo.geneontology.org/amigo/term/GO:0014002
mitotic cell cycle arrest	Gene Ontology	GO:0071850	1	8	0.252795	0.406045	PNPT1	http://amigo.geneontology.org/amigo/term/GO:0071850
G protein-coupled acetylcholine receptor signaling pathway	Gene Ontology	GO:0007213	1	8	0.252795	0.406045	CHRM4	http://amigo.geneontology.org/amigo/term/GO:0007213
potassium ion transport	Gene Ontology	GO:0006813	1	8	0.252795	0.406045	VPS4B	http://amigo.geneontology.org/amigo/term/GO:0006813
regulation of protein ubiquitination	Gene Ontology	GO:0031396	1	8	0.252795	0.406045	HERPUD1	http://amigo.geneontology.org/amigo/term/GO:0031396
induction of positive chemotaxis	Gene Ontology	GO:0050930	1	8	0.252795	0.406045	VEGFA	http://amigo.geneontology.org/amigo/term/GO:0050930
lateral element	Gene Ontology	GO:0000800	1	8	0.252795	0.406045	BRCA2	http://amigo.geneontology.org/amigo/term/GO:0000800
peptide disulfide oxidoreductase activity	Gene Ontology	GO:0015037	1	8	0.252795	0.406045	PDIA3	http://amigo.geneontology.org/amigo/term/GO:0015037
microvillus assembly	Gene Ontology	GO:0030033	1	8	0.252795	0.406045	SLC9A3R1	http://amigo.geneontology.org/amigo/term/GO:0030033
microtubule-severing ATPase activity	Gene Ontology	GO:0008568	1	8	0.252795	0.406045	VPS4B	http://amigo.geneontology.org/amigo/term/GO:0008568
intraciliary retrograde transport	Gene Ontology	GO:0035721	1	8	0.252795	0.406045	ICK	http://amigo.geneontology.org/amigo/term/GO:0035721
single strand break repair	Gene Ontology	GO:0000012	1	8	0.252795	0.406045	SIRT1	http://amigo.geneontology.org/amigo/term/GO:0000012
pre-mRNA intronic binding	Gene Ontology	GO:0097157	1	8	0.252795	0.406045	HNRNPA2B1	http://amigo.geneontology.org/amigo/term/GO:0097157
progesterone receptor signaling pathway	Gene Ontology	GO:0050847	1	8	0.252795	0.406045	PHB	http://amigo.geneontology.org/amigo/term/GO:0050847
endoplasmic reticulum chaperone complex	Gene Ontology	GO:0034663	1	8	0.252795	0.406045	HSP90B1	http://amigo.geneontology.org/amigo/term/GO:0034663
G protein-coupled acetylcholine receptor activity	Gene Ontology	GO:0016907	1	8	0.252795	0.406045	CHRM4	http://amigo.geneontology.org/amigo/term/GO:0016907
troponin complex	Gene Ontology	GO:0005861	1	8	0.252795	0.406045	TNNC1	http://amigo.geneontology.org/amigo/term/GO:0005861
somatic stem cell division	Gene Ontology	GO:0048103	1	8	0.252795	0.406045	VANGL2	http://amigo.geneontology.org/amigo/term/GO:0048103
natural killer cell differentiation	Gene Ontology	GO:0001779	1	8	0.252795	0.406045	PTPRC	http://amigo.geneontology.org/amigo/term/GO:0001779
protein tyrosine kinase activator activity	Gene Ontology	GO:0030296	1	8	0.252795	0.406045	ABI1	http://amigo.geneontology.org/amigo/term/GO:0030296
regulation of proteasomal ubiquitin-dependent protein catabolic process	Gene Ontology	GO:0032434	1	8	0.252795	0.406045	COMMD1	http://amigo.geneontology.org/amigo/term/GO:0032434
arachidonic acid metabolic process	Gene Ontology	GO:0019369	1	8	0.252795	0.406045	DAGLA	http://amigo.geneontology.org/amigo/term/GO:0019369
L-glutamate transmembrane transport	Gene Ontology	GO:0015813	1	8	0.252795	0.406045	ARL6IP5	http://amigo.geneontology.org/amigo/term/GO:0015813
neural tube formation	Gene Ontology	GO:0001841	1	8	0.252795	0.406045	STK4	http://amigo.geneontology.org/amigo/term/GO:0001841
negative regulation of protein sumoylation	Gene Ontology	GO:0033234	1	8	0.252795	0.406045	CTNNB1	http://amigo.geneontology.org/amigo/term/GO:0033234
negative regulation of protein autophosphorylation	Gene Ontology	GO:0031953	1	8	0.252795	0.406045	PTPRC	http://amigo.geneontology.org/amigo/term/GO:0031953
TORC1 signaling	Gene Ontology	GO:0038202	1	8	0.252795	0.406045	LARP1	http://amigo.geneontology.org/amigo/term/GO:0038202
phosphatidylethanolamine binding	Gene Ontology	GO:0008429	1	8	0.252795	0.406045	ANXA11	http://amigo.geneontology.org/amigo/term/GO:0008429
positive regulation of DNA-templated transcription, elongation	Gene Ontology	GO:0032786	1	8	0.252795	0.406045	THOC5	http://amigo.geneontology.org/amigo/term/GO:0032786
apical protein localization	Gene Ontology	GO:0045176	1	8	0.252795	0.406045	VANGL2	http://amigo.geneontology.org/amigo/term/GO:0045176
calcium-dependent phospholipase A2 activity	Gene Ontology	GO:0047498	1	8	0.252795	0.406045	PLA2G2E	http://amigo.geneontology.org/amigo/term/GO:0047498
regulation of mast cell degranulation	Gene Ontology	GO:0043304	1	8	0.252795	0.406045	LYN	http://amigo.geneontology.org/amigo/term/GO:0043304
ribosomal large subunit export from nucleus	Gene Ontology	GO:0000055	1	8	0.252795	0.406045	NPM1	http://amigo.geneontology.org/amigo/term/GO:0000055
tRNA modification	Gene Ontology	GO:0006400	1	8	0.252795	0.406045	TRUB1	http://amigo.geneontology.org/amigo/term/GO:0006400
keratinocyte proliferation	Gene Ontology	GO:0043616	1	8	0.252795	0.406045	PPARD	http://amigo.geneontology.org/amigo/term/GO:0043616
tubulin-glutamic acid ligase activity	Gene Ontology	GO:0070740	1	8	0.252795	0.406045	TTLL9	http://amigo.geneontology.org/amigo/term/GO:0070740
MHC class II protein complex	Gene Ontology	GO:0042613	1	8	0.252795	0.406045	BLB1	http://amigo.geneontology.org/amigo/term/GO:0042613
clathrin light chain binding	Gene Ontology	GO:0032051	1	8	0.252795	0.406045	CLTCL1	http://amigo.geneontology.org/amigo/term/GO:0032051
tube formation	Gene Ontology	GO:0035148	1	8	0.252795	0.406045	DAB2IP	http://amigo.geneontology.org/amigo/term/GO:0035148
histone acetyltransferase activity (H4-K16 specific)	Gene Ontology	GO:0046972	1	8	0.252795	0.406045	OGT	http://amigo.geneontology.org/amigo/term/GO:0046972
positive regulation of histone deacetylation	Gene Ontology	GO:0031065	1	8	0.252795	0.406045	TGFB1	http://amigo.geneontology.org/amigo/term/GO:0031065
translation regulator activity	Gene Ontology	GO:0045182	1	8	0.252795	0.406045	RPS14	http://amigo.geneontology.org/amigo/term/GO:0045182
sympathetic ganglion development	Gene Ontology	GO:0061549	1	8	0.252795	0.406045	CTNNB1	http://amigo.geneontology.org/amigo/term/GO:0061549
ruffle organization	Gene Ontology	GO:0031529	1	8	0.252795	0.406045	PLEK	http://amigo.geneontology.org/amigo/term/GO:0031529
dynein light chain binding	Gene Ontology	GO:0045503	1	8	0.252795	0.406045	DYNC1I2	http://amigo.geneontology.org/amigo/term/GO:0045503
cytoskeleton-dependent intracellular transport	Gene Ontology	GO:0030705	1	8	0.252795	0.406045	CCDC88C	http://amigo.geneontology.org/amigo/term/GO:0030705
synaptic membrane	Gene Ontology	GO:0097060	1	8	0.252795	0.406045	ITGA3	http://amigo.geneontology.org/amigo/term/GO:0097060
epinephrine binding	Gene Ontology	GO:0051379	1	8	0.252795	0.406045	ADRB1	http://amigo.geneontology.org/amigo/term/GO:0051379
neuron maturation	Gene Ontology	GO:0042551	1	8	0.252795	0.406045	RB1	http://amigo.geneontology.org/amigo/term/GO:0042551
pronucleus	Gene Ontology	GO:0045120	1	8	0.252795	0.406045	EZH2	http://amigo.geneontology.org/amigo/term/GO:0045120
protein K11-linked deubiquitination	Gene Ontology	GO:0035871	1	8	0.252795	0.406045	OTUD7B	http://amigo.geneontology.org/amigo/term/GO:0035871
beta-catenin destruction complex	Gene Ontology	GO:0030877	1	8	0.252795	0.406045	CTNNB1	http://amigo.geneontology.org/amigo/term/GO:0030877
semaphorin receptor activity	Gene Ontology	GO:0017154	1	8	0.252795	0.406045	PLXNB2	http://amigo.geneontology.org/amigo/term/GO:0017154
Golgi ribbon formation	Gene Ontology	GO:0090161	1	8	0.252795	0.406045	OPTN	http://amigo.geneontology.org/amigo/term/GO:0090161
chaperonin-containing T-complex	Gene Ontology	GO:0005832	1	8	0.252795	0.406045	CCT2	http://amigo.geneontology.org/amigo/term/GO:0005832
specific granule	Gene Ontology	GO:0042581	1	8	0.252795	0.406045	ANXA11	http://amigo.geneontology.org/amigo/term/GO:0042581
glomerulus development	Gene Ontology	GO:0032835	1	8	0.252795	0.406045	VANGL2	http://amigo.geneontology.org/amigo/term/GO:0032835
negative regulation of pathway-restricted SMAD protein phosphorylation	Gene Ontology	GO:0060394	1	8	0.252795	0.406045	STRAP	http://amigo.geneontology.org/amigo/term/GO:0060394
positive regulation of neuron migration	Gene Ontology	GO:2001224	1	8	0.252795	0.406045	DAB2IP	http://amigo.geneontology.org/amigo/term/GO:2001224
vacuole	Gene Ontology	GO:0005773	1	8	0.252795	0.406045	MST1R	http://amigo.geneontology.org/amigo/term/GO:0005773
NAD(P)+-protein-arginine ADP-ribosyltransferase activity	Gene Ontology	GO:0003956	1	8	0.252795	0.406045	MADPRT1	http://amigo.geneontology.org/amigo/term/GO:0003956
semaphorin-plexin signaling pathway involved in axon guidance	Gene Ontology	GO:1902287	1	8	0.252795	0.406045	PLXNB2	http://amigo.geneontology.org/amigo/term/GO:1902287
protein import into peroxisome matrix	Gene Ontology	GO:0016558	1	8	0.252795	0.406045	PEX6	http://amigo.geneontology.org/amigo/term/GO:0016558
cytoplasmic exosome (RNase complex)	Gene Ontology	GO:0000177	1	8	0.252795	0.406045	CARHSP1	http://amigo.geneontology.org/amigo/term/GO:0000177
transcription preinitiation complex	Gene Ontology	GO:0097550	1	8	0.252795	0.406045	GTF2E1	http://amigo.geneontology.org/amigo/term/GO:0097550
postreplication repair	Gene Ontology	GO:0006301	1	8	0.252795	0.406045	RAD18	http://amigo.geneontology.org/amigo/term/GO:0006301
lamin binding	Gene Ontology	GO:0005521	1	8	0.252795	0.406045	SUN2	http://amigo.geneontology.org/amigo/term/GO:0005521
axon development	Gene Ontology	GO:0061564	1	8	0.252795	0.406045	TBC1D24	http://amigo.geneontology.org/amigo/term/GO:0061564
cAMP-dependent protein kinase inhibitor activity	Gene Ontology	GO:0004862	1	8	0.252795	0.406045	PRKAG2	http://amigo.geneontology.org/amigo/term/GO:0004862
amyloid-beta metabolic process	Gene Ontology	GO:0050435	1	8	0.252795	0.406045	IDE	http://amigo.geneontology.org/amigo/term/GO:0050435
adenylate cyclase-activating dopamine receptor signaling pathway	Gene Ontology	GO:0007191	1	8	0.252795	0.406045	SLC9A3R1	http://amigo.geneontology.org/amigo/term/GO:0007191
negative regulation of amyloid-beta formation	Gene Ontology	GO:1902430	1	8	0.252795	0.406045	GGA3	http://amigo.geneontology.org/amigo/term/GO:1902430
oocyte development	Gene Ontology	GO:0048599	1	8	0.252795	0.406045	CTNNB1	http://amigo.geneontology.org/amigo/term/GO:0048599
myosin II binding	Gene Ontology	GO:0045159	1	8	0.252795	0.406045	MYH11	http://amigo.geneontology.org/amigo/term/GO:0045159
maintenance of epithelial cell apical/basal polarity	Gene Ontology	GO:0045199	1	8	0.252795	0.406045	SLC9A3R1	http://amigo.geneontology.org/amigo/term/GO:0045199
endothelin receptor signaling pathway	Gene Ontology	GO:0086100	1	8	0.252795	0.406045	EDNRB	http://amigo.geneontology.org/amigo/term/GO:0086100
negative regulation by host of viral transcription	Gene Ontology	GO:0043922	1	8	0.252795	0.406045	ZNF639	http://amigo.geneontology.org/amigo/term/GO:0043922
negative regulation of hippo signaling	Gene Ontology	GO:0035331	1	8	0.252795	0.406045	WWC2	http://amigo.geneontology.org/amigo/term/GO:0035331
regulation of transforming growth factor beta receptor signaling pathway	Gene Ontology	GO:0017015	1	8	0.252795	0.406045	ITGA3	http://amigo.geneontology.org/amigo/term/GO:0017015
protein deglycosylation	Gene Ontology	GO:0006517	1	8	0.252795	0.406045	NGLY1	http://amigo.geneontology.org/amigo/term/GO:0006517
receptor recycling	Gene Ontology	GO:0001881	1	8	0.252795	0.406045	CAMLG	http://amigo.geneontology.org/amigo/term/GO:0001881
negative regulation of axon regeneration	Gene Ontology	GO:0048681	1	8	0.252795	0.406045	RGMA	http://amigo.geneontology.org/amigo/term/GO:0048681
positive regulation of heterotypic cell-cell adhesion	Gene Ontology	GO:0034116	1	8	0.252795	0.406045	FGG	http://amigo.geneontology.org/amigo/term/GO:0034116
small ribosomal subunit rRNA binding	Gene Ontology	GO:0070181	1	8	0.252795	0.406045	RPS14	http://amigo.geneontology.org/amigo/term/GO:0070181
nuclear origin of replication recognition complex	Gene Ontology	GO:0005664	1	8	0.252795	0.406045	MCM2	http://amigo.geneontology.org/amigo/term/GO:0005664
negative regulation of innate immune response	Gene Ontology	GO:0045824	1	8	0.252795	0.406045	NMI	http://amigo.geneontology.org/amigo/term/GO:0045824
negative regulation of intracellular estrogen receptor signaling pathway	Gene Ontology	GO:0033147	1	8	0.252795	0.406045	PHB2	http://amigo.geneontology.org/amigo/term/GO:0033147
translation activator activity	Gene Ontology	GO:0008494	1	8	0.252795	0.406045	LARP1	http://amigo.geneontology.org/amigo/term/GO:0008494
sequestering of actin monomers	Gene Ontology	GO:0042989	1	8	0.252795	0.406045	SCIN	http://amigo.geneontology.org/amigo/term/GO:0042989
long-chain fatty-acyl-CoA biosynthetic process	Gene Ontology	GO:0035338	1	8	0.252795	0.406045	ELOVL1	http://amigo.geneontology.org/amigo/term/GO:0035338
granulocyte differentiation	Gene Ontology	GO:0030851	1	8	0.252795	0.406045	CBFA2T3	http://amigo.geneontology.org/amigo/term/GO:0030851
Ctf18 RFC-like complex	Gene Ontology	GO:0031390	1	8	0.252795	0.406045	RFC4	http://amigo.geneontology.org/amigo/term/GO:0031390
regulation of cytokine secretion	Gene Ontology	GO:0050707	1	8	0.252795	0.406045	LYN	http://amigo.geneontology.org/amigo/term/GO:0050707
negative regulation of translational initiation	Gene Ontology	GO:0045947	1	8	0.252795	0.406045	LARP1	http://amigo.geneontology.org/amigo/term/GO:0045947
nuclear pore complex assembly	Gene Ontology	GO:0051292	1	8	0.252795	0.406045	NUP98	http://amigo.geneontology.org/amigo/term/GO:0051292
cellular protein catabolic process	Gene Ontology	GO:0044257	1	8	0.252795	0.406045	DAB2IP	http://amigo.geneontology.org/amigo/term/GO:0044257
myeloid dendritic cell differentiation	Gene Ontology	GO:0043011	1	8	0.252795	0.406045	TGFB1	http://amigo.geneontology.org/amigo/term/GO:0043011
positive regulation of endothelial cell differentiation	Gene Ontology	GO:0045603	1	8	0.252795	0.406045	CTNNB1	http://amigo.geneontology.org/amigo/term/GO:0045603
neuron remodeling	Gene Ontology	GO:0016322	1	8	0.252795	0.406045	C3	http://amigo.geneontology.org/amigo/term/GO:0016322
nucleotide metabolic process	Gene Ontology	GO:0009117	1	8	0.252795	0.406045	NT5C3B	http://amigo.geneontology.org/amigo/term/GO:0009117
branching involved in salivary gland morphogenesis	Gene Ontology	GO:0060445	1	8	0.252795	0.406045	LAMA1	http://amigo.geneontology.org/amigo/term/GO:0060445
anaphase-promoting complex binding	Gene Ontology	GO:0010997	1	8	0.252795	0.406045	PLK1	http://amigo.geneontology.org/amigo/term/GO:0010997
nuclear pore nuclear basket	Gene Ontology	GO:0044615	1	8	0.252795	0.406045	NUP98	http://amigo.geneontology.org/amigo/term/GO:0044615
NAD biosynthetic process	Gene Ontology	GO:0009435	1	8	0.252795	0.406045	QPRT	http://amigo.geneontology.org/amigo/term/GO:0009435
long-chain fatty acid transport	Gene Ontology	GO:0015909	1	8	0.252795	0.406045	EXFABP	http://amigo.geneontology.org/amigo/term/GO:0015909
translesion synthesis	Gene Ontology	GO:0019985	1	8	0.252795	0.406045	PRIMPOL	http://amigo.geneontology.org/amigo/term/GO:0019985
signal transduction involved in G2 DNA damage checkpoint	Gene Ontology	GO:0072425	1	8	0.252795	0.406045	PLK1	http://amigo.geneontology.org/amigo/term/GO:0072425
RNA catabolic process	Gene Ontology	GO:0006401	1	8	0.252795	0.406045	PNPT1	http://amigo.geneontology.org/amigo/term/GO:0006401
peptide hormone receptor binding	Gene Ontology	GO:0051428	1	8	0.252795	0.406045	PTPN11	http://amigo.geneontology.org/amigo/term/GO:0051428
iron ion binding	Gene Ontology	GO:0005506	5	102	0.255339	0.408967	CYP2AC1	CYP4B7	CYP2W1	FBXL5	CYP2U1	http://amigo.geneontology.org/amigo/term/GO:0005506
transcription by RNA polymerase II	Gene Ontology	GO:0006366	3	52	0.255391	0.408967	TAF5L	POLR2H	NMI	http://amigo.geneontology.org/amigo/term/GO:0006366
molecular adaptor activity	Gene Ontology	GO:0060090	3	52	0.255391	0.408967	DISC1	SLC9A3R1	WWC2	http://amigo.geneontology.org/amigo/term/GO:0060090
exocytosis	Gene Ontology	GO:0006887	3	52	0.255391	0.408967	RAB11B	EXOC3L4	SYTL2	http://amigo.geneontology.org/amigo/term/GO:0006887
positive regulation of protein kinase B signaling	Gene Ontology	GO:0051897	3	52	0.255391	0.408967	IL18	MST1R	BAG4	http://amigo.geneontology.org/amigo/term/GO:0051897
negative regulation of neuron apoptotic process	Gene Ontology	GO:0043524	4	77	0.25805	0.412974	CHL1	AMBRA1	XRCC2	STAMBP	http://amigo.geneontology.org/amigo/term/GO:0043524
toxin transport	Gene Ontology	GO:1901998	2	29	0.259534	0.414342	CCT2	ANTXR2	http://amigo.geneontology.org/amigo/term/GO:1901998
intrinsic apoptotic signaling pathway in response to DNA damage	Gene Ontology	GO:0008630	2	29	0.259534	0.414342	CRIP1	PRKDC	http://amigo.geneontology.org/amigo/term/GO:0008630
frizzled binding	Gene Ontology	GO:0005109	2	29	0.259534	0.414342	WNT5A	CCDC88C	http://amigo.geneontology.org/amigo/term/GO:0005109
cytoskeletal protein binding	Gene Ontology	GO:0008092	2	29	0.259534	0.414342	PACSIN3	FARP1	http://amigo.geneontology.org/amigo/term/GO:0008092
hematopoietic progenitor cell differentiation	Gene Ontology	GO:0002244	3	53	0.264031	0.415857	PRRC2C	PLEK	PTPRC	http://amigo.geneontology.org/amigo/term/GO:0002244
ubiquitin binding	Gene Ontology	GO:0043130	3	53	0.264031	0.415857	GGA3	UBXN7	VPS36	http://amigo.geneontology.org/amigo/term/GO:0043130
small-subunit processome	Gene Ontology	GO:0032040	2	30	0.271453	0.415857	DCAF13	MPHOSPH10	http://amigo.geneontology.org/amigo/term/GO:0032040
regulation of blood pressure	Gene Ontology	GO:0008217	2	30	0.271453	0.415857	DLL1	EDNRB	http://amigo.geneontology.org/amigo/term/GO:0008217
cis-Golgi network	Gene Ontology	GO:0005801	2	30	0.271453	0.415857	MPPE1	GOLGA5	http://amigo.geneontology.org/amigo/term/GO:0005801
hemopoiesis	Gene Ontology	GO:0030097	2	30	0.271453	0.415857	BRCA2	CRIP2	http://amigo.geneontology.org/amigo/term/GO:0030097
protein secretion	Gene Ontology	GO:0009306	2	30	0.271453	0.415857	SEL1L	FGG	http://amigo.geneontology.org/amigo/term/GO:0009306
endosome to lysosome transport	Gene Ontology	GO:0008333	2	30	0.271453	0.415857	FAM160A2	TGFBRAP1	http://amigo.geneontology.org/amigo/term/GO:0008333
endocytic recycling	Gene Ontology	GO:0032456	2	30	0.271453	0.415857	RAB11FIP3	DENND1B	http://amigo.geneontology.org/amigo/term/GO:0032456
intracellular signal transduction	Gene Ontology	GO:0035556	10	240	0.276126	0.415857	ICK	RPS6KA5	NLK	PRKAG2	MCF2L	TNS2	LCP2	LYN	STK38L	DGKE	http://amigo.geneontology.org/amigo/term/GO:0035556
positive regulation of macrophage differentiation	Gene Ontology	GO:0045651	1	9	0.276606	0.415857	RB1	http://amigo.geneontology.org/amigo/term/GO:0045651
exocyst localization	Gene Ontology	GO:0051601	1	9	0.276606	0.415857	EXOC3L4	http://amigo.geneontology.org/amigo/term/GO:0051601
plasma membrane repair	Gene Ontology	GO:0001778	1	9	0.276606	0.415857	MYH9	http://amigo.geneontology.org/amigo/term/GO:0001778
positive regulation of ubiquitin-dependent protein catabolic process	Gene Ontology	GO:2000060	1	9	0.276606	0.415857	DISC1	http://amigo.geneontology.org/amigo/term/GO:2000060
cellular response to interferon-beta	Gene Ontology	GO:0035458	1	9	0.276606	0.415857	PNPT1	http://amigo.geneontology.org/amigo/term/GO:0035458
lens morphogenesis in camera-type eye	Gene Ontology	GO:0002089	1	9	0.276606	0.415857	CTNNB1	http://amigo.geneontology.org/amigo/term/GO:0002089
aminoacyl-tRNA editing activity	Gene Ontology	GO:0002161	1	9	0.276606	0.415857	PRORSD1P	http://amigo.geneontology.org/amigo/term/GO:0002161
positive regulation of activated T cell proliferation	Gene Ontology	GO:0042104	1	9	0.276606	0.415857	IL18	http://amigo.geneontology.org/amigo/term/GO:0042104
regulation of JNK cascade	Gene Ontology	GO:0046328	1	9	0.276606	0.415857	COPS5	http://amigo.geneontology.org/amigo/term/GO:0046328
cardiac muscle hypertrophy in response to stress	Gene Ontology	GO:0014898	1	9	0.276606	0.415857	EZH2	http://amigo.geneontology.org/amigo/term/GO:0014898
phosphoric diester hydrolase activity	Gene Ontology	GO:0008081	1	9	0.276606	0.415857	SMPD1	http://amigo.geneontology.org/amigo/term/GO:0008081
apoptotic DNA fragmentation	Gene Ontology	GO:0006309	1	9	0.276606	0.415857	DNASE2B	http://amigo.geneontology.org/amigo/term/GO:0006309
WASH complex	Gene Ontology	GO:0071203	1	9	0.276606	0.415857	DNAJC13	http://amigo.geneontology.org/amigo/term/GO:0071203
extrinsic component of mitochondrial inner membrane	Gene Ontology	GO:0031314	1	9	0.276606	0.415857	COQ6	http://amigo.geneontology.org/amigo/term/GO:0031314
cardiac septum morphogenesis	Gene Ontology	GO:0060411	1	9	0.276606	0.415857	CHD7	http://amigo.geneontology.org/amigo/term/GO:0060411
negative regulation of interleukin-2 production	Gene Ontology	GO:0032703	1	9	0.276606	0.415857	TBX21	http://amigo.geneontology.org/amigo/term/GO:0032703
regulation of sodium ion transport	Gene Ontology	GO:0002028	1	9	0.276606	0.415857	TGFB1	http://amigo.geneontology.org/amigo/term/GO:0002028
retinoic acid receptor signaling pathway	Gene Ontology	GO:0048384	1	9	0.276606	0.415857	ACTN4	http://amigo.geneontology.org/amigo/term/GO:0048384
regulation of epithelial cell proliferation	Gene Ontology	GO:0050678	1	9	0.276606	0.415857	PRKDC	http://amigo.geneontology.org/amigo/term/GO:0050678
positive regulation of lipid biosynthetic process	Gene Ontology	GO:0046889	1	9	0.276606	0.415857	CCDC3	http://amigo.geneontology.org/amigo/term/GO:0046889
SAGA complex	Gene Ontology	GO:0000124	1	9	0.276606	0.415857	TADA1	http://amigo.geneontology.org/amigo/term/GO:0000124
secondary heart field specification	Gene Ontology	GO:0003139	1	9	0.276606	0.415857	WNT5A	http://amigo.geneontology.org/amigo/term/GO:0003139
glucose 6-phosphate metabolic process	Gene Ontology	GO:0051156	1	9	0.276606	0.415857	HK2	http://amigo.geneontology.org/amigo/term/GO:0051156
phosphatidate phosphatase activity	Gene Ontology	GO:0008195	1	9	0.276606	0.415857	LPIN1	http://amigo.geneontology.org/amigo/term/GO:0008195
thrombin-activated receptor signaling pathway	Gene Ontology	GO:0070493	1	9	0.276606	0.415857	PLEK	http://amigo.geneontology.org/amigo/term/GO:0070493
negative regulation of myotube differentiation	Gene Ontology	GO:0010832	1	9	0.276606	0.415857	PLPP7	http://amigo.geneontology.org/amigo/term/GO:0010832
vasculature development	Gene Ontology	GO:0001944	1	9	0.276606	0.415857	RECK	http://amigo.geneontology.org/amigo/term/GO:0001944
filopodium membrane	Gene Ontology	GO:0031527	1	9	0.276606	0.415857	ITGA3	http://amigo.geneontology.org/amigo/term/GO:0031527
negative regulation of multicellular organism growth	Gene Ontology	GO:0040015	1	9	0.276606	0.415857	ADRB1	http://amigo.geneontology.org/amigo/term/GO:0040015
SMN complex	Gene Ontology	GO:0032797	1	9	0.276606	0.415857	STRAP	http://amigo.geneontology.org/amigo/term/GO:0032797
hematopoietic stem cell differentiation	Gene Ontology	GO:0060218	1	9	0.276606	0.415857	CHD2	http://amigo.geneontology.org/amigo/term/GO:0060218
potassium:proton antiporter activity	Gene Ontology	GO:0015386	1	9	0.276606	0.415857	SLC9A9	http://amigo.geneontology.org/amigo/term/GO:0015386
snRNA 3'-end processing	Gene Ontology	GO:0034472	1	9	0.276606	0.415857	INTS6	http://amigo.geneontology.org/amigo/term/GO:0034472
positive regulation of extrinsic apoptotic signaling pathway via death domain receptors	Gene Ontology	GO:1902043	1	9	0.276606	0.415857	STK4	http://amigo.geneontology.org/amigo/term/GO:1902043
aorta morphogenesis	Gene Ontology	GO:0035909	1	9	0.276606	0.415857	CHD7	http://amigo.geneontology.org/amigo/term/GO:0035909
filopodium assembly	Gene Ontology	GO:0046847	1	9	0.276606	0.415857	FGD3	http://amigo.geneontology.org/amigo/term/GO:0046847
positive regulation of sprouting angiogenesis	Gene Ontology	GO:1903672	1	9	0.276606	0.415857	DLL1	http://amigo.geneontology.org/amigo/term/GO:1903672
positive regulation of mitotic metaphase/anaphase transition	Gene Ontology	GO:0045842	1	9	0.276606	0.415857	RB1	http://amigo.geneontology.org/amigo/term/GO:0045842
metalloendopeptidase inhibitor activity	Gene Ontology	GO:0008191	1	9	0.276606	0.415857	RECK	http://amigo.geneontology.org/amigo/term/GO:0008191
P granule	Gene Ontology	GO:0043186	1	9	0.276606	0.415857	CARHSP1	http://amigo.geneontology.org/amigo/term/GO:0043186
mitotic DNA replication checkpoint	Gene Ontology	GO:0033314	1	9	0.276606	0.415857	TOPBP1	http://amigo.geneontology.org/amigo/term/GO:0033314
regulation of cell adhesion mediated by integrin	Gene Ontology	GO:0033628	1	9	0.276606	0.415857	LYN	http://amigo.geneontology.org/amigo/term/GO:0033628
inhibitory synapse	Gene Ontology	GO:0060077	1	9	0.276606	0.415857	IGSF9	http://amigo.geneontology.org/amigo/term/GO:0060077
mechanosensitive ion channel activity	Gene Ontology	GO:0008381	1	9	0.276606	0.415857	TMC7	http://amigo.geneontology.org/amigo/term/GO:0008381
negative regulation of protein tyrosine kinase activity	Gene Ontology	GO:0061099	1	9	0.276606	0.415857	PTPRC	http://amigo.geneontology.org/amigo/term/GO:0061099
astral microtubule organization	Gene Ontology	GO:0030953	1	9	0.276606	0.415857	CLASP1	http://amigo.geneontology.org/amigo/term/GO:0030953
negative regulation of G protein-coupled receptor signaling pathway	Gene Ontology	GO:0045744	1	9	0.276606	0.415857	PLEK	http://amigo.geneontology.org/amigo/term/GO:0045744
cellular response to extracellular stimulus	Gene Ontology	GO:0031668	1	9	0.276606	0.415857	PTPRC	http://amigo.geneontology.org/amigo/term/GO:0031668
protein quality control for misfolded or incompletely synthesized proteins	Gene Ontology	GO:0006515	1	9	0.276606	0.415857	NGLY1	http://amigo.geneontology.org/amigo/term/GO:0006515
hormone metabolic process	Gene Ontology	GO:0042445	1	9	0.276606	0.415857	PTPN11	http://amigo.geneontology.org/amigo/term/GO:0042445
cell morphogenesis involved in neuron differentiation	Gene Ontology	GO:0048667	1	9	0.276606	0.415857	RB1	http://amigo.geneontology.org/amigo/term/GO:0048667
somatic hypermutation of immunoglobulin genes	Gene Ontology	GO:0016446	1	9	0.276606	0.415857	UNG	http://amigo.geneontology.org/amigo/term/GO:0016446
high voltage-gated calcium channel activity	Gene Ontology	GO:0008331	1	9	0.276606	0.415857	CACNB1	http://amigo.geneontology.org/amigo/term/GO:0008331
positive regulation of DNA-directed DNA polymerase activity	Gene Ontology	GO:1900264	1	9	0.276606	0.415857	RFC4	http://amigo.geneontology.org/amigo/term/GO:1900264
mitochondrial transport	Gene Ontology	GO:0006839	1	9	0.276606	0.415857	SLC25A30	http://amigo.geneontology.org/amigo/term/GO:0006839
regulation of actin cytoskeleton reorganization	Gene Ontology	GO:2000249	1	9	0.276606	0.415857	TGFB1	http://amigo.geneontology.org/amigo/term/GO:2000249
ATP-dependent microtubule motor activity, plus-end-directed	Gene Ontology	GO:0008574	1	9	0.276606	0.415857	KIF11	http://amigo.geneontology.org/amigo/term/GO:0008574
chromatin-mediated maintenance of transcription	Gene Ontology	GO:0048096	1	9	0.276606	0.415857	CTNNB1	http://amigo.geneontology.org/amigo/term/GO:0048096
glomerular filtration	Gene Ontology	GO:0003094	1	9	0.276606	0.415857	SULF1	http://amigo.geneontology.org/amigo/term/GO:0003094
regulation of proteasomal protein catabolic process	Gene Ontology	GO:0061136	1	9	0.276606	0.415857	RHBDF1	http://amigo.geneontology.org/amigo/term/GO:0061136
cellular amino acid metabolic process	Gene Ontology	GO:0006520	1	9	0.276606	0.415857	DDC	http://amigo.geneontology.org/amigo/term/GO:0006520
regulation of neuron migration	Gene Ontology	GO:2001222	1	9	0.276606	0.415857	PLXNB2	http://amigo.geneontology.org/amigo/term/GO:2001222
heart contraction	Gene Ontology	GO:0060047	1	9	0.276606	0.415857	SGCG	http://amigo.geneontology.org/amigo/term/GO:0060047
histone H4 deacetylation	Gene Ontology	GO:0070933	1	9	0.276606	0.415857	SMARCAD1	http://amigo.geneontology.org/amigo/term/GO:0070933
peptidyl-lysine monomethylation	Gene Ontology	GO:0018026	1	9	0.276606	0.415857	SETD2	http://amigo.geneontology.org/amigo/term/GO:0018026
SCAR complex	Gene Ontology	GO:0031209	1	9	0.276606	0.415857	ABI1	http://amigo.geneontology.org/amigo/term/GO:0031209
microtubule severing	Gene Ontology	GO:0051013	1	9	0.276606	0.415857	VPS4B	http://amigo.geneontology.org/amigo/term/GO:0051013
positive regulation of cytokine production involved in inflammatory response	Gene Ontology	GO:1900017	1	9	0.276606	0.415857	APPL1	http://amigo.geneontology.org/amigo/term/GO:1900017
I-kappaB phosphorylation	Gene Ontology	GO:0007252	1	9	0.276606	0.415857	DAB2IP	http://amigo.geneontology.org/amigo/term/GO:0007252
cytoskeletal anchor activity	Gene Ontology	GO:0008093	1	9	0.276606	0.415857	BAIAP2	http://amigo.geneontology.org/amigo/term/GO:0008093
unsaturated fatty acid biosynthetic process	Gene Ontology	GO:0006636	1	9	0.276606	0.415857	ELOVL1	http://amigo.geneontology.org/amigo/term/GO:0006636
clathrin-coated endocytic vesicle	Gene Ontology	GO:0045334	1	9	0.276606	0.415857	CLTCL1	http://amigo.geneontology.org/amigo/term/GO:0045334
mitochondrial DNA replication	Gene Ontology	GO:0006264	1	9	0.276606	0.415857	PRIMPOL	http://amigo.geneontology.org/amigo/term/GO:0006264
negative thymic T cell selection	Gene Ontology	GO:0045060	1	9	0.276606	0.415857	PTPRC	http://amigo.geneontology.org/amigo/term/GO:0045060
condensed nuclear chromosome, centromeric region	Gene Ontology	GO:0000780	1	9	0.276606	0.415857	ATRX	http://amigo.geneontology.org/amigo/term/GO:0000780
positive thymic T cell selection	Gene Ontology	GO:0045059	1	9	0.276606	0.415857	PTPRC	http://amigo.geneontology.org/amigo/term/GO:0045059
centrosome duplication	Gene Ontology	GO:0051298	1	9	0.276606	0.415857	BRCA2	http://amigo.geneontology.org/amigo/term/GO:0051298
negative regulation of ubiquitin protein ligase activity	Gene Ontology	GO:1904667	1	9	0.276606	0.415857	RPL11	http://amigo.geneontology.org/amigo/term/GO:1904667
positive regulation of cell adhesion mediated by integrin	Gene Ontology	GO:0033630	1	9	0.276606	0.415857	ADAM9	http://amigo.geneontology.org/amigo/term/GO:0033630
RNA methyltransferase activity	Gene Ontology	GO:0008173	1	9	0.276606	0.415857	METTL4	http://amigo.geneontology.org/amigo/term/GO:0008173
SREBP signaling pathway	Gene Ontology	GO:0032933	1	9	0.276606	0.415857	EIF2A	http://amigo.geneontology.org/amigo/term/GO:0032933
Bergmann glial cell differentiation	Gene Ontology	GO:0060020	1	9	0.276606	0.415857	PTPN11	http://amigo.geneontology.org/amigo/term/GO:0060020
transcription corepressor binding	Gene Ontology	GO:0001222	1	9	0.276606	0.415857	PER2	http://amigo.geneontology.org/amigo/term/GO:0001222
protein transmembrane transporter activity	Gene Ontology	GO:0008320	1	9	0.276606	0.415857	SEC61A2	http://amigo.geneontology.org/amigo/term/GO:0008320
ion channel activity	Gene Ontology	GO:0005216	1	9	0.276606	0.415857	TMEM266	http://amigo.geneontology.org/amigo/term/GO:0005216
kidney morphogenesis	Gene Ontology	GO:0060993	1	9	0.276606	0.415857	VANGL2	http://amigo.geneontology.org/amigo/term/GO:0060993
purine nucleotide biosynthetic process	Gene Ontology	GO:0006164	1	9	0.276606	0.415857	GART	http://amigo.geneontology.org/amigo/term/GO:0006164
microtubule associated complex	Gene Ontology	GO:0005875	1	9	0.276606	0.415857	FSD1	http://amigo.geneontology.org/amigo/term/GO:0005875
negative regulation of keratinocyte proliferation	Gene Ontology	GO:0010839	1	9	0.276606	0.415857	EFNB2	http://amigo.geneontology.org/amigo/term/GO:0010839
adult heart development	Gene Ontology	GO:0007512	1	9	0.276606	0.415857	CHD7	http://amigo.geneontology.org/amigo/term/GO:0007512
epidermal growth factor receptor signaling pathway	Gene Ontology	GO:0007173	2	31	0.283364	0.42432	PTPN11	CAMLG	http://amigo.geneontology.org/amigo/term/GO:0007173
protein-macromolecule adaptor activity	Gene Ontology	GO:0030674	2	31	0.283364	0.42432	DDB1	OPTN	http://amigo.geneontology.org/amigo/term/GO:0030674
cytoplasmic translation	Gene Ontology	GO:0002181	2	31	0.283364	0.42432	RPLP0	RPL11	http://amigo.geneontology.org/amigo/term/GO:0002181
negative regulation of protein kinase B signaling	Gene Ontology	GO:0051898	2	31	0.283364	0.42432	SIRT1	SLC9A3R1	http://amigo.geneontology.org/amigo/term/GO:0051898
autophagy	Gene Ontology	GO:0006914	2	31	0.283364	0.42432	AMBRA1	OPTN	http://amigo.geneontology.org/amigo/term/GO:0006914
hormone-mediated signaling pathway	Gene Ontology	GO:0009755	2	31	0.283364	0.42432	PTPN11	PPARD	http://amigo.geneontology.org/amigo/term/GO:0009755
transmembrane transporter activity	Gene Ontology	GO:0022857	4	81	0.286414	0.426164	SLC22A5	SLC13A2	SLC18B1	CNNM4	http://amigo.geneontology.org/amigo/term/GO:0022857
carbohydrate binding	Gene Ontology	GO:0030246	3	56	0.290139	0.426164	CLEC3B	SFTPA1	GUSB	http://amigo.geneontology.org/amigo/term/GO:0030246
protein dephosphorylation	Gene Ontology	GO:0006470	4	82	0.293577	0.426164	PPM1J	PTPRC	PPM1B	PPP4R1	http://amigo.geneontology.org/amigo/term/GO:0006470
collagen-containing extracellular matrix	Gene Ontology	GO:0062023	4	82	0.293577	0.426164	VWF	FGG	SERPINE2	COL12A1	http://amigo.geneontology.org/amigo/term/GO:0062023
circadian rhythm	Gene Ontology	GO:0007623	2	32	0.295256	0.426164	PER2	SETX	http://amigo.geneontology.org/amigo/term/GO:0007623
electron transport chain	Gene Ontology	GO:0022900	2	32	0.295256	0.426164	COX7A2	CYBA	http://amigo.geneontology.org/amigo/term/GO:0022900
negative regulation of fat cell differentiation	Gene Ontology	GO:0045599	2	32	0.295256	0.426164	SIRT1	WNT5A	http://amigo.geneontology.org/amigo/term/GO:0045599
neuron projection morphogenesis	Gene Ontology	GO:0048812	2	32	0.295256	0.426164	DAB2IP	MAP4K4	http://amigo.geneontology.org/amigo/term/GO:0048812
positive regulation of fat cell differentiation	Gene Ontology	GO:0045600	2	32	0.295256	0.426164	CCDC3	STK4	http://amigo.geneontology.org/amigo/term/GO:0045600
Golgi membrane	Gene Ontology	GO:0000139	8	190	0.297253	0.426164	COPZ1	GLIPR2	B3GALNT2	GLG1	SCYL3	RHBDF1	GOLGA5	PDCD10	http://amigo.geneontology.org/amigo/term/GO:0000139
microtubule-based movement	Gene Ontology	GO:0007018	3	57	0.298886	0.426164	DYNC1I2	KIF11	DYNC1LI2	http://amigo.geneontology.org/amigo/term/GO:0007018
trans-Golgi network transport vesicle	Gene Ontology	GO:0030140	1	10	0.29966	0.426164	SPG21	http://amigo.geneontology.org/amigo/term/GO:0030140
phospholipase A2 activity (consuming 1,2-dipalmitoylphosphatidylcholine)	Gene Ontology	GO:0102567	1	10	0.29966	0.426164	PLA2G2E	http://amigo.geneontology.org/amigo/term/GO:0102567
cAMP response element binding	Gene Ontology	GO:0035497	1	10	0.29966	0.426164	ATF2	http://amigo.geneontology.org/amigo/term/GO:0035497
filopodium tip	Gene Ontology	GO:0032433	1	10	0.29966	0.426164	ABI1	http://amigo.geneontology.org/amigo/term/GO:0032433
presynaptic active zone cytoplasmic component	Gene Ontology	GO:0098831	1	10	0.29966	0.426164	CTNNB1	http://amigo.geneontology.org/amigo/term/GO:0098831
cell proliferation in forebrain	Gene Ontology	GO:0021846	1	10	0.29966	0.426164	DISC1	http://amigo.geneontology.org/amigo/term/GO:0021846
cellular protein-containing complex assembly	Gene Ontology	GO:0034622	1	10	0.29966	0.426164	DNAJB14	http://amigo.geneontology.org/amigo/term/GO:0034622
nucleus organization	Gene Ontology	GO:0006997	1	10	0.29966	0.426164	VPS4B	http://amigo.geneontology.org/amigo/term/GO:0006997
phosphatidylinositol phosphate binding	Gene Ontology	GO:1901981	1	10	0.29966	0.426164	DENND1B	http://amigo.geneontology.org/amigo/term/GO:1901981
immune system process	Gene Ontology	GO:0002376	1	10	0.29966	0.426164	IRF1	http://amigo.geneontology.org/amigo/term/GO:0002376
DNA replication factor A complex	Gene Ontology	GO:0005662	1	10	0.29966	0.426164	PLRG1	http://amigo.geneontology.org/amigo/term/GO:0005662
positive regulation of exosomal secretion	Gene Ontology	GO:1903543	1	10	0.29966	0.426164	VPS4B	http://amigo.geneontology.org/amigo/term/GO:1903543
microtubule depolymerization	Gene Ontology	GO:0007019	1	10	0.29966	0.426164	STMN1	http://amigo.geneontology.org/amigo/term/GO:0007019
sodium ion import across plasma membrane	Gene Ontology	GO:0098719	1	10	0.29966	0.426164	SLC9A9	http://amigo.geneontology.org/amigo/term/GO:0098719
auditory receptor cell stereocilium organization	Gene Ontology	GO:0060088	1	10	0.29966	0.426164	SLC9A3R1	http://amigo.geneontology.org/amigo/term/GO:0060088
regulation of synapse organization	Gene Ontology	GO:0050807	1	10	0.29966	0.426164	IGSF9	http://amigo.geneontology.org/amigo/term/GO:0050807
aminoacyl-tRNA metabolism involved in translational fidelity	Gene Ontology	GO:0106074	1	10	0.29966	0.426164	PRORSD1P	http://amigo.geneontology.org/amigo/term/GO:0106074
positive regulation of histone acetylation	Gene Ontology	GO:0035066	1	10	0.29966	0.426164	TGFB1	http://amigo.geneontology.org/amigo/term/GO:0035066
synaptic vesicle transport	Gene Ontology	GO:0048489	1	10	0.29966	0.426164	CTNNB1	http://amigo.geneontology.org/amigo/term/GO:0048489
vasoconstriction	Gene Ontology	GO:0042310	1	10	0.29966	0.426164	EDNRB	http://amigo.geneontology.org/amigo/term/GO:0042310
regulation of cilium assembly	Gene Ontology	GO:1902017	1	10	0.29966	0.426164	VDAC3	http://amigo.geneontology.org/amigo/term/GO:1902017
cell-cell contact zone	Gene Ontology	GO:0044291	1	10	0.29966	0.426164	PKP4	http://amigo.geneontology.org/amigo/term/GO:0044291
negative regulation of focal adhesion assembly	Gene Ontology	GO:0051895	1	10	0.29966	0.426164	CORO1C	http://amigo.geneontology.org/amigo/term/GO:0051895
negative regulation of cell motility	Gene Ontology	GO:2000146	1	10	0.29966	0.426164	SLC9A3R1	http://amigo.geneontology.org/amigo/term/GO:2000146
regulation of phosphatidylinositol 3-kinase signaling	Gene Ontology	GO:0014066	1	10	0.29966	0.426164	PTPN13	http://amigo.geneontology.org/amigo/term/GO:0014066
negative regulation of endoplasmic reticulum stress-induced intrinsic apoptotic signaling pathway	Gene Ontology	GO:1902236	1	10	0.29966	0.426164	HERPUD1	http://amigo.geneontology.org/amigo/term/GO:1902236
macrophage differentiation	Gene Ontology	GO:0030225	1	10	0.29966	0.426164	SIRT1	http://amigo.geneontology.org/amigo/term/GO:0030225
regulation of gluconeogenesis	Gene Ontology	GO:0006111	1	10	0.29966	0.426164	OGT	http://amigo.geneontology.org/amigo/term/GO:0006111
inorganic anion exchanger activity	Gene Ontology	GO:0005452	1	10	0.29966	0.426164	SLC4A2	http://amigo.geneontology.org/amigo/term/GO:0005452
dystrophin-associated glycoprotein complex	Gene Ontology	GO:0016010	1	10	0.29966	0.426164	SNTB1	http://amigo.geneontology.org/amigo/term/GO:0016010
regulation of cellular senescence	Gene Ontology	GO:2000772	1	10	0.29966	0.426164	PNPT1	http://amigo.geneontology.org/amigo/term/GO:2000772
cellular response to fibroblast growth factor stimulus	Gene Ontology	GO:0044344	1	10	0.29966	0.426164	DLL4	http://amigo.geneontology.org/amigo/term/GO:0044344
endoplasmic reticulum-Golgi intermediate compartment membrane	Gene Ontology	GO:0033116	1	10	0.29966	0.426164	MPPE1	http://amigo.geneontology.org/amigo/term/GO:0033116
phosphatidylinositol-5-phosphate binding	Gene Ontology	GO:0010314	1	10	0.29966	0.426164	SESTD1	http://amigo.geneontology.org/amigo/term/GO:0010314
late endosome to vacuole transport via multivesicular body sorting pathway	Gene Ontology	GO:0032511	1	10	0.29966	0.426164	TMEM50B	http://amigo.geneontology.org/amigo/term/GO:0032511
peptide metabolic process	Gene Ontology	GO:0006518	1	10	0.29966	0.426164	THOP1	http://amigo.geneontology.org/amigo/term/GO:0006518
COPI vesicle coat	Gene Ontology	GO:0030126	1	10	0.29966	0.426164	COPZ1	http://amigo.geneontology.org/amigo/term/GO:0030126
positive regulation of transcription regulatory region DNA binding	Gene Ontology	GO:2000679	1	10	0.29966	0.426164	RB1	http://amigo.geneontology.org/amigo/term/GO:2000679
cellular response to organic substance	Gene Ontology	GO:0071310	1	10	0.29966	0.426164	TBX21	http://amigo.geneontology.org/amigo/term/GO:0071310
positive regulation of double-strand break repair via nonhomologous end joining	Gene Ontology	GO:2001034	1	10	0.29966	0.426164	PRKDC	http://amigo.geneontology.org/amigo/term/GO:2001034
protein refolding	Gene Ontology	GO:0042026	1	10	0.29966	0.426164	HSPA9	http://amigo.geneontology.org/amigo/term/GO:0042026
positive regulation of phosphorylation	Gene Ontology	GO:0042327	1	10	0.29966	0.426164	TGFB1	http://amigo.geneontology.org/amigo/term/GO:0042327
positive regulation of cell death	Gene Ontology	GO:0010942	1	10	0.29966	0.426164	PHB	http://amigo.geneontology.org/amigo/term/GO:0010942
steroid hormone receptor activity	Gene Ontology	GO:0003707	1	10	0.29966	0.426164	HNF4beta	http://amigo.geneontology.org/amigo/term/GO:0003707
microtubule minus-end binding	Gene Ontology	GO:0051011	1	10	0.29966	0.426164	TUBGCP5	http://amigo.geneontology.org/amigo/term/GO:0051011
vacuolar proton-transporting V-type ATPase complex	Gene Ontology	GO:0016471	1	10	0.29966	0.426164	ATP6V0A2	http://amigo.geneontology.org/amigo/term/GO:0016471
seminiferous tubule development	Gene Ontology	GO:0072520	1	10	0.29966	0.426164	ATRX	http://amigo.geneontology.org/amigo/term/GO:0072520
Prp19 complex	Gene Ontology	GO:0000974	1	10	0.29966	0.426164	PLRG1	http://amigo.geneontology.org/amigo/term/GO:0000974
regulation of protein kinase activity	Gene Ontology	GO:0045859	1	10	0.29966	0.426164	SLC9A3R1	http://amigo.geneontology.org/amigo/term/GO:0045859
Arp2/3 complex binding	Gene Ontology	GO:0071933	1	10	0.29966	0.426164	GMFB	http://amigo.geneontology.org/amigo/term/GO:0071933
AMP binding	Gene Ontology	GO:0016208	1	10	0.29966	0.426164	PRKAG2	http://amigo.geneontology.org/amigo/term/GO:0016208
muscle organ development	Gene Ontology	GO:0007517	1	10	0.29966	0.426164	CHD2	http://amigo.geneontology.org/amigo/term/GO:0007517
zinc ion transmembrane transport	Gene Ontology	GO:0071577	1	10	0.29966	0.426164	SLC39A3	http://amigo.geneontology.org/amigo/term/GO:0071577
phospholipase A2 activity consuming 1,2-dioleoylphosphatidylethanolamine)	Gene Ontology	GO:0102568	1	10	0.29966	0.426164	PLA2G2E	http://amigo.geneontology.org/amigo/term/GO:0102568
wound healing, spreading of cells	Gene Ontology	GO:0044319	1	10	0.29966	0.426164	PDCD10	http://amigo.geneontology.org/amigo/term/GO:0044319
glycerolipid metabolic process	Gene Ontology	GO:0046486	1	10	0.29966	0.426164	DGKE	http://amigo.geneontology.org/amigo/term/GO:0046486
vacuolar acidification	Gene Ontology	GO:0007035	1	10	0.29966	0.426164	ATP6V0A2	http://amigo.geneontology.org/amigo/term/GO:0007035
excitatory synapse	Gene Ontology	GO:0060076	1	10	0.29966	0.426164	ITGA3	http://amigo.geneontology.org/amigo/term/GO:0060076
neuronal cell body membrane	Gene Ontology	GO:0032809	1	10	0.29966	0.426164	DAB2IP	http://amigo.geneontology.org/amigo/term/GO:0032809
N-acyltransferase activity	Gene Ontology	GO:0016410	1	10	0.29966	0.426164	BAAT	http://amigo.geneontology.org/amigo/term/GO:0016410
digestive tract morphogenesis	Gene Ontology	GO:0048546	1	10	0.29966	0.426164	VANGL2	http://amigo.geneontology.org/amigo/term/GO:0048546
regulation of peptidyl-tyrosine phosphorylation	Gene Ontology	GO:0050730	1	10	0.29966	0.426164	ITGB2	http://amigo.geneontology.org/amigo/term/GO:0050730
positive regulation of proteolysis	Gene Ontology	GO:0045862	1	10	0.29966	0.426164	OGT	http://amigo.geneontology.org/amigo/term/GO:0045862
negative regulation of DNA damage response, signal transduction by p53 class mediator	Gene Ontology	GO:0043518	1	10	0.29966	0.426164	SIRT1	http://amigo.geneontology.org/amigo/term/GO:0043518
sodium:proton antiporter activity	Gene Ontology	GO:0015385	1	10	0.29966	0.426164	SLC9A9	http://amigo.geneontology.org/amigo/term/GO:0015385
npBAF complex	Gene Ontology	GO:0071564	1	10	0.29966	0.426164	SMARCC2	http://amigo.geneontology.org/amigo/term/GO:0071564
ceramide metabolic process	Gene Ontology	GO:0006672	1	10	0.29966	0.426164	ORMDL1	http://amigo.geneontology.org/amigo/term/GO:0006672
gamma-tubulin complex	Gene Ontology	GO:0000930	1	10	0.29966	0.426164	TUBGCP5	http://amigo.geneontology.org/amigo/term/GO:0000930
spindle pole centrosome	Gene Ontology	GO:0031616	1	10	0.29966	0.426164	NUBP2	http://amigo.geneontology.org/amigo/term/GO:0031616
nuclear migration	Gene Ontology	GO:0007097	1	10	0.29966	0.426164	SLC9A3R1	http://amigo.geneontology.org/amigo/term/GO:0007097
NADPH oxidase complex	Gene Ontology	GO:0043020	1	10	0.29966	0.426164	CYBA	http://amigo.geneontology.org/amigo/term/GO:0043020
skeletal muscle contraction	Gene Ontology	GO:0003009	1	10	0.29966	0.426164	TNNC1	http://amigo.geneontology.org/amigo/term/GO:0003009
oxidoreductase activity, acting on paired donors, with incorporation or reduction of molecular oxygen	Gene Ontology	GO:0016705	1	10	0.29966	0.426164	CYP4B7	http://amigo.geneontology.org/amigo/term/GO:0016705
Arp2/3 protein complex	Gene Ontology	GO:0005885	1	10	0.29966	0.426164	ARPC2	http://amigo.geneontology.org/amigo/term/GO:0005885
interleukin-1-mediated signaling pathway	Gene Ontology	GO:0070498	1	10	0.29966	0.426164	IL1R1	http://amigo.geneontology.org/amigo/term/GO:0070498
TRAPP complex	Gene Ontology	GO:0030008	1	10	0.29966	0.426164	TRAPPC5	http://amigo.geneontology.org/amigo/term/GO:0030008
synaptic transmission, GABAergic	Gene Ontology	GO:0051932	1	10	0.29966	0.426164	CLSTN3	http://amigo.geneontology.org/amigo/term/GO:0051932
mitogen-activated protein kinase kinase kinase binding	Gene Ontology	GO:0031435	1	10	0.29966	0.426164	DAB2IP	http://amigo.geneontology.org/amigo/term/GO:0031435
neuromuscular process controlling posture	Gene Ontology	GO:0050884	1	10	0.29966	0.426164	ADARB1	http://amigo.geneontology.org/amigo/term/GO:0050884
cell division	Gene Ontology	GO:0051301	4	83	0.300763	0.427502	TIPIN	RB1	CLASP1	NUF2	http://amigo.geneontology.org/amigo/term/GO:0051301
endosome organization	Gene Ontology	GO:0007032	2	33	0.307119	0.434893	FAM160A2	DNAJC13	http://amigo.geneontology.org/amigo/term/GO:0007032
[truncated: 721 more rows]
[truncated: 110 more columns]
