# Supplementary material for: Identification of SNPs Related to Salmonella Resistance in Chickens Using RNA-Seq and Integrated Bioinformatics Approach
Source: Genes (Basel). 2023 Jun 17;14(6):1283. doi: 10.3390/genes14061283 (PMC10297900; doi:10.3390/genes14061283)
Supplement: Supplementary file 1 [file genes-14-01283-s001.zip › Supplementary File 2.xlsx]

## Sheet: Boiler_HighImpactSNPs
Chr	Chr_location	DB_SNP ID	Ref Nucleotide	Mutated Nucleotide	SNP Nature	Impact	Gene
1	170604542	.	C	A	splice_donor_variant&intron_variant	HIGH	KPNA3
1	168519704	.	A	C	splice_acceptor_variant&intron_variant	HIGH	ENSGALG00000016969
1	34496064	.	T	A	splice_acceptor_variant&intron_variant	HIGH	ENSGALG00000009879
1	45500698	.	T	C	splice_donor_variant&intron_variant	HIGH	VEZT
1	69150836	.	A	C	splice_acceptor_variant&intron_variant	HIGH	PARVB
1	35369857	.	G	A	splice_donor_variant&intron_variant	HIGH	NUP107
1	48227549	.	A	T	stop_gained	HIGH	ENSGALG00000011796
1	54637517	.	G	A	splice_donor_variant&intron_variant	HIGH	NFYB
1	45419342	.	T	A	splice_acceptor_variant&intron_variant	HIGH	FGD6
1	131659523	.	G	T	splice_donor_variant&intron_variant	HIGH	TUBGCP5
1	186977993	.	C	T	splice_acceptor_variant&intron_variant	HIGH	PANX1
1	7263271	.	T	A	splice_donor_variant&intron_variant	HIGH	MCM10
1	157641571	.	C	T	stop_gained	HIGH	MZT1
1	27505	.	T	C	splice_donor_variant&intron_variant	HIGH	ENSGALG00000045540
1	37894378	.	T	A	stop_gained	HIGH	KRR1
1	191574287	.	C	A	splice_donor_variant&intron_variant	HIGH	SYTL2
1	219310	.	C	A	stop_gained	HIGH	CLC2DL3
1	23927024	.	G	A	splice_donor_variant&intron_variant	HIGH	ENSGALG00000036488
1	14288652	.	G	A	start_lost	HIGH	ENSGALG00000054032
1	33764182	.	T	C	splice_donor_variant&intron_variant	HIGH	TBK1
1	93917610	.	A	T	stop_gained	HIGH	PDZK1
1	174037828	.	C	T	stop_gained	HIGH	ENSGALG00000054231
1	135115204	.	T	G	splice_donor_variant&intron_variant	HIGH	IL1R1
1	135115203	.	G	A	splice_donor_variant&intron_variant	HIGH	IL1R1
1	61654647	.	T	C	stop_lost	HIGH	CECR1
1	84742533	.	A	G	splice_acceptor_variant&intron_variant	HIGH	F5
1	168519705	.	G	T	splice_acceptor_variant&intron_variant	HIGH	ENSGALG00000016969
1	33764181	.	G	A	splice_donor_variant&intron_variant	HIGH	TBK1
1	45285088	.	A	T	splice_acceptor_variant&intron_variant	HIGH	ENSGALG00000051437
1	242816	.	G	T	splice_acceptor_variant&intron_variant	HIGH	ENSGALG00000051297
1	145684245	.	G	A	stop_gained	HIGH	PCCA
1	121604143	.	G	A	splice_acceptor_variant&intron_variant	HIGH	SH3KBP1
1	49176932	.	G	A	splice_acceptor_variant&intron_variant	HIGH	ENSGALG00000019325
1	87717958	.	G	A	splice_donor_variant&intron_variant	HIGH	ALCAM
1	15122123	.	T	A	splice_donor_variant&intron_variant	HIGH	ERGIC2
1	45739654	.	A	C	splice_donor_variant&intron_variant	HIGH	LTA4H
1	79862782	.	G	C	stop_lost	HIGH	ENSGALG00000035228
1	123686313	.	C	T	splice_donor_variant&intron_variant	HIGH	ENSGALG00000050849
1	88748478	.	C	T	stop_gained	HIGH	IFT57
1	110935174	.	G	C	splice_donor_variant&intron_variant	HIGH	PKNOX1
1	80179071	.	C	G	splice_acceptor_variant&intron_variant	HIGH	ENSGALG00000032036
1	6852588	.	C	T	splice_donor_variant&intron_variant	HIGH	NUDT5
1	21884195	.	C	T	stop_gained	HIGH	POT1
1	125381180	.	C	T	splice_donor_variant&intron_variant	HIGH	MSL3
1	12699984	.	G	T	stop_gained	HIGH	RSBN1L
1	129991959	.	C	T	stop_gained	HIGH	ZBED1
1	88748833	.	A	G	start_lost	HIGH	IFT57
1	197383545	.	A	G	splice_donor_variant&intron_variant	HIGH	FAM160A2
1	177131425	.	C	G	splice_donor_variant&intron_variant	HIGH	POMP
1	20288471	.	G	T	splice_acceptor_variant&intron_variant	HIGH	MOV10L1
1	20570459	.	C	G	splice_donor_variant&intron_variant	HIGH	MAPK11
1	178448680	.	C	G	splice_acceptor_variant&intron_variant	HIGH	ENSGALG00000053206
1	22212466	.	C	G	splice_donor_variant&intron_variant	HIGH	ARL8BL
1	137652657	.	G	C	splice_acceptor_variant&intron_variant	HIGH	ENSGALG00000046960
1	31486	.	T	C	splice_donor_variant&intron_variant	HIGH	ENSGALG00000051297
1	57413870	.	G	A	splice_acceptor_variant&intron_variant	HIGH	CREB3L2
1	80043190	.	C	A	stop_gained	HIGH	USF3
1	57259625	.	T	C	start_lost	HIGH	AGK
1	20499866	.	T	C	splice_acceptor_variant&intron_variant	HIGH	HDAC10
1	1071045	.	C	G	stop_gained	HIGH	ENSGALG00000054297
1	49877235	.	G	A	splice_donor_variant&intron_variant	HIGH	ENSGALG00000046744
1	62155990	.	A	C	splice_donor_variant&intron_variant	HIGH	ENSGALG00000003466
1	137771327	.	G	T	stop_gained	HIGH	ENSGALG00000044260
1	75951506	.	T	C	splice_acceptor_variant&intron_variant	HIGH	ENSGALG00000048015
1	23572404	.	C	T	splice_acceptor_variant&intron_variant	HIGH	ING3
1	177131424	.	A	G	splice_donor_variant&intron_variant	HIGH	POMP
1	186228854	.	T	A	stop_gained	HIGH	CCDC82
1	155114302	.	G	A	stop_gained	HIGH	ENSGALG00000054730
1	80166927	.	C	A	stop_gained	HIGH	ENSGALG00000032036
1	123714498	.	C	A	stop_gained	HIGH	FANCB
1	1541792	.	T	G	splice_acceptor_variant&intron_variant	HIGH	ZC3HC1
1	1541791	.	G	A	splice_acceptor_variant&intron_variant	HIGH	ZC3HC1
1	106778225	.	C	T	splice_acceptor_variant&intron_variant	HIGH	DONSON
1	78016391	.	C	T	splice_donor_variant&intron_variant	HIGH	PHB2
1	78016390	.	A	C	splice_donor_variant&intron_variant	HIGH	PHB2
1	84731801	.	C	A	stop_gained	HIGH	F5
1	171262788	.	C	T	stop_gained	HIGH	RNASEH2B
1	106650388	.	G	A	splice_acceptor_variant&intron_variant	HIGH	IFNGR2
1	135193201	.	G	T	splice_acceptor_variant&intron_variant	HIGH	IL1RL1
1	95722280	.	G	A	stop_gained	HIGH	ENSGALG00000049771
1	137689851	.	G	A	splice_donor_variant&intron_variant	HIGH	ENSGALG00000052731
1	61839110	.	T	A	splice_acceptor_variant&intron_variant	HIGH	BID
1	84801764	.	G	C	splice_acceptor_variant&intron_variant	HIGH	CCDC181
1	934111	.	A	T	stop_gained	HIGH	ENSGALG00000047166
1	110902318	.	G	C	splice_donor_variant&intron_variant	HIGH	NDUFV3
1	106728345	.	T	A	splice_acceptor_variant&intron_variant	HIGH	GART
1	133690039	.	C	G	splice_acceptor_variant&intron_variant	HIGH	MGAT4A
1	49175677	.	A	G	splice_acceptor_variant&intron_variant	HIGH	ENSGALG00000019325
1	74614406	.	C	A	splice_donor_variant&intron_variant	HIGH	VWF
1	1114674	.	C	T	splice_donor_variant&intron_variant	HIGH	DENND6B
1	50789697	.	A	T	splice_acceptor_variant&intron_variant	HIGH	NPTXR
1	109298671	.	G	T	splice_donor_variant&intron_variant	HIGH	BRWD1
1	93288962	.	C	T	stop_gained	HIGH	ILDR2
1	49175082	.	G	T	splice_donor_variant&intron_variant	HIGH	ENSGALG00000019325
1	197405731	.	G	C	splice_donor_variant&intron_variant	HIGH	APBB1
1	135124519	.	T	A	splice_donor_variant&intron_variant	HIGH	IL1R1
1	68105586	.	G	A	splice_acceptor_variant&intron_variant	HIGH	STK38L
1	74613815	.	C	A	splice_acceptor_variant&intron_variant	HIGH	VWF
1	137722642	.	A	C	splice_acceptor_variant&intron_variant	HIGH	ENSGALG00000046960
1	74613816	.	T	A	splice_acceptor_variant&intron_variant	HIGH	VWF
1	135124518	.	G	A	splice_donor_variant&intron_variant	HIGH	IL1R1
1	197410214	.	G	C	splice_donor_variant&intron_variant	HIGH	APBB1
1	189123909	.	G	A	stop_gained	HIGH	NOX4
1	156439181	.	G	T	splice_acceptor_variant&intron_variant	HIGH	COMMD6
1	194794	.	T	C	stop_lost	HIGH	ENSGALG00000042611
1	80724020	.	G	A	stop_gained	HIGH	GPR156
1	144196438	.	A	G	splice_donor_variant&intron_variant	HIGH	ERCC5
1	144196439	.	T	A	splice_donor_variant&intron_variant	HIGH	ERCC5
1	51766827	.	A	T	splice_acceptor_variant&intron_variant	HIGH	MYH9
1	189039959	.	T	C	splice_acceptor_variant&intron_variant	HIGH	NOX4
1	54772791	.	C	T	splice_donor_variant&intron_variant	HIGH	STAB2
1	177367897	.	C	T	splice_donor_variant&intron_variant	HIGH	FLT3
1	39835717	.	G	T	splice_acceptor_variant&intron_variant	HIGH	RPS16
1	108002337	.	A	C	splice_acceptor_variant&intron_variant	HIGH	CHAF1B
1	141407466	.	A	T	stop_gained	HIGH	ENSGALG00000051579
1	163762305	.	C	T	stop_gained	HIGH	DIAPH3
1	93299227	.	G	A	stop_gained	HIGH	ENSGALG00000047821
1	28652979	.	C	T	stop_gained	HIGH	PNPLA8
1	187436709	.	A	G	splice_donor_variant&intron_variant	HIGH	SLC36A4
1	137782759	.	G	A	splice_acceptor_variant&intron_variant	HIGH	ENSGALG00000044260
1	124608919	.	A	G	splice_acceptor_variant&intron_variant	HIGH	ENSGALG00000049035
1	7459663	.	G	A	splice_acceptor_variant&intron_variant	HIGH	ENSGALG00000050213
1	124358012	.	A	T	stop_gained	HIGH	TCEANC
1	106420781	.	C	T	splice_donor_variant&intron_variant	HIGH	PAXBP1
1	169106673	.	C	G	splice_donor_variant&intron_variant	HIGH	SLC25A30
1	40508	.	G	A	stop_gained	HIGH	ENSGALG00000042023
1	103804430	.	A	G	splice_donor_variant&intron_variant	HIGH	MRPL39
1	138961642	.	C	A	stop_gained	HIGH	MCF2L
1	171735068	.	G	A	stop_gained	HIGH	VPS36
1	135187510	.	G	T	splice_acceptor_variant&intron_variant	HIGH	IL1RL1
1	105999463	.	A	T	splice_acceptor_variant&intron_variant	HIGH	SOD1
1	105348588	.	G	A	splice_acceptor_variant&intron_variant	HIGH	USP16
1	41925	.	C	A	stop_gained	HIGH	ENSGALG00000042023
1	832130	.	C	A	splice_acceptor_variant&intron_variant	HIGH	ENSGALG00000048328
1	54712508	.	C	A	splice_donor_variant&intron_variant	HIGH	HSP90B1
1	141407189	.	A	C	stop_gained	HIGH	ENSGALG00000051579
1	137716676	.	C	T	stop_gained	HIGH	ENSGALG00000045815
1	197417513	.	G	A	stop_gained	HIGH	TRIM3
1	300291	.	T	C	splice_donor_variant&intron_variant	HIGH	CLC2DL3
1	195028	.	C	T	stop_gained	HIGH	ENSGALG00000042611
1	302531	.	A	G	stop_lost	HIGH	CLC2DL3
1	169974653	.	C	G	splice_donor_variant&intron_variant	HIGH	SUCLA2
1	71320297	.	A	C	splice_acceptor_variant&intron_variant	HIGH	ENSGALG00000014551
1	190277977	.	G	T	stop_gained	HIGH	FAM181B
1	175898645	.	G	A	splice_acceptor_variant&intron_variant	HIGH	ENSGALG00000017072
1	155302866	.	G	C	splice_donor_variant&intron_variant	HIGH	EDNRB
1	16049189	.	G	A	stop_gained	HIGH	ENSGALG00000054287
1	176424390	.	C	G	splice_donor_variant&intron_variant	HIGH	ALOX5AP
1	219085	.	C	G	stop_gained	HIGH	CLC2DL3
1	137657011	.	T	C	stop_lost	HIGH	ENSGALG00000046960
2	111318492	.	C	T	splice_donor_variant&intron_variant	HIGH	SDR16C5
2	84491787	rs14212457	A	G	splice_donor_variant&intron_variant	HIGH	ENSGALG00000050319
2	15790783	.	T	C	splice_acceptor_variant&intron_variant	HIGH	RAB18
2	102922685	rs313569582	G	A	stop_gained	HIGH	CABLES1
2	125734557	.	G	T	splice_donor_variant&intron_variant	HIGH	ENSGALG00000046258
2	125734558	.	T	C	splice_donor_variant&intron_variant	HIGH	ENSGALG00000046258
2	64294321	rs315747941	A	G	start_lost	HIGH	BLOC1S5
2	23862669	.	A	T	splice_donor_variant&intron_variant	HIGH	PON1
2	19596629	.	C	T	splice_donor_variant&intron_variant	HIGH	MRC1
2	9700462	.	A	C	splice_donor_variant&intron_variant	HIGH	VIPR2
2	44591304	.	C	A	splice_donor_variant&intron_variant	HIGH	UBP1
2	44591303	.	A	G	splice_donor_variant&intron_variant	HIGH	UBP1
2	57837305	rs318026593	T	C	splice_donor_variant&intron_variant	HIGH	GPLD1
2	584002	rs737410802	C	T	stop_gained	HIGH	ZNF767
2	97333366	.	T	C	splice_donor_variant&intron_variant	HIGH	MPPE1
2	43041420	.	C	T	splice_donor_variant&intron_variant	HIGH	CLEC3B
2	46169636	rs737927696	G	A	splice_acceptor_variant&intron_variant	HIGH	ENSGALG00000029256
2	28334978	.	G	A	stop_gained	HIGH	CRPPA
2	4434902	.	A	T	splice_donor_variant&intron_variant	HIGH	GARS
2	9700463	.	C	A	splice_donor_variant&intron_variant	HIGH	VIPR2
2	889591	rs315352221	A	G	stop_lost&splice_region_variant	HIGH	SMARCC1
2	113365845	.	C	G	splice_donor_variant&intron_variant	HIGH	ENSGALG00000047461
2	48887190	rs739662587	G	A	stop_gained	HIGH	GOLGA4
2	55329989	rs741744087	T	C	start_lost	HIGH	ENSGALG00000035050
2	23862670	.	C	T	splice_donor_variant&intron_variant	HIGH	PON1
2	45985294	.	C	A	splice_donor_variant&intron_variant	HIGH	STARD3NL
2	43400892	.	G	C	splice_donor_variant&intron_variant	HIGH	CTNNB1
2	116745009	.	A	C	splice_donor_variant&intron_variant	HIGH	TRAM1L1
2	44651718	.	T	C	splice_acceptor_variant&intron_variant	HIGH	CLASP2
2	112087043	.	C	T	splice_donor_variant&intron_variant	HIGH	NSMAF
2	37863077	.	A	G	stop_lost	HIGH	NGLY1
2	115262037	.	G	C	splice_donor_variant&intron_variant	HIGH	SGK3
2	118112379	.	C	A	splice_acceptor_variant&intron_variant	HIGH	JPH1
2	47279061	.	G	A	splice_donor_variant&intron_variant	HIGH	ENSGALG00000038978
2	11490781	.	C	T	splice_acceptor_variant&intron_variant	HIGH	PITRM1
2	16090626	.	G	C	splice_acceptor_variant&splice_donor_variant&intron_variant	HIGH	ABI1
2	91848799	rs739230176	G	T	stop_gained	HIGH	CNDP2
2	65685382	rs1058615773	G	A	stop_gained	HIGH	ENSGALG00000012808
2	602226	.	C	T	stop_gained	HIGH	ENSGALG00000023632
2	149657442	.	G	T	splice_acceptor_variant&intron_variant	HIGH	ENSGALG00000036635
2	115620606	rs1059135245	T	A	stop_gained	HIGH	PREX2
2	329449	.	T	C	splice_donor_variant&intron_variant	HIGH	CDK5
2	91848730	rs312558589	T	A	stop_lost	HIGH	CNDP2
2	80756047	rs315381192	G	A	stop_gained	HIGH	DDC
2	126174656	rs317015479	A	G	start_lost	HIGH	DPY19L4
2	14688223	.	A	G	splice_donor_variant&intron_variant	HIGH	SVIL
2	149655879	.	A	C	splice_donor_variant&intron_variant	HIGH	ENSGALG00000036635
2	78294863	.	C	T	splice_donor_variant&intron_variant	HIGH	MARCHF6
2	58306866	rs794574498	G	A	splice_donor_variant&intron_variant	HIGH	ENSGALG00000052119
2	62567783	rs312563578	C	T	splice_donor_variant&intron_variant	HIGH	ENSGALG00000048804
2	124486509	rs732540379	C	T	splice_donor_variant&intron_variant	HIGH	ENSGALG00000053987
2	7759727	.	G	A	stop_gained	HIGH	PAXIP1
2	19653768	rs738658969	G	A	splice_donor_variant&intron_variant	HIGH	STAM
2	46169540	rs315912129	A	G	splice_donor_variant&intron_variant	HIGH	ENSGALG00000029256
2	57854275	rs734028174	A	G	splice_donor_variant&intron_variant	HIGH	MRS2
2	99636435	.	C	T	splice_acceptor_variant&intron_variant	HIGH	ARHGAP28
2	31599592	rs314689172	G	T	stop_gained	HIGH	MPP6
2	37881728	rs738365431	G	C	splice_donor_variant&intron_variant	HIGH	OXSM
2	126728860	.	A	T	splice_donor_variant&intron_variant	HIGH	MTERF3
2	101207611	rs15134701	G	T	stop_gained	HIGH	METTL4
2	20426944	.	G	A	splice_donor_variant&intron_variant	HIGH	ITGA8
2	23855892	.	C	T	splice_donor_variant&intron_variant	HIGH	PON1
2	141680586	rs740549041	T	G	splice_acceptor_variant&intron_variant	HIGH	TMEM71
2	67588553	rs1059280856	G	T	stop_gained	HIGH	WRNIP1
2	130889503	.	C	T	splice_acceptor_variant&intron_variant	HIGH	BOP1
2	56030152	.	G	A	splice_acceptor_variant&intron_variant	HIGH	RECK
2	145694499	rs316550187	C	T	splice_acceptor_variant&intron_variant	HIGH	ENSGALG00000053310
2	54286042	.	C	T	splice_donor_variant&intron_variant	HIGH	EZH2
2	101190776	rs312818153	C	T	splice_acceptor_variant&intron_variant	HIGH	NDC80
2	44642483	.	A	C	splice_donor_variant&intron_variant	HIGH	CLASP2
2	44642484	.	C	T	splice_donor_variant&intron_variant	HIGH	CLASP2
2	54272299	.	G	C	splice_acceptor_variant&intron_variant	HIGH	CUL1
2	124306208	rs739350907	A	T	stop_lost	HIGH	DECR1
2	49816608	rs315252947	C	A	stop_gained	HIGH	YAE1
2	42593845	.	G	T	splice_donor_variant&intron_variant	HIGH	TOPBP1
2	64629796	.	T	A	splice_donor_variant&intron_variant	HIGH	SSR1
2	64629795	.	G	A	splice_donor_variant&intron_variant	HIGH	SSR1
2	35780032	.	G	C	splice_acceptor_variant&intron_variant	HIGH	RAB5A
2	135512824	.	C	A	stop_gained	HIGH	UTP23
2	2048822	.	A	T	stop_gained	HIGH	NKTR
2	75642966	.	G	A	splice_acceptor_variant&intron_variant	HIGH	ENSGALG00000036466
2	37792152	.	C	T	splice_donor_variant&intron_variant	HIGH	TOP2B
2	122618290	rs316005974	C	T	splice_acceptor_variant&intron_variant	HIGH	RBIS
2	14544617	rs317811010	G	A	splice_acceptor_variant&intron_variant	HIGH	ENSGALG00000048340
2	341474	.	G	A	stop_gained	HIGH	ABCB8
2	46920470	.	C	G	splice_donor_variant&intron_variant	HIGH	2021-09-07
2	46920472	.	C	G	splice_donor_variant&intron_variant	HIGH	2021-09-07
2	136545783	.	T	C	splice_acceptor_variant&intron_variant	HIGH	ENPP2
2	15932536	.	A	G	splice_donor_variant&intron_variant	HIGH	YME1L1
2	15932537	.	C	A	splice_donor_variant&intron_variant	HIGH	YME1L1
2	107919967	.	A	T	splice_donor_variant&intron_variant	HIGH	PRKDC
2	8747793	.	G	C	splice_donor_variant&intron_variant	HIGH	DNAJB6
2	6426631	.	A	G	splice_donor_variant&intron_variant	HIGH	PRKAG2
2	63267617	.	G	A	stop_gained	HIGH	GCNT2
2	46228213	rs316520852	G	A	splice_acceptor_variant&intron_variant	HIGH	ENSGALG00000046643
2	88548324	rs315063876	C	T	stop_gained	HIGH	CTNNAL1
2	65946281	.	A	G	splice_donor_variant&intron_variant	HIGH	PRPF4B
2	130667002	.	C	T	stop_gained	HIGH	MAF1
2	130667003	.	C	T	stop_gained	HIGH	MAF1
2	115701008	.	C	G	splice_donor_variant&intron_variant	HIGH	PREX2
2	90579230	rs732585926	G	A	stop_gained	HIGH	ZNF236
2	116745010	.	C	T	splice_donor_variant&intron_variant	HIGH	TRAM1L1
2	986660	rs735893292	T	C	splice_acceptor_variant&intron_variant	HIGH	ENSGALG00000038522
3	31204305	.	T	A	splice_acceptor_variant&intron_variant	HIGH	RASGRP3
3	104499531	.	G	C	splice_donor_variant&intron_variant	HIGH	ENSGALG00000016524
3	63229161	.	T	C	splice_donor_variant&intron_variant	HIGH	DCBLD1
3	76865926	.	G	T	splice_donor_variant&intron_variant	HIGH	ENSGALG00000052055
3	4541672	.	T	A	splice_acceptor_variant&intron_variant	HIGH	ESF1
3	10138004	.	T	G	splice_donor_variant&intron_variant	HIGH	MDH1
3	27553090	.	C	T	splice_donor_variant&intron_variant	HIGH	BRE
3	10140375	.	G	A	splice_donor_variant&intron_variant	HIGH	MDH1
3	253094	.	A	C	start_lost	HIGH	PNPT1
3	27906657	.	C	G	splice_donor_variant&intron_variant	HIGH	SLC4A1AP
3	39023963	.	T	C	splice_donor_variant&intron_variant	HIGH	PCNX2
3	21136982	.	G	A	stop_gained	HIGH	CENPF
3	45688846	.	T	G	splice_acceptor_variant&intron_variant	HIGH	MRPL18
3	33615619	.	G	T	stop_gained&splice_region_variant	HIGH	SULT6B1
3	32165691	.	G	A	splice_acceptor_variant&intron_variant	HIGH	HEATR5B
3	4555810	.	G	T	splice_donor_variant&intron_variant	HIGH	ENSGALG00000029333
3	99604777	.	A	G	splice_donor_variant&intron_variant	HIGH	FAM49A
3	57390358	.	G	A	splice_donor_variant&intron_variant	HIGH	MED23
3	95298635	.	T	C	splice_donor_variant&intron_variant	HIGH	ENSGALG00000054743
3	96940074	.	A	G	splice_donor_variant&intron_variant	HIGH	PDIA6
3	40551935	.	C	G	splice_donor_variant&intron_variant	HIGH	AGT
3	48296394	.	T	G	splice_acceptor_variant&intron_variant	HIGH	LATS1
3	67465173	.	C	A	splice_donor_variant&intron_variant	HIGH	ENSGALG00000052255
3	104447341	.	A	C	splice_acceptor_variant&intron_variant	HIGH	TMEM214
3	46125585	.	A	T	stop_gained	HIGH	UTRN
3	99604778	.	C	T	splice_donor_variant&intron_variant	HIGH	FAM49A
3	46721676	.	G	A	stop_gained	HIGH	SHPRH
3	17511627	.	A	G	splice_acceptor_variant&intron_variant	HIGH	LBR
3	108770847	.	G	T	stop_lost	HIGH	RHAG
3	16134577	.	A	G	start_lost	HIGH	ENSGALG00000049318
3	16134578	.	T	C	start_lost	HIGH	ENSGALG00000049318
3	26744674	.	T	A	splice_donor_variant&intron_variant	HIGH	EPAS1
3	88276114	.	G	A	splice_donor_variant&intron_variant	HIGH	ELOVL5
3	48095093	.	T	C	splice_donor_variant&intron_variant	HIGH	ENSGALG00000031045
3	48095092	.	G	C	splice_donor_variant&intron_variant	HIGH	ENSGALG00000031045
3	33716944	.	C	A	splice_donor_variant&intron_variant	HIGH	SLC30A6
3	87022230	.	A	T	stop_gained	HIGH	ENSGALG00000047909
3	38142008	.	T	A	splice_donor_variant&intron_variant	HIGH	B3GALNT2
3	61387917	.	C	T	splice_acceptor_variant&intron_variant	HIGH	HSF2
3	104813963	.	C	T	splice_donor_variant&intron_variant	HIGH	ASXL2
3	87293581	.	T	A	splice_donor_variant&intron_variant	HIGH	ENSGALG00000051085
3	8152085	.	T	G	splice_acceptor_variant&intron_variant	HIGH	ENSGALG00000032863
3	87293580	.	G	A	splice_donor_variant&intron_variant	HIGH	ENSGALG00000051085
3	82411935	.	T	C	splice_donor_variant&intron_variant	HIGH	ENSGALG00000053388
3	105208311	.	A	G	stop_lost&splice_region_variant	HIGH	ENSGALG00000047993
3	88345158	.	G	A	stop_gained&splice_region_variant	HIGH	ICK
3	77673877	.	T	G	splice_donor_variant&intron_variant	HIGH	SNAP91
3	104526745	.	C	G	splice_donor_variant&intron_variant	HIGH	ENSGALG00000042005
3	77673876	.	G	T	splice_donor_variant&intron_variant	HIGH	SNAP91
3	104196144	.	A	T	stop_gained	HIGH	TP53I3
3	104526748	.	G	A	splice_donor_variant&intron_variant	HIGH	ENSGALG00000042005
3	48250172	.	T	G	splice_donor_variant&intron_variant	HIGH	GINM1
3	42630516	.	G	A	splice_donor_variant&intron_variant	HIGH	RNASET2
3	77973329	.	A	C	splice_donor_variant&intron_variant	HIGH	DOP1A
3	22938978	.	A	T	splice_donor_variant&intron_variant	HIGH	DIEXF
3	42945405	.	G	C	splice_donor_variant&intron_variant	HIGH	MPC1L
3	42945406	.	T	A	splice_donor_variant&intron_variant	HIGH	MPC1L
3	38360592	.	G	A	splice_acceptor_variant&intron_variant	HIGH	ENSGALG00000052212
3	22938979	.	C	A	splice_donor_variant&intron_variant	HIGH	DIEXF
3	38547105	.	G	T	splice_acceptor_variant&intron_variant	HIGH	TARBP1
3	21834425	.	T	A	splice_donor_variant&intron_variant	HIGH	ANGEL2
3	49468759	.	C	T	stop_gained	HIGH	ENSGALG00000013505
3	38284798	.	G	C	splice_acceptor_variant&intron_variant	HIGH	ENSGALG00000048698
3	72823219	.	G	T	stop_gained	HIGH	UFL1
3	62787699	.	G	A	splice_donor_variant&intron_variant	HIGH	FAM184A
3	80582856	.	T	C	splice_acceptor_variant&intron_variant	HIGH	SENP6
3	75654370	.	C	T	stop_gained	HIGH	RRAGD
3	37824819	.	A	T	splice_donor_variant&intron_variant	HIGH	LGALS8
3	16137101	.	T	G	splice_acceptor_variant&intron_variant	HIGH	PEX6
3	15520142	.	C	T	splice_donor_variant&intron_variant	HIGH	BIRC5
3	38159161	.	C	G	splice_donor_variant&intron_variant	HIGH	ENSGALG00000013950
3	37909870	.	C	T	splice_acceptor_variant&intron_variant	HIGH	GPR137B
3	40789484	.	T	C	splice_donor_variant&intron_variant	HIGH	PDCD2
3	10390193	.	A	G	splice_donor_variant&intron_variant	HIGH	ENSGALG00000047433
3	15684657	.	G	T	stop_lost&splice_region_variant	HIGH	CST3
3	48099250	.	A	G	splice_acceptor_variant&intron_variant	HIGH	ENSGALG00000031045
3	38292312	.	G	T	splice_acceptor_variant&intron_variant	HIGH	TOMM20
3	12691640	.	C	T	splice_donor_variant&intron_variant	HIGH	NDUFAF5
3	51759953	.	C	G	stop_gained	HIGH	ZDHHC14
3	66311278	.	A	G	splice_donor_variant&intron_variant	HIGH	RPF2
3	4441727	.	G	A	splice_acceptor_variant&intron_variant	HIGH	ENSGALG00000038972
3	45513548	.	G	T	splice_acceptor_variant&intron_variant	HIGH	ENSGALG00000004293
4	60695931	.	G	T	stop_lost	HIGH	BANK1
4	60695932	.	A	G	stop_lost	HIGH	BANK1
4	80867582	.	G	A	splice_acceptor_variant&intron_variant	HIGH	HTRA3
4	13919748	rs314466266	T	C	splice_acceptor_variant&intron_variant	HIGH	ENSGALG00000008141
4	62767586	.	G	A	splice_acceptor_variant&intron_variant	HIGH	ENSGALG00000013590
4	16523773	.	T	G	splice_donor_variant&intron_variant	HIGH	2021-09-06
4	39823495	rs314408259	C	T	splice_donor_variant&intron_variant	HIGH	ING2
4	76655651	rs318161801	T	C	start_lost	HIGH	FBXL5
4	11365948	.	C	G	splice_donor_variant&intron_variant	HIGH	ENSGALG00000007546
4	11365947	.	A	G	splice_donor_variant&intron_variant	HIGH	ENSGALG00000007546
4	17694030	.	T	G	splice_donor_variant&intron_variant	HIGH	ENSGALG00000009075
4	85388068	rs315320175	G	T	stop_gained	HIGH	ST3GAL5
4	73660539	rs15617367	T	A	stop_gained	HIGH	CCDC149
4	85755035	rs732437336	A	G	start_lost	HIGH	ENSGALG00000045876
4	66765569	rs735452389	C	T	stop_gained	HIGH	ATP10D
4	69811430	.	A	C	splice_acceptor_variant&intron_variant	HIGH	PGM2
4	69811429	.	C	G	splice_acceptor_variant&intron_variant	HIGH	PGM2
4	67594197	.	C	G	splice_donor_variant&intron_variant	HIGH	GNPDA2
4	66793520	.	A	T	splice_donor_variant&intron_variant	HIGH	ATP10D
4	42244810	.	A	T	stop_gained	HIGH	NEIL3
4	30602980	.	C	A	splice_donor_variant&intron_variant	HIGH	SMARCA5
4	5112448	rs732284136	C	T	stop_gained	HIGH	ATP11C
4	11205210	.	A	G	splice_donor_variant&intron_variant	HIGH	ENSGALG00000037816
4	75879773	rs731653134	A	T	stop_gained	HIGH	ENSGALG00000054173
4	8686382	.	T	G	splice_acceptor_variant&intron_variant	HIGH	ZNF711
4	8686381	.	C	A	splice_acceptor_variant&intron_variant	HIGH	ZNF711
4	12825957	.	A	T	splice_donor_variant&intron_variant	HIGH	ATRX
4	49270445	rs314339949	A	G	splice_donor_variant&intron_variant	HIGH	ENSGALG00000053080
4	24972294	rs732142552	C	T	stop_gained	HIGH	DDX60
4	82256037	.	T	C	splice_donor_variant&intron_variant	HIGH	NOP14
4	82256036	.	G	A	splice_donor_variant&intron_variant	HIGH	NOP14
4	17698885	rs16370633	C	T	stop_gained	HIGH	ENSGALG00000009075
4	24984623	.	A	T	splice_donor_variant&intron_variant	HIGH	DDX60
4	24984624	.	C	T	splice_donor_variant&intron_variant	HIGH	DDX60
4	88446529	.	C	T	splice_donor_variant&intron_variant	HIGH	SMOX
4	49182666	.	A	G	splice_donor_variant&intron_variant	HIGH	POLR2B
4	85603832	rs737331152	C	T	splice_acceptor_variant&intron_variant	HIGH	ENSGALG00000015805
4	49253653	.	G	C	splice_donor_variant&intron_variant	HIGH	SRP72
4	10993675	rs13643621	C	T	splice_acceptor_variant&intron_variant	HIGH	ENSGALG00000023692
4	16612473	.	C	A	splice_donor_variant&intron_variant	HIGH	PGRMC1
4	90974834	.	A	T	stop_gained	HIGH	ENSGALG00000054913
4	63139574	.	C	T	splice_donor_variant&intron_variant	HIGH	VPS37A
4	38748579	rs317689160	C	T	splice_acceptor_variant&intron_variant	HIGH	ENSGALG00000053686
4	85994964	.	G	C	splice_acceptor_variant&intron_variant	HIGH	THNSL2
4	2393075	rs731198113	A	T	splice_acceptor_variant&intron_variant	HIGH	IL2RG
4	1237586	.	G	A	stop_gained	HIGH	INPPL1
4	49237324	.	C	A	splice_donor_variant&intron_variant	HIGH	SARAF
4	81853000	.	G	A	splice_donor_variant&intron_variant	HIGH	LRPAP1
4	49270564	.	G	A	splice_acceptor_variant&intron_variant	HIGH	ENSGALG00000053080
4	79730837	.	T	G	splice_donor_variant&intron_variant	HIGH	MAN2B2
4	62991994	.	G	A	splice_acceptor_variant&intron_variant	HIGH	MTUS1
4	39546851	.	A	G	splice_acceptor_variant&intron_variant	HIGH	IRF2
4	62816530	.	A	G	splice_donor_variant&intron_variant	HIGH	PCM1
4	16499755	.	G	A	splice_acceptor_variant&intron_variant	HIGH	UPF3B
4	91130621	.	C	A	splice_acceptor_variant&intron_variant	HIGH	CDC25B
4	85818681	.	C	T	stop_gained	HIGH	ENSGALG00000048858
4	2364823	.	C	T	splice_acceptor_variant&intron_variant	HIGH	MED12
4	83181241	.	C	T	stop_gained	HIGH	NELFA
4	5029359	.	T	C	splice_acceptor_variant&intron_variant	HIGH	MCF2
4	66572586	rs315327191	C	T	splice_acceptor_variant&intron_variant	HIGH	NIPAL1
4	12922363	.	G	T	stop_gained&splice_region_variant	HIGH	ATP7A
4	20910903	.	T	A	stop_gained	HIGH	CTSO
4	1368894	rs740783990	C	A	stop_gained	HIGH	ENSGALG00000004127
4	75876885	rs317817652	C	T	stop_gained	HIGH	ENSGALG00000051383
4	39483720	rs14455692	G	A	splice_donor_variant&intron_variant	HIGH	PRIMPOL
4	2204396	.	A	T	splice_donor_variant&intron_variant	HIGH	OGT
4	29645711	.	T	G	splice_acceptor_variant&intron_variant	HIGH	CLGN
4	60225597	.	C	T,G	splice_donor_variant&intron_variant	HIGH	ENSGALG00000046550
4	69352510	.	G	C	splice_acceptor_variant&intron_variant	HIGH	RFC1
4	85858859	.	C	T	stop_gained	HIGH	ENSGALG00000048382
4	39782742	.	T	A	splice_donor_variant&intron_variant	HIGH	RWDD4
4	39782741	.	G	C	splice_donor_variant&intron_variant	HIGH	RWDD4
4	73501778	.	A	T	splice_donor_variant&intron_variant	HIGH	ZCCHC4
4	2204397	.	C	T	splice_donor_variant&intron_variant	HIGH	OGT
4	34054846	.	G	A	stop_gained	HIGH	CDKL2
4	73501779	.	C	A	splice_donor_variant&intron_variant	HIGH	ZCCHC4
4	1559722	rs1057543851	A	G	splice_donor_variant&intron_variant	HIGH	SLC25A14
4	60955431	rs318208644	C	T	stop_gained	HIGH	ENSGALG00000012319
4	84748621	.	G	A	splice_donor_variant&intron_variant	HIGH	CTBP1
4	85795996	.	C	T	stop_gained	HIGH	ENSGALG00000053568
4	37959506	rs740924045	C	A	stop_lost	HIGH	CYP2U1
5	18176337	rs731846949	C	T	splice_acceptor_variant&intron_variant	HIGH	ENSGALG00000049105
5	58077278	.	A	G	splice_donor_variant&intron_variant	HIGH	NIN
5	19644815	.	A	G	splice_donor_variant&intron_variant	HIGH	COMMD9
5	264725	.	G	A	splice_donor_variant&intron_variant	HIGH	ZP1
5	19644816	.	C	T	splice_donor_variant&intron_variant	HIGH	COMMD9
5	5241429	.	T	C	splice_donor_variant&intron_variant	HIGH	DNAJC24
5	50520921	rs15727685	A	G	splice_acceptor_variant&intron_variant	HIGH	CKB
5	57817025	.	G	A	splice_acceptor_variant&intron_variant	HIGH	KLHDC2
5	17047050	.	G	C	splice_donor_variant&intron_variant	HIGH	LPXN
5	45614564	.	G	T	splice_donor_variant&intron_variant	HIGH	DDX24
5	24458662	.	T	G	splice_donor_variant&intron_variant	HIGH	ZFYVE19
5	693870	rs80746431	G	A	stop_gained	HIGH	GATD1
5	17795486	rs317606859	C	G	splice_donor_variant&intron_variant	HIGH	ORAOV1
5	57863923	rs314709966	G	A	stop_gained	HIGH	ENSGALG00000051460
5	13322671	.	G	T	splice_donor_variant&intron_variant	HIGH	NAP1L4
5	23690831	rs739895758	G	A	splice_donor_variant&intron_variant	HIGH	ARHGAP1
5	9142316	rs313581108	C	G	splice_acceptor_variant&intron_variant	HIGH	MRVI1
5	1832261	.	C	T	stop_gained	HIGH	PGGHG
5	50764387	rs734802623	C	A	splice_donor_variant&intron_variant	HIGH	C14orf2
5	1833359	rs731796448	C	T	stop_gained	HIGH	PGGHG
5	57957935	.	C	T	splice_donor_variant&intron_variant	HIGH	MAP4K5
5	58373791	.	G	A	splice_donor_variant&intron_variant	HIGH	PSMC6
5	58283474	rs740899346	C	T	splice_acceptor_variant&intron_variant	HIGH	ENSGALG00000047585
5	38320531	rs731249676	G	T	stop_gained	HIGH	RPS6KL1
5	30238372	rs14529587	C	T	stop_gained	HIGH	KATNBL1
5	25834379	.	A	G	splice_donor_variant&intron_variant	HIGH	TMEM87A
5	14312753	rs735734691	A	G	splice_acceptor_variant&intron_variant	HIGH	ENSGALG00000006608
5	641050	.	G	C	splice_donor_variant&intron_variant	HIGH	ENSGALG00000030153
5	44463713	.	C	T	splice_donor_variant&intron_variant	HIGH	CCDC88C
5	24756646	rs739682011	T	C	start_lost	HIGH	EXD1
5	58283475	.	A	C	splice_acceptor_variant&intron_variant	HIGH	ENSGALG00000047585
5	30262539	rs15694440	G	A	splice_donor_variant&intron_variant	HIGH	ENSGALG00000027520
5	58251879	rs738581093	G	A	stop_gained	HIGH	ENSGALG00000012394
5	43779722	rs738579673	G	A	stop_gained	HIGH	FOXN3
5	25834380	.	C	A	splice_donor_variant&intron_variant	HIGH	TMEM87A
5	313203	.	T	A	splice_acceptor_variant&intron_variant	HIGH	DDB1
5	313202	.	G	A	splice_acceptor_variant&intron_variant	HIGH	DDB1
5	1657558	.	C	T	splice_donor_variant&intron_variant	HIGH	MRPL21
5	25251010	rs793974772	C	T	stop_gained	HIGH	MGA
5	21885215	.	C	T	stop_gained	HIGH	ALKBH3
5	25842307	.	C	A	splice_donor_variant&intron_variant	HIGH	TMEM87A
5	55002942	.	C	A	splice_donor_variant&intron_variant	HIGH	L3HYPDH
5	48744100	rs737316639	A	G	splice_acceptor_variant&intron_variant	HIGH	ENSGALG00000052029
5	51699515	.	C	A	stop_gained&splice_region_variant	HIGH	ENSGALG00000011608
5	12754996	.	A	G	splice_acceptor_variant&intron_variant	HIGH	LDHA
5	17231522	rs15673689	C	T	stop_gained	HIGH	MED19
5	54763148	.	G	A	splice_donor_variant&intron_variant	HIGH	DHRS7
5	34776002	.	A	C	splice_acceptor_variant&intron_variant	HIGH	NUBPL
5	45705944	.	C	A	splice_acceptor_variant&intron_variant	HIGH	SERPINA10
5	56669698	.	A	G	splice_donor_variant&intron_variant	HIGH	CDKN3
5	39591101	.	A	C	splice_acceptor_variant&intron_variant	HIGH	ADCK1
5	36288211	.	G	T	splice_acceptor_variant&intron_variant	HIGH	SRP54
5	23795920	rs317917092	C	T	stop_gained	HIGH	AMBRA1
5	9824832	rs738490921	A	G	splice_acceptor_variant&intron_variant	HIGH	ASCL3
5	32187165	rs737584753	A	G	start_lost	HIGH	DPH6
5	4803297	rs15345599	C	G	splice_donor_variant&intron_variant	HIGH	ARL14EP
5	44008401	rs15714640	G	T	stop_gained	HIGH	PSMC1
5	22234664	.	T	A	splice_donor_variant&intron_variant	HIGH	CD82
5	22234663	.	G	A	splice_donor_variant&intron_variant	HIGH	CD82
5	23152832	.	G	A	stop_gained	HIGH	SLC39A13
5	329371	.	G	C	splice_donor_variant&intron_variant	HIGH	TKFC
5	38306443	.	G	T	splice_acceptor_variant&intron_variant	HIGH	DLST
5	22536970	.	T	A	splice_donor_variant&intron_variant	HIGH	PRDM11
5	56645018	.	T	C	splice_donor_variant&intron_variant	HIGH	GMFB
5	55468663	.	C	T	splice_donor_variant&intron_variant	HIGH	PSMA3
5	50665258	rs735563585	C	T	splice_acceptor_variant&intron_variant	HIGH	XRCC3
6	30975792	rs316643446	T	C	start_lost	HIGH	SFXN4
6	3428839	.	G	T	splice_acceptor_variant&intron_variant	HIGH	SHLD2
6	11507894	.	T	C	splice_donor_variant&intron_variant	HIGH	ENSGALG00000042254
6	1266681	rs741608897	T	A	stop_gained	HIGH	ENSGALG00000039727
6	26837189	.	C	T	splice_donor_variant&intron_variant	HIGH	SMNDC1
6	11168669	rs16541272	C	T	splice_acceptor_variant&intron_variant	HIGH	ENSGALG00000047312
6	17517976	.	T	A	splice_acceptor_variant&intron_variant	HIGH	TM9SF3
6	32046791	.	C	A	splice_donor_variant&intron_variant	HIGH	ENSGALG00000009504
6	11905395	rs313006061	C	G	splice_donor_variant&intron_variant	HIGH	P4HA1
6	33485950	.	G	C	splice_donor_variant&intron_variant	HIGH	BCCIP
6	919854	.	T	C	stop_lost	HIGH	ENSGALG00000031497
6	9987239	.	T	C	splice_donor_variant&intron_variant	HIGH	CHUK
6	23300250	rs14583068	T	C	stop_lost&splice_region_variant	HIGH	MMS19
6	12303622	rs740009455	T	A	start_lost	HIGH	SGPL1
6	19365859	.	C	T	stop_gained	HIGH	ENSGALG00000048372
6	5880137	.	A	C	splice_donor_variant&intron_variant	HIGH	ANXA11
6	34225945	.	G	C	splice_acceptor_variant&intron_variant	HIGH	ENSGALG00000049429
6	19507966	rs740023519	C	T	stop_gained	HIGH	C10orf71
6	5893458	rs313903616	A	G	splice_donor_variant&intron_variant	HIGH	ANXA11
6	23299762	.	G	A	stop_gained	HIGH	MMS19
6	10070727	.	T	C	splice_acceptor_variant&intron_variant	HIGH	MTG1
6	31295327	.	T	A	splice_donor_variant&intron_variant	HIGH	INPP5F
6	31295326	.	G	A	splice_donor_variant&intron_variant	HIGH	INPP5F
6	21984706	rs317038660	G	T	splice_acceptor_variant&intron_variant	HIGH	ENSGALG00000047490
6	16345277	.	A	T	splice_donor_variant&intron_variant	HIGH	PLAU
6	23318277	rs315268567	T	C	stop_lost	HIGH	RRP12
6	24005811	rs313138737	T	G	splice_acceptor_variant&intron_variant	HIGH	ENSGALG00000049370
6	28608611	rs315345835	C	A	stop_gained	HIGH	ADRB1
6	12659160	.	A	T	splice_donor_variant&intron_variant	HIGH	PSAP
7	4641461	.	T	C	splice_donor_variant&intron_variant	HIGH	UBE2F
7	5904482	.	T	G	stop_gained&splice_region_variant	HIGH	USP40
7	21065402	.	G	C	splice_acceptor_variant&intron_variant	HIGH	IFIH1
7	28091147	.	A	C	splice_donor_variant&intron_variant	HIGH	SNX4
7	28220898	.	T	A	stop_gained	HIGH	ENSGALG00000026422
7	12585539	.	T	C	splice_donor_variant&intron_variant	HIGH	NDUFS1
7	18028140	.	A	G	splice_donor_variant&intron_variant	HIGH	DCAF17
7	28091148	.	C	A	splice_donor_variant&intron_variant	HIGH	SNX4
7	28397019	.	T	C	splice_acceptor_variant&intron_variant	HIGH	C7H2ORF76
7	36416375	.	C	G	splice_donor_variant&intron_variant	HIGH	PKP4
7	1111201	.	A	C	splice_acceptor_variant&intron_variant	HIGH	TFPI
7	26124031	.	A	C	splice_donor_variant&intron_variant	HIGH	CLASP1
7	26124032	.	C	T	splice_donor_variant&intron_variant	HIGH	CLASP1
7	22468538	.	G	T	stop_gained	HIGH	BCS1L
7	25231830	.	A	G	splice_donor_variant&intron_variant	HIGH	MRAS
7	36204522	.	C	T	stop_gained	HIGH	ENSGALG00000054784
7	17094300	.	G	A	splice_donor_variant&intron_variant	HIGH	SP3
7	634248	.	C	T	splice_donor_variant&intron_variant	HIGH	COL3A1
7	18621420	.	C	G	splice_donor_variant&intron_variant	HIGH	PPIG
7	10233717	.	C	A	stop_gained	HIGH	HSPE1
7	10233689	.	T	A	stop_gained	HIGH	HSPE1
7	336179	.	T	C	start_lost	HIGH	ORMDL1
7	336180	.	G	A	start_lost	HIGH	ORMDL1
7	31426127	.	G	A	splice_acceptor_variant&intron_variant	HIGH	ENSGALG00000048656
7	35570108	.	A	C	splice_acceptor_variant&intron_variant	HIGH	ENSGALG00000047168
7	7294352	.	A	G	splice_acceptor_variant&intron_variant	HIGH	ADARB1
7	30640558	.	G	T	splice_acceptor_variant&intron_variant	HIGH	ENSGALG00000012259
7	30440000	.	T	C	start_lost	HIGH	ACMSD
7	9683527	.	G	T	stop_gained	HIGH	ENSGALG00000007841
7	13874121	.	A	T	splice_acceptor_variant&intron_variant	HIGH	ENSGALG00000053678
7	27181027	.	C	T	stop_gained	HIGH	ENSGALG00000050781
8	19247831	.	G	A	splice_donor_variant&intron_variant	HIGH	FUBP1
8	29370626	.	T	C	splice_donor_variant&intron_variant	HIGH	SRSF11
8	29370625	.	G	A	splice_donor_variant&intron_variant	HIGH	SRSF11
8	6483532	.	T	C	splice_donor_variant&intron_variant	HIGH	ENSGALG00000047573
8	27057646	rs734983672	T	C	start_lost	HIGH	CYP2J21
8	27018726	rs315863484	A	G	splice_donor_variant&intron_variant	HIGH	ENSGALG00000054726
8	313288	.	T	G	stop_lost	HIGH	ENSGALG00000050467
8	22240142	.	G	A	splice_donor_variant&intron_variant	HIGH	CYP4B7
8	2838773	.	T	C	splice_donor_variant&intron_variant	HIGH	DENND1B
8	19418075	.	G	A	splice_acceptor_variant&intron_variant	HIGH	ENSGALG00000008988
8	30101686	.	A	C	splice_donor_variant&intron_variant	HIGH	SLC44A5
8	3880369	.	G	A	splice_donor_variant&intron_variant	HIGH	GLRX2
8	3880370	.	T	C	splice_donor_variant&intron_variant	HIGH	GLRX2
8	24604004	.	T	C	splice_acceptor_variant&intron_variant	HIGH	TXNDC12
8	30101687	.	C	T	splice_donor_variant&intron_variant	HIGH	SLC44A5
8	29336029	rs317060281	C	T	splice_donor_variant&intron_variant	HIGH	ENSGALG00000049561
8	20734082	rs313846828	C	T	stop_gained	HIGH	SLC6A9
8	25518797	rs14654583	G	A	stop_gained	HIGH	MRPL37
8	6415688	.	G	A	stop_gained	HIGH	CEP350
8	20047175	.	T	G	splice_acceptor_variant&intron_variant	HIGH	ELOVL1
8	1841650	rs313799226	T	C	splice_acceptor_variant&intron_variant	HIGH	DDX59
8	25490351	.	G	C	splice_acceptor_variant&intron_variant	HIGH	TCEANC2
8	5143295	.	C	G	splice_acceptor_variant&intron_variant	HIGH	PRRC2C
8	2146979	rs733311305	C	T	splice_donor_variant&intron_variant	HIGH	ENSGALG00000048748
8	6182531	.	A	T	stop_gained	HIGH	IER5
8	26289884	.	C	A	stop_gained	HIGH	DAB1
8	22282146	.	G	A	stop_gained	HIGH	STIL
8	17005028	.	G	T	stop_gained	HIGH	DNASE2B
8	5859957	.	A	T	splice_donor_variant&intron_variant	HIGH	ALDH9A1
8	5470263	.	T	A	splice_donor_variant&intron_variant	HIGH	C1orf112
8	5470262	.	A	G	splice_donor_variant&intron_variant	HIGH	C1orf112
8	16314870	.	G	A	splice_acceptor_variant&intron_variant	HIGH	SELENOF
9	23184281	rs741014188	A	G	splice_acceptor_variant&intron_variant	HIGH	PLCH1
9	21009722	rs316471874	A	G	splice_donor_variant&intron_variant	HIGH	ENSGALG00000052663
9	12843824	.	G	A	splice_acceptor_variant&intron_variant	HIGH	PPP1R2
9	16104092	rs10722432	G	A	splice_donor_variant&intron_variant	HIGH	POLR2H
9	3828776	.	C	A	splice_acceptor_variant&intron_variant	HIGH	LIPH
9	10216262	.	C	T	splice_donor_variant&intron_variant	HIGH	TRIP12
9	23347592	.	G	A	splice_donor_variant&intron_variant	HIGH	DHX36
9	11649365	.	C	T	splice_acceptor_variant&intron_variant	HIGH	PLOD2
9	23797360	.	A	T	splice_donor_variant&intron_variant	HIGH	EIF2A
9	23797361	.	C	G	splice_donor_variant&intron_variant	HIGH	EIF2A
9	15721680	rs15976554	G	A	splice_donor_variant&intron_variant	HIGH	ENSGALG00000023866
9	15104274	rs10727455	G	A	splice_acceptor_variant&intron_variant	HIGH	TFRC
9	15053179	rs317661559	A	C	splice_acceptor_variant&intron_variant	HIGH	ENSGALG00000027722
9	8243611	.	T	C	splice_donor_variant&intron_variant	HIGH	ACSL3
9	8675373	.	G	A	stop_gained	HIGH	DOCK10
9	18189018	rs16699137	C	T	splice_donor_variant&intron_variant	HIGH	ENSGALG00000053045
9	10979433	.	T	A	splice_donor_variant&intron_variant	HIGH	SLC9A9
9	20744327	rs313796446	C	T	start_lost	HIGH	SERPINI1
9	18342510	rs14677968	C	T	splice_acceptor_variant&intron_variant	HIGH	ENSGALG00000051388
9	5117749	.	C	G	splice_acceptor_variant&intron_variant	HIGH	HDLBP
9	15399738	rs317263221	G	A	splice_donor_variant&intron_variant	HIGH	ARMC9
9	22843693	rs15987702	A	C	stop_gained	HIGH	ENSGALG00000020626
9	4534840	.	G	C	splice_donor_variant&intron_variant	HIGH	ENSGALG00000006564
9	16068377	.	T	G	splice_donor_variant&intron_variant	HIGH	EIF4G1
9	16068376	.	G	T	splice_donor_variant&intron_variant	HIGH	EIF4G1
9	5389068	rs316892681	G	T	stop_gained	HIGH	OTOS
9	5076161	rs313089531	C	T	stop_gained	HIGH	SNED1
9	5047802	rs739496261	C	T	stop_gained	HIGH	AGXT
9	2402753	rs316135233	T	C	stop_lost	HIGH	PLEKHB2
10	8473292	.	G	T	stop_gained	HIGH	RSL24D1
10	10597721	.	G	A	splice_acceptor_variant&intron_variant	HIGH	DUT
10	11148535	.	G	A	splice_donor_variant&intron_variant	HIGH	BLOC1S6
10	11148536	.	T	A	splice_donor_variant&intron_variant	HIGH	BLOC1S6
10	7747708	.	A	T	stop_gained	HIGH	ENSGALG00000036680
10	6196778	.	A	G	start_lost	HIGH	MTMR10
10	8412688	.	T	G	splice_acceptor_variant&intron_variant	HIGH	CCPG1
10	2644415	.	T	G	splice_acceptor_variant&intron_variant	HIGH	NPTN
10	2052903	.	A	T	splice_donor_variant&intron_variant	HIGH	PKLR
10	8131766	.	C	T	splice_donor_variant&intron_variant	HIGH	TEX9
10	18184579	.	T	A	splice_donor_variant&intron_variant	HIGH	CLPX
10	11731741	.	A	G	splice_acceptor_variant&intron_variant	HIGH	ENSGALG00000048128
10	1133083	.	C	A	splice_acceptor_variant&intron_variant	HIGH	ENSGALG00000052177
10	12618430	.	G	A	splice_donor_variant&intron_variant	HIGH	ENSGALG00000034021
10	11186838	.	G	A	start_lost	HIGH	SPPL2A
10	16265572	.	T	G	splice_donor_variant&intron_variant	HIGH	NR2F2
10	3078872	.	T	C	start_lost	HIGH	ENSGALG00000045534
10	6240563	.	A	T	splice_donor_variant&intron_variant	HIGH	MPHOSPH10
10	6240564	.	C	G	splice_donor_variant&intron_variant	HIGH	MPHOSPH10
10	8131765	.	A	T	splice_donor_variant&intron_variant	HIGH	TEX9
10	4234251	.	A	T	splice_donor_variant&intron_variant	HIGH	IDH3A
10	11114240	.	T	G	stop_gained	HIGH	ENSGALG00000005682
10	635801	.	A	G	stop_lost	HIGH	ENSGALG00000038550
10	12155440	.	C	T	stop_gained	HIGH	EFL1
10	9133545	.	A	G	start_lost	HIGH	FAM214A
10	10515688	.	A	C	splice_donor_variant&intron_variant	HIGH	MYEF2
10	729285	.	A	T	splice_acceptor_variant&intron_variant	HIGH	ENSGALG00000047924
11	7682383	.	G	A	splice_acceptor_variant&intron_variant	HIGH	NETO2
11	1091184	.	G	A	stop_gained	HIGH	RIPOR1
11	3418888	.	G	C	splice_donor_variant&intron_variant	HIGH	DUS2
11	8538066	.	T	C	splice_donor_variant&intron_variant	HIGH	URI1
11	7723864	.	T	G	splice_donor_variant&intron_variant	HIGH	DNAJA2
11	15370690	.	C	A	stop_gained	HIGH	CENPN
11	353676	.	C	A	stop_gained	HIGH	NDRG4
11	19042201	.	T	C	splice_donor_variant&intron_variant	HIGH	WWP2
11	11353834	.	T	C	splice_donor_variant&intron_variant	HIGH	DYNC1LI2
11	715013	.	A	C	splice_donor_variant&intron_variant	HIGH	FAM192A
11	482721	.	G	T	start_lost	HIGH	KIFC3
11	18779498	.	C	G	splice_acceptor_variant&intron_variant	HIGH	FANCA
11	7810662	.	C	A	stop_gained	HIGH	MYLK3
11	1770502	.	G	A	stop_gained	HIGH	ENSGALG00000047215
11	1812584	.	C	T	splice_donor_variant&intron_variant	HIGH	GLG1
11	10874027	.	T	C	start_lost	HIGH	LSM14A
11	10023424	.	G	A	splice_acceptor_variant&intron_variant	HIGH	GPATCH1
11	19920200	.	G	C	splice_donor_variant&intron_variant	HIGH	CHST6
11	18420322	.	A	G	splice_donor_variant&intron_variant	HIGH	CYBA
11	19044970	.	G	A	start_lost	HIGH	WWP2
11	11324930	.	G	A	splice_acceptor_variant&intron_variant	HIGH	NAE1
11	719399	.	T	C	splice_donor_variant&intron_variant	HIGH	RSPRY1
11	11379424	.	A	T	stop_gained	HIGH	DYNC1LI2
11	1771612	.	G	A	stop_gained	HIGH	ENSGALG00000047215
11	17757760	.	A	C	splice_donor_variant&intron_variant	HIGH	KIAA0513
11	11378489	.	G	A	stop_gained	HIGH	DYNC1LI2
11	7731774	.	C	T	splice_donor_variant&intron_variant	HIGH	CDCA9
12	18946911	rs314764588	C	T	stop_gained	HIGH	ITPR1
12	20136623	.	C	T	splice_donor_variant&intron_variant	HIGH	MRPS25
12	18862533	.	A	G	splice_donor_variant&intron_variant	HIGH	ITPR1
12	18862532	.	G	T	splice_donor_variant&intron_variant	HIGH	ITPR1
12	9007498	rs15648047	T	G	start_lost	HIGH	APPL1
12	19855760	.	A	T	splice_donor_variant&intron_variant	HIGH	SEC13
12	12050625	rs10723794	T	C	stop_lost	HIGH	DALRD3
12	12051548	rs731752407	G	A	stop_gained	HIGH	WDR6
12	3914307	.	T	G	splice_donor_variant&intron_variant	HIGH	IARS1
12	8791150	.	A	G	splice_acceptor_variant&intron_variant	HIGH	CCDC66
12	12050466	rs316298976	C	T	stop_gained	HIGH	DALRD3
12	12043749	.	G	A	stop_gained	HIGH	ENSGALG00000054244
12	20329220	.	C	A	splice_donor_variant&intron_variant	HIGH	ENSGALG00000052610
12	2702392	rs314436315	T	C	splice_acceptor_variant&intron_variant	HIGH	ENSGALG00000026152
12	3066753	rs316251996	C	A	stop_gained	HIGH	RBM6
12	11958549	.	C	G	splice_donor_variant&intron_variant	HIGH	ENSGALG00000043143
12	12187651	rs313329237	A	G	start_lost	HIGH	RPP14
12	10148708	rs313050073	G	T	stop_gained	HIGH	MCM2
12	12188988	rs14041865	A	G	splice_donor_variant&intron_variant	HIGH	HTD2
12	9002476	rs317076764	T	C	splice_acceptor_variant&intron_variant	HIGH	HESX1
12	3155068	.	G	A	stop_gained	HIGH	FANCD2
12	20138654	rs740781195	A	G	splice_donor_variant&intron_variant	HIGH	MRPS25
12	1640709	rs734804347	C	G	start_lost	HIGH	RFT1
12	1786701	rs14031016	C	A	stop_lost	HIGH	ENSGALG00000002099
13	17465425	.	A	C	splice_acceptor_variant&intron_variant	HIGH	P4HA2
13	4598481	.	T	C	splice_donor_variant&intron_variant	HIGH	LCP2
13	14998568	.	A	G	splice_acceptor_variant&intron_variant	HIGH	PHYKPL
13	4598480	.	G	A	splice_donor_variant&intron_variant	HIGH	LCP2
13	17465424	.	T	G	splice_acceptor_variant&intron_variant	HIGH	P4HA2
13	14211071	rs316607362	T	A	stop_gained	HIGH	ENSGALG00000005924
13	18597547	.	G	A	splice_acceptor_variant&intron_variant	HIGH	TCERG1
13	18453402	rs14065831	C	A	splice_donor_variant&intron_variant	HIGH	ENSGALG00000052007
13	9883950	rs317469461	T	A	stop_gained	HIGH	CREBRF
13	17431710	.	G	A	splice_acceptor_variant&intron_variant	HIGH	KK34
13	15758636	rs737593962	G	A	splice_acceptor_variant&intron_variant	HIGH	TRPC7
13	4026255	.	A	C	splice_donor_variant&intron_variant	HIGH	NPM1
13	17636999	.	G	A	splice_acceptor_variant&intron_variant	HIGH	ENSGALG00000006794
13	4026796	.	C	T	splice_donor_variant&intron_variant	HIGH	NPM1
13	10917649	.	G	A	splice_donor_variant&intron_variant	HIGH	RAB24
13	17697692	.	C	T	splice_donor_variant&intron_variant	HIGH	SEPTIN8
13	17561323	.	G	A	splice_donor_variant&intron_variant	HIGH	SLC22A5
13	8542576	.	A	C	splice_donor_variant&intron_variant	HIGH	PTTG2
13	11263290	.	A	T	splice_acceptor_variant&intron_variant	HIGH	SPINK5
13	1563934	.	C	G	splice_acceptor_variant&intron_variant	HIGH	ZMAT2
13	16448865	.	G	A	splice_acceptor_variant&intron_variant	HIGH	SAR1B
13	14213047	rs732980992	C	T	stop_gained	HIGH	ENSGALG00000021275
14	10515259	.	C	T	splice_donor_variant&intron_variant	HIGH	METTL22
14	8719447	.	T	G	splice_acceptor_variant&intron_variant	HIGH	RPS15A
14	8116887	rs741745201	T	A	stop_gained	HIGH	ENSGALG00000029360
14	6834243	.	T	C	splice_donor_variant&intron_variant	HIGH	TRAF7
14	15241981	rs735478670	A	T	splice_acceptor_variant&intron_variant	HIGH	ENSGALG00000050337
14	12707988	.	A	T	splice_acceptor_variant&intron_variant	HIGH	ECI1
14	13627366	rs734932497	T	C	start_lost	HIGH	NME3
14	9800969	rs316241099	G	A	splice_acceptor_variant&intron_variant	HIGH	GRIN2A
14	4422718	rs317085944	C	T	splice_donor_variant&intron_variant	HIGH	ENSGALG00000004504
14	13461763	rs734912435	G	A	stop_gained	HIGH	SEPTIN12
14	13091092	.	C	T	stop_gained	HIGH	ENSGALG00000034737
14	8138922	.	G	T	splice_donor_variant&intron_variant	HIGH	ENSGALG00000029360
14	6526397	rs318195827	T	C	splice_donor_variant&intron_variant	HIGH	ENSGALG00000005421
14	12535306	.	G	A	splice_donor_variant&intron_variant	HIGH	MRPL28
14	1411515	.	T	C	splice_acceptor_variant&intron_variant	HIGH	CCZ1
14	4751758	.	G	T	splice_acceptor_variant&intron_variant	HIGH	ARPC1A
14	3571720	rs739199445	A	T	splice_acceptor_variant&intron_variant	HIGH	ENSGALG00000053873
14	13096332	rs315617738	C	T	stop_gained	HIGH	CORO7
14	12664856	rs1059932672	G	A	stop_gained	HIGH	LUC7L
14	5472570	.	G	C	splice_donor_variant&intron_variant	HIGH	FLII
14	13496340	rs317287019	C	G	stop_gained	HIGH	CFAP70
14	13790898	rs739345808	T	A	stop_gained	HIGH	ENSGALG00000002067
14	12322334	rs1060421026	C	A	splice_donor_variant&intron_variant	HIGH	KIAA0556
14	5103246	rs15726850	G	C	splice_donor_variant&intron_variant	HIGH	MPRIP
15	6114404	.	A	T	splice_donor_variant&intron_variant	HIGH	CLIP1
15	6114405	.	C	G	splice_donor_variant&intron_variant	HIGH	CLIP1
15	3110417	.	C	G	splice_acceptor_variant&intron_variant	HIGH	SFSWAP
15	7993649	.	A	G	start_lost	HIGH	CCDC117
15	5363171	.	T	G	stop_lost	HIGH	ENSGALG00000051644
15	4791202	.	A	G	splice_acceptor_variant&intron_variant	HIGH	DHX37
15	11401704	.	T	C	splice_donor_variant&intron_variant	HIGH	THOC5
15	2894734	.	C	G	splice_donor_variant&intron_variant	HIGH	EP400
15	1079936	.	A	C	stop_lost	HIGH	GP1BB
15	7381294	.	T	A	stop_gained	HIGH	MYO18B
15	5341699	.	C	T	stop_gained	HIGH	CDK2AP1
15	9724472	.	C	T	stop_gained	HIGH	RPLP0
15	976702	.	G	C	splice_donor_variant&intron_variant	HIGH	CDC45
15	11109347	.	T	C	splice_acceptor_variant&intron_variant	HIGH	CCDC157
15	9163938	.	T	C	splice_acceptor_variant&intron_variant	HIGH	ENSGALG00000006766
15	7833341	.	C	T	splice_acceptor_variant&intron_variant	HIGH	PITPNB
15	1600180	.	C	T	splice_acceptor_variant&intron_variant	HIGH	TRMT2A
15	6500983	.	G	A	splice_donor_variant&intron_variant	HIGH	ENSGALG00000031240
15	10187150	.	T	A	splice_donor_variant&intron_variant	HIGH	ENSGALG00000028830
15	5500917	.	A	C	stop_gained&splice_region_variant	HIGH	OGFOD2
15	8719760	.	G	C	splice_donor_variant&intron_variant	HIGH	GUCD1
15	6414940	.	G	A	splice_donor_variant&intron_variant	HIGH	SH2B3
15	9206055	.	G	A	stop_gained&splice_region_variant	HIGH	ENSGALG00000006838
15	12500873	.	T	C	splice_donor_variant&intron_variant	HIGH	TBX3
15	6835640	.	C	T	splice_donor_variant&intron_variant	HIGH	CORO1C
15	5481579	.	T	A	stop_gained	HIGH	ENSGALG00000052952
16	2621553	.	G	A	splice_donor_variant&intron_variant	HIGH	C4
16	850687	.	C	G	stop_gained	HIGH	ENSGALG00000042708
16	1914628	.	G	A	stop_gained	HIGH	ENSGALG00000053682
16	2463510	.	G	A	splice_donor_variant&intron_variant	HIGH	ENSGALG00000049174
16	2097371	.	T	C	splice_acceptor_variant&intron_variant	HIGH	ENSGALG00000052732
16	2022631	.	T	C	splice_acceptor_variant&intron_variant	HIGH	ENSGALG00000054397
16	2565448	.	G	A	splice_donor_variant&intron_variant	HIGH	BF1
16	2551089	.	C	T	splice_acceptor_variant&intron_variant	HIGH	BG1
16	1916204	.	T	C	splice_acceptor_variant&intron_variant	HIGH	ENSGALG00000053682
16	2435747	.	C	T	splice_acceptor_variant&intron_variant	HIGH	ENSGALG00000046794
16	2550271	.	G	A	stop_gained	HIGH	BG1
16	2607333	.	A	G	splice_donor_variant&intron_variant	HIGH	BF2
16	1914575	.	T	C	stop_lost	HIGH	ENSGALG00000053682
16	2608036	.	C	T	splice_donor_variant&intron_variant	HIGH	BF2
16	1971149	.	T	A	stop_lost&splice_region_variant	HIGH	ENSGALG00000053730
16	2608291	.	C	T	stop_gained	HIGH	BF2
16	2272274	.	C	T	splice_donor_variant&intron_variant	HIGH	ENSGALG00000040101
16	2033294	.	T	C	splice_acceptor_variant&intron_variant	HIGH	ENSGALG00000050329
16	1505225	.	C	G	stop_gained	HIGH	ENSGALG00000043671
16	2109112	.	C	A	stop_gained	HIGH	ENSGALG00000050091
16	506213	.	A	T	splice_acceptor_variant&intron_variant	HIGH	ENSGALG00000031066
16	2083820	.	G	C	splice_acceptor_variant&intron_variant	HIGH	ENSGALG00000047627
16	1110708	.	C	G	stop_gained	HIGH	ENSGALG00000054241
17	5787588	.	T	C	splice_donor_variant&intron_variant	HIGH	DOLPP1
17	809377	.	A	C	splice_donor_variant&intron_variant	HIGH	ABCA2
17	809378	.	C	A	splice_donor_variant&intron_variant	HIGH	ABCA2
17	5349459	rs316701182	G	A	stop_gained	HIGH	SLC27A4
17	6419622	rs317006023	T	G	stop_gained	HIGH	NUP214
17	1912384	.	A	T	splice_donor_variant&intron_variant	HIGH	LRSAM1
17	5546475	.	T	G	splice_donor_variant&intron_variant	HIGH	SPTAN1
17	5546474	.	G	A	splice_donor_variant&intron_variant	HIGH	SPTAN1
17	5604311	.	C	A	stop_gained	HIGH	PKN1
17	6006324	.	A	C	splice_donor_variant&intron_variant	HIGH	C9orf78
17	780454	.	C	G	splice_acceptor_variant&intron_variant	HIGH	CLIC3
17	9091241	.	G	A	stop_gained	HIGH	RC3H2
17	1832100	rs316580713	T	C	start_lost	HIGH	WDR31
17	9664588	.	T	C	splice_donor_variant&intron_variant	HIGH	NEK6
17	8609224	rs13661398	A	T	stop_gained	HIGH	C5
17	7343564	rs315094437	A	G	start_lost	HIGH	SARDH
17	607752	rs313791716	C	T	stop_gained	HIGH	ENSGALG00000041514
17	8675155	rs735543792	T	C	stop_lost	HIGH	CNTRL
17	5654052	.	G	A	stop_gained	HIGH	SPOUT1
17	5193240	rs313639730	C	T	stop_gained	HIGH	NAIF1
17	6021617	.	G	A	splice_acceptor_variant&intron_variant	HIGH	USP20
18	4660395	.	G	C	splice_donor_variant&intron_variant	HIGH	UNC13D
18	4368530	rs737036083	G	A	splice_acceptor_variant&intron_variant	HIGH	RHBDF2
18	9489585	rs316099208	G	A	stop_gained	HIGH	ENSGALG00000050206
18	10325385	.	A	T	splice_donor_variant&intron_variant	HIGH	MYCBPAP
18	10325386	.	C	G	splice_donor_variant&intron_variant	HIGH	MYCBPAP
18	5072708	rs315755096	G	A	stop_gained	HIGH	MBTD1
18	6265527	rs15825614	G	A	splice_acceptor_variant&intron_variant	HIGH	DGKE
18	9521439	.	C	T	splice_donor_variant&intron_variant	HIGH	RNF213
18	4938964	.	G	A	splice_donor_variant&intron_variant	HIGH	FASN
18	9519729	.	T	A	splice_acceptor_variant&intron_variant	HIGH	RNF213
18	4240635	.	C	A	splice_donor_variant&intron_variant	HIGH	MFSD11
18	4240634	.	A	G	splice_donor_variant&intron_variant	HIGH	MFSD11
18	2169377	rs734262488	G	T	stop_gained	HIGH	STX8
18	9548312	rs317080507	G	A	splice_donor_variant&intron_variant	HIGH	ENSGALG00000038853
18	9488927	rs313762762	A	C	stop_lost&splice_region_variant	HIGH	ENSGALG00000050206
18	10416056	rs732656941	G	A	stop_gained	HIGH	ENSGALG00000019755
18	9257394	rs316709524	T	C	splice_donor_variant&intron_variant	HIGH	TEPSIN
18	9537933	rs14416825	A	G	stop_lost&splice_region_variant	HIGH	SLC26A11
18	4181663	rs1059141616	C	T	splice_donor_variant&intron_variant	HIGH	MGAT5B
18	9905398	.	T	C	splice_donor_variant&intron_variant	HIGH	GCGR
18	10640304	rs737950008	G	A	stop_gained	HIGH	SLC16A5
18	7066868	rs739441830	A	T	stop_lost&splice_region_variant	HIGH	ENSGALG00000026816
18	10712533	.	A	G	splice_donor_variant&intron_variant	HIGH	GGA3
18	10522267	.	C	T	stop_gained	HIGH	FDXR
18	5955456	.	C	A	splice_donor_variant&intron_variant	HIGH	MMD
18	4708330	.	T	A	splice_donor_variant&intron_variant	HIGH	H3F3B
19	5089806	rs735376715	C	T	stop_gained	HIGH	ASL2
19	282245	rs737051310	C	T	splice_donor_variant&intron_variant	HIGH	DNAJC30
19	10158946	.	T	C	splice_acceptor_variant&intron_variant	HIGH	ENSGALG00000051339
19	9506517	.	G	A	splice_donor_variant&intron_variant	HIGH	TNFAIP1
19	961704	.	A	T	splice_acceptor_variant&intron_variant	HIGH	ELN
19	9322522	.	A	T	splice_acceptor_variant&intron_variant	HIGH	ENSGALG00000005685
19	5798714	rs431829573	G	A	stop_gained	HIGH	ENSGALG00000003595
19	532309	.	G	T	splice_acceptor_variant&intron_variant	HIGH	HIP1
19	961473	.	A	T	splice_acceptor_variant&intron_variant	HIGH	ELN
19	6022871	.	C	G	splice_donor_variant&intron_variant	HIGH	FLOT2
19	6843366	rs431866588	T	A	splice_acceptor_variant&intron_variant	HIGH	ENSGALG00000055056
19	3450005	.	T	C	splice_donor_variant&intron_variant	HIGH	ATP2A3
19	6126406	.	C	A	stop_gained	HIGH	NUFIP2
19	4436017	.	C	T	splice_donor_variant&intron_variant	HIGH	MDH2
19	3027797	.	C	G	splice_donor_variant&intron_variant	HIGH	EIF4H
19	235195	.	G	C	splice_acceptor_variant&intron_variant	HIGH	ENSGALG00000037051
19	7527919	.	T	C	start_lost	HIGH	TUBD1
19	8779951	.	A	C	splice_donor_variant&intron_variant	HIGH	DDX52
19	5111196	rs14120239	T	C	start_lost	HIGH	CRCP
19	8779952	.	C	T	splice_donor_variant&intron_variant	HIGH	DDX52
19	832376	rs314390647	C	T	stop_gained	HIGH	MTMR4
19	9461689	rs431895794	A	G	start_lost	HIGH	TNFAIP1
19	3392106	rs732513567	A	G	splice_acceptor_variant&intron_variant	HIGH	ZZEF1
19	7148621	rs431902687	A	C	splice_donor_variant&intron_variant	HIGH	ENSGALG00000037314
19	5071432	.	A	G	splice_donor_variant&intron_variant	HIGH	GUSB
19	5071433	.	T	A	splice_donor_variant&intron_variant	HIGH	GUSB
20	1421084	.	A	T	splice_donor_variant&intron_variant	HIGH	MAP1LC3A
20	9492711	.	T	C	start_lost	HIGH	UCKL1
20	9492793	.	G	A	stop_gained	HIGH	UCKL1
20	254840	.	T	C	splice_acceptor_variant&intron_variant	HIGH	EPB41L1
20	10751445	.	C	T	splice_donor_variant&intron_variant	HIGH	ENSGALG00000049958
20	1448863	.	C	G	splice_donor_variant&intron_variant	HIGH	ENSGALG00000051810
20	9325695	.	G	A	splice_acceptor_variant&intron_variant	HIGH	ENSGALG00000049365
20	10733284	.	C	T	splice_donor_variant&intron_variant	HIGH	ELMO2
20	6627742	.	T	C	splice_acceptor_variant&intron_variant	HIGH	ENSGALG00000042613
20	1160297	.	G	T	stop_gained	HIGH	ENSGALG00000034085
20	10088366	.	T	C	splice_acceptor_variant&intron_variant	HIGH	PDRG1
20	5140622	.	G	C	splice_donor_variant&intron_variant	HIGH	SDC4
20	11588578	.	T	C	splice_donor_variant&intron_variant	HIGH	ENSGALG00000053536
20	10374062	.	T	A	splice_donor_variant&intron_variant	HIGH	TGM2
20	9773780	.	T	C	splice_acceptor_variant&intron_variant	HIGH	STK35
20	2568972	.	G	A	splice_acceptor_variant&intron_variant	HIGH	TRPC4AP
20	11067280	.	A	C	splice_donor_variant&intron_variant	HIGH	NPEPL1
20	9788820	.	G	C	stop_gained	HIGH	ENSGALG00000006152
20	9983853	.	C	G	stop_gained	HIGH	REM1
20	9805564	.	C	G	stop_gained	HIGH	SIRPA
20	10268817	.	G	A	splice_donor_variant&intron_variant	HIGH	MAPRE1
20	5227450	.	C	T	stop_gained	HIGH	ENSGALG00000004110
20	5082256	.	A	G	splice_acceptor_variant&splice_donor_variant&intron_variant	HIGH	ENSGALG00000044684
20	662704	.	A	C	stop_gained	HIGH	RBL1
20	11246843	.	A	T	stop_gained	HIGH	ENSGALG00000007575
20	1036414	.	T	A	splice_donor_variant&intron_variant	HIGH	RBM39
20	900537	.	A	G	splice_acceptor_variant&intron_variant	HIGH	ENSGALG00000025948
20	6456728	.	T	C	splice_donor_variant&intron_variant	HIGH	STAU1
20	5339732	.	G	C	stop_gained	HIGH	ENSGALG00000023844
20	6870582	.	T	C	splice_donor_variant&intron_variant	HIGH	FAM217B
21	6675346	.	G	T	splice_acceptor_variant&intron_variant	HIGH	EIF4G3
21	634054	.	T	C	splice_donor_variant&intron_variant	HIGH	ICMT
21	5659342	rs732406007	T	A	splice_donor_variant&intron_variant	HIGH	MAD2L2
21	4185026	.	G	T	stop_gained	HIGH	MTOR
21	2095539	.	G	A	splice_donor_variant&intron_variant	HIGH	ENSGALG00000001483
21	4310920	.	A	C	splice_donor_variant&intron_variant	HIGH	ZBTB17
21	4757912	.	T	A	splice_donor_variant&intron_variant	HIGH	MINOS1
21	3269458	.	A	T	splice_donor_variant&intron_variant	HIGH	GPR157
21	3269459	.	C	T	splice_donor_variant&intron_variant	HIGH	GPR157
21	587217	.	T	C	splice_donor_variant&intron_variant	HIGH	NOL9
21	6551163	.	C	T	splice_donor_variant&intron_variant	HIGH	HSPG2
21	2029233	.	T	A	splice_donor_variant&intron_variant	HIGH	CDC2L1
21	4757911	.	G	A	splice_donor_variant&intron_variant	HIGH	MINOS1
21	4296146	.	C	A	stop_gained	HIGH	SPEN
21	3229870	.	T	C	splice_acceptor_variant&intron_variant	HIGH	ENO1
22	241536	.	A	C	splice_acceptor_variant&intron_variant	HIGH	NFU1
22	2764430	rs13738294	T	C	start_lost	HIGH	ENSGALG00000047639
22	5345360	.	G	A	splice_acceptor_variant&intron_variant	HIGH	GPAT2
22	4007123	.	A	G	start_lost	HIGH	ENSGALG00000051290
22	2492672	.	T	G	splice_donor_variant&intron_variant	HIGH	ERLIN2
22	4006030	.	G	A	stop_gained	HIGH	ENSGALG00000046731
22	1656629	.	A	T	splice_acceptor_variant&intron_variant	HIGH	ENSGALG00000046740
22	1419247	rs313118337	C	T	stop_gained	HIGH	TNFRSF10B
22	2753055	.	G	A	splice_donor_variant&intron_variant	HIGH	ADAM9
22	1418711	rs736008824	C	T	stop_gained	HIGH	TNFRSF10B
22	5161137	.	A	G	splice_acceptor_variant&intron_variant	HIGH	NT5DC4
22	3732435	.	C	T	splice_donor_variant&intron_variant	HIGH	CNNM4
22	5225748	rs1057701860	C	T	stop_gained	HIGH	NUDCD3
22	3729065	.	A	T	splice_acceptor_variant&intron_variant	HIGH	ANKRD39
22	5159918	.	C	T	stop_gained	HIGH	NT5DC4
22	1667872	.	T	C	splice_acceptor_variant&intron_variant	HIGH	XPO7
22	1667871	.	G	C	splice_acceptor_variant&intron_variant	HIGH	XPO7
22	2750698	.	C	A	stop_gained	HIGH	ADAM9
22	5263064	.	A	C	splice_donor_variant&intron_variant	HIGH	GNLY
22	3056242	.	G	A	splice_donor_variant&intron_variant	HIGH	VDAC3
22	5140518	rs1057827048	C	T	splice_acceptor_variant&intron_variant	HIGH	ENSGALG00000038783
23	3394351	rs316334363	A	T	splice_donor_variant&intron_variant	HIGH	STMN1
23	5230468	.	C	T	stop_gained	HIGH	KHDRBS1
23	357356	.	G	A	splice_acceptor_variant&intron_variant	HIGH	MATN1
23	2303820	.	A	G	splice_acceptor_variant&intron_variant	HIGH	ENSGALG00000054143
23	2553463	.	G	A	splice_acceptor_variant&intron_variant	HIGH	RSRP1
23	1899934	rs731749981	G	T	splice_donor_variant&intron_variant	HIGH	ZDHHC18
23	3370507	rs313951423	G	A	stop_gained	HIGH	TRIM63
23	390242	rs1058095739	A	T	stop_gained	HIGH	LAPTM5
23	4491309	rs731653961	A	C	stop_lost	HIGH	IFI27L2
23	4490501	rs739618406	C	T	stop_gained	HIGH	IFI27L2
23	3695399	.	T	C	splice_donor_variant&intron_variant	HIGH	INPP5B
23	3695398	.	G	A	splice_donor_variant&intron_variant	HIGH	INPP5B
24	5841386	.	C	T	splice_donor_variant&intron_variant	HIGH	NCAM1
24	3135651	rs1060377626	A	T	stop_gained	HIGH	JHY
24	4298404	rs741339141	C	T	stop_gained	HIGH	ENSGALG00000052833
24	2588741	rs731613723	C	A	stop_gained	HIGH	THYN1
24	6170102	.	G	A	splice_donor_variant&intron_variant	HIGH	IL18
24	433881	.	G	C	splice_acceptor_variant&intron_variant	HIGH	SRPRA
25	1442230	.	G	C	splice_acceptor_variant&intron_variant	HIGH	POLR3C
25	3350487	.	C	A	splice_donor_variant&intron_variant	HIGH	ILF2
25	1427286	.	C	T	stop_gained	HIGH	ENSGALG00000052849
25	2873746	.	A	C	stop_lost	HIGH	TPM3
25	2561698	.	A	G	splice_acceptor_variant&intron_variant	HIGH	ARHGEF11
25	1427062	.	G	A	stop_gained	HIGH	ENSGALG00000052849
25	339111	.	C	T	splice_donor_variant&intron_variant	HIGH	ENSGALG00000050187
25	3446083	.	A	G	start_lost	HIGH	ENSGALG00000048707
25	2877601	.	C	T	splice_donor_variant&intron_variant	HIGH	TPM3
25	2837864	.	G	A	stop_gained	HIGH	ENSGALG00000054117
25	2565890	.	G	A	stop_gained	HIGH	LRRC71
25	226110	.	G	A	stop_gained	HIGH	PRUNE1
25	291419	.	C	T	stop_gained	HIGH	ZNF687
25	2924899	.	G	A	splice_donor_variant&intron_variant	HIGH	ATP8B2
25	3705799	.	G	A	stop_gained	HIGH	ENSGALG00000043416
25	3762743	.	G	A	splice_acceptor_variant&intron_variant	HIGH	ENSGALG00000047570
25	156172	.	A	G	stop_lost	HIGH	ENSGALG00000054978
25	3622279	.	G	T	splice_donor_variant&intron_variant	HIGH	ENSGALG00000014643
25	3972882	.	C	A	stop_gained	HIGH	ENSGALG00000052689
25	378452	.	G	T	splice_acceptor_variant&intron_variant	HIGH	POGZ
25	252474	.	C	T	stop_gained	HIGH	SCNM1
26	5438781	.	C	T	splice_acceptor_variant&intron_variant	HIGH	ENSGALG00000047139
26	4416037	.	A	G	splice_donor_variant&intron_variant	HIGH	HMGA1
26	4097521	rs16203775	A	T	splice_donor_variant&intron_variant	HIGH	PPARD
26	3760036	.	A	T	splice_donor_variant&intron_variant	HIGH	PTPN22
26	1245800	.	G	A	splice_donor_variant&intron_variant	HIGH	GNAI3
26	3564763	.	A	G	splice_donor_variant&intron_variant	HIGH	PPM1J
26	4741862	rs736884942	A	G	stop_lost	HIGH	TREM-B1
26	1232640	.	A	G	splice_donor_variant&intron_variant	HIGH	AMIGO1
26	2282613	rs315706354	A	C	splice_donor_variant&intron_variant	HIGH	RAB29
26	1425092	.	C	A	splice_acceptor_variant&intron_variant	HIGH	LAMTOR5
26	4076556	rs739237223	A	T	splice_donor_variant&intron_variant	HIGH	ENSGALG00000050007
26	1817749	rs732465551	A	G	start_lost	HIGH	MDM4
26	2282653	rs316557708	C	T	stop_gained	HIGH	RAB29
26	3763092	.	C	T	splice_donor_variant&intron_variant	HIGH	BCL2L15
26	3288987	rs15233916	G	C	stop_lost&splice_region_variant	HIGH	TRAF3IP3
26	3948486	.	T	C	splice_donor_variant&intron_variant	HIGH	ENSGALG00000002170
26	1734543	rs317365553	G	T	splice_donor_variant&intron_variant	HIGH	GOLT1A
26	2494433	.	C	T	stop_gained	HIGH	RASSF5
27	2561685	.	G	A	stop_gained	HIGH	ENSGALG00000051289
27	2743571	rs737511958	C	G	stop_lost&splice_region_variant	HIGH	ENSGALG00000052634
27	2649195	.	C	T	splice_donor_variant&intron_variant	HIGH	ENSGALG00000036395
27	3929998	.	A	G	splice_acceptor_variant&intron_variant	HIGH	GPATCH8
27	3974748	.	A	G	splice_donor_variant&intron_variant	HIGH	GRN
27	3976990	rs312868163	A	G	stop_lost&splice_region_variant	HIGH	GPATCH8
27	7051974	.	G	C	splice_donor_variant&intron_variant	HIGH	ERBB2
27	3689758	rs314443939	A	G	splice_donor_variant&intron_variant	HIGH	EFTUD2
27	7019027	.	T	C	splice_donor_variant&intron_variant	HIGH	STARD3
27	3057643	.	T	G	start_lost	HIGH	ENSGALG00000052246
27	2628863	rs739635963	C	T	stop_gained	HIGH	ENSGALG00000047069
27	7024752	rs730982971	C	G	stop_gained	HIGH	STARD3
27	6593645	.	G	T	stop_gained	HIGH	NPEPPS
27	5130885	rs318052039	G	A	splice_donor_variant&intron_variant	HIGH	DCAF7
27	7535358	.	G	T	splice_donor_variant&intron_variant	HIGH	ACLY
27	6916626	rs735657206	T	C	splice_acceptor_variant&intron_variant	HIGH	CACNB1
27	5747224	.	G	C	splice_donor_variant&intron_variant	HIGH	SLC35B1
27	6523025	.	T	A	splice_donor_variant&intron_variant	HIGH	SCRN2
27	3674730	rs739205210	G	A	stop_gained	HIGH	EFTUD2
27	7018365	rs1059613897	C	T	stop_gained	HIGH	ENSGALG00000044406
27	5462506	.	A	G	stop_lost&splice_region_variant	HIGH	ENSGALG00000054154
27	7937523	rs735489151	C	T	splice_acceptor_variant&intron_variant	HIGH	VAT1
27	7526014	.	C	T	splice_donor_variant&intron_variant	HIGH	ACLY
28	1560799	.	A	C	splice_acceptor_variant&intron_variant	HIGH	EEF2
28	3272977	.	G	C	stop_gained	HIGH	ENSGALG00000040182
28	2623824	.	A	G	splice_donor_variant&intron_variant	HIGH	UBXN6
28	4063023	.	C	A	splice_donor_variant&intron_variant	HIGH	PGPEP1
28	3360524	.	G	C	stop_lost	HIGH	SLC39A3
28	2909674	.	G	A	splice_donor_variant&intron_variant	HIGH	PTBP1
28	1750271	.	T	C	start_lost	HIGH	ACSBG2
28	3277096	.	C	T	stop_gained	HIGH	DAZAP1
28	2754518	.	A	G	splice_acceptor_variant&intron_variant	HIGH	ENSGALG00000001317
28	2754537	.	G	A	stop_gained	HIGH	ENSGALG00000001317
28	1493537	.	C	T	stop_gained	HIGH	FSD1
28	3822485	.	C	T	splice_acceptor_variant&intron_variant	HIGH	DDX49
28	935985	.	C	T	splice_donor_variant&intron_variant	HIGH	RAB11B
28	3290674	.	G	A	splice_acceptor_variant&intron_variant	HIGH	DAZAP1
28	1081707	.	G	A	stop_gained	HIGH	APBA3
28	2924264	.	C	A	stop_gained	HIGH	PLPPR3
28	1081721	.	G	T	stop_gained	HIGH	APBA3
28	3767618	.	G	A	splice_donor_variant&intron_variant	HIGH	SUGP2
28	772853	.	A	G	splice_acceptor_variant&intron_variant	HIGH	RPL36
28	3137219	.	T	A	splice_donor_variant&intron_variant	HIGH	ATP5F1D
28	1148207	.	T	C	start_lost	HIGH	GIPC3
28	3529371	.	C	T	splice_donor_variant&intron_variant	HIGH	ENSGALG00000045684
28	3157475	.	T	C	splice_donor_variant&intron_variant	HIGH	MIDN
28	1471957	.	G	T	stop_gained	HIGH	ENSGALG00000054577
30	305382	.	T	A	splice_donor_variant&intron_variant	HIGH	ENSGALG00000048205
30	705172	.	A	G	stop_lost&splice_region_variant	HIGH	ILVBL
30	246599	.	G	A	splice_acceptor_variant&intron_variant	HIGH	TRAPPC5
30	971375	.	A	G	splice_donor_variant&intron_variant	HIGH	PCOLCE
30	662519	.	G	A	splice_acceptor_variant&intron_variant	HIGH	C3
30	1773473	.	A	C	stop_gained	HIGH	ENSGALG00000051260
30	272133	.	A	G	splice_donor_variant&intron_variant	HIGH	TAZ
30	475819	.	G	A	splice_donor_variant&intron_variant	HIGH	PGLS
30	555454	.	A	G	splice_acceptor_variant&intron_variant	HIGH	ENSGALG00000046971
31	5253609	.	A	G	stop_lost	HIGH	ENSGALG00000044330
31	5741625	.	T	C	start_lost	HIGH	CHIR-B6
31	3047673	.	C	T	stop_gained	HIGH	ENSGALG00000049433
31	2803064	.	T	A	stop_gained	HIGH	ENSGALG00000051974
31	3688201	.	T	C	start_lost	HIGH	ENSGALG00000049503
31	3128531	.	T	A	splice_acceptor_variant&intron_variant	HIGH	ENSGALG00000037650
31	4381267	.	G	A	stop_gained	HIGH	CHIR-B2
31	4263737	.	A	C	splice_donor_variant&intron_variant	HIGH	ENSGALG00000052010
31	4263738	.	C	T	splice_donor_variant&intron_variant	HIGH	ENSGALG00000052010
31	4181061	.	C	T	stop_gained	HIGH	ENSGALG00000054158
31	4043916	.	T	C	start_lost	HIGH	ENSGALG00000049317
31	1988354	.	C	G	splice_acceptor_variant&intron_variant	HIGH	ENSGALG00000053042
31	2265425	.	G	C	splice_donor_variant&intron_variant	HIGH	ENSGALG00000054294
31	3324616	.	G	T	start_lost	HIGH	ENSGALG00000052373
31	935509	.	C	A	stop_gained	HIGH	ENSGALG00000044521
31	913943	.	C	A	stop_gained	HIGH	ENSGALG00000046743
31	4281035	.	C	G	splice_acceptor_variant&intron_variant	HIGH	ENSGALG00000046135
31	2803442	.	C	A	start_lost	HIGH	ENSGALG00000051974
31	2369768	.	C	G	stop_gained	HIGH	ENSGALG00000052142
31	5815199	.	G	T	start_lost	HIGH	ENSGALG00000051595
31	2369797	.	G	A	stop_gained	HIGH	ENSGALG00000052142
31	3168533	.	T	A	stop_gained	HIGH	ENSGALG00000052568
31	4777985	.	C	T	stop_gained	HIGH	ENSGALG00000053187
32	146624	.	T	C	splice_donor_variant&intron_variant	HIGH	ENSGALG00000029330
32	232718	.	G	C	splice_acceptor_variant&intron_variant	HIGH	EHD2
32	409210	.	G	A	stop_gained	HIGH	ENSGALG00000037896
33	6029697	.	C	T	stop_gained	HIGH	ENSGALG00000050010
33	7154592	.	C	T	stop_gained	HIGH	KMT2D
33	7226526	.	T	G	splice_donor_variant&intron_variant	HIGH	CSAD
33	7184791	.	G	C	splice_acceptor_variant&intron_variant	HIGH	TNS2
33	3650838	.	G	A	stop_gained	HIGH	ENSGALG00000047648
33	6340977	.	G	T	stop_gained	HIGH	ENSGALG00000053244
33	6734162	.	A	C	splice_donor_variant&intron_variant	HIGH	RUVBL2
33	6734161	.	T	G	splice_donor_variant&intron_variant	HIGH	RUVBL2
33	7192126	.	T	C	stop_lost&splice_region_variant	HIGH	TNS2
33	7223141	.	G	A	stop_gained	HIGH	ZNF740
33	4876466	.	G	A	splice_acceptor_variant&intron_variant	HIGH	ENSGALG00000053167
33	7118860	.	A	C	splice_acceptor_variant&intron_variant	HIGH	TUBA1A
33	6585605	.	C	A	stop_gained	HIGH	CAPN1
33	4876313	.	G	A	splice_donor_variant&intron_variant	HIGH	ENSGALG00000053167
33	6345130	.	G	A	splice_donor_variant&intron_variant	HIGH	CCS
33	6629948	.	A	G	splice_acceptor_variant&intron_variant	HIGH	FAU

## Sheet: Boiler_HighImpactInDels
Chr	Chr_location	DB_SNP ID	Ref Nucleotide	Mutated Nucleotide	SNP Nature	Impact	Gene
14	6378631	.	A	AAC	frameshift_variant	HIGH	CHTF18
7	15404202	.	T	TCC	frameshift_variant&splice_region_variant	HIGH	ENSGALG00000009149
15	5743411	.	GGGC	GGGCAGGC	frameshift_variant	HIGH	ENSGALG00000040131
30	1376486	.	CCT	CCTACT	stop_gained&conservative_inframe_insertion	HIGH	ENSGALG00000041008
5	55727790	.	GCT	GCTACT	stop_gained&conservative_inframe_insertion	HIGH	NAA30
8	8332906	.	AAGAG	AAGAGAG	frameshift_variant	HIGH	FAM129A
32	305446	.	GG	GGTG	frameshift_variant	HIGH	ENSGALG00000052101
11	7288306	.	CG	CGG	splice_acceptor_variant&splice_donor_variant&intron_variant	HIGH	N4BP1
9	17710718	.	T	TC	frameshift_variant	HIGH	PIK3CA
19	9404754	.	C	CGCGA	frameshift_variant	HIGH	NLK
3	40788417	.	C	CA	splice_acceptor_variant&splice_donor_variant&intron_variant	HIGH	PDCD2
1	80504545	.	AC	ACC	frameshift_variant	HIGH	GTF2E1
28	2940404	.	GGGAGTGGA	GGGA	frameshift_variant	HIGH	MED16
4	38738931	.	GGCGC	GGCGCCGCGC	frameshift_variant	HIGH	PPA2
1	15408472	.	ACCCC	ACCC	frameshift_variant&splice_region_variant	HIGH	ABCD2
5	24641968	.	G	GGA	frameshift_variant	HIGH	DLL4
8	25600939	.	AC	ACCC	frameshift_variant	HIGH	PARS2
33	4975958	.	GAT	G	frameshift_variant	HIGH	CSRNP2
3	72781564	.	CTT	CTTT	frameshift_variant	HIGH	FHL5
14	15201732	.	A	AAG	frameshift_variant	HIGH	ENSGALG00000053304
30	1374518	.	T	TTC	frameshift_variant	HIGH	ENSGALG00000041008
11	18602248	.	CCAC	CC	frameshift_variant	HIGH	CDH15
33	6690151	.	AGGGGGGG	AGGGGGGGGG	frameshift_variant	HIGH	KCNC3
4	57139091	.	C	CTCT	stop_gained&conservative_inframe_insertion	HIGH	ALPK1
3	2513992	.	AAGCCCAGCCCAGCCCAGCCCAGCCCAGCCCAGCCCAGC	AAGCCCAGCCCAGCCCAGCCCAGCCCAGCCCAGC	frameshift_variant	HIGH	RTN4
28	2646940	.	G	GT	frameshift_variant	HIGH	ENSGALG00000027587
5	49134798	.	CTG	CTGATG	stop_gained&disruptive_inframe_insertion	HIGH	DLK1
3	30795956	.	GGAAA	G	frameshift_variant	HIGH	VEGFA
2	76273405	.	C	CT	splice_donor_variant&intron_variant	HIGH	OTULIN
33	2785330	.	GGAGAG	GGAG	frameshift_variant	HIGH	ENSGALG00000044069
33	5508768	.	TGGGGGGGGG	TGGGGGGGGGGG	frameshift_variant	HIGH	ENSGALG00000047567
28	1371091	.	C	CAA	frameshift_variant	HIGH	ENSGALG00000054174
33	6028885	.	GTCCATCCATCCATCCATCCA	GTCCATCCATCCATCCA	frameshift_variant	HIGH	ENSGALG00000050010
4	34746000	.	GTGGC	GTGGCTGGC	frameshift_variant	HIGH	RBPMS
1	49437216	.	TG	TGG	frameshift_variant	HIGH	WBP2NL
2	66413072	.	TCCC	TCCCC	frameshift_variant	HIGH	ENSGALG00000027397
19	9404743	rs741196832	ACGCGCGCGCGC	ACGCGCGC	frameshift_variant	HIGH	NLK
3	16512408	.	T	TG	frameshift_variant	HIGH	ENSGALG00000023506
16	2727821	.	C	CG	frameshift_variant	HIGH	FLOT1
5	31009645	.	ATC	ATCCTTC	splice_acceptor_variant&intron_variant	HIGH	ENSGALG00000052412
19	845659	rs734932506	CA	C	frameshift_variant	HIGH	ENSGALG00000001049
14	12356588	.	A	AG	frameshift_variant	HIGH	GTF3C1
8	22982362	rs733457163	TCCCC	TCCC	frameshift_variant	HIGH	SLC5A9
4	75878445	.	A	AG	frameshift_variant	HIGH	ENSGALG00000051383
7	18062815	.	TCC	TCCC	frameshift_variant	HIGH	METTL8
27	7667722	.	G	GA	frameshift_variant	HIGH	KCNH4
2	36154	.	GCC	GC	frameshift_variant	HIGH	ENSGALG00000047569
14	13496328	.	GCCGC	GCCGCACCGC	frameshift_variant	HIGH	CFAP70
2	112945505	.	GTTT	GTTTT	frameshift_variant	HIGH	CHD7
25	3414124	.	CGGGGGGG	CGGGGGGGG	frameshift_variant	HIGH	GATAD2B
2	131206636	.	CTT	CT	frameshift_variant	HIGH	ENSGALG00000048025
3	22050271	.	A	AG	frameshift_variant	HIGH	PACC1
6	28608440	.	GAAAAAAA	GAAAAAAAA	frameshift_variant	HIGH	ADRB1
5	263107	.	GC	GCC	frameshift_variant	HIGH	BAAT
5	22853056	.	AC	ACC	frameshift_variant&splice_region_variant	HIGH	FUT8
21	4924485	.	AG	AGG	splice_acceptor_variant&splice_donor_variant&intron_variant	HIGH	DNAJC16
1	77650331	.	A	AC	frameshift_variant	HIGH	ENSGALG00000037807
1	6743822	.	C	CG	frameshift_variant	HIGH	ENSGALG00000055058
12	1852634	.	AGGCTCGGCTCGGCTCGGCTC	AGGCTCGGCTCGGCTCGGCTCGGCTC	frameshift_variant	HIGH	RASSF1
18	9489621	rs738456189	CAAAAAA	CAAAAA	frameshift_variant	HIGH	ENSGALG00000050206
5	265151	.	CG	CGG	splice_acceptor_variant&splice_donor_variant&intron_variant	HIGH	ZP1
5	290065	.	C	CA	splice_acceptor_variant&splice_donor_variant&intron_variant	HIGH	CD5
31	3028012	.	GCC	GCCC	frameshift_variant	HIGH	ENSGALG00000049114
1	93654057	.	G	GA	splice_acceptor_variant&splice_donor_variant&intron_variant	HIGH	ADPRH
33	6690158	.	G	GGT	frameshift_variant	HIGH	KCNC3
9	4911594	rs741591438	AAAAGAAAG	AAAAG	frameshift_variant	HIGH	UBXN7
5	27244755	.	TC	TCC	splice_acceptor_variant&splice_donor_variant&intron_variant	HIGH	SIPA1L1
32	594879	.	AGGG	AGGGG	frameshift_variant	HIGH	ENSGALG00000050634
14	12322393	.	CA	CAA	frameshift_variant&splice_region_variant	HIGH	KIAA0556
2	35935	.	A	AG	frameshift_variant	HIGH	ENSGALG00000047569
24	4225012	.	AGGGGGGG	AGGGGGGGG	frameshift_variant	HIGH	C1QTNF5
6	24592318	.	T	TC	frameshift_variant	HIGH	CALHM2
28	2646939	.	T	TC	frameshift_variant	HIGH	ENSGALG00000027587
1	71727360	.	ATT	ATTT	frameshift_variant	HIGH	LRP6
11	620571	.	CTTT	CTTTT	frameshift_variant	HIGH	HERPUD1
28	2250737	.	ACCCCCCC	ACCCCCC	frameshift_variant	HIGH	ENSGALG00000027540
2	91858706	rs736580556	TTAT	TT	splice_acceptor_variant&intron_variant	HIGH	CNDP2
30	302158	.	TCCC	TCCCC	frameshift_variant	HIGH	ENSGALG00000047515
31	2265426	.	CCA	C	frameshift_variant&splice_region_variant	HIGH	ENSGALG00000054294
8	25600938	.	TACACACACAC	TATACACACACACAC	frameshift_variant	HIGH	PARS2
14	7982773	.	GTT	GTTT	splice_acceptor_variant&splice_donor_variant&intron_variant	HIGH	MYH11
14	1512191	.	T	TAACA	frameshift_variant	HIGH	BHLHA15
15	6945543	.	AG	AGG	frameshift_variant&splice_region_variant	HIGH	ALKBH2
17	6419283	.	C	CA	frameshift_variant	HIGH	NUP214
17	7192347	.	AC	ACC	splice_acceptor_variant&intron_variant	HIGH	ENSGALG00000049884
27	5609563	.	ACCCCC	ACCCCCC,ACCCCCCC	frameshift_variant	HIGH	ITGA3
12	9007571	.	CCGAGGCGCGAGGCGCGAGGCGC	CCGAGGCGCGAGGCGC	frameshift_variant	HIGH	APPL1
23	2539323	.	T	TAC	frameshift_variant	HIGH	RHCE
5	433697	.	ACCC	ACCCC	frameshift_variant	HIGH	DAGLA
12	20327805	.	CGGGGGG	CGGGGGGG	frameshift_variant	HIGH	ENSGALG00000054017
1	80037560	.	AGG	AGGG	frameshift_variant&splice_region_variant	HIGH	USF3
5	287385	.	GC	GCC	frameshift_variant	HIGH	ENSGALG00000043016
23	4542464	.	CAAAAAA	CAAAAAAA	frameshift_variant	HIGH	SFPQ
7	17970207	.	AATT	AGATT	splice_acceptor_variant&splice_donor_variant&intron_variant	HIGH	DYNC1I2
1	170148854	.	TAA	TA	splice_acceptor_variant&intron_variant	HIGH	RB1
2	107917446	.	TC	TCC	splice_acceptor_variant&splice_donor_variant&intron_variant	HIGH	PRKDC
3	57621722	.	G	GA	frameshift_variant&splice_region_variant	HIGH	ENSGALG00000035769
32	415832	.	GT	G	frameshift_variant	HIGH	ENSGALG00000050819
26	2264177	.	CTTTTTTTTTTTTT	CTTTTTTTTTTTTTT,CTTTTTTTTTTTTTTT	frameshift_variant	HIGH	NUCKS1
33	3297869	.	G	GA	frameshift_variant	HIGH	GRASP
4	85439584	.	CT	CTT	frameshift_variant	HIGH	ENSGALG00000038160
28	3489181	.	TCCCCCCCCCC	TCCCCCCCCC	frameshift_variant	HIGH	ENSGALG00000051336
22	3667804	.	ACCC	ACCCC	frameshift_variant	HIGH	TMEM127
27	6594826	.	GTTTTTTTTT	GTTTTTTTTTT,GTTTTTTTTTTT,GTTTTTTTTTTTT	frameshift_variant	HIGH	NPEPPS
31	2259480	.	C	CA	frameshift_variant	HIGH	ENSGALG00000054251
3	38461901	.	CCCGCTCCGCTCCG	CCCGCTCCGCTCCGCTCCG	frameshift_variant	HIGH	ENSGALG00000052326
7	17656907	.	AGG	AGGG	frameshift_variant&splice_region_variant	HIGH	PPP1R9B
1	77654083	.	CT	CTT	frameshift_variant	HIGH	ENSGALG00000037807
6	21697727	.	CT	CTT	frameshift_variant&splice_region_variant	HIGH	KIF11
4	73391344	.	GC	GCC	frameshift_variant	HIGH	SEL1L3
1	28575251	.	CTTTTTTTT	CTTTTTTT	frameshift_variant	HIGH	THAP5
23	5122656	rs741061160	CAA	CA	frameshift_variant	HIGH	ENSGALG00000026836
12	1852760	.	GCTCTCTCCC	GC	frameshift_variant	HIGH	RASSF1
4	45301842	.	ACTC	ACTCCTCTC	frameshift_variant	HIGH	ANTXR2
1	20489755	.	GAAAAAAAAAA	GAAAAAAAAAAA	frameshift_variant	HIGH	ENSGALG00000051829
4	29702620	rs731466245	CTGTGT	CTGT	frameshift_variant&splice_region_variant	HIGH	TBC1D9
15	9566323	.	GGAGTGAGTGAG	GGAGTGAGTGAGTGAG	frameshift_variant&stop_gained	HIGH	COQ5
18	4470805	.	TCCCCCCCCC	TCCCCCCCCCCCC,TCCCCCCCCCCCCC,TCCCCCCCCCC	frameshift_variant&splice_region_variant	HIGH	UBALD2
4	75880167	.	CAA	CAAA	frameshift_variant	HIGH	ENSGALG00000054173
30	1354700	.	TGG	TGGG	frameshift_variant	HIGH	DCAF15
1	55372051	.	CTAT	CT	frameshift_variant&stop_lost	HIGH	PARPBP
1	135244746	.	AGG	AGGG	frameshift_variant	HIGH	IL18RAP
28	3149559	.	CGGG	CGGGG	frameshift_variant	HIGH	MIDN
6	21689511	.	GA	GAA	frameshift_variant&splice_region_variant	HIGH	KIF11
33	3301074	.	TCCCCCCCCCC	TCCCCCCCC,TCCCCCCCCCCC	frameshift_variant	HIGH	GRASP
3	16789531	.	A	AC	frameshift_variant	HIGH	MAP4K3
1	194407894	.	GAA	GAAA	splice_acceptor_variant&intron_variant	HIGH	RSF1
11	17380481	.	AT	ATT	frameshift_variant	HIGH	MTHFSD
27	6528969	.	TGGAGGAGGAGGAGGAGG	TGGAGGAGGAGGAGGAGGAGG	splice_donor_variant&intron_variant	HIGH	MRPL10
4	1227940	.	GGCCGCGCCGCGCCGCGCCGCGCC	GGCCGCGCCGCGCCGCGCC	frameshift_variant	HIGH	P2RY4
2	116343048	.	GA	GAA	frameshift_variant	HIGH	SULF1
28	4034081	.	GCCCGTCCCGTCCCGTCCCGTCC	GCCCGTCCCGTCCCGTCCCGTCCCGTCC	frameshift_variant	HIGH	ISYNA1
25	1829673	.	CGGGGGG	CGGGGGGG	frameshift_variant	HIGH	OTUD7B
2	132547398	.	GCC	GCCC	frameshift_variant	HIGH	NUDCD1
2	112076684	.	CT	CTT	frameshift_variant&splice_region_variant	HIGH	NSMAF
8	4389986	.	AGAGCGGAGCGGAGCGGAGCGGAGC	AGAGCGGAGCGGAGCGGAGC	frameshift_variant	HIGH	CRIP2
30	397114	.	TGGGGG	TGGGGGG,TGGGGGGG	frameshift_variant&splice_region_variant	HIGH	ACP5
31	2265375	.	TGGG	TGG	frameshift_variant	HIGH	ENSGALG00000054294
14	8080472	.	ACC	ACCC	splice_acceptor_variant&splice_donor_variant&intron_variant	HIGH	ABCC1
20	12531993	.	CTT	CTTT	frameshift_variant&stop_lost&splice_region_variant	HIGH	ENSGALG00000040546
11	17010007	.	TAA	TAAA	frameshift_variant&splice_region_variant	HIGH	HNF4beta
7	16688953	.	AG	AGG	frameshift_variant&splice_region_variant	HIGH	ATF2
25	3444616	.	CGGGGG	CGGGGGG	frameshift_variant	HIGH	ENSGALG00000049516
16	2454754	.	ACCCCCC	ACCCCCCC,ACCCCCCCC	frameshift_variant	HIGH	ENSGALG00000049229
33	4664118	.	A	AGC	frameshift_variant	HIGH	ENSGALG00000052983
3	38281176	.	TAAAAAAAA	TAAAAAAAAAA,TAAAAAAAAAAA	splice_acceptor_variant&intron_variant	HIGH	RBM34
6	1265993	.	TGGG	TGG	frameshift_variant	HIGH	ENSGALG00000039727
23	2329844	.	TGG	TGGG	frameshift_variant	HIGH	TCEA3
5	16649595	.	CT	CTT	splice_acceptor_variant&splice_donor_variant&intron_variant	HIGH	LRP5
2	35109	.	GC	GCC	frameshift_variant	HIGH	ENSGALG00000047569
1	131765737	.	GAAAAAAAAA	GAAAAAAAAAA	frameshift_variant&splice_region_variant	HIGH	NIPA1
15	120343	.	CGGGGGGGGG	CGGGGGGGGGG	frameshift_variant	HIGH	NLGN2
6	33448627	.	G	GA	frameshift_variant	HIGH	EDRF1
23	2164495	.	GC	G	frameshift_variant	HIGH	AHDC1
4	90955629	.	AGGGGGG	AGGGGGGG	frameshift_variant	HIGH	WBP1
20	12531991	.	GCC	GCCC	frameshift_variant	HIGH	ENSGALG00000040546
8	5193237	.	TA	TAA	frameshift_variant&splice_region_variant	HIGH	FMO3
17	6419282	.	GC	GCC	frameshift_variant	HIGH	NUP214
33	6271854	.	GCCCCCCCC	GCCCCCCCCC,GCCCCCCCCCC	frameshift_variant	HIGH	ENSGALG00000048236
4	1264240	.	TGG	TGGG	frameshift_variant	HIGH	ENSGALG00000028681
31	938683	.	AGCAGGGCAGGGCAG	AGCAGGGCAGGGCAGGGCAG	frameshift_variant	HIGH	ENSGALG00000044521
28	2940405	.	GGAGTG	GG	frameshift_variant	HIGH	MED16
5	18770739	.	A	AC	frameshift_variant	HIGH	NAT10
24	4292395	rs732366132	TCC	TC	frameshift_variant	HIGH	PDZD3
4	5158812	.	TGGGGGGG	TGGGGGG	frameshift_variant	HIGH	TRMT12
23	2329845	.	G	GA	frameshift_variant	HIGH	TCEA3
4	75878443	.	TAA	TAAA	frameshift_variant	HIGH	ENSGALG00000051383
10	15117647	.	AGG	AGGG	frameshift_variant	HIGH	RGMA
5	316894	.	C	CG	splice_acceptor_variant&splice_donor_variant&intron_variant	HIGH	DDB1
1	50812527	.	TC	TCC	frameshift_variant	HIGH	SUN2
12	15729753	.	CTT	CTTT	frameshift_variant&splice_region_variant	HIGH	ARL6IP5
14	15201715	rs16702595	AGG	AG	frameshift_variant	HIGH	ENSGALG00000053304
13	10852798	.	GA	GAA	splice_acceptor_variant&intron_variant	HIGH	GRK6
5	287386	.	CT	CTT	frameshift_variant	HIGH	ENSGALG00000043016
1	197030597	.	CG	CGG	frameshift_variant	HIGH	ENSGALG00000049536
11	8446200	.	A	AG	frameshift_variant	HIGH	ENSGALG00000004489
7	27912643	.	CGGGGGGG	CGGGGGGGG	frameshift_variant&splice_region_variant	HIGH	ITGB5
1	77575273	.	C	CA	frameshift_variant	HIGH	SCNN1A
15	120941	.	TGGG	TGG	frameshift_variant	HIGH	NLGN2
2	128007029	.	TC	TCC	frameshift_variant	HIGH	ENSGALG00000041179
32	87553	.	GCCCCC	GCCCCCC	frameshift_variant	HIGH	ACTN4
1	20667275	.	GA	GAA	frameshift_variant	HIGH	PLXNB2
1	92856913	.	A	AG	frameshift_variant&start_lost	HIGH	ENSGALG00000053194
1	7244508	.	AC	ACC	frameshift_variant	HIGH	OPTN
19	9618329	.	ACT	ACTCT	splice_donor_variant&intron_variant	HIGH	CLUH
3	21899418	.	GC	GCC	splice_acceptor_variant&intron_variant	HIGH	TATDN3
8	3012425	.	CAAAAAA	CAAAAAAA	frameshift_variant	HIGH	ASPM
3	100542320	.	ATTTTTT	ATTTTTTT	frameshift_variant	HIGH	ENSGALG00000016471
22	27192	.	TGG	TGGG	frameshift_variant	HIGH	ENSGALG00000042748
8	12083711	rs16628132	GATATA	GATA	frameshift_variant&splice_region_variant	HIGH	ENSGALG00000020884
21	1910388	.	CTTTTTT	CTTTTTTT	frameshift_variant	HIGH	ENSGALG00000001304
17	1313409	.	TCGTCCCTCCG	TCGTCCCTCCGTCCCTCCG	frameshift_variant	HIGH	NDOR1
1	7161570	.	GTTT	GTTTT	frameshift_variant	HIGH	CCDC3
17	6447816	.	T	TG	frameshift_variant	HIGH	PLPP7
5	16649594	.	AC	ACC	splice_acceptor_variant&splice_donor_variant&intron_variant	HIGH	LRP5
31	2219705	.	GCCCC	GCCCCC	frameshift_variant	HIGH	ENSGALG00000050005
10	11165525	.	C	CA	frameshift_variant	HIGH	ENSGALG00000033780
22	3665588	.	GCT	G	frameshift_variant	HIGH	CIAO1
9	22383109	.	TTTAA	TTTAAATTAA	splice_acceptor_variant&intron_variant	HIGH	IFT80
12	3536235	.	GCACTACTCAC	GCACTACTCACTACTCAC	frameshift_variant&stop_gained&splice_region_variant	HIGH	ENSGALG00000042984
30	1359646	.	CCGCGCG	CCGCG	frameshift_variant	HIGH	ENSGALG00000049794
33	4880507	.	CCCCGGC	CC	frameshift_variant	HIGH	ENSGALG00000049557
4	90983364	.	TCCGGCCCGGCCCG	TCCGGCCCGGCCCGGCCCG	frameshift_variant	HIGH	ENSGALG00000040291
30	646016	.	GACACACACACAC	GACACACACACACAC	frameshift_variant	HIGH	C3
15	338849	.	TTCT	TT	frameshift_variant	HIGH	CLTCL1
15	6688580	.	CA	C	frameshift_variant&splice_region_variant	HIGH	PTPN11
12	6117211	.	TTCT	TT	frameshift_variant&splice_region_variant	HIGH	HDAC11
1	12646277	.	G	GT	splice_donor_variant&intron_variant	HIGH	TMEM60
1	6849040	.	TC	TCC	splice_acceptor_variant&intron_variant	HIGH	SEC61A2
8	14463444	.	GGT	G	splice_donor_variant&intron_variant	HIGH	EVI5
3	38142004	.	CA	CAA	frameshift_variant&splice_region_variant	HIGH	B3GALNT2
13	17448293	.	CATATATA	CATATATATA	frameshift_variant	HIGH	P4HA2
14	1512192	.	CA	CACATA	frameshift_variant&stop_gained	HIGH	BHLHA15
9	4911593	.	AAAAAGAAA	AAAA	frameshift_variant	HIGH	UBXN7
1	59966298	.	TTCTCT	TTCT	frameshift_variant	HIGH	WASH1
22	5140499	.	ACGGCCCGGCCCGGCCCGGC	ACGGCCCGGCCCGGC	frameshift_variant	HIGH	ENSGALG00000038783
9	4951124	.	CTGCATG	CTG	frameshift_variant	HIGH	ING5
33	5027614	.	CGAAAAGAAAAGAAAA	CGAAAAGAAAA	frameshift_variant&stop_lost&splice_region_variant	HIGH	DAZAP2
18	10522189	rs1058295313	GA	GAA	frameshift_variant	HIGH	FDXR
9	4911597	.	AG	A	frameshift_variant	HIGH	UBXN7
17	771447	.	TGAG	TG	frameshift_variant&splice_region_variant	HIGH	ENTPD2
14	15236617	.	CTGT	CT	frameshift_variant	HIGH	REXO5
7	22642132	.	GGTA	G	splice_donor_variant&splice_region_variant&intron_variant	HIGH	TNS1
4	34694612	.	CTTT	CT	frameshift_variant	HIGH	WRN
19	644989	.	CTGTG	CTG	frameshift_variant	HIGH	TSPOAP1
14	13450314	rs740419420	CTGTGTGTGTGTGTGTGT	CTGTGTGTGTGTGTGT	frameshift_variant	HIGH	RAB11FIP3
33	4975959	.	ATC	A	frameshift_variant	HIGH	CSRNP2
22	1643480	.	CGTGGGGCTGTGGGGCTGTGGGGCTGTGGGGCTGTGGGG	CGTGGGGCTGTGGGGCTGTGGGGCTGTGGGG	frameshift_variant	HIGH	ENSGALG00000040807
4	68162295	.	ACC	A	frameshift_variant	HIGH	ATP8A1
4	39326849	.	TGCGCG	TGCGCGCG	frameshift_variant	HIGH	ENSGALG00000010611
33	3364814	.	CCACA	CCA	frameshift_variant	HIGH	CCNT1
25	3942103	.	CGGGG	CGGG	frameshift_variant&splice_region_variant	HIGH	ENSGALG00000049966
6	21623841	.	TTGT	TT	frameshift_variant	HIGH	EXOC6
2	112093348	.	C	CT	splice_acceptor_variant&intron_variant	HIGH	NSMAF
22	4029120	.	AAGGAGAGGAGAGGA	AAGGAGAGGA	frameshift_variant	HIGH	ENSGALG00000046830
3	75437190	.	AT	ATATGGACT	frameshift_variant	HIGH	CASP8AP2
26	1644927	.	CAAA	CA	frameshift_variant	HIGH	ENSGALG00000000560
4	3374156	.	GAAA	GA	frameshift_variant	HIGH	DOCK11
2	32589732	.	TGTCGG	TG	frameshift_variant	HIGH	HOXA3
3	96490559	.	AGC	A	frameshift_variant	HIGH	KLF11
1	47910872	.	GGAGAGAG	GGAGAGAGAG	frameshift_variant	HIGH	WDR91
14	1351593	.	AATA	AA	frameshift_variant	HIGH	ENSGALG00000003378
12	1850185	.	CCTG	CCTGGCTG	frameshift_variant	HIGH	ENSGALG00000041338
8	8335370	.	ATC	A	frameshift_variant	HIGH	FAM129A
6	14112666	.	GGTA	G	splice_donor_variant&splice_region_variant&intron_variant	HIGH	DLG5
5	45091918	.	CAA	C	frameshift_variant	HIGH	CHGA
4	90996670	.	GT	GTT	frameshift_variant	HIGH	ENSGALG00000041205
12	6080342	.	GCCTGCCCTGCCCTGCC	GCCTGCCCTGCCCTGCCCTGCC	frameshift_variant	HIGH	NUP210
9	5087688	.	GTTT	GT	frameshift_variant	HIGH	PASK
2	78221549	.	CC	CCTC	frameshift_variant	HIGH	ANKRD33B
15	957066	.	GGCGCTCAGCGCTCAGCGCTCAGCGCT	GGCGCTCAGCGCTCAGCGCT	frameshift_variant	HIGH	MRPL40
7	17976587	.	CTT	CTTT	frameshift_variant	HIGH	DYNC1I2
3	72657222	.	CGCGGCGGCGGCGGCGGCG	CGCGGCGGCGGCGGCGGCGGCG	start_lost&conservative_inframe_insertion	HIGH	NDUFAF4
2	19451761	.	GTATAT	GTAT	frameshift_variant	HIGH	ENSGALG00000028357
13	16620762	.	TAAAAAA	TAAAAAAAA	splice_acceptor_variant&intron_variant	HIGH	TCF7
5	478628	.	CT	CTT	frameshift_variant	HIGH	MYRF
14	13090636	.	GCCCCCCCC	GCCCCCCCCC,GCCCCCCCCCC	frameshift_variant	HIGH	ENSGALG00000034737
4	38738929	.	CCGGCGCGGCGC	CCGGCGCGGCGCGGCGC	frameshift_variant	HIGH	PPA2
33	6994143	.	TGGGGGG	TGGGGGGG	frameshift_variant	HIGH	NABP2
32	87733	.	TCCCCCCC	TCCCCCCCC	frameshift_variant	HIGH	ACTN4
2	98607880	.	TC	TCC	splice_acceptor_variant&intron_variant	HIGH	ENSGALG00000052012
6	21786895	.	ATT	ATTT	splice_acceptor_variant&splice_donor_variant&intron_variant	HIGH	2021-03-05
33	4880509	.	CCGGCGCGGCG	CCGGCG	frameshift_variant	HIGH	ENSGALG00000049557
6	21667849	.	GCCCCCCCC	GCCCCCCCCC,GCCCCCCCCCC,GCCCCCCCCCCC	frameshift_variant	HIGH	HHEX
1	79953664	.	G	GT	frameshift_variant&splice_region_variant	HIGH	FAM46C
24	446185	rs741227897	TTATA	TTA	splice_donor_variant&splice_region_variant&intron_variant	HIGH	FAM118B
11	17639385	.	AGGG	AGGGG	frameshift_variant	HIGH	GSE1
2	99604850	.	T	TTG	frameshift_variant&splice_region_variant	HIGH	LAMA1
31	2559726	.	GCCC	GCCCC	frameshift_variant	HIGH	ENSGALG00000054496
1	93654056	.	AGG	AGGG	splice_acceptor_variant&splice_donor_variant&intron_variant	HIGH	ADPRH
3	104464927	.	CGGG	CGGGG	frameshift_variant	HIGH	ENSGALG00000052087
14	8080473	.	C	CT	frameshift_variant&splice_region_variant	HIGH	ABCC1
16	2448128	.	CGGG	CGG	frameshift_variant&splice_region_variant	HIGH	ZNF692
26	5517018	.	CGGGGGGGG	CGGGGGGGGG	frameshift_variant	HIGH	ENSGALG00000052652
28	1838253	.	AAC	A	frameshift_variant	HIGH	ZNF414
25	3705818	.	AT	ATT	frameshift_variant	HIGH	ENSGALG00000043416
2	116343049	.	A	AC	frameshift_variant	HIGH	SULF1
16	2727755	.	TGGGGGGGG	TGGGGGGGGG,TGGGGGGG	frameshift_variant	HIGH	FLOT1
23	2030853	.	GGA	GGAGA	frameshift_variant	HIGH	TMEM222
22	4131567	.	GT	GTT	frameshift_variant	HIGH	HK2
22	2585456	.	A	AG	frameshift_variant	HIGH	BAG4
7	18062817	.	C	CT	frameshift_variant	HIGH	METTL8
33	6277092	.	CGG	CGGG	frameshift_variant	HIGH	ENSGALG00000048236
21	1910263	.	TCCCCCCC	TCCCCCCCC	frameshift_variant	HIGH	ENSGALG00000001304
28	1841694	.	ACTC	AC	frameshift_variant	HIGH	ZNF414
3	40922747	.	TGGGGGGG	TGGGGGG	frameshift_variant	HIGH	DLL1
5	54415445	.	CG	CGG	frameshift_variant	HIGH	SLC38A6
5	32187167	.	GT	GTT	frameshift_variant	HIGH	DPH6
1	6895882	.	C	CG	frameshift_variant	HIGH	CDC123
1	20570486	.	GC	GCC	frameshift_variant&splice_region_variant	HIGH	MAPK11
2	343579	.	GCCCC	GCCCCC	frameshift_variant	HIGH	ABCB8
32	705736	.	AGGGGGGG	AGGGGGGGG	frameshift_variant	HIGH	ENSGALG00000048210
30	246351	.	CG	CGG	splice_acceptor_variant&splice_donor_variant&intron_variant	HIGH	TRAPPC5
33	6409871	.	CGGGGGGGGG	CGGGGGGGGGG,CGGGGGGGGGGG	frameshift_variant	HIGH	ENSGALG00000047632
13	10782373	.	ACCC	ACCCC	splice_acceptor_variant&splice_donor_variant&intron_variant	HIGH	KIF20A
1	135222660	.	TCC	TCCC	frameshift_variant	HIGH	IL18R1
2	149441507	.	GCCCC	GCCCCC	splice_acceptor_variant&splice_donor_variant&intron_variant	HIGH	PUF60
23	5350591	rs740375110	GC	G	frameshift_variant	HIGH	RP1-27O5.3
10	18898405	.	TTCTCTCTCTCT	TTCTCTCTCTCTCT	frameshift_variant	HIGH	TIPIN
3	30796035	.	GAAAAAAAAAAA	GAAAAAAAAA	frameshift_variant	HIGH	VEGFA
13	10852757	.	G	GA	frameshift_variant&splice_region_variant	HIGH	GRK6
7	17656904	.	GAAA	GAAAA	frameshift_variant&splice_region_variant	HIGH	PPP1R9B
1	51496681	.	AT	ATT	frameshift_variant	HIGH	KCTD17
12	12189315	.	TCCCCCC	TCCCCCCC	frameshift_variant	HIGH	RPP14
20	9793577	.	ACCGCTCCGC	ACCGCTCCGCTCCGC	frameshift_variant	HIGH	ENSGALG00000006152
14	13236583	.	C	CT	frameshift_variant	HIGH	ANKS3
8	25600936	.	CA	CACATA	frameshift_variant	HIGH	PARS2
32	513214	.	AGGGGGGGGG	AGGGGGGGGGG	frameshift_variant	HIGH	FBXO46
8	5991580	.	G	GA	splice_acceptor_variant&splice_donor_variant&intron_variant	HIGH	RNASEL
30	964752	.	AG	AGG	frameshift_variant	HIGH	ENSGALG00000050805
8	17005024	.	CGTG	CGTGTG	frameshift_variant	HIGH	DNASE2B
33	7205794	.	TCCCC	TCCC	frameshift_variant	HIGH	RARG
10	11113294	.	ATT	ATTT	frameshift_variant	HIGH	ENSGALG00000005682
14	13090937	.	GCCCCCCCC	GCCCCCCCCC,GCCCCCCCCCC	frameshift_variant	HIGH	ENSGALG00000034737
24	267990	.	TGGGGGGG	TGGGGGGGG	frameshift_variant	HIGH	ENSGALG00000033570
5	21966783	.	GC	GCC	frameshift_variant&splice_region_variant	HIGH	EXT2
21	4924484	.	CA	CAA	frameshift_variant&splice_region_variant	HIGH	DNAJC16
33	3693079	.	ACCCCCCC	ACCCCCCCC	frameshift_variant	HIGH	ENSGALG00000047859
5	277478	.	ACC	ACCC	frameshift_variant	HIGH	TMEM132A
13	10892776	.	CTTT	CTTTT	splice_donor_variant&intron_variant	HIGH	DOK3
25	3394722	.	CGTGTGTGTGTG	CGTGTGTGTG	frameshift_variant	HIGH	INTS3
8	5991579	.	TG	TGG	splice_acceptor_variant&splice_donor_variant&intron_variant	HIGH	RNASEL
2	111093504	.	A	AG	frameshift_variant&splice_region_variant	HIGH	TGS1
7	26243511	.	GTTTTTTTTT	GTTTTTTTT,GTTTTTTT,GTTTTTT	frameshift_variant	HIGH	NIFK
4	69811427	.	T	TC	frameshift_variant&splice_region_variant	HIGH	PGM2
32	647298	.	GGAGAG	GGAG	frameshift_variant	HIGH	ENSGALG00000054044
18	693381	.	CCCCGTCCCGTCCCGTCCCG	CCCCGTCCCGTCCCG	frameshift_variant	HIGH	SCO1
25	214586	.	TGGGGGG	TGGGGGGG	frameshift_variant	HIGH	CERS2
5	55486269	rs736158637	GGATT	G	frameshift_variant	HIGH	ENSGALG00000012085
4	54699959	.	ATTTTTTTT	ATTTTTTTTT	frameshift_variant	HIGH	PDE5A
22	3791030	.	AG	AGG	frameshift_variant	HIGH	ARID5A
23	2904788	.	ACGGCCCGGCCCGGC	ACGGCCCGGCCCGGCCCGGC	frameshift_variant	HIGH	MECR
33	6345675	.	CCGC	CCGCGC	frameshift_variant	HIGH	RBM14
30	646026	.	CA	CATA	frameshift_variant	HIGH	C3
4	8712419	.	CT	CTT	frameshift_variant	HIGH	ENSGALG00000042151
4	43811775	rs740942973	AACA	AA	splice_acceptor_variant&splice_region_variant&intron_variant	HIGH	ENSGALG00000050835
15	11463707	.	TTCCATCCATCCATCCATCCA	TTCCATCCATCCATCCA	frameshift_variant	HIGH	ENSGALG00000052820
17	5366310	.	CACGAA	C	splice_donor_variant&splice_region_variant&intron_variant	HIGH	SWI5
3	38142005	.	AGG	AGGG	splice_donor_variant&intron_variant	HIGH	B3GALNT2
12	14427753	.	TGAGA	TGA	frameshift_variant	HIGH	MAGI1
28	1838254	.	ACC	AC	frameshift_variant	HIGH	ZNF414
30	1374517	.	G	GGT	frameshift_variant	HIGH	ENSGALG00000041008
5	38320941	.	AGGGG	AGGGGG	frameshift_variant	HIGH	RPS6KL1
8	8332891	rs736401271	AAAAGAAA	AAAA	frameshift_variant	HIGH	FAM129A
2	331032	.	T	TA	frameshift_variant	HIGH	CDK5
4	34949165	rs1059908137	CA	CAA	frameshift_variant	HIGH	MRPL1
1	168817668	.	CAGA	CA	frameshift_variant	HIGH	ENSGALG00000016971
1	1115933	.	GCCCC	GCC	frameshift_variant&splice_region_variant	HIGH	DENND6B
5	15930693	rs736085994	TTGACTGAC	TTGAC	frameshift_variant	HIGH	CRACR2B
3	72781559	.	ATTTT	ATTTTT	frameshift_variant	HIGH	FHL5
1	20492483	.	TAGAG	TAGAGAG	frameshift_variant	HIGH	HDAC10
10	20634564	.	ATTTT	ATT	frameshift_variant	HIGH	PPIP5K1
27	7982724	.	TTCTC	TTC	frameshift_variant	HIGH	BRCA1
33	5509330	.	CGGGG	CGGGGG	frameshift_variant	HIGH	ENSGALG00000047567
4	89619145	.	CTTTTT	CTTT	frameshift_variant	HIGH	ENSGALG00000044620
3	88950	.	TGGC	TGGCGCGGC	frameshift_variant&start_lost	HIGH	PRORSD1P
5	28194524	.	AAG	AAGAG	frameshift_variant&splice_region_variant	HIGH	PLEKHD1
4	75880169	.	A	AG	frameshift_variant	HIGH	ENSGALG00000054173
1	7161572	.	T	TC	frameshift_variant	HIGH	CCDC3
3	104463802	.	ACCCC	ACCCCC	frameshift_variant	HIGH	ENSGALG00000052087
15	6966268	.	CTT	CTTT	frameshift_variant&splice_region_variant	HIGH	ENSGALG00000005043
1	51187136	.	C	CA	frameshift_variant	HIGH	ENSGALG00000012422
21	4842062	.	AGGG	AGGGG	frameshift_variant	HIGH	PLA2G2E
2	115343928	.	CT	CTT	frameshift_variant	HIGH	ENSGALG00000031167
1	77540458	.	A	AG	frameshift_variant	HIGH	FBXO40
21	6600180	.	CGGACA	CGGACATGAGGACA	frameshift_variant&stop_gained	HIGH	RAP1GAP
3	38547107	.	AC	ACC	frameshift_variant	HIGH	TARBP1
8	8332895	.	GAAAAAAAAAAAA	GAAAAAAAAAAAAA,GAAAAAAAAAAAAAA,GAAAAAAAAAAAAAAA	frameshift_variant	HIGH	FAM129A
8	5499315	.	GT	GTT	frameshift_variant	HIGH	ENSGALG00000031430
1	194407896	.	AG	AGG	frameshift_variant&splice_region_variant	HIGH	RSF1
30	73055	.	GCCCCC	GCCCCCC	frameshift_variant	HIGH	ILF3
1	197401191	.	TGGGG	TGGGGG	frameshift_variant	HIGH	SMPD1
32	577120	.	GAAA	GAAAA	splice_acceptor_variant&intron_variant	HIGH	ENSGALG00000049935
28	1572946	.	G	GA	frameshift_variant	HIGH	NMRK2
1	195126459	.	GCTCTCTCT	GCTCTCT	frameshift_variant	HIGH	ENSGALG00000038551
13	10808209	.	TGGGG	TGGGGG	frameshift_variant	HIGH	NHP2
4	73376747	.	GCCCCCC	GCCCCCCC	frameshift_variant	HIGH	SEL1L3
32	712244	.	GC	GCC	frameshift_variant	HIGH	ENSGALG00000048951
5	27244756	.	C	CA	splice_acceptor_variant&splice_donor_variant&intron_variant	HIGH	SIPA1L1
8	21538021	.	ATTTTTTTTT	ATTTTTTTT	frameshift_variant	HIGH	NASP
15	91204	.	CGGGGGGG	CGGGGGGGG	frameshift_variant	HIGH	MBLAC1
14	3643373	.	AAAACCAAA	AAAA	splice_acceptor_variant&splice_region_variant&intron_variant	HIGH	ENSGALG00000047636
22	3665323	.	AGGGGG	AGGG	frameshift_variant	HIGH	CIAO1
2	149445740	.	C	CG	splice_acceptor_variant&splice_donor_variant&intron_variant	HIGH	PUF60
5	279355	.	CGGGGG	CGGGGGG	frameshift_variant	HIGH	TMEM132A
14	12356587	.	GAAA	GAAAA	frameshift_variant	HIGH	GTF3C1
1	7252458	.	GCCC	GCCCC	frameshift_variant	HIGH	MCM10
5	16259693	.	G	GA	frameshift_variant	HIGH	ENSGALG00000039221
2	16090618	.	TCCCCCCC	TCCCCCCCC	splice_acceptor_variant&splice_donor_variant&intron_variant	HIGH	ABI1
17	1313400	.	ATCGTCCCTTCGTCCCT	ATCGTCCCTTCGTCCCTTCGTCCCT	frameshift_variant	HIGH	NDOR1
23	6127702	.	GCCCC	GCCCCC	frameshift_variant	HIGH	ENSGALG00000048754
5	21966784	.	C	CG	frameshift_variant&splice_region_variant	HIGH	EXT2
1	129759904	.	AT	ATT	splice_acceptor_variant&splice_donor_variant&intron_variant	HIGH	ARSH
11	17914213	.	TG	TGCG	frameshift_variant	HIGH	KLHDC4
6	33728731	.	G	GA	frameshift_variant	HIGH	ENSGALG00000052052
28	3987408	.	ACCCCCCCC	ACCCCCCC	frameshift_variant	HIGH	ENSGALG00000034918
25	2101844	.	AGG	AGGG	frameshift_variant&splice_region_variant	HIGH	ENSGALG00000040685
25	1460918	.	G	GGC	frameshift_variant	HIGH	ENSGALG00000055092
7	18022117	.	AGT	AGTCTCTGT	splice_acceptor_variant&intron_variant	HIGH	DCAF17
13	16414535	.	CG	CGG	splice_acceptor_variant&splice_donor_variant&intron_variant	HIGH	CAMLG
4	3291154	.	GCGGCCCGGCCCGGCCC	GCGGCCCGGCCC	frameshift_variant	HIGH	WDR44
2	322535	.	CGG	CG	frameshift_variant	HIGH	SLC4A2
13	2690314	rs736517657	CTCCAGTTC	CTC	frameshift_variant&stop_lost&splice_region_variant	HIGH	ARAP3
14	13217449	.	AC	ACC	splice_acceptor_variant&splice_donor_variant&intron_variant	HIGH	CLUAP1
1	75876130	.	GCCC	GCCCC	splice_acceptor_variant&splice_donor_variant&intron_variant	HIGH	PHC1
1	77659776	.	GAA	GAAA	frameshift_variant	HIGH	ENSGALG00000046776
13	10779339	.	A	AC	splice_acceptor_variant&splice_donor_variant&intron_variant	HIGH	KIF20A
25	2925907	.	TGGGGGGGGGGGGG	TGGGGGGGGGGG	frameshift_variant	HIGH	ATP8B2
5	19342575	.	A	AC	frameshift_variant	HIGH	ENSGALG00000007886
13	9313497	.	CAA	CAAA	splice_acceptor_variant&intron_variant	HIGH	ENSGALG00000051897
5	294251	.	C	CA	frameshift_variant	HIGH	VPS37C
5	1079892	.	CAA	CAAA	frameshift_variant&splice_region_variant	HIGH	BAHD1
2	116757213	.	AG	AGG	frameshift_variant	HIGH	LACTB2
2	26785266	.	GTTTTT	GTTTTTT	splice_acceptor_variant&intron_variant	HIGH	SCIN
25	3513765	.	TCCCCCCCCCCC	TCCCCCCCCC	frameshift_variant	HIGH	ENSGALG00000031002
31	3027921	.	AAAAG	A	frameshift_variant	HIGH	ENSGALG00000049114
19	366654	.	CTT	CTTT	frameshift_variant	HIGH	MLXIPL
33	7209889	.	ACCCCCC	ACCCC	frameshift_variant	HIGH	RARG
25	2076707	.	CGGAC	CGGACGGAAGGAC	frameshift_variant	HIGH	ENSGALG00000049774
13	2611626	rs738272997	AG	A	frameshift_variant	HIGH	PCDHGC5
19	5198278	.	GTA	GTATA	splice_acceptor_variant&intron_variant	HIGH	ENSGALG00000021611
12	1073354	.	CTGT	CT	frameshift_variant	HIGH	STAB1
4	39782710	.	TC	T	frameshift_variant	HIGH	RWDD4
6	13100606	.	AT	ATT	splice_donor_variant&intron_variant	HIGH	PPIF
2	88549038	rs737392881	CTTTT	CTTT	frameshift_variant	HIGH	CTNNAL1
5	23425940	.	TTTGC	TTTGCTTGC	splice_acceptor_variant&intron_variant	HIGH	PACSIN3
5	38340371	rs732009180	GTTTTTTTTT	GTTTTTTT	frameshift_variant	HIGH	EIF2B2
1	20569153	.	CG	CGG	frameshift_variant&splice_region_variant	HIGH	MAPK11
9	15072212	.	T	TCC	frameshift_variant	HIGH	PCYT1A
33	7280963	.	C	CA	frameshift_variant	HIGH	SENP1
30	1208524	.	AGGGGGG	AGGGGGGG	frameshift_variant	HIGH	ENSGALG00000051159
9	20107471	.	GAAAAAAAA	GGAAAAAAAAA	frameshift_variant	HIGH	ENSGALG00000009409
6	20287811	.	CCT	C	frameshift_variant	HIGH	ENSGALG00000034232
5	1079837	.	CGAGA	CGA	frameshift_variant	HIGH	BAHD1
33	3387267	.	CGGGGGG	CGGGGGGG	frameshift_variant	HIGH	ADCY6
5	23421006	.	TACA	TA	frameshift_variant	HIGH	PACSIN3
25	3749908	.	TG	TGG	frameshift_variant	HIGH	APH1A
12	3553243	.	ACC	A	frameshift_variant	HIGH	PARP3
5	621278	.	CG	CGG	frameshift_variant	HIGH	ENSGALG00000055069
33	6690159	.	T	TTC	frameshift_variant	HIGH	KCNC3
2	111093434	.	ACC	ACCC	frameshift_variant&splice_region_variant	HIGH	TGS1
2	332878	.	AGGGGGG	AGGGGG	frameshift_variant	HIGH	ENSGALG00000051417
31	2219684	.	GCCCCCCCCC	GCCCCCCCCCC	frameshift_variant	HIGH	ENSGALG00000050005
3	7465935	.	TAG	T	frameshift_variant	HIGH	NRXN1
33	6342464	.	CGGGGGGGG	CGGGGGGGGG	frameshift_variant	HIGH	ENSGALG00000050539
17	1828415	.	CGGG	CGGGG	frameshift_variant	HIGH	BSPRY
28	1838246	.	AA	AAGA	frameshift_variant	HIGH	ZNF414
23	2538328	.	T	TG	frameshift_variant&splice_region_variant	HIGH	RHCE
21	4842065	.	G	GA	frameshift_variant	HIGH	PLA2G2E
30	1193065	.	GAA	GAAA	frameshift_variant	HIGH	ENSGALG00000050799
22	5164248	.	TTTTG	TTTTGGTTTG	frameshift_variant	HIGH	NT5DC4
3	41986235	.	GGTG	GG	frameshift_variant	HIGH	DACT2
2	98897355	.	GCC	GCCC	frameshift_variant	HIGH	RAB12
1	934045	.	G	GT	frameshift_variant	HIGH	ENSGALG00000047166
27	3971913	.	GCC	GCCC	frameshift_variant	HIGH	ENSGALG00000049293
14	15091151	.	CGCGGGGCGGGGCGGGGCGGGGCGG	CGCGGGGCGGGGCGGGGCGG	frameshift_variant	HIGH	IQCK
2	116427131	.	GC	GCC	frameshift_variant	HIGH	ENSGALG00000048280
1	77540457	.	CAAA	CAAAA	frameshift_variant	HIGH	FBXO40
15	5212808	.	CAAAAAA	CAAAAAAA	frameshift_variant	HIGH	ATP6V0A2
14	3626509	.	CGAGGAGGAGGAGGA	CGAGGAGGAGGAGGAGGA	start_lost&disruptive_inframe_insertion	HIGH	LFNG
6	3419056	rs734787983;rs794191774	GAAAAAAAAAAAA	GAAAAAAAAAA,GAAAAAAAAA,GAAAAAAAAAAA	frameshift_variant&start_lost	HIGH	SHLD2
2	34856	.	C	CGG	frameshift_variant	HIGH	ENSGALG00000047569
22	4010516	.	AGG	AGGG	frameshift_variant	HIGH	ENSGALG00000052712
9	1714637	.	TAAGA	TA	frameshift_variant&stop_lost&splice_region_variant	HIGH	UGGT1
14	13155068	.	C	CT	frameshift_variant	HIGH	NLRC3
22	3632657	.	CGGGGGG	CGGGGGGGGG,CGGGGGGGGGG	frameshift_variant	HIGH	UBE2S
32	99354	.	AGGGGGGGG	AGGGGGGGGG	splice_donor_variant&intron_variant	HIGH	NFKBIB
6	33728730	.	TG	TGG	frameshift_variant	HIGH	ENSGALG00000052052
14	13155067	.	AC	ACC	frameshift_variant	HIGH	NLRC3
26	5516983	.	CGGGGGG	CGGGGGGG	frameshift_variant	HIGH	ENSGALG00000052652
13	9237114	.	CG	CGG	frameshift_variant	HIGH	GRPEL2
14	13217450	.	C	CT	splice_acceptor_variant&splice_donor_variant&intron_variant	HIGH	CLUAP1
5	22242733	.	TGGG	TGGGG	splice_acceptor_variant&splice_donor_variant&intron_variant	HIGH	CD82
26	1326748	.	GCCCCCCCCC	GCCCCCCCC	frameshift_variant	HIGH	STRIP1
9	17689199	.	GA	GAA	splice_acceptor_variant&splice_donor_variant&intron_variant	HIGH	ZNF639
15	6946352	.	G	GC	splice_acceptor_variant&splice_donor_variant&intron_variant	HIGH	ALKBH2
21	4671465	.	A	AG	frameshift_variant&splice_region_variant	HIGH	EMC1
30	286266	.	TGGG	TGGGG	frameshift_variant	HIGH	TBC1D25
31	3022688	.	GCC	GCCC	frameshift_variant	HIGH	ENSGALG00000050921
1	19019152	.	CCC	CCCATCC	frameshift_variant	HIGH	ZBED4
1	197027680	.	CT	CTT	splice_acceptor_variant&splice_donor_variant&intron_variant	HIGH	ENSGALG00000051726
13	628561	.	CGGGGGGGGGG	CGGGGGGGGG,CGGGGGGGG	frameshift_variant	HIGH	PORCN
25	677803	.	CGGG	CGG	frameshift_variant&splice_region_variant	HIGH	LMNA
11	17914217	.	G	GGC	frameshift_variant	HIGH	KLHDC4
13	17597132	.	CGAGATGAGATGAGATGAGACGAGATGAGATGA	CGAGATGAGATGAGACGAGATGAGATGA	frameshift_variant	HIGH	IRF1
13	9520041	.	T	TG	frameshift_variant	HIGH	UBTD2
14	15201733	.	GAAAAAAA	GAAAAAAAA	frameshift_variant	HIGH	ENSGALG00000053304
2	112995267	.	AC	AGC	splice_acceptor_variant&splice_donor_variant&intron_variant	HIGH	CHD7
8	5451200	.	C	CG	splice_acceptor_variant&splice_donor_variant&intron_variant	HIGH	SCYL3
30	1477863	.	CGG	CGGG	frameshift_variant	HIGH	ENSGALG00000047412
13	9520040	.	CTT	CTTT	frameshift_variant	HIGH	UBTD2
6	21757895	.	A	AG	frameshift_variant&splice_region_variant	HIGH	IDE
15	105045	.	TCCC	TCCCC	frameshift_variant	HIGH	TAF6
5	16259692	.	AGG	AGGG	frameshift_variant	HIGH	ENSGALG00000039221
4	85439583	.	AC	ACC	frameshift_variant	HIGH	ENSGALG00000038160
33	6277123	.	CG	CGG	frameshift_variant	HIGH	ENSGALG00000048236
4	89326547	.	GTTTTT	GTTTTTT	frameshift_variant	HIGH	GFRA4
10	10865634	.	CG	CGG	frameshift_variant	HIGH	SECISBP2L
30	873446	.	AA	AACGAGA	frameshift_variant	HIGH	GIPC1
10	6679132	.	CTTTTTTTT	CTTTTTTTTTT	splice_acceptor_variant&intron_variant	HIGH	TARSL2
22	3740047	.	CT	CTT	frameshift_variant	HIGH	CNNM4
22	3740080	.	GCCCCCCC	GCCCCCCCC	frameshift_variant	HIGH	CNNM4
15	9470611	.	GCCCCCCCC	GCCCCCCCCC	frameshift_variant	HIGH	ACADS
31	919236	.	TGGGG	TGGGGG	frameshift_variant	HIGH	ENSGALG00000046743
1	137755575	.	GAA	GA	frameshift_variant	HIGH	ENSGALG00000052894
9	8664770	.	ATTTTT	ATTTTTT	splice_donor_variant&intron_variant	HIGH	DOCK10
2	316806	.	TGGGGGGG	TGGGGGGGG	frameshift_variant	HIGH	SLC4A2
4	44937092	rs737410075	GAAAAAAA	GAAAAAA	frameshift_variant	HIGH	PAQR3
21	623063	.	ACGGCGCGGCGCGGCGCGGC	ACGGCGCGGCGCGGCGCGGCGCGGC	frameshift_variant	HIGH	ACOT7
33	6490606	.	GTGGA	G	frameshift_variant	HIGH	RELA
2	3956307	.	GG	GGAG	frameshift_variant	HIGH	NBEAL2
17	5656015	.	TCCCCC	TCCCCCC	frameshift_variant	HIGH	SPOUT1
20	8451794	.	TCC	TCCC	splice_acceptor_variant&intron_variant	HIGH	SLC17A9
3	57554553	.	CGGACGGGACGGG	CGGACGGGACGGGACGGG	frameshift_variant	HIGH	AKAP7
20	10080692	.	TC	T	frameshift_variant	HIGH	TTLL9
28	1199332	.	TGGGG	TGGG	frameshift_variant	HIGH	ENSGALG00000054634
2	316464	.	CGGGGGGG	CGGGGGGGG	frameshift_variant	HIGH	SLC4A2
17	8609238	rs740355945	AC	A	frameshift_variant	HIGH	C5
9	4911596	.	AAGA	AA	frameshift_variant	HIGH	UBXN7
8	25600858	.	GCC	GCCC	frameshift_variant	HIGH	PARS2
7	35441628	.	GGCCGCCGCCGCCGCCGCC	GGCCGCCGCCGCCGCCGCCGCC	start_lost&conservative_inframe_insertion	HIGH	FMNL2
11	18602250	.	ACCCCCCCCCCCC	ACCTCCCCCCCCCCCC,ACCCCCCCCCC	frameshift_variant	HIGH	CDH15
26	1139020	.	CGGGGG	CGGGGGGG	frameshift_variant	HIGH	SHISA4
1	93648148	.	AC	ACC	frameshift_variant	HIGH	IGSF3
7	13588029	.	TCCCCCCC	TCCCCCCCC	frameshift_variant	HIGH	RAPH1
15	7052156	.	ACC	ACCC	frameshift_variant	HIGH	UBE3B
32	215847	.	TCCCCC	TCCCCCC	splice_donor_variant&intron_variant	HIGH	ENSGALG00000054495
1	16023567	.	TGG	TGGG	splice_donor_variant&intron_variant	HIGH	ENSGALG00000043355
28	3455641	.	GCCCCCCCC	GCCCCCCCCC	frameshift_variant	HIGH	KCNN1
21	3268607	rs740409858	GAAA	GAA	frameshift_variant	HIGH	GPR157
11	18764295	.	TG	TGAG	frameshift_variant	HIGH	CDK10
15	6945544	.	GC	GCC	frameshift_variant&splice_region_variant	HIGH	ALKBH2
7	15404200	.	CCT	CCTCT	frameshift_variant&splice_region_variant	HIGH	ENSGALG00000009149
1	129763921	.	C	CG	splice_acceptor_variant&splice_donor_variant&intron_variant	HIGH	ARSH
1	15408476	.	CT	C	frameshift_variant&splice_region_variant	HIGH	ABCD2
11	17639386	.	G	GC	frameshift_variant	HIGH	GSE1
30	278690	.	CG	CGG	frameshift_variant	HIGH	SUV39H1
3	104464992	.	CGGGGG	CGGGGGG	frameshift_variant	HIGH	ENSGALG00000052087
5	279356	.	G	GT	frameshift_variant	HIGH	TMEM132A
1	20570487	.	CTT	CTTT	frameshift_variant	HIGH	MAPK11
11	17380480	.	CA	CAA	frameshift_variant	HIGH	MTHFSD
1	135127149	.	TA	TAA	frameshift_variant&splice_region_variant	HIGH	IL1R1
11	7821430	.	TTTATT	TTT	stop_lost&conservative_inframe_deletion&splice_region_variant	HIGH	ORC6
4	37163496	.	CAAAAA	CAAAAAA	frameshift_variant	HIGH	SMARCAD1
14	13236584	.	CG	CGG	frameshift_variant	HIGH	ANKS3
3	38462674	.	G	GT	frameshift_variant	HIGH	ENSGALG00000052326
5	18770740	.	T	TA	frameshift_variant&stop_lost	HIGH	NAT10
33	6659168	.	AC	ACC	frameshift_variant	HIGH	ENSGALG00000049136
14	3643371	.	ACAAAACCAAAA	ACAAAA	splice_acceptor_variant&splice_region_variant&intron_variant	HIGH	ENSGALG00000047636
1	71798650	.	AGGG	AGGGG	frameshift_variant	HIGH	MANSC1
32	533331	.	TGGGGG	TGGGGGG	frameshift_variant	HIGH	ENSGALG00000048592
25	1453983	.	TG	TGG	frameshift_variant	HIGH	ENSGALG00000053555
2	343612	.	ACCC	ACCCC	frameshift_variant	HIGH	ABCB8
25	3705819	.	T	TC	frameshift_variant	HIGH	ENSGALG00000043416
6	21689512	.	A	AG	frameshift_variant&splice_region_variant	HIGH	KIF11
4	85603739	.	AATATAT	AATATATAT	frameshift_variant&splice_region_variant	HIGH	ENSGALG00000015805
32	305441	.	CGGGGGG	CGGGGGGGG,CGGGGGGGGG	frameshift_variant	HIGH	ENSGALG00000052101
5	9037895	.	GAAAAAAAA	GAAAAAAAAAA	frameshift_variant	HIGH	CTR9
6	24335898	.	GGTGTG	GGTG	frameshift_variant	HIGH	WBP1L
20	5227576	.	ATTCTTCT	ATTCTTCTTCT	splice_acceptor_variant&intron_variant	HIGH	ENSGALG00000004110
4	85439610	.	G	GA	frameshift_variant	HIGH	ENSGALG00000038160
4	69811426	.	CT	CTT	frameshift_variant&splice_region_variant	HIGH	PGM2
33	6997688	.	CGGGGGG	CGGGGGGGG	frameshift_variant	HIGH	NABP2
2	112995268	.	C	CT	frameshift_variant&splice_region_variant	HIGH	CHD7
22	4028978	.	CATCGTATCG	CATCG	frameshift_variant	HIGH	ENSGALG00000046830
15	7068076	.	TGAG	TGAGAG	frameshift_variant	HIGH	MMAB
4	49575563	.	CTT	C	frameshift_variant	HIGH	ENSGALG00000023172
1	7258589	.	TCCC	TCCCC	splice_acceptor_variant&intron_variant	HIGH	MCM10
27	7509910	.	CGCGCTGCGCTGCGCT	CGCGCTGCGCTGCGCTGCGCT	frameshift_variant	HIGH	NT5C3B
19	9461703	.	CTTTCTTTTT	CTTTT	frameshift_variant	HIGH	TNFAIP1
4	85314411	.	CGG	CG	frameshift_variant&splice_region_variant	HIGH	ATOH8
25	1460919	.	C	CCG	frameshift_variant	HIGH	ENSGALG00000055092
13	10861101	.	CC	CCAC	frameshift_variant	HIGH	PRR7
7	17976589	.	T	TC	frameshift_variant	HIGH	DYNC1I2
30	1374520	.	C	CCG	frameshift_variant	HIGH	ENSGALG00000041008
21	1910212	.	CGCGGGGCGGGGCGGGGCGG	CGCGGGGCGGGGCGG	frameshift_variant	HIGH	ENSGALG00000001304
33	7014289	.	GCCCCC	GCCCCCC	frameshift_variant	HIGH	SMARCC2
2	112945508	.	T	TC	frameshift_variant	HIGH	CHD7
2	76268951	rs1057975009	TA	TAA	splice_donor_variant&intron_variant	HIGH	OTULIN
25	3878791	.	CGGGGGG	CGGGGGGG	frameshift_variant	HIGH	IGSF9
32	289710	.	CGGGGGGGGG	CGGGGGGGGGG,CGGGGGGGGGGG	frameshift_variant	HIGH	HNRNPUL1
30	177548	.	AGGGGGGG	AGGGGGGGG	frameshift_variant	HIGH	CDC37
2	316609	.	CGGGGG	CGGGG	frameshift_variant	HIGH	SLC4A2
19	6333332	.	AT	ATT	frameshift_variant&stop_gained	HIGH	EFCAB5
1	135244747	.	G	GT	frameshift_variant	HIGH	IL18RAP
10	15117646	.	CA	CAA	frameshift_variant	HIGH	RGMA
5	337862	.	C	CCTA,CG	frameshift_variant	HIGH	ENSGALG00000039648
10	9570538	.	C	CG	splice_acceptor_variant&splice_donor_variant&intron_variant	HIGH	SCG3
25	2568733	.	CGGGGGG	CGGGGGGG	frameshift_variant	HIGH	ENSGALG00000052868
1	88748638	.	CTGTG	CTG	frameshift_variant	HIGH	IFT57
2	35429	.	C	CT	frameshift_variant	HIGH	ENSGALG00000047569
1	194425670	.	A	AG	frameshift_variant	HIGH	RSF1
30	1169223	.	TCCCC	TCCC	frameshift_variant	HIGH	HOOK2
13	17181163	.	TC	TCC	frameshift_variant	HIGH	ENSGALG00000029896
10	10937020	.	T	TA	frameshift_variant&splice_region_variant	HIGH	GALK2
13	13768315	.	TCCCC	TCCCCCC	frameshift_variant	HIGH	SMIM3
15	102315	.	AGGGG	AGGGGG	frameshift_variant	HIGH	TAF6
16	2727818	.	GCCCC	GCCCCC	frameshift_variant	HIGH	FLOT1
33	6276171	.	CGGGGGGGGG	CGGGGGGGG	frameshift_variant	HIGH	ENSGALG00000048236
33	6406631	.	CGGGGGGGG	CGGGGGGGGG	frameshift_variant	HIGH	ENSGALG00000047632
1	106583221	.	GAA	GAAA	frameshift_variant	HIGH	IFNAR2
1	6742986	.	A	AG	frameshift_variant&start_lost	HIGH	ENSGALG00000055058
1	135185740	.	TAAA	TAAAA	frameshift_variant&splice_region_variant	HIGH	IL1RL1
4	85439609	.	AGG	AGGG	frameshift_variant	HIGH	ENSGALG00000038160
6	20739116	.	AT	ATT	splice_acceptor_variant&splice_donor_variant&intron_variant	HIGH	TNKS2
31	3022654	.	GA	GAA	frameshift_variant	HIGH	ENSGALG00000050921
3	17138290	.	CAAAAAA	CAAAAAAA	frameshift_variant	HIGH	PARP1
2	111093501	.	AGG	AGGG,AGGGG	frameshift_variant&splice_region_variant	HIGH	TGS1
13	9251128	.	AGG	AG	frameshift_variant	HIGH	AFAP1L1
13	10955279	.	C	CG	splice_donor_variant&intron_variant	HIGH	ENSGALG00000002971
3	40788411	.	CGGGGG	CGGGGGG	frameshift_variant&splice_region_variant	HIGH	PDCD2
1	20667276	.	A	AG	frameshift_variant	HIGH	PLXNB2
1	129763055	.	CTT	CTTT	splice_acceptor_variant&splice_donor_variant&intron_variant	HIGH	ARSH
30	1209357	.	TGGGGGGGGGG	TGGGGGGGGGGG	frameshift_variant	HIGH	ENSGALG00000051159
12	3350704	.	GTTTTTTT	GTTTTTTTT,GTTTTTTTTTT	splice_acceptor_variant&intron_variant	HIGH	ALAS1
8	5193238	.	AGGGG	AGGGGG	splice_acceptor_variant&splice_donor_variant&intron_variant	HIGH	FMO3
4	8712418	.	G	GT	frameshift_variant	HIGH	ENSGALG00000042151
31	945561	.	ATTTT	ATTTTT	frameshift_variant	HIGH	ENSGALG00000045132
6	23504683	.	CGGGGGGGG	CGGGGGGGGG	frameshift_variant	HIGH	ARMH3
17	6245968	.	GA	G	frameshift_variant	HIGH	FUBP3
25	3749939	.	C	CA	frameshift_variant	HIGH	APH1A
4	90996607	.	GCCCCCCCCCCCCCCCCCC	GCCCCCCCCCC	frameshift_variant	HIGH	ENSGALG00000052156
14	1991470	rs739120832	CAAGAAGAA	CAAGAA	splice_acceptor_variant&splice_region_variant&intron_variant&non_coding_transcript_exon_variant	HIGH	ENSGALG00000050188
20	10086030	.	AGGGG	AGGG	frameshift_variant	HIGH	TTLL9
23	2539324	.	G	GCC	frameshift_variant	HIGH	RHCE
33	6777378	.	CA	CAA	frameshift_variant	HIGH	CACNG7
9	20107467	.	AGGGG	AGGGGG	frameshift_variant	HIGH	ENSGALG00000009409
1	190278501	.	GC	GCC	frameshift_variant	HIGH	FAM181B
5	478626	.	GCC	GCCC	frameshift_variant	HIGH	MYRF
10	3845793	.	TGT	TGTGAGT	frameshift_variant	HIGH	TMEM266
22	3626119	.	CGGGGGGGG	CGGGGGGGGG,CGGGGGGGGGG	frameshift_variant	HIGH	ISOC2
15	9566006	.	CGG	CGGG	frameshift_variant	HIGH	ENSGALG00000046877
4	45636092	rs731172467	CTTTTTTT	CTTTTTT	frameshift_variant	HIGH	PRKG2
1	80145093	.	GCC	GC	frameshift_variant	HIGH	TRIM45
15	11128109	.	GCC	GCCC	frameshift_variant	HIGH	ENSGALG00000007954
2	35336	.	GCC	GC	frameshift_variant	HIGH	ENSGALG00000047569
33	5406596	.	CGGG	CGGGG	frameshift_variant	HIGH	KRT18
7	17970205	.	CAAA	CAAAA	splice_acceptor_variant&splice_donor_variant&intron_variant	HIGH	DYNC1I2
1	197044340	.	GCC	GCCC	frameshift_variant	HIGH	NUP98
11	11443472	.	GC	GCC	frameshift_variant	HIGH	TK2
8	25003758	.	CC	CCACCGC	frameshift_variant	HIGH	MAGOH
28	2756021	.	CTTTTTTTTTTTTT	CTTTTTTTTTTTTTTT,CTTTTTTTTTTTTTT	splice_acceptor_variant&intron_variant	HIGH	ENSGALG00000001317
33	6910040	.	AGGG	AGGGG	splice_donor_variant&intron_variant	HIGH	ENSGALG00000052945
1	170683602	.	CGCCGAGCCGAGCCGAGCCG	CGCCGAGCCGAGCCGAGCCGAGCCG	frameshift_variant	HIGH	SPRYD7
8	5451199	.	C	CT	frameshift_variant&splice_region_variant	HIGH	SCYL3
2	115316684	.	A	AG	frameshift_variant&splice_region_variant	HIGH	COPS5
16	2565255	.	AC	A	frameshift_variant	HIGH	BLB1
33	6408091	.	A	AGC	frameshift_variant	HIGH	ENSGALG00000047632
17	4897239	.	CA	CAA	frameshift_variant	HIGH	ENSGALG00000048936
16	2442393	.	TGG	TG	splice_acceptor_variant&splice_region_variant&intron_variant	HIGH	KIFC1
30	915133	.	GC	GCC	frameshift_variant	HIGH	ENSGALG00000051163
14	6378620	.	GAAAAAAAAAAA	GAAAAAAAAAAAAA,GAAAAAAAAAAAAAA,GAAAAAAAAAAAA	frameshift_variant	HIGH	CHTF18
33	6059704	.	TCCC	TCCCC	frameshift_variant	HIGH	ENSGALG00000049272
1	20569152	.	AC	ACC	frameshift_variant&splice_region_variant	HIGH	MAPK11
3	30795954	.	AGGG	AGGGG	frameshift_variant	HIGH	VEGFA
2	107572410	.	T	TGG,TG	frameshift_variant	HIGH	MAPRE2
2	91466630	.	TGAGA	TGA	frameshift_variant	HIGH	ZNF407
4	60068651	.	CGG	CGGG	frameshift_variant	HIGH	ENSGALG00000051538
4	60068649	.	GCC	GCCC	frameshift_variant	HIGH	ENSGALG00000051538
17	3587959	.	ATTTTTTTTTTT	ATTTTTTTTTTTTT,ATTTTTTTTTTTTTT	frameshift_variant	HIGH	ENSGALG00000051635
1	75776312	.	AC	ACC	frameshift_variant	HIGH	ENSGALG00000036447
30	46590	.	CGGG	CGG	frameshift_variant	HIGH	ILF3
2	6408487	.	AGCCGCTGCCGCTGCCGC	AGCCGCTGCCGC	splice_acceptor_variant&conservative_inframe_deletion&splice_region_variant&intron_variant	HIGH	PRKAG2
22	7633	.	AG	AGTG	frameshift_variant	HIGH	ENSGALG00000052951
27	6538226	.	CGGGGGGGGG	CGGGGGGGGGG,CGGGGGGGGGGG	frameshift_variant	HIGH	TBX21
2	111093433	.	GA	GAA	frameshift_variant&splice_region_variant	HIGH	TGS1
2	78261383	.	AGG	AGGG	frameshift_variant	HIGH	SNRNP48
33	6277149	.	AGGG	AGGGG	frameshift_variant	HIGH	ENSGALG00000048236
2	115316683	.	CAA	CAAA	frameshift_variant&splice_region_variant	HIGH	COPS5
3	38462673	.	CGGG	CGGGG	frameshift_variant	HIGH	ENSGALG00000052326
3	101576601	.	CTTTTTTTTTTTTT	CTTTTTTTTTTTTTTT,CTTTTTTTTTTTTTTTT,CTTTTTTTTTTTTTT	frameshift_variant	HIGH	ENSGALG00000051739
17	7212405	.	TC	TCC	frameshift_variant	HIGH	ENSGALG00000033597
3	38552292	.	TG	TGG	frameshift_variant	HIGH	TARBP1
31	2265424	.	GGC	G	splice_donor_variant&intron_variant	HIGH	ENSGALG00000054294
21	4671466	.	CT	CTT	frameshift_variant&splice_region_variant	HIGH	EMC1
11	17010009	.	AG	AGG	splice_acceptor_variant&splice_donor_variant&intron_variant	HIGH	HNF4beta
25	3971161	.	GTTTT	GTTT	frameshift_variant	HIGH	NDUFS2
11	17914220	.	C	CCA	frameshift_variant&splice_region_variant	HIGH	KLHDC4
19	6932841	.	GAAAAA	GAAAAAA	frameshift_variant	HIGH	AKAP10
10	1093663	.	GCTGGAAGTCTGGAAGTCTGG	GCTGGAAGTCTGG	frameshift_variant	HIGH	ENSGALG00000046049
18	9897435	.	CGGGGGGGGGGG	CGGGGGGGGGGGG	frameshift_variant	HIGH	SLC25A10
27	7667725	.	G	GA	frameshift_variant	HIGH	KCNH4
33	6912364	.	ACCCCCC	ACCCCCCC	frameshift_variant	HIGH	ENSGALG00000052945
23	2162759	.	AG	AGG	frameshift_variant	HIGH	AHDC1
23	2164377	.	A	AT	frameshift_variant	HIGH	AHDC1
16	1873823	.	CTTTT	CTTTTT	frameshift_variant	HIGH	ENSGALG00000044472
28	879641	.	CA	C	frameshift_variant	HIGH	ENSGALG00000052918
28	1480833	.	GCC	GC	frameshift_variant	HIGH	FSD1
15	120469	.	CGGGGGGGGGG	CGGGGGGGGGGG,CGGGGGGGGGGGG	frameshift_variant	HIGH	NLGN2
6	20645228	.	T	TG	frameshift_variant	HIGH	HECTD2
4	73431261	.	AG	AGG	splice_acceptor_variant&splice_donor_variant&intron_variant	HIGH	SLC34A2
15	7052158	.	CA	CAA	splice_acceptor_variant&splice_donor_variant&intron_variant	HIGH	UBE3B
1	75876132	.	C	CT	splice_acceptor_variant&splice_donor_variant&intron_variant	HIGH	PHC1
5	337483	.	GTCCCCCCTCC	GTCC	frameshift_variant	HIGH	ENSGALG00000039648
14	12322394	.	A	AT	frameshift_variant&splice_region_variant	HIGH	KIAA0556
3	40163438	.	GAAAAAAA	GAAAAAAAA	frameshift_variant	HIGH	TAF5L
22	4050191	.	CGGGGGGGGG	CGGGGGGGG	frameshift_variant	HIGH	HK2
1	80504543	.	CAA	CAAA	frameshift_variant	HIGH	GTF2E1
3	16202610	.	ATTTTTTTTT	ATTTTTT,ATTTTTTTT,ATTTTTTT	frameshift_variant&stop_lost	HIGH	MRPS5
3	38176692	.	GATTAATTAATT	GATTAATT	frameshift_variant&stop_lost	HIGH	GGPS1
1	44869465	.	GAAAAAAAA	GAAAAAAAAA	frameshift_variant	HIGH	ENSGALG00000011285
13	17597055	.	CCTGTGCTGTGCTGTGCTGTGCTGTG	CCTGTGCTGTGCTGTGCTGTG,CCTGTGCTGTGCTGTGCTGTGCTGTGCTGTG	frameshift_variant	HIGH	IRF1
12	15729754	.	T	TC	frameshift_variant&splice_region_variant	HIGH	ARL6IP5
15	5743407	.	TGGCGGGC	TGGCGGGCGGGC	frameshift_variant	HIGH	ENSGALG00000040131
13	10808212	.	G	GT	frameshift_variant	HIGH	NHP2
9	17689198	.	AG	AGG	splice_acceptor_variant&splice_donor_variant&intron_variant	HIGH	ZNF639
11	7288304	.	GCC	GCCC	frameshift_variant&splice_region_variant	HIGH	N4BP1
4	69279444	.	GA	GAA	frameshift_variant	HIGH	LIAS

## Sheet: Functional_enrichment Boiler
#Term	Database	ID	Input number	Background number	P-Value	Corrected P-Value	Input	Hyperlink
Metabolic pathways	KEGG PATHWAY	gga01100	86	1290	1.33008e-06	0.00036258	AGK	CKB	GNPDA2	PCCA	GPAT2	P4HA2	P4HA1	GGPS1	SGPL1	CERS2	PIK3CA	MTMR4	GUSB	ENTPD2	HK2	CNDP2	PCYT1A	INPP5B	INPP5F	UCKL1	ACSL3	NME3	CSAD	ACLY	MMAB	ASL2	ACADS	AGXT	NMRK2	GPLD1	ACSBG2	CYP2U1	ISYNA1	CYP2J21	PLCH1	PDE5A	NUDT5	PGM2	TK2	DDC	GART	TKFC	ELOVL5
Herpes simplex virus 1 infection	KEGG PATHWAY	gga05168	18	150	5.34516e-05	0.00633518	BLB1	IFIH1	RELA	TBK1	PIK3CA	PTPN11	EIF2B2	CHUK	BID	IFNAR2	BF2	BF1	MTOR	IFNGR2	C3	ZNF767	RNASEL	C5	http://www.genome.jp/kegg-bin/show_pathway?gga05168/gga:424185%09red/gga:395236%09red/gga:423669%09red/gga:693256%09red/gga:425389%09red/gga:693260%09red/gga:417825%09red/gga:423359%09red/gga:395815%09red/gga:419455%09red/gga:396027%09red/gga:424410%09red/gga:418502%09red/gga:424971%09red/gga:420372%09red/gga:417122%09red/gga:396370%09red/gga:395664%09red
Fatty acid biosynthesis	KEGG PATHWAY	gga00061	6	17	0.000147952	0.0130103	HTD2	ACSL3	OXSM	FASN	ACSBG2	MECR	http://www.genome.jp/kegg-bin/show_pathway?gga00061/gga:424810%09red/gga:420090%09red/gga:420656%09red/gga:419601%09red/gga:396061%09red/gga:112533344%09red
Influenza A	KEGG PATHWAY	gga05164	16	135	0.000155497	0.0132464	IL18	BLB1	IFIH1	TBK1	NUP98	NFKBIB	PIK3CA	BID	CHUK	IFNAR2	TNFRSF10B	RAB11B	IFNGR2	RELA	RNASEL	HNRNPUL1	http://www.genome.jp/kegg-bin/show_pathway?gga05164/gga:395312%09red/gga:423669%09red/gga:693256%09red/gga:430616%09red/gga:417825%09red/gga:395236%09red/gga:776596%09red/gga:396027%09red/gga:373904%09red/gga:424410%09red/gga:100858419%09red/gga:420063%09red/gga:418502%09red/gga:424971%09red/gga:424185%09red/gga:395664%09red
Fatty acid metabolism	KEGG PATHWAY	gga01212	9	53	0.000434401	0.0288824	ACADS	HTD2	ACSL3	OXSM	ELOVL5	FASN	ACSBG2	ELOVL1	MECR	http://www.genome.jp/kegg-bin/show_pathway?gga01212/gga:424810%09red/gga:420090%09red/gga:428646%09red/gga:420656%09red/gga:416969%09red/gga:419601%09red/gga:396061%09red/gga:424564%09red/gga:112533344%09red
Carbon metabolism	KEGG PATHWAY	gga01200	12	102	0.00105907	0.0548181	IDH3A	ACADS	HK2	DLST	SUCLA2	PCCA	PGLS	TKFC	ENO1	MDH2	MDH1	AGXT	http://www.genome.jp/kegg-bin/show_pathway?gga01200/gga:423357%09red/gga:374044%09red/gga:430442%09red/gga:417517%09red/gga:416969%09red/gga:396017%09red/gga:426629%09red/gga:770344%09red/gga:418774%09red/gga:415362%09red/gga:421281%09red/gga:418857%09red
Citrate cycle (TCA cycle)	KEGG PATHWAY	gga00020	6	28	0.00139373	0.0655053	IDH3A	DLST	SUCLA2	MDH2	MDH1	ACLY	http://www.genome.jp/kegg-bin/show_pathway?gga00020/gga:423357%09red/gga:417517%09red/gga:421281%09red/gga:415362%09red/gga:395373%09red/gga:418857%09red
NOD-like receptor signaling pathway	KEGG PATHWAY	gga04621	13	124	0.00174221	0.0747987	IL18	TBK1	ANTXR2	NFKBIB	CHUK	IFNAR2	CYBA	MAPK11	VDAC3	PANX1	RELA	ITPR1	RNASEL	http://www.genome.jp/kegg-bin/show_pathway?gga04621/gga:426793%09red/gga:395312%09red/gga:772164%09red/gga:423669%09red/gga:422580%09red/gga:417825%09red/gga:396027%09red/gga:424410%09red/gga:100858419%09red/gga:417739%09red/gga:395412%09red/gga:395664%09red/gga:100859840%09red
Arginine and proline metabolism	KEGG PATHWAY	gga00330	7	42	0.00204835	0.0775529	L3HYPDH	SMOX	CKB	P4HA2	P4HA1	ALDH9A1	CNDP2	http://www.genome.jp/kegg-bin/show_pathway?gga00330/gga:422934%09red/gga:416326%09red/gga:423531%09red/gga:421013%09red/gga:423704%09red/gga:424405%09red/gga:396248%09red
Ribosome	KEGG PATHWAY	gga03010	12	120	0.00366885	0.0956673	MRPL10	RPLP0	MRPL21	RPS16	MRPL18	MRPS5	RSL24D1	MRPL28	RPS15A	FAU	RPL36	MRPL1	http://www.genome.jp/kegg-bin/show_pathway?gga03010/gga:417871%09red/gga:423000%09red/gga:426121%09red/gga:101749142%09red/gga:395835%09red/gga:416706%09red/gga:422507%09red/gga:421585%09red/gga:768911%09red/gga:426521%09red/gga:373936%09red/gga:427675%09red
Adipocytokine signaling pathway	KEGG PATHWAY	gga04920	8	64	0.0050227	0.114099	NFKBIB	ACSL3	PTPN11	PRKAG2	CHUK	MTOR	ACSBG2	RELA	http://www.genome.jp/kegg-bin/show_pathway?gga04920/gga:424810%09red/gga:420090%09red/gga:423669%09red/gga:100858419%09red/gga:395815%09red/gga:396027%09red/gga:420435%09red/gga:419455%09red
Lysosome	KEGG PATHWAY	gga04142	11	110	0.00528934	0.117096	DNASE2B	ACP5	CTSO	PSAP	LAPTM5	GGA3	SMPD1	ATP6V0A2	CLTCL1	ABCA2	GUSB	http://www.genome.jp/kegg-bin/show_pathway?gga04142/gga:416765%09red/gga:419552%09red/gga:395602%09red/gga:427823%09red/gga:395473%09red/gga:424540%09red/gga:426955%09red/gga:422410%09red/gga:419077%09red/gga:107057619%09red/gga:422121%09red
Cellular senescence	KEGG PATHWAY	gga04218	13	143	0.00536938	0.117096	RBL1	PIK3CA	RASSF5	MRAS	RB1	BF2	BF1	MTOR	MAPK11	CAPN1	VDAC3	RELA	ITPR1	http://www.genome.jp/kegg-bin/show_pathway?gga04218/gga:426793%09red/gga:693249%09red/gga:419126%09red/gga:693260%09red/gga:425389%09red/gga:419844%09red/gga:386582%09red/gga:395149%09red/gga:417739%09red/gga:396027%09red/gga:424971%09red/gga:395412%09red/gga:419455%09red
Apoptosis	KEGG PATHWAY	gga04210	12	127	0.00555046	0.11757	CTSO	SPTAN1	BID	PARP1	PARP3	CHUK	TNFRSF10B	CAPN1	PIK3CA	RELA	ITPR1	BIRC5	http://www.genome.jp/kegg-bin/show_pathway?gga04210/gga:693249%09red/gga:374078%09red/gga:423669%09red/gga:422410%09red/gga:395236%09red/gga:396027%09red/gga:373904%09red/gga:396199%09red/gga:374234%09red/gga:771158%09red/gga:395412%09red/gga:424971%09red
Lysine degradation	KEGG PATHWAY	gga00310	7	54	0.00710723	0.129162	PHYKPL	KMT2D	SUV39H1	DLST	PLOD2	EZH2	ALDH9A1	http://www.genome.jp/kegg-bin/show_pathway?gga00310/gga:423357%09red/gga:100857640%09red/gga:424882%09red/gga:424405%09red/gga:420784%09red/gga:425846%09red/gga:416374%09red
RNA transport	KEGG PATHWAY	gga03013	12	132	0.00731175	0.13113	NUP107	EIF4G3	EIF4G1	NUP98	EIF2B2	UPF3B	TGS1	RPP14	NUP214	NUP210	SEC13	THOC5	http://www.genome.jp/kegg-bin/show_pathway?gga03013/gga:415977%09red/gga:421126%09red/gga:424953%09red/gga:417019%09red/gga:425544%09red/gga:101751988%09red/gga:416119%09red/gga:423359%09red/gga:430616%09red/gga:416064%09red/gga:427760%09red/gga:100858231%09red
Phagosome	KEGG PATHWAY	gga04145	12	132	0.00731175	0.13113	MRC1	RAB5A	DYNC1LI2	BLB1	DYNC1I2	BF2	BF1	CYBA	ATP6V0A2	C3	ITGB5	SEC61A2	http://www.genome.jp/kegg-bin/show_pathway?gga04145/gga:420649%09red/gga:693260%09red/gga:693256%09red/gga:425389%09red/gga:395473%09red/gga:426369%09red/gga:415793%09red/gga:424151%09red/gga:395142%09red/gga:420516%09red/gga:396370%09red/gga:100859840%09red
Protein processing in endoplasmic reticulum	KEGG PATHWAY	gga04141	13	153	0.00890641	0.142817	DNAJA2	HERPUD1	PDIA6	SEC13	HSP90B1	SSR1	CAPN1	SAR1B	UBXN6	NGLY1	CUL1	SEC61A2	UGGT1	http://www.genome.jp/kegg-bin/show_pathway?gga04141/gga:421940%09red/gga:374163%09red/gga:693249%09red/gga:415644%09red/gga:428329%09red/gga:424757%09red/gga:416119%09red/gga:416314%09red/gga:420655%09red/gga:420783%09red/gga:426369%09red/gga:420871%09red/gga:415744%09red
RIG-I-like receptor signaling pathway	KEGG PATHWAY	gga04622	7	57	0.0092053	0.143756	IFIH1	TBK1	NFKBIB	CHUK	TKFC	MAPK11	RELA	http://www.genome.jp/kegg-bin/show_pathway?gga04622/gga:423669%09red/gga:100858419%09red/gga:426629%09red/gga:396027%09red/gga:417825%09red/gga:417739%09red/gga:424185%09red
Endocytosis	KEGG PATHWAY	gga04144	17	228	0.00998416	0.149786	RAB11FIP3	VPS36	ARAP3	EHD2	SNX4	GRK6	ARPC1A	IL2RG	VPS37C	VPS37A	BF2	BF1	RAB11B	CLTCL1	RAB5A	STAM	SH3KBP1	http://www.genome.jp/kegg-bin/show_pathway?gga04144/gga:420649%09red/gga:100857269%09red/gga:418883%09red/gga:107049991%09red/gga:418608%09red/gga:693260%09red/gga:425389%09red/gga:423023%09red/gga:416765%09red/gga:422732%09red/gga:395199%09red/gga:770269%09red/gga:420063%09red/gga:420517%09red/gga:424260%09red/gga:416196%09red/gga:416361%09red
Cytosolic DNA-sensing pathway	KEGG PATHWAY	gga04623	6	44	0.0100004	0.149786	IL18	TBK1	NFKBIB	CHUK	RELA	POLR2H	http://www.genome.jp/kegg-bin/show_pathway?gga04623/gga:395312%09red/gga:424954%09red/gga:423669%09red/gga:100858419%09red/gga:396027%09red/gga:417825%09red
Fatty acid degradation	KEGG PATHWAY	gga00071	5	33	0.0124892	0.1658	ACSL3	ECI1	ACADS	ALDH9A1	ACSBG2	http://www.genome.jp/kegg-bin/show_pathway?gga00071/gga:416657%09red/gga:420090%09red/gga:416969%09red/gga:424405%09red/gga:424810%09red
Protein export	KEGG PATHWAY	gga03060	4	23	0.0165608	0.191291	SRP72	SRP54	SEC61A2	SRPRA	http://www.genome.jp/kegg-bin/show_pathway?gga03060/gga:423322%09red/gga:422626%09red/gga:419713%09red/gga:426369%09red
Cell cycle	KEGG PATHWAY	gga04110	10	114	0.0168635	0.193966	MAD2L2	ZBTB17	RBL1	ORC6	RB1	PRKDC	MCM2	CDC45	PTTG2	CUL1	http://www.genome.jp/kegg-bin/show_pathway?gga04110/gga:416027%09red/gga:419126%09red/gga:395376%09red/gga:419493%09red/gga:386582%09red/gga:396541%09red/gga:415749%09red/gga:416776%09red/gga:420783%09red/gga:416158%09red
ECM-receptor interaction	KEGG PATHWAY	gga04512	8	83	0.0194343	0.214733	ITGA8	LAMA1	HSPG2	ITGB5	ITGA3	SDC4	GP1BB	VWF	http://www.genome.jp/kegg-bin/show_pathway?gga04512/gga:429806%09red/gga:419184%09red/gga:396225%09red/gga:419031%09red/gga:107051576%09red/gga:374016%09red/gga:395142%09red/gga:373946%09red
Fatty acid elongation	KEGG PATHWAY	gga00062	4	25	0.0211512	0.214915	ACOT7	ELOVL5	ELOVL1	MECR	http://www.genome.jp/kegg-bin/show_pathway?gga00062/gga:419601%09red/gga:424564%09red/gga:419371%09red/gga:428646%09red
Salmonella infection	KEGG PATHWAY	gga05132	7	70	0.0236931	0.214915	IL18	IFNGR2	ARPC1A	DYNC1I2	MAPK11	DYNC1LI2	RELA	http://www.genome.jp/kegg-bin/show_pathway?gga05132/gga:395312%09red/gga:415793%09red/gga:396027%09red/gga:417739%09red/gga:418502%09red/gga:424151%09red/gga:770269%09red
C-type lectin receptor signaling pathway	KEGG PATHWAY	gga04625	8	87	0.0244837	0.214915	IRF1	PIK3CA	PTPN11	MRAS	CHUK	MAPK11	RELA	ITPR1	http://www.genome.jp/kegg-bin/show_pathway?gga04625/gga:423669%09red/gga:396027%09red/gga:395815%09red/gga:395149%09red/gga:417739%09red/gga:396384%09red/gga:424971%09red/gga:395412%09red
Cell adhesion molecules (CAMs)	KEGG PATHWAY	gga04514	10	122	0.0248857	0.214915	ITGA8	BLB1	CDH15	GLG1	ALCAM	SDC4	NRXN1	BF2	BF1	NCAM1	http://www.genome.jp/kegg-bin/show_pathway?gga04514/gga:419184%09red/gga:395398%09red/gga:693260%09red/gga:693256%09red/gga:425389%09red/gga:107054331%09red/gga:396092%09red/gga:396492%09red/gga:396225%09red/gga:428253%09red
Inositol phosphate metabolism	KEGG PATHWAY	gga00562	7	71	0.0252289	0.214915	INPP5B	ISYNA1	INPPL1	PIK3CA	PLCH1	MTMR4	INPP5F	http://www.genome.jp/kegg-bin/show_pathway?gga00562/gga:107055367%09red/gga:423932%09red/gga:425030%09red/gga:428692%09red/gga:417472%09red/gga:419609%09red/gga:424971%09red
Phosphatidylinositol signaling system	KEGG PATHWAY	gga04070	8	91	0.0303863	0.229361	INPP5B	ITPR1	INPP5F	INPPL1	PIK3CA	PPIP5K1	MTMR4	DGKE	http://www.genome.jp/kegg-bin/show_pathway?gga04070/gga:423932%09red/gga:770911%09red/gga:415587%09red/gga:428692%09red/gga:417472%09red/gga:419609%09red/gga:424971%09red/gga:395412%09red
beta-Alanine metabolism	KEGG PATHWAY	gga00410	4	29	0.0324724	0.229361	ACADS	SMOX	CNDP2	ALDH9A1	http://www.genome.jp/kegg-bin/show_pathway?gga00410/gga:421013%09red/gga:422934%09red/gga:416969%09red/gga:424405%09red
Adrenergic signaling in cardiomyocytes	KEGG PATHWAY	gga04261	10	128	0.0324815	0.229361	ATP2A3	CACNB1	TPM3	CREB3L2	ADRB1	MAPK11	CACNG7	AGT	GNAI3	ATF2	http://www.genome.jp/kegg-bin/show_pathway?gga04261/gga:395707%09red/gga:421543%09red/gga:418123%09red/gga:374097%09red/gga:107050634%09red/gga:101750705%09red/gga:417739%09red/gga:770103%09red/gga:395727%09red/gga:777366%09red
Pyrimidine metabolism	KEGG PATHWAY	gga00240	6	59	0.0327746	0.229361	NME3	UCKL1	NT5C3B	TK2	NT5DC4	DUT	http://www.genome.jp/kegg-bin/show_pathway?gga00240/gga:769338%09red/gga:427551%09red/gga:100858617%09red/gga:416399%09red/gga:420034%09red/gga:419255%09red
Notch signaling pathway	KEGG PATHWAY	gga04330	5	44	0.0341282	0.236726	DLL1	APH1A	LFNG	DLL4	CTBP1	http://www.genome.jp/kegg-bin/show_pathway?gga04330/gga:423208%09red/gga:395820%09red/gga:431243%09red/gga:422904%09red/gga:395790%09red
Biosynthesis of unsaturated fatty acids	KEGG PATHWAY	gga01040	4	30	0.0357603	0.245011	ACOT7	ELOVL5	BAAT	ELOVL1	http://www.genome.jp/kegg-bin/show_pathway?gga01040/gga:424564%09red/gga:769879%09red/gga:419371%09red/gga:428646%09red
Glyoxylate and dicarboxylate metabolism	KEGG PATHWAY	gga00630	4	31	0.0392335	0.247386	PCCA	AGXT	MDH2	MDH1	http://www.genome.jp/kegg-bin/show_pathway?gga00630/gga:770344%09red/gga:417517%09red/gga:418774%09red/gga:421281%09red
Propanoate metabolism	KEGG PATHWAY	gga00640	4	32	0.0428922	0.25145	PCCA	SUCLA2	ACADS	LDHA	http://www.genome.jp/kegg-bin/show_pathway?gga00640/gga:418857%09red/gga:416969%09red/gga:396221%09red/gga:418774%09red
Pyruvate metabolism	KEGG PATHWAY	gga00620	4	32	0.0428922	0.25145	MDH2	LDHA	MDH1	ALDH9A1	http://www.genome.jp/kegg-bin/show_pathway?gga00620/gga:417517%09red/gga:424405%09red/gga:396221%09red/gga:421281%09red
Proteasome	KEGG PATHWAY	gga03050	4	35	0.0549786	0.282777	PSMC1	POMP	PSMC6	PSMA3	http://www.genome.jp/kegg-bin/show_pathway?gga03050/gga:423586%09red/gga:395804%09red/gga:418925%09red/gga:423542%09red
Purine metabolism	KEGG PATHWAY	gga00230	9	125	0.0610812	0.286095	ENTPD2	NME3	NUDT5	PGM2	NT5C3B	PRUNE1	GART	NT5DC4	PDE5A	http://www.genome.jp/kegg-bin/show_pathway?gga00230/gga:426435%09red/gga:427053%09red/gga:395315%09red/gga:426368%09red/gga:422677%09red/gga:100858617%09red/gga:416399%09red/gga:395797%09red/gga:420034%09red
Glycolysis / Gluconeogenesis	KEGG PATHWAY	gga00010	5	53	0.062833	0.292848	HK2	ENO1	LDHA	PGM2	ALDH9A1	http://www.genome.jp/kegg-bin/show_pathway?gga00010/gga:426435%09red/gga:374044%09red/gga:424405%09red/gga:396221%09red/gga:396017%09red
AGE-RAGE signaling pathway in diabetic complications	KEGG PATHWAY	gga04933	7	90	0.0681136	0.300566	PIK3CA	VEGFA	NOX4	COL3A1	RELA	AGT	MAPK11	http://www.genome.jp/kegg-bin/show_pathway?gga04933/gga:419012%09red/gga:421543%09red/gga:395909%09red/gga:396340%09red/gga:396027%09red/gga:417739%09red/gga:424971%09red
Taurine and hypotaurine metabolism	KEGG PATHWAY	gga00430	2	10	0.0705399	0.300566	BAAT	CSAD	http://www.genome.jp/kegg-bin/show_pathway?gga00430/gga:426184%09red/gga:769879%09red
Focal adhesion	KEGG PATHWAY	gga04510	12	189	0.0707864	0.300566	ERBB2	ITGA8	ITGB5	ACTN4	PIK3CA	ITGA3	MYLK3	LAMA1	CTNNB1	VEGFA	PARVB	VWF	http://www.genome.jp/kegg-bin/show_pathway?gga04510/gga:395964%09red/gga:395909%09red/gga:418235%09red/gga:426130%09red/gga:374016%09red/gga:419031%09red/gga:415748%09red/gga:396024%09red/gga:396225%09red/gga:395142%09red/gga:424971%09red/gga:373946%09red
Tryptophan metabolism	KEGG PATHWAY	gga00380	4	39	0.073641	0.310751	DDC	DLST	ACMSD	ALDH9A1	http://www.genome.jp/kegg-bin/show_pathway?gga00380/gga:423357%09red/gga:424288%09red/gga:424405%09red/gga:420947%09red
Necroptosis	KEGG PATHWAY	gga04217	9	131	0.0758788	0.316534	IFNGR2	BID	PARP1	PARP3	IFNAR2	TNFRSF10B	SMPD1	CAPN1	VDAC3	http://www.genome.jp/kegg-bin/show_pathway?gga04217/gga:426793%09red/gga:693249%09red/gga:395236%09red/gga:373904%09red/gga:396199%09red/gga:419077%09red/gga:418502%09red/gga:771158%09red/gga:395664%09red
ABC transporters	KEGG PATHWAY	gga02010	4	40	0.0787486	0.319656	ABCD2	ABCB8	ABCA2	ABCC1	http://www.genome.jp/kegg-bin/show_pathway?gga02010/gga:417694%09red/gga:426955%09red/gga:107055879%09red/gga:395416%09red
Drug metabolism - other enzymes	KEGG PATHWAY	gga00983	5	57	0.0789064	0.319656	DUT	NME3	GUSB	TK2	UCKL1	http://www.genome.jp/kegg-bin/show_pathway?gga00983/gga:427551%09red/gga:427823%09red/gga:769338%09red/gga:416399%09red/gga:419255%09red
Mitophagy - animal	KEGG PATHWAY	gga04137	5	58	0.0832381	0.320809	RELA	AMBRA1	OPTN	MRAS	TBK1	http://www.genome.jp/kegg-bin/show_pathway?gga04137/gga:423194%09red/gga:395149%09red/gga:396027%09red/gga:417825%09red/gga:374079%09red
MAPK signaling pathway	KEGG PATHWAY	gga04010	15	261	0.0894614	0.339156	ERBB2	RASGRP3	MAP4K3	RELA	STMN1	CACNB1	MRAS	CHUK	VEGFA	MAPK11	NLK	CACNG7	FLT3	IL1R1	ATF2	http://www.genome.jp/kegg-bin/show_pathway?gga04010/gga:417669%09red/gga:396481%09red/gga:777366%09red/gga:395909%09red/gga:423669%09red/gga:100858422%09red/gga:426130%09red/gga:425965%09red/gga:421460%09red/gga:107050634%09red/gga:395149%09red/gga:417739%09red/gga:396027%09red/gga:396057%09red/gga:395727%09red
Glycerolipid metabolism	KEGG PATHWAY	gga00561	5	60	0.0922693	0.339156	GPAT2	AGK	ALDH9A1	TKFC	DGKE	http://www.genome.jp/kegg-bin/show_pathway?gga00561/gga:770911%09red/gga:426629%09red/gga:418121%09red/gga:426550%09red/gga:424405%09red
Peroxisome	KEGG PATHWAY	gga04146	6	79	0.0948271	0.346074	SOD1	ACSL3	PEX6	AGXT	ABCD2	BAAT	http://www.genome.jp/kegg-bin/show_pathway?gga04146/gga:769879%09red/gga:417694%09red/gga:424810%09red/gga:770344%09red/gga:416709%09red/gga:395938%09red
mTOR signaling pathway	KEGG PATHWAY	gga04150	9	140	0.101858	0.360638	RRAGD	LRP6	LRP5	PIK3CA	SEC13	CHUK	CLIP1	MTOR	LAMTOR5	http://www.genome.jp/kegg-bin/show_pathway?gga04150/gga:423114%09red/gga:107053109%09red/gga:423669%09red/gga:416119%09red/gga:395784%09red/gga:419811%09red/gga:424971%09red/gga:419455%09red/gga:419097%09red
Wnt signaling pathway	KEGG PATHWAY	gga04310	9	141	0.105024	0.360638	PORCN	TCF7	LRP6	LRP5	CTNNB1	PPARD	CTBP1	NLK	CUL1	http://www.genome.jp/kegg-bin/show_pathway?gga04310/gga:423114%09red/gga:107050792%09red/gga:395229%09red/gga:417669%09red/gga:395479%09red/gga:420783%09red/gga:422904%09red/gga:395964%09red/gga:419097%09red
Insulin signaling pathway	KEGG PATHWAY	gga04910	8	121	0.105991	0.361615	INPPL1	HK2	PIK3CA	PRKAG2	MTOR	FLOT1	FLOT2	FASN	http://www.genome.jp/kegg-bin/show_pathway?gga04910/gga:374044%09red/gga:417579%09red/gga:428692%09red/gga:396061%09red/gga:424971%09red/gga:420435%09red/gga:101751397%09red/gga:419455%09red
Base excision repair	KEGG PATHWAY	gga03410	3	29	0.113455	0.380416	PARP1	NEIL3	PARP3	http://www.genome.jp/kegg-bin/show_pathway?gga03410/gga:771158%09red/gga:396199%09red/gga:428750%09red
Toll-like receptor signaling pathway	KEGG PATHWAY	gga04620	6	84	0.116304	0.380866	TBK1	PIK3CA	CHUK	IFNAR2	MAPK11	RELA	http://www.genome.jp/kegg-bin/show_pathway?gga04620/gga:423669%09red/gga:417825%09red/gga:396027%09red/gga:417739%09red/gga:424971%09red/gga:395664%09red
Ribosome biogenesis in eukaryotes	KEGG PATHWAY	gga03008	5	67	0.127572	0.399929	EFL1	REXO5	MPHOSPH10	NHP2	NAT10	http://www.genome.jp/kegg-bin/show_pathway?gga03008/gga:426609%09red/gga:427001%09red/gga:415384%09red/gga:415467%09red/gga:416218%09red
Ubiquitin mediated proteolysis	KEGG PATHWAY	gga04120	8	127	0.128044	0.399929	BRCA1	WWP2	UBE3B	CUL1	UBE2F	TRIP12	DDB1	UBE2S	http://www.genome.jp/kegg-bin/show_pathway?gga04120/gga:374050%09red/gga:107050834%09red/gga:415868%09red/gga:776286%09red/gga:373983%09red/gga:424015%09red/gga:420783%09red/gga:424785%09red
DNA replication	KEGG PATHWAY	gga03030	3	31	0.129856	0.399986	RFC1	MCM2	RNASEH2B	http://www.genome.jp/kegg-bin/show_pathway?gga03030/gga:416027%09red/gga:418874%09red/gga:422788%09red
Nicotinate and nicotinamide metabolism	KEGG PATHWAY	gga00760	3	31	0.129856	0.399986	NT5DC4	NMRK2	NT5C3B	http://www.genome.jp/kegg-bin/show_pathway?gga00760/gga:100858798%09red/gga:100858617%09red/gga:420034%09red
N-Glycan biosynthesis	KEGG PATHWAY	gga00510	4	49	0.132017	0.403903	DOLPP1	MGAT5B	MGAT4A	FUT8	http://www.genome.jp/kegg-bin/show_pathway?gga00510/gga:417196%09red/gga:427801%09red/gga:423178%09red/gga:418692%09red
Arachidonic acid metabolism	KEGG PATHWAY	gga00590	4	49	0.132017	0.403903	LTA4H	PLA2G2E	CYP2J21	CYP2U1	http://www.genome.jp/kegg-bin/show_pathway?gga00590/gga:426747%09red/gga:422528%09red/gga:101750603%09red/gga:417918%09red
Fanconi anemia pathway	KEGG PATHWAY	gga03460	4	50	0.138674	0.41935	BRCA1	FANCA	FANCD2	FANCB	http://www.genome.jp/kegg-bin/show_pathway?gga03460/gga:418628%09red/gga:373983%09red/gga:415854%09red/gga:415935%09red
Glycosaminoglycan biosynthesis - keratan sulfate	KEGG PATHWAY	gga00533	2	16	0.14168	0.41935	FUT8	CHST6	http://www.genome.jp/kegg-bin/show_pathway?gga00533/gga:770257%09red/gga:423178%09red
Adherens junction	KEGG PATHWAY	gga04520	5	70	0.14434	0.425374	ERBB2	CTNNB1	TCF7	NLK	ACTN4	http://www.genome.jp/kegg-bin/show_pathway?gga04520/gga:417669%09red/gga:426130%09red/gga:395229%09red/gga:395964%09red/gga:396024%09red
Ferroptosis	KEGG PATHWAY	gga04216	3	34	0.155879	0.439428	VDAC3	MAP1LC3A	ACSL3	http://www.genome.jp/kegg-bin/show_pathway?gga04216/gga:419142%09red/gga:424810%09red/gga:426793%09red
Autophagy - animal	KEGG PATHWAY	gga04140	7	117	0.176052	0.445462	RRAGD	MTMR4	PIK3CA	AMBRA1	MRAS	MTOR	ITPR1	http://www.genome.jp/kegg-bin/show_pathway?gga04140/gga:107053109%09red/gga:395149%09red/gga:417472%09red/gga:423194%09red/gga:424971%09red/gga:395412%09red/gga:419455%09red
Terpenoid backbone biosynthesis	KEGG PATHWAY	gga00900	2	19	0.181215	0.445462	ICMT	GGPS1	http://www.genome.jp/kegg-bin/show_pathway?gga00900/gga:419373%09red/gga:427092%09red
Basal transcription factors	KEGG PATHWAY	gga03022	3	38	0.192772	0.445462	TAF6	TAF5L	GTF2E1	http://www.genome.jp/kegg-bin/show_pathway?gga03022/gga:107050330%09red/gga:421538%09red/gga:418328%09red
Homologous recombination	KEGG PATHWAY	gga03440	3	38	0.192772	0.445462	BRCA1	XRCC3	TOPBP1	http://www.genome.jp/kegg-bin/show_pathway?gga03440/gga:420694%09red/gga:423485%09red/gga:373983%09red
Nucleotide excision repair	KEGG PATHWAY	gga03420	3	38	0.192772	0.445462	DDB1	RFC1	ERCC5	http://www.genome.jp/kegg-bin/show_pathway?gga03420/gga:374050%09red/gga:428019%09red/gga:422788%09red
Neomycin, kanamycin and gentamicin biosynthesis	KEGG PATHWAY	gga00524	1	5	0.202378	0.445462	HK2	http://www.genome.jp/kegg-bin/show_pathway?gga00524/gga:374044%09red
Regulation of actin cytoskeleton	KEGG PATHWAY	gga04810	10	190	0.207677	0.445462	ITGA8	ITGA3	ITGB5	DIAPH3	PIK3CA	ARPC1A	ACTN4	MRAS	MYLK3	SCIN	http://www.genome.jp/kegg-bin/show_pathway?gga04810/gga:396225%09red/gga:415748%09red/gga:396024%09red/gga:395149%09red/gga:424971%09red/gga:770269%09red/gga:395142%09red/gga:418824%09red/gga:373946%09red/gga:420588%09red
Histidine metabolism	KEGG PATHWAY	gga00340	2	21	0.208377	0.445462	ALDH9A1	CNDP2	http://www.genome.jp/kegg-bin/show_pathway?gga00340/gga:421013%09red/gga:424405%09red
Other types of O-glycan biosynthesis	KEGG PATHWAY	gga00514	2	22	0.222111	0.445462	OGT	LFNG	http://www.genome.jp/kegg-bin/show_pathway?gga00514/gga:422203%09red/gga:395790%09red
Porphyrin and chlorophyll metabolism	KEGG PATHWAY	gga00860	2	23	0.235914	0.448154	MMAB	GUSB	http://www.genome.jp/kegg-bin/show_pathway?gga00860/gga:427823%09red/gga:100859013%09red
Mannose type O-glycan biosynthesis	KEGG PATHWAY	gga00515	2	23	0.235914	0.448154	MGAT5B	B3GALNT2	http://www.genome.jp/kegg-bin/show_pathway?gga00515/gga:430770%09red/gga:427801%09red
Aminoacyl-tRNA biosynthesis	KEGG PATHWAY	gga00970	3	43	0.24146	0.448526	TARSL2	GARS	PARS2	http://www.genome.jp/kegg-bin/show_pathway?gga00970/gga:415389%09red/gga:428403%09red/gga:424659%09red
Cysteine and methionine metabolism	KEGG PATHWAY	gga00270	3	43	0.24146	0.448526	LDHA	MDH1	MDH2	http://www.genome.jp/kegg-bin/show_pathway?gga00270/gga:417517%09red/gga:396221%09red/gga:421281%09red
PPAR signaling pathway	KEGG PATHWAY	gga03320	4	64	0.243417	0.448526	SLC27A4	PPARD	ACSBG2	ACSL3	http://www.genome.jp/kegg-bin/show_pathway?gga03320/gga:424810%09red/gga:417220%09red/gga:420090%09red/gga:395479%09red
RNA polymerase	KEGG PATHWAY	gga03020	2	24	0.249761	0.448526	POLR2H	POLR2B	http://www.genome.jp/kegg-bin/show_pathway?gga03020/gga:422621%09red/gga:424954%09red
Valine, leucine and isoleucine degradation	KEGG PATHWAY	gga00280	3	44	0.25144	0.448526	PCCA	ACADS	ALDH9A1	http://www.genome.jp/kegg-bin/show_pathway?gga00280/gga:416969%09red/gga:424405%09red/gga:418774%09red
Cardiac muscle contraction	KEGG PATHWAY	gga04260	4	66	0.259677	0.448526	CACNB1	CACNG7	TPM3	ATP2A3	http://www.genome.jp/kegg-bin/show_pathway?gga04260/gga:107050634%09red/gga:770103%09red/gga:777366%09red/gga:395707%09red
p53 signaling pathway	KEGG PATHWAY	gga04115	4	66	0.259677	0.448526	BID	CD82	MDM4	TP53I3	http://www.genome.jp/kegg-bin/show_pathway?gga04115/gga:421977%09red/gga:423172%09red/gga:419823%09red/gga:395236%09red
Phosphonate and phosphinate metabolism	KEGG PATHWAY	gga00440	1	7	0.260297	0.448526	PCYT1A	http://www.genome.jp/kegg-bin/show_pathway?gga00440/gga:424915%09red
Sphingolipid metabolism	KEGG PATHWAY	gga00600	3	45	0.261479	0.450279	CERS2	SGPL1	SMPD1	http://www.genome.jp/kegg-bin/show_pathway?gga00600/gga:423714%09red/gga:100859441%09red/gga:419077%09red
Pentose phosphate pathway	KEGG PATHWAY	gga00030	2	25	0.263629	0.451187	PGLS	PGM2	http://www.genome.jp/kegg-bin/show_pathway?gga00030/gga:430442%09red/gga:426435%09red
Calcium signaling pathway	KEGG PATHWAY	gga04020	9	180	0.266496	0.451187	ERBB2	ATP2A3	MYLK3	ADRB1	GRIN2A	VDAC3	PPIF	EDNRB	ITPR1	http://www.genome.jp/kegg-bin/show_pathway?gga04020/gga:426793%09red/gga:408082%09red/gga:423723%09red/gga:395707%09red/gga:426130%09red/gga:415748%09red/gga:427678%09red/gga:101750705%09red/gga:395412%09red
Melanogenesis	KEGG PATHWAY	gga04916	5	91	0.282239	0.451187	CREB3L2	CTNNB1	TCF7	EDNRB	GNAI3	http://www.genome.jp/kegg-bin/show_pathway?gga04916/gga:418123%09red/gga:408082%09red/gga:395229%09red/gga:395964%09red/gga:374097%09red
Riboflavin metabolism	KEGG PATHWAY	gga00740	1	8	0.287661	0.451187	ACP5	http://www.genome.jp/kegg-bin/show_pathway?gga00740/gga:107057619%09red
Amino sugar and nucleotide sugar metabolism	KEGG PATHWAY	gga00520	3	48	0.291857	0.454111	GNPDA2	HK2	PGM2	http://www.genome.jp/kegg-bin/show_pathway?gga00520/gga:426435%09red/gga:374044%09red/gga:422772%09red
Vascular smooth muscle contraction	KEGG PATHWAY	gga04270	6	117	0.303709	0.458982	ARHGEF11	MRVI1	ITPR1	MYLK3	PLA2G2E	AGT	http://www.genome.jp/kegg-bin/show_pathway?gga04270/gga:421543%09red/gga:415748%09red/gga:426747%09red/gga:425979%09red/gga:395412%09red/gga:423037%09red
Glycerophospholipid metabolism	KEGG PATHWAY	gga00564	5	94	0.303886	0.458982	PCYT1A	PLA2G2E	GPAT2	TAZ	DGKE	http://www.genome.jp/kegg-bin/show_pathway?gga00564/gga:770911%09red/gga:426747%09red/gga:426550%09red/gga:424915%09red/gga:107049523%09red
Linoleic acid metabolism	KEGG PATHWAY	gga00591	2	28	0.305168	0.458982	PLA2G2E	CYP2J21	http://www.genome.jp/kegg-bin/show_pathway?gga00591/gga:426747%09red/gga:101750603%09red
Ubiquinone and other terpenoid-quinone biosynthesis	KEGG PATHWAY	gga00130	1	9	0.314014	0.458982	COQ5	http://www.genome.jp/kegg-bin/show_pathway?gga00130/gga:416975%09red
Apelin signaling pathway	KEGG PATHWAY	gga04371	6	119	0.316714	0.462453	PRKAG2	MRAS	MYLK3	MTOR	ITPR1	GNAI3	http://www.genome.jp/kegg-bin/show_pathway?gga04371/gga:395412%09red/gga:374097%09red/gga:415748%09red/gga:395149%09red/gga:420435%09red/gga:419455%09red
Ascorbate and aldarate metabolism	KEGG PATHWAY	gga00053	1	10	0.339393	0.468686	ALDH9A1	http://www.genome.jp/kegg-bin/show_pathway?gga00053/gga:424405%09red
Oocyte meiosis	KEGG PATHWAY	gga04114	5	99	0.34045	0.469908	MAD2L2	PTTG2	ITPR1	MAPK11	CUL1	http://www.genome.jp/kegg-bin/show_pathway?gga04114/gga:416158%09red/gga:395412%09red/gga:419493%09red/gga:417739%09red/gga:420783%09red
FoxO signaling pathway	KEGG PATHWAY	gga04068	6	123	0.342958	0.472412	SGK3	PIK3CA	PRKAG2	CHUK	MAPK11	NLK	http://www.genome.jp/kegg-bin/show_pathway?gga04068/gga:417669%09red/gga:423669%09red/gga:420167%09red/gga:417739%09red/gga:424971%09red/gga:420435%09red
Progesterone-mediated oocyte maturation	KEGG PATHWAY	gga04914	4	78	0.360158	0.483811	MAD2L2	PIK3CA	MAPK11	GNAI3	http://www.genome.jp/kegg-bin/show_pathway?gga04914/gga:424971%09red/gga:374097%09red/gga:417739%09red/gga:419493%09red
Starch and sucrose metabolism	KEGG PATHWAY	gga00500	2	33	0.373194	0.494088	HK2	PGM2	http://www.genome.jp/kegg-bin/show_pathway?gga00500/gga:426435%09red/gga:374044%09red
Cytokine-cytokine receptor interaction	KEGG PATHWAY	gga04060	9	202	0.379313	0.49693	IL18	IL1RL1	IL18RAP	IL2RG	IL18R1	IFNAR2	TNFRSF10B	IFNGR2	IL1R1	http://www.genome.jp/kegg-bin/show_pathway?gga04060/gga:395199%09red/gga:101750396%09red/gga:395312%09red/gga:418717%09red/gga:396481%09red/gga:374136%09red/gga:373904%09red/gga:418502%09red/gga:395664%09red
Drug metabolism - cytochrome P450	KEGG PATHWAY	gga00982	2	34	0.386498	0.49693	PRRC2C	FMO3	http://www.genome.jp/kegg-bin/show_pathway?gga00982/gga:424393%09red/gga:395267%09red
Alanine, aspartate and glutamate metabolism	KEGG PATHWAY	gga00250	2	34	0.386498	0.49693	ASL2	AGXT	http://www.genome.jp/kegg-bin/show_pathway?gga00250/gga:770344%09red/gga:417545%09red
Non-homologous end-joining	KEGG PATHWAY	gga03450	1	12	0.387372	0.49693	PRKDC	http://www.genome.jp/kegg-bin/show_pathway?gga03450/gga:395376%09red
VEGF signaling pathway	KEGG PATHWAY	gga04370	3	58	0.393571	0.504408	PIK3CA	VEGFA	MAPK11	http://www.genome.jp/kegg-bin/show_pathway?gga04370/gga:424971%09red/gga:395909%09red/gga:417739%09red
Spliceosome	KEGG PATHWAY	gga03040	5	107	0.399422	0.509699	EFTUD2	SMNDC1	PUF60	ZMAT2	TCERG1	http://www.genome.jp/kegg-bin/show_pathway?gga03040/gga:428281%09red/gga:427602%09red/gga:426402%09red/gga:416349%09red/gga:423889%09red
Fructose and mannose metabolism	KEGG PATHWAY	gga00051	2	35	0.399676	0.509699	HK2	TKFC	http://www.genome.jp/kegg-bin/show_pathway?gga00051/gga:426629%09red/gga:374044%09red
Galactose metabolism	KEGG PATHWAY	gga00052	2	35	0.399676	0.509699	HK2	PGM2	http://www.genome.jp/kegg-bin/show_pathway?gga00052/gga:426435%09red/gga:374044%09red
2-Oxocarboxylic acid metabolism	KEGG PATHWAY	gga01210	1	13	0.41004	0.509699	IDH3A	http://www.genome.jp/kegg-bin/show_pathway?gga01210/gga:415362%09red
Gap junction	KEGG PATHWAY	gga04540	4	84	0.410701	0.510055	ADRB1	ITPR1	GNAI3	PRKG2	http://www.genome.jp/kegg-bin/show_pathway?gga04540/gga:101750705%09red/gga:395412%09red/gga:428753%09red/gga:374097%09red
Biosynthesis of amino acids	KEGG PATHWAY	gga01230	3	60	0.413589	0.512241	IDH3A	ENO1	ASL2	http://www.genome.jp/kegg-bin/show_pathway?gga01230/gga:415362%09red/gga:417545%09red/gga:396017%09red
Glycine, serine and threonine metabolism	KEGG PATHWAY	gga00260	2	37	0.425621	0.521381	SARDH	AGXT	http://www.genome.jp/kegg-bin/show_pathway?gga00260/gga:770344%09red/gga:417146%09red
Glycosphingolipid biosynthesis - ganglio series	KEGG PATHWAY	gga00604	1	14	0.43187	0.521381	ST3GAL5	http://www.genome.jp/kegg-bin/show_pathway?gga00604/gga:407775%09red
Phenylalanine metabolism	KEGG PATHWAY	gga00360	1	14	0.43187	0.521381	DDC	http://www.genome.jp/kegg-bin/show_pathway?gga00360/gga:420947%09red
Oxidative phosphorylation	KEGG PATHWAY	gga00190	5	113	0.443334	0.533095	NDUFV3	NDUFS1	NDUFS2	PPA2	ATP6V0A2	http://www.genome.jp/kegg-bin/show_pathway?gga00190/gga:418541%09red/gga:422539%09red/gga:424102%09red/gga:395473%09red/gga:100857596%09red
Primary bile acid biosynthesis	KEGG PATHWAY	gga00120	1	15	0.452893	0.535845	BAAT	http://www.genome.jp/kegg-bin/show_pathway?gga00120/gga:769879%09red
One carbon pool by folate	KEGG PATHWAY	gga00670	1	17	0.492637	0.562365	GART	http://www.genome.jp/kegg-bin/show_pathway?gga00670/gga:395315%09red
Arginine biosynthesis	KEGG PATHWAY	gga00220	1	17	0.492637	0.562365	ASL2	http://www.genome.jp/kegg-bin/show_pathway?gga00220/gga:417545%09red
Other glycan degradation	KEGG PATHWAY	gga00511	1	17	0.492637	0.562365	MAN2B2	http://www.genome.jp/kegg-bin/show_pathway?gga00511/gga:422859%09red
RNA degradation	KEGG PATHWAY	gga03018	3	70	0.509768	0.574182	ENO1	PNPT1	DHX36	http://www.genome.jp/kegg-bin/show_pathway?gga03018/gga:421206%09red/gga:396017%09red/gga:425032%09red
Ether lipid metabolism	KEGG PATHWAY	gga00565	2	44	0.511411	0.574182	ENPP2	PLA2G2E	http://www.genome.jp/kegg-bin/show_pathway?gga00565/gga:426747%09red/gga:420361%09red
Glycosaminoglycan degradation	KEGG PATHWAY	gga00531	1	18	0.511414	0.574182	GUSB	http://www.genome.jp/kegg-bin/show_pathway?gga00531/gga:427823%09red
Pentose and glucuronate interconversions	KEGG PATHWAY	gga00040	1	20	0.54691	0.604573	GUSB	http://www.genome.jp/kegg-bin/show_pathway?gga00040/gga:427823%09red
Mismatch repair	KEGG PATHWAY	gga03430	1	20	0.54691	0.604573	RFC1	http://www.genome.jp/kegg-bin/show_pathway?gga03430/gga:422788%09red
Tight junction	KEGG PATHWAY	gga04530	6	156	0.556402	0.613938	ERBB2	MYH11	PRKAG2	ACTN4	MYH9	MAGI1	http://www.genome.jp/kegg-bin/show_pathway?gga04530/gga:396469%09red/gga:426130%09red/gga:396024%09red/gga:416083%09red/gga:420435%09red/gga:396211%09red
Glycosylphosphatidylinositol (GPI)-anchor biosynthesis	KEGG PATHWAY	gga00563	1	22	0.579831	0.629979	GPLD1	http://www.genome.jp/kegg-bin/show_pathway?gga00563/gga:420819%09red
ErbB signaling pathway	KEGG PATHWAY	gga04012	3	78	0.580377	0.630321	ERBB2	PIK3CA	MTOR	http://www.genome.jp/kegg-bin/show_pathway?gga04012/gga:426130%09red/gga:424971%09red/gga:419455%09red
Glycosphingolipid biosynthesis - lacto and neolacto series	KEGG PATHWAY	gga00601	1	23	0.595384	0.641762	GCNT2	http://www.genome.jp/kegg-bin/show_pathway?gga00601/gga:428479%09red
Butanoate metabolism	KEGG PATHWAY	gga00650	1	24	0.610362	0.654027	ACADS	http://www.genome.jp/kegg-bin/show_pathway?gga00650/gga:416969%09red
Glycosaminoglycan biosynthesis - heparan sulfate / heparin	KEGG PATHWAY	gga00534	1	24	0.610362	0.654027	EXT2	http://www.genome.jp/kegg-bin/show_pathway?gga00534/gga:425859%09red
alpha-Linolenic acid metabolism	KEGG PATHWAY	gga00592	1	25	0.624786	0.664261	PLA2G2E	http://www.genome.jp/kegg-bin/show_pathway?gga00592/gga:426747%09red
Autophagy - other	KEGG PATHWAY	gga04136	1	28	0.664935	0.695554	MTOR	http://www.genome.jp/kegg-bin/show_pathway?gga04136/gga:419455%09red
TGF-beta signaling pathway	KEGG PATHWAY	gga04350	3	90	0.673433	0.703702	CUL1	RBL1	RGMA	http://www.genome.jp/kegg-bin/show_pathway?gga04350/gga:420783%09red/gga:419126%09red/gga:395214%09red
SNARE interactions in vesicular transport	KEGG PATHWAY	gga04130	1	29	0.677341	0.706093	STX8	http://www.genome.jp/kegg-bin/show_pathway?gga04130/gga:417321%09red
Tyrosine metabolism	KEGG PATHWAY	gga00350	1	34	0.732817	0.754119	DDC	http://www.genome.jp/kegg-bin/show_pathway?gga00350/gga:420947%09red
mRNA surveillance pathway	KEGG PATHWAY	gga03015	2	70	0.750729	0.771096	DAZAP1	UPF3B	http://www.genome.jp/kegg-bin/show_pathway?gga03015/gga:427266%09red/gga:100858231%09red
Intestinal immune network for IgA production	KEGG PATHWAY	gga04672	1	36	0.752241	0.772067	BLB1	http://www.genome.jp/kegg-bin/show_pathway?gga04672/gga:693256%09red
Retinol metabolism	KEGG PATHWAY	gga00830	1	39	0.778764	0.795097	SDR16C5	http://www.genome.jp/kegg-bin/show_pathway?gga00830/gga:421130%09red
Hedgehog signaling pathway	KEGG PATHWAY	gga04340	1	41	0.79485	0.80789	CUL1	http://www.genome.jp/kegg-bin/show_pathway?gga04340/gga:420783%09red
Neuroactive ligand-receptor interaction	KEGG PATHWAY	gga04080	10	333	0.819216	0.829871	GPR156	ADRB1	GRIN2A	VIPR2	P2RY4	C3	GCGR	EDNRB	AGT	C5	http://www.genome.jp/kegg-bin/show_pathway?gga04080/gga:408082%09red/gga:421543%09red/gga:420453%09red/gga:100857687%09red/gga:418333%09red/gga:427678%09red/gga:101750705%09red/gga:425670%09red/gga:417122%09red/gga:396370%09red
GnRH signaling pathway	KEGG PATHWAY	gga04912	2	84	0.832111	0.840124	ITPR1	MAPK11	http://www.genome.jp/kegg-bin/show_pathway?gga04912/gga:395412%09red/gga:417739%09red
Glutathione metabolism	KEGG PATHWAY	gga00480	1	47	0.836432	0.843862	TXNDC12	http://www.genome.jp/kegg-bin/show_pathway?gga00480/gga:772208%09red
--------------------
--------------------
#Term	Database	ID	Input number	Background number	P-Value	Corrected P-Value	Input	Hyperlink
cytosol	Gene Ontology	GO:0005829	174	2089	3.63645e-21	9.91297e-18	TGM2	IL1RL1	CKB	NELFA	FAM160A2	P4HA2	CDC37	VPS37A	USP20	EFTUD2	AKAP10	COMMD9	FMNL2	FLII	CAPN1	EVI5	CREBRF	RELA	NABP2	DUS2	ERBB2	WDR6	RAB5A	STX8	ARL14EP	ZNF687	PASK	ANXA11	ACOT7	CNDP2	URI1	DNAJA2	INPP5B	AKAP7	HK2	NPEPPS	EIF4G1	EFL1	PPIP5K1	ACLY	STK38L	RNF213	PPA2
nucleoplasm	Gene Ontology	GO:0005654	138	1526	1.58875e-19	2.16546e-16	SMARCC2	SMARCC1	GLRX2	GOLGA4	P4HA2	PUF60	HSF2	SRSF11	VPS37A	COMMD9	RPF2	FLII	CNDP2	MAGI1	CREBRF	RELA	SLC26A11	NABP2	SOD1	ARL14EP	TCERG1	ZNF687	ANXA11	ACOT7	MDM4	THOC5	URI1	NIN	MAF1	SPEN	UTRN	KPNA3	NUCKS1	CTBP1	CLUAP1	UBP1	ACADS	NFU1	FUBP1	KHDRBS1	NMRK2	COPS5	GTF3C1
nucleus	Gene Ontology	GO:0005634	179	2478	6.81888e-16	6.19609e-13	HSF2	WWP2	TBX21	PRKAG2	PKP4	REXO5	NAIF1	CCNT1	TARSL2	USP20	FHL5	OTUD7B	CERS2	APBB1	FLII	PTBP1	ERBB2	CENPN	DIAPH3	WRN	RFC1	SP3	ZNF687	PASK	MTUS1	MDM4	GPATCH1	DDX49	FUBP3	MAF1	PTPN11	MBTD1	SPEN	KPNA3	CCDC82	EIF4G1	KIF11	UFL1	EPAS1	RASSF1	NAA30	FUBP1	RASSF5
ATP binding	Gene Ontology	GO:0005524	101	1073	1.97803e-15	1.34803e-12	CKB	PRKAG2	PRPF4B	TARSL2	BCS1L	GRK6	PIK3CA	PARS2	ABCD2	RNASEL	ERBB2	DNAJA2	PCCA	ENTPD2	WRN	SCYL3	KIFC3	DDX49	UCKL1	EIF4G1	NME3	PPIP5K1	ACLY	STK38L	RNF213	KIF11	ATP2A3	NUBPL	MYO18B	ACSBG2	XRCC3	SHPRH	DHX36	DHX37	NEK6	DDX59	CHD7	DDX52	PRKG2	SMARCAD1	NLK	TOP2B	ALPK1
cytoplasm	Gene Ontology	GO:0005737	147	2299	1.90436e-09	1.03826e-06	SMARCC1	WWP2	GNPDA2	NPEPL1	PRKAG2	PKP4	AGK	TARSL2	TRMT12	OTUD7B	PIK3CA	CCDC88C	APBB1	INTS3	FLII	MAGI1	RELA	ARHGAP28	DUS2	BRCA1	ARHGEF11	DIAPH3	WRN	RSPRY1	PASK	MTUS1	ISYNA1	NLK	THOC5	PCYT1A	PPP1R9B	KCTD17	FUBP3	MAF1	PTPN11	EIF2A	UTRN	KPNA3	NUCKS1	ARPC1A	ICK	ASL2	STMN1
nucleolus	Gene Ontology	GO:0005730	46	446	9.45352e-09	4.29505e-06	MAD2L2	KATNBL1	MAF1	ERGIC2	PRKDC	DIEXF	GTF3C1	REXO5	NOP14	FANCD2	DHX37	CHD7	UPF3B	RPF2	WRN	MAGI1	ABCB8	N4BP1	UTP23	NIFK	MCM10	ARL14EP	RSL24D1	PARP1	PARP3	MTUS1	NOL9	ITPR1	NPM1	NAT10	MIDN	NIN	ARID5A	DDX24	RPL36	IER5	ADARB1	METTL22	RPP14	RNF213	NUCKS1	RRP12	KRR1
plasma membrane	Gene Ontology	GO:0005886	106	1580	5.18469e-08	2.01907e-05	SYTL2	REM1	NIPA1	IFNAR2	PKP4	MRC1	PIK3CA	APBB1	BF2	BF1	SLC34A2	MAGI1	SLC6A9	BRCA1	WDR6	RAB5A	ENTPD2	SIRPA	SOD1	ARL14EP	KCNN1	SNAP91	NIN	TNFRSF10B	ACSL3	PPIP5K1	SPPL2A	ACLY	SNX4	NMRK2	NUBPL	NOX4	IFNGR2	PREX2	SLC9A9	NAIF1	RAPH1	FAM129A	TMEM127	MRAS	HDAC11	ITPR1	ING2
endoplasmic reticulum	Gene Ontology	GO:0005783	47	524	3.06538e-07	0.000104453	ITGA8	TGM2	RPLP0	ERGIC2	ZDHHC18	HSP90B1	P4HA2	GOLT1A	ALOX5AP	ATP11C	ACSBG2	PANX1	CAMLG	FLT3	APH1A	CERS2	PLOD2	APBB1	SULF1	GRIN2A	SLC26A11	UGGT1	UFL1	PDIA6	ATP8A1	ATP10D	SGPL1	CCDC3	PLA2G2E	SAR1B	ICMT	PCYT1A	STAU1	SRP72	KCTD17	B3GALNT2	ACSL3	TRAPPC5	TXNDC12	CREB3L2	SSR1	P4HA1	MGAT4A
mitochondrion	Gene Ontology	GO:0005739	51	617	9.44586e-07	0.000286105	TGM2	ACADS	AGK	ACSBG2	NFU1	PARS2	MTERF3	PNPT1	PCCA	NUBPL	NDUFAF4	P4HA1	NOX4	SCO1	TSPOAP1	FDXR	XRCC3	IDE	IDH3A	AKAP10	BID	OXSM	NAIF1	MTG1	HK2	CAPN1	PITRM1	TMEM71	CASP8AP2	MRPL37	MINOS1	LIAS	SOD1	MRPL18	AMBRA1	PARP1	MRPL39	GLRX2	MECR	GART	PPIF	DLST	SUCLA2
magnesium ion binding	Gene Ontology	GO:0000287	21	154	2.2031e-06	0.000545969	NEK6	MYH11	IDH3A	ICK	NLK	WRN	SUCLA2	ATP8A1	ATP10D	NUDT5	PGM2	NT5C3B	ENO1	LATS1	ATP11C	PPA2	ILVBL	ADPRH	DUT	STK38L	DHX36	http://amigo.geneontology.org/amigo/term/GO:0000287
unfolded protein binding	Gene Ontology	GO:0051082	13	66	6.12419e-06	0.00127075	DNAJA2	CLPX	GRPEL2	NUDCD3	DNAJB6	HSP90B1	CDC37	CLGN	PDRG1	TOMM20	HSPE1	NPM1	UGGT1	http://amigo.geneontology.org/amigo/term/GO:0051082
chromatin binding	Gene Ontology	GO:0003682	30	300	6.17691e-06	0.00127075	SMARCC2	SMARCC1	HESX1	NELFA	CTNNB1	ING5	CCNT1	ASXL2	NAP1L4	APBB1	MED12	PHC1	PRIMPOL	SMARCAD1	RELA	TOP2B	HHEX	SP3	SFPQ	POLR2B	ATRX	NPM1	PKNOX1	ING2	URI1	MBTD1	NUCKS1	CDC45	CTBP1	ATF2	http://amigo.geneontology.org/amigo/term/GO:0003682
centrosome	Gene Ontology	GO:0005813	32	333	6.52625e-06	0.00127075	CLUAP1	ACADS	ZBED1	PCM1	CTNNB1	NDC80	DYNC1I2	USP20	STIL	ZFYVE19	GNAI3	IFT80	NPM1	CCDC88C	VPS37A	CDKL2	CLIP1	MAPRE1	RRAGD	IFT57	WRN	CENPF	BCCIP	DYNC1LI2	MZT1	KIFC3	CEP350	RAB11FIP3	NIN	CDC45	CNTRL	TUBGCP5	http://amigo.geneontology.org/amigo/term/GO:0005813
membrane	Gene Ontology	GO:0016020	38	438	8.3603e-06	0.00151934	RECK	AGK	NIPA1	KHDRBS1	CTNNB1	RC3H2	DLK1	PLCH1	ACSBG2	ELMO2	ENTPD2	LRSAM1	SRPRA	PIK3CA	CCPG1	TM9SF3	PNPLA8	LAMA1	TMEM127	FAM49A	SLC44A5	PGRMC1	MTMR10	ARL6IP5	PLPP7	SLC39A3	TMEM87A	NIPAL1	INPP5B	MTMR4	EXOC6	ACSL3	FLOT1	FLOT2	VEGFA	ABCC1	NBEAL2	MDH2	http://amigo.geneontology.org/amigo/term/GO:0016020
integral component of membrane	Gene Ontology	GO:0016021	142	2565	1.03213e-05	0.00175849	LAPTM5	IL1RL1	NIPA1	ZDHHC18	IFNAR2	GLG1	JPH1	SLC25A14	SLC25A10	MRC1	CERS2	SLC17A9	BF2	BF1	SLC34A2	ABCD2	NUP210	GINM1	MAPRE2	FMO3	CTNNAL1	ENTPD2	SIRPA	TMEM222	KCNN1	CNNM4	INPP5B	TNFRSF10B	WBP1L	PTPN11	ORMDL1	TRAPPC5	NRXN1	ADAM9	ACSL3	STARD3	NETO2	YME1L1	MFSD11	GOLT1A	SLC25A30	IFNGR2	GPR137B
protein C-terminus binding	Gene Ontology	GO:0008022	16	106	1.13015e-05	0.00181224	ERBB2	LAMA1	OPTN	PEX6	HESX1	CENPF	VPS36	MED12	CTNNB1	PRRC2C	PHB2	PDZD3	KPNA3	TOP2B	HSPG2	FOXN3	http://amigo.geneontology.org/amigo/term/GO:0008022
RNA binding	Gene Ontology	GO:0003723	33	365	1.50412e-05	0.00227791	RBM6	RPS16	KHDRBS1	HSP90B1	PUF60	REXO5	RNASET2	DHX36	DHX37	KRR1	DDX59	SRSF11	NUFIP2	RBM14	RBM39	RNASEL	BRCA1	NIFK	ESF1	SMNDC1	MRPS5	SFPQ	SFSWAP	NPM1	HNRNPUL1	GPATCH1	STAU1	SUGP2	SPEN	TARBP1	RSL24D1	NHP2	TRMT2A	http://amigo.geneontology.org/amigo/term/GO:0003723
ribonucleoprotein complex	Gene Ontology	GO:1990904	13	75	2.05091e-05	0.00294251	BRCA1	DAZAP1	MYEF2	ACTN4	NPM1	NUP98	EFL1	EFTUD2	GTF3C1	EEF2	TOP2B	ILF3	ILF2	http://amigo.geneontology.org/amigo/term/GO:1990904
metal ion binding	Gene Ontology	GO:0046872	51	714	3.99689e-05	0.00525342	ITGA8	TGM2	MAN2B2	LPXN	ATP2A3	PCCA	RC3H2	ING5	COL3A1	SHPRH	NT5DC4	ZFYVE19	OPTN	ZBTB17	NGLY1	ASXL2	GNAI3	BF2	FHL5	TNS2	ZNF767	LFNG	PDCD2	PDE5A	MTMR4	FGD6	ANTXR2	LIAS	PGRMC1	KMT2D	RSPRY1	RSF1	SP3	CYBA	ATRX	GART	MDM4	ING2	ING3	DNAJA2	UBXN7	THAP5	TOP2B
DNA binding	Gene Ontology	GO:0003677	34	403	4.142e-05	0.00525342	IFIH1	MSL3	RFC1	WRNIP1	RC3H2	CCNT1	SHPRH	SMARCA5	CERS2	CHD7	TIPIN	ASXL2	DNAJB6	H3F3B	SMARCAD1	RELA	NABP2	BRCA1	HMGA1	ZBED4	ZNF687	PARP1	CHTF18	POLR2B	PRKDC	ING2	TAF6	THAP5	TOP2B	PARPBP	POGZ	ILF2	ILF3	ATF2	http://amigo.geneontology.org/amigo/term/GO:0003677
intracellular membrane-bounded organelle	Gene Ontology	GO:0043231	24	237	4.23974e-05	0.00525342	AGK	EHD2	SPTAN1	DOLPP1	RC3H2	HIP1	CYP2U1	NLRC3	CYP2J21	VPS37C	VPS37A	PLCH1	CCZ1	GPLD1	TRAF7	ARL14EP	AMBRA1	DENND1B	CNNM4	INPP5F	NKTR	ABCA2	PPIG	PPIF	http://amigo.geneontology.org/amigo/term/GO:0043231
histone binding	Gene Ontology	GO:0042393	14	98	6.73691e-05	0.00765201	SMARCC2	NASP	SMARCC1	KMT2D	MBTD1	NAP1L4	APBB1	RSF1	PHC1	MCM2	USP16	UBXN7	NPM1	SMARCA5	http://amigo.geneontology.org/amigo/term/GO:0042393
negative regulation of cell population proliferation	Gene Ontology	GO:0008285	20	184	7.46338e-05	0.00813807	CTNNB1	TMEM127	ZBTB17	INPPL1	IRF1	AMBRA1	RASSF5	KLF11	RB1	HMGA1	NOX4	DLL1	GPLD1	SH2B3	TNS2	ING5	ADARB1	NPM1	ING2	SCIN	http://amigo.geneontology.org/amigo/term/GO:0008285
T cell differentiation	Gene Ontology	GO:0030217	7	23	8.92849e-05	0.00935764	PTPN22	CHD7	TBX21	SP3	DLL4	LFNG	PKNOX1	http://amigo.geneontology.org/amigo/term/GO:0030217
positive regulation of transcription by RNA polymerase II	Gene Ontology	GO:0045944	53	779	9.26839e-05	0.00935764	SMARCC1	WWP2	TBX21	COPS5	CTNNB1	TBX3	HSF2	RB1	CCNT1	MGA	PAXBP1	SMARCA5	FHL5	KLF11	ZBTB17	TBK1	ASPM	ASXL2	CSRNP2	MED12	CCPG1	RBM14	CREBRF	MED19	RELA	RNASEL	HNF4beta	BRCA1	ZBED1	TCF7	KMT2D	MLXIPL	SP3	CHUK	SENP1	PARP1	DLL1	PPARD	USP16	PRKDC	NPM1	PKNOX1	IL18
positive regulation of transcription, DNA-templated	Gene Ontology	GO:0045893	22	222	0.000116133	0.0113064	SMARCC2	MAD2L2	SMARCC1	NFYB	MAPK11	AGT	MMS19	APBB1	NR2F2	MED16	ARHGEF11	RSF1	HMGA1	ING5	TRIM45	ING2	WBP2NL	TBX3	EDRF1	ZNF711	ILF3	ILF2	http://amigo.geneontology.org/amigo/term/GO:0045893
mRNA binding	Gene Ontology	GO:0003729	17	148	0.000138419	0.0126156	CLUH	HDLBP	MYEF2	NUP98	EIF4G3	FUBP3	EIF4G1	FUBP1	KHDRBS1	UPF3B	RC3H2	LSM14A	RBM14	PTBP1	LUC7L	SLC4A1AP	THOC5	http://amigo.geneontology.org/amigo/term/GO:0003729
nuclear body	Gene Ontology	GO:0016604	19	178	0.000138836	0.0126156	BRCA1	TCF7	NELFA	CLIC3	ACTN4	SUGP2	YME1L1	PARP1	PARP3	RAPH1	DCAF7	STK35	FANCD2	CREBRF	NUP98	UBXN7	KLHDC2	NUFIP2	KLF11	http://amigo.geneontology.org/amigo/term/GO:0016604
double-stranded RNA binding	Gene Ontology	GO:0003725	9	47	0.000197656	0.0163276	IFIH1	LSM14A	DUS2	ADARB1	RC3H2	DHX36	DDX60	ILF3	ILF2	http://amigo.geneontology.org/amigo/term/GO:0003725
regulation of microtubule polymerization or depolymerization	Gene Ontology	GO:0031110	5	11	0.0002126	0.0168886	MAPRE1	STMN1	CLASP2	CLASP1	MAPRE2	http://amigo.geneontology.org/amigo/term/GO:0031110
positive regulation of translation	Gene Ontology	GO:0045727	8	37	0.000216838	0.0168886	ERBB2	PLXNB2	UPF3B	MTOR	FAM129A	ZCCHC4	EEF2	NAT10	http://amigo.geneontology.org/amigo/term/GO:0045727
nuclear envelope	Gene Ontology	GO:0005635	12	85	0.000241879	0.0183156	PLPP7	GOLT1A	RTN4	CENPF	PARP1	CLIP1	SUN2	CLGN	ALOX5AP	MTOR	ANXA11	TNKS2	http://amigo.geneontology.org/amigo/term/GO:0005635
fatty acid metabolic process	Gene Ontology	GO:0006631	7	28	0.000251053	0.0184965	SGPL1	BAAT	GPAT2	PPARD	MECR	ACOT7	PNPLA8	http://amigo.geneontology.org/amigo/term/GO:0006631
protein folding	Gene Ontology	GO:0006457	11	74	0.0002924	0.0209759	CLPX	GRPEL2	NUDCD3	DNAJB6	HSP90B1	CDC37	CLGN	PDRG1	PPIG	PPIF	NKTR	http://amigo.geneontology.org/amigo/term/GO:0006457
single-stranded DNA binding	Gene Ontology	GO:0003697	11	75	0.000324261	0.022665	MCM10	MYEF2	FUBP3	ERCC5	FASN	MCM2	NEIL3	NUCKS1	CDC45	POLR2H	DHX36	http://amigo.geneontology.org/amigo/term/GO:0003697
protein phosphorylation	Gene Ontology	GO:0006468	21	226	0.000366261	0.0249607	ALPK1	LAMA1	SCYL3	RPS6KL1	GRK6	CDK10	PRKAG2	CHUK	EIF2A	ADCK1	PRKDC	STK35	MYLK3	PRKG2	CCNT1	MMD	CDKL2	PASK	RNASEL	ILF3	CDK5	http://amigo.geneontology.org/amigo/term/GO:0006468
flotillin complex	Gene Ontology	GO:0016600	4	7	0.000497908	0.0323166	CTNNB1	CORO1C	FLOT1	FLOT2	http://amigo.geneontology.org/amigo/term/GO:0016600
brush border	Gene Ontology	GO:0005903	7	33	0.000592792	0.0375803	ACTN4	MYH9	SLC34A2	FLII	PDZD3	SCIN	PDZK1	http://amigo.geneontology.org/amigo/term/GO:0005903
double-stranded DNA binding	Gene Ontology	GO:0003690	7	34	0.000692289	0.0428904	MCM10	MTERF3	LSM14A	NUCKS1	PRKDC	NEIL3	DDX60	http://amigo.geneontology.org/amigo/term/GO:0003690
protein-containing complex	Gene Ontology	GO:0032991	21	240	0.000754392	0.0450986	NEK6	UFL1	DAZAP2	AKAP7	CNNM4	ERLIN2	SOD1	PHB2	PTPN11	MYH9	KHDRBS1	NASP	METTL22	KIF11	AKAP10	COQ5	NAE1	UBXN6	UGGT1	RBM39	C3	http://amigo.geneontology.org/amigo/term/GO:0032991
ubiquitin protein ligase binding	Gene Ontology	GO:0031625	18	190	0.000761019	0.0450986	NEK6	STX8	UBXN7	RTN4	ERLIN2	BAG4	BRCA1	AMBRA1	APBB1	RB1	PSMA3	MAP1LC3A	NAE1	NLK	CAMLG	SHPRH	CUL1	RELA	http://amigo.geneontology.org/amigo/term/GO:0031625
RNA polymerase II activating transcription factor binding	Gene Ontology	GO:0001102	8	46	0.000780967	0.0452961	MAD2L2	MGA	RBL1	TBX21	RB1	CTNNB1	TBX3	ATF2	http://amigo.geneontology.org/amigo/term/GO:0001102
identical protein binding	Gene Ontology	GO:0042802	44	678	0.000887489	0.050402	BRCA1	IFIH1	HSF2	EHD2	GNPDA2	CASP8AP2	KHDRBS1	SCYL3	WRNIP1	PUF60	P4HA1	GGPS1	LUC7L	HTRA3	STIL	OPTN	TBK1	SUN2	NDC80	CCDC88C	RB1	GP1BB	MAPRE1	LDHA	MAPRE2	ERBB2	ZBED1	PHYKPL	MCM10	SOD1	TCERG1	PARP1	MTOR	GART	VWF	DAZAP2	KCTD17	TOPBP1	IER5	EIF4G1	SDC4	ALCAM	CTBP1
RNA processing	Gene Ontology	GO:0006396	6	26	0.000999963	0.0543466	ADARB1	TRMT2A	NOL9	SUGP2	RNASEL	HNRNPUL1	http://amigo.geneontology.org/amigo/term/GO:0006396
magnesium ion transport	Gene Ontology	GO:0015693	4	9	0.00101676	0.0543466	MRS2	NIPAL1	NIPA1	CNNM4	http://amigo.geneontology.org/amigo/term/GO:0015693
carboxy-lyase activity	Gene Ontology	GO:0016831	4	9	0.00101676	0.0543466	DDC	SGPL1	ACMSD	CSAD	http://amigo.geneontology.org/amigo/term/GO:0016831
iron-sulfur cluster assembly	Gene Ontology	GO:0016226	5	17	0.0010658	0.0548181	CIAO1	MMS19	NDOR1	NUBPL	NFU1	http://amigo.geneontology.org/amigo/term/GO:0016226
focal adhesion	Gene Ontology	GO:0005925	13	118	0.00115818	0.0584667	KLF11	ITGB5	LPXN	CLASP1	ARL14EP	MYH9	IL1RL1	SENP1	PARVB	TNS2	TNS1	MAPRE1	MAPRE2	http://amigo.geneontology.org/amigo/term/GO:0005925
response to ionizing radiation	Gene Ontology	GO:0010212	6	27	0.00118438	0.0587021	BRCA1	INTS3	TOPBP1	PAXIP1	UBXN7	NABP2	http://amigo.geneontology.org/amigo/term/GO:0010212
apoptotic mitochondrial changes	Gene Ontology	GO:0008637	4	10	0.001382	0.0655053	HK2	NDUFS1	BID	PPIF	http://amigo.geneontology.org/amigo/term/GO:0008637
nucleosome assembly	Gene Ontology	GO:0006334	6	28	0.00139373	0.0655053	NAP1L4	RSF1	MCM2	CHAF1B	SHPRH	SMARCA5	http://amigo.geneontology.org/amigo/term/GO:0006334
Rab GTPase binding	Gene Ontology	GO:0017137	11	92	0.00150004	0.0693067	RAB11FIP3	TBC1D9	TMEM127	OPTN	WDR44	SYTL2	TNFAIP1	UNC13D	EVI5	DENND1B	ARHGAP1	http://amigo.geneontology.org/amigo/term/GO:0017137
transforming growth factor beta receptor signaling pathway	Gene Ontology	GO:0007179	8	52	0.00158109	0.0713554	ITGB5	LPXN	GCNT2	ADAM9	APPL1	NLK	MTMR4	FUT8	http://amigo.geneontology.org/amigo/term/GO:0007179
phosphatidylinositol binding	Gene Ontology	GO:0035091	9	65	0.00159673	0.0713554	SGK3	SNX4	MCF2L	PASK	APPL1	ITPR1	HIP1	ING2	PITPNB	http://amigo.geneontology.org/amigo/term/GO:0035091
transcription factor binding	Gene Ontology	GO:0008134	15	155	0.00167097	0.073469	EPAS1	HMGA1	UBXN7	CENPF	MLXIPL	ASCL3	PARP1	APBB1	NUCKS1	CCNT1	MED19	NLK	PRKDC	PAXBP1	DACT2	http://amigo.geneontology.org/amigo/term/GO:0008134
centriolar satellite	Gene Ontology	GO:0034451	9	66	0.0017561	0.0747987	NEK6	RAB11FIP3	CCDC66	PCM1	UPF3B	FLII	KRT18	RBM39	NLRC3	http://amigo.geneontology.org/amigo/term/GO:0034451
monocyte differentiation	Gene Ontology	GO:0030224	4	11	0.00182973	0.0755734	MYH9	SP3	FASN	THOC5	http://amigo.geneontology.org/amigo/term/GO:0030224
protein catabolic process	Gene Ontology	GO:0030163	4	11	0.00182973	0.0755734	PSMC1	DIEXF	LRSAM1	CLPX	http://amigo.geneontology.org/amigo/term/GO:0030163
response to virus	Gene Ontology	GO:0009615	6	30	0.00189582	0.0771342	IFIH1	TBX21	RPS15A	HNRNPUL1	DHX36	URI1	http://amigo.geneontology.org/amigo/term/GO:0009615
chaperone binding	Gene Ontology	GO:0051087	9	67	0.00192794	0.0772877	DNAJA2	GRPEL2	BAG4	SOD1	DNAJB6	CDC37	TBX3	HSPE1	VWF	http://amigo.geneontology.org/amigo/term/GO:0051087
negative regulation of proteasomal ubiquitin-dependent protein catabolic process	Gene Ontology	GO:0032435	5	20	0.00196161	0.077498	OGT	N4BP1	SMARCC1	CAMLG	SENP1	http://amigo.geneontology.org/amigo/term/GO:0032435
zinc ion binding	Gene Ontology	GO:0008270	35	527	0.00200573	0.0775529	IFIH1	ZMAT2	SMPD1	TCEA3	LTA4H	IDE	USP20	HNF4beta	ZC3HC1	SOD1	NR2F2	CLIP1	PHC1	PRIMPOL	PITRM1	NPEPPS	ZCCHC4	BRCA1	TRAF7	ENPP2	LACTB2	PARP1	PPARD	USP16	TRIP12	TRIM63	ACMSD	FSD1	VAT1	MBTD1	UTRN	NEIL3	ZNF407	GATAD2B	TRIM3	http://amigo.geneontology.org/amigo/term/GO:0008270
negative regulation of transcription, DNA-templated	Gene Ontology	GO:0045892	18	209	0.00204457	0.0775529	BRCA1	ZNF639	HHEX	PHB2	MTERF3	MBTD1	KHDRBS1	DNAJB6	RSF1	HMGA1	TBX3	PHC1	RB1	CENPF	TCF7	FOXN3	ILF3	ATOH8	http://amigo.geneontology.org/amigo/term/GO:0045892
single-stranded RNA binding	Gene Ontology	GO:0003727	6	31	0.00219298	0.0818915	LACTB2	LSM14A	IFIH1	NPTXR	DDX60	ILF3	http://amigo.geneontology.org/amigo/term/GO:0003727
cell division	Gene Ontology	GO:0051301	10	83	0.00230137	0.083409	MAD2L2	CLASP1	TIPIN	MAPRE1	RB1	USP16	CDCA9	NDC80	GNAI3	MAPRE2	http://amigo.geneontology.org/amigo/term/GO:0051301
nucleic acid binding	Gene Ontology	GO:0003676	14	145	0.0023952	0.083409	DDX49	TBK1	DDX24	DDX52	ENPP2	METTL4	TCEA3	SPEN	SFPQ	ZMAT2	GPATCH8	ZNF407	ZNF767	ZCCHC4	http://amigo.geneontology.org/amigo/term/GO:0003676
succinate transmembrane transporter activity	Gene Ontology	GO:0015141	3	5	0.0024554	0.083409	SLC25A14	SLC25A30	SLC25A10	http://amigo.geneontology.org/amigo/term/GO:0015141
cellular sphingolipid homeostasis	Gene Ontology	GO:0090156	3	5	0.0024554	0.083409	RTN4	ABCA2	ORMDL1	http://amigo.geneontology.org/amigo/term/GO:0090156
positive regulation of xenophagy	Gene Ontology	GO:1904417	3	5	0.0024554	0.083409	OPTN	LRSAM1	TBK1	http://amigo.geneontology.org/amigo/term/GO:1904417
interleukin-18-mediated signaling pathway	Gene Ontology	GO:0035655	3	5	0.0024554	0.083409	IL18	IL18R1	IL18RAP	http://amigo.geneontology.org/amigo/term/GO:0035655
succinate transmembrane transport	Gene Ontology	GO:0071422	3	5	0.0024554	0.083409	SLC25A14	SLC25A30	SLC25A10	http://amigo.geneontology.org/amigo/term/GO:0071422
microtubule binding	Gene Ontology	GO:0008017	15	162	0.0024784	0.083409	FSD1	CCDC66	CLASP2	CLASP1	CENPF	CCDC88C	MTUS1	CLIP1	CEP350	KIF11	MAP1LC3A	MAPRE1	KIFC3	CCDC181	MAPRE2	http://amigo.geneontology.org/amigo/term/GO:0008017
ciliary basal body	Gene Ontology	GO:0036064	11	99	0.00254158	0.084492	ICK	CCDC66	DLG5	IFT57	IFT80	PCM1	CENPF	CDK10	ARMC9	TTLL9	CFAP70	http://amigo.geneontology.org/amigo/term/GO:0036064
spindle	Gene Ontology	GO:0005819	7	44	0.00259031	0.0850746	MAD2L2	MZT1	MYH9	RB1	ANXA11	CLTCL1	MAPRE1	http://amigo.geneontology.org/amigo/term/GO:0005819
actin filament binding	Gene Ontology	GO:0051015	15	164	0.00276086	0.0891214	MYH11	CTNNAL1	ACTN4	FMNL2	ARPC1A	MYH9	MPRIP	CORO1C	FLII	CORO7	PANX1	SVIL	PPP1R9B	HIP1	SCIN	http://amigo.geneontology.org/amigo/term/GO:0051015
negative regulation of protein ubiquitination	Gene Ontology	GO:0031397	6	33	0.00289103	0.0891214	UFL1	HSF2	OGT	PRR7	CAMLG	N4BP1	http://amigo.geneontology.org/amigo/term/GO:0031397
mitochondrial large ribosomal subunit	Gene Ontology	GO:0005762	7	45	0.00289949	0.0891214	MRPL10	MRPL37	MRPL21	MRPL18	MRPL28	MRPL39	MRPL40	http://amigo.geneontology.org/amigo/term/GO:0005762
perinuclear region of cytoplasm	Gene Ontology	GO:0048471	23	307	0.00290069	0.0891214	RASGRP3	EHD2	CHGA	HSP90B1	WRNIP1	CTNNB1	PKP4	NOX4	XRCC3	ARHGAP1	NLRC3	OPTN	CDKN3	DNAJB6	PRR7	TNKS2	COPS5	STX8	NDOR1	ACTN4	ACSL3	FBXL5	ATP6V0A2	http://amigo.geneontology.org/amigo/term/GO:0048471
negative regulation of transcription by RNA polymerase II	Gene Ontology	GO:0000122	34	520	0.00291011	0.0891214	SMARCC2	MAD2L2	WWP2	TBX21	TCERG1	CTNNB1	TBX3	PAXBP1	KLF11	OTUD7B	APBB1	RB1	NR2F2	HESX1	ASCL3	RELA	TCF7	HHEX	RBL1	MLXIPL	KHDRBS1	SP3	SFPQ	DLL4	MDM4	URI1	MGA	ARID5A	PPARD	SPEN	CTR9	NPTXR	GATAD2B	CTBP1	http://amigo.geneontology.org/amigo/term/GO:0000122
WW domain binding	Gene Ontology	GO:0050699	4	13	0.00300777	0.0891214	WBP2NL	DAZAP2	WBP1	SCNN1A	http://amigo.geneontology.org/amigo/term/GO:0050699
positive regulation of TORC1 signaling	Gene Ontology	GO:1904263	4	13	0.00300777	0.0891214	RRAGD	SEC13	LAMTOR5	GPR137B	http://amigo.geneontology.org/amigo/term/GO:1904263
activation of innate immune response	Gene Ontology	GO:0002218	4	13	0.00300777	0.0891214	SFPQ	PRKDC	TBK1	RBM14	http://amigo.geneontology.org/amigo/term/GO:0002218
magnesium ion transmembrane transporter activity	Gene Ontology	GO:0015095	4	13	0.00300777	0.0891214	MRS2	NIPAL1	NIPA1	CNNM4	http://amigo.geneontology.org/amigo/term/GO:0015095
ribonucleoprotein complex binding	Gene Ontology	GO:0043021	5	23	0.00331114	0.0956673	EZH2	IFIH1	SRP54	BOP1	RNASEL	http://amigo.geneontology.org/amigo/term/GO:0043021
interstrand cross-link repair	Gene Ontology	GO:0036297	5	23	0.00331114	0.0956673	XRCC3	FANCB	FANCA	FANCD2	NUCKS1	http://amigo.geneontology.org/amigo/term/GO:0036297
endoplasmic reticulum membrane	Gene Ontology	GO:0005789	20	257	0.00355588	0.0956673	UFL1	FMO3	HERPUD1	ERLIN2	SRPRA	PCYT1A	ARL6IP5	SLC27A4	RHBDF2	HSP90B1	GNAI3	SSR1	CLGN	JPH1	STARD3	RFT1	ITPR1	STARD3NL	SEC61A2	ICMT	http://amigo.geneontology.org/amigo/term/GO:0005789
Wnt signalosome	Gene Ontology	GO:1990909	3	6	0.00358223	0.0956673	CTNNB1	RECK	LRP6	http://amigo.geneontology.org/amigo/term/GO:1990909
positive regulation of keratinocyte migration	Gene Ontology	GO:0051549	3	6	0.00358223	0.0956673	ADAM9	MTOR	MAPRE2	http://amigo.geneontology.org/amigo/term/GO:0051549
protein maturation by iron-sulfur cluster transfer	Gene Ontology	GO:0097428	3	6	0.00358223	0.0956673	CIAO1	MMS19	NFU1	http://amigo.geneontology.org/amigo/term/GO:0097428
sulfate transport	Gene Ontology	GO:0008272	3	6	0.00358223	0.0956673	SLC25A14	SLC25A30	SLC25A10	http://amigo.geneontology.org/amigo/term/GO:0008272
interleukin-1 receptor activity	Gene Ontology	GO:0004908	3	6	0.00358223	0.0956673	IL18R1	IL18RAP	IL1RL1	http://amigo.geneontology.org/amigo/term/GO:0004908
protein poly-ADP-ribosylation	Gene Ontology	GO:0070212	3	6	0.00358223	0.0956673	TNKS2	PARP1	PARP3	http://amigo.geneontology.org/amigo/term/GO:0070212
L-ascorbic acid binding	Gene Ontology	GO:0031418	4	14	0.0037551	0.0956673	P4HA2	PLOD2	P4HA1	OGFOD2	http://amigo.geneontology.org/amigo/term/GO:0031418
Cul4-RING E3 ubiquitin ligase complex	Gene Ontology	GO:0080008	4	14	0.0037551	0.0956673	DCAF7	DDB1	DCAF17	DCAF15	http://amigo.geneontology.org/amigo/term/GO:0080008
microtubule plus-end binding	Gene Ontology	GO:0051010	4	14	0.0037551	0.0956673	CLIP1	MAPRE1	CLASP1	MAPRE2	http://amigo.geneontology.org/amigo/term/GO:0051010
actin polymerization or depolymerization	Gene Ontology	GO:0008154	4	14	0.0037551	0.0956673	SVIL	ABI1	FLII	SCIN	http://amigo.geneontology.org/amigo/term/GO:0008154
negative regulation of myoblast differentiation	Gene Ontology	GO:0045662	4	14	0.0037551	0.0956673	DLL1	PPARD	NMRK2	TBX3	http://amigo.geneontology.org/amigo/term/GO:0045662
tricarboxylic acid cycle	Gene Ontology	GO:0006099	5	24	0.00388094	0.0979579	IDH3A	DLST	SUCLA2	MDH2	MDH1	http://amigo.geneontology.org/amigo/term/GO:0006099
midbody	Gene Ontology	GO:0030496	10	91	0.004207	0.105214	RAB11FIP3	ZFYVE19	KATNBL1	ASPM	HSP90B1	PKP4	CENPF	ANXA11	GNAI3	NAT10	http://amigo.geneontology.org/amigo/term/GO:0030496
histone acetylation	Gene Ontology	GO:0016573	5	25	0.00451758	0.110447	METTL8	TAF6	ING5	MSL3	ATF2	http://amigo.geneontology.org/amigo/term/GO:0016573
sulfate transmembrane transporter activity	Gene Ontology	GO:0015116	4	15	0.00461885	0.110447	SLC25A14	SLC26A11	SLC25A30	SLC25A10	http://amigo.geneontology.org/amigo/term/GO:0015116
DNA replication initiation	Gene Ontology	GO:0006270	4	15	0.00461885	0.110447	CDC45	ORC6	MCM10	TOPBP1	http://amigo.geneontology.org/amigo/term/GO:0006270
cellular response to interleukin-4	Gene Ontology	GO:0071353	4	15	0.00461885	0.110447	TCF7	RPLP0	FASN	MCM2	http://amigo.geneontology.org/amigo/term/GO:0071353
endopeptidase inhibitor activity	Gene Ontology	GO:0004866	4	15	0.00461885	0.110447	C3	RECK	C5	C4	http://amigo.geneontology.org/amigo/term/GO:0004866
protein homodimerization activity	Gene Ontology	GO:0042803	29	438	0.00483871	0.113977	GRPEL2	CCDC66	PHB2	HSF2	IDE	HIP1	MYH9	NR2F2	TMEM266	RELA	ABCD2	EXT2	PGRMC1	WRN	CENPF	CHUK	TP53I3	NUDT5	APPL1	SFPQ	ACOT7	STARD3NL	RAB11FIP3	LRP6	INPP5F	ACTN4	AGXT	SPPL2A	STARD3	http://amigo.geneontology.org/amigo/term/GO:0042803
negative regulation of endopeptidase activity	Gene Ontology	GO:0010951	9	78	0.00485007	0.113977	RECK	SERPINA10	CST3	TFPI	C3	SERPINI1	PTTG2	C5	C4	http://amigo.geneontology.org/amigo/term/GO:0010951
replication fork protection complex	Gene Ontology	GO:0031298	3	7	0.00497758	0.114024	CDC45	MCM10	TIPIN	http://amigo.geneontology.org/amigo/term/GO:0031298
marginal zone B cell differentiation	Gene Ontology	GO:0002315	3	7	0.00497758	0.114024	DLL1	LFNG	DOCK11	http://amigo.geneontology.org/amigo/term/GO:0002315
activation of MAPKKK activity	Gene Ontology	GO:0000185	3	7	0.00497758	0.114024	MAP4K3	MAP4K5	TRAF7	http://amigo.geneontology.org/amigo/term/GO:0000185
protein-DNA complex	Gene Ontology	GO:0032993	5	26	0.00522511	0.117096	CTNNB1	PRKDC	ZBTB17	POLR2H	PARP1	http://amigo.geneontology.org/amigo/term/GO:0032993
endocytic vesicle	Gene Ontology	GO:0030139	6	38	0.0053519	0.117096	RAB11FIP3	RAB24	EHD2	HEATR5B	RAB5A	SH3KBP1	http://amigo.geneontology.org/amigo/term/GO:0030139
activation of cysteine-type endopeptidase activity involved in apoptotic process	Gene Ontology	GO:0006919	6	38	0.0053519	0.117096	IFT57	ATP2A3	CASP8AP2	SENP1	HIP1	BID	http://amigo.geneontology.org/amigo/term/GO:0006919
multicellular organism growth	Gene Ontology	GO:0035264	8	65	0.00546251	0.11757	HHEX	PTPN11	ADARB1	RC3H2	MTOR	H3F3B	ATRX	TNKS2	http://amigo.geneontology.org/amigo/term/GO:0035264
cell aging	Gene Ontology	GO:0007569	4	16	0.00560677	0.11757	TBX3	NPM1	NOX4	SOD1	http://amigo.geneontology.org/amigo/term/GO:0007569
sulfate transmembrane transport	Gene Ontology	GO:1902358	4	16	0.00560677	0.11757	SLC25A14	SLC26A11	SLC25A30	SLC25A10	http://amigo.geneontology.org/amigo/term/GO:1902358
membrane protein ectodomain proteolysis	Gene Ontology	GO:0006509	4	16	0.00560677	0.11757	SPPL2A	APH1A	MYH9	ADAM9	http://amigo.geneontology.org/amigo/term/GO:0006509
endosome	Gene Ontology	GO:0005768	14	161	0.00565902	0.117759	BLOC1S6	MTMR4	RAB5A	PACSIN3	LRPAP1	ABCA2	TNFAIP1	RAB11B	SMPD1	FLOT1	FLOT2	RAB24	RAB12	CYBA	http://amigo.geneontology.org/amigo/term/GO:0005768
structural constituent of ribosome	Gene Ontology	GO:0003735	12	128	0.00587254	0.121277	MRPL10	MRPL37	MRPS25	MRPL21	RPS16	MRPL18	MRPS5	RPLP0	MRPL28	RPS15A	RPL36	RSL24D1	http://amigo.geneontology.org/amigo/term/GO:0003735
protein heterodimerization activity	Gene Ontology	GO:0046982	15	181	0.00640262	0.124732	ERBB2	TAF6	NFYB	EXT2	RRAGD	MLXIPL	HIP1	ITGA3	CHUK	ADRB1	CYBA	H3F3B	NAE1	EPAS1	TOP2B	http://amigo.geneontology.org/amigo/term/GO:0046982
GDP binding	Gene Ontology	GO:0019003	7	53	0.00649382	0.124732	RRAGD	SRP54	RAB5A	MRAS	RAB18	RAB12	GNAI3	http://amigo.geneontology.org/amigo/term/GO:0019003
nuclear pore outer ring	Gene Ontology	GO:0031080	3	8	0.00665746	0.124732	SEC13	NUP98	NUP107	http://amigo.geneontology.org/amigo/term/GO:0031080
positive regulation of interferon-alpha production	Gene Ontology	GO:0032727	3	8	0.00665746	0.124732	PTPN22	IFIH1	TBK1	http://amigo.geneontology.org/amigo/term/GO:0032727
protein auto-ADP-ribosylation	Gene Ontology	GO:0070213	3	8	0.00665746	0.124732	TNKS2	PARP1	PARP3	http://amigo.geneontology.org/amigo/term/GO:0070213
nuclear pore complex assembly	Gene Ontology	GO:0051292	3	8	0.00665746	0.124732	RTN4	NUP98	NUP107	http://amigo.geneontology.org/amigo/term/GO:0051292
RNA catabolic process	Gene Ontology	GO:0006401	3	8	0.00665746	0.124732	PNPT1	RNASET2	RNASEH2B	http://amigo.geneontology.org/amigo/term/GO:0006401
regulation of fibroblast migration	Gene Ontology	GO:0010762	3	8	0.00665746	0.124732	APPL1	SDC4	CORO1C	http://amigo.geneontology.org/amigo/term/GO:0010762
site of double-strand break	Gene Ontology	GO:0035861	6	40	0.00667335	0.124732	UFL1	PARP1	PARP3	SMARCAD1	UBXN7	ATF2	http://amigo.geneontology.org/amigo/term/GO:0035861
methylated histone binding	Gene Ontology	GO:0035064	6	40	0.00667335	0.124732	MSL3	MBTD1	ING5	ATRX	ING2	ING3	http://amigo.geneontology.org/amigo/term/GO:0035064
early endosome to late endosome transport	Gene Ontology	GO:0045022	4	17	0.00672619	0.124732	STX8	FAM160A2	RAB5A	WDR91	http://amigo.geneontology.org/amigo/term/GO:0045022
positive regulation of cell cycle	Gene Ontology	GO:0045787	4	17	0.00672619	0.124732	TBX3	CCPG1	LRP6	RPS15A	http://amigo.geneontology.org/amigo/term/GO:0045787
thyroid hormone receptor binding	Gene Ontology	GO:0046966	4	17	0.00672619	0.124732	TRIP12	MED16	ARID5A	MED12	http://amigo.geneontology.org/amigo/term/GO:0046966
positive regulation of interferon-beta production	Gene Ontology	GO:0032728	4	17	0.00672619	0.124732	PTPN22	PTPN11	IFIH1	TBK1	http://amigo.geneontology.org/amigo/term/GO:0032728
protein tyrosine kinase binding	Gene Ontology	GO:1990782	4	17	0.00672619	0.124732	BANK1	KHDRBS1	NOX4	PRR7	http://amigo.geneontology.org/amigo/term/GO:1990782
mitotic spindle assembly	Gene Ontology	GO:0090307	5	28	0.00686882	0.125667	BCCIP	MZT1	KIF11	CLASP1	CLASP2	http://amigo.geneontology.org/amigo/term/GO:0090307
phosphatidylinositol dephosphorylation	Gene Ontology	GO:0046856	5	28	0.00686882	0.125667	INPP5B	MTMR4	INPP5F	INPPL1	MTMR10	http://amigo.geneontology.org/amigo/term/GO:0046856
protein self-association	Gene Ontology	GO:0043621	5	29	0.00781281	0.138628	MYH9	ZNF639	CCDC88C	AGXT	FLT3	http://amigo.geneontology.org/amigo/term/GO:0043621
positive regulation of vascular endothelial growth factor production	Gene Ontology	GO:0010575	4	18	0.00798405	0.138628	C3	BRCA1	C5	SULF1	http://amigo.geneontology.org/amigo/term/GO:0010575
apoptotic signaling pathway	Gene Ontology	GO:0097190	4	18	0.00798405	0.138628	PPARD	HIP1	SGPL1	SENP1	http://amigo.geneontology.org/amigo/term/GO:0097190
protein-membrane adaptor activity	Gene Ontology	GO:0043495	4	18	0.00798405	0.138628	SUN2	MYH9	PDZD3	PDZK1	http://amigo.geneontology.org/amigo/term/GO:0043495
blood vessel remodeling	Gene Ontology	GO:0001974	4	18	0.00798405	0.138628	HOXA3	EPAS1	DLL4	CHD7	http://amigo.geneontology.org/amigo/term/GO:0001974
ribosome binding	Gene Ontology	GO:0043022	6	42	0.0082165	0.140112	EIF2A	EFL1	MTOR	EEF2	SRP72	SEC61A2	http://amigo.geneontology.org/amigo/term/GO:0043022
late endosome membrane	Gene Ontology	GO:0031902	6	42	0.0082165	0.140112	VPS36	WDR91	SPPL2A	STARD3	UBXN6	STARD3NL	http://amigo.geneontology.org/amigo/term/GO:0031902
GTPase activity	Gene Ontology	GO:0003924	17	223	0.00822733	0.140112	RRAGD	SRP54	RAB5A	SRPRA	REM1	EFTUD2	MRAS	MTG1	EFL1	RAB18	RAB11B	TUBD1	RAB24	SAR1B	RAB12	GNAI3	EEF2	http://amigo.geneontology.org/amigo/term/GO:0003924
GTP binding	Gene Ontology	GO:0005525	19	261	0.00843465	0.140112	RRAGD	SRP54	RAB5A	EHD2	RAB18	REM1	SRPRA	MRAS	ARL8BL	EFL1	MTG1	RAB11B	TUBD1	RAB24	SAR1B	RAB12	EFTUD2	GNAI3	EEF2	http://amigo.geneontology.org/amigo/term/GO:0005525
mRNA processing	Gene Ontology	GO:0006397	7	56	0.00846134	0.140112	SMNDC1	KHDRBS1	PTBP1	RBM39	RNASEL	THOC5	GPATCH1	http://amigo.geneontology.org/amigo/term/GO:0006397
endocytosis	Gene Ontology	GO:0006897	11	118	0.00846651	0.140112	STAB1	EHD2	INPPL1	STAB2	LRP6	HEATR5B	ENPP2	SNAP91	CD5	DENND1B	RAB5A	http://amigo.geneontology.org/amigo/term/GO:0006897
endoplasmic reticulum calcium ion homeostasis	Gene Ontology	GO:0032469	3	9	0.00863493	0.140112	HERPUD1	ITPR1	KCTD17	http://amigo.geneontology.org/amigo/term/GO:0032469
intra-S DNA damage checkpoint	Gene Ontology	GO:0031573	3	9	0.00863493	0.140112	ATF2	FANCD2	TIPIN	http://amigo.geneontology.org/amigo/term/GO:0031573
regulation of innate immune response	Gene Ontology	GO:0045088	3	9	0.00863493	0.140112	APPL1	TKFC	TREM-B1	http://amigo.geneontology.org/amigo/term/GO:0045088
positive regulation of membrane protein ectodomain proteolysis	Gene Ontology	GO:0051044	3	9	0.00863493	0.140112	GPLD1	PACSIN3	RGMA	http://amigo.geneontology.org/amigo/term/GO:0051044
positive regulation of double-strand break repair via homologous recombination	Gene Ontology	GO:1905168	3	9	0.00863493	0.140112	PARP1	MMS19	FANCB	http://amigo.geneontology.org/amigo/term/GO:1905168
small-subunit processome	Gene Ontology	GO:0032040	5	30	0.00884325	0.142643	DIEXF	MPHOSPH10	KRR1	UTP23	NOP14	http://amigo.geneontology.org/amigo/term/GO:0032040
protein ubiquitination	Gene Ontology	GO:0016567	18	244	0.00901812	0.143756	FSD1	HECTD2	HERPUD1	TRIM63	WWP2	TRIM45	TRAF7	TNFAIP1	RSPRY1	FBXL5	BSPRY	DCAF17	DCAF15	TRIM3	DDB1	CUL1	RNF213	TRPC4AP	http://amigo.geneontology.org/amigo/term/GO:0016567
cytoplasmic microtubule	Gene Ontology	GO:0005881	6	43	0.00907718	0.143756	CLASP2	CLASP1	CLIP1	TMEM214	MAPRE1	MAPRE2	http://amigo.geneontology.org/amigo/term/GO:0005881
oxidation-reduction process	Gene Ontology	GO:0055114	27	421	0.00932451	0.143756	CYP4B7	P4HA2	FDXR	P4HA1	NOX4	SELENOF	CYP2U1	CYP2J21	SMOX	OGFOD2	PLOD2	DHRS7	FASN	MECR	LDHA	DUS2	FMO3	SOD1	PDIA6	TP53I3	ALDH9A1	VAT1	NDOR1	F5	SDR16C5	TXNDC12	CTBP1	http://amigo.geneontology.org/amigo/term/GO:0055114
mitotic spindle pole	Gene Ontology	GO:0097431	4	19	0.00938685	0.143756	ASPM	BCCIP	NIN	KATNBL1	http://amigo.geneontology.org/amigo/term/GO:0097431
adipose tissue development	Gene Ontology	GO:0060612	4	19	0.00938685	0.143756	PIK3CA	PPARD	PAXIP1	ATF2	http://amigo.geneontology.org/amigo/term/GO:0060612
ATP-dependent chromatin remodeling	Gene Ontology	GO:0043044	4	19	0.00938685	0.143756	SMARCC2	SMARCAD1	SMARCC1	SMARCA5	http://amigo.geneontology.org/amigo/term/GO:0043044
spindle midzone	Gene Ontology	GO:0051233	4	19	0.00938685	0.143756	PKP4	MAPRE1	CDCA9	MAPRE2	http://amigo.geneontology.org/amigo/term/GO:0051233
limb development	Gene Ontology	GO:0060173	5	31	0.0099638	0.149786	CTNNB1	SLC39A3	RC3H2	IFT80	NR2F2	http://amigo.geneontology.org/amigo/term/GO:0060173
PML body	Gene Ontology	GO:0016605	7	58	0.00999601	0.149786	TOPBP1	CASP8AP2	SP3	RB1	MTOR	ATRX	N4BP1	http://amigo.geneontology.org/amigo/term/GO:0016605
ubiquitin-protein transferase activity	Gene Ontology	GO:0004842	9	89	0.0104183	0.154322	HECTD2	BRCA1	UBXN7	TRAF7	RSPRY1	TNFAIP1	TRIM45	CUL1	RNF213	http://amigo.geneontology.org/amigo/term/GO:0004842
enzyme binding	Gene Ontology	GO:0019899	11	122	0.0105282	0.154322	MCM10	MCM2	PCCA	PRKDC	MMS19	DDC	TNKS2	MDM4	COPS5	HNRNPUL1	NOP14	http://amigo.geneontology.org/amigo/term/GO:0019899
phosphate ion transmembrane transport	Gene Ontology	GO:0035435	3	10	0.0109204	0.154322	SLC25A14	SLC25A30	SLC25A10	http://amigo.geneontology.org/amigo/term/GO:0035435
actin filament severing	Gene Ontology	GO:0051014	3	10	0.0109204	0.154322	SVIL	FLII	SCIN	http://amigo.geneontology.org/amigo/term/GO:0051014
positive regulation of double-strand break repair via nonhomologous end joining	Gene Ontology	GO:2001034	3	10	0.0109204	0.154322	MAD2L2	PRKDC	PARP3	http://amigo.geneontology.org/amigo/term/GO:2001034
acyl-CoA hydrolase activity	Gene Ontology	GO:0047617	3	10	0.0109204	0.154322	ACOT7	BAAT	ACSBG2	http://amigo.geneontology.org/amigo/term/GO:0047617
protein polyubiquitination	Gene Ontology	GO:0000209	10	106	0.010936	0.154322	WWP2	LRSAM1	UBE2F	CTNNB1	RC3H2	DCAF15	TRIP12	TNKS2	SHPRH	UBE2S	http://amigo.geneontology.org/amigo/term/GO:0000209
microtubule bundle formation	Gene Ontology	GO:0001578	4	20	0.0109406	0.154322	CLIP1	CCDC66	MAPRE1	CLASP1	http://amigo.geneontology.org/amigo/term/GO:0001578
peptidyl-threonine phosphorylation	Gene Ontology	GO:0018107	6	45	0.0109884	0.154322	TBK1	CDK10	PRPF4B	MTOR	MAPK11	NLK	http://amigo.geneontology.org/amigo/term/GO:0018107
transcription coactivator activity	Gene Ontology	GO:0003713	12	140	0.0110112	0.154322	BRCA1	TAF6	NUP98	KMT2D	CTNNB1	MED12	USP16	MAPK11	WBP2NL	FHL5	TAF5L	MMS19	http://amigo.geneontology.org/amigo/term/GO:0003713
actin cytoskeleton	Gene Ontology	GO:0015629	12	140	0.0110112	0.154322	RAB5A	TOPBP1	MPRIP	MYH9	MYLK3	CORO1C	FLII	PARVB	SVIL	PPP1R9B	STK38L	SCIN	http://amigo.geneontology.org/amigo/term/GO:0015629
ATPase activity	Gene Ontology	GO:0016887	12	140	0.0110112	0.154322	CLPX	ABCD2	ENTPD2	ATP2A3	MYH9	ATP8A1	PEX6	ABCA2	RNF213	ABCB8	ABCC1	PSMC6	http://amigo.geneontology.org/amigo/term/GO:0016887
protein localization to plasma membrane	Gene Ontology	GO:0072659	9	90	0.0110958	0.154322	LRP6	EHD2	BAG4	SYTL2	PDZD3	FLOT1	FLOT2	RAB12	PDZK1	http://amigo.geneontology.org/amigo/term/GO:0072659
actin filament organization	Gene Ontology	GO:0007015	9	90	0.0110958	0.154322	MAD2L2	INPPL1	MPRIP	CORO1C	PPP1R9B	HIP1	SH3KBP1	ELMO2	CORO7	http://amigo.geneontology.org/amigo/term/GO:0007015
Ras protein signal transduction	Gene Ontology	GO:0007265	5	32	0.011178	0.154676	RASSF1	DOK3	MRAS	RB1	RASGRP3	http://amigo.geneontology.org/amigo/term/GO:0007265
DNA repair	Gene Ontology	GO:0006281	10	107	0.0115746	0.159356	INTS3	MAD2L2	PARPBP	WRN	RFC1	PARP1	CHAF1B	DDB1	NPM1	MMS19	http://amigo.geneontology.org/amigo/term/GO:0006281
Golgi apparatus	Gene Ontology	GO:0005794	32	534	0.0120533	0.165112	ERGIC2	ZDHHC18	SLC30A6	HIP1	CORO7	APH1A	OPTN	WDR44	IFT57	INPPL1	GCNT2	SULF1	RAB18	GOLGA4	ING2	CLASP1	FASN	RAB12	MAPRE1	EXT2	ST3GAL5	PAQR3	ATP8A1	COMMD9	SAR1B	KIFC3	TMEM87A	SLC26A11	LRP6	ACSL3	TMEM214	MMD	http://amigo.geneontology.org/amigo/term/GO:0005794
lysosome	Gene Ontology	GO:0005764	12	142	0.0121295	0.165325	RRAGD	ACP5	VPS36	PSAP	UNC13D	SMPD1	CAPN1	LAMTOR5	ABCA2	CTSO	RAB12	GUSB	http://amigo.geneontology.org/amigo/term/GO:0005764
positive regulation of apoptotic process	Gene Ontology	GO:0043065	11	125	0.0123117	0.1658	TGM2	GPLD1	CALHM2	APBB1	PRKDC	TNFRSF10B	LATS1	GRIN2A	KLF11	ING3	SCIN	http://amigo.geneontology.org/amigo/term/GO:0043065
microtubule organizing center	Gene Ontology	GO:0005815	5	33	0.0124892	0.1658	CNTRL	MAPRE1	CLASP2	CLASP1	MAPRE2	http://amigo.geneontology.org/amigo/term/GO:0005815
regulation of inflammatory response	Gene Ontology	GO:0050727	5	33	0.0124892	0.1658	UFL1	IL1R1	RELA	FANCA	FANCD2	http://amigo.geneontology.org/amigo/term/GO:0050727
replication fork processing	Gene Ontology	GO:0031297	4	21	0.0126509	0.1658	WRN	ATRX	PRIMPOL	NUCKS1	http://amigo.geneontology.org/amigo/term/GO:0031297
cytoplasmic dynein complex	Gene Ontology	GO:0005868	4	21	0.0126509	0.1658	NUDCD3	DYNC1I2	DYNC1LI2	SNX4	http://amigo.geneontology.org/amigo/term/GO:0005868
proteolysis involved in cellular protein catabolic process	Gene Ontology	GO:0051603	4	21	0.0126509	0.1658	IDE	CLPX	RSPRY1	CTSO	http://amigo.geneontology.org/amigo/term/GO:0051603
regulation of multicellular organism growth	Gene Ontology	GO:0040014	4	21	0.0126509	0.1658	PIK3CA	SGPL1	TNKS2	SOD1	http://amigo.geneontology.org/amigo/term/GO:0040014
pyridoxal phosphate binding	Gene Ontology	GO:0030170	6	47	0.0131678	0.168312	PHYKPL	AGXT	SGPL1	CSAD	DDC	THNSL2	http://amigo.geneontology.org/amigo/term/GO:0030170
regulation of cell cycle	Gene Ontology	GO:0051726	8	77	0.01332	0.168312	CDKL2	NUP214	USP16	CDK5	CABLES1	CTBP1	ADARB1	COPS5	http://amigo.geneontology.org/amigo/term/GO:0051726
cyclosporin A binding	Gene Ontology	GO:0016018	3	11	0.0135218	0.168312	PPIG	PPIF	NKTR	http://amigo.geneontology.org/amigo/term/GO:0016018
regulation of protein localization to plasma membrane	Gene Ontology	GO:1903076	3	11	0.0135218	0.168312	STX8	SDC4	APPL1	http://amigo.geneontology.org/amigo/term/GO:1903076
alternative mRNA splicing, via spliceosome	Gene Ontology	GO:0000380	3	11	0.0135218	0.168312	SFPQ	SFSWAP	PUF60	http://amigo.geneontology.org/amigo/term/GO:0000380
protein ADP-ribosylase activity	Gene Ontology	GO:1990404	3	11	0.0135218	0.168312	TNKS2	PARP1	PARP3	http://amigo.geneontology.org/amigo/term/GO:1990404
RNA polymerase binding	Gene Ontology	GO:0070063	3	11	0.0135218	0.168312	CCNT1	BRCA1	TCERG1	http://amigo.geneontology.org/amigo/term/GO:0070063
negative regulation of transcription elongation from RNA polymerase II promoter	Gene Ontology	GO:0034244	3	11	0.0135218	0.168312	NELFA	EZH2	UBXN7	http://amigo.geneontology.org/amigo/term/GO:0034244
microtubule anchoring	Gene Ontology	GO:0034453	3	11	0.0135218	0.168312	BCCIP	CEP350	CLASP1	http://amigo.geneontology.org/amigo/term/GO:0034453
NADPH binding	Gene Ontology	GO:0070402	3	11	0.0135218	0.168312	DECR1	TP53I3	DUS2	http://amigo.geneontology.org/amigo/term/GO:0070402
positive regulation of histone H3-K4 methylation	Gene Ontology	GO:0051571	3	11	0.0135218	0.168312	BRCA1	CTR9	PAXIP1	http://amigo.geneontology.org/amigo/term/GO:0051571
mitochondrial respiratory chain complex I assembly	Gene Ontology	GO:0032981	5	34	0.0139007	0.171463	NDUFAF5	NDUFAF4	TAZ	NUBPL	BCS1L	http://amigo.geneontology.org/amigo/term/GO:0032981
defense response to Gram-positive bacterium	Gene Ontology	GO:0050830	5	34	0.0139007	0.171463	CHGA	STAB2	ACP5	TBK1	FAU	http://amigo.geneontology.org/amigo/term/GO:0050830
DNA duplex unwinding	Gene Ontology	GO:0032508	6	48	0.0143635	0.175173	CHD7	WRN	POT1	WRNIP1	CHTF18	DHX36	http://amigo.geneontology.org/amigo/term/GO:0032508
peroxisomal membrane	Gene Ontology	GO:0005778	4	22	0.0145228	0.175173	ABCD2	PDCD2	PNPLA8	PEX6	http://amigo.geneontology.org/amigo/term/GO:0005778
estrogen receptor binding	Gene Ontology	GO:0030331	4	22	0.0145228	0.175173	CTNNB1	LATS1	MMS19	ARID5A	http://amigo.geneontology.org/amigo/term/GO:0030331
response to UV	Gene Ontology	GO:0009411	4	22	0.0145228	0.175173	MAD2L2	MAP4K3	PRIMPOL	TIPIN	http://amigo.geneontology.org/amigo/term/GO:0009411
phospholipid translocation	Gene Ontology	GO:0045332	4	22	0.0145228	0.175173	ATP11C	ATP8A1	ATP10D	ABCC1	http://amigo.geneontology.org/amigo/term/GO:0045332
mitochondrial membrane	Gene Ontology	GO:0031966	5	35	0.0154156	0.185123	NDUFAF4	ABCB8	SLC25A30	TAZ	GPAT2	http://amigo.geneontology.org/amigo/term/GO:0031966
transcription, DNA-templated	Gene Ontology	GO:0006351	7	64	0.0158106	0.189034	TCEANC2	FUBP3	ASXL2	TCEA3	CCNT1	TCEANC	ILF2	http://amigo.geneontology.org/amigo/term/GO:0006351
histone H3-K4 trimethylation	Gene Ontology	GO:0080182	3	12	0.0164448	0.191291	OGT	CTR9	KMT2D	http://amigo.geneontology.org/amigo/term/GO:0080182
peptide catabolic process	Gene Ontology	GO:0043171	3	12	0.0164448	0.191291	LTA4H	IDE	NPEPPS	http://amigo.geneontology.org/amigo/term/GO:0043171
epithelial tube branching involved in lung morphogenesis	Gene Ontology	GO:0060441	3	12	0.0164448	0.191291	CTNNB1	LAMA1	DLG5	http://amigo.geneontology.org/amigo/term/GO:0060441
DNA damage response, signal transduction by p53 class mediator	Gene Ontology	GO:0030330	3	12	0.0164448	0.191291	ATRX	MDM4	PAXIP1	http://amigo.geneontology.org/amigo/term/GO:0030330
magnesium ion transmembrane transport	Gene Ontology	GO:1903830	3	12	0.0164448	0.191291	NIPAL1	NIPA1	CNNM4	http://amigo.geneontology.org/amigo/term/GO:1903830
long-chain fatty acid-CoA ligase activity	Gene Ontology	GO:0004467	3	12	0.0164448	0.191291	SLC27A4	ACSBG2	ACSL3	http://amigo.geneontology.org/amigo/term/GO:0004467
energy homeostasis	Gene Ontology	GO:0097009	4	23	0.0165608	0.191291	DLL1	EIF4G1	PASK	PIK3CA	http://amigo.geneontology.org/amigo/term/GO:0097009
recycling endosome	Gene Ontology	GO:0055037	7	65	0.0169724	0.194398	STX8	OPTN	INPP5F	SLC9A9	RAB11B	ATP11C	RAB12	http://amigo.geneontology.org/amigo/term/GO:0055037
positive regulation of GTPase activity	Gene Ontology	GO:0043547	14	187	0.0177168	0.201548	ERBB2	RASGRP3	ARAP3	MAPRE2	ARHGAP1	ADRB1	PKP4	DENND1B	SIPA1L1	PREX2	ARHGAP28	EZH2	DOCK11	RGMA	http://amigo.geneontology.org/amigo/term/GO:0043547
peptidyl-serine phosphorylation	Gene Ontology	GO:0018105	10	115	0.0177445	0.201548	NEK6	SGK3	TBK1	PRPF4B	CHUK	PRKDC	LATS1	MTOR	MAPK11	STK38L	http://amigo.geneontology.org/amigo/term/GO:0018105
double-strand break repair via homologous recombination	Gene Ontology	GO:0000724	7	66	0.0181931	0.205786	BRCA1	MAD2L2	WRN	PRKDC	SFPQ	NUCKS1	NABP2	http://amigo.geneontology.org/amigo/term/GO:0000724
chromosome segregation	Gene Ontology	GO:0007059	5	37	0.018767	0.208835	NEK6	CENPN	NDC80	BRCA1	MMS19	http://amigo.geneontology.org/amigo/term/GO:0007059
cleavage furrow	Gene Ontology	GO:0032154	4	24	0.0187691	0.208835	RAB11FIP3	MYH9	ZFYVE19	KATNBL1	http://amigo.geneontology.org/amigo/term/GO:0032154
glucose metabolic process	Gene Ontology	GO:0006006	4	24	0.0187691	0.208835	HK2	PIK3CA	PGM2	INPPL1	http://amigo.geneontology.org/amigo/term/GO:0006006
cortical actin cytoskeleton organization	Gene Ontology	GO:0030866	4	24	0.0187691	0.208835	EPB41L1	STRIP1	EHD2	FMNL2	http://amigo.geneontology.org/amigo/term/GO:0030866
platelet formation	Gene Ontology	GO:0030220	3	13	0.0196931	0.214733	PTPN11	MYH9	NBEAL2	http://amigo.geneontology.org/amigo/term/GO:0030220
superoxide anion generation	Gene Ontology	GO:0042554	3	13	0.0196931	0.214733	CYBA	NOX4	SOD1	http://amigo.geneontology.org/amigo/term/GO:0042554
posttranscriptional regulation of gene expression	Gene Ontology	GO:0010608	3	13	0.0196931	0.214733	RC3H2	GCNT2	CDC37	http://amigo.geneontology.org/amigo/term/GO:0010608
acyl-CoA metabolic process	Gene Ontology	GO:0006637	3	13	0.0196931	0.214733	ACOT7	BAAT	OXSM	http://amigo.geneontology.org/amigo/term/GO:0006637
positive regulation of peptidyl-tyrosine phosphorylation	Gene Ontology	GO:0050731	5	38	0.020609	0.214915	ENPP2	PTPN11	VEGFA	MTOR	BANK1	http://amigo.geneontology.org/amigo/term/GO:0050731
endoplasmic reticulum lumen	Gene Ontology	GO:0005788	5	38	0.020609	0.214915	P4HA2	P4HA1	SELENOF	HSP90B1	TXNDC12	http://amigo.geneontology.org/amigo/term/GO:0005788
tumor necrosis factor-mediated signaling pathway	Gene Ontology	GO:0033209	4	25	0.0211512	0.214915	RELA	KRT18	CHUK	ACTN4	http://amigo.geneontology.org/amigo/term/GO:0033209
telomere maintenance	Gene Ontology	GO:0000723	4	25	0.0211512	0.214915	WRN	PRKDC	POT1	PARP3	http://amigo.geneontology.org/amigo/term/GO:0000723
neural tube closure	Gene Ontology	GO:0001843	6	53	0.0214841	0.214915	PLXNB2	LIAS	IFT57	SDC4	MED12	RGMA	http://amigo.geneontology.org/amigo/term/GO:0001843
protein kinase binding	Gene Ontology	GO:0019901	18	270	0.0217153	0.214915	NEK6	STRIP1	NBEAL2	ACSL3	ZC3HC1	PRKAG2	PARP1	CDC37	CTNNB1	LATS1	UTRN	KIF11	CCNT1	RELA	MAPRE2	MAPRE1	EEF2	ATF2	http://amigo.geneontology.org/amigo/term/GO:0019901
cell population proliferation	Gene Ontology	GO:0008283	8	85	0.0218562	0.214915	IRF2	MCM10	IL18RAP	YME1L1	DAZAP1	ALKBH3	H3F3B	CUL1	http://amigo.geneontology.org/amigo/term/GO:0008283
iron ion binding	Gene Ontology	GO:0005506	9	102	0.022012	0.214915	CYP2J21	NFU1	OGFOD2	PLOD2	CYP4B7	FBXL5	P4HA2	P4HA1	CYP2U1	http://amigo.geneontology.org/amigo/term/GO:0005506
carbohydrate metabolic process	Gene Ontology	GO:0005975	7	69	0.0222229	0.214915	GNPDA2	PGLS	PGGHG	MDH2	MDH1	LDHA	CHST6	http://amigo.geneontology.org/amigo/term/GO:0005975
ossification	Gene Ontology	GO:0001503	5	39	0.022565	0.214915	CLEC3B	ACP5	SP3	EXT2	DHX36	http://amigo.geneontology.org/amigo/term/GO:0001503
regulation of GTPase activity	Gene Ontology	GO:0043087	5	39	0.022565	0.214915	PLXNB2	GPR137B	FGD6	MTOR	SOD1	http://amigo.geneontology.org/amigo/term/GO:0043087
rRNA processing	Gene Ontology	GO:0006364	6	54	0.0231496	0.214915	DDX49	ESF1	CHD7	KRR1	RRP12	MPHOSPH10	http://amigo.geneontology.org/amigo/term/GO:0006364
nuclear chromosome, telomeric region	Gene Ontology	GO:0000784	6	54	0.0231496	0.214915	SUN2	POT1	WRNIP1	POLR2B	NABP2	THOC5	http://amigo.geneontology.org/amigo/term/GO:0000784
regulation of embryonic development	Gene Ontology	GO:0045995	3	14	0.0232685	0.214915	LAMA1	TRIP12	DHX36	http://amigo.geneontology.org/amigo/term/GO:0045995
long-chain fatty acid metabolic process	Gene Ontology	GO:0001676	3	14	0.0232685	0.214915	SLC27A4	ACSBG2	ACSL3	http://amigo.geneontology.org/amigo/term/GO:0001676
positive regulation of microtubule polymerization	Gene Ontology	GO:0031116	3	14	0.0232685	0.214915	MAPRE1	CLIP1	NIN	http://amigo.geneontology.org/amigo/term/GO:0031116
oogenesis	Gene Ontology	GO:0048477	3	14	0.0232685	0.214915	ASPM	H3F3B	NAIF1	http://amigo.geneontology.org/amigo/term/GO:0048477
antiporter activity	Gene Ontology	GO:0015297	3	14	0.0232685	0.214915	SLC25A14	SLC25A30	SLC25A10	http://amigo.geneontology.org/amigo/term/GO:0015297
cellular response to virus	Gene Ontology	GO:0098586	3	14	0.0232685	0.214915	LGALS8	CHUK	MAPK11	http://amigo.geneontology.org/amigo/term/GO:0098586
heterochromatin	Gene Ontology	GO:0000792	3	14	0.0232685	0.214915	SMARCAD1	TOP2B	NPTXR	http://amigo.geneontology.org/amigo/term/GO:0000792
maturation of LSU-rRNA from tricistronic rRNA transcript (SSU-rRNA, 5.8S rRNA, LSU-rRNA)	Gene Ontology	GO:0000463	3	14	0.0232685	0.214915	RPF2	BOP1	NIFK	http://amigo.geneontology.org/amigo/term/GO:0000463
histone acetyltransferase activity	Gene Ontology	GO:0004402	4	26	0.0237102	0.214915	METTL8	TAF5L	ING3	ATF2	http://amigo.geneontology.org/amigo/term/GO:0004402
ceramide biosynthetic process	Gene Ontology	GO:0046513	4	26	0.0237102	0.214915	CERS2	SMPD1	AGK	ELOVL1	http://amigo.geneontology.org/amigo/term/GO:0046513
chromosome, telomeric region	Gene Ontology	GO:0000781	4	26	0.0237102	0.214915	WRN	EZH2	DHX36	POT1	http://amigo.geneontology.org/amigo/term/GO:0000781
positive regulation of glucose import	Gene Ontology	GO:0046326	4	26	0.0237102	0.214915	APPL1	PTPN11	RNASEL	CLTCL1	http://amigo.geneontology.org/amigo/term/GO:0046326
cell fate specification	Gene Ontology	GO:0001708	4	26	0.0237102	0.214915	TBX21	TBX3	MGA	CTNNB1	http://amigo.geneontology.org/amigo/term/GO:0001708
fatty acid beta-oxidation	Gene Ontology	GO:0006635	4	26	0.0237102	0.214915	ABCD2	ECI1	DECR1	PPARD	http://amigo.geneontology.org/amigo/term/GO:0006635
NAD binding	Gene Ontology	GO:0051287	4	26	0.0237102	0.214915	IDH3A	CTBP1	NDUFS2	PARP1	http://amigo.geneontology.org/amigo/term/GO:0051287
protein N-terminus binding	Gene Ontology	GO:0047485	6	55	0.0248997	0.214915	SMARCC1	HESX1	PARP1	PHB2	VWF	RELA	http://amigo.geneontology.org/amigo/term/GO:0047485
chromatin	Gene Ontology	GO:0000785	7	71	0.0252289	0.214915	RBL1	PARPBP	RB1	COPS5	SFPQ	MCM2	TRIM45	http://amigo.geneontology.org/amigo/term/GO:0000785
DNA synthesis involved in DNA repair	Gene Ontology	GO:0000731	2	5	0.0253505	0.214915	WRN	WRNIP1	http://amigo.geneontology.org/amigo/term/GO:0000731
voluntary musculoskeletal movement	Gene Ontology	GO:0050882	2	5	0.0253505	0.214915	ITPR1	MTOR	http://amigo.geneontology.org/amigo/term/GO:0050882
ADP-ribosylation factor binding	Gene Ontology	GO:0030306	2	5	0.0253505	0.214915	RAB11FIP3	GGA3	http://amigo.geneontology.org/amigo/term/GO:0030306
non-membrane spanning protein tyrosine phosphatase activity	Gene Ontology	GO:0004726	2	5	0.0253505	0.214915	PTPN22	PTPN11	http://amigo.geneontology.org/amigo/term/GO:0004726
eukaryotic translation initiation factor 4F complex	Gene Ontology	GO:0016281	2	5	0.0253505	0.214915	EIF4G3	EIF4G1	http://amigo.geneontology.org/amigo/term/GO:0016281
regulation of regulatory T cell differentiation	Gene Ontology	GO:0045589	2	5	0.0253505	0.214915	FANCA	FANCD2	http://amigo.geneontology.org/amigo/term/GO:0045589
regulation of skeletal muscle satellite cell proliferation	Gene Ontology	GO:0014842	2	5	0.0253505	0.214915	PPARD	PAXBP1	http://amigo.geneontology.org/amigo/term/GO:0014842
regulation of cellular respiration	Gene Ontology	GO:0043457	2	5	0.0253505	0.214915	PIK3CA	PNPT1	http://amigo.geneontology.org/amigo/term/GO:0043457
transcription initiation from RNA polymerase III promoter	Gene Ontology	GO:0006384	2	5	0.0253505	0.214915	CRCP	GTF3C1	http://amigo.geneontology.org/amigo/term/GO:0006384
bubble DNA binding	Gene Ontology	GO:0000405	2	5	0.0253505	0.214915	WRN	NEIL3	http://amigo.geneontology.org/amigo/term/GO:0000405
cellular response to steroid hormone stimulus	Gene Ontology	GO:0071383	2	5	0.0253505	0.214915	URI1	TFPI	http://amigo.geneontology.org/amigo/term/GO:0071383
negative regulation of mitochondrial fusion	Gene Ontology	GO:0010637	2	5	0.0253505	0.214915	VAT1	ADCK1	http://amigo.geneontology.org/amigo/term/GO:0010637
nose development	Gene Ontology	GO:0043584	2	5	0.0253505	0.214915	HESX1	CHD7	http://amigo.geneontology.org/amigo/term/GO:0043584
atrioventricular canal development	Gene Ontology	GO:0036302	2	5	0.0253505	0.214915	PTPN11	CHD7	http://amigo.geneontology.org/amigo/term/GO:0036302
mitochondrial DNA repair	Gene Ontology	GO:0043504	2	5	0.0253505	0.214915	PARP1	PRIMPOL	http://amigo.geneontology.org/amigo/term/GO:0043504
palmitoyl-CoA hydrolase activity	Gene Ontology	GO:0016290	2	5	0.0253505	0.214915	ACOT7	PDCD2	http://amigo.geneontology.org/amigo/term/GO:0016290
DNA dealkylation involved in DNA repair	Gene Ontology	GO:0006307	2	5	0.0253505	0.214915	ALKBH2	ALKBH3	http://amigo.geneontology.org/amigo/term/GO:0006307
-	Gene Ontology	GO:0090197	2	5	0.0253505	0.214915	IL1RL1	C5	http://amigo.geneontology.org/amigo/term/GO:0090197
positive regulation of myoblast proliferation	Gene Ontology	GO:2000288	2	5	0.0253505	0.214915	PPARD	PAXBP1	http://amigo.geneontology.org/amigo/term/GO:2000288
positive regulation of mucus secretion	Gene Ontology	GO:0070257	2	5	0.0253505	0.214915	CYBA	SYTL2	http://amigo.geneontology.org/amigo/term/GO:0070257
mitochondrial ATP synthesis coupled electron transport	Gene Ontology	GO:0042775	2	5	0.0253505	0.214915	NDUFV3	TAZ	http://amigo.geneontology.org/amigo/term/GO:0042775
membrane protein intracellular domain proteolysis	Gene Ontology	GO:0031293	2	5	0.0253505	0.214915	SPPL2A	APH1A	http://amigo.geneontology.org/amigo/term/GO:0031293
SUMO-specific protease activity	Gene Ontology	GO:0016929	2	5	0.0253505	0.214915	SENP6	SENP1	http://amigo.geneontology.org/amigo/term/GO:0016929
telomere capping	Gene Ontology	GO:0016233	2	5	0.0253505	0.214915	POT1	PRKDC	http://amigo.geneontology.org/amigo/term/GO:0016233
cellular response to indole-3-methanol	Gene Ontology	GO:0071681	2	5	0.0253505	0.214915	CTNNB1	BRCA1	http://amigo.geneontology.org/amigo/term/GO:0071681
alpha-beta T cell differentiation	Gene Ontology	GO:0046632	2	5	0.0253505	0.214915	TCF7	PRR7	http://amigo.geneontology.org/amigo/term/GO:0046632
meiotic spindle organization	Gene Ontology	GO:0000212	2	5	0.0253505	0.214915	ATRX	MYH9	http://amigo.geneontology.org/amigo/term/GO:0000212
medium-chain fatty acid biosynthetic process	Gene Ontology	GO:0051792	2	5	0.0253505	0.214915	ACOT7	OXSM	http://amigo.geneontology.org/amigo/term/GO:0051792
CIA complex	Gene Ontology	GO:0097361	2	5	0.0253505	0.214915	CIAO1	MMS19	http://amigo.geneontology.org/amigo/term/GO:0097361
positive regulation of lamellipodium morphogenesis	Gene Ontology	GO:2000394	2	5	0.0253505	0.214915	CORO1C	ENPP2	http://amigo.geneontology.org/amigo/term/GO:2000394
regulation of smooth muscle cell proliferation	Gene Ontology	GO:0048660	2	5	0.0253505	0.214915	CTNNB1	PRKDC	http://amigo.geneontology.org/amigo/term/GO:0048660
amyloid-beta clearance by transcytosis	Gene Ontology	GO:0150093	2	5	0.0253505	0.214915	LRPAP1	RAB5A	http://amigo.geneontology.org/amigo/term/GO:0150093
procollagen-proline 4-dioxygenase activity	Gene Ontology	GO:0004656	2	5	0.0253505	0.214915	P4HA2	P4HA1	http://amigo.geneontology.org/amigo/term/GO:0004656
T cell receptor V(D)J recombination	Gene Ontology	GO:0033153	2	5	0.0253505	0.214915	TCF7	PRKDC	http://amigo.geneontology.org/amigo/term/GO:0033153
basal cortex	Gene Ontology	GO:0045180	2	5	0.0253505	0.214915	CLASP2	CLASP1	http://amigo.geneontology.org/amigo/term/GO:0045180
regulation of endopeptidase activity	Gene Ontology	GO:0052548	2	5	0.0253505	0.214915	PSMA3	ABCA2	http://amigo.geneontology.org/amigo/term/GO:0052548
DNA-binding transcription factor activity	Gene Ontology	GO:0003700	15	216	0.0253861	0.214915	UBP1	FOXN3	ZNF639	HSF2	HNF4beta	MLXIPL	ASCL3	ZNF687	NR2F2	POGZ	CTNNB1	HOXA3	ZNF236	ATF2	ATOH8	http://amigo.geneontology.org/amigo/term/GO:0003700
protein stabilization	Gene Ontology	GO:0050821	9	105	0.0256475	0.216456	HSF2	PEX6	PHB2	HIP1	CDC37	RTN4	NLK	CAMLG	MDM4	http://amigo.geneontology.org/amigo/term/GO:0050821
positive regulation of protein tyrosine kinase activity	Gene Ontology	GO:0061098	4	27	0.0264488	0.221164	AGT	SDC4	NOX4	ABI1	http://amigo.geneontology.org/amigo/term/GO:0061098
skin development	Gene Ontology	GO:0043588	4	27	0.0264488	0.221164	CTNNB1	SLC27A4	ITGA3	DACT2	http://amigo.geneontology.org/amigo/term/GO:0043588
negative regulation of protein catabolic process	Gene Ontology	GO:0042177	4	27	0.0264488	0.221164	MAD2L2	RELA	GRIN2A	MDM4	http://amigo.geneontology.org/amigo/term/GO:0042177
SH3 domain binding	Gene Ontology	GO:0017124	6	56	0.0267358	0.222201	PTPN22	AFAP1L1	ABI1	KHDRBS1	ADAM9	CYBA	http://amigo.geneontology.org/amigo/term/GO:0017124
dephosphorylation	Gene Ontology	GO:0016311	6	56	0.0267358	0.222201	ACP5	PLPP7	NT5C3B	PRUNE1	NT5DC4	THNSL2	http://amigo.geneontology.org/amigo/term/GO:0016311
DNA polymerase binding	Gene Ontology	GO:0070182	3	15	0.0271712	0.223772	NABP2	FANCD2	NAT10	http://amigo.geneontology.org/amigo/term/GO:0070182
ATPase-coupled intramembrane lipid transporter activity	Gene Ontology	GO:0140326	3	15	0.0271712	0.223772	ATP11C	ATP8A1	ATP10D	http://amigo.geneontology.org/amigo/term/GO:0140326
single-stranded DNA helicase activity	Gene Ontology	GO:0017116	3	15	0.0271712	0.223772	MCM2	CHTF18	WRNIP1	http://amigo.geneontology.org/amigo/term/GO:0017116
lysosomal membrane	Gene Ontology	GO:0005765	8	90	0.0288275	0.229361	ARL8BL	LAPTM5	MTOR	GPR137B	SPPL2A	CCZ1	UBXN6	SLC26A11	http://amigo.geneontology.org/amigo/term/GO:0005765
negative regulation of DNA-binding transcription factor activity	Gene Ontology	GO:0043433	5	42	0.0291391	0.229361	PHB2	MAD2L2	EZH2	WWP2	PAXIP1	http://amigo.geneontology.org/amigo/term/GO:0043433
translational initiation	Gene Ontology	GO:0006413	4	28	0.0293689	0.229361	EIF4G3	EIF4G1	EIF2B2	EIF2A	http://amigo.geneontology.org/amigo/term/GO:0006413
negative regulation of MAP kinase activity	Gene Ontology	GO:0043407	4	28	0.0293689	0.229361	PAQR3	AGT	SMPD1	SH2B3	http://amigo.geneontology.org/amigo/term/GO:0043407
negative regulation of phosphatase activity	Gene Ontology	GO:0010923	4	28	0.0293689	0.229361	MPHOSPH10	URI1	CSRNP2	SYTL2	http://amigo.geneontology.org/amigo/term/GO:0010923
phosphoprotein binding	Gene Ontology	GO:0051219	4	28	0.0293689	0.229361	MTOR	RB1	TBK1	URI1	http://amigo.geneontology.org/amigo/term/GO:0051219
proteasome-mediated ubiquitin-dependent protein catabolic process	Gene Ontology	GO:0043161	9	108	0.0296888	0.229361	WWP2	TBX21	TNFAIP1	CTNNB1	PSMA3	KCTD17	TRIM3	DDB1	CUL1	http://amigo.geneontology.org/amigo/term/GO:0043161
mitochondrial outer membrane	Gene Ontology	GO:0005741	6	58	0.030672	0.229361	PGRMC1	PHB2	BID	HK2	VDAC3	ATF2	http://amigo.geneontology.org/amigo/term/GO:0005741
kinetochore	Gene Ontology	GO:0000776	6	58	0.030672	0.229361	CLASP2	CLASP1	NUP98	NUP107	SPOUT1	NDC80	http://amigo.geneontology.org/amigo/term/GO:0000776
megakaryocyte development	Gene Ontology	GO:0035855	3	16	0.0313997	0.229361	PTPN11	ABI1	SH2B3	http://amigo.geneontology.org/amigo/term/GO:0035855
K63-linked polyubiquitin modification-dependent protein binding	Gene Ontology	GO:0070530	3	16	0.0313997	0.229361	OTUD7B	OPTN	UBXN7	http://amigo.geneontology.org/amigo/term/GO:0070530
mitotic G2 DNA damage checkpoint	Gene Ontology	GO:0007095	3	16	0.0313997	0.229361	FOXN3	TOPBP1	DONSON	http://amigo.geneontology.org/amigo/term/GO:0007095
MAP kinase activity	Gene Ontology	GO:0004707	3	16	0.0313997	0.229361	ICK	NLK	MAPK11	http://amigo.geneontology.org/amigo/term/GO:0004707
innervation	Gene Ontology	GO:0060384	3	16	0.0313997	0.229361	SULF1	CHD7	ADARB1	http://amigo.geneontology.org/amigo/term/GO:0060384
microtubule plus-end	Gene Ontology	GO:0035371	3	16	0.0313997	0.229361	CLIP1	MAPRE1	MAPRE2	http://amigo.geneontology.org/amigo/term/GO:0035371
negative regulation of double-strand break repair via homologous recombination	Gene Ontology	GO:2000042	3	16	0.0313997	0.229361	MAD2L2	FANCB	PARPBP	http://amigo.geneontology.org/amigo/term/GO:2000042
ferrous iron binding	Gene Ontology	GO:0008198	3	16	0.0313997	0.229361	ACP5	ALKBH2	ALKBH3	http://amigo.geneontology.org/amigo/term/GO:0008198
cellular response to hypoxia	Gene Ontology	GO:0071456	5	43	0.0315719	0.229361	MTOR	PPARD	NPEPPS	MDM4	EPAS1	http://amigo.geneontology.org/amigo/term/GO:0071456
polysome	Gene Ontology	GO:0005844	4	29	0.0324724	0.229361	EIF4G1	HDLBP	NAA30	EEF2	http://amigo.geneontology.org/amigo/term/GO:0005844
skeletal muscle tissue development	Gene Ontology	GO:0007519	4	29	0.0324724	0.229361	METTL8	SVIL	TAZ	NR2F2	http://amigo.geneontology.org/amigo/term/GO:0007519
regulation of mitotic cell cycle	Gene Ontology	GO:0007346	4	29	0.0324724	0.229361	BIRC5	RBL1	RB1	CDK10	http://amigo.geneontology.org/amigo/term/GO:0007346
phosphate ion binding	Gene Ontology	GO:0042301	2	6	0.0329822	0.229361	RELA	SLC34A2	http://amigo.geneontology.org/amigo/term/GO:0042301
regulation of G2/M transition of mitotic cell cycle	Gene Ontology	GO:0010389	2	6	0.0329822	0.229361	CENPF	RNASEH2B	http://amigo.geneontology.org/amigo/term/GO:0010389
cellular response to cholesterol	Gene Ontology	GO:0071397	2	6	0.0329822	0.229361	GPLD1	LRP6	http://amigo.geneontology.org/amigo/term/GO:0071397
DNA replication-dependent nucleosome assembly	Gene Ontology	GO:0006335	2	6	0.0329822	0.229361	NASP	CHAF1B	http://amigo.geneontology.org/amigo/term/GO:0006335
error-prone translesion synthesis	Gene Ontology	GO:0042276	2	6	0.0329822	0.229361	MAD2L2	PRIMPOL	http://amigo.geneontology.org/amigo/term/GO:0042276
glial cell-derived neurotrophic factor receptor signaling pathway	Gene Ontology	GO:0035860	2	6	0.0329822	0.229361	GFRA4	SULF1	http://amigo.geneontology.org/amigo/term/GO:0035860
hepatocyte apoptotic process	Gene Ontology	GO:0097284	2	6	0.0329822	0.229361	RB1	KRT18	http://amigo.geneontology.org/amigo/term/GO:0097284
calcium channel inhibitor activity	Gene Ontology	GO:0019855	2	6	0.0329822	0.229361	ITPR1	PACSIN3	http://amigo.geneontology.org/amigo/term/GO:0019855
telomeric D-loop disassembly	Gene Ontology	GO:0061820	2	6	0.0329822	0.229361	WRN	POT1	http://amigo.geneontology.org/amigo/term/GO:0061820
microtubule minus-end	Gene Ontology	GO:0036449	2	6	0.0329822	0.229361	ASPM	NIN	http://amigo.geneontology.org/amigo/term/GO:0036449
blood circulation	Gene Ontology	GO:0008015	2	6	0.0329822	0.229361	F5	CHD7	http://amigo.geneontology.org/amigo/term/GO:0008015
leukotriene biosynthetic process	Gene Ontology	GO:0019370	2	6	0.0329822	0.229361	LTA4H	ALOX5AP	http://amigo.geneontology.org/amigo/term/GO:0019370
malate metabolic process	Gene Ontology	GO:0006108	2	6	0.0329822	0.229361	MDH2	MDH1	http://amigo.geneontology.org/amigo/term/GO:0006108
ciliary tip	Gene Ontology	GO:0097542	2	6	0.0329822	0.229361	ICK	ARMC9	http://amigo.geneontology.org/amigo/term/GO:0097542
transferrin receptor binding	Gene Ontology	GO:1990459	2	6	0.0329822	0.229361	CHUK	SNX4	http://amigo.geneontology.org/amigo/term/GO:1990459
blood vessel maturation	Gene Ontology	GO:0001955	2	6	0.0329822	0.229361	RECK	VEGFA	http://amigo.geneontology.org/amigo/term/GO:0001955
7S RNA binding	Gene Ontology	GO:0008312	2	6	0.0329822	0.229361	SRP72	SRP54	http://amigo.geneontology.org/amigo/term/GO:0008312
protein K6-linked ubiquitination	Gene Ontology	GO:0085020	2	6	0.0329822	0.229361	BRCA1	UBE2S	http://amigo.geneontology.org/amigo/term/GO:0085020
peroxisome proliferator activated receptor binding	Gene Ontology	GO:0042975	2	6	0.0329822	0.229361	ASXL2	HMGA1	http://amigo.geneontology.org/amigo/term/GO:0042975
long-chain fatty acid import into cell	Gene Ontology	GO:0044539	2	6	0.0329822	0.229361	SLC27A4	ACSL3	http://amigo.geneontology.org/amigo/term/GO:0044539
maintenance of centrosome location	Gene Ontology	GO:0051661	2	6	0.0329822	0.229361	ASPM	SPOUT1	http://amigo.geneontology.org/amigo/term/GO:0051661
SRP-dependent cotranslational protein targeting to membrane, translocation	Gene Ontology	GO:0006616	2	6	0.0329822	0.229361	SRP54	SEC61A2	http://amigo.geneontology.org/amigo/term/GO:0006616
regulation of glycolytic process	Gene Ontology	GO:0006110	2	6	0.0329822	0.229361	OGT	PRKAG2	http://amigo.geneontology.org/amigo/term/GO:0006110
protein localization to microtubule	Gene Ontology	GO:0035372	2	6	0.0329822	0.229361	MAPRE1	MAPRE2	http://amigo.geneontology.org/amigo/term/GO:0035372
macropinosome	Gene Ontology	GO:0044354	2	6	0.0329822	0.229361	APPL1	CLIP1	http://amigo.geneontology.org/amigo/term/GO:0044354
cysteine-type endopeptidase activator activity involved in apoptotic process	Gene Ontology	GO:0008656	2	6	0.0329822	0.229361	CASP8AP2	ATP2A3	http://amigo.geneontology.org/amigo/term/GO:0008656
stress fiber assembly	Gene Ontology	GO:0043149	2	6	0.0329822	0.229361	TNFAIP1	ITGB5	http://amigo.geneontology.org/amigo/term/GO:0043149
mitophagy	Gene Ontology	GO:0000423	2	6	0.0329822	0.229361	PHB2	AMBRA1	http://amigo.geneontology.org/amigo/term/GO:0000423
microtubule nucleation by interphase microtubule organizing center	Gene Ontology	GO:0051415	2	6	0.0329822	0.229361	MZT1	TUBGCP5	http://amigo.geneontology.org/amigo/term/GO:0051415
centriolar subdistal appendage	Gene Ontology	GO:0120103	2	6	0.0329822	0.229361	CNTRL	NIN	http://amigo.geneontology.org/amigo/term/GO:0120103
endodermal cell fate commitment	Gene Ontology	GO:0001711	2	6	0.0329822	0.229361	CTNNB1	CTR9	http://amigo.geneontology.org/amigo/term/GO:0001711
G-quadruplex DNA binding	Gene Ontology	GO:0051880	2	6	0.0329822	0.229361	WRN	DHX36	http://amigo.geneontology.org/amigo/term/GO:0051880
signal recognition particle, endoplasmic reticulum targeting	Gene Ontology	GO:0005786	2	6	0.0329822	0.229361	SRP72	SRP54	http://amigo.geneontology.org/amigo/term/GO:0005786
negative regulation of mRNA polyadenylation	Gene Ontology	GO:1900364	2	6	0.0329822	0.229361	CCNT1	CTR9	http://amigo.geneontology.org/amigo/term/GO:1900364
mitochondrial ribosome	Gene Ontology	GO:0005761	2	6	0.0329822	0.229361	MRPL40	MTG1	http://amigo.geneontology.org/amigo/term/GO:0005761
phospholipid biosynthetic process	Gene Ontology	GO:0008654	2	6	0.0329822	0.229361	ISYNA1	GPAT2	http://amigo.geneontology.org/amigo/term/GO:0008654
endocytic recycling	Gene Ontology	GO:0032456	4	30	0.0357603	0.245011	RAB11FIP3	DENND1B	EHD2	SNX4	http://amigo.geneontology.org/amigo/term/GO:0032456
nuclear chromatin	Gene Ontology	GO:0000790	11	149	0.0358285	0.245011	NASP	HSF2	CHAF1B	TIPIN	ASXL2	POGZ	PPARD	EZH2	NUCKS1	RELA	TAF5L	http://amigo.geneontology.org/amigo/term/GO:0000790
pancreas development	Gene Ontology	GO:0031016	3	17	0.0359514	0.245011	CTNNB1	HHEX	ILDR2	http://amigo.geneontology.org/amigo/term/GO:0031016
intraciliary transport particle B	Gene Ontology	GO:0030992	3	17	0.0359514	0.245011	CLUAP1	IFT80	IFT57	http://amigo.geneontology.org/amigo/term/GO:0030992
nucleosome binding	Gene Ontology	GO:0031491	3	17	0.0359514	0.245011	UBXN7	NAP1L4	SMARCA5	http://amigo.geneontology.org/amigo/term/GO:0031491
protein serine/threonine kinase activity	Gene Ontology	GO:0004674	14	207	0.0359517	0.245011	NEK6	ALPK1	SGK3	TBK1	PASK	PRPF4B	CHUK	ADCK1	LATS1	MTOR	MAPK11	PRKDC	STK38L	STK35	http://amigo.geneontology.org/amigo/term/GO:0004674
kinase binding	Gene Ontology	GO:0019900	5	45	0.036809	0.247386	PTPN22	TNS2	NIN	RB1	RASGRP3	http://amigo.geneontology.org/amigo/term/GO:0019900
guanyl-nucleotide exchange factor activity	Gene Ontology	GO:0005085	6	61	0.0372549	0.247386	MCF2	CCDC88C	EIF2B2	MCF2L	LAMTOR5	DOCK10	http://amigo.geneontology.org/amigo/term/GO:0005085
mitochondrial matrix	Gene Ontology	GO:0005759	7	78	0.0379073	0.247386	CLPX	LACTB2	HSPE1	PCCA	PRIMPOL	PITRM1	COQ5	http://amigo.geneontology.org/amigo/term/GO:0005759
transcription regulatory region sequence-specific DNA binding	Gene Ontology	GO:0000976	8	96	0.0390489	0.247386	IRF2	ZNF639	ARID5A	MTERF3	SP3	KLF11	SFPQ	IRF1	http://amigo.geneontology.org/amigo/term/GO:0000976
poly(U) RNA binding	Gene Ontology	GO:0008266	3	18	0.0408223	0.247386	DAZAP1	PNPT1	KHDRBS1	http://amigo.geneontology.org/amigo/term/GO:0008266
structural constituent of nuclear pore	Gene Ontology	GO:0017056	3	18	0.0408223	0.247386	NUP214	NUP98	NUP107	http://amigo.geneontology.org/amigo/term/GO:0017056
barbed-end actin filament capping	Gene Ontology	GO:0051016	3	18	0.0408223	0.247386	SVIL	FLII	SCIN	http://amigo.geneontology.org/amigo/term/GO:0051016
DNA replication origin binding	Gene Ontology	GO:0003688	3	18	0.0408223	0.247386	CDC45	MCM10	MCM2	http://amigo.geneontology.org/amigo/term/GO:0003688
clathrin-dependent endocytosis	Gene Ontology	GO:0072583	3	18	0.0408223	0.247386	SNAP91	HIP1	INPP5F	http://amigo.geneontology.org/amigo/term/GO:0072583
condensed nuclear chromosome	Gene Ontology	GO:0000794	3	18	0.0408223	0.247386	SUN2	NIFK	TOPBP1	http://amigo.geneontology.org/amigo/term/GO:0000794
cyclin-dependent protein serine/threonine kinase activity	Gene Ontology	GO:0004693	3	18	0.0408223	0.247386	CDK10	CDK5	CDKL2	http://amigo.geneontology.org/amigo/term/GO:0004693
bone resorption	Gene Ontology	GO:0045453	3	18	0.0408223	0.247386	CTNNB1	ACP5	NOX4	http://amigo.geneontology.org/amigo/term/GO:0045453
oxidoreductase activity	Gene Ontology	GO:0016491	8	97	0.0409602	0.247386	VAT1	NDOR1	SMOX	DHRS7	FASN	FDXR	SELENOF	F5	http://amigo.geneontology.org/amigo/term/GO:0016491
regulation of DNA-binding transcription factor activity	Gene Ontology	GO:0051090	2	7	0.0413822	0.247386	FANCA	FANCD2	http://amigo.geneontology.org/amigo/term/GO:0051090
fatty acid elongase activity	Gene Ontology	GO:0009922	2	7	0.0413822	0.247386	ELOVL5	ELOVL1	http://amigo.geneontology.org/amigo/term/GO:0009922
ether lipid biosynthetic process	Gene Ontology	GO:0008611	2	7	0.0413822	0.247386	FASN	PDCD2	http://amigo.geneontology.org/amigo/term/GO:0008611
negative regulation of receptor binding	Gene Ontology	GO:1900121	2	7	0.0413822	0.247386	RGMA	ATP2A3	http://amigo.geneontology.org/amigo/term/GO:1900121
SRP-dependent cotranslational protein targeting to membrane	Gene Ontology	GO:0006614	2	7	0.0413822	0.247386	SRP72	SRPRA	http://amigo.geneontology.org/amigo/term/GO:0006614
retinoid X receptor binding	Gene Ontology	GO:0046965	2	7	0.0413822	0.247386	ARID5A	HMGA1	http://amigo.geneontology.org/amigo/term/GO:0046965
regulation of cell division	Gene Ontology	GO:0051302	2	7	0.0413822	0.247386	DLL1	RBL1	http://amigo.geneontology.org/amigo/term/GO:0051302
fatty acid elongation, monounsaturated fatty acid	Gene Ontology	GO:0034625	2	7	0.0413822	0.247386	ELOVL5	ELOVL1	http://amigo.geneontology.org/amigo/term/GO:0034625
cyclin/CDK positive transcription elongation factor complex	Gene Ontology	GO:0008024	2	7	0.0413822	0.247386	CCNT1	RB1	http://amigo.geneontology.org/amigo/term/GO:0008024
positive regulation of type I interferon-mediated signaling pathway	Gene Ontology	GO:0060340	2	7	0.0413822	0.247386	LSM14A	TBK1	http://amigo.geneontology.org/amigo/term/GO:0060340
3-oxo-lignoceronyl-CoA synthase activity	Gene Ontology	GO:0102338	2	7	0.0413822	0.247386	ELOVL5	ELOVL1	http://amigo.geneontology.org/amigo/term/GO:0102338
cell-substrate adhesion	Gene Ontology	GO:0031589	2	7	0.0413822	0.247386	PPARD	VWF	http://amigo.geneontology.org/amigo/term/GO:0031589
protein localization to lysosome	Gene Ontology	GO:0061462	2	7	0.0413822	0.247386	RTN4	GGA3	http://amigo.geneontology.org/amigo/term/GO:0061462
positive regulation of fatty acid biosynthetic process	Gene Ontology	GO:0045723	2	7	0.0413822	0.247386	MLXIPL	ELOVL5	http://amigo.geneontology.org/amigo/term/GO:0045723
microtubule anchoring at centrosome	Gene Ontology	GO:0034454	2	7	0.0413822	0.247386	PCM1	NIN	http://amigo.geneontology.org/amigo/term/GO:0034454
negative regulation of fatty acid biosynthetic process	Gene Ontology	GO:0045717	2	7	0.0413822	0.247386	BRCA1	ERLIN2	http://amigo.geneontology.org/amigo/term/GO:0045717
fibroblast migration	Gene Ontology	GO:0010761	2	7	0.0413822	0.247386	SGPL1	TNS1	http://amigo.geneontology.org/amigo/term/GO:0010761
oxaloacetate metabolic process	Gene Ontology	GO:0006107	2	7	0.0413822	0.247386	ACLY	MDH1	http://amigo.geneontology.org/amigo/term/GO:0006107
mesodermal cell differentiation	Gene Ontology	GO:0048333	2	7	0.0413822	0.247386	ITGA8	ITGA3	http://amigo.geneontology.org/amigo/term/GO:0048333
peroxisomal matrix	Gene Ontology	GO:0005782	2	7	0.0413822	0.247386	IDE	AGXT	http://amigo.geneontology.org/amigo/term/GO:0005782
protein desumoylation	Gene Ontology	GO:0016926	2	7	0.0413822	0.247386	SENP6	SENP1	http://amigo.geneontology.org/amigo/term/GO:0016926
G-rich strand telomeric DNA binding	Gene Ontology	GO:0098505	2	7	0.0413822	0.247386	NABP2	POT1	http://amigo.geneontology.org/amigo/term/GO:0098505
negative regulation of tyrosine phosphorylation of STAT protein	Gene Ontology	GO:0042532	2	7	0.0413822	0.247386	SH2B3	INPP5F	http://amigo.geneontology.org/amigo/term/GO:0042532
fatty acid elongation, saturated fatty acid	Gene Ontology	GO:0019367	2	7	0.0413822	0.247386	ELOVL5	ELOVL1	http://amigo.geneontology.org/amigo/term/GO:0019367
negative regulation of protein kinase activity by regulation of protein phosphorylation	Gene Ontology	GO:0044387	2	7	0.0413822	0.247386	CORO1C	ADARB1	http://amigo.geneontology.org/amigo/term/GO:0044387
regulation of intracellular estrogen receptor signaling pathway	Gene Ontology	GO:0033146	2	7	0.0413822	0.247386	UFL1	LATS1	http://amigo.geneontology.org/amigo/term/GO:0033146
3-oxo-arachidoyl-CoA synthase activity	Gene Ontology	GO:0102336	2	7	0.0413822	0.247386	ELOVL5	ELOVL1	http://amigo.geneontology.org/amigo/term/GO:0102336
3-oxo-cerotoyl-CoA synthase activity	Gene Ontology	GO:0102337	2	7	0.0413822	0.247386	ELOVL5	ELOVL1	http://amigo.geneontology.org/amigo/term/GO:0102337
very-long-chain 3-ketoacyl-CoA synthase activity	Gene Ontology	GO:0102756	2	7	0.0413822	0.247386	ELOVL5	ELOVL1	http://amigo.geneontology.org/amigo/term/GO:0102756
fatty acid elongation, polyunsaturated fatty acid	Gene Ontology	GO:0034626	2	7	0.0413822	0.247386	ELOVL5	ELOVL1	http://amigo.geneontology.org/amigo/term/GO:0034626
arylsulfatase activity	Gene Ontology	GO:0004065	2	7	0.0413822	0.247386	ARSH	SULF1	http://amigo.geneontology.org/amigo/term/GO:0004065
nucleosome positioning	Gene Ontology	GO:0016584	2	7	0.0413822	0.247386	SMARCA5	RSF1	http://amigo.geneontology.org/amigo/term/GO:0016584
dipeptidase activity	Gene Ontology	GO:0016805	2	7	0.0413822	0.247386	SCRN2	CNDP2	http://amigo.geneontology.org/amigo/term/GO:0016805
quinone binding	Gene Ontology	GO:0048038	2	7	0.0413822	0.247386	NDUFS2	TP53I3	http://amigo.geneontology.org/amigo/term/GO:0048038
hydrolase activity, acting on ester bonds	Gene Ontology	GO:0016788	2	7	0.0413822	0.247386	FASN	TATDN3	http://amigo.geneontology.org/amigo/term/GO:0016788
positive regulation of mitotic cell cycle spindle assembly checkpoint	Gene Ontology	GO:0090267	2	7	0.0413822	0.247386	XRCC3	NDC80	http://amigo.geneontology.org/amigo/term/GO:0090267
carboxylic acid metabolic process	Gene Ontology	GO:0019752	2	7	0.0413822	0.247386	CSAD	LDHA	http://amigo.geneontology.org/amigo/term/GO:0019752
replication fork protection	Gene Ontology	GO:0048478	2	7	0.0413822	0.247386	DONSON	TIPIN	http://amigo.geneontology.org/amigo/term/GO:0048478
oxidoreductase activity, acting on single donors with incorporation of molecular oxygen, incorporation of two atoms of oxygen	Gene Ontology	GO:0016702	2	7	0.0413822	0.247386	P4HA2	P4HA1	http://amigo.geneontology.org/amigo/term/GO:0016702
protein localization to nucleolus	Gene Ontology	GO:1902570	2	7	0.0413822	0.247386	WRN	RPF2	http://amigo.geneontology.org/amigo/term/GO:1902570
post-mRNA release spliceosomal complex	Gene Ontology	GO:0071014	2	7	0.0413822	0.247386	CHUK	MYEF2	http://amigo.geneontology.org/amigo/term/GO:0071014
retinoic acid receptor binding	Gene Ontology	GO:0042974	2	7	0.0413822	0.247386	HMGA1	ACTN4	http://amigo.geneontology.org/amigo/term/GO:0042974
adherens junction	Gene Ontology	GO:0005912	7	80	0.0421784	0.25145	DLG5	MYH9	CTNNB1	DLL1	PKP4	MAGI1	TNS1	http://amigo.geneontology.org/amigo/term/GO:0005912
negative regulation of angiogenesis	Gene Ontology	GO:0016525	5	47	0.0425488	0.25145	CTNNB1	HHEX	STAB1	SULF1	ATF2	http://amigo.geneontology.org/amigo/term/GO:0016525
positive regulation of NIK/NF-kappaB signaling	Gene Ontology	GO:1901224	4	32	0.0428922	0.25145	RELA	RC3H2	IL18R1	ACTN4	http://amigo.geneontology.org/amigo/term/GO:1901224
4 iron, 4 sulfur cluster binding	Gene Ontology	GO:0051539	4	32	0.0428922	0.25145	NDUFS1	NUBPL	NFU1	LIAS	http://amigo.geneontology.org/amigo/term/GO:0051539
phosphatidylinositol-mediated signaling	Gene Ontology	GO:0048015	4	32	0.0428922	0.25145	OGT	PLCH1	INPP5F	PIK3CA	http://amigo.geneontology.org/amigo/term/GO:0048015
positive regulation of MAP kinase activity	Gene Ontology	GO:0043406	4	32	0.0428922	0.25145	ERBB2	EZH2	NOX4	PDE5A	http://amigo.geneontology.org/amigo/term/GO:0043406
promoter-specific chromatin binding	Gene Ontology	GO:1990841	4	32	0.0428922	0.25145	EZH2	RBL1	CHD7	NUP98	http://amigo.geneontology.org/amigo/term/GO:1990841
transmembrane transporter activity	Gene Ontology	GO:0022857	7	81	0.0444261	0.259883	SLC44A5	SLC17A9	ATP8A1	SLC35B1	SLC22A5	SFXN4	CNNM4	http://amigo.geneontology.org/amigo/term/GO:0022857
flavin adenine dinucleotide binding	Gene Ontology	GO:0050660	5	48	0.0456094	0.265665	ILVBL	FMO3	NDOR1	ACADS	DUS2	http://amigo.geneontology.org/amigo/term/GO:0050660
MAPK cascade	Gene Ontology	GO:0000165	5	48	0.0456094	0.265665	ICK	IL18	MAP4K3	MAP4K5	NLK	http://amigo.geneontology.org/amigo/term/GO:0000165
neuronal stem cell population maintenance	Gene Ontology	GO:0097150	3	19	0.0460073	0.266276	DLL1	FANCD2	ASPM	http://amigo.geneontology.org/amigo/term/GO:0097150
ribosomal large subunit assembly	Gene Ontology	GO:0000027	3	19	0.0460073	0.266276	RPF2	RPLP0	RSL24D1	http://amigo.geneontology.org/amigo/term/GO:0000027
positive regulation of viral genome replication	Gene Ontology	GO:0045070	3	19	0.0460073	0.266276	STAU1	DDB1	ADARB1	http://amigo.geneontology.org/amigo/term/GO:0045070
scaffold protein binding	Gene Ontology	GO:0097110	4	33	0.0467364	0.269352	DLL1	KRT18	CHUK	CDC37	http://amigo.geneontology.org/amigo/term/GO:0097110
positive regulation of catalytic activity	Gene Ontology	GO:0043085	4	33	0.0467364	0.269352	APH1A	ALOX5AP	CHUK	WRNIP1	http://amigo.geneontology.org/amigo/term/GO:0043085
calcium ion binding	Gene Ontology	GO:0005509	25	447	0.047008	0.270345	RASGRP3	STAB1	STAB2	SPTAN1	HSPG2	CLGN	DLK1	SNED1	TBC1D9	CLEC3B	SULF1	PLCH1	CAPN1	ANXA11	MATN1	ENPP2	DLL1	PLA2G2E	ITPR1	RAB11FIP3	NIN	ACTN4	EFCAB5	DLL4	SCIN	http://amigo.geneontology.org/amigo/term/GO:0005509
response to drug	Gene Ontology	GO:0042493	6	65	0.0473422	0.270368	SRP54	SOD1	CTNNB1	GRIN2A	SRP72	ABCC1	http://amigo.geneontology.org/amigo/term/GO:0042493
RNA polymerase II transcription regulatory region sequence-specific DNA binding	Gene Ontology	GO:0000977	13	197	0.0490793	0.270368	MGA	HHEX	RBL1	HNF4beta	ACTN4	TBX21	ASCL3	PARP1	RB1	NR2F2	TBX3	CREBRF	RELA	http://amigo.geneontology.org/amigo/term/GO:0000977
Z disc	Gene Ontology	GO:0030018	6	66	0.050103	0.270368	ACTN4	DNAJB6	CTNNB1	MYO18B	JPH1	FHL5	http://amigo.geneontology.org/amigo/term/GO:0030018
integral component of endoplasmic reticulum membrane	Gene Ontology	GO:0030176	6	66	0.050103	0.270368	SLC35B1	RTN4	SARAF	DOLPP1	ELOVL5	ELOVL1	http://amigo.geneontology.org/amigo/term/GO:0030176
early phagosome	Gene Ontology	GO:0032009	2	8	0.0504833	0.270368	APPL1	RAB5A	http://amigo.geneontology.org/amigo/term/GO:0032009
membrane organization	Gene Ontology	GO:0061024	2	8	0.0504833	0.270368	SAR1B	PDCD2	http://amigo.geneontology.org/amigo/term/GO:0061024
positive regulation of isotype switching to IgG isotypes	Gene Ontology	GO:0048304	2	8	0.0504833	0.270368	TBX21	PAXIP1	http://amigo.geneontology.org/amigo/term/GO:0048304
nuclear replication fork	Gene Ontology	GO:0043596	2	8	0.0504833	0.270368	SMARCAD1	SMARCA5	http://amigo.geneontology.org/amigo/term/GO:0043596
peptide disulfide oxidoreductase activity	Gene Ontology	GO:0015037	2	8	0.0504833	0.270368	PDIA6	TXNDC12	http://amigo.geneontology.org/amigo/term/GO:0015037
arachidonic acid metabolic process	Gene Ontology	GO:0019369	2	8	0.0504833	0.270368	DAGLA	PNPLA8	http://amigo.geneontology.org/amigo/term/GO:0019369
MLL3/4 complex	Gene Ontology	GO:0044666	2	8	0.0504833	0.270368	KMT2D	PAXIP1	http://amigo.geneontology.org/amigo/term/GO:0044666
positive regulation of histone deacetylation	Gene Ontology	GO:0031065	2	8	0.0504833	0.270368	CTBP1	ING2	http://amigo.geneontology.org/amigo/term/GO:0031065
negative regulation of protein sumoylation	Gene Ontology	GO:0033234	2	8	0.0504833	0.270368	CTNNB1	RELA	http://amigo.geneontology.org/amigo/term/GO:0033234
phosphatidylethanolamine binding	Gene Ontology	GO:0008429	2	8	0.0504833	0.270368	MAP1LC3A	ANXA11	http://amigo.geneontology.org/amigo/term/GO:0008429
positive regulation of DNA-templated transcription, elongation	Gene Ontology	GO:0032786	2	8	0.0504833	0.270368	CCNT1	THOC5	http://amigo.geneontology.org/amigo/term/GO:0032786
embryonic heart tube development	Gene Ontology	GO:0035050	2	8	0.0504833	0.270368	CTNNB1	HHEX	http://amigo.geneontology.org/amigo/term/GO:0035050
poly(G) binding	Gene Ontology	GO:0034046	2	8	0.0504833	0.270368	DAZAP1	PNPT1	http://amigo.geneontology.org/amigo/term/GO:0034046
clathrin light chain binding	Gene Ontology	GO:0032051	2	8	0.0504833	0.270368	CLTCL1	HIP1	http://amigo.geneontology.org/amigo/term/GO:0032051
ectoderm development	Gene Ontology	GO:0007398	2	8	0.0504833	0.270368	CTNNB1	ZBTB17	http://amigo.geneontology.org/amigo/term/GO:0007398
histone acetyltransferase activity (H4-K16 specific)	Gene Ontology	GO:0046972	2	8	0.0504833	0.270368	OGT	MSL3	http://amigo.geneontology.org/amigo/term/GO:0046972
pronucleus	Gene Ontology	GO:0045120	2	8	0.0504833	0.270368	CENPF	EZH2	http://amigo.geneontology.org/amigo/term/GO:0045120
negative regulation of axon regeneration	Gene Ontology	GO:0048681	2	8	0.0504833	0.270368	INPP5F	RGMA	http://amigo.geneontology.org/amigo/term/GO:0048681
double-strand break repair via break-induced replication	Gene Ontology	GO:0000727	2	8	0.0504833	0.270368	CDC45	MCM2	http://amigo.geneontology.org/amigo/term/GO:0000727
protein localization to chromosome, telomeric region	Gene Ontology	GO:0070198	2	8	0.0504833	0.270368	ATRX	TNKS2	http://amigo.geneontology.org/amigo/term/GO:0070198
nuclear origin of replication recognition complex	Gene Ontology	GO:0005664	2	8	0.0504833	0.270368	ORC6	MCM2	http://amigo.geneontology.org/amigo/term/GO:0005664
negative regulation of intracellular estrogen receptor signaling pathway	Gene Ontology	GO:0033147	2	8	0.0504833	0.270368	PHB2	BRCA1	http://amigo.geneontology.org/amigo/term/GO:0033147
regulation of chondrocyte differentiation	Gene Ontology	GO:0032330	2	8	0.0504833	0.270368	GLG1	SCIN	http://amigo.geneontology.org/amigo/term/GO:0032330
long-chain fatty-acyl-CoA biosynthetic process	Gene Ontology	GO:0035338	2	8	0.0504833	0.270368	ELOVL5	ELOVL1	http://amigo.geneontology.org/amigo/term/GO:0035338
branching involved in salivary gland morphogenesis	Gene Ontology	GO:0060445	2	8	0.0504833	0.270368	LAMA1	TGM2	http://amigo.geneontology.org/amigo/term/GO:0060445
histone H2A monoubiquitination	Gene Ontology	GO:0035518	2	8	0.0504833	0.270368	DDB1	UBXN7	http://amigo.geneontology.org/amigo/term/GO:0035518
cGMP binding	Gene Ontology	GO:0030553	2	8	0.0504833	0.270368	PDE5A	PRKG2	http://amigo.geneontology.org/amigo/term/GO:0030553
positive regulation of endothelial cell differentiation	Gene Ontology	GO:0045603	2	8	0.0504833	0.270368	CTNNB1	ATOH8	http://amigo.geneontology.org/amigo/term/GO:0045603
ciliary transition fiber	Gene Ontology	GO:0097539	2	8	0.0504833	0.270368	CENPF	NIN	http://amigo.geneontology.org/amigo/term/GO:0097539
translesion synthesis	Gene Ontology	GO:0019985	2	8	0.0504833	0.270368	MAD2L2	PRIMPOL	http://amigo.geneontology.org/amigo/term/GO:0019985
5S rRNA binding	Gene Ontology	GO:0008097	2	8	0.0504833	0.270368	MRPL18	RPF2	http://amigo.geneontology.org/amigo/term/GO:0008097
negative regulation of epithelial cell proliferation	Gene Ontology	GO:0050680	4	34	0.0507655	0.271023	PPARD	IFT80	IFT57	RB1	http://amigo.geneontology.org/amigo/term/GO:0050680
embryonic skeletal system development	Gene Ontology	GO:0048706	3	20	0.0515004	0.271023	SP3	MBTD1	SULF1	http://amigo.geneontology.org/amigo/term/GO:0048706
response to estrogen	Gene Ontology	GO:0043627	3	20	0.0515004	0.271023	BRCA1	SLC34A2	KMT2D	http://amigo.geneontology.org/amigo/term/GO:0043627
negative regulation of G1/S transition of mitotic cell cycle	Gene Ontology	GO:2000134	3	20	0.0515004	0.271023	EZH2	RBL1	RB1	http://amigo.geneontology.org/amigo/term/GO:2000134
Rho GTPase binding	Gene Ontology	GO:0017048	3	20	0.0515004	0.271023	FMNL2	STRIP1	DIAPH3	http://amigo.geneontology.org/amigo/term/GO:0017048
negative regulation of endothelial cell proliferation	Gene Ontology	GO:0001937	3	20	0.0515004	0.271023	NR2F2	SULF1	ATOH8	http://amigo.geneontology.org/amigo/term/GO:0001937
response to hydrogen peroxide	Gene Ontology	GO:0042542	3	20	0.0515004	0.271023	ADAM9	GLRX2	SOD1	http://amigo.geneontology.org/amigo/term/GO:0042542
NF-kappaB binding	Gene Ontology	GO:0051059	3	20	0.0515004	0.271023	NPM1	RELA	COMMD6	http://amigo.geneontology.org/amigo/term/GO:0051059
GTPase binding	Gene Ontology	GO:0051020	3	20	0.0515004	0.271023	RRAGD	AMBRA1	GOLGA4	http://amigo.geneontology.org/amigo/term/GO:0051020
protein phosphatase binding	Gene Ontology	GO:0019903	5	50	0.0521142	0.272745	ERBB2	CTNNB1	MTMR4	HSP90B1	TBK1	http://amigo.geneontology.org/amigo/term/GO:0019903
positive regulation of DNA-binding transcription factor activity	Gene Ontology	GO:0051091	5	50	0.0521142	0.272745	PHB2	CTNNB1	ATF2	LRP6	COPS5	http://amigo.geneontology.org/amigo/term/GO:0051091
ubiquitin-dependent protein catabolic process	Gene Ontology	GO:0006511	12	179	0.0521277	0.272745	HERPUD1	UBXN7	WWP2	FBXL5	USP40	CUL1	USP16	UBE2S	USP20	TRIP12	RNF213	TRPC4AP	http://amigo.geneontology.org/amigo/term/GO:0006511
actin binding	Gene Ontology	GO:0003779	10	140	0.0522639	0.272933	EPB41L1	MYH11	DIAPH3	SPTAN1	ACTN4	GMFB	MYO18B	UTRN	PARVB	TNS1	http://amigo.geneontology.org/amigo/term/GO:0003779
cellular response to leukemia inhibitory factor	Gene Ontology	GO:1990830	7	85	0.0541785	0.282391	BSPRY	RPS16	LAPTM5	MCF2	MRAS	HK2	SMARCA5	http://amigo.geneontology.org/amigo/term/GO:1990830
ATPase-coupled transmembrane transporter activity	Gene Ontology	GO:0042626	4	35	0.0549786	0.282777	ABCD2	ABCB8	ABCA2	ABCC1	http://amigo.geneontology.org/amigo/term/GO:0042626
negative regulation of NF-kappaB transcription factor activity	Gene Ontology	GO:0032088	4	35	0.0549786	0.282777	UFL1	COMMD6	CHUK	NLRC3	http://amigo.geneontology.org/amigo/term/GO:0032088
heat shock protein binding	Gene Ontology	GO:0031072	4	35	0.0549786	0.282777	DNAJA2	METTL22	DNAJB6	CDC37	http://amigo.geneontology.org/amigo/term/GO:0031072
chromatin organization	Gene Ontology	GO:0006325	4	35	0.0549786	0.282777	RELA	CHD7	ING2	RB1	http://amigo.geneontology.org/amigo/term/GO:0006325
blood coagulation	Gene Ontology	GO:0007596	4	35	0.0549786	0.282777	IFNAR2	BLOC1S6	SERPINA10	F5	http://amigo.geneontology.org/amigo/term/GO:0007596
double-strand break repair	Gene Ontology	GO:0006302	4	35	0.0549786	0.282777	UBXN7	PRKDC	PARP1	PARP3	http://amigo.geneontology.org/amigo/term/GO:0006302
DNA-binding transcription repressor activity, RNA polymerase II-specific	Gene Ontology	GO:0001227	11	161	0.0552075	0.283045	TCF7	HHEX	ARID5A	TBX3	TBX21	ASCL3	HESX1	SP3	MLXIPL	PPARD	RELA	http://amigo.geneontology.org/amigo/term/GO:0001227
phosphatidylinositol-4,5-bisphosphate binding	Gene Ontology	GO:0005546	5	51	0.055559	0.283045	SNAP91	SVIL	SYTL2	FLII	SCIN	http://amigo.geneontology.org/amigo/term/GO:0005546
apoptotic process	Gene Ontology	GO:0006915	8	104	0.056081	0.283045	IRF1	IFT57	TRAF7	OGT	PARP1	RB1	MCM2	CUL1	http://amigo.geneontology.org/amigo/term/GO:0006915
cellular response to DNA damage stimulus	Gene Ontology	GO:0006974	9	123	0.056593	0.283045	UFL1	MCM10	APBB1	PRKDC	BCCIP	USP16	TRIP12	SHPRH	ATF2	http://amigo.geneontology.org/amigo/term/GO:0006974
mitochondrial inner membrane	Gene Ontology	GO:0005743	7	86	0.0568094	0.283045	ADCK1	BCS1L	YME1L1	PHB2	MTG1	MRS2	SLC25A14	http://amigo.geneontology.org/amigo/term/GO:0005743
nuclear pore	Gene Ontology	GO:0005643	3	21	0.0572946	0.283045	NUP214	NUP210	XPO7	http://amigo.geneontology.org/amigo/term/GO:0005643
spindle assembly	Gene Ontology	GO:0051225	3	21	0.0572946	0.283045	MAPRE1	TUBGCP5	MAPRE2	http://amigo.geneontology.org/amigo/term/GO:0051225
negative regulation of Notch signaling pathway	Gene Ontology	GO:0045746	3	21	0.0572946	0.283045	DLL1	DLL4	DLK1	http://amigo.geneontology.org/amigo/term/GO:0045746
replication fork	Gene Ontology	GO:0005657	3	21	0.0572946	0.283045	WRN	XRCC3	PRIMPOL	http://amigo.geneontology.org/amigo/term/GO:0005657
carbohydrate phosphorylation	Gene Ontology	GO:0046835	3	21	0.0572946	0.283045	HK2	TKFC	GALK2	http://amigo.geneontology.org/amigo/term/GO:0046835
fatty acid biosynthetic process	Gene Ontology	GO:0006633	3	21	0.0572946	0.283045	ACLY	FASN	OXSM	http://amigo.geneontology.org/amigo/term/GO:0006633
methyltransferase activity	Gene Ontology	GO:0008168	3	21	0.0572946	0.283045	COQ5	NDUFAF5	METTL4	http://amigo.geneontology.org/amigo/term/GO:0008168
T cell differentiation in thymus	Gene Ontology	GO:0033077	3	21	0.0572946	0.283045	CTNNB1	PRKDC	PRR7	http://amigo.geneontology.org/amigo/term/GO:0033077
maturation of SSU-rRNA from tricistronic rRNA transcript (SSU-rRNA, 5.8S rRNA, LSU-rRNA)	Gene Ontology	GO:0000462	3	21	0.0572946	0.283045	DIEXF	RPS16	DHX37	http://amigo.geneontology.org/amigo/term/GO:0000462
regulation of actin filament polymerization	Gene Ontology	GO:0030833	3	21	0.0572946	0.283045	LATS1	ARHGAP28	FAM49A	http://amigo.geneontology.org/amigo/term/GO:0030833
regulation of apoptotic process	Gene Ontology	GO:0042981	5	52	0.059132	0.283045	BCL2L15	WRN	NLRC3	RASSF5	NME3	http://amigo.geneontology.org/amigo/term/GO:0042981
positive regulation of protein kinase B signaling	Gene Ontology	GO:0051897	5	52	0.059132	0.283045	IL18	RTN4	NOX4	BAG4	GCNT2	http://amigo.geneontology.org/amigo/term/GO:0051897
cell-matrix adhesion	Gene Ontology	GO:0007160	5	52	0.059132	0.283045	SNED1	CTNNB1	ITGA8	ITGB5	ADAM9	http://amigo.geneontology.org/amigo/term/GO:0007160
integrin-mediated signaling pathway	Gene Ontology	GO:0007229	5	52	0.059132	0.283045	ITGA8	PTPN11	ITGA3	ITGB5	FUT8	http://amigo.geneontology.org/amigo/term/GO:0007229
cytosolic small ribosomal subunit	Gene Ontology	GO:0022627	4	36	0.0593745	0.283045	EIF2A	RPS16	RPS15A	FAU	http://amigo.geneontology.org/amigo/term/GO:0022627
filopodium membrane	Gene Ontology	GO:0031527	2	9	0.0602224	0.283045	UTRN	ITGA3	http://amigo.geneontology.org/amigo/term/GO:0031527
cellular response to leucine starvation	Gene Ontology	GO:1990253	2	9	0.0602224	0.283045	RRAGD	MTOR	http://amigo.geneontology.org/amigo/term/GO:1990253
regulation of transcription involved in G1/S transition of mitotic cell cycle	Gene Ontology	GO:0000083	2	9	0.0602224	0.283045	KLF11	CDK5	http://amigo.geneontology.org/amigo/term/GO:0000083
extrinsic component of mitochondrial inner membrane	Gene Ontology	GO:0031314	2	9	0.0602224	0.283045	COQ5	NDUFAF5	http://amigo.geneontology.org/amigo/term/GO:0031314
DNA-(apurinic or apyrimidinic site) endonuclease activity	Gene Ontology	GO:0003906	2	9	0.0602224	0.283045	NEIL3	HMGA1	http://amigo.geneontology.org/amigo/term/GO:0003906
negative regulation of substrate adhesion-dependent cell spreading	Gene Ontology	GO:1900025	2	9	0.0602224	0.283045	CORO1C	ACTN4	http://amigo.geneontology.org/amigo/term/GO:1900025
positive regulation of lipid biosynthetic process	Gene Ontology	GO:0046889	2	9	0.0602224	0.283045	CCDC3	MTOR	http://amigo.geneontology.org/amigo/term/GO:0046889
cellular response to leucine	Gene Ontology	GO:0071233	2	9	0.0602224	0.283045	RRAGD	MTOR	http://amigo.geneontology.org/amigo/term/GO:0071233
DNA clamp loader activity	Gene Ontology	GO:0003689	2	9	0.0602224	0.283045	RFC1	CHTF18	http://amigo.geneontology.org/amigo/term/GO:0003689
RNA stem-loop binding	Gene Ontology	GO:0035613	2	9	0.0602224	0.283045	DAZAP1	RC3H2	http://amigo.geneontology.org/amigo/term/GO:0035613
NIK/NF-kappaB signaling	Gene Ontology	GO:0038061	2	9	0.0602224	0.283045	RELA	CHUK	http://amigo.geneontology.org/amigo/term/GO:0038061
mitotic DNA replication checkpoint	Gene Ontology	GO:0033314	2	9	0.0602224	0.283045	NAE1	TOPBP1	http://amigo.geneontology.org/amigo/term/GO:0033314
regulation of cell adhesion mediated by integrin	Gene Ontology	GO:0033628	2	9	0.0602224	0.283045	LPXN	PLAU	http://amigo.geneontology.org/amigo/term/GO:0033628
protein quality control for misfolded or incompletely synthesized proteins	Gene Ontology	GO:0006515	2	9	0.0602224	0.283045	NGLY1	YME1L1	http://amigo.geneontology.org/amigo/term/GO:0006515
mitochondrial transport	Gene Ontology	GO:0006839	2	9	0.0602224	0.283045	SLC25A14	SLC25A30	http://amigo.geneontology.org/amigo/term/GO:0006839
nuclear export signal receptor activity	Gene Ontology	GO:0005049	2	9	0.0602224	0.283045	NUP214	XPO7	http://amigo.geneontology.org/amigo/term/GO:0005049
cardiac muscle hypertrophy in response to stress	Gene Ontology	GO:0014898	2	9	0.0602224	0.283045	EZH2	INPP5F	http://amigo.geneontology.org/amigo/term/GO:0014898
peroxisome organization	Gene Ontology	GO:0007031	2	9	0.0602224	0.283045	ABCD2	PEX6	http://amigo.geneontology.org/amigo/term/GO:0007031
unsaturated fatty acid biosynthetic process	Gene Ontology	GO:0006636	2	9	0.0602224	0.283045	ELOVL5	ELOVL1	http://amigo.geneontology.org/amigo/term/GO:0006636
clathrin-coated endocytic vesicle	Gene Ontology	GO:0045334	2	9	0.0602224	0.283045	CLTCL1	INPP5F	http://amigo.geneontology.org/amigo/term/GO:0045334
forebrain morphogenesis	Gene Ontology	GO:0048853	2	9	0.0602224	0.283045	HESX1	HHEX	http://amigo.geneontology.org/amigo/term/GO:0048853
SREBP signaling pathway	Gene Ontology	GO:0032933	2	9	0.0602224	0.283045	ERLIN2	EIF2A	http://amigo.geneontology.org/amigo/term/GO:0032933
response to ethanol	Gene Ontology	GO:0045471	2	9	0.0602224	0.283045	GRIN2A	SOD1	http://amigo.geneontology.org/amigo/term/GO:0045471
metaphase plate congression	Gene Ontology	GO:0051310	2	9	0.0602224	0.283045	CENPF	NDC80	http://amigo.geneontology.org/amigo/term/GO:0051310
long-chain fatty acid transporter activity	Gene Ontology	GO:0005324	2	9	0.0602224	0.283045	SLC27A4	ABCD2	http://amigo.geneontology.org/amigo/term/GO:0005324
RNA methyltransferase activity	Gene Ontology	GO:0008173	2	9	0.0602224	0.283045	TRMT2A	METTL4	http://amigo.geneontology.org/amigo/term/GO:0008173
protein transmembrane transporter activity	Gene Ontology	GO:0008320	2	9	0.0602224	0.283045	TOMM20	SEC61A2	http://amigo.geneontology.org/amigo/term/GO:0008320
negative regulation of endocytosis	Gene Ontology	GO:0045806	2	9	0.0602224	0.283045	PACSIN3	LRSAM1	http://amigo.geneontology.org/amigo/term/GO:0045806
regulation of BMP signaling pathway	Gene Ontology	GO:0030510	2	9	0.0602224	0.283045	ITGA3	RGMA	http://amigo.geneontology.org/amigo/term/GO:0030510
ESCRT I complex	Gene Ontology	GO:0000813	2	9	0.0602224	0.283045	VPS37C	VPS37A	http://amigo.geneontology.org/amigo/term/GO:0000813
spermatogenesis	Gene Ontology	GO:0007283	9	125	0.0610812	0.286095	DAZAP1	SGPL1	HSF2	SOD1	ASPM	INPP5B	NAIF1	ATRX	MOV10L1	http://amigo.geneontology.org/amigo/term/GO:0007283
negative regulation of inflammatory response	Gene Ontology	GO:0050728	5	53	0.062833	0.292848	ACP5	PPARD	NLRC3	RB1	SOD1	http://amigo.geneontology.org/amigo/term/GO:0050728
regulation of transcription, DNA-templated	Gene Ontology	GO:0006355	14	226	0.0631382	0.292848	HMGA1	NUP107	ZNF236	PASK	ZNF687	APBB1	POGZ	SFPQ	CTR9	TCEA3	ZNF407	ZNF767	TAF5L	NLK	http://amigo.geneontology.org/amigo/term/GO:0006355
positive regulation of epithelial cell migration	Gene Ontology	GO:0010634	3	22	0.0633824	0.292848	RTN4	ENPP2	CLASP1	http://amigo.geneontology.org/amigo/term/GO:0010634
acetylglucosaminyltransferase activity	Gene Ontology	GO:0008375	3	22	0.0633824	0.292848	LFNG	MGAT4A	EXT2	http://amigo.geneontology.org/amigo/term/GO:0008375
cellular response to epidermal growth factor stimulus	Gene Ontology	GO:0071364	3	22	0.0633824	0.292848	ERBB2	PTPN11	BAG4	http://amigo.geneontology.org/amigo/term/GO:0071364
immunological synapse	Gene Ontology	GO:0001772	3	22	0.0633824	0.292848	ALCAM	MYH9	NPTN	http://amigo.geneontology.org/amigo/term/GO:0001772
positive regulation of cell adhesion	Gene Ontology	GO:0045785	3	22	0.0633824	0.292848	ERBB2	TGM2	BAG4	http://amigo.geneontology.org/amigo/term/GO:0045785
translation	Gene Ontology	GO:0006412	8	107	0.0635185	0.29298	MRPL10	MRPL37	RPS16	MRPL18	MRPS5	RPS15A	FAU	RSL24D1	http://amigo.geneontology.org/amigo/term/GO:0006412
tubulin binding	Gene Ontology	GO:0015631	4	37	0.0639515	0.293983	STMN1	BCCIP	TTLL9	PRUNE1	http://amigo.geneontology.org/amigo/term/GO:0015631
protein destabilization	Gene Ontology	GO:0031648	4	37	0.0639515	0.293983	DIEXF	GGA3	CCDC88C	PRKDC	http://amigo.geneontology.org/amigo/term/GO:0031648
endomembrane system	Gene Ontology	GO:0012505	6	71	0.0653639	0.29997	STX8	RAB5A	PGRMC1	LRPAP1	RAB18	RAB24	http://amigo.geneontology.org/amigo/term/GO:0012505
cilium assembly	Gene Ontology	GO:0060271	9	127	0.0657906	0.300566	CLUAP1	ICK	CCDC66	EHD2	IFT80	NUDCD3	PCM1	ARMC9	CFAP70	http://amigo.geneontology.org/amigo/term/GO:0060271
T cell receptor signaling pathway	Gene Ontology	GO:0050852	5	54	0.0666616	0.300566	PTPN22	DENND1B	RC3H2	KHDRBS1	LCP2	http://amigo.geneontology.org/amigo/term/GO:0050852
translation initiation factor activity	Gene Ontology	GO:0003743	4	38	0.0687078	0.300566	EIF4G3	EIF4G1	EIF2B2	EIF2A	http://amigo.geneontology.org/amigo/term/GO:0003743
integrin binding	Gene Ontology	GO:0005178	6	72	0.0687085	0.300566	ITGB5	LGALS8	MYH9	ADAM9	UTRN	VWF	http://amigo.geneontology.org/amigo/term/GO:0005178
dendrite	Gene Ontology	GO:0030425	11	168	0.0692413	0.300566	STAU1	NIN	IGSF9	INPP5F	ALCAM	RPLP0	TMEM266	ELOVL5	MTOR	RAB5A	PPP1R9B	http://amigo.geneontology.org/amigo/term/GO:0030425
ADP binding	Gene Ontology	GO:0043531	3	23	0.0697554	0.300566	MYH11	MYH9	PRKAG2	http://amigo.geneontology.org/amigo/term/GO:0043531
RNA polymerase II complex binding	Gene Ontology	GO:0000993	3	23	0.0697554	0.300566	GTF2E1	CTR9	URI1	http://amigo.geneontology.org/amigo/term/GO:0000993
positive regulation of interferon-gamma production	Gene Ontology	GO:0032729	3	23	0.0697554	0.300566	IL18	PTPN22	IL18R1	http://amigo.geneontology.org/amigo/term/GO:0032729
negative regulation of tumor necrosis factor production	Gene Ontology	GO:0032720	3	23	0.0697554	0.300566	PTPN22	ACP5	NLRC3	http://amigo.geneontology.org/amigo/term/GO:0032720
activating transcription factor binding	Gene Ontology	GO:0033613	3	23	0.0697554	0.300566	NEK6	RELA	ATOH8	http://amigo.geneontology.org/amigo/term/GO:0033613
cAMP response element binding	Gene Ontology	GO:0035497	2	10	0.0705399	0.300566	CREB3L2	ATF2	http://amigo.geneontology.org/amigo/term/GO:0035497
presynaptic active zone cytoplasmic component	Gene Ontology	GO:0098831	2	10	0.0705399	0.300566	CTNNB1	CTBP1	http://amigo.geneontology.org/amigo/term/GO:0098831
peptidyl-proline hydroxylation to 4-hydroxy-L-proline	Gene Ontology	GO:0018401	2	10	0.0705399	0.300566	P4HA2	P4HA1	http://amigo.geneontology.org/amigo/term/GO:0018401
spinal cord development	Gene Ontology	GO:0021510	2	10	0.0705399	0.300566	DLL1	MED12	http://amigo.geneontology.org/amigo/term/GO:0021510
vasoconstriction	Gene Ontology	GO:0042310	2	10	0.0705399	0.300566	EDNRB	AGT	http://amigo.geneontology.org/amigo/term/GO:0042310
positive regulation of exosomal secretion	Gene Ontology	GO:1903543	2	10	0.0705399	0.300566	STAM	SDC4	http://amigo.geneontology.org/amigo/term/GO:1903543
costamere	Gene Ontology	GO:0043034	2	10	0.0705399	0.300566	SPTAN1	SVIL	http://amigo.geneontology.org/amigo/term/GO:0043034
negative regulation of endoplasmic reticulum stress-induced intrinsic apoptotic signaling pathway	Gene Ontology	GO:1902236	2	10	0.0705399	0.300566	HERPUD1	TXNDC12	http://amigo.geneontology.org/amigo/term/GO:1902236
regulation of release of sequestered calcium ion into cytosol	Gene Ontology	GO:0051279	2	10	0.0705399	0.300566	BANK1	CYBA	http://amigo.geneontology.org/amigo/term/GO:0051279
regulation of cellular senescence	Gene Ontology	GO:2000772	2	10	0.0705399	0.300566	PNPT1	ING2	http://amigo.geneontology.org/amigo/term/GO:2000772
immune system process	Gene Ontology	GO:0002376	2	10	0.0705399	0.300566	IRF2	IRF1	http://amigo.geneontology.org/amigo/term/GO:0002376
mitotic sister chromatid cohesion	Gene Ontology	GO:0007064	2	10	0.0705399	0.300566	POGZ	PTTG2	http://amigo.geneontology.org/amigo/term/GO:0007064
epithelial cell-cell adhesion	Gene Ontology	GO:0090136	2	10	0.0705399	0.300566	ITGB5	KIFC3	http://amigo.geneontology.org/amigo/term/GO:0090136
kinetochore assembly	Gene Ontology	GO:0051382	2	10	0.0705399	0.300566	POGZ	CENPN	http://amigo.geneontology.org/amigo/term/GO:0051382
seminiferous tubule development	Gene Ontology	GO:0072520	2	10	0.0705399	0.300566	ATRX	ING2	http://amigo.geneontology.org/amigo/term/GO:0072520
regulation of protein kinase activity	Gene Ontology	GO:0045859	2	10	0.0705399	0.300566	MTOR	CDC37	http://amigo.geneontology.org/amigo/term/GO:0045859
positive regulation by host of viral transcription	Gene Ontology	GO:0043923	2	10	0.0705399	0.300566	ZNF639	NUCKS1	http://amigo.geneontology.org/amigo/term/GO:0043923
interleukin-1-mediated signaling pathway	Gene Ontology	GO:0070498	2	10	0.0705399	0.300566	RELA	IL1R1	http://amigo.geneontology.org/amigo/term/GO:0070498
zinc ion transmembrane transport	Gene Ontology	GO:0071577	2	10	0.0705399	0.300566	SLC39A13	SLC39A3	http://amigo.geneontology.org/amigo/term/GO:0071577
oxidoreductase activity, acting on paired donors, with incorporation or reduction of molecular oxygen	Gene Ontology	GO:0016705	2	10	0.0705399	0.300566	CYP4B7	OGFOD2	http://amigo.geneontology.org/amigo/term/GO:0016705
positive regulation of histone acetylation	Gene Ontology	GO:0035066	2	10	0.0705399	0.300566	BRCA1	PAXIP1	http://amigo.geneontology.org/amigo/term/GO:0035066
blood vessel morphogenesis	Gene Ontology	GO:0048514	2	10	0.0705399	0.300566	LAMA1	NR2F2	http://amigo.geneontology.org/amigo/term/GO:0048514
positive regulation of endocytosis	Gene Ontology	GO:0045807	2	10	0.0705399	0.300566	DLL1	FLOT1	http://amigo.geneontology.org/amigo/term/GO:0045807
N-acyltransferase activity	Gene Ontology	GO:0016410	2	10	0.0705399	0.300566	BAAT	CERS2	http://amigo.geneontology.org/amigo/term/GO:0016410
positive regulation of cell cycle G1/S phase transition	Gene Ontology	GO:1902808	2	10	0.0705399	0.300566	PHB2	EZH2	http://amigo.geneontology.org/amigo/term/GO:1902808
npBAF complex	Gene Ontology	GO:0071564	2	10	0.0705399	0.300566	SMARCC2	SMARCC1	http://amigo.geneontology.org/amigo/term/GO:0071564
ceramide metabolic process	Gene Ontology	GO:0006672	2	10	0.0705399	0.300566	SGPL1	ORMDL1	http://amigo.geneontology.org/amigo/term/GO:0006672
positive regulation of telomere capping	Gene Ontology	GO:1904355	2	10	0.0705399	0.300566	TNKS2	NABP2	http://amigo.geneontology.org/amigo/term/GO:1904355
synaptic vesicle transport	Gene Ontology	GO:0048489	2	10	0.0705399	0.300566	CTNNB1	CDK5	http://amigo.geneontology.org/amigo/term/GO:0048489
NADPH oxidase complex	Gene Ontology	GO:0043020	2	10	0.0705399	0.300566	CYBA	NOX4	http://amigo.geneontology.org/amigo/term/GO:0043020
positive regulation of exocytosis	Gene Ontology	GO:0045921	2	10	0.0705399	0.300566	RAB5A	CLASP1	http://amigo.geneontology.org/amigo/term/GO:0045921
cullin-RING ubiquitin ligase complex	Gene Ontology	GO:0031461	2	10	0.0705399	0.300566	DDB1	CUL1	http://amigo.geneontology.org/amigo/term/GO:0031461
RNA polymerase II, core complex	Gene Ontology	GO:0005665	2	10	0.0705399	0.300566	POLR2H	POLR2B	http://amigo.geneontology.org/amigo/term/GO:0005665
post-embryonic development	Gene Ontology	GO:0009791	5	55	0.0706172	0.300566	RC3H2	SGPL1	ITPR1	MTOR	INPPL1	http://amigo.geneontology.org/amigo/term/GO:0009791
microtubule	Gene Ontology	GO:0005874	9	129	0.0707227	0.300566	CCDC66	STMN1	DYNC1I2	KIFC3	DYNC1LI2	TUBD1	MAPRE1	TUBGCP5	MAPRE2	http://amigo.geneontology.org/amigo/term/GO:0005874
phosphorylation	Gene Ontology	GO:0016310	6	73	0.0721505	0.305882	AGK	CKB	UCKL1	NMRK2	PPIP5K1	NOL9	http://amigo.geneontology.org/amigo/term/GO:0016310
RNA polymerase II transcription factor binding	Gene Ontology	GO:0001085	4	39	0.073641	0.310751	SPEN	TBX3	CTNNB1	WWP2	http://amigo.geneontology.org/amigo/term/GO:0001085
recycling endosome membrane	Gene Ontology	GO:0055038	4	39	0.073641	0.310751	RAB11FIP3	RAB12	EHD2	PLEKHB2	http://amigo.geneontology.org/amigo/term/GO:0055038
chromatin remodeling	Gene Ontology	GO:0006338	5	56	0.0746991	0.314729	RSF1	ATRX	NPM1	NUDT5	CHD7	http://amigo.geneontology.org/amigo/term/GO:0006338
protein binding	Gene Ontology	GO:0005515	9	131	0.0758788	0.316534	MYH11	STMN1	SOD1	SH3KBP1	CHAF1B	TNS1	PRKDC	NDC80	NCAM1	http://amigo.geneontology.org/amigo/term/GO:0005515
cell migration	Gene Ontology	GO:0016477	10	151	0.0762777	0.316534	ITGB5	TNFAIP1	FMNL2	PIK3CA	SDC4	CORO1C	CORO7	MAPRE1	SH3KBP1	FUT8	http://amigo.geneontology.org/amigo/term/GO:0016477
mRNA export from nucleus	Gene Ontology	GO:0006406	3	24	0.0764047	0.316534	NUP214	THOC5	NUP107	http://amigo.geneontology.org/amigo/term/GO:0006406
base-excision repair	Gene Ontology	GO:0006284	3	24	0.0764047	0.316534	WRN	NEIL3	HMGA1	http://amigo.geneontology.org/amigo/term/GO:0006284
histone deacetylation	Gene Ontology	GO:0016575	3	24	0.0764047	0.316534	HDAC11	MSL3	RBM14	http://amigo.geneontology.org/amigo/term/GO:0016575
NAD+ ADP-ribosyltransferase activity	Gene Ontology	GO:0003950	3	24	0.0764047	0.316534	TNKS2	PARP1	PARP3	http://amigo.geneontology.org/amigo/term/GO:0003950
amino acid transmembrane transport	Gene Ontology	GO:0003333	3	24	0.0764047	0.316534	SLC36A4	SLC6A9	SLC38A6	http://amigo.geneontology.org/amigo/term/GO:0003333
Golgi to plasma membrane protein transport	Gene Ontology	GO:0043001	3	24	0.0764047	0.316534	GGA3	OPTN	GOLGA4	http://amigo.geneontology.org/amigo/term/GO:0043001
spindle microtubule	Gene Ontology	GO:0005876	3	24	0.0764047	0.316534	KIF11	CLASP1	CLASP2	http://amigo.geneontology.org/amigo/term/GO:0005876
negative regulation of cell adhesion	Gene Ontology	GO:0007162	3	24	0.0764047	0.316534	PLXNB2	LPXN	DACT2	http://amigo.geneontology.org/amigo/term/GO:0007162
cell projection	Gene Ontology	GO:0042995	4	40	0.0787486	0.319656	RTN4	C1QTNF5	MAGI1	SCIN	http://amigo.geneontology.org/amigo/term/GO:0042995
Rac GTPase binding	Gene Ontology	GO:0048365	4	40	0.0787486	0.319656	CORO1C	FAM49A	ELMO2	SOD1	http://amigo.geneontology.org/amigo/term/GO:0048365
positive regulation of peptidyl-serine phosphorylation	Gene Ontology	GO:0033138	5	57	0.0789064	0.319656	MAD2L2	PIK3CA	LATS1	EIF4G1	BAG4	http://amigo.geneontology.org/amigo/term/GO:0033138
spindle pole	Gene Ontology	GO:0000922	5	57	0.0789064	0.319656	CENPF	LATS1	PKP4	TUBGCP5	KIF11	http://amigo.geneontology.org/amigo/term/GO:0000922
centriole	Gene Ontology	GO:0005814	6	75	0.0793255	0.319656	STIL	NIN	PCM1	BCCIP	ARMC9	CEP350	http://amigo.geneontology.org/amigo/term/GO:0005814
positive regulation of I-kappaB kinase/NF-kappaB signaling	Gene Ontology	GO:0043123	6	75	0.0793255	0.319656	ALPK1	TBK1	CHUK	CTNNB1	RELA	DHX36	http://amigo.geneontology.org/amigo/term/GO:0043123
nuclear speck	Gene Ontology	GO:0016607	14	235	0.0798671	0.319656	EPAS1	DAZAP2	POMP	LPXN	WRN	PRPF4B	SRSF11	RBM14	PPIG	DENND1B	TRIP12	TAF5L	RBM39	DHX36	http://amigo.geneontology.org/amigo/term/GO:0016607
diacylglycerol kinase activity	Gene Ontology	GO:0004143	2	11	0.0813798	0.319656	AGK	DGKE	http://amigo.geneontology.org/amigo/term/GO:0004143
positive regulation of epidermal growth factor receptor signaling pathway	Gene Ontology	GO:0045742	2	11	0.0813798	0.319656	AGT	HIP1	http://amigo.geneontology.org/amigo/term/GO:0045742
HMG box domain binding	Gene Ontology	GO:0071837	2	11	0.0813798	0.319656	HHEX	HOXA3	http://amigo.geneontology.org/amigo/term/GO:0071837
ruffle assembly	Gene Ontology	GO:0097178	2	11	0.0813798	0.319656	BAG4	INPPL1	http://amigo.geneontology.org/amigo/term/GO:0097178
negative regulation of pri-miRNA transcription by RNA polymerase II	Gene Ontology	GO:1902894	2	11	0.0813798	0.319656	PPARD	RELA	http://amigo.geneontology.org/amigo/term/GO:1902894
histone H4-K16 acetylation	Gene Ontology	GO:0043984	2	11	0.0813798	0.319656	OGT	MSL3	http://amigo.geneontology.org/amigo/term/GO:0043984
positive regulation of release of cytochrome c from mitochondria	Gene Ontology	GO:0090200	2	11	0.0813798	0.319656	PPIF	BID	http://amigo.geneontology.org/amigo/term/GO:0090200
embryonic brain development	Gene Ontology	GO:1990403	2	11	0.0813798	0.319656	CTNNB1	MED12	http://amigo.geneontology.org/amigo/term/GO:1990403
ion transport	Gene Ontology	GO:0006811	2	11	0.0813798	0.319656	PDZD3	KCNN1	http://amigo.geneontology.org/amigo/term/GO:0006811
transcription factor TFTC complex	Gene Ontology	GO:0033276	2	11	0.0813798	0.319656	TAF6	TAF5L	http://amigo.geneontology.org/amigo/term/GO:0033276
sphingosine biosynthetic process	Gene Ontology	GO:0046512	2	11	0.0813798	0.319656	AGK	ABCA2	http://amigo.geneontology.org/amigo/term/GO:0046512
regulation of nucleic acid-templated transcription	Gene Ontology	GO:1903506	2	11	0.0813798	0.319656	LPXN	ACTN4	http://amigo.geneontology.org/amigo/term/GO:1903506
proteasome regulatory particle, base subcomplex	Gene Ontology	GO:0008540	2	11	0.0813798	0.319656	PSMC1	PSMC6	http://amigo.geneontology.org/amigo/term/GO:0008540
positive regulation of receptor-mediated endocytosis	Gene Ontology	GO:0048260	2	11	0.0813798	0.319656	C3	HIP1	http://amigo.geneontology.org/amigo/term/GO:0048260
superoxide-generating NAD(P)H oxidase activity	Gene Ontology	GO:0016175	2	11	0.0813798	0.319656	CYBA	NOX4	http://amigo.geneontology.org/amigo/term/GO:0016175
Ras guanyl-nucleotide exchange factor activity	Gene Ontology	GO:0005088	2	11	0.0813798	0.319656	ADRB1	RASGRP3	http://amigo.geneontology.org/amigo/term/GO:0005088
protein kinase regulator activity	Gene Ontology	GO:0019887	2	11	0.0813798	0.319656	PRKAG2	CDC37	http://amigo.geneontology.org/amigo/term/GO:0019887
plasma membrane tubulation	Gene Ontology	GO:0097320	2	11	0.0813798	0.319656	EHD2	PACSIN3	http://amigo.geneontology.org/amigo/term/GO:0097320
negative regulation of telomere maintenance via telomerase	Gene Ontology	GO:0032211	2	11	0.0813798	0.319656	POT1	NAT10	http://amigo.geneontology.org/amigo/term/GO:0032211
low-density lipoprotein particle receptor binding	Gene Ontology	GO:0050750	2	11	0.0813798	0.319656	LRPAP1	HSP90B1	http://amigo.geneontology.org/amigo/term/GO:0050750
Cul4A-RING E3 ubiquitin ligase complex	Gene Ontology	GO:0031464	2	11	0.0813798	0.319656	DDB1	TRPC4AP	http://amigo.geneontology.org/amigo/term/GO:0031464
exit from mitosis	Gene Ontology	GO:0010458	2	11	0.0813798	0.319656	UBE2S	CLASP1	http://amigo.geneontology.org/amigo/term/GO:0010458
GTP metabolic process	Gene Ontology	GO:0046039	2	11	0.0813798	0.319656	EFL1	GNAI3	http://amigo.geneontology.org/amigo/term/GO:0046039
low-density lipoprotein particle binding	Gene Ontology	GO:0030169	2	11	0.0813798	0.319656	STAB1	STAB2	http://amigo.geneontology.org/amigo/term/GO:0030169
ubiquitin-dependent protein catabolic process via the multivesicular body sorting pathway	Gene Ontology	GO:0043162	2	11	0.0813798	0.319656	VPS37C	VPS37A	http://amigo.geneontology.org/amigo/term/GO:0043162
negative regulation of reactive oxygen species metabolic process	Gene Ontology	GO:2000378	2	11	0.0813798	0.319656	HK2	BRCA1	http://amigo.geneontology.org/amigo/term/GO:2000378
sphingolipid metabolic process	Gene Ontology	GO:0006665	2	11	0.0813798	0.319656	AGK	PSAP	http://amigo.geneontology.org/amigo/term/GO:0006665
cell junction	Gene Ontology	GO:0030054	6	76	0.0830578	0.320809	CCDC88C	ACTN4	ABI1	PUF60	CCDC66	SCIN	http://amigo.geneontology.org/amigo/term/GO:0030054
regulation of gene expression	Gene Ontology	GO:0010468	8	114	0.0831563	0.320809	ICK	PRDM11	PIK3CA	CDK10	FUBP1	FUBP3	NLK	FUT8	http://amigo.geneontology.org/amigo/term/GO:0010468
beta-catenin binding	Gene Ontology	GO:0008013	5	58	0.0832381	0.320809	CTNNB1	MED12	DLG5	TCF7	DACT2	http://amigo.geneontology.org/amigo/term/GO:0008013
transcription initiation from RNA polymerase II promoter	Gene Ontology	GO:0006367	3	25	0.083321	0.320809	TAF6	MED12	MED16	http://amigo.geneontology.org/amigo/term/GO:0006367
response to insulin	Gene Ontology	GO:0032868	3	25	0.083321	0.320809	OGT	MTOR	INPPL1	http://amigo.geneontology.org/amigo/term/GO:0032868
forebrain development	Gene Ontology	GO:0030900	3	25	0.083321	0.320809	ATRX	TOP2B	NR2F2	http://amigo.geneontology.org/amigo/term/GO:0030900
negative regulation of T cell proliferation	Gene Ontology	GO:0042130	3	25	0.083321	0.320809	DLG5	SDC4	PDE5A	http://amigo.geneontology.org/amigo/term/GO:0042130
vesicle docking involved in exocytosis	Gene Ontology	GO:0006904	3	25	0.083321	0.320809	RAB12	EXOC6	SYTL2	http://amigo.geneontology.org/amigo/term/GO:0006904
intermediate filament cytoskeleton	Gene Ontology	GO:0045111	3	25	0.083321	0.320809	NDOR1	NOL9	DDX60	http://amigo.geneontology.org/amigo/term/GO:0045111
regulation of neurogenesis	Gene Ontology	GO:0050767	3	25	0.083321	0.320809	DLL4	CHD7	PRUNE1	http://amigo.geneontology.org/amigo/term/GO:0050767
Rho guanyl-nucleotide exchange factor activity	Gene Ontology	GO:0005089	3	25	0.083321	0.320809	ARHGEF11	FGD6	DOCK11	http://amigo.geneontology.org/amigo/term/GO:0005089
sprouting angiogenesis	Gene Ontology	GO:0002040	3	25	0.083321	0.320809	RECK	VEGFA	RNF213	http://amigo.geneontology.org/amigo/term/GO:0002040
phosphatase binding	Gene Ontology	GO:0019902	3	25	0.083321	0.320809	SYTL2	CSRNP2	TRPC4AP	http://amigo.geneontology.org/amigo/term/GO:0019902
positive regulation of cell growth	Gene Ontology	GO:0030307	4	41	0.0840277	0.321713	ERBB2	DDX49	ZNF639	EIF4G1	http://amigo.geneontology.org/amigo/term/GO:0030307
intercellular bridge	Gene Ontology	GO:0045171	4	41	0.0840277	0.321713	RAB11FIP3	TRIM45	KRR1	EHD2	http://amigo.geneontology.org/amigo/term/GO:0045171
heart looping	Gene Ontology	GO:0001947	4	41	0.0840277	0.321713	TBX21	DLL1	IFT57	TBX3	http://amigo.geneontology.org/amigo/term/GO:0001947
chromosome	Gene Ontology	GO:0005694	4	41	0.0840277	0.321713	WRN	MAD2L2	PRPF4B	PARP1	http://amigo.geneontology.org/amigo/term/GO:0005694
cilium	Gene Ontology	GO:0005929	6	77	0.0868859	0.332189	CLUAP1	ICK	IFT57	IFT80	TTLL9	ANKS3	http://amigo.geneontology.org/amigo/term/GO:0005929
protein kinase activity	Gene Ontology	GO:0004672	7	96	0.0874207	0.333766	RPS6KL1	SCYL3	ADCK1	CHUK	STK35	MMD	RNASEL	http://amigo.geneontology.org/amigo/term/GO:0004672
chromatin DNA binding	Gene Ontology	GO:0031490	4	42	0.0894753	0.339156	WBP2NL	RELA	EZH2	ACTN4	http://amigo.geneontology.org/amigo/term/GO:0031490
endoplasmic reticulum-Golgi intermediate compartment	Gene Ontology	GO:0005793	4	42	0.0894753	0.339156	LRPAP1	PDIA6	MPPE1	MGAT4A	http://amigo.geneontology.org/amigo/term/GO:0005793
DNA-dependent ATPase activity	Gene Ontology	GO:0008094	3	26	0.0904944	0.339156	SMARCAD1	XRCC3	SMARCA5	http://amigo.geneontology.org/amigo/term/GO:0008094
negative regulation of cell death	Gene Ontology	GO:0060548	3	26	0.0904944	0.339156	LRPAP1	DUS2	TXNDC12	http://amigo.geneontology.org/amigo/term/GO:0060548
phosphatidylinositol 3-kinase signaling	Gene Ontology	GO:0014065	3	26	0.0904944	0.339156	ERBB2	PIK3CA	PREX2	http://amigo.geneontology.org/amigo/term/GO:0014065
embryonic forelimb morphogenesis	Gene Ontology	GO:0035115	3	26	0.0904944	0.339156	CTNNB1	TBX3	RECK	http://amigo.geneontology.org/amigo/term/GO:0035115
erythrocyte differentiation	Gene Ontology	GO:0030218	3	26	0.0904944	0.339156	UFL1	EPAS1	PKNOX1	http://amigo.geneontology.org/amigo/term/GO:0030218
learning	Gene Ontology	GO:0007612	3	26	0.0904944	0.339156	VDAC3	ATP8A1	GMFB	http://amigo.geneontology.org/amigo/term/GO:0007612
mitotic spindle	Gene Ontology	GO:0072686	5	60	0.0922693	0.339156	SPOUT1	PKP4	KIF11	CLASP1	CLASP2	http://amigo.geneontology.org/amigo/term/GO:0072686
protein homotrimerization	Gene Ontology	GO:0070207	2	12	0.0926895	0.339156	PNPT1	HSF2	http://amigo.geneontology.org/amigo/term/GO:0070207
response to tumor necrosis factor	Gene Ontology	GO:0034612	2	12	0.0926895	0.339156	MAP4K3	ADAM9	http://amigo.geneontology.org/amigo/term/GO:0034612
maturation of SSU-rRNA	Gene Ontology	GO:0030490	2	12	0.0926895	0.339156	DDX52	NOP14	http://amigo.geneontology.org/amigo/term/GO:0030490
secretory granule membrane	Gene Ontology	GO:0030667	2	12	0.0926895	0.339156	ITPR1	SCG3	http://amigo.geneontology.org/amigo/term/GO:0030667
regulation of cytoskeleton organization	Gene Ontology	GO:0051493	2	12	0.0926895	0.339156	CNTRL	STMN1	http://amigo.geneontology.org/amigo/term/GO:0051493
myofibril assembly	Gene Ontology	GO:0030239	2	12	0.0926895	0.339156	MYH11	FLII	http://amigo.geneontology.org/amigo/term/GO:0030239
neuron projection extension	Gene Ontology	GO:1990138	2	12	0.0926895	0.339156	CTNNB1	ALCAM	http://amigo.geneontology.org/amigo/term/GO:1990138
cellular response to hepatocyte growth factor stimulus	Gene Ontology	GO:0035729	2	12	0.0926895	0.339156	APPL1	RELA	http://amigo.geneontology.org/amigo/term/GO:0035729
protein kinase A binding	Gene Ontology	GO:0051018	2	12	0.0926895	0.339156	AKAP10	DACT2	http://amigo.geneontology.org/amigo/term/GO:0051018
ventricular trabecula myocardium morphogenesis	Gene Ontology	GO:0003222	2	12	0.0926895	0.339156	DLL4	CHD7	http://amigo.geneontology.org/amigo/term/GO:0003222
regulation of myelination	Gene Ontology	GO:0031641	2	12	0.0926895	0.339156	CTNNB1	MTOR	http://amigo.geneontology.org/amigo/term/GO:0031641
protein neddylation	Gene Ontology	GO:0045116	2	12	0.0926895	0.339156	NAE1	UBE2F	http://amigo.geneontology.org/amigo/term/GO:0045116
mRNA splice site selection	Gene Ontology	GO:0006376	2	12	0.0926895	0.339156	PUF60	LUC7L	http://amigo.geneontology.org/amigo/term/GO:0006376
negative regulation of cell cycle arrest	Gene Ontology	GO:0071157	2	12	0.0926895	0.339156	MLXIPL	MDM4	http://amigo.geneontology.org/amigo/term/GO:0071157
BLOC-1 complex	Gene Ontology	GO:0031083	2	12	0.0926895	0.339156	BLOC1S6	BLOC1S5	http://amigo.geneontology.org/amigo/term/GO:0031083
dynein heavy chain binding	Gene Ontology	GO:0045504	2	12	0.0926895	0.339156	DYNC1I2	DYNC1LI2	http://amigo.geneontology.org/amigo/term/GO:0045504
nuclear periphery	Gene Ontology	GO:0034399	2	12	0.0926895	0.339156	NUP98	NUP107	http://amigo.geneontology.org/amigo/term/GO:0034399
endosome transport via multivesicular body sorting pathway	Gene Ontology	GO:0032509	2	12	0.0926895	0.339156	VPS37C	VPS37A	http://amigo.geneontology.org/amigo/term/GO:0032509
regulation of centrosome duplication	Gene Ontology	GO:0010824	2	12	0.0926895	0.339156	XRCC3	NPM1	http://amigo.geneontology.org/amigo/term/GO:0010824
complement activation	Gene Ontology	GO:0006956	2	12	0.0926895	0.339156	C3	C4	http://amigo.geneontology.org/amigo/term/GO:0006956
scavenger receptor activity	Gene Ontology	GO:0005044	4	43	0.0950879	0.346074	ENPP2	STAB2	STAB1	CD5	http://amigo.geneontology.org/amigo/term/GO:0005044
manganese ion binding	Gene Ontology	GO:0030145	4	43	0.0950879	0.346074	WRN	NPEPL1	MPPE1	PRIMPOL	http://amigo.geneontology.org/amigo/term/GO:0030145
autophagosome	Gene Ontology	GO:0005776	4	43	0.0950879	0.346074	MAP1LC3A	RAB12	OPTN	RAB24	http://amigo.geneontology.org/amigo/term/GO:0005776
cell surface	Gene Ontology	GO:0009986	15	264	0.0957717	0.348098	ITGA8	ITGB5	ANTXR2	PHB2	LRP6	SDC4	SULF1	TNFRSF10B	GRIN2A	TFPI	C3	TREM-B1	TNS1	RC3H2	RGMA	http://amigo.geneontology.org/amigo/term/GO:0009986
microtubule cytoskeleton	Gene Ontology	GO:0015630	5	61	0.0969661	0.35197	RASSF1	MTUS1	MCM2	EHD2	SPTAN1	http://amigo.geneontology.org/amigo/term/GO:0015630
anchored component of membrane	Gene Ontology	GO:0031225	3	27	0.0979149	0.352597	RECK	GFRA4	RGMA	http://amigo.geneontology.org/amigo/term/GO:0031225
neuron apoptotic process	Gene Ontology	GO:0051402	3	27	0.0979149	0.352597	NAE1	CDK5	RB1	http://amigo.geneontology.org/amigo/term/GO:0051402
SH2 domain binding	Gene Ontology	GO:0042169	3	27	0.0979149	0.352597	CTR9	NLK	INPPL1	http://amigo.geneontology.org/amigo/term/GO:0042169
acrosomal vesicle	Gene Ontology	GO:0001669	3	27	0.0979149	0.352597	CRCP	SCNN1A	ATP6V0A2	http://amigo.geneontology.org/amigo/term/GO:0001669
cellular response to hydrogen peroxide	Gene Ontology	GO:0070301	3	27	0.0979149	0.352597	PPIF	RELA	EZH2	http://amigo.geneontology.org/amigo/term/GO:0070301
protein targeting to membrane	Gene Ontology	GO:0006612	3	27	0.0979149	0.352597	VPS37C	ZDHHC18	VPS37A	http://amigo.geneontology.org/amigo/term/GO:0006612
vasculogenesis	Gene Ontology	GO:0001570	4	44	0.100862	0.360638	SGPL1	HHEX	MYO18B	PAXIP1	http://amigo.geneontology.org/amigo/term/GO:0001570
adenylate cyclase-modulating G protein-coupled receptor signaling pathway	Gene Ontology	GO:0007188	4	44	0.100862	0.360638	GCGR	VIPR2	GNAI3	ADRB1	http://amigo.geneontology.org/amigo/term/GO:0007188
Notch signaling pathway	Gene Ontology	GO:0007219	5	62	0.101782	0.360638	AGXT	DLL1	APH1A	HHEX	DLL4	http://amigo.geneontology.org/amigo/term/GO:0007219
nuclear membrane	Gene Ontology	GO:0031965	8	120	0.102535	0.360638	ZBED1	SMOX	NUP98	ZC3HC1	NUP107	SENP1	RRP12	KLHDC2	http://amigo.geneontology.org/amigo/term/GO:0031965
protein domain specific binding	Gene Ontology	GO:0019904	8	120	0.102535	0.360638	EHD2	ACSL3	MYH9	KHDRBS1	PRKDC	MED12	CTBP1	GUSB	http://amigo.geneontology.org/amigo/term/GO:0019904
telomerase RNA binding	Gene Ontology	GO:0070034	2	13	0.104419	0.360638	NHP2	DHX36	http://amigo.geneontology.org/amigo/term/GO:0070034
negative regulation of interleukin-6 production	Gene Ontology	GO:0032715	2	13	0.104419	0.360638	PTPN22	NLRC3	http://amigo.geneontology.org/amigo/term/GO:0032715
5'-nucleotidase activity	Gene Ontology	GO:0008253	2	13	0.104419	0.360638	NT5DC4	NT5C3B	http://amigo.geneontology.org/amigo/term/GO:0008253
response to gamma radiation	Gene Ontology	GO:0010332	2	13	0.104419	0.360638	FANCD2	PRKDC	http://amigo.geneontology.org/amigo/term/GO:0010332
negative regulation of apoptotic signaling pathway	Gene Ontology	GO:2001234	2	13	0.104419	0.360638	CTNNB1	ING2	http://amigo.geneontology.org/amigo/term/GO:2001234
negative regulation of osteoclast differentiation	Gene Ontology	GO:0045671	2	13	0.104419	0.360638	CTNNB1	GPR137B	http://amigo.geneontology.org/amigo/term/GO:0045671
histone H3 deacetylation	Gene Ontology	GO:0070932	2	13	0.104419	0.360638	SMARCAD1	SFPQ	http://amigo.geneontology.org/amigo/term/GO:0070932
DNA unwinding involved in DNA replication	Gene Ontology	GO:0006268	2	13	0.104419	0.360638	WRN	MCM2	http://amigo.geneontology.org/amigo/term/GO:0006268
very long-chain fatty acid biosynthetic process	Gene Ontology	GO:0042761	2	13	0.104419	0.360638	ELOVL5	ELOVL1	http://amigo.geneontology.org/amigo/term/GO:0042761
lipid phosphorylation	Gene Ontology	GO:0046834	2	13	0.104419	0.360638	AGK	DGKE	http://amigo.geneontology.org/amigo/term/GO:0046834
retrograde protein transport, ER to cytosol	Gene Ontology	GO:0030970	2	13	0.104419	0.360638	HERPUD1	HSP90B1	http://amigo.geneontology.org/amigo/term/GO:0030970
B cell homeostasis	Gene Ontology	GO:0001782	2	13	0.104419	0.360638	RC3H2	DOCK11	http://amigo.geneontology.org/amigo/term/GO:0001782
regulation of ERK1 and ERK2 cascade	Gene Ontology	GO:0070372	2	13	0.104419	0.360638	ERBB2	TRAF7	http://amigo.geneontology.org/amigo/term/GO:0070372
nBAF complex	Gene Ontology	GO:0071565	2	13	0.104419	0.360638	SMARCC2	SMARCC1	http://amigo.geneontology.org/amigo/term/GO:0071565
negative regulation of NIK/NF-kappaB signaling	Gene Ontology	GO:1901223	2	13	0.104419	0.360638	RELA	NLRC3	http://amigo.geneontology.org/amigo/term/GO:1901223
mRNA 3'-UTR AU-rich region binding	Gene Ontology	GO:0035925	2	13	0.104419	0.360638	DHX36	ILF3	http://amigo.geneontology.org/amigo/term/GO:0035925
COPII vesicle coat	Gene Ontology	GO:0030127	2	13	0.104419	0.360638	SEC13	SAR1B	http://amigo.geneontology.org/amigo/term/GO:0030127
vascular endothelial growth factor receptor signaling pathway	Gene Ontology	GO:0048010	2	13	0.104419	0.360638	VEGFA	SULF1	http://amigo.geneontology.org/amigo/term/GO:0048010
transcription coactivator binding	Gene Ontology	GO:0001223	2	13	0.104419	0.360638	PPARD	ZBTB17	http://amigo.geneontology.org/amigo/term/GO:0001223
gastrulation with mouth forming second	Gene Ontology	GO:0001702	2	13	0.104419	0.360638	CTNNB1	ZBTB17	http://amigo.geneontology.org/amigo/term/GO:0001702
regulated exocytosis	Gene Ontology	GO:0045055	2	13	0.104419	0.360638	MYH9	RAB11B	http://amigo.geneontology.org/amigo/term/GO:0045055
FMN binding	Gene Ontology	GO:0010181	2	13	0.104419	0.360638	NDOR1	DUS2	http://amigo.geneontology.org/amigo/term/GO:0010181
ventricular system development	Gene Ontology	GO:0021591	2	13	0.104419	0.360638	CORO1C	CENPF	http://amigo.geneontology.org/amigo/term/GO:0021591
telomere maintenance via telomerase	Gene Ontology	GO:0007004	2	13	0.104419	0.360638	NHP2	POT1	http://amigo.geneontology.org/amigo/term/GO:0007004
ubiquinone biosynthetic process	Gene Ontology	GO:0006744	2	13	0.104419	0.360638	COQ5	FDXR	http://amigo.geneontology.org/amigo/term/GO:0006744
positive regulation of epithelial to mesenchymal transition	Gene Ontology	GO:0010718	3	28	0.105572	0.360638	EZH2	MTOR	GCNT2	http://amigo.geneontology.org/amigo/term/GO:0010718
phosphatase activity	Gene Ontology	GO:0016791	3	28	0.105572	0.360638	PRUNE1	PLPPR3	NT5C3B	http://amigo.geneontology.org/amigo/term/GO:0016791
positive regulation of endothelial cell migration	Gene Ontology	GO:0010595	3	28	0.105572	0.360638	AGT	GPLD1	ATOH8	http://amigo.geneontology.org/amigo/term/GO:0010595
regulation of cell growth	Gene Ontology	GO:0001558	3	28	0.105572	0.360638	MAD2L2	MTOR	URI1	http://amigo.geneontology.org/amigo/term/GO:0001558
I-kappaB kinase/NF-kappaB signaling	Gene Ontology	GO:0007249	3	28	0.105572	0.360638	RELA	CHUK	NLRC3	http://amigo.geneontology.org/amigo/term/GO:0007249
mitotic spindle organization	Gene Ontology	GO:0007052	3	28	0.105572	0.360638	BCCIP	NDC80	STIL	http://amigo.geneontology.org/amigo/term/GO:0007052
embryonic hindlimb morphogenesis	Gene Ontology	GO:0035116	3	28	0.105572	0.360638	CTNNB1	TBX3	CHD7	http://amigo.geneontology.org/amigo/term/GO:0035116
electron transfer activity	Gene Ontology	GO:0009055	3	28	0.105572	0.360638	NDUFS1	CYBA	GLRX2	http://amigo.geneontology.org/amigo/term/GO:0009055
tRNA methylation	Gene Ontology	GO:0030488	3	28	0.105572	0.360638	METTL8	TRMT12	TARBP1	http://amigo.geneontology.org/amigo/term/GO:0030488
neuron projection development	Gene Ontology	GO:0031175	5	63	0.106714	0.36209	BLOC1S6	PPP1R9B	STMN1	RB1	RGMA	http://amigo.geneontology.org/amigo/term/GO:0031175
Schaffer collateral - CA1 synapse	Gene Ontology	GO:0098685	4	45	0.106794	0.36209	GRASP	CTNNB1	ITPR1	ADRB1	http://amigo.geneontology.org/amigo/term/GO:0098685
phagocytic vesicle	Gene Ontology	GO:0045335	4	45	0.106794	0.36209	ANXA11	STX8	AMBRA1	RAB12	http://amigo.geneontology.org/amigo/term/GO:0045335
protein localization	Gene Ontology	GO:0008104	4	45	0.106794	0.36209	HEATR5B	NIN	AKAP10	NBEAL2	http://amigo.geneontology.org/amigo/term/GO:0008104
regulation of catalytic activity	Gene Ontology	GO:0050790	4	45	0.106794	0.36209	GRPEL2	PRKAG2	PARP1	CAPN1	http://amigo.geneontology.org/amigo/term/GO:0050790
signaling receptor activity	Gene Ontology	GO:0038023	6	83	0.111827	0.378683	MRC1	ITGB5	PAQR3	GFRA4	GRIN2A	TREM-B1	http://amigo.geneontology.org/amigo/term/GO:0038023
extracellular matrix structural constituent	Gene Ontology	GO:0005201	4	46	0.11288	0.380416	MATN1	COL3A1	ELN	LAMA1	http://amigo.geneontology.org/amigo/term/GO:0005201
mitochondrion organization	Gene Ontology	GO:0007005	4	46	0.11288	0.380416	PHB2	EPAS1	YME1L1	ADCK1	http://amigo.geneontology.org/amigo/term/GO:0007005
drug binding	Gene Ontology	GO:0008144	3	29	0.113455	0.380416	PPARD	SRP54	DCAF15	http://amigo.geneontology.org/amigo/term/GO:0008144
positive regulation of Notch signaling pathway	Gene Ontology	GO:0045747	3	29	0.113455	0.380416	DLL1	LFNG	DLL4	http://amigo.geneontology.org/amigo/term/GO:0045747
nuclear receptor transcription coactivator activity	Gene Ontology	GO:0030374	3	29	0.113455	0.380416	HMGA1	RBM14	ACTN4	http://amigo.geneontology.org/amigo/term/GO:0030374
positive regulation of interleukin-6 production	Gene Ontology	GO:0032755	3	29	0.113455	0.380416	PTPN11	CYBA	IFIH1	http://amigo.geneontology.org/amigo/term/GO:0032755
cytoskeletal protein binding	Gene Ontology	GO:0008092	3	29	0.113455	0.380416	CNTRL	DLG5	PACSIN3	http://amigo.geneontology.org/amigo/term/GO:0008092
transcription regulator complex	Gene Ontology	GO:0005667	10	165	0.115379	0.380866	EPAS1	TCF7	RBL1	MLXIPL	PARP1	RB1	PRKDC	RBM14	RELA	PKNOX1	http://amigo.geneontology.org/amigo/term/GO:0005667
metalloendopeptidase activity	Gene Ontology	GO:0004222	6	84	0.116304	0.380866	SGPL1	YME1L1	ADAM9	PITRM1	IDE	COPS5	http://amigo.geneontology.org/amigo/term/GO:0004222
nuclear localization sequence binding	Gene Ontology	GO:0008139	2	14	0.116523	0.380866	NUP214	KPNA3	http://amigo.geneontology.org/amigo/term/GO:0008139
structural constituent of muscle	Gene Ontology	GO:0008307	2	14	0.116523	0.380866	MYH11	JPH1	http://amigo.geneontology.org/amigo/term/GO:0008307
proline-rich region binding	Gene Ontology	GO:0070064	2	14	0.116523	0.380866	TCERG1	APBB1	http://amigo.geneontology.org/amigo/term/GO:0070064
DNA-templated transcription, initiation	Gene Ontology	GO:0006352	2	14	0.116523	0.380866	SMARCA5	RSF1	http://amigo.geneontology.org/amigo/term/GO:0006352
pericentriolar material	Gene Ontology	GO:0000242	2	14	0.116523	0.380866	TNKS2	NIN	http://amigo.geneontology.org/amigo/term/GO:0000242
protein O-linked glycosylation	Gene Ontology	GO:0006493	2	14	0.116523	0.380866	OGT	B3GALNT2	http://amigo.geneontology.org/amigo/term/GO:0006493
cysteine-type endopeptidase inhibitor activity	Gene Ontology	GO:0004869	2	14	0.116523	0.380866	CST3	PTTG2	http://amigo.geneontology.org/amigo/term/GO:0004869
histone H2A acetylation	Gene Ontology	GO:0043968	2	14	0.116523	0.380866	ING3	MSL3	http://amigo.geneontology.org/amigo/term/GO:0043968
regulation of translational initiation	Gene Ontology	GO:0006446	2	14	0.116523	0.380866	EIF4G1	EIF2B2	http://amigo.geneontology.org/amigo/term/GO:0006446
Fanconi anaemia nuclear complex	Gene Ontology	GO:0043240	2	14	0.116523	0.380866	FANCB	FANCA	http://amigo.geneontology.org/amigo/term/GO:0043240
3'-5' DNA helicase activity	Gene Ontology	GO:0043138	2	14	0.116523	0.380866	WRN	MCM2	http://amigo.geneontology.org/amigo/term/GO:0043138
endoderm development	Gene Ontology	GO:0007492	2	14	0.116523	0.380866	MED12	HHEX	http://amigo.geneontology.org/amigo/term/GO:0007492
positive regulation of transcription initiation from RNA polymerase II promoter	Gene Ontology	GO:0060261	2	14	0.116523	0.380866	DHX36	PAXIP1	http://amigo.geneontology.org/amigo/term/GO:0060261
centrosome localization	Gene Ontology	GO:0051642	2	14	0.116523	0.380866	SUN2	NIN	http://amigo.geneontology.org/amigo/term/GO:0051642
integrin complex	Gene Ontology	GO:0008305	2	14	0.116523	0.380866	ITGA8	ITGB5	http://amigo.geneontology.org/amigo/term/GO:0008305
regulation of angiogenesis	Gene Ontology	GO:0045765	2	14	0.116523	0.380866	RECK	ENPP2	http://amigo.geneontology.org/amigo/term/GO:0045765
mitochondrial cytochrome c oxidase assembly	Gene Ontology	GO:0033617	2	14	0.116523	0.380866	SCO1	BCS1L	http://amigo.geneontology.org/amigo/term/GO:0033617
negative regulation of cell cycle	Gene Ontology	GO:0045786	2	14	0.116523	0.380866	TAF6	THAP5	http://amigo.geneontology.org/amigo/term/GO:0045786
extracellular space	Gene Ontology	GO:0005615	35	731	0.11695	0.381803	SERPINA10	CKB	CHGA	GPLD1	DLK1	MDH1	COL3A1	AGT	IDE	CLEC3B	CTSO	SULF1	FAU	BF2	BF1	TFPI	C3	SERPINI1	ADAM9	C5	GUSB	LAMA1	SOD1	PDIA6	ENPP2	PLAU	PLA2G2E	CST3	IL18	VEGFA	F5	PSAP	C1QTNF5	SMPD1	C4	http://amigo.geneontology.org/amigo/term/GO:0005615
lamellipodium	Gene Ontology	GO:0030027	7	104	0.11748	0.383076	PIK3CA	ABI1	SCYL3	APBB1	CTNNB1	CORO1C	PARVB	http://amigo.geneontology.org/amigo/term/GO:0030027
cell cycle	Gene Ontology	GO:0007049	4	47	0.119115	0.387017	MAD2L2	CCPG1	RB1	CHAF1B	http://amigo.geneontology.org/amigo/term/GO:0007049
apical part of cell	Gene Ontology	GO:0045177	4	47	0.119115	0.387017	CTNNB1	NIN	ITGA8	PDZD3	http://amigo.geneontology.org/amigo/term/GO:0045177
serine-type endopeptidase inhibitor activity	Gene Ontology	GO:0004867	4	47	0.119115	0.387017	RECK	SERPINA10	SERPINI1	TFPI	http://amigo.geneontology.org/amigo/term/GO:0004867
RNA polymerase II cis-regulatory region sequence-specific DNA binding	Gene Ontology	GO:0000978	21	409	0.120239	0.389943	NFYB	ZBED1	ZNF639	HSF2	ZBTB17	CHD7	TBX3	MLXIPL	FUBP3	SP3	MED12	HESX1	PPARD	EZH2	HOXA3	TCF7	RELA	EPAS1	PAXBP1	PKNOX1	DHX36	http://amigo.geneontology.org/amigo/term/GO:0000978
DNA-binding transcription activator activity, RNA polymerase II-specific	Gene Ontology	GO:0001228	17	319	0.120343	0.389943	ZBED1	ZNF639	HSF2	ZBTB17	TCF7	TBX21	FUBP3	PARP1	CSRNP2	CREB3L2	TBX3	CREBRF	MGA	RELA	EPAS1	MDM4	ATF2	http://amigo.geneontology.org/amigo/term/GO:0001228
trans-Golgi network	Gene Ontology	GO:0005802	8	125	0.120445	0.389943	STX8	OPTN	ATP8A1	GOLT1A	GGA3	ATP11C	CLTCL1	CHST6	http://amigo.geneontology.org/amigo/term/GO:0005802
cellular response to UV	Gene Ontology	GO:0034644	3	30	0.121553	0.391596	N4BP1	PARP1	DHX36	http://amigo.geneontology.org/amigo/term/GO:0034644
protein-containing complex assembly	Gene Ontology	GO:0065003	3	30	0.121553	0.391596	DLG5	CLGN	MDM4	http://amigo.geneontology.org/amigo/term/GO:0065003
regulation of blood pressure	Gene Ontology	GO:0008217	3	30	0.121553	0.391596	DLL1	EDNRB	SOD1	http://amigo.geneontology.org/amigo/term/GO:0008217
hemopoiesis	Gene Ontology	GO:0030097	3	30	0.121553	0.391596	SGPL1	TAZ	CRIP2	http://amigo.geneontology.org/amigo/term/GO:0030097
early endosome	Gene Ontology	GO:0005769	9	146	0.121674	0.391596	STX8	TMEM127	RAB5A	EHD2	INPP5F	ADRB1	NIPA1	APPL1	LRP6	http://amigo.geneontology.org/amigo/term/GO:0005769
angiogenesis	Gene Ontology	GO:0001525	8	126	0.124214	0.3993	UBP1	IL18	EPAS1	MYH9	NRXN1	VEGFA	HOXA3	PKNOX1	http://amigo.geneontology.org/amigo/term/GO:0001525
microtubule cytoskeleton organization	Gene Ontology	GO:0000226	6	86	0.125522	0.399929	CLASP2	CLASP1	BIRC5	TTLL9	DYNC1LI2	TUBD1	http://amigo.geneontology.org/amigo/term/GO:0000226
synaptic vesicle	Gene Ontology	GO:0008021	5	67	0.127572	0.399929	SNAP91	RAB12	GRIN2A	RAB5A	COPS5	http://amigo.geneontology.org/amigo/term/GO:0008021
animal organ morphogenesis	Gene Ontology	GO:0009887	5	67	0.127572	0.399929	SMARCC1	LAMA1	RELA	ASXL2	CUL1	http://amigo.geneontology.org/amigo/term/GO:0009887
cell-cell adhesion	Gene Ontology	GO:0098609	5	67	0.127572	0.399929	CTNNB1	MYH9	PKP4	VEZT	ELMO2	http://amigo.geneontology.org/amigo/term/GO:0098609
endothelial cell migration	Gene Ontology	GO:0043542	2	15	0.128957	0.399929	LPXN	PAXIP1	http://amigo.geneontology.org/amigo/term/GO:0043542
clathrin coat assembly	Gene Ontology	GO:0048268	2	15	0.128957	0.399929	SNAP91	HIP1	http://amigo.geneontology.org/amigo/term/GO:0048268
cell-cell adhesion mediator activity	Gene Ontology	GO:0098632	2	15	0.128957	0.399929	NPTN	IGSF9	http://amigo.geneontology.org/amigo/term/GO:0098632
zinc ion transmembrane transporter activity	Gene Ontology	GO:0005385	2	15	0.128957	0.399929	SLC39A13	SLC39A3	http://amigo.geneontology.org/amigo/term/GO:0005385
sphingolipid biosynthetic process	Gene Ontology	GO:0030148	2	15	0.128957	0.399929	ELOVL5	ELOVL1	http://amigo.geneontology.org/amigo/term/GO:0030148
negative regulation of myeloid cell differentiation	Gene Ontology	GO:0045638	2	15	0.128957	0.399929	DLL1	CTR9	http://amigo.geneontology.org/amigo/term/GO:0045638
male genitalia development	Gene Ontology	GO:0030539	2	15	0.128957	0.399929	CTNNB1	TBX3	http://amigo.geneontology.org/amigo/term/GO:0030539
protein localization to Golgi apparatus	Gene Ontology	GO:0034067	2	15	0.128957	0.399929	PAQR3	OPTN	http://amigo.geneontology.org/amigo/term/GO:0034067
dendrite cytoplasm	Gene Ontology	GO:0032839	2	15	0.128957	0.399929	SFPQ	SOD1	http://amigo.geneontology.org/amigo/term/GO:0032839
nuclear euchromatin	Gene Ontology	GO:0005719	2	15	0.128957	0.399929	CTNNB1	TCF7	http://amigo.geneontology.org/amigo/term/GO:0005719
NuA4 histone acetyltransferase complex	Gene Ontology	GO:0035267	2	15	0.128957	0.399929	ING3	MSL3	http://amigo.geneontology.org/amigo/term/GO:0035267
disordered domain specific binding	Gene Ontology	GO:0097718	2	15	0.128957	0.399929	CTNNB1	RB1	http://amigo.geneontology.org/amigo/term/GO:0097718
cellular response to vascular endothelial growth factor stimulus	Gene Ontology	GO:0035924	2	15	0.128957	0.399929	RELA	DLL4	http://amigo.geneontology.org/amigo/term/GO:0035924
SWI/SNF complex	Gene Ontology	GO:0016514	2	15	0.128957	0.399929	SMARCC2	SMARCC1	http://amigo.geneontology.org/amigo/term/GO:0016514
protein N-linked glycosylation via asparagine	Gene Ontology	GO:0018279	2	15	0.128957	0.399929	FUT8	UGGT1	http://amigo.geneontology.org/amigo/term/GO:0018279
protein import into mitochondrial matrix	Gene Ontology	GO:0030150	2	15	0.128957	0.399929	GRPEL2	TOMM20	http://amigo.geneontology.org/amigo/term/GO:0030150
phosphatidylinositol-3-phosphatase activity	Gene Ontology	GO:0004438	2	15	0.128957	0.399929	MTMR4	MTMR10	http://amigo.geneontology.org/amigo/term/GO:0004438
protein localization to centrosome	Gene Ontology	GO:0071539	2	15	0.128957	0.399929	PCM1	STIL	http://amigo.geneontology.org/amigo/term/GO:0071539
NAD+ kinase activity	Gene Ontology	GO:0003951	2	15	0.128957	0.399929	AGK	DGKE	http://amigo.geneontology.org/amigo/term/GO:0003951
metanephros development	Gene Ontology	GO:0001656	2	15	0.128957	0.399929	ITGA8	APH1A	http://amigo.geneontology.org/amigo/term/GO:0001656
protein targeting to vacuole	Gene Ontology	GO:0006623	2	15	0.128957	0.399929	VPS37C	VPS37A	http://amigo.geneontology.org/amigo/term/GO:0006623
regulation of cell differentiation	Gene Ontology	GO:0045595	2	15	0.128957	0.399929	PTBP1	PLEKHB2	http://amigo.geneontology.org/amigo/term/GO:0045595
neuroblast proliferation	Gene Ontology	GO:0007405	2	15	0.128957	0.399929	DAGLA	PLXNB2	http://amigo.geneontology.org/amigo/term/GO:0007405
positive regulation of mRNA splicing, via spliceosome	Gene Ontology	GO:0048026	2	15	0.128957	0.399929	DAZAP1	NUP98	http://amigo.geneontology.org/amigo/term/GO:0048026
vacuolar membrane	Gene Ontology	GO:0005774	2	15	0.128957	0.399929	MAN2B2	ARL8BL	http://amigo.geneontology.org/amigo/term/GO:0005774
protein N-linked glycosylation	Gene Ontology	GO:0006487	3	31	0.129856	0.399986	DOLPP1	MGAT4A	FUT8	http://amigo.geneontology.org/amigo/term/GO:0006487
hormone-mediated signaling pathway	Gene Ontology	GO:0009755	3	31	0.129856	0.399986	PPARD	PTPN11	LATS1	http://amigo.geneontology.org/amigo/term/GO:0009755
cytoplasmic translation	Gene Ontology	GO:0002181	3	31	0.129856	0.399986	RPL36	RPLP0	EIF4H	http://amigo.geneontology.org/amigo/term/GO:0002181
regulation of protein localization	Gene Ontology	GO:0032880	3	31	0.129856	0.399986	UFL1	MMD	DNAJB6	http://amigo.geneontology.org/amigo/term/GO:0032880
mRNA splicing, via spliceosome	Gene Ontology	GO:0000398	6	87	0.130261	0.40078	RBM6	EFTUD2	CHUK	SPEN	SFPQ	ZMAT2	http://amigo.geneontology.org/amigo/term/GO:0000398
cadherin binding	Gene Ontology	GO:0045296	4	49	0.132017	0.403903	CTNNB1	PTPN11	PKP4	CTNNAL1	http://amigo.geneontology.org/amigo/term/GO:0045296
protease binding	Gene Ontology	GO:0002020	4	49	0.132017	0.403903	VWF	ITGA3	THAP5	CASP8AP2	http://amigo.geneontology.org/amigo/term/GO:0002020
cysteine-type endopeptidase activity	Gene Ontology	GO:0004197	4	49	0.132017	0.403903	CTSO	USP16	USP40	USP20	http://amigo.geneontology.org/amigo/term/GO:0004197
anion transmembrane transport	Gene Ontology	GO:0098656	3	32	0.138352	0.41935	VDAC3	SLC9A9	SLC4A2	http://amigo.geneontology.org/amigo/term/GO:0098656
endoplasmic reticulum unfolded protein response	Gene Ontology	GO:0030968	3	32	0.138352	0.41935	CREB3L2	HERPUD1	CLGN	http://amigo.geneontology.org/amigo/term/GO:0030968
negative regulation of I-kappaB kinase/NF-kappaB signaling	Gene Ontology	GO:0043124	3	32	0.138352	0.41935	OTUD7B	OPTN	NLRC3	http://amigo.geneontology.org/amigo/term/GO:0043124
regulation of autophagy	Gene Ontology	GO:0010506	3	32	0.138352	0.41935	RRAGD	MTMR4	GPR137B	http://amigo.geneontology.org/amigo/term/GO:0010506
platelet activation	Gene Ontology	GO:0030168	2	16	0.14168	0.41935	VWF	ENTPD2	http://amigo.geneontology.org/amigo/term/GO:0030168
erythrocyte development	Gene Ontology	GO:0048821	2	16	0.14168	0.41935	RHAG	SH2B3	http://amigo.geneontology.org/amigo/term/GO:0048821
insulin receptor binding	Gene Ontology	GO:0005158	2	16	0.14168	0.41935	PTPN11	SNX4	http://amigo.geneontology.org/amigo/term/GO:0005158
mitochondrion morphogenesis	Gene Ontology	GO:0070584	2	16	0.14168	0.41935	PNPT1	NUBPL	http://amigo.geneontology.org/amigo/term/GO:0070584
mitotic cell cycle checkpoint	Gene Ontology	GO:0007093	2	16	0.14168	0.41935	INTS3	NABP2	http://amigo.geneontology.org/amigo/term/GO:0007093
ubiquitin-like protein ligase binding	Gene Ontology	GO:0044389	2	16	0.14168	0.41935	STAM	PRR7	http://amigo.geneontology.org/amigo/term/GO:0044389
ribosome biogenesis	Gene Ontology	GO:0042254	2	16	0.14168	0.41935	MRPL10	PRKDC	http://amigo.geneontology.org/amigo/term/GO:0042254
RNA polymerase III complex	Gene Ontology	GO:0005666	2	16	0.14168	0.41935	CRCP	POLR2H	http://amigo.geneontology.org/amigo/term/GO:0005666
gene expression	Gene Ontology	GO:0010467	2	16	0.14168	0.41935	HOXA3	NOX4	http://amigo.geneontology.org/amigo/term/GO:0010467
regulation of I-kappaB kinase/NF-kappaB signaling	Gene Ontology	GO:0043122	2	16	0.14168	0.41935	UFL1	OPTN	http://amigo.geneontology.org/amigo/term/GO:0043122
negative regulation of extrinsic apoptotic signaling pathway in absence of ligand	Gene Ontology	GO:2001240	2	16	0.14168	0.41935	ZC3HC1	SGK3	http://amigo.geneontology.org/amigo/term/GO:2001240
four-way junction DNA binding	Gene Ontology	GO:0000400	2	16	0.14168	0.41935	WRN	XRCC3	http://amigo.geneontology.org/amigo/term/GO:0000400
protein kinase activator activity	Gene Ontology	GO:0030295	2	16	0.14168	0.41935	PIK3CA	PRKAG2	http://amigo.geneontology.org/amigo/term/GO:0030295
positive regulation of apoptotic signaling pathway	Gene Ontology	GO:2001235	2	16	0.14168	0.41935	ING5	TRAF7	http://amigo.geneontology.org/amigo/term/GO:2001235
negative regulation of microtubule depolymerization	Gene Ontology	GO:0007026	2	16	0.14168	0.41935	FSD1	CLASP1	http://amigo.geneontology.org/amigo/term/GO:0007026
sarcoplasmic reticulum	Gene Ontology	GO:0016529	2	16	0.14168	0.41935	JPH1	ITPR1	http://amigo.geneontology.org/amigo/term/GO:0016529
antimicrobial humoral immune response mediated by antimicrobial peptide	Gene Ontology	GO:0061844	2	16	0.14168	0.41935	GNLY	FAU	http://amigo.geneontology.org/amigo/term/GO:0061844
cellular response to amyloid-beta	Gene Ontology	GO:1904646	2	16	0.14168	0.41935	CACNB1	ABCC1	http://amigo.geneontology.org/amigo/term/GO:1904646
arachidonic acid secretion	Gene Ontology	GO:0050482	2	16	0.14168	0.41935	PNPLA8	PLA2G2E	http://amigo.geneontology.org/amigo/term/GO:0050482
enzyme activator activity	Gene Ontology	GO:0008047	2	16	0.14168	0.41935	ALOX5AP	WRNIP1	http://amigo.geneontology.org/amigo/term/GO:0008047
podosome	Gene Ontology	GO:0002102	2	16	0.14168	0.41935	LPXN	SCIN	http://amigo.geneontology.org/amigo/term/GO:0002102
ATPase activator activity	Gene Ontology	GO:0001671	2	16	0.14168	0.41935	DNAJA2	DNAJB6	http://amigo.geneontology.org/amigo/term/GO:0001671
female gonad development	Gene Ontology	GO:0008585	2	16	0.14168	0.41935	FANCA	NUP107	http://amigo.geneontology.org/amigo/term/GO:0008585
negative regulation of peptidyl-serine phosphorylation	Gene Ontology	GO:0033137	2	16	0.14168	0.41935	MLXIPL	PAQR3	http://amigo.geneontology.org/amigo/term/GO:0033137
positive regulation of cell population proliferation	Gene Ontology	GO:0008284	12	217	0.143623	0.424639	ERBB2	TIPIN	MLXIPL	KMT2D	TBX3	RPS15A	DLL1	EZH2	HOXA3	CCPG1	RELA	CRIP2	http://amigo.geneontology.org/amigo/term/GO:0008284
activation of GTPase activity	Gene Ontology	GO:0090630	5	70	0.14434	0.425374	TBC1D9	EVI5	SDC4	TNFAIP1	CORO1C	http://amigo.geneontology.org/amigo/term/GO:0090630
thiol-dependent ubiquitin-specific protease activity	Gene Ontology	GO:0004843	5	70	0.14434	0.425374	OTUD7B	USP20	USP16	USP40	COPS5	http://amigo.geneontology.org/amigo/term/GO:0004843
retrograde transport, endosome to Golgi	Gene Ontology	GO:0042147	4	51	0.145463	0.426839	CLTCL1	HEATR5B	TMEM87A	EVI5	http://amigo.geneontology.org/amigo/term/GO:0042147
ruffle	Gene Ontology	GO:0001726	4	51	0.145463	0.426839	APPL1	CLIP1	MYH9	RAB5A	http://amigo.geneontology.org/amigo/term/GO:0001726
canonical Wnt signaling pathway	Gene Ontology	GO:0060070	4	51	0.145463	0.426839	RECK	MED12	LRP6	TCF7	http://amigo.geneontology.org/amigo/term/GO:0060070
positive regulation of MAPK cascade	Gene Ontology	GO:0043410	4	51	0.145463	0.426839	ERBB2	CTNNB1	BANK1	CDK10	http://amigo.geneontology.org/amigo/term/GO:0043410
intracellular signal transduction	Gene Ontology	GO:0035556	13	240	0.146484	0.428209	ICK	SGK3	MCF2	PRKAG2	MCF2L	PASK	LATS1	SH2B3	LCP2	TNS2	NLK	STK38L	DGKE	http://amigo.geneontology.org/amigo/term/GO:0035556
peptidyl-prolyl cis-trans isomerase activity	Gene Ontology	GO:0003755	3	33	0.14703	0.428209	PPIG	PPIF	NKTR	http://amigo.geneontology.org/amigo/term/GO:0003755
protein peptidyl-prolyl isomerization	Gene Ontology	GO:0000413	3	33	0.14703	0.428209	PPIG	PPIF	NKTR	http://amigo.geneontology.org/amigo/term/GO:0000413
phosphatidylinositol-3-phosphate binding	Gene Ontology	GO:0032266	3	33	0.14703	0.428209	ZFYVE19	HIP1	VPS36	http://amigo.geneontology.org/amigo/term/GO:0032266
presynaptic membrane	Gene Ontology	GO:0042734	3	33	0.14703	0.428209	CTNNB1	SNAP91	GRIN2A	http://amigo.geneontology.org/amigo/term/GO:0042734
transport	Gene Ontology	GO:0006810	3	33	0.14703	0.428209	SLC6A9	CNNM4	TMEM87A	http://amigo.geneontology.org/amigo/term/GO:0006810
transcription repressor complex	Gene Ontology	GO:0017053	3	33	0.14703	0.428209	SPEN	CTBP1	SP3	http://amigo.geneontology.org/amigo/term/GO:0017053
positive regulation of NF-kappaB transcription factor activity	Gene Ontology	GO:0051092	5	71	0.15013	0.436307	IL18	RELA	IL18R1	IL18RAP	CHUK	http://amigo.geneontology.org/amigo/term/GO:0051092
endoplasmic reticulum to Golgi vesicle-mediated transport	Gene Ontology	GO:0006888	5	71	0.15013	0.436307	CREB3L2	ERGIC2	SAR1B	TRAPPC5	MPPE1	http://amigo.geneontology.org/amigo/term/GO:0006888
regulation of small GTPase mediated signal transduction	Gene Ontology	GO:0051056	2	17	0.154655	0.438698	SIPA1L1	ARHGAP28	http://amigo.geneontology.org/amigo/term/GO:0051056
amino acid transmembrane transporter activity	Gene Ontology	GO:0015171	2	17	0.154655	0.438698	SLC36A4	SLC38A6	http://amigo.geneontology.org/amigo/term/GO:0015171
rRNA binding	Gene Ontology	GO:0019843	2	17	0.154655	0.438698	DIEXF	RPF2	http://amigo.geneontology.org/amigo/term/GO:0019843
homologous chromosome pairing at meiosis	Gene Ontology	GO:0007129	2	17	0.154655	0.438698	NAIF1	FANCD2	http://amigo.geneontology.org/amigo/term/GO:0007129
positive regulation of transforming growth factor beta receptor signaling pathway	Gene Ontology	GO:0030511	2	17	0.154655	0.438698	ITGA8	ING2	http://amigo.geneontology.org/amigo/term/GO:0030511
negative regulation of cyclin-dependent protein serine/threonine kinase activity	Gene Ontology	GO:0045736	2	17	0.154655	0.438698	LATS1	NR2F2	http://amigo.geneontology.org/amigo/term/GO:0045736
NADP binding	Gene Ontology	GO:0050661	2	17	0.154655	0.438698	FMO3	NDOR1	http://amigo.geneontology.org/amigo/term/GO:0050661
helicase activity	Gene Ontology	GO:0004386	2	17	0.154655	0.438698	DDX49	DHX37	http://amigo.geneontology.org/amigo/term/GO:0004386
cell death	Gene Ontology	GO:0008219	2	17	0.154655	0.438698	NDOR1	PNPLA8	http://amigo.geneontology.org/amigo/term/GO:0008219
positive regulation of neuroblast proliferation	Gene Ontology	GO:0002052	2	17	0.154655	0.438698	CTNNB1	ASPM	http://amigo.geneontology.org/amigo/term/GO:0002052
neuromuscular synaptic transmission	Gene Ontology	GO:0007274	2	17	0.154655	0.438698	ADARB1	TSPOAP1	http://amigo.geneontology.org/amigo/term/GO:0007274
negative regulation of insulin secretion	Gene Ontology	GO:0046676	2	17	0.154655	0.438698	CHGA	PTPN11	http://amigo.geneontology.org/amigo/term/GO:0046676
positive regulation of extrinsic apoptotic signaling pathway	Gene Ontology	GO:2001238	2	17	0.154655	0.438698	BID	AGT	http://amigo.geneontology.org/amigo/term/GO:2001238
NADH dehydrogenase (ubiquinone) activity	Gene Ontology	GO:0008137	2	17	0.154655	0.438698	NDUFS1	NDUFS2	http://amigo.geneontology.org/amigo/term/GO:0008137
positive regulation of cell cycle arrest	Gene Ontology	GO:0071158	2	17	0.154655	0.438698	BRCA1	ZBTB17	http://amigo.geneontology.org/amigo/term/GO:0071158
thyroid gland development	Gene Ontology	GO:0030878	2	17	0.154655	0.438698	HHEX	HOXA3	http://amigo.geneontology.org/amigo/term/GO:0030878
negative regulation of stress fiber assembly	Gene Ontology	GO:0051497	2	17	0.154655	0.438698	ARHGAP28	CLASP1	http://amigo.geneontology.org/amigo/term/GO:0051497
negative regulation of Rho protein signal transduction	Gene Ontology	GO:0035024	2	17	0.154655	0.438698	ITGA3	TNFAIP1	http://amigo.geneontology.org/amigo/term/GO:0035024
cardiac muscle contraction	Gene Ontology	GO:0060048	2	17	0.154655	0.438698	MTOR	TAZ	http://amigo.geneontology.org/amigo/term/GO:0060048
negative regulation of chondrocyte differentiation	Gene Ontology	GO:0032331	2	17	0.154655	0.438698	CTNNB1	PTPN11	http://amigo.geneontology.org/amigo/term/GO:0032331
response to cytokine	Gene Ontology	GO:0034097	2	17	0.154655	0.438698	ACP5	RELA	http://amigo.geneontology.org/amigo/term/GO:0034097
negative regulation of viral genome replication	Gene Ontology	GO:0045071	2	17	0.154655	0.438698	RNASEL	ILF3	http://amigo.geneontology.org/amigo/term/GO:0045071
response to ischemia	Gene Ontology	GO:0002931	2	17	0.154655	0.438698	PANX1	PPIF	http://amigo.geneontology.org/amigo/term/GO:0002931
cell redox homeostasis	Gene Ontology	GO:0045454	3	34	0.155879	0.439428	PDIA6	GLRX2	TXNDC12	http://amigo.geneontology.org/amigo/term/GO:0045454
kinase activity	Gene Ontology	GO:0016301	3	34	0.155879	0.439428	CKB	NMRK2	UCKL1	http://amigo.geneontology.org/amigo/term/GO:0016301
mitochondrial respiratory chain complex I	Gene Ontology	GO:0005747	3	34	0.155879	0.439428	NDUFV3	NDUFS1	NDUFS2	http://amigo.geneontology.org/amigo/term/GO:0005747
cholesterol binding	Gene Ontology	GO:0015485	3	34	0.155879	0.439428	STARD3	STARD3NL	ERLIN2	http://amigo.geneontology.org/amigo/term/GO:0015485
somitogenesis	Gene Ontology	GO:0001756	3	34	0.155879	0.439428	ABI1	LFNG	PRKDC	http://amigo.geneontology.org/amigo/term/GO:0001756
protein import into nucleus	Gene Ontology	GO:0006606	4	53	0.159417	0.445462	PHB2	APPL1	NUP214	NUP107	http://amigo.geneontology.org/amigo/term/GO:0006606
positive regulation of cold-induced thermogenesis	Gene Ontology	GO:0120162	4	53	0.159417	0.445462	OGT	DECR1	EPAS1	ADRB1	http://amigo.geneontology.org/amigo/term/GO:0120162
ubiquitin binding	Gene Ontology	GO:0043130	4	53	0.159417	0.445462	GGA3	UBXN7	USP16	VPS36	http://amigo.geneontology.org/amigo/term/GO:0043130
caveola	Gene Ontology	GO:0005901	3	35	0.164889	0.445462	LRP6	EHD2	TFPI	http://amigo.geneontology.org/amigo/term/GO:0005901
mediator complex	Gene Ontology	GO:0016592	3	35	0.164889	0.445462	MED19	MED12	MED16	http://amigo.geneontology.org/amigo/term/GO:0016592
extrinsic component of membrane	Gene Ontology	GO:0019898	3	35	0.164889	0.445462	BLOC1S6	UBXN6	EHD2	http://amigo.geneontology.org/amigo/term/GO:0019898
RNA splicing	Gene Ontology	GO:0008380	3	35	0.164889	0.445462	KHDRBS1	SRSF11	THOC5	http://amigo.geneontology.org/amigo/term/GO:0008380
postsynaptic density	Gene Ontology	GO:0014069	7	115	0.166325	0.445462	PPP1R9B	DLG5	ITPR1	RTN4	RPLP0	PKP4	NETO2	http://amigo.geneontology.org/amigo/term/GO:0014069
nuclear matrix	Gene Ontology	GO:0016363	4	54	0.166571	0.445462	PHB2	CENPF	SFPQ	DCAF7	http://amigo.geneontology.org/amigo/term/GO:0016363
developmental growth	Gene Ontology	GO:0048589	2	18	0.167844	0.445462	ASPM	EIF4H	http://amigo.geneontology.org/amigo/term/GO:0048589
neural tube development	Gene Ontology	GO:0021915	2	18	0.167844	0.445462	AMBRA1	TCF7	http://amigo.geneontology.org/amigo/term/GO:0021915
positive regulation of DNA repair	Gene Ontology	GO:0045739	2	18	0.167844	0.445462	BRCA1	UBXN7	http://amigo.geneontology.org/amigo/term/GO:0045739
regulation of mitochondrial membrane potential	Gene Ontology	GO:0051881	2	18	0.167844	0.445462	NDUFS1	SOD1	http://amigo.geneontology.org/amigo/term/GO:0051881
metalloaminopeptidase activity	Gene Ontology	GO:0070006	2	18	0.167844	0.445462	LTA4H	NPEPPS	http://amigo.geneontology.org/amigo/term/GO:0070006
RNA polymerase II core promoter sequence-specific DNA binding	Gene Ontology	GO:0000979	2	18	0.167844	0.445462	RELA	EZH2	http://amigo.geneontology.org/amigo/term/GO:0000979
inorganic anion transport	Gene Ontology	GO:0015698	2	18	0.167844	0.445462	VDAC3	SLC4A2	http://amigo.geneontology.org/amigo/term/GO:0015698
dynein light intermediate chain binding	Gene Ontology	GO:0051959	2	18	0.167844	0.445462	RAB11FIP3	CCDC88C	http://amigo.geneontology.org/amigo/term/GO:0051959
cell projection assembly	Gene Ontology	GO:0030031	2	18	0.167844	0.445462	PARVB	SCIN	http://amigo.geneontology.org/amigo/term/GO:0030031
histone acetyltransferase complex	Gene Ontology	GO:0000123	2	18	0.167844	0.445462	OGT	MSL3	http://amigo.geneontology.org/amigo/term/GO:0000123
positive regulation of protein kinase activity	Gene Ontology	GO:0045860	2	18	0.167844	0.445462	MMD	LCP2	http://amigo.geneontology.org/amigo/term/GO:0045860
monooxygenase activity	Gene Ontology	GO:0004497	2	18	0.167844	0.445462	FMO3	CYP4B7	http://amigo.geneontology.org/amigo/term/GO:0004497
RNA methylation	Gene Ontology	GO:0001510	2	18	0.167844	0.445462	TRMT2A	METTL4	http://amigo.geneontology.org/amigo/term/GO:0001510
T cell homeostasis	Gene Ontology	GO:0043029	2	18	0.167844	0.445462	SLC39A3	RC3H2	http://amigo.geneontology.org/amigo/term/GO:0043029
receptor tyrosine kinase binding	Gene Ontology	GO:0030971	3	36	0.174048	0.445462	PTPN11	DAZAP2	ELMO2	http://amigo.geneontology.org/amigo/term/GO:0030971
regulation of circadian rhythm	Gene Ontology	GO:0042752	3	36	0.174048	0.445462	DDB1	EZH2	PRKDC	http://amigo.geneontology.org/amigo/term/GO:0042752
neuron migration	Gene Ontology	GO:0001764	5	75	0.174226	0.445462	CTNNB1	ASPM	ITGA3	TOP2B	NR2F2	http://amigo.geneontology.org/amigo/term/GO:0001764
intracellular protein transport	Gene Ontology	GO:0006886	11	204	0.174569	0.445462	TBC1D9	RAB5A	SYTL2	TNFAIP1	RAB18	GGA3	CLTCL1	EVI5	RAB24	SAR1B	STX8	http://amigo.geneontology.org/amigo/term/GO:0006886
peroxisome	Gene Ontology	GO:0005777	4	56	0.18121	0.445462	AGXT	ABCD2	BAAT	SOD1	http://amigo.geneontology.org/amigo/term/GO:0005777
carbohydrate binding	Gene Ontology	GO:0030246	4	56	0.18121	0.445462	CLEC3B	LGALS8	MAN2B2	GUSB	http://amigo.geneontology.org/amigo/term/GO:0030246
regulation of protein phosphorylation	Gene Ontology	GO:0001932	2	19	0.181215	0.445462	PLXNB2	CCDC88C	http://amigo.geneontology.org/amigo/term/GO:0001932
bone morphogenesis	Gene Ontology	GO:0060349	2	19	0.181215	0.445462	GLG1	ACP5	http://amigo.geneontology.org/amigo/term/GO:0060349
cullin family protein binding	Gene Ontology	GO:0097602	2	19	0.181215	0.445462	DDB1	KCTD17	http://amigo.geneontology.org/amigo/term/GO:0097602
intraciliary transport	Gene Ontology	GO:0042073	2	19	0.181215	0.445462	ICK	IFT57	http://amigo.geneontology.org/amigo/term/GO:0042073
regulation of lipid metabolic process	Gene Ontology	GO:0019216	2	19	0.181215	0.445462	PPARD	PSAP	http://amigo.geneontology.org/amigo/term/GO:0019216
anaphase-promoting complex	Gene Ontology	GO:0005680	2	19	0.181215	0.445462	MAD2L2	UBE2S	http://amigo.geneontology.org/amigo/term/GO:0005680
MLL1 complex	Gene Ontology	GO:0071339	2	19	0.181215	0.445462	TAF6	MGA	http://amigo.geneontology.org/amigo/term/GO:0071339
RNA polymerase II general transcription initiation factor activity	Gene Ontology	GO:0016251	2	19	0.181215	0.445462	TAF6	GTF2E1	http://amigo.geneontology.org/amigo/term/GO:0016251
meiotic cell cycle	Gene Ontology	GO:0051321	2	19	0.181215	0.445462	STK35	TUBGCP5	http://amigo.geneontology.org/amigo/term/GO:0051321
cellular response to glucose stimulus	Gene Ontology	GO:0071333	2	19	0.181215	0.445462	PIK3CA	NOX4	http://amigo.geneontology.org/amigo/term/GO:0071333
positive regulation of telomerase activity	Gene Ontology	GO:0051973	2	19	0.181215	0.445462	CTNNB1	POT1	http://amigo.geneontology.org/amigo/term/GO:0051973
regulation of endocytosis	Gene Ontology	GO:0030100	2	19	0.181215	0.445462	RAB5A	PACSIN3	http://amigo.geneontology.org/amigo/term/GO:0030100
intrinsic apoptotic signaling pathway in response to endoplasmic reticulum stress	Gene Ontology	GO:0070059	2	19	0.181215	0.445462	ITPR1	ATP2A3	http://amigo.geneontology.org/amigo/term/GO:0070059
actin-dependent ATPase activity	Gene Ontology	GO:0030898	2	19	0.181215	0.445462	MYH11	MYH9	http://amigo.geneontology.org/amigo/term/GO:0030898
condensed chromosome	Gene Ontology	GO:0000793	2	19	0.181215	0.445462	SMARCA5	FANCD2	http://amigo.geneontology.org/amigo/term/GO:0000793
regulation of immune response	Gene Ontology	GO:0050776	2	19	0.181215	0.445462	SPPL2A	IRF1	http://amigo.geneontology.org/amigo/term/GO:0050776
mRNA 5'-UTR binding	Gene Ontology	GO:0048027	2	19	0.181215	0.445462	UTP23	DHX36	http://amigo.geneontology.org/amigo/term/GO:0048027
chromatin silencing	Gene Ontology	GO:0006342	2	19	0.181215	0.445462	CTBP1	MSL3	http://amigo.geneontology.org/amigo/term/GO:0006342
nucleotide binding	Gene Ontology	GO:0000166	3	37	0.183346	0.445462	CRCP	MRPL39	NT5C3B	http://amigo.geneontology.org/amigo/term/GO:0000166
intracellular anatomical structure	Gene Ontology	GO:0005622	3	37	0.183346	0.445462	ABI1	DHX36	DHX37	http://amigo.geneontology.org/amigo/term/GO:0005622
positive regulation of protein ubiquitination	Gene Ontology	GO:0031398	3	37	0.183346	0.445462	BRCA1	RASSF5	PAXIP1	http://amigo.geneontology.org/amigo/term/GO:0031398
B cell differentiation	Gene Ontology	GO:0030183	3	37	0.183346	0.445462	HHEX	SP3	FLT3	http://amigo.geneontology.org/amigo/term/GO:0030183
flagellated sperm motility	Gene Ontology	GO:0030317	3	37	0.183346	0.445462	INPP5B	TTLL9	ING2	http://amigo.geneontology.org/amigo/term/GO:0030317
immune response	Gene Ontology	GO:0006955	6	98	0.187619	0.445462	IL18	BLB1	TNFAIP1	ENPP2	BF2	BF1	http://amigo.geneontology.org/amigo/term/GO:0006955
response to hypoxia	Gene Ontology	GO:0001666	4	57	0.188684	0.445462	PLOD2	ITPR1	VEGFA	HSP90B1	http://amigo.geneontology.org/amigo/term/GO:0001666
endosome membrane	Gene Ontology	GO:0010008	4	57	0.188684	0.445462	ERBB2	APPL1	ARHGAP1	CORO1C	http://amigo.geneontology.org/amigo/term/GO:0010008
microtubule-based movement	Gene Ontology	GO:0007018	4	57	0.188684	0.445462	DYNC1I2	KIF11	DYNC1LI2	KIFC3	http://amigo.geneontology.org/amigo/term/GO:0007018
DNA replication	Gene Ontology	GO:0006260	3	38	0.192772	0.445462	TNFAIP1	RFC1	CHAF1B	http://amigo.geneontology.org/amigo/term/GO:0006260
cellular response to oxidative stress	Gene Ontology	GO:0034599	3	38	0.192772	0.445462	PNPT1	PARP1	FANCD2	http://amigo.geneontology.org/amigo/term/GO:0034599
protein processing	Gene Ontology	GO:0016485	3	38	0.192772	0.445462	OGT	APH1A	PITRM1	http://amigo.geneontology.org/amigo/term/GO:0016485
cytokine receptor activity	Gene Ontology	GO:0004896	3	38	0.192772	0.445462	IFNAR2	IFNGR2	IL2RG	http://amigo.geneontology.org/amigo/term/GO:0004896
G protein-coupled receptor binding	Gene Ontology	GO:0001664	3	38	0.192772	0.445462	ARHGEF11	GNAI3	USP20	http://amigo.geneontology.org/amigo/term/GO:0001664
exocytic vesicle	Gene Ontology	GO:0070382	2	20	0.194735	0.445462	UNC13D	SYTL2	http://amigo.geneontology.org/amigo/term/GO:0070382
hyaluronic acid binding	Gene Ontology	GO:0005540	2	20	0.194735	0.445462	STAB1	STAB2	http://amigo.geneontology.org/amigo/term/GO:0005540
macroautophagy	Gene Ontology	GO:0016236	2	20	0.194735	0.445462	MAP1LC3A	UBXN6	http://amigo.geneontology.org/amigo/term/GO:0016236
endoplasmic reticulum exit site	Gene Ontology	GO:0070971	2	20	0.194735	0.445462	SAR1B	MPPE1	http://amigo.geneontology.org/amigo/term/GO:0070971
positive regulation of macroautophagy	Gene Ontology	GO:0016239	2	20	0.194735	0.445462	RAB12	GNAI3	http://amigo.geneontology.org/amigo/term/GO:0016239
microfilament motor activity	Gene Ontology	GO:0000146	2	20	0.194735	0.445462	MYH11	MYH9	http://amigo.geneontology.org/amigo/term/GO:0000146
nuclear inner membrane	Gene Ontology	GO:0005637	2	20	0.194735	0.445462	ITPR1	DPY19L4	http://amigo.geneontology.org/amigo/term/GO:0005637
iron ion homeostasis	Gene Ontology	GO:0055072	2	20	0.194735	0.445462	EPAS1	FBXL5	http://amigo.geneontology.org/amigo/term/GO:0055072
positive regulation of telomere maintenance via telomerase	Gene Ontology	GO:0032212	2	20	0.194735	0.445462	CTNNB1	POT1	http://amigo.geneontology.org/amigo/term/GO:0032212
negative regulation of intrinsic apoptotic signaling pathway	Gene Ontology	GO:2001243	2	20	0.194735	0.445462	PPIF	URI1	http://amigo.geneontology.org/amigo/term/GO:2001243
growth factor binding	Gene Ontology	GO:0019838	2	20	0.194735	0.445462	ERBB2	FLT3	http://amigo.geneontology.org/amigo/term/GO:0019838
Notch binding	Gene Ontology	GO:0005112	2	20	0.194735	0.445462	DLL1	DLL4	http://amigo.geneontology.org/amigo/term/GO:0005112
protein localization to cell surface	Gene Ontology	GO:0034394	2	20	0.194735	0.445462	CTNNB1	GGA3	http://amigo.geneontology.org/amigo/term/GO:0034394
cell-cell junction	Gene Ontology	GO:0005911	6	100	0.198972	0.445462	LAMA1	ACTN4	PKP4	MAGI1	LCP2	SH3KBP1	http://amigo.geneontology.org/amigo/term/GO:0005911
regulation of transcription by RNA polymerase II	Gene Ontology	GO:0006357	19	396	0.200361	0.445462	UBP1	IRF2	IRF1	HSF2	ZBTB17	HNF4beta	ARID5A	GTF2E1	MLXIPL	ASCL3	RB1	NR2F2	MED12	ABCA2	CCNT1	MYEF2	EPAS1	MDM4	ATF2	http://amigo.geneontology.org/amigo/term/GO:0006357
cell adhesion	Gene Ontology	GO:0007155	9	166	0.200985	0.445462	ITGA8	LAMA1	STAB1	STAB2	ALCAM	ITGA3	NRXN1	CTNNAL1	NCAM1	http://amigo.geneontology.org/amigo/term/GO:0007155
cell cycle arrest	Gene Ontology	GO:0007050	3	39	0.202315	0.445462	RASSF1	CDKN3	RB1	http://amigo.geneontology.org/amigo/term/GO:0007050
liver development	Gene Ontology	GO:0001889	3	39	0.202315	0.445462	PIK3CA	RELA	SP3	http://amigo.geneontology.org/amigo/term/GO:0001889
cytoplasmic microtubule organization	Gene Ontology	GO:0031122	3	39	0.202315	0.445462	CLIP1	CCDC88C	TUBGCP5	http://amigo.geneontology.org/amigo/term/GO:0031122
RNA phosphodiester bond hydrolysis, endonucleolytic	Gene Ontology	GO:0090502	3	39	0.202315	0.445462	LACTB2	RNASET2	RNASEH2B	http://amigo.geneontology.org/amigo/term/GO:0090502
endosomal transport	Gene Ontology	GO:0016197	3	39	0.202315	0.445462	CORO1C	EHD2	ARHGAP1	http://amigo.geneontology.org/amigo/term/GO:0016197
memory	Gene Ontology	GO:0007613	3	39	0.202315	0.445462	ITGA8	ITGA3	GRIN2A	http://amigo.geneontology.org/amigo/term/GO:0007613
CENP-A containing nucleosome assembly	Gene Ontology	GO:0034080	1	5	0.202378	0.445462	NASP	http://amigo.geneontology.org/amigo/term/GO:0034080
positive regulation of cell-cell adhesion mediated by cadherin	Gene Ontology	GO:2000049	1	5	0.202378	0.445462	FLOT1	http://amigo.geneontology.org/amigo/term/GO:2000049
male germ cell nucleus	Gene Ontology	GO:0001673	1	5	0.202378	0.445462	TOPBP1	http://amigo.geneontology.org/amigo/term/GO:0001673
clathrin complex	Gene Ontology	GO:0071439	1	5	0.202378	0.445462	CLTCL1	http://amigo.geneontology.org/amigo/term/GO:0071439
complement receptor mediated signaling pathway	Gene Ontology	GO:0002430	1	5	0.202378	0.445462	GPLD1	http://amigo.geneontology.org/amigo/term/GO:0002430
positive regulation of mast cell chemotaxis	Gene Ontology	GO:0060754	1	5	0.202378	0.445462	VEGFA	http://amigo.geneontology.org/amigo/term/GO:0060754
kinetochore organization	Gene Ontology	GO:0051383	1	5	0.202378	0.445462	NDC80	http://amigo.geneontology.org/amigo/term/GO:0051383
L-alanine transmembrane transporter activity	Gene Ontology	GO:0015180	1	5	0.202378	0.445462	SLC36A4	http://amigo.geneontology.org/amigo/term/GO:0015180
Piccolo NuA4 histone acetyltransferase complex	Gene Ontology	GO:0032777	1	5	0.202378	0.445462	ING3	http://amigo.geneontology.org/amigo/term/GO:0032777
importin-alpha family protein binding	Gene Ontology	GO:0061676	1	5	0.202378	0.445462	RB1	http://amigo.geneontology.org/amigo/term/GO:0061676
Tat protein binding	Gene Ontology	GO:0030957	1	5	0.202378	0.445462	DLL1	http://amigo.geneontology.org/amigo/term/GO:0030957
oxoglutarate dehydrogenase complex	Gene Ontology	GO:0045252	1	5	0.202378	0.445462	DLST	http://amigo.geneontology.org/amigo/term/GO:0045252
glucokinase activity	Gene Ontology	GO:0004340	1	5	0.202378	0.445462	HK2	http://amigo.geneontology.org/amigo/term/GO:0004340
acetyl-CoA biosynthetic process	Gene Ontology	GO:0006085	1	5	0.202378	0.445462	ACLY	http://amigo.geneontology.org/amigo/term/GO:0006085
L-proline transmembrane transporter activity	Gene Ontology	GO:0015193	1	5	0.202378	0.445462	SLC36A4	http://amigo.geneontology.org/amigo/term/GO:0015193
regulation of signal transduction by p53 class mediator	Gene Ontology	GO:1901796	1	5	0.202378	0.445462	RPF2	http://amigo.geneontology.org/amigo/term/GO:1901796
MutLalpha complex binding	Gene Ontology	GO:0032405	1	5	0.202378	0.445462	WRN	http://amigo.geneontology.org/amigo/term/GO:0032405
rDNA heterochromatin assembly	Gene Ontology	GO:0000183	1	5	0.202378	0.445462	SMARCA5	http://amigo.geneontology.org/amigo/term/GO:0000183
proline transmembrane transport	Gene Ontology	GO:0035524	1	5	0.202378	0.445462	SLC36A4	http://amigo.geneontology.org/amigo/term/GO:0035524
manchette	Gene Ontology	GO:0002177	1	5	0.202378	0.445462	CCDC181	http://amigo.geneontology.org/amigo/term/GO:0002177
glutamine transport	Gene Ontology	GO:0006868	1	5	0.202378	0.445462	SLC38A6	http://amigo.geneontology.org/amigo/term/GO:0006868
positive regulation of granulocyte macrophage colony-stimulating factor production	Gene Ontology	GO:0032725	1	5	0.202378	0.445462	IL18	http://amigo.geneontology.org/amigo/term/GO:0032725
regulation of organ growth	Gene Ontology	GO:0046620	1	5	0.202378	0.445462	LATS1	http://amigo.geneontology.org/amigo/term/GO:0046620
semaphorin receptor complex	Gene Ontology	GO:0002116	1	5	0.202378	0.445462	PLXNB2	http://amigo.geneontology.org/amigo/term/GO:0002116
positive regulation of RNA export from nucleus	Gene Ontology	GO:0046833	1	5	0.202378	0.445462	KHDRBS1	http://amigo.geneontology.org/amigo/term/GO:0046833
RNA phosphodiester bond hydrolysis	Gene Ontology	GO:0090501	1	5	0.202378	0.445462	RNASEL	http://amigo.geneontology.org/amigo/term/GO:0090501
regulation of protein localization to nucleus	Gene Ontology	GO:1900180	1	5	0.202378	0.445462	RASSF5	http://amigo.geneontology.org/amigo/term/GO:1900180
positive regulation of mRNA catabolic process	Gene Ontology	GO:0061014	1	5	0.202378	0.445462	PNPT1	http://amigo.geneontology.org/amigo/term/GO:0061014
peripheral nervous system myelin maintenance	Gene Ontology	GO:0032287	1	5	0.202378	0.445462	SOD1	http://amigo.geneontology.org/amigo/term/GO:0032287
regulation of DNA-dependent DNA replication initiation	Gene Ontology	GO:0030174	1	5	0.202378	0.445462	WRNIP1	http://amigo.geneontology.org/amigo/term/GO:0030174
chordate embryonic development	Gene Ontology	GO:0043009	1	5	0.202378	0.445462	BRCA1	http://amigo.geneontology.org/amigo/term/GO:0043009
positive regulation of nuclear cell cycle DNA replication	Gene Ontology	GO:0010571	1	5	0.202378	0.445462	ATRX	http://amigo.geneontology.org/amigo/term/GO:0010571
establishment of spindle orientation	Gene Ontology	GO:0051294	1	5	0.202378	0.445462	CLASP1	http://amigo.geneontology.org/amigo/term/GO:0051294
ADP-ribose diphosphatase activity	Gene Ontology	GO:0047631	1	5	0.202378	0.445462	NUDT5	http://amigo.geneontology.org/amigo/term/GO:0047631
negative regulation of interleukin-10 production	Gene Ontology	GO:0032693	1	5	0.202378	0.445462	DLL1	http://amigo.geneontology.org/amigo/term/GO:0032693
mitochondrial protein catabolic process	Gene Ontology	GO:0035694	1	5	0.202378	0.445462	YME1L1	http://amigo.geneontology.org/amigo/term/GO:0035694
phosphatase inhibitor activity	Gene Ontology	GO:0019212	1	5	0.202378	0.445462	URI1	http://amigo.geneontology.org/amigo/term/GO:0019212
citrate metabolic process	Gene Ontology	GO:0006101	1	5	0.202378	0.445462	ACLY	http://amigo.geneontology.org/amigo/term/GO:0006101
negative regulation of centriole replication	Gene Ontology	GO:0046600	1	5	0.202378	0.445462	RBM14	http://amigo.geneontology.org/amigo/term/GO:0046600
Golgi cis cisterna	Gene Ontology	GO:0000137	1	5	0.202378	0.445462	GOLT1A	http://amigo.geneontology.org/amigo/term/GO:0000137
positive regulation of interleukin-5 production	Gene Ontology	GO:0032754	1	5	0.202378	0.445462	IL1RL1	http://amigo.geneontology.org/amigo/term/GO:0032754
acid phosphatase activity	Gene Ontology	GO:0003993	1	5	0.202378	0.445462	ACP5	http://amigo.geneontology.org/amigo/term/GO:0003993
positive regulation of transcription by RNA polymerase III	Gene Ontology	GO:0045945	1	5	0.202378	0.445462	MTOR	http://amigo.geneontology.org/amigo/term/GO:0045945
aspartic endopeptidase activity, intramembrane cleaving	Gene Ontology	GO:0042500	1	5	0.202378	0.445462	SPPL2A	http://amigo.geneontology.org/amigo/term/GO:0042500
JUN kinase binding	Gene Ontology	GO:0008432	1	5	0.202378	0.445462	MAD2L2	http://amigo.geneontology.org/amigo/term/GO:0008432
immunoglobulin V(D)J recombination	Gene Ontology	GO:0033152	1	5	0.202378	0.445462	PRKDC	http://amigo.geneontology.org/amigo/term/GO:0033152
luteinization	Gene Ontology	GO:0001553	1	5	0.202378	0.445462	SGPL1	http://amigo.geneontology.org/amigo/term/GO:0001553
N-acetylglucosamine 6-O-sulfotransferase activity	Gene Ontology	GO:0001517	1	5	0.202378	0.445462	CHST6	http://amigo.geneontology.org/amigo/term/GO:0001517
maternal behavior	Gene Ontology	GO:0042711	1	5	0.202378	0.445462	CREBRF	http://amigo.geneontology.org/amigo/term/GO:0042711
regulation of cellular response to oxidative stress	Gene Ontology	GO:1900407	1	5	0.202378	0.445462	FUT8	http://amigo.geneontology.org/amigo/term/GO:1900407
NADP metabolic process	Gene Ontology	GO:0006739	1	5	0.202378	0.445462	TP53I3	http://amigo.geneontology.org/amigo/term/GO:0006739
cellular response to arsenic-containing substance	Gene Ontology	GO:0071243	1	5	0.202378	0.445462	PPIF	http://amigo.geneontology.org/amigo/term/GO:0071243
chromosome passenger complex	Gene Ontology	GO:0032133	1	5	0.202378	0.445462	CDCA9	http://amigo.geneontology.org/amigo/term/GO:0032133
transepithelial chloride transport	Gene Ontology	GO:0030321	1	5	0.202378	0.445462	P2RY4	http://amigo.geneontology.org/amigo/term/GO:0030321
negative regulation of cardiac muscle cell differentiation	Gene Ontology	GO:2000726	1	5	0.202378	0.445462	DLL1	http://amigo.geneontology.org/amigo/term/GO:2000726
relaxation of cardiac muscle	Gene Ontology	GO:0055119	1	5	0.202378	0.445462	PDE5A	http://amigo.geneontology.org/amigo/term/GO:0055119
negative regulation of double-strand break repair	Gene Ontology	GO:2000780	1	5	0.202378	0.445462	TRIP12	http://amigo.geneontology.org/amigo/term/GO:2000780
chromatin assembly	Gene Ontology	GO:0031497	1	5	0.202378	0.445462	CHAF1B	http://amigo.geneontology.org/amigo/term/GO:0031497
positive regulation of ossification	Gene Ontology	GO:0045778	1	5	0.202378	0.445462	PTPN11	http://amigo.geneontology.org/amigo/term/GO:0045778
negative regulation of microtubule polymerization	Gene Ontology	GO:0031115	1	5	0.202378	0.445462	MAPRE1	http://amigo.geneontology.org/amigo/term/GO:0031115
serotonin metabolic process	Gene Ontology	GO:0042428	1	5	0.202378	0.445462	GRIN2A	http://amigo.geneontology.org/amigo/term/GO:0042428
shelterin complex	Gene Ontology	GO:0070187	1	5	0.202378	0.445462	POT1	http://amigo.geneontology.org/amigo/term/GO:0070187
maturation of 5.8S rRNA from tricistronic rRNA transcript (SSU-rRNA, 5.8S rRNA, LSU-rRNA)	Gene Ontology	GO:0000466	1	5	0.202378	0.445462	BOP1	http://amigo.geneontology.org/amigo/term/GO:0000466
homologous chromosome segregation	Gene Ontology	GO:0045143	1	5	0.202378	0.445462	PTTG2	http://amigo.geneontology.org/amigo/term/GO:0045143
intracellular distribution of mitochondria	Gene Ontology	GO:0048312	1	5	0.202378	0.445462	CLUH	http://amigo.geneontology.org/amigo/term/GO:0048312
kinetochore microtubule	Gene Ontology	GO:0005828	1	5	0.202378	0.445462	CLASP1	http://amigo.geneontology.org/amigo/term/GO:0005828
COPII-coated vesicle budding	Gene Ontology	GO:0090114	1	5	0.202378	0.445462	SEC13	http://amigo.geneontology.org/amigo/term/GO:0090114
long-chain fatty-acyl-CoA metabolic process	Gene Ontology	GO:0035336	1	5	0.202378	0.445462	ACSL3	http://amigo.geneontology.org/amigo/term/GO:0035336
regulation of DNA repair	Gene Ontology	GO:0006282	1	5	0.202378	0.445462	WRNIP1	http://amigo.geneontology.org/amigo/term/GO:0006282
AP-2 adaptor complex binding	Gene Ontology	GO:0035612	1	5	0.202378	0.445462	HIP1	http://amigo.geneontology.org/amigo/term/GO:0035612
paraspeckles	Gene Ontology	GO:0042382	1	5	0.202378	0.445462	SFPQ	http://amigo.geneontology.org/amigo/term/GO:0042382
cerebellar cortex development	Gene Ontology	GO:0021695	1	5	0.202378	0.445462	EZH2	http://amigo.geneontology.org/amigo/term/GO:0021695
negative regulation of proteasomal protein catabolic process	Gene Ontology	GO:1901799	1	5	0.202378	0.445462	FAM192A	http://amigo.geneontology.org/amigo/term/GO:1901799
negative regulation of circadian rhythm	Gene Ontology	GO:0042754	1	5	0.202378	0.445462	SFPQ	http://amigo.geneontology.org/amigo/term/GO:0042754
polysaccharide binding	Gene Ontology	GO:0030247	1	5	0.202378	0.445462	ENPP2	http://amigo.geneontology.org/amigo/term/GO:0030247
heart process	Gene Ontology	GO:0003015	1	5	0.202378	0.445462	NOX4	http://amigo.geneontology.org/amigo/term/GO:0003015
cellular response to muramyl dipeptide	Gene Ontology	GO:0071225	1	5	0.202378	0.445462	PTPN22	http://amigo.geneontology.org/amigo/term/GO:0071225
primitive streak formation	Gene Ontology	GO:0090009	1	5	0.202378	0.445462	HHEX	http://amigo.geneontology.org/amigo/term/GO:0090009
paranodal junction assembly	Gene Ontology	GO:0030913	1	5	0.202378	0.445462	PDCD2	http://amigo.geneontology.org/amigo/term/GO:0030913
semicircular canal morphogenesis	Gene Ontology	GO:0048752	1	5	0.202378	0.445462	CHD7	http://amigo.geneontology.org/amigo/term/GO:0048752
zonula adherens	Gene Ontology	GO:0005915	1	5	0.202378	0.445462	KIFC3	http://amigo.geneontology.org/amigo/term/GO:0005915
mature ribosome assembly	Gene Ontology	GO:0042256	1	5	0.202378	0.445462	EFL1	http://amigo.geneontology.org/amigo/term/GO:0042256
glomerular basement membrane development	Gene Ontology	GO:0032836	1	5	0.202378	0.445462	SULF1	http://amigo.geneontology.org/amigo/term/GO:0032836
gamma-secretase complex	Gene Ontology	GO:0070765	1	5	0.202378	0.445462	APH1A	http://amigo.geneontology.org/amigo/term/GO:0070765
phosphatidylcholine transporter activity	Gene Ontology	GO:0008525	1	5	0.202378	0.445462	PITPNB	http://amigo.geneontology.org/amigo/term/GO:0008525
RNA polymerase I core binding	Gene Ontology	GO:0001042	1	5	0.202378	0.445462	ERBB2	http://amigo.geneontology.org/amigo/term/GO:0001042
regulation of chromatin organization	Gene Ontology	GO:1902275	1	5	0.202378	0.445462	METTL4	http://amigo.geneontology.org/amigo/term/GO:1902275
RNA cap binding	Gene Ontology	GO:0000339	1	5	0.202378	0.445462	EIF4G3	http://amigo.geneontology.org/amigo/term/GO:0000339
membrane attack complex	Gene Ontology	GO:0005579	1	5	0.202378	0.445462	C5	http://amigo.geneontology.org/amigo/term/GO:0005579
secondary palate development	Gene Ontology	GO:0062009	1	5	0.202378	0.445462	CHD7	http://amigo.geneontology.org/amigo/term/GO:0062009
U3 snoRNA binding	Gene Ontology	GO:0034511	1	5	0.202378	0.445462	DIEXF	http://amigo.geneontology.org/amigo/term/GO:0034511
regulation of myoblast differentiation	Gene Ontology	GO:0045661	1	5	0.202378	0.445462	FLOT2	http://amigo.geneontology.org/amigo/term/GO:0045661
ammonium transmembrane transport	Gene Ontology	GO:0072488	1	5	0.202378	0.445462	RHAG	http://amigo.geneontology.org/amigo/term/GO:0072488
arachidonate-CoA ligase activity	Gene Ontology	GO:0047676	1	5	0.202378	0.445462	ACSBG2	http://amigo.geneontology.org/amigo/term/GO:0047676
sodium ion binding	Gene Ontology	GO:0031402	1	5	0.202378	0.445462	SLC34A2	http://amigo.geneontology.org/amigo/term/GO:0031402
negative regulation of growth	Gene Ontology	GO:0045926	1	5	0.202378	0.445462	PNPT1	http://amigo.geneontology.org/amigo/term/GO:0045926
receptor antagonist activity	Gene Ontology	GO:0048019	1	5	0.202378	0.445462	LRPAP1	http://amigo.geneontology.org/amigo/term/GO:0048019
positive regulation of mRNA 3'-end processing	Gene Ontology	GO:0031442	1	5	0.202378	0.445462	DHX36	http://amigo.geneontology.org/amigo/term/GO:0031442
replication-born double-strand break repair via sister chromatid exchange	Gene Ontology	GO:1990414	1	5	0.202378	0.445462	FANCB	http://amigo.geneontology.org/amigo/term/GO:1990414
DNA replication checkpoint	Gene Ontology	GO:0000076	1	5	0.202378	0.445462	TIPIN	http://amigo.geneontology.org/amigo/term/GO:0000076
L-alanine transport	Gene Ontology	GO:0015808	1	5	0.202378	0.445462	SLC36A4	http://amigo.geneontology.org/amigo/term/GO:0015808
cellular response to interleukin-6	Gene Ontology	GO:0071354	1	5	0.202378	0.445462	RELA	http://amigo.geneontology.org/amigo/term/GO:0071354
positive regulation of ER-associated ubiquitin-dependent protein catabolic process	Gene Ontology	GO:1903071	1	5	0.202378	0.445462	HERPUD1	http://amigo.geneontology.org/amigo/term/GO:1903071
inositol metabolic process	Gene Ontology	GO:0006020	1	5	0.202378	0.445462	PPIP5K1	http://amigo.geneontology.org/amigo/term/GO:0006020
germinal center formation	Gene Ontology	GO:0002467	1	5	0.202378	0.445462	UNC13D	http://amigo.geneontology.org/amigo/term/GO:0002467
anchored component of synaptic vesicle membrane	Gene Ontology	GO:0098993	1	5	0.202378	0.445462	RAB5A	http://amigo.geneontology.org/amigo/term/GO:0098993
positive regulation of superoxide anion generation	Gene Ontology	GO:0032930	1	5	0.202378	0.445462	SOD1	http://amigo.geneontology.org/amigo/term/GO:0032930
exonuclease activity	Gene Ontology	GO:0004527	1	5	0.202378	0.445462	REXO5	http://amigo.geneontology.org/amigo/term/GO:0004527
arginine metabolic process	Gene Ontology	GO:0006525	1	5	0.202378	0.445462	ASL2	http://amigo.geneontology.org/amigo/term/GO:0006525
positive regulation of hormone secretion	Gene Ontology	GO:0046887	1	5	0.202378	0.445462	PTPN11	http://amigo.geneontology.org/amigo/term/GO:0046887
insulin binding	Gene Ontology	GO:0043559	1	5	0.202378	0.445462	IDE	http://amigo.geneontology.org/amigo/term/GO:0043559
'de novo' pyrimidine nucleobase biosynthetic process	Gene Ontology	GO:0006207	1	5	0.202378	0.445462	MTOR	http://amigo.geneontology.org/amigo/term/GO:0006207
negative regulation of macrophage chemotaxis	Gene Ontology	GO:0010760	1	5	0.202378	0.445462	C5	http://amigo.geneontology.org/amigo/term/GO:0010760
ribosomal small subunit export from nucleus	Gene Ontology	GO:0000056	1	5	0.202378	0.445462	NPM1	http://amigo.geneontology.org/amigo/term/GO:0000056
negative regulation of cholesterol storage	Gene Ontology	GO:0010887	1	5	0.202378	0.445462	PPARD	http://amigo.geneontology.org/amigo/term/GO:0010887
transcription factor TFIIIC complex	Gene Ontology	GO:0000127	1	5	0.202378	0.445462	GTF3C1	http://amigo.geneontology.org/amigo/term/GO:0000127
negative regulation of interleukin-1 beta production	Gene Ontology	GO:0032691	1	5	0.202378	0.445462	ACP5	http://amigo.geneontology.org/amigo/term/GO:0032691
N-terminal peptidyl-methionine acetylation	Gene Ontology	GO:0017196	1	5	0.202378	0.445462	NAA30	http://amigo.geneontology.org/amigo/term/GO:0017196
mitotic centrosome separation	Gene Ontology	GO:0007100	1	5	0.202378	0.445462	KIF11	http://amigo.geneontology.org/amigo/term/GO:0007100
cellular response to lipoteichoic acid	Gene Ontology	GO:0071223	1	5	0.202378	0.445462	RELA	http://amigo.geneontology.org/amigo/term/GO:0071223
positive regulation of lipid storage	Gene Ontology	GO:0010884	1	5	0.202378	0.445462	C3	http://amigo.geneontology.org/amigo/term/GO:0010884
glucose:sodium symporter activity	Gene Ontology	GO:0005412	1	5	0.202378	0.445462	SLC5A9	http://amigo.geneontology.org/amigo/term/GO:0005412
trachea formation	Gene Ontology	GO:0060440	1	5	0.202378	0.445462	CTNNB1	http://amigo.geneontology.org/amigo/term/GO:0060440
Cul4B-RING E3 ubiquitin ligase complex	Gene Ontology	GO:0031465	1	5	0.202378	0.445462	DDB1	http://amigo.geneontology.org/amigo/term/GO:0031465
interleukin-6 production	Gene Ontology	GO:0032635	1	5	0.202378	0.445462	IL18RAP	http://amigo.geneontology.org/amigo/term/GO:0032635
craniofacial suture morphogenesis	Gene Ontology	GO:0097094	1	5	0.202378	0.445462	FOXN3	http://amigo.geneontology.org/amigo/term/GO:0097094
regulation of mitochondrial translation	Gene Ontology	GO:0070129	1	5	0.202378	0.445462	MTG1	http://amigo.geneontology.org/amigo/term/GO:0070129
antigen processing and presentation of endogenous peptide antigen via MHC class I	Gene Ontology	GO:0019885	1	5	0.202378	0.445462	IDE	http://amigo.geneontology.org/amigo/term/GO:0019885
viral RNA genome replication	Gene Ontology	GO:0039694	1	5	0.202378	0.445462	RAB5A	http://amigo.geneontology.org/amigo/term/GO:0039694
equatorial microtubule organizing center	Gene Ontology	GO:0000923	1	5	0.202378	0.445462	TUBGCP5	http://amigo.geneontology.org/amigo/term/GO:0000923
negative regulation of endoplasmic reticulum calcium ion concentration	Gene Ontology	GO:0032471	1	5	0.202378	0.445462	TGM2	http://amigo.geneontology.org/amigo/term/GO:0032471
fructokinase activity	Gene Ontology	GO:0008865	1	5	0.202378	0.445462	HK2	http://amigo.geneontology.org/amigo/term/GO:0008865
bone mineralization involved in bone maturation	Gene Ontology	GO:0035630	1	5	0.202378	0.445462	IFT80	http://amigo.geneontology.org/amigo/term/GO:0035630
positive regulation of cardioblast differentiation	Gene Ontology	GO:0051891	1	5	0.202378	0.445462	DHX36	http://amigo.geneontology.org/amigo/term/GO:0051891
dorsal aorta morphogenesis	Gene Ontology	GO:0035912	1	5	0.202378	0.445462	DLL4	http://amigo.geneontology.org/amigo/term/GO:0035912
regulation of aerobic respiration	Gene Ontology	GO:1903715	1	5	0.202378	0.445462	IDE	http://amigo.geneontology.org/amigo/term/GO:1903715
vasoactive intestinal polypeptide receptor activity	Gene Ontology	GO:0004999	1	5	0.202378	0.445462	VIPR2	http://amigo.geneontology.org/amigo/term/GO:0004999
protein methyltransferase activity	Gene Ontology	GO:0008276	1	5	0.202378	0.445462	METTL22	http://amigo.geneontology.org/amigo/term/GO:0008276
lactate metabolic process	Gene Ontology	GO:0006089	1	5	0.202378	0.445462	FASN	http://amigo.geneontology.org/amigo/term/GO:0006089
glycerol catabolic process	Gene Ontology	GO:0019563	1	5	0.202378	0.445462	TKFC	http://amigo.geneontology.org/amigo/term/GO:0019563
negative regulation of cholesterol efflux	Gene Ontology	GO:0090370	1	5	0.202378	0.445462	ABCA2	http://amigo.geneontology.org/amigo/term/GO:0090370
cellular response to glucagon stimulus	Gene Ontology	GO:0071377	1	5	0.202378	0.445462	GCGR	http://amigo.geneontology.org/amigo/term/GO:0071377
amyloid-beta clearance by cellular catabolic process	Gene Ontology	GO:0150094	1	5	0.202378	0.445462	IDE	http://amigo.geneontology.org/amigo/term/GO:0150094
Ragulator complex	Gene Ontology	GO:0071986	1	5	0.202378	0.445462	LAMTOR5	http://amigo.geneontology.org/amigo/term/GO:0071986
modified amino acid binding	Gene Ontology	GO:0072341	1	5	0.202378	0.445462	NOX4	http://amigo.geneontology.org/amigo/term/GO:0072341
L-glutamine transmembrane transporter activity	Gene Ontology	GO:0015186	1	5	0.202378	0.445462	SLC38A6	http://amigo.geneontology.org/amigo/term/GO:0015186
peptide alpha-N-acetyltransferase activity	Gene Ontology	GO:0004596	1	5	0.202378	0.445462	NAA30	http://amigo.geneontology.org/amigo/term/GO:0004596
cellular protein metabolic process	Gene Ontology	GO:0044267	1	5	0.202378	0.445462	LTA4H	http://amigo.geneontology.org/amigo/term/GO:0044267
neutrophil differentiation	Gene Ontology	GO:0030223	1	5	0.202378	0.445462	FASN	http://amigo.geneontology.org/amigo/term/GO:0030223
regulation of potassium ion transmembrane transporter activity	Gene Ontology	GO:1901016	1	5	0.202378	0.445462	WWP2	http://amigo.geneontology.org/amigo/term/GO:1901016
negative regulation of telomerase activity	Gene Ontology	GO:0051974	1	5	0.202378	0.445462	POT1	http://amigo.geneontology.org/amigo/term/GO:0051974
negative regulation of fibroblast apoptotic process	Gene Ontology	GO:2000270	1	5	0.202378	0.445462	PIK3CA	http://amigo.geneontology.org/amigo/term/GO:2000270
G-quadruplex RNA binding	Gene Ontology	GO:0002151	1	5	0.202378	0.445462	DHX36	http://amigo.geneontology.org/amigo/term/GO:0002151
mitochondrial protein processing	Gene Ontology	GO:0034982	1	5	0.202378	0.445462	YME1L1	http://amigo.geneontology.org/amigo/term/GO:0034982
negative regulation of amyloid-beta clearance	Gene Ontology	GO:1900222	1	5	0.202378	0.445462	LRPAP1	http://amigo.geneontology.org/amigo/term/GO:1900222
mannokinase activity	Gene Ontology	GO:0019158	1	5	0.202378	0.445462	HK2	http://amigo.geneontology.org/amigo/term/GO:0019158
corticospinal tract morphogenesis	Gene Ontology	GO:0021957	1	5	0.202378	0.445462	NIN	http://amigo.geneontology.org/amigo/term/GO:0021957
negative regulation of ATPase activity	Gene Ontology	GO:0032780	1	5	0.202378	0.445462	PPIF	http://amigo.geneontology.org/amigo/term/GO:0032780
zinc ion transport	Gene Ontology	GO:0006829	1	5	0.202378	0.445462	SLC30A6	http://amigo.geneontology.org/amigo/term/GO:0006829
DNA replication factor C complex	Gene Ontology	GO:0005663	1	5	0.202378	0.445462	RFC1	http://amigo.geneontology.org/amigo/term/GO:0005663
tRNA aminoacylation for protein translation	Gene Ontology	GO:0006418	1	5	0.202378	0.445462	TARSL2	http://amigo.geneontology.org/amigo/term/GO:0006418
snRNA processing	Gene Ontology	GO:0016180	1	5	0.202378	0.445462	INTS3	http://amigo.geneontology.org/amigo/term/GO:0016180
eukaryotic translation initiation factor 2B complex	Gene Ontology	GO:0005851	1	5	0.202378	0.445462	EIF2B2	http://amigo.geneontology.org/amigo/term/GO:0005851
regulation of branching involved in mammary gland duct morphogenesis	Gene Ontology	GO:0060762	1	5	0.202378	0.445462	PHB2	http://amigo.geneontology.org/amigo/term/GO:0060762
acyl-CoA dehydrogenase activity	Gene Ontology	GO:0003995	1	5	0.202378	0.445462	ACADS	http://amigo.geneontology.org/amigo/term/GO:0003995
histone ubiquitination	Gene Ontology	GO:0016574	1	5	0.202378	0.445462	PHC1	http://amigo.geneontology.org/amigo/term/GO:0016574
cell cycle phase transition	Gene Ontology	GO:0044770	1	5	0.202378	0.445462	TIPIN	http://amigo.geneontology.org/amigo/term/GO:0044770
CDP-choline pathway	Gene Ontology	GO:0006657	1	5	0.202378	0.445462	PCYT1A	http://amigo.geneontology.org/amigo/term/GO:0006657
embryonic neurocranium morphogenesis	Gene Ontology	GO:0048702	1	5	0.202378	0.445462	MED12	http://amigo.geneontology.org/amigo/term/GO:0048702
cytoplasmic sequestering of protein	Gene Ontology	GO:0051220	1	5	0.202378	0.445462	LATS1	http://amigo.geneontology.org/amigo/term/GO:0051220
regulation of vacuole fusion, non-autophagic	Gene Ontology	GO:0032889	1	5	0.202378	0.445462	ENO1	http://amigo.geneontology.org/amigo/term/GO:0032889
regulation of mitotic cell cycle phase transition	Gene Ontology	GO:1901990	1	5	0.202378	0.445462	DDB1	http://amigo.geneontology.org/amigo/term/GO:1901990
cell-substrate junction assembly	Gene Ontology	GO:0007044	1	5	0.202378	0.445462	TNS1	http://amigo.geneontology.org/amigo/term/GO:0007044
cellular response to increased oxygen levels	Gene Ontology	GO:0036295	1	5	0.202378	0.445462	ATP6V0A2	http://amigo.geneontology.org/amigo/term/GO:0036295
negative regulation of blood vessel endothelial cell proliferation involved in sprouting angiogenesis	Gene Ontology	GO:1903588	1	5	0.202378	0.445462	DLL4	http://amigo.geneontology.org/amigo/term/GO:1903588
dendrite terminus	Gene Ontology	GO:0044292	1	5	0.202378	0.445462	IFT57	http://amigo.geneontology.org/amigo/term/GO:0044292
calcineurin complex	Gene Ontology	GO:0005955	1	5	0.202378	0.445462	ITPR1	http://amigo.geneontology.org/amigo/term/GO:0005955
single-stranded telomeric DNA binding	Gene Ontology	GO:0043047	1	5	0.202378	0.445462	POT1	http://amigo.geneontology.org/amigo/term/GO:0043047
cellular response to tumor necrosis factor	Gene Ontology	GO:0071356	4	59	0.203917	0.445462	BRCA1	RELA	CHUK	BAG4	http://amigo.geneontology.org/amigo/term/GO:0071356
proteolysis	Gene Ontology	GO:0006508	13	258	0.205885	0.445462	CLPX	SGPL1	YME1L1	NPEPL1	PGPEP1	PLAU	RHBDF2	CAPN1	LTA4H	SCRN2	NPEPPS	CNDP2	HTRA3	http://amigo.geneontology.org/amigo/term/GO:0006508
behavioral fear response	Gene Ontology	GO:0001662	2	21	0.208377	0.445462	VDAC3	EIF4G1	http://amigo.geneontology.org/amigo/term/GO:0001662
polysomal ribosome	Gene Ontology	GO:0042788	2	21	0.208377	0.445462	RPL36	NUFIP2	http://amigo.geneontology.org/amigo/term/GO:0042788
COP9 signalosome	Gene Ontology	GO:0008180	2	21	0.208377	0.445462	MYH9	COPS5	http://amigo.geneontology.org/amigo/term/GO:0008180
U4/U6 x U5 tri-snRNP complex	Gene Ontology	GO:0046540	2	21	0.208377	0.445462	EFTUD2	ZMAT2	http://amigo.geneontology.org/amigo/term/GO:0046540
cell periphery	Gene Ontology	GO:0071944	2	21	0.208377	0.445462	PHB2	KRT18	http://amigo.geneontology.org/amigo/term/GO:0071944
endoribonuclease activity	Gene Ontology	GO:0004521	2	21	0.208377	0.445462	LACTB2	RNASET2	http://amigo.geneontology.org/amigo/term/GO:0004521
positive regulation of ATPase activity	Gene Ontology	GO:0032781	2	21	0.208377	0.445462	DNAJA2	DNAJB6	http://amigo.geneontology.org/amigo/term/GO:0032781
positive regulation of Wnt signaling pathway	Gene Ontology	GO:0030177	2	21	0.208377	0.445462	HHEX	SULF1	http://amigo.geneontology.org/amigo/term/GO:0030177
platelet-derived growth factor receptor signaling pathway	Gene Ontology	GO:0048008	2	21	0.208377	0.445462	PTPN11	SGPL1	http://amigo.geneontology.org/amigo/term/GO:0048008
glycolytic process	Gene Ontology	GO:0006096	2	21	0.208377	0.445462	HK2	ENO1	http://amigo.geneontology.org/amigo/term/GO:0006096
positive regulation of phagocytosis	Gene Ontology	GO:0050766	2	21	0.208377	0.445462	CYBA	SOD1	http://amigo.geneontology.org/amigo/term/GO:0050766
cellular response to lipopolysaccharide	Gene Ontology	GO:0071222	4	60	0.211666	0.445462	NFKBIB	CTR9	RELA	ADAM9	http://amigo.geneontology.org/amigo/term/GO:0071222
transcription corepressor activity	Gene Ontology	GO:0003714	7	124	0.211891	0.445462	ARID5A	CASP8AP2	TCERG1	SPEN	EZH2	CTBP1	URI1	http://amigo.geneontology.org/amigo/term/GO:0003714
repressing transcription factor binding	Gene Ontology	GO:0070491	3	40	0.211966	0.445462	CTNNB1	CTBP1	RELA	http://amigo.geneontology.org/amigo/term/GO:0070491
actin cytoskeleton reorganization	Gene Ontology	GO:0031532	3	40	0.211966	0.445462	SIPA1L1	PARVB	MYH9	http://amigo.geneontology.org/amigo/term/GO:0031532
cytoplasmic stress granule	Gene Ontology	GO:0010494	3	40	0.211966	0.445462	LSM14A	NUFIP2	DHX36	http://amigo.geneontology.org/amigo/term/GO:0010494
basolateral plasma membrane	Gene Ontology	GO:0016323	5	82	0.219546	0.445462	CTNNB1	IDE	ITGA3	ABCC1	CNNM4	http://amigo.geneontology.org/amigo/term/GO:0016323
protein serine/threonine phosphatase activity	Gene Ontology	GO:0004722	3	41	0.221714	0.445462	CDKN3	MTMR4	PPM1J	http://amigo.geneontology.org/amigo/term/GO:0004722
cytoplasmic ribonucleoprotein granule	Gene Ontology	GO:0036464	3	41	0.221714	0.445462	TAF5L	STAU1	RPLP0	http://amigo.geneontology.org/amigo/term/GO:0036464
nucleic acid phosphodiester bond hydrolysis	Gene Ontology	GO:0090305	3	41	0.221714	0.445462	WRN	ENPP2	REXO5	http://amigo.geneontology.org/amigo/term/GO:0090305
insulin receptor signaling pathway	Gene Ontology	GO:0008286	3	41	0.221714	0.445462	APPL1	SMARCC1	GPLD1	http://amigo.geneontology.org/amigo/term/GO:0008286
protein K63-linked deubiquitination	Gene Ontology	GO:0070536	2	22	0.222111	0.445462	OTUD7B	USP20	http://amigo.geneontology.org/amigo/term/GO:0070536
DNA damage checkpoint	Gene Ontology	GO:0000077	2	22	0.222111	0.445462	MAD2L2	PTPN11	http://amigo.geneontology.org/amigo/term/GO:0000077
intracellular receptor signaling pathway	Gene Ontology	GO:0030522	2	22	0.222111	0.445462	PPARD	NR2F2	http://amigo.geneontology.org/amigo/term/GO:0030522
chromosome, centromeric region	Gene Ontology	GO:0000775	2	22	0.222111	0.445462	CENPN	CDCA9	http://amigo.geneontology.org/amigo/term/GO:0000775
phosphatidylcholine binding	Gene Ontology	GO:0031210	2	22	0.222111	0.445462	PCYT1A	PITPNB	http://amigo.geneontology.org/amigo/term/GO:0031210
transport vesicle	Gene Ontology	GO:0030133	2	22	0.222111	0.445462	BLOC1S6	BLOC1S5	http://amigo.geneontology.org/amigo/term/GO:0030133
establishment of protein localization	Gene Ontology	GO:0045184	2	22	0.222111	0.445462	ITGA8	CORO1C	http://amigo.geneontology.org/amigo/term/GO:0045184
positive regulation of axonogenesis	Gene Ontology	GO:0050772	2	22	0.222111	0.445462	PLXNB2	NIN	http://amigo.geneontology.org/amigo/term/GO:0050772
nucleotide-excision repair	Gene Ontology	GO:0006289	2	22	0.222111	0.445462	DDB1	NEIL3	http://amigo.geneontology.org/amigo/term/GO:0006289
basal plasma membrane	Gene Ontology	GO:0009925	2	22	0.222111	0.445462	ERBB2	ABCC1	http://amigo.geneontology.org/amigo/term/GO:0009925
3'-5'-exoribonuclease activity	Gene Ontology	GO:0000175	2	22	0.222111	0.445462	PNPT1	ANGEL2	http://amigo.geneontology.org/amigo/term/GO:0000175
centrosome cycle	Gene Ontology	GO:0007098	2	22	0.222111	0.445462	PCM1	NPM1	http://amigo.geneontology.org/amigo/term/GO:0007098
DNA-directed 5'-3' RNA polymerase activity	Gene Ontology	GO:0003899	2	22	0.222111	0.445462	CRCP	POLR2B	http://amigo.geneontology.org/amigo/term/GO:0003899
regulation of cell adhesion	Gene Ontology	GO:0030155	2	22	0.222111	0.445462	DLL1	LAMA1	http://amigo.geneontology.org/amigo/term/GO:0030155
germ cell development	Gene Ontology	GO:0007281	2	22	0.222111	0.445462	MOV10L1	MTOR	http://amigo.geneontology.org/amigo/term/GO:0007281
organic acid metabolic process	Gene Ontology	GO:0006082	2	22	0.222111	0.445462	CYP2J21	CYP2U1	http://amigo.geneontology.org/amigo/term/GO:0006082
small GTPase mediated signal transduction	Gene Ontology	GO:0007264	4	62	0.2274	0.445462	CCDC88C	DOCK10	DOCK11	ARHGAP1	http://amigo.geneontology.org/amigo/term/GO:0007264
negative regulation of cell migration	Gene Ontology	GO:0030336	4	62	0.2274	0.445462	RECK	DLG5	SULF1	ADARB1	http://amigo.geneontology.org/amigo/term/GO:0030336
mitochondrial intermembrane space	Gene Ontology	GO:0005758	3	42	0.231548	0.445462	NDUFS1	PNPT1	AGK	http://amigo.geneontology.org/amigo/term/GO:0005758
stem cell population maintenance	Gene Ontology	GO:0019827	3	42	0.231548	0.445462	TBX3	MED12	CTR9	http://amigo.geneontology.org/amigo/term/GO:0019827
cellular response to insulin stimulus	Gene Ontology	GO:0032869	3	42	0.231548	0.445462	RAB12	PARP1	PRKDC	http://amigo.geneontology.org/amigo/term/GO:0032869
collateral sprouting	Gene Ontology	GO:0048668	1	6	0.231882	0.445462	NIN	http://amigo.geneontology.org/amigo/term/GO:0048668
'de novo' IMP biosynthetic process	Gene Ontology	GO:0006189	1	6	0.231882	0.445462	GART	http://amigo.geneontology.org/amigo/term/GO:0006189
regulation of clathrin-dependent endocytosis	Gene Ontology	GO:2000369	1	6	0.231882	0.445462	SNAP91	http://amigo.geneontology.org/amigo/term/GO:2000369
monosaccharide binding	Gene Ontology	GO:0048029	1	6	0.231882	0.445462	ALPK1	http://amigo.geneontology.org/amigo/term/GO:0048029
regulation of cell motility	Gene Ontology	GO:2000145	1	6	0.231882	0.445462	INPP5F	http://amigo.geneontology.org/amigo/term/GO:2000145
histone methyltransferase activity	Gene Ontology	GO:0042054	1	6	0.231882	0.445462	PRDM11	http://amigo.geneontology.org/amigo/term/GO:0042054
positive regulation of RIG-I signaling pathway	Gene Ontology	GO:1900246	1	6	0.231882	0.445462	DDX60	http://amigo.geneontology.org/amigo/term/GO:1900246
retrograde axonal transport	Gene Ontology	GO:0008090	1	6	0.231882	0.445462	SOD1	http://amigo.geneontology.org/amigo/term/GO:0008090
regulation of centriole replication	Gene Ontology	GO:0046599	1	6	0.231882	0.445462	STIL	http://amigo.geneontology.org/amigo/term/GO:0046599
regulation of calcium ion import	Gene Ontology	GO:0090279	1	6	0.231882	0.445462	CTNNB1	http://amigo.geneontology.org/amigo/term/GO:0090279
positive regulation of extracellular matrix disassembly	Gene Ontology	GO:0090091	1	6	0.231882	0.445462	CLASP1	http://amigo.geneontology.org/amigo/term/GO:0090091
adiponectin-activated signaling pathway	Gene Ontology	GO:0033211	1	6	0.231882	0.445462	APPL1	http://amigo.geneontology.org/amigo/term/GO:0033211
adult feeding behavior	Gene Ontology	GO:0008343	1	6	0.231882	0.445462	IFT80	http://amigo.geneontology.org/amigo/term/GO:0008343
inner mitochondrial membrane organization	Gene Ontology	GO:0007007	1	6	0.231882	0.445462	TAZ	http://amigo.geneontology.org/amigo/term/GO:0007007
negative regulation of retinoic acid receptor signaling pathway	Gene Ontology	GO:0048387	1	6	0.231882	0.445462	EZH2	http://amigo.geneontology.org/amigo/term/GO:0048387
Sertoli cell development	Gene Ontology	GO:0060009	1	6	0.231882	0.445462	ATRX	http://amigo.geneontology.org/amigo/term/GO:0060009
ammonium transmembrane transporter activity	Gene Ontology	GO:0008519	1	6	0.231882	0.445462	RHAG	http://amigo.geneontology.org/amigo/term/GO:0008519
G protein-coupled receptor kinase activity	Gene Ontology	GO:0004703	1	6	0.231882	0.445462	GRK6	http://amigo.geneontology.org/amigo/term/GO:0004703
interferon-gamma production	Gene Ontology	GO:0032609	1	6	0.231882	0.445462	IL18RAP	http://amigo.geneontology.org/amigo/term/GO:0032609
mast cell degranulation	Gene Ontology	GO:0043303	1	6	0.231882	0.445462	CHGA	http://amigo.geneontology.org/amigo/term/GO:0043303
myeloid cell homeostasis	Gene Ontology	GO:0002262	1	6	0.231882	0.445462	SOD1	http://amigo.geneontology.org/amigo/term/GO:0002262
positive regulation of mammary gland epithelial cell proliferation	Gene Ontology	GO:0033601	1	6	0.231882	0.445462	RTN4	http://amigo.geneontology.org/amigo/term/GO:0033601
thiamine pyrophosphate binding	Gene Ontology	GO:0030976	1	6	0.231882	0.445462	ILVBL	http://amigo.geneontology.org/amigo/term/GO:0030976
negative regulation of protein transport	Gene Ontology	GO:0051224	1	6	0.231882	0.445462	WWP2	http://amigo.geneontology.org/amigo/term/GO:0051224
tRNA methyltransferase activity	Gene Ontology	GO:0008175	1	6	0.231882	0.445462	TRMT12	http://amigo.geneontology.org/amigo/term/GO:0008175
protein insertion into mitochondrial inner membrane	Gene Ontology	GO:0045039	1	6	0.231882	0.445462	AGK	http://amigo.geneontology.org/amigo/term/GO:0045039
adenyl-nucleotide exchange factor activity	Gene Ontology	GO:0000774	1	6	0.231882	0.445462	GRPEL2	http://amigo.geneontology.org/amigo/term/GO:0000774
DNA translocase activity	Gene Ontology	GO:0015616	1	6	0.231882	0.445462	ATRX	http://amigo.geneontology.org/amigo/term/GO:0015616
dopamine metabolic process	Gene Ontology	GO:0042417	1	6	0.231882	0.445462	GRIN2A	http://amigo.geneontology.org/amigo/term/GO:0042417
carbohydrate transport	Gene Ontology	GO:0008643	1	6	0.231882	0.445462	SLC35B1	http://amigo.geneontology.org/amigo/term/GO:0008643
AMP-activated protein kinase activity	Gene Ontology	GO:0004679	1	6	0.231882	0.445462	PRKAG2	http://amigo.geneontology.org/amigo/term/GO:0004679
lung-associated mesenchyme development	Gene Ontology	GO:0060484	1	6	0.231882	0.445462	CTNNB1	http://amigo.geneontology.org/amigo/term/GO:0060484
negative regulation of platelet aggregation	Gene Ontology	GO:0090331	1	6	0.231882	0.445462	SH2B3	http://amigo.geneontology.org/amigo/term/GO:0090331
retina homeostasis	Gene Ontology	GO:0001895	1	6	0.231882	0.445462	SOD1	http://amigo.geneontology.org/amigo/term/GO:0001895
mannose metabolic process	Gene Ontology	GO:0006013	1	6	0.231882	0.445462	MAN2B2	http://amigo.geneontology.org/amigo/term/GO:0006013
regulation of cardiac conduction	Gene Ontology	GO:1903779	1	6	0.231882	0.445462	AGT	http://amigo.geneontology.org/amigo/term/GO:1903779
NADPH-hemoprotein reductase activity	Gene Ontology	GO:0003958	1	6	0.231882	0.445462	NDOR1	http://amigo.geneontology.org/amigo/term/GO:0003958
positive regulation of interleukin-17 production	Gene Ontology	GO:0032740	1	6	0.231882	0.445462	IL18	http://amigo.geneontology.org/amigo/term/GO:0032740
long-chain fatty acyl-CoA binding	Gene Ontology	GO:0036042	1	6	0.231882	0.445462	ACOT7	http://amigo.geneontology.org/amigo/term/GO:0036042
response to organic cyclic compound	Gene Ontology	GO:0014070	1	6	0.231882	0.445462	HSF2	http://amigo.geneontology.org/amigo/term/GO:0014070
regulation of protein export from nucleus	Gene Ontology	GO:0046825	1	6	0.231882	0.445462	PTPN11	http://amigo.geneontology.org/amigo/term/GO:0046825
cell projection membrane	Gene Ontology	GO:0031253	1	6	0.231882	0.445462	MAPRE1	http://amigo.geneontology.org/amigo/term/GO:0031253
estrogen metabolic process	Gene Ontology	GO:0008210	1	6	0.231882	0.445462	SGPL1	http://amigo.geneontology.org/amigo/term/GO:0008210
endoplasmic reticulum-plasma membrane contact site	Gene Ontology	GO:0140268	1	6	0.231882	0.445462	SARAF	http://amigo.geneontology.org/amigo/term/GO:0140268
T cell receptor complex	Gene Ontology	GO:0042101	1	6	0.231882	0.445462	ALCAM	http://amigo.geneontology.org/amigo/term/GO:0042101
histone methylation	Gene Ontology	GO:0016571	1	6	0.231882	0.445462	PRDM11	http://amigo.geneontology.org/amigo/term/GO:0016571
BRCA1-A complex	Gene Ontology	GO:0070531	1	6	0.231882	0.445462	BRCA1	http://amigo.geneontology.org/amigo/term/GO:0070531
sphingomyelin phosphodiesterase activity	Gene Ontology	GO:0004767	1	6	0.231882	0.445462	SMPD1	http://amigo.geneontology.org/amigo/term/GO:0004767
low-density lipoprotein particle remodeling	Gene Ontology	GO:0034374	1	6	0.231882	0.445462	PLA2G2E	http://amigo.geneontology.org/amigo/term/GO:0034374
positive regulation of telomere maintenance	Gene Ontology	GO:0032206	1	6	0.231882	0.445462	ATRX	http://amigo.geneontology.org/amigo/term/GO:0032206
positive regulation of mitochondrial calcium ion concentration	Gene Ontology	GO:0051561	1	6	0.231882	0.445462	TGM2	http://amigo.geneontology.org/amigo/term/GO:0051561
positive regulation of transcription from RNA polymerase II promoter involved in cellular response to chemical stimulus	Gene Ontology	GO:1901522	1	6	0.231882	0.445462	RELA	http://amigo.geneontology.org/amigo/term/GO:1901522
peptidyl-lysine hydroxylation	Gene Ontology	GO:0017185	1	6	0.231882	0.445462	PLOD2	http://amigo.geneontology.org/amigo/term/GO:0017185
glycosaminoglycan biosynthetic process	Gene Ontology	GO:0006024	1	6	0.231882	0.445462	EXT2	http://amigo.geneontology.org/amigo/term/GO:0006024
NMDA glutamate receptor activity	Gene Ontology	GO:0004972	1	6	0.231882	0.445462	GRIN2A	http://amigo.geneontology.org/amigo/term/GO:0004972
3',5'-cyclic-GMP phosphodiesterase activity	Gene Ontology	GO:0047555	1	6	0.231882	0.445462	PDE5A	http://amigo.geneontology.org/amigo/term/GO:0047555
negative regulation of blood coagulation	Gene Ontology	GO:0030195	1	6	0.231882	0.445462	TFPI	http://amigo.geneontology.org/amigo/term/GO:0030195
phosphatidylinositol transfer activity	Gene Ontology	GO:0008526	1	6	0.231882	0.445462	PITPNB	http://amigo.geneontology.org/amigo/term/GO:0008526
kinetochore binding	Gene Ontology	GO:0043515	1	6	0.231882	0.445462	CLASP1	http://amigo.geneontology.org/amigo/term/GO:0043515
sphingosine N-acyltransferase activity	Gene Ontology	GO:0050291	1	6	0.231882	0.445462	CERS2	http://amigo.geneontology.org/amigo/term/GO:0050291
cardiolipin biosynthetic process	Gene Ontology	GO:0032049	1	6	0.231882	0.445462	TAZ	http://amigo.geneontology.org/amigo/term/GO:0032049
negative regulation of cilium assembly	Gene Ontology	GO:1902018	1	6	0.231882	0.445462	CDK10	http://amigo.geneontology.org/amigo/term/GO:1902018
protein lipoylation	Gene Ontology	GO:0009249	1	6	0.231882	0.445462	LIAS	http://amigo.geneontology.org/amigo/term/GO:0009249
positive regulation of cellular senescence	Gene Ontology	GO:2000774	1	6	0.231882	0.445462	HMGA1	http://amigo.geneontology.org/amigo/term/GO:2000774
four-way junction helicase activity	Gene Ontology	GO:0009378	1	6	0.231882	0.445462	WRN	http://amigo.geneontology.org/amigo/term/GO:0009378
positive regulation of signal transduction	Gene Ontology	GO:0009967	1	6	0.231882	0.445462	EIF2A	http://amigo.geneontology.org/amigo/term/GO:0009967
transmembrane receptor protein tyrosine kinase adaptor activity	Gene Ontology	GO:0005068	1	6	0.231882	0.445462	SH2B3	http://amigo.geneontology.org/amigo/term/GO:0005068
type I interferon signaling pathway	Gene Ontology	GO:0060337	1	6	0.231882	0.445462	IFNAR2	http://amigo.geneontology.org/amigo/term/GO:0060337
phosphatidylinositol-3,5-bisphosphate 3-phosphatase activity	Gene Ontology	GO:0052629	1	6	0.231882	0.445462	MTMR4	http://amigo.geneontology.org/amigo/term/GO:0052629
positive regulation of fibroblast growth factor receptor signaling pathway	Gene Ontology	GO:0045743	1	6	0.231882	0.445462	CTNNB1	http://amigo.geneontology.org/amigo/term/GO:0045743
peroxisome proliferator activated receptor signaling pathway	Gene Ontology	GO:0035357	1	6	0.231882	0.445462	ACTN4	http://amigo.geneontology.org/amigo/term/GO:0035357
pyruvate metabolic process	Gene Ontology	GO:0006090	1	6	0.231882	0.445462	LDHA	http://amigo.geneontology.org/amigo/term/GO:0006090
VCP-NPL4-UFD1 AAA ATPase complex	Gene Ontology	GO:0034098	1	6	0.231882	0.445462	UBXN7	http://amigo.geneontology.org/amigo/term/GO:0034098
pre-replicative complex assembly involved in nuclear cell cycle DNA replication	Gene Ontology	GO:0006267	1	6	0.231882	0.445462	MCM2	http://amigo.geneontology.org/amigo/term/GO:0006267
regulation of neuron apoptotic process	Gene Ontology	GO:0043523	1	6	0.231882	0.445462	NAE1	http://amigo.geneontology.org/amigo/term/GO:0043523
lamellipodium morphogenesis	Gene Ontology	GO:0072673	1	6	0.231882	0.445462	ABI1	http://amigo.geneontology.org/amigo/term/GO:0072673
negative regulation of chemokine-mediated signaling pathway	Gene Ontology	GO:0070100	1	6	0.231882	0.445462	SH2B3	http://amigo.geneontology.org/amigo/term/GO:0070100
pericardium morphogenesis	Gene Ontology	GO:0003344	1	6	0.231882	0.445462	DLL4	http://amigo.geneontology.org/amigo/term/GO:0003344
DEAD/H-box RNA helicase binding	Gene Ontology	GO:0017151	1	6	0.231882	0.445462	POT1	http://amigo.geneontology.org/amigo/term/GO:0017151
vesicle organization	Gene Ontology	GO:0016050	1	6	0.231882	0.445462	SAR1B	http://amigo.geneontology.org/amigo/term/GO:0016050
ferric iron binding	Gene Ontology	GO:0008199	1	6	0.231882	0.445462	ACP5	http://amigo.geneontology.org/amigo/term/GO:0008199
chromatin silencing at telomere	Gene Ontology	GO:0006348	1	6	0.231882	0.445462	EZH2	http://amigo.geneontology.org/amigo/term/GO:0006348
peptidyl-diphthamide biosynthetic process from peptidyl-histidine	Gene Ontology	GO:0017183	1	6	0.231882	0.445462	DPH6	http://amigo.geneontology.org/amigo/term/GO:0017183
regulation of fat cell differentiation	Gene Ontology	GO:0045598	1	6	0.231882	0.445462	PPARD	http://amigo.geneontology.org/amigo/term/GO:0045598
UMP salvage	Gene Ontology	GO:0044206	1	6	0.231882	0.445462	UCKL1	http://amigo.geneontology.org/amigo/term/GO:0044206
leukotriene-C4 synthase activity	Gene Ontology	GO:0004464	1	6	0.231882	0.445462	ALOX5AP	http://amigo.geneontology.org/amigo/term/GO:0004464
negative regulation of p38MAPK cascade	Gene Ontology	GO:1903753	1	6	0.231882	0.445462	PTPN22	http://amigo.geneontology.org/amigo/term/GO:1903753
regulation of ruffle assembly	Gene Ontology	GO:1900027	1	6	0.231882	0.445462	CORO1C	http://amigo.geneontology.org/amigo/term/GO:1900027
negative regulation of cytokine production	Gene Ontology	GO:0001818	1	6	0.231882	0.445462	NPTN	http://amigo.geneontology.org/amigo/term/GO:0001818
positive regulation of cysteine-type endopeptidase activity involved in apoptotic signaling pathway	Gene Ontology	GO:2001269	1	6	0.231882	0.445462	PRR7	http://amigo.geneontology.org/amigo/term/GO:2001269
positive regulation of DNA biosynthetic process	Gene Ontology	GO:2000573	1	6	0.231882	0.445462	NOX4	http://amigo.geneontology.org/amigo/term/GO:2000573
nuclear pericentric heterochromatin	Gene Ontology	GO:0031618	1	6	0.231882	0.445462	ATRX	http://amigo.geneontology.org/amigo/term/GO:0031618
myosin filament	Gene Ontology	GO:0032982	1	6	0.231882	0.445462	MYH11	http://amigo.geneontology.org/amigo/term/GO:0032982
synaptic vesicle budding from presynaptic endocytic zone membrane	Gene Ontology	GO:0016185	1	6	0.231882	0.445462	SNAP91	http://amigo.geneontology.org/amigo/term/GO:0016185
efflux transmembrane transporter activity	Gene Ontology	GO:0015562	1	6	0.231882	0.445462	ABCC1	http://amigo.geneontology.org/amigo/term/GO:0015562
antibacterial humoral response	Gene Ontology	GO:0019731	1	6	0.231882	0.445462	FAU	http://amigo.geneontology.org/amigo/term/GO:0019731
clathrin coat of coated pit	Gene Ontology	GO:0030132	1	6	0.231882	0.445462	CLTCL1	http://amigo.geneontology.org/amigo/term/GO:0030132
response to osmotic stress	Gene Ontology	GO:0006970	1	6	0.231882	0.445462	ATF2	http://amigo.geneontology.org/amigo/term/GO:0006970
bile acid biosynthetic process	Gene Ontology	GO:0006699	1	6	0.231882	0.445462	BAAT	http://amigo.geneontology.org/amigo/term/GO:0006699
chromosome separation	Gene Ontology	GO:0051304	1	6	0.231882	0.445462	SMARCAD1	http://amigo.geneontology.org/amigo/term/GO:0051304
alpha-mannosidase activity	Gene Ontology	GO:0004559	1	6	0.231882	0.445462	MAN2B2	http://amigo.geneontology.org/amigo/term/GO:0004559
retina morphogenesis in camera-type eye	Gene Ontology	GO:0060042	1	6	0.231882	0.445462	DLL1	http://amigo.geneontology.org/amigo/term/GO:0060042
negative regulation of transcription regulatory region DNA binding	Gene Ontology	GO:2000678	1	6	0.231882	0.445462	MAD2L2	http://amigo.geneontology.org/amigo/term/GO:2000678
signaling	Gene Ontology	GO:0023052	1	6	0.231882	0.445462	APPL1	http://amigo.geneontology.org/amigo/term/GO:0023052
ubiquitin-dependent protein binding	Gene Ontology	GO:0140036	1	6	0.231882	0.445462	IDE	http://amigo.geneontology.org/amigo/term/GO:0140036
negative regulation of transcription by competitive promoter binding	Gene Ontology	GO:0010944	1	6	0.231882	0.445462	MAD2L2	http://amigo.geneontology.org/amigo/term/GO:0010944
cellular phosphate ion homeostasis	Gene Ontology	GO:0030643	1	6	0.231882	0.445462	SLC34A2	http://amigo.geneontology.org/amigo/term/GO:0030643
cation transmembrane transporter activity	Gene Ontology	GO:0008324	1	6	0.231882	0.445462	SLC30A6	http://amigo.geneontology.org/amigo/term/GO:0008324
regulation of store-operated calcium entry	Gene Ontology	GO:2001256	1	6	0.231882	0.445462	SARAF	http://amigo.geneontology.org/amigo/term/GO:2001256
regulation of protein processing	Gene Ontology	GO:0070613	1	6	0.231882	0.445462	INPP5B	http://amigo.geneontology.org/amigo/term/GO:0070613
actinin binding	Gene Ontology	GO:0042805	1	6	0.231882	0.445462	RELA	http://amigo.geneontology.org/amigo/term/GO:0042805
UDP-N-acetylglucosamine biosynthetic process	Gene Ontology	GO:0006048	1	6	0.231882	0.445462	GNPDA2	http://amigo.geneontology.org/amigo/term/GO:0006048
microvillus membrane	Gene Ontology	GO:0031528	1	6	0.231882	0.445462	CTNNB1	http://amigo.geneontology.org/amigo/term/GO:0031528
regulation of voltage-gated calcium channel activity	Gene Ontology	GO:1901385	1	6	0.231882	0.445462	CACNB1	http://amigo.geneontology.org/amigo/term/GO:1901385
mitochondrial transmembrane transport	Gene Ontology	GO:1990542	1	6	0.231882	0.445462	SFXN4	http://amigo.geneontology.org/amigo/term/GO:1990542
negative regulation of cell size	Gene Ontology	GO:0045792	1	6	0.231882	0.445462	MTOR	http://amigo.geneontology.org/amigo/term/GO:0045792
negative regulation of T cell activation	Gene Ontology	GO:0050868	1	6	0.231882	0.445462	PTPN22	http://amigo.geneontology.org/amigo/term/GO:0050868
response to UV-C	Gene Ontology	GO:0010225	1	6	0.231882	0.445462	WRN	http://amigo.geneontology.org/amigo/term/GO:0010225
nonhomologous end joining complex	Gene Ontology	GO:0070419	1	6	0.231882	0.445462	PRKDC	http://amigo.geneontology.org/amigo/term/GO:0070419
myosin light chain binding	Gene Ontology	GO:0032027	1	6	0.231882	0.445462	MYH11	http://amigo.geneontology.org/amigo/term/GO:0032027
surfactant homeostasis	Gene Ontology	GO:0043129	1	6	0.231882	0.445462	EPAS1	http://amigo.geneontology.org/amigo/term/GO:0043129
positive regulation of natural killer cell mediated cytotoxicity	Gene Ontology	GO:0045954	1	6	0.231882	0.445462	IL18RAP	http://amigo.geneontology.org/amigo/term/GO:0045954
negative regulation of cell-cell adhesion mediated by cadherin	Gene Ontology	GO:2000048	1	6	0.231882	0.445462	MAD2L2	http://amigo.geneontology.org/amigo/term/GO:2000048
protein targeting to ER	Gene Ontology	GO:0045047	1	6	0.231882	0.445462	SRPRA	http://amigo.geneontology.org/amigo/term/GO:0045047
positive regulation of peptidase activity	Gene Ontology	GO:0010952	1	6	0.231882	0.445462	CLPX	http://amigo.geneontology.org/amigo/term/GO:0010952
regulation of T cell proliferation	Gene Ontology	GO:0042129	1	6	0.231882	0.445462	CTNNB1	http://amigo.geneontology.org/amigo/term/GO:0042129
ligand-gated sodium channel activity	Gene Ontology	GO:0015280	1	6	0.231882	0.445462	SCNN1A	http://amigo.geneontology.org/amigo/term/GO:0015280
eukaryotic initiation factor 4E binding	Gene Ontology	GO:0008190	1	6	0.231882	0.445462	EIF4G1	http://amigo.geneontology.org/amigo/term/GO:0008190
cranial skeletal system development	Gene Ontology	GO:1904888	1	6	0.231882	0.445462	CTNNB1	http://amigo.geneontology.org/amigo/term/GO:1904888
glycoprotein catabolic process	Gene Ontology	GO:0006516	1	6	0.231882	0.445462	NGLY1	http://amigo.geneontology.org/amigo/term/GO:0006516
posttranslational protein targeting to membrane, translocation	Gene Ontology	GO:0031204	1	6	0.231882	0.445462	SEC61A2	http://amigo.geneontology.org/amigo/term/GO:0031204
THO complex part of transcription export complex	Gene Ontology	GO:0000445	1	6	0.231882	0.445462	THOC5	http://amigo.geneontology.org/amigo/term/GO:0000445
prefoldin complex	Gene Ontology	GO:0016272	1	6	0.231882	0.445462	PDRG1	http://amigo.geneontology.org/amigo/term/GO:0016272
fatty acid transport	Gene Ontology	GO:0015908	1	6	0.231882	0.445462	PPARD	http://amigo.geneontology.org/amigo/term/GO:0015908
large ribosomal subunit	Gene Ontology	GO:0015934	1	6	0.231882	0.445462	MRPL10	http://amigo.geneontology.org/amigo/term/GO:0015934
fascia adherens	Gene Ontology	GO:0005916	1	6	0.231882	0.445462	CTNNB1	http://amigo.geneontology.org/amigo/term/GO:0005916
condensed chromosome outer kinetochore	Gene Ontology	GO:0000940	1	6	0.231882	0.445462	CENPF	http://amigo.geneontology.org/amigo/term/GO:0000940
protein hexamerization	Gene Ontology	GO:0034214	1	6	0.231882	0.445462	YME1L1	http://amigo.geneontology.org/amigo/term/GO:0034214
negative regulation of apoptotic process	Gene Ontology	GO:0043066	10	196	0.233487	0.448154	YME1L1	PHB2	HSP90B1	COPS5	PRKDC	TBX3	RELA	DDB1	MDM4	KRT18	http://amigo.geneontology.org/amigo/term/GO:0043066
cell differentiation	Gene Ontology	GO:0030154	13	266	0.235276	0.448154	ITGA8	HHEX	ILDR2	RBL1	HNF4beta	PRRC2C	NAP1L4	RB1	NR2F2	PPARD	EXT2	THOC5	ATOH8	http://amigo.geneontology.org/amigo/term/GO:0030154
phosphatidylinositol-3,4-bisphosphate binding	Gene Ontology	GO:0043325	2	23	0.235914	0.448154	HIP1	ARAP3	http://amigo.geneontology.org/amigo/term/GO:0043325
actomyosin structure organization	Gene Ontology	GO:0031032	2	23	0.235914	0.448154	EPB41L1	MYH9	http://amigo.geneontology.org/amigo/term/GO:0031032
miRNA binding	Gene Ontology	GO:0035198	2	23	0.235914	0.448154	PNPT1	SPOUT1	http://amigo.geneontology.org/amigo/term/GO:0035198
ovarian follicle development	Gene Ontology	GO:0001541	2	23	0.235914	0.448154	LFNG	SOD1	http://amigo.geneontology.org/amigo/term/GO:0001541
phospholipid metabolic process	Gene Ontology	GO:0006644	2	23	0.235914	0.448154	PLA2G2E	PLPPR3	http://amigo.geneontology.org/amigo/term/GO:0006644
dendrite morphogenesis	Gene Ontology	GO:0048813	2	23	0.235914	0.448154	ABI1	PREX2	http://amigo.geneontology.org/amigo/term/GO:0048813
adenylate cyclase-inhibiting G protein-coupled receptor signaling pathway	Gene Ontology	GO:0007193	2	23	0.235914	0.448154	PSAP	GNAI3	http://amigo.geneontology.org/amigo/term/GO:0007193
response to heat	Gene Ontology	GO:0009408	2	23	0.235914	0.448154	DNAJA2	SOD1	http://amigo.geneontology.org/amigo/term/GO:0009408
response to glucose	Gene Ontology	GO:0009749	2	23	0.235914	0.448154	GPLD1	ILDR2	http://amigo.geneontology.org/amigo/term/GO:0009749
oxidoreductase activity, acting on the CH-OH group of donors, NAD or NADP as acceptor	Gene Ontology	GO:0016616	2	23	0.235914	0.448154	CTBP1	SDR16C5	http://amigo.geneontology.org/amigo/term/GO:0016616
proximal/distal pattern formation	Gene Ontology	GO:0009954	2	23	0.235914	0.448154	CTNNB1	DLL1	http://amigo.geneontology.org/amigo/term/GO:0009954
response to calcium ion	Gene Ontology	GO:0051592	2	23	0.235914	0.448154	ANXA11	ADAM9	http://amigo.geneontology.org/amigo/term/GO:0051592
peptidyl-tyrosine dephosphorylation	Gene Ontology	GO:0035335	5	85	0.239985	0.448526	PTPN22	TNS2	PTPN11	MTMR4	CDKN3	http://amigo.geneontology.org/amigo/term/GO:0035335
defense response to bacterium	Gene Ontology	GO:0042742	3	43	0.24146	0.448526	CHGA	GNLY	STAB1	http://amigo.geneontology.org/amigo/term/GO:0042742
cytosolic large ribosomal subunit	Gene Ontology	GO:0022625	3	43	0.24146	0.448526	RPL36	RPLP0	RSL24D1	http://amigo.geneontology.org/amigo/term/GO:0022625
GTPase activator activity	Gene Ontology	GO:0005096	9	175	0.242338	0.448526	TBC1D9	ARAP3	RASGRP3	TNFAIP1	EVI5	SIPA1L1	PREX2	ARHGAP28	ARHGAP1	http://amigo.geneontology.org/amigo/term/GO:0005096
mitotic cell cycle	Gene Ontology	GO:0000278	4	64	0.243417	0.448526	CENPF	CLTCL1	TUBGCP5	TUBD1	http://amigo.geneontology.org/amigo/term/GO:0000278
phosphatidylinositol-3,4,5-trisphosphate binding	Gene Ontology	GO:0005547	2	24	0.249761	0.448526	OGT	ARAP3	http://amigo.geneontology.org/amigo/term/GO:0005547
endochondral ossification	Gene Ontology	GO:0001958	2	24	0.249761	0.448526	IFT80	INPPL1	http://amigo.geneontology.org/amigo/term/GO:0001958
transferase activity, transferring glycosyl groups	Gene Ontology	GO:0016757	2	24	0.249761	0.448526	OGT	EXT2	http://amigo.geneontology.org/amigo/term/GO:0016757
exogenous drug catabolic process	Gene Ontology	GO:0042738	2	24	0.249761	0.448526	CYP2J21	CYP2U1	http://amigo.geneontology.org/amigo/term/GO:0042738
Golgi cisterna membrane	Gene Ontology	GO:0032580	2	24	0.249761	0.448526	TMEM87A	FUT8	http://amigo.geneontology.org/amigo/term/GO:0032580
establishment of mitotic spindle orientation	Gene Ontology	GO:0000132	2	24	0.249761	0.448526	BCCIP	NDC80	http://amigo.geneontology.org/amigo/term/GO:0000132
regulation of intracellular pH	Gene Ontology	GO:0051453	2	24	0.249761	0.448526	SLC9A9	SLC4A2	http://amigo.geneontology.org/amigo/term/GO:0051453
dendrite development	Gene Ontology	GO:0016358	2	24	0.249761	0.448526	MCF2	IGSF9	http://amigo.geneontology.org/amigo/term/GO:0016358
regulation of RNA splicing	Gene Ontology	GO:0043484	2	24	0.249761	0.448526	PTBP1	METTL4	http://amigo.geneontology.org/amigo/term/GO:0043484
homeostasis of number of cells within a tissue	Gene Ontology	GO:0048873	2	24	0.249761	0.448526	PTPN11	ILDR2	http://amigo.geneontology.org/amigo/term/GO:0048873
positive regulation of inflammatory response	Gene Ontology	GO:0050729	2	24	0.249761	0.448526	ABCC1	IL1RL1	http://amigo.geneontology.org/amigo/term/GO:0050729
negative regulation of autophagy	Gene Ontology	GO:0010507	2	24	0.249761	0.448526	EIF4G1	MTOR	http://amigo.geneontology.org/amigo/term/GO:0010507
branching involved in blood vessel morphogenesis	Gene Ontology	GO:0001569	2	24	0.249761	0.448526	CTNNB1	DLL4	http://amigo.geneontology.org/amigo/term/GO:0001569
cell leading edge	Gene Ontology	GO:0031252	2	24	0.249761	0.448526	RAPH1	MYH9	http://amigo.geneontology.org/amigo/term/GO:0031252
neuromuscular junction development	Gene Ontology	GO:0007528	2	24	0.249761	0.448526	ERBB2	CACNB1	http://amigo.geneontology.org/amigo/term/GO:0007528
axonogenesis	Gene Ontology	GO:0007409	3	44	0.25144	0.448526	PTPN11	TOP2B	CDK5	http://amigo.geneontology.org/amigo/term/GO:0007409
substrate adhesion-dependent cell spreading	Gene Ontology	GO:0034446	3	44	0.25144	0.448526	ITGA8	PARVB	LPXN	http://amigo.geneontology.org/amigo/term/GO:0034446
kidney development	Gene Ontology	GO:0001822	3	44	0.25144	0.448526	CENPF	SGPL1	AGT	http://amigo.geneontology.org/amigo/term/GO:0001822
sequence-specific DNA binding	Gene Ontology	GO:0043565	9	177	0.25191	0.448526	UBP1	HHEX	ASPM	ZNF711	CSRNP2	NR2F2	TBX3	GATAD2B	FOXN3	http://amigo.geneontology.org/amigo/term/GO:0043565
calmodulin binding	Gene Ontology	GO:0005516	5	87	0.253887	0.448526	MYH11	MYH9	ASPM	KCNN1	SPTAN1	http://amigo.geneontology.org/amigo/term/GO:0005516
positive regulation of B cell differentiation	Gene Ontology	GO:0045579	1	7	0.260297	0.448526	ATP11C	http://amigo.geneontology.org/amigo/term/GO:0045579
positive regulation of phagocytosis, engulfment	Gene Ontology	GO:0060100	1	7	0.260297	0.448526	C3	http://amigo.geneontology.org/amigo/term/GO:0060100
respiratory burst	Gene Ontology	GO:0045730	1	7	0.260297	0.448526	CYBA	http://amigo.geneontology.org/amigo/term/GO:0045730
neurofilament cytoskeleton organization	Gene Ontology	GO:0060052	1	7	0.260297	0.448526	SOD1	http://amigo.geneontology.org/amigo/term/GO:0060052
cellular response to exogenous dsRNA	Gene Ontology	GO:0071360	1	7	0.260297	0.448526	IFIH1	http://amigo.geneontology.org/amigo/term/GO:0071360
Notch receptor processing	Gene Ontology	GO:0007220	1	7	0.260297	0.448526	APH1A	http://amigo.geneontology.org/amigo/term/GO:0007220
extrinsic component of endosome membrane	Gene Ontology	GO:0031313	1	7	0.260297	0.448526	WDR91	http://amigo.geneontology.org/amigo/term/GO:0031313
viral budding	Gene Ontology	GO:0046755	1	7	0.260297	0.448526	LRSAM1	http://amigo.geneontology.org/amigo/term/GO:0046755
nucleotide-activated protein kinase complex	Gene Ontology	GO:0031588	1	7	0.260297	0.448526	PRKAG2	http://amigo.geneontology.org/amigo/term/GO:0031588
NMDA selective glutamate receptor complex	Gene Ontology	GO:0017146	1	7	0.260297	0.448526	GRIN2A	http://amigo.geneontology.org/amigo/term/GO:0017146
positive regulation of myotube differentiation	Gene Ontology	GO:0010831	1	7	0.260297	0.448526	MTOR	http://amigo.geneontology.org/amigo/term/GO:0010831
UTP biosynthetic process	Gene Ontology	GO:0006228	1	7	0.260297	0.448526	NME3	http://amigo.geneontology.org/amigo/term/GO:0006228
positive regulation by host of viral genome replication	Gene Ontology	GO:0044829	1	7	0.260297	0.448526	NUCKS1	http://amigo.geneontology.org/amigo/term/GO:0044829
innate immune response in mucosa	Gene Ontology	GO:0002227	1	7	0.260297	0.448526	FAU	http://amigo.geneontology.org/amigo/term/GO:0002227
cellular response to hydroxyurea	Gene Ontology	GO:0072711	1	7	0.260297	0.448526	ATRX	http://amigo.geneontology.org/amigo/term/GO:0072711
axon extension involved in axon guidance	Gene Ontology	GO:0048846	1	7	0.260297	0.448526	ALCAM	http://amigo.geneontology.org/amigo/term/GO:0048846
positive regulation of macrophage activation	Gene Ontology	GO:0043032	1	7	0.260297	0.448526	IL1RL1	http://amigo.geneontology.org/amigo/term/GO:0043032
removal of superoxide radicals	Gene Ontology	GO:0019430	1	7	0.260297	0.448526	SOD1	http://amigo.geneontology.org/amigo/term/GO:0019430
positive regulation of response to DNA damage stimulus	Gene Ontology	GO:2001022	1	7	0.260297	0.448526	PAXIP1	http://amigo.geneontology.org/amigo/term/GO:2001022
xenobiotic transport	Gene Ontology	GO:0042908	1	7	0.260297	0.448526	ABCC1	http://amigo.geneontology.org/amigo/term/GO:0042908
TORC1 complex	Gene Ontology	GO:0031931	1	7	0.260297	0.448526	MTOR	http://amigo.geneontology.org/amigo/term/GO:0031931
positive regulation of receptor recycling	Gene Ontology	GO:0001921	1	7	0.260297	0.448526	INPP5F	http://amigo.geneontology.org/amigo/term/GO:0001921
positive regulation of embryonic development	Gene Ontology	GO:0040019	1	7	0.260297	0.448526	DIEXF	http://amigo.geneontology.org/amigo/term/GO:0040019
regulation of microtubule polymerization	Gene Ontology	GO:0031113	1	7	0.260297	0.448526	PRUNE1	http://amigo.geneontology.org/amigo/term/GO:0031113
enoyl-CoA hydratase activity	Gene Ontology	GO:0004300	1	7	0.260297	0.448526	ECI1	http://amigo.geneontology.org/amigo/term/GO:0004300
response to organic substance	Gene Ontology	GO:0010033	1	7	0.260297	0.448526	GLRX2	http://amigo.geneontology.org/amigo/term/GO:0010033
heparan sulfate proteoglycan biosynthetic process, polysaccharide chain biosynthetic process	Gene Ontology	GO:0015014	1	7	0.260297	0.448526	EXT2	http://amigo.geneontology.org/amigo/term/GO:0015014
pseudopodium	Gene Ontology	GO:0031143	1	7	0.260297	0.448526	ACTN4	http://amigo.geneontology.org/amigo/term/GO:0031143
intraciliary transport involved in cilium assembly	Gene Ontology	GO:0035735	1	7	0.260297	0.448526	PCM1	http://amigo.geneontology.org/amigo/term/GO:0035735
ribosomal small subunit biogenesis	Gene Ontology	GO:0042274	1	7	0.260297	0.448526	NPM1	http://amigo.geneontology.org/amigo/term/GO:0042274
regulation of mitotic metaphase/anaphase transition	Gene Ontology	GO:0030071	1	7	0.260297	0.448526	NEK6	http://amigo.geneontology.org/amigo/term/GO:0030071
aldehyde dehydrogenase (NAD+) activity	Gene Ontology	GO:0004029	1	7	0.260297	0.448526	ALDH9A1	http://amigo.geneontology.org/amigo/term/GO:0004029
positive regulation of megakaryocyte differentiation	Gene Ontology	GO:0045654	1	7	0.260297	0.448526	SCIN	http://amigo.geneontology.org/amigo/term/GO:0045654
primary miRNA binding	Gene Ontology	GO:0070878	1	7	0.260297	0.448526	EZH2	http://amigo.geneontology.org/amigo/term/GO:0070878
Golgi-associated vesicle membrane	Gene Ontology	GO:0030660	1	7	0.260297	0.448526	SPPL2A	http://amigo.geneontology.org/amigo/term/GO:0030660
sphingomyelin catabolic process	Gene Ontology	GO:0006685	1	7	0.260297	0.448526	SMPD1	http://amigo.geneontology.org/amigo/term/GO:0006685
positive regulation of autophagosome assembly	Gene Ontology	GO:2000786	1	7	0.260297	0.448526	LRSAM1	http://amigo.geneontology.org/amigo/term/GO:2000786
dystroglycan binding	Gene Ontology	GO:0002162	1	7	0.260297	0.448526	CLASP1	http://amigo.geneontology.org/amigo/term/GO:0002162
calcium transmembrane transporter activity, phosphorylative mechanism	Gene Ontology	GO:0005388	1	7	0.260297	0.448526	ATP2A3	http://amigo.geneontology.org/amigo/term/GO:0005388
regulation of postsynaptic cytosolic calcium ion concentration	Gene Ontology	GO:0099566	1	7	0.260297	0.448526	ITPR1	http://amigo.geneontology.org/amigo/term/GO:0099566
positive regulation of cell-cell adhesion	Gene Ontology	GO:0022409	1	7	0.260297	0.448526	MAGI1	http://amigo.geneontology.org/amigo/term/GO:0022409
sodium ion homeostasis	Gene Ontology	GO:0055078	1	7	0.260297	0.448526	SCNN1A	http://amigo.geneontology.org/amigo/term/GO:0055078
histone acetyltransferase activity (H4-K5 specific)	Gene Ontology	GO:0043995	1	7	0.260297	0.448526	OGT	http://amigo.geneontology.org/amigo/term/GO:0043995
insulin-responsive compartment	Gene Ontology	GO:0032593	1	7	0.260297	0.448526	RAB12	http://amigo.geneontology.org/amigo/term/GO:0032593
histone acetyltransferase activity (H4-K8 specific)	Gene Ontology	GO:0043996	1	7	0.260297	0.448526	OGT	http://amigo.geneontology.org/amigo/term/GO:0043996
small ribosomal subunit	Gene Ontology	GO:0015935	1	7	0.260297	0.448526	RPS16	http://amigo.geneontology.org/amigo/term/GO:0015935
chloride channel inhibitor activity	Gene Ontology	GO:0019869	1	7	0.260297	0.448526	STX8	http://amigo.geneontology.org/amigo/term/GO:0019869
dolichol-linked oligosaccharide biosynthetic process	Gene Ontology	GO:0006488	1	7	0.260297	0.448526	RFT1	http://amigo.geneontology.org/amigo/term/GO:0006488
ubiquitin ligase-substrate adaptor activity	Gene Ontology	GO:1990756	1	7	0.260297	0.448526	HERPUD1	http://amigo.geneontology.org/amigo/term/GO:1990756
response to UV-B	Gene Ontology	GO:0010224	1	7	0.260297	0.448526	RELA	http://amigo.geneontology.org/amigo/term/GO:0010224
multicellular organismal iron ion homeostasis	Gene Ontology	GO:0060586	1	7	0.260297	0.448526	RHAG	http://amigo.geneontology.org/amigo/term/GO:0060586
negative regulation of cardiac muscle cell proliferation	Gene Ontology	GO:0060044	1	7	0.260297	0.448526	MAPK11	http://amigo.geneontology.org/amigo/term/GO:0060044
parathyroid gland development	Gene Ontology	GO:0060017	1	7	0.260297	0.448526	HOXA3	http://amigo.geneontology.org/amigo/term/GO:0060017
positive regulation of toll-like receptor 4 signaling pathway	Gene Ontology	GO:0034145	1	7	0.260297	0.448526	PTPN22	http://amigo.geneontology.org/amigo/term/GO:0034145
regulation of release of sequestered calcium ion into cytosol by sarcoplasmic reticulum	Gene Ontology	GO:0010880	1	7	0.260297	0.448526	CHD7	http://amigo.geneontology.org/amigo/term/GO:0010880
embryonic foregut morphogenesis	Gene Ontology	GO:0048617	1	7	0.260297	0.448526	CTNNB1	http://amigo.geneontology.org/amigo/term/GO:0048617
positive regulation of RNA polymerase II transcription preinitiation complex assembly	Gene Ontology	GO:0045899	1	7	0.260297	0.448526	PSMC6	http://amigo.geneontology.org/amigo/term/GO:0045899
regulation of gastrulation	Gene Ontology	GO:0010470	1	7	0.260297	0.448526	CLASP1	http://amigo.geneontology.org/amigo/term/GO:0010470
diet induced thermogenesis	Gene Ontology	GO:0002024	1	7	0.260297	0.448526	ADRB1	http://amigo.geneontology.org/amigo/term/GO:0002024
positive regulation of transcription of nucleolar large rRNA by RNA polymerase I	Gene Ontology	GO:1901838	1	7	0.260297	0.448526	MTOR	http://amigo.geneontology.org/amigo/term/GO:1901838
muscle cell differentiation	Gene Ontology	GO:0042692	1	7	0.260297	0.448526	H3F3B	http://amigo.geneontology.org/amigo/term/GO:0042692
1-phosphatidylinositol-4-phosphate 3-kinase activity	Gene Ontology	GO:0035005	1	7	0.260297	0.448526	PIK3CA	http://amigo.geneontology.org/amigo/term/GO:0035005
adherens junction assembly	Gene Ontology	GO:0034333	1	7	0.260297	0.448526	CTNNB1	http://amigo.geneontology.org/amigo/term/GO:0034333
myosin light chain kinase activity	Gene Ontology	GO:0004687	1	7	0.260297	0.448526	MYLK3	http://amigo.geneontology.org/amigo/term/GO:0004687
DNA topological change	Gene Ontology	GO:0006265	1	7	0.260297	0.448526	TOP2B	http://amigo.geneontology.org/amigo/term/GO:0006265
cardiac muscle cell development	Gene Ontology	GO:0055013	1	7	0.260297	0.448526	MTOR	http://amigo.geneontology.org/amigo/term/GO:0055013
DNA replication-independent nucleosome assembly	Gene Ontology	GO:0006336	1	7	0.260297	0.448526	ATRX	http://amigo.geneontology.org/amigo/term/GO:0006336
microtubule nucleation	Gene Ontology	GO:0007020	1	7	0.260297	0.448526	CLASP1	http://amigo.geneontology.org/amigo/term/GO:0007020
negative regulation of bone resorption	Gene Ontology	GO:0045779	1	7	0.260297	0.448526	GPR137B	http://amigo.geneontology.org/amigo/term/GO:0045779
liver regeneration	Gene Ontology	GO:0097421	1	7	0.260297	0.448526	EZH2	http://amigo.geneontology.org/amigo/term/GO:0097421
response to axon injury	Gene Ontology	GO:0048678	1	7	0.260297	0.448526	SOD1	http://amigo.geneontology.org/amigo/term/GO:0048678
proteasome core complex, alpha-subunit complex	Gene Ontology	GO:0019773	1	7	0.260297	0.448526	PSMA3	http://amigo.geneontology.org/amigo/term/GO:0019773
negative regulation of calcium ion transport	Gene Ontology	GO:0051926	1	7	0.260297	0.448526	PACSIN3	http://amigo.geneontology.org/amigo/term/GO:0051926
alpha-catenin binding	Gene Ontology	GO:0045294	1	7	0.260297	0.448526	CTNNB1	http://amigo.geneontology.org/amigo/term/GO:0045294
3'-UTR-mediated mRNA stabilization	Gene Ontology	GO:0070935	1	7	0.260297	0.448526	ANGEL2	http://amigo.geneontology.org/amigo/term/GO:0070935
inositol hexakisphosphate kinase activity	Gene Ontology	GO:0000828	1	7	0.260297	0.448526	PPIP5K1	http://amigo.geneontology.org/amigo/term/GO:0000828
negative regulation of nitric oxide biosynthetic process	Gene Ontology	GO:0045019	1	7	0.260297	0.448526	ACP5	http://amigo.geneontology.org/amigo/term/GO:0045019
protein-glutamine gamma-glutamyltransferase activity	Gene Ontology	GO:0003810	1	7	0.260297	0.448526	TGM2	http://amigo.geneontology.org/amigo/term/GO:0003810
microtubule organizing center organization	Gene Ontology	GO:0031023	1	7	0.260297	0.448526	CLASP1	http://amigo.geneontology.org/amigo/term/GO:0031023
production of miRNAs involved in gene silencing by miRNA	Gene Ontology	GO:0035196	1	7	0.260297	0.448526	SPOUT1	http://amigo.geneontology.org/amigo/term/GO:0035196
cholesterol transport	Gene Ontology	GO:0030301	1	7	0.260297	0.448526	STARD3	http://amigo.geneontology.org/amigo/term/GO:0030301
negative regulation of tumor necrosis factor-mediated signaling pathway	Gene Ontology	GO:0010804	1	7	0.260297	0.448526	CCDC3	http://amigo.geneontology.org/amigo/term/GO:0010804
phosphatidylinositol-4,5-bisphosphate 5-phosphatase activity	Gene Ontology	GO:0004439	1	7	0.260297	0.448526	INPP5B	http://amigo.geneontology.org/amigo/term/GO:0004439
attachment of mitotic spindle microtubules to kinetochore	Gene Ontology	GO:0051315	1	7	0.260297	0.448526	NDC80	http://amigo.geneontology.org/amigo/term/GO:0051315
metanephric collecting duct development	Gene Ontology	GO:0072205	1	7	0.260297	0.448526	DLG5	http://amigo.geneontology.org/amigo/term/GO:0072205
neurotrophin TRK receptor signaling pathway	Gene Ontology	GO:0048011	1	7	0.260297	0.448526	PTPN11	http://amigo.geneontology.org/amigo/term/GO:0048011
negative regulation of satellite cell differentiation	Gene Ontology	GO:1902725	1	7	0.260297	0.448526	SDC4	http://amigo.geneontology.org/amigo/term/GO:1902725
positive regulation of ubiquitin protein ligase activity	Gene Ontology	GO:1904668	1	7	0.260297	0.448526	UBE2S	http://amigo.geneontology.org/amigo/term/GO:1904668
cellular response to X-ray	Gene Ontology	GO:0071481	1	7	0.260297	0.448526	NUCKS1	http://amigo.geneontology.org/amigo/term/GO:0071481
meiotic spindle	Gene Ontology	GO:0072687	1	7	0.260297	0.448526	ASPM	http://amigo.geneontology.org/amigo/term/GO:0072687
sexual reproduction	Gene Ontology	GO:0019953	1	7	0.260297	0.448526	EIF4H	http://amigo.geneontology.org/amigo/term/GO:0019953
cyclin-dependent protein serine/threonine kinase activator activity	Gene Ontology	GO:0061575	1	7	0.260297	0.448526	CCNT1	http://amigo.geneontology.org/amigo/term/GO:0061575
positive regulation of DNA-templated transcription, initiation	Gene Ontology	GO:2000144	1	7	0.260297	0.448526	CTNNB1	http://amigo.geneontology.org/amigo/term/GO:2000144
white fat cell differentiation	Gene Ontology	GO:0050872	1	7	0.260297	0.448526	CTBP1	http://amigo.geneontology.org/amigo/term/GO:0050872
peptidase activator activity	Gene Ontology	GO:0016504	1	7	0.260297	0.448526	CLPX	http://amigo.geneontology.org/amigo/term/GO:0016504
protein deneddylation	Gene Ontology	GO:0000338	1	7	0.260297	0.448526	COPS5	http://amigo.geneontology.org/amigo/term/GO:0000338
centriole-centriole cohesion	Gene Ontology	GO:0010457	1	7	0.260297	0.448526	NIN	http://amigo.geneontology.org/amigo/term/GO:0010457
neural crest formation	Gene Ontology	GO:0014029	1	7	0.260297	0.448526	LRP6	http://amigo.geneontology.org/amigo/term/GO:0014029
-	Gene Ontology	GO:0042629	1	7	0.260297	0.448526	CHGA	http://amigo.geneontology.org/amigo/term/GO:0042629
microtubule polymerization	Gene Ontology	GO:0046785	1	7	0.260297	0.448526	MAPRE1	http://amigo.geneontology.org/amigo/term/GO:0046785
negative regulation of interleukin-12 production	Gene Ontology	GO:0032695	1	7	0.260297	0.448526	ACP5	http://amigo.geneontology.org/amigo/term/GO:0032695
glucose binding	Gene Ontology	GO:0005536	1	7	0.260297	0.448526	HK2	http://amigo.geneontology.org/amigo/term/GO:0005536
killing of cells of other organism	Gene Ontology	GO:0031640	1	7	0.260297	0.448526	GNLY	http://amigo.geneontology.org/amigo/term/GO:0031640
membrane protein proteolysis	Gene Ontology	GO:0033619	1	7	0.260297	0.448526	SPPL2A	http://amigo.geneontology.org/amigo/term/GO:0033619
Wnt signaling pathway, planar cell polarity pathway	Gene Ontology	GO:0060071	1	7	0.260297	0.448526	MED12	http://amigo.geneontology.org/amigo/term/GO:0060071
negative regulation of epithelial cell differentiation	Gene Ontology	GO:0030857	1	7	0.260297	0.448526	TBX3	http://amigo.geneontology.org/amigo/term/GO:0030857
very long-chain fatty acid-CoA ligase activity	Gene Ontology	GO:0031957	1	7	0.260297	0.448526	SLC27A4	http://amigo.geneontology.org/amigo/term/GO:0031957
protein kinase B binding	Gene Ontology	GO:0043422	1	7	0.260297	0.448526	APPL1	http://amigo.geneontology.org/amigo/term/GO:0043422
regulation of osteoclast differentiation	Gene Ontology	GO:0045670	1	7	0.260297	0.448526	MTOR	http://amigo.geneontology.org/amigo/term/GO:0045670
fatty acid beta-oxidation using acyl-CoA dehydrogenase	Gene Ontology	GO:0033539	1	7	0.260297	0.448526	ACADS	http://amigo.geneontology.org/amigo/term/GO:0033539
regulation of Rac protein signal transduction	Gene Ontology	GO:0035020	1	7	0.260297	0.448526	OGT	http://amigo.geneontology.org/amigo/term/GO:0035020
isoprenoid biosynthetic process	Gene Ontology	GO:0008299	1	7	0.260297	0.448526	GGPS1	http://amigo.geneontology.org/amigo/term/GO:0008299
ER membrane protein complex	Gene Ontology	GO:0072546	1	7	0.260297	0.448526	EMC1	http://amigo.geneontology.org/amigo/term/GO:0072546
response to steroid hormone	Gene Ontology	GO:0048545	1	7	0.260297	0.448526	ABCA2	http://amigo.geneontology.org/amigo/term/GO:0048545
cellular response to heat	Gene Ontology	GO:0034605	2	25	0.263629	0.451187	IER5	DHX36	http://amigo.geneontology.org/amigo/term/GO:0034605
integral component of mitochondrial inner membrane	Gene Ontology	GO:0031305	2	25	0.263629	0.451187	SFXN4	AGK	http://amigo.geneontology.org/amigo/term/GO:0031305
face morphogenesis	Gene Ontology	GO:0060325	2	25	0.263629	0.451187	PTPN11	SGPL1	http://amigo.geneontology.org/amigo/term/GO:0060325
sperm flagellum	Gene Ontology	GO:0036126	2	25	0.263629	0.451187	CCDC181	CFAP70	http://amigo.geneontology.org/amigo/term/GO:0036126
positive regulation of G1/S transition of mitotic cell cycle	Gene Ontology	GO:1900087	2	25	0.263629	0.451187	CDC45	EIF4G1	http://amigo.geneontology.org/amigo/term/GO:1900087
aggresome	Gene Ontology	GO:0016235	2	25	0.263629	0.451187	ABI1	EEF2	http://amigo.geneontology.org/amigo/term/GO:0016235
cytokine-mediated signaling pathway	Gene Ontology	GO:0019221	4	68	0.276138	0.451187	IFNAR2	FLT3	IFNGR2	IL2RG	http://amigo.geneontology.org/amigo/term/GO:0019221
ion channel binding	Gene Ontology	GO:0044325	4	68	0.276138	0.451187	CTNNB1	HERPUD1	ATP2A3	ACTN4	http://amigo.geneontology.org/amigo/term/GO:0044325
positive regulation of actin filament polymerization	Gene Ontology	GO:0030838	2	26	0.277499	0.451187	MTOR	BAG4	http://amigo.geneontology.org/amigo/term/GO:0030838
positive regulation of tumor necrosis factor production	Gene Ontology	GO:0032760	2	26	0.277499	0.451187	PTPN11	CYBA	http://amigo.geneontology.org/amigo/term/GO:0032760
inner ear development	Gene Ontology	GO:0048839	2	26	0.277499	0.451187	DLL1	PTPN11	http://amigo.geneontology.org/amigo/term/GO:0048839
DNA helicase activity	Gene Ontology	GO:0003678	2	26	0.277499	0.451187	DHX36	CHD7	http://amigo.geneontology.org/amigo/term/GO:0003678
nucleosome	Gene Ontology	GO:0000786	2	26	0.277499	0.451187	SHPRH	H3F3B	http://amigo.geneontology.org/amigo/term/GO:0000786
camera-type eye development	Gene Ontology	GO:0043010	2	26	0.277499	0.451187	LAMA1	PKNOX1	http://amigo.geneontology.org/amigo/term/GO:0043010
protein K48-linked deubiquitination	Gene Ontology	GO:0071108	2	26	0.277499	0.451187	OTUD7B	USP20	http://amigo.geneontology.org/amigo/term/GO:0071108
cell maturation	Gene Ontology	GO:0048469	2	26	0.277499	0.451187	CTNNB1	EPAS1	http://amigo.geneontology.org/amigo/term/GO:0048469
regulation of phosphoprotein phosphatase activity	Gene Ontology	GO:0043666	2	26	0.277499	0.451187	HSP90B1	PPP1R2	http://amigo.geneontology.org/amigo/term/GO:0043666
protein K63-linked ubiquitination	Gene Ontology	GO:0070534	2	26	0.277499	0.451187	UBE2S	WWP2	http://amigo.geneontology.org/amigo/term/GO:0070534
positive regulation of smoothened signaling pathway	Gene Ontology	GO:0045880	2	26	0.277499	0.451187	DLG5	ARMC9	http://amigo.geneontology.org/amigo/term/GO:0045880
cytoplasmic side of plasma membrane	Gene Ontology	GO:0009898	2	26	0.277499	0.451187	PTPN22	PKP4	http://amigo.geneontology.org/amigo/term/GO:0009898
phagocytosis	Gene Ontology	GO:0006909	2	26	0.277499	0.451187	ANXA11	UNC13D	http://amigo.geneontology.org/amigo/term/GO:0006909
positive regulation of ERK1 and ERK2 cascade	Gene Ontology	GO:0070374	6	114	0.284395	0.451187	PTPN22	GCNT2	PHB2	PTPN11	PLA2G2E	NOX4	http://amigo.geneontology.org/amigo/term/GO:0070374
plasminogen activation	Gene Ontology	GO:0031639	1	8	0.287661	0.451187	PLAU	http://amigo.geneontology.org/amigo/term/GO:0031639
autolysosome	Gene Ontology	GO:0044754	1	8	0.287661	0.451187	MAP1LC3A	http://amigo.geneontology.org/amigo/term/GO:0044754
nucleus localization	Gene Ontology	GO:0051647	1	8	0.287661	0.451187	MTOR	http://amigo.geneontology.org/amigo/term/GO:0051647
blood vessel endothelial cell migration	Gene Ontology	GO:0043534	1	8	0.287661	0.451187	MYH9	http://amigo.geneontology.org/amigo/term/GO:0043534
ionotropic glutamate receptor binding	Gene Ontology	GO:0035255	1	8	0.287661	0.451187	NETO2	http://amigo.geneontology.org/amigo/term/GO:0035255
sympathetic ganglion development	Gene Ontology	GO:0061549	1	8	0.287661	0.451187	CTNNB1	http://amigo.geneontology.org/amigo/term/GO:0061549
smooth muscle cell differentiation	Gene Ontology	GO:0051145	1	8	0.287661	0.451187	CTNNB1	http://amigo.geneontology.org/amigo/term/GO:0051145
nuclear inclusion body	Gene Ontology	GO:0042405	1	8	0.287661	0.451187	NUP98	http://amigo.geneontology.org/amigo/term/GO:0042405
long-chain fatty acid biosynthetic process	Gene Ontology	GO:0042759	1	8	0.287661	0.451187	ELOVL5	http://amigo.geneontology.org/amigo/term/GO:0042759
astrocyte development	Gene Ontology	GO:0014002	1	8	0.287661	0.451187	DLL1	http://amigo.geneontology.org/amigo/term/GO:0014002
intraciliary retrograde transport	Gene Ontology	GO:0035721	1	8	0.287661	0.451187	ICK	http://amigo.geneontology.org/amigo/term/GO:0035721
regulation of protein ubiquitination	Gene Ontology	GO:0031396	1	8	0.287661	0.451187	HERPUD1	http://amigo.geneontology.org/amigo/term/GO:0031396
cardiac myofibril assembly	Gene Ontology	GO:0055003	1	8	0.287661	0.451187	MYLK3	http://amigo.geneontology.org/amigo/term/GO:0055003
RNA export from nucleus	Gene Ontology	GO:0006405	1	8	0.287661	0.451187	NUP214	http://amigo.geneontology.org/amigo/term/GO:0006405
N-acetylglucosamine metabolic process	Gene Ontology	GO:0006044	1	8	0.287661	0.451187	CHST6	http://amigo.geneontology.org/amigo/term/GO:0006044
induction of positive chemotaxis	Gene Ontology	GO:0050930	1	8	0.287661	0.451187	VEGFA	http://amigo.geneontology.org/amigo/term/GO:0050930
positive regulation of dendritic spine development	Gene Ontology	GO:0060999	1	8	0.287661	0.451187	DLG5	http://amigo.geneontology.org/amigo/term/GO:0060999
lateral element	Gene Ontology	GO:0000800	1	8	0.287661	0.451187	BRCA1	http://amigo.geneontology.org/amigo/term/GO:0000800
cation transport	Gene Ontology	GO:0006812	1	8	0.287661	0.451187	PANX1	http://amigo.geneontology.org/amigo/term/GO:0006812
potassium ion binding	Gene Ontology	GO:0030955	1	8	0.287661	0.451187	ADPRH	http://amigo.geneontology.org/amigo/term/GO:0030955
MOZ/MORF histone acetyltransferase complex	Gene Ontology	GO:0070776	1	8	0.287661	0.451187	ING5	http://amigo.geneontology.org/amigo/term/GO:0070776
transcription preinitiation complex	Gene Ontology	GO:0097550	1	8	0.287661	0.451187	GTF2E1	http://amigo.geneontology.org/amigo/term/GO:0097550
histone H2B ubiquitination	Gene Ontology	GO:0033523	1	8	0.287661	0.451187	CTR9	http://amigo.geneontology.org/amigo/term/GO:0033523
regulation of transforming growth factor beta receptor signaling pathway	Gene Ontology	GO:0017015	1	8	0.287661	0.451187	ITGA3	http://amigo.geneontology.org/amigo/term/GO:0017015
telomere maintenance via recombination	Gene Ontology	GO:0000722	1	8	0.287661	0.451187	XRCC3	http://amigo.geneontology.org/amigo/term/GO:0000722
startle response	Gene Ontology	GO:0001964	1	8	0.287661	0.451187	GRIN2A	http://amigo.geneontology.org/amigo/term/GO:0001964
endoplasmic reticulum chaperone complex	Gene Ontology	GO:0034663	1	8	0.287661	0.451187	HSP90B1	http://amigo.geneontology.org/amigo/term/GO:0034663
protein mono-ADP-ribosylation	Gene Ontology	GO:0140289	1	8	0.287661	0.451187	PARP3	http://amigo.geneontology.org/amigo/term/GO:0140289
lipid phosphatase activity	Gene Ontology	GO:0042577	1	8	0.287661	0.451187	PLPPR3	http://amigo.geneontology.org/amigo/term/GO:0042577
positive regulation of transcription by RNA polymerase I	Gene Ontology	GO:0045943	1	8	0.287661	0.451187	ERBB2	http://amigo.geneontology.org/amigo/term/GO:0045943
natural killer cell differentiation	Gene Ontology	GO:0001779	1	8	0.287661	0.451187	SP3	http://amigo.geneontology.org/amigo/term/GO:0001779
regulation of proteasomal ubiquitin-dependent protein catabolic process	Gene Ontology	GO:0032434	1	8	0.287661	0.451187	UFL1	http://amigo.geneontology.org/amigo/term/GO:0032434
positive regulation of viral release from host cell	Gene Ontology	GO:1902188	1	8	0.287661	0.451187	DDB1	http://amigo.geneontology.org/amigo/term/GO:1902188
formation of translation preinitiation complex	Gene Ontology	GO:0001731	1	8	0.287661	0.451187	EIF4H	http://amigo.geneontology.org/amigo/term/GO:0001731
clathrin heavy chain binding	Gene Ontology	GO:0032050	1	8	0.287661	0.451187	SNAP91	http://amigo.geneontology.org/amigo/term/GO:0032050
L-glutamate transmembrane transport	Gene Ontology	GO:0015813	1	8	0.287661	0.451187	ARL6IP5	http://amigo.geneontology.org/amigo/term/GO:0015813
hepatocyte differentiation	Gene Ontology	GO:0070365	1	8	0.287661	0.451187	HHEX	http://amigo.geneontology.org/amigo/term/GO:0070365
intrinsic component of plasma membrane	Gene Ontology	GO:0031226	1	8	0.287661	0.451187	TGM2	http://amigo.geneontology.org/amigo/term/GO:0031226
cellular response to stress	Gene Ontology	GO:0033554	1	8	0.287661	0.451187	RELA	http://amigo.geneontology.org/amigo/term/GO:0033554
nuclear pore nuclear basket	Gene Ontology	GO:0044615	1	8	0.287661	0.451187	NUP98	http://amigo.geneontology.org/amigo/term/GO:0044615
regulation of insulin receptor signaling pathway	Gene Ontology	GO:0046626	1	8	0.287661	0.451187	OGT	http://amigo.geneontology.org/amigo/term/GO:0046626
homocysteine metabolic process	Gene Ontology	GO:0050667	1	8	0.287661	0.451187	NOX4	http://amigo.geneontology.org/amigo/term/GO:0050667
calcium-dependent phospholipase A2 activity	Gene Ontology	GO:0047498	1	8	0.287661	0.451187	PLA2G2E	http://amigo.geneontology.org/amigo/term/GO:0047498
proteasome assembly	Gene Ontology	GO:0043248	1	8	0.287661	0.451187	POMP	http://amigo.geneontology.org/amigo/term/GO:0043248
regulation of mast cell degranulation	Gene Ontology	GO:0043304	1	8	0.287661	0.451187	UNC13D	http://amigo.geneontology.org/amigo/term/GO:0043304
nucleosome disassembly	Gene Ontology	GO:0006337	1	8	0.287661	0.451187	SMARCC1	http://amigo.geneontology.org/amigo/term/GO:0006337
ribosomal large subunit export from nucleus	Gene Ontology	GO:0000055	1	8	0.287661	0.451187	NPM1	http://amigo.geneontology.org/amigo/term/GO:0000055
neuron-neuron synaptic transmission	Gene Ontology	GO:0007270	1	8	0.287661	0.451187	VDAC3	http://amigo.geneontology.org/amigo/term/GO:0007270
keratinocyte proliferation	Gene Ontology	GO:0043616	1	8	0.287661	0.451187	PPARD	http://amigo.geneontology.org/amigo/term/GO:0043616
tubulin-glutamic acid ligase activity	Gene Ontology	GO:0070740	1	8	0.287661	0.451187	TTLL9	http://amigo.geneontology.org/amigo/term/GO:0070740
apical protein localization	Gene Ontology	GO:0045176	1	8	0.287661	0.451187	DLG5	http://amigo.geneontology.org/amigo/term/GO:0045176
MHC class II protein complex	Gene Ontology	GO:0042613	1	8	0.287661	0.451187	BLB1	http://amigo.geneontology.org/amigo/term/GO:0042613
GTP biosynthetic process	Gene Ontology	GO:0006183	1	8	0.287661	0.451187	NME3	http://amigo.geneontology.org/amigo/term/GO:0006183
inositol 1,4,5 trisphosphate binding	Gene Ontology	GO:0070679	1	8	0.287661	0.451187	ITPR1	http://amigo.geneontology.org/amigo/term/GO:0070679
lamin binding	Gene Ontology	GO:0005521	1	8	0.287661	0.451187	SUN2	http://amigo.geneontology.org/amigo/term/GO:0005521
small ribosomal subunit rRNA binding	Gene Ontology	GO:0070181	1	8	0.287661	0.451187	UTP23	http://amigo.geneontology.org/amigo/term/GO:0070181
tube formation	Gene Ontology	GO:0035148	1	8	0.287661	0.451187	ATOH8	http://amigo.geneontology.org/amigo/term/GO:0035148
[truncated: 1,008 more rows]
[truncated: 137 more columns]
