# Supplementary figures and images for: Identification of SNPs Related to Salmonella Resistance in Chickens Using RNA-Seq and Integrated Bioinformatics Approach
Source: MDPI journal article supplement (doi:10.3390/genes14061283), 2023-06-17

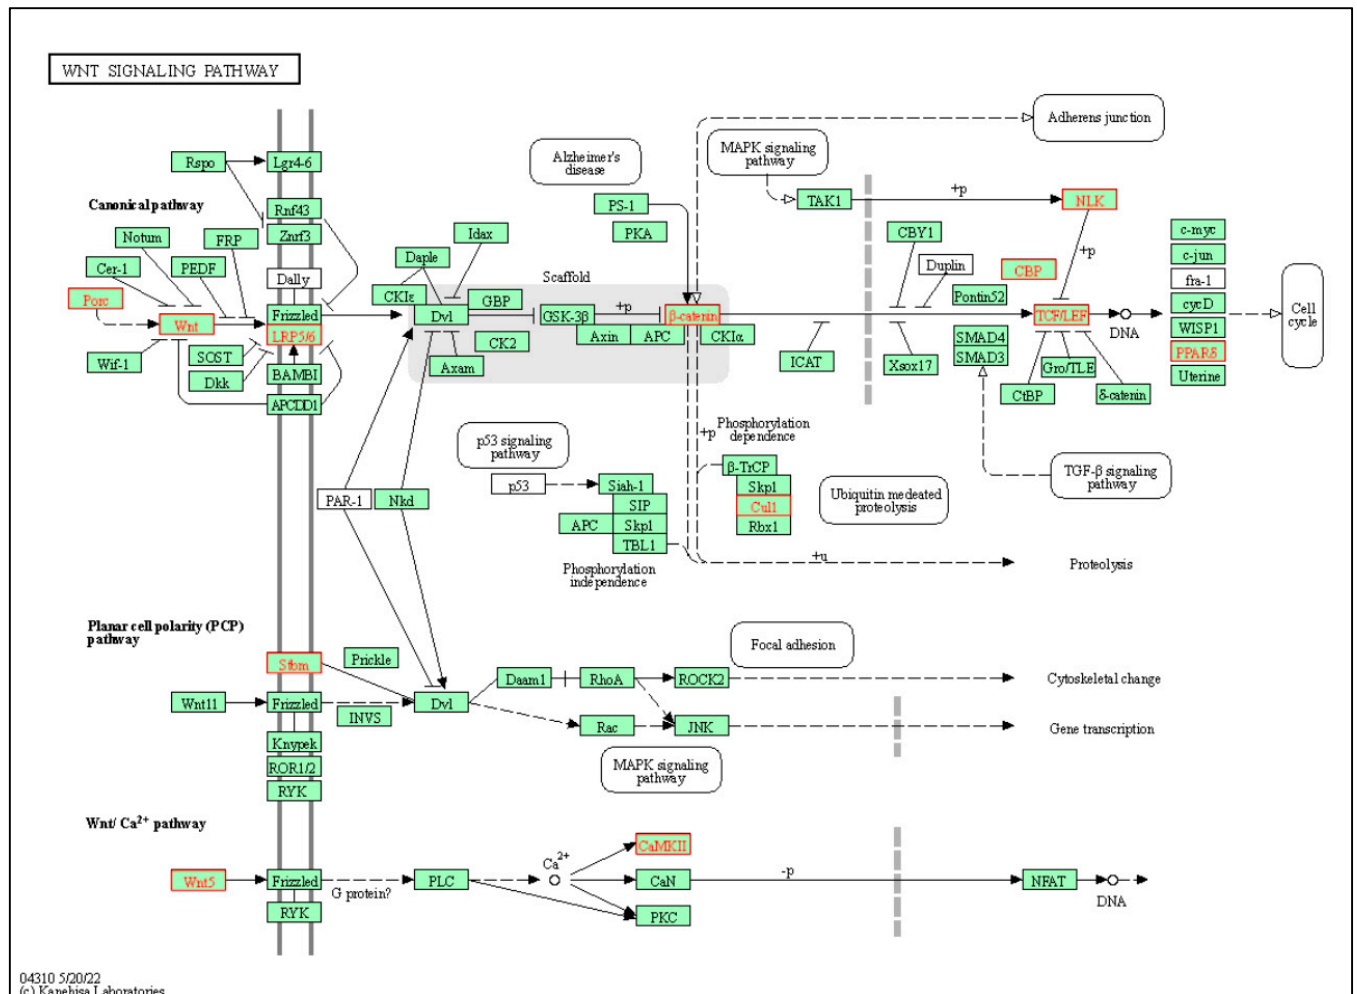

**Figure S1: Genes with high impact (in Red) in Wnt signalling pathway.**

Supplement: s1 [file s1]
